# Supplementary material for: Massively Targeted Evaluation of Therapeutic CRISPR Off-Targets in Cells
Source: Research Square preprint supplement (doi:10.21203/rs.3.rs-1427273/v1), 2022-03-17
Supplement: Supplementary file 1 [file Supplementary Data 1.xlsx]

## Sheet: Table S1
Table S1: A non-comprehensive list of methods developped for evaluating CRISPR off-targets
Methods	Principle	Application	Pros and Cons	REF
GUIDE-seq	NHEJ-mediated insertion double strand DNA into DSBs at OT sites	In vivo (live cells)	Pros: genome-scale, non-targeted, recap chromatin effect. Cons: Randon integration (false positive), DSBs repaired without inserting the dsDNA (false negative)	Nature Biotechnology volume 33, pages 187–197 (2015)
IDLV Capture	Insertion of Integration-defective Lentiviral Vectors (IDLV) at DSB sites	In vivo (live cells)	Pros: genome-scale, non-targeted, recap chromatin effect. Cons: DSBs repaired without inserting the IDLV, bona fide off-target sites cannot be captured (false negative)	Nat. Biotechnol. 2013;31:839–843.
LAM-HTGTS	Deep sequencing of translocations between target site and OTs	In vivo (live cells)	Pros: genome-scale, non-targeted, recap chromatin effect. Cons: Translocations are relative rare event, might not be able to detect OT sites with low efficiency	Nature Biotechnology volume 33, pages179–186(2015)
PEM-seq	Deep sequencing of translocations between target site and OTs, similar to HTGTS	In vivo (live cells)	Pros: genome-scale, non-targeted, recap chromatin effect. Cons: Translocations are relative rare event, might not be able to detect OT sites with low efficiency	Cell Discovery volume 5, Article number: 18 (2019)
DISCOVER-Seq	Isolation of DSB repair protein MRE11-assocaited DNA from cells, followed by deep sequencing	In vivo (live cells)	Pros: genome-scale, non-targeted, patially recap chromatin effect. Cons: DSBs in cells are not introduced silmultaneously. The method could fail to recapturate DSBs appear earlier or later than the experimental time point.	Science 19 Apr 2019:_x000B_Vol. 364, Issue 6437, pp. 286-289
BLISS	Ligation of IVT adaptor to DSB, followed by in vitro RNA transcription and RNA sequencing	In situ (cells/tissues, fixed)	Pros: genome-scale, non-targeted, patially recap chromatin effect. Cons: Fixation and in situ DNA cleavage could not fully recaptulate in vivo editing (false positive)	Nature Communications volume 8, Article number: 15058 (2017)
Digenome-seq	In vitro digestion of genomics DNA (linear form) with RGENs	in vitro (genomic DNA)	Pros: genome-scale, non-targeted, convential, and not depending on reference genomes. Cons: Lack of chromatin structure and cellular DNA repair machinary, typically detect far more OTs than in cell assays (false positive)	Nature Methods volume 12, pages 237–243 (2015)
CIRCLE-seq	In vitro digestion of genomics DNA (circular form) with RGENs	in vitro (genomic DNA)	Pros: genome-scale, non-targeted, convential, and not depending on reference genomes, less background signal than Digenome-seq. Cons: Lack of chromatin structure and cellular DNA repair machinary, typically detect far more OTs than in cell assays (false positive)	Nature Methods volume 14, pages607–614(2017)
SITE-seq	In vitro digestion of genomics DNA (linear) with RGENs, enrich DBSs with biotinylated adaptor	in vitro (genomic DNA)	Pros: genome-scale, non-targeted, convential, and not depending on reference genomes. Cons: Lack of chromatin structure and cellular DNA repair machinary, typically detect far more OTs than in cell assays (false positive)	Nature Methods volume 14, pages600–606(2017)
DIG-seq	In vitro digestion of cell-free chromatin DNA, followed by deep sequencing	In vitro (cell-free chromatin DNA)	Pros: genome-scale, non-targeted, convential, retain chromatin and not depending on reference genomes. Cons: The method is still based on in vitro RGEN cleavage, might still facing the same disadvange of high false positive rate.	Genome Res. 2018 Dec; 28(12): 1894–1900
(CUT)-PCR	Cells were first edited with RGENs, followed by 1st PCR amplificaiton of the predited off-target site, in vitro RGEN cleavage of PCR product, 2st PCR amplification and deep sequencing.	in vivo (live cells) + in vitro	Pros: Detect very low frequency indels, targeted. Cons: Low throughput	Nature Communications volume 11, Article number: 3596 (2020)
