# Supplementary material for: Massively Targeted Evaluation of Therapeutic CRISPR Off-Targets in Cells
Source: Research Square preprint supplement (doi:10.21203/rs.3.rs-1427273/v1), 2022-03-17
Supplement: Supplementary file 2 [file Supplementary Data 2.xlsx]

## Sheet: Table Guide
				Guide for Supplementary Data 2
	Sheet 1 Contains an overview of all RGNs and RGN OTs evaluted by previous methods T7E1, GUIDE-seq, and/or CIRCLE-seq. Concordance rates in detecting RGN off-targets between methods are provided. Figures are related to Figure 2a-d
	Shee 2 Contains OTs with detectable sequences reads by GUIDE-seq, detectable sequencing reads by CIRCLE-seq, and significant indels detected by SURRO-seq. This data were used to generate the Venn diagram presented in Figure 2e.
	Sheet 3 VEGFA site 1 RGN and OT efficiencies between four methods
	Sheet 4 VEGFA site 2 RGN and OT efficiencies between four methods
	Sheet 5 EMX1 RGN and OT efficiencies between three methods
	Sheet 6 HEK203 site 3 RGN and OT efficiencies between three methods
	Sheet 7 HEK293 site 4 RGN and OT efficiencies between three methods
	Sheet 8 HBB site 1 RGN and OT efficiencies between two methods
	Sheet 9 VEGFA site 3 RGN and OT efficiencies between two methods
	Sheet 10 FANCF RGN and OT efficiencies between two methods
	Sheet 11 HEK293 site 1 RGN and OT efficiencies between two methods
	Sheet 12 HBB site 2 RGN and OT efficiencies between two methods
	Sheet 13 HEK293 site 2 RGN and OT efficiencies between two methods
	Abbreviations
	RGI%	Relative gel intensity %, a semiquantitative method for evaluating indel efficiency by T7E1 methods
	RE%	Relative Efficiency %, value derived from OT/ON reads ratio %
	IF%	Relative indel frequency %, ration I/T reads %
	I/T reads	indel/total reads
	NA	value not available
	ND	not detected
	NS	not significant
	*	significant with adj p.vallue less than 0.05, SpCas9 indel requency/MOCK indel frequency > 2

## Sheet: Related 2a-d
An overview of all RNGs and OTs evaluated between four methods
gRNA	Number of OTs	Methods	REFs
VEGFA site 1	13	T7E1, GUIDE-seq, CIRCLE-seq, SURRO-seq	PMID: 23792628, 25513782, 28459458
VEGFA site 2	65	T7E1, GUIDE-seq, CIRCLE-seq, SURRO-seq	PMID: 23792628, 25513782, 28459458
EMX1	5	GUIDE-seq, CIRCLE-seq, SURRO-seq	PMID: 25513782, 28459458
HEK293 site 3	3	GUIDE-seq, CIRCLE-seq, SURRO-seq	PMID: 25513782, 28459458
HEK293 site 4	55	GUIDE-seq, CIRCLE-seq, SURRO-seq	PMID: 25513782, 28459458
HBB site 1	8	T7E1, SURRO-seq	PMID: 31279229
VEGFA site 3	7	T7E1, SURRO-seq	PMID: 23792628
FANCF	3	GUIDE-seq, SURRO-seq	PMID: 25513782
HEK293 site 1	2	GUIDE-seq, SURRO-seq	PMID: 25513782
HBB site 2	4	CIRCLE-seq, SURRO-seq	PMID: 28459458
HEK293 site 2	5	CIRCLE-seq, SURRO-seq	PMID: 28459458
SUM	170
Concordance rate in pOT identification between T7E1 and SURRO-seq
gRNA	T7E1	SURRO-seq	Con.Rate %
HBB site 1	8	8	100
VEGFA site 1	3	2	66.6667
VEGFA site 2	8	8	100
VEGFA site 3	7	7	100
Concordance rate in pOT identification between GUIDE-seq and SURRO-seq
gRNA	GUIDE-seq	SURRO-seq	Con.Rate %
EMX1	5	4	80
FANCF	3	2	66.6667
HEK293 site 1	2	2	100
HEK293 site 3	3	3	100
HEK293 site 4	55	40	72.7273
VEGFA site 1	13	7	53.8462
VEGFA site 2	67	42	62.6866
Concordance rate in pOT identification between CIRCLE-seq and SURRO-seq
gRNA	CIRCLE-seq	SURRO-seq	Con.Rate %
EMX1	5	2	40
HBB site 2	4	3	75
HEK293 site 2	5	0	0
HEK293 site 3	3	2	66.6667
HEK293 site 4	55	28	50.9091
VEGFA site 1	13	10	76.9231
VEGFA site 2	67	30	44.7761

## Sheet: Related to Fig2e
OT with detectable reads from GUIDE-seq, CIRCLE-seq and significant indels from SURRO-seq
gRNA
	GUIDE-seq	CIRCLE-seq	SURRO-seq
VEGFA site 1	OT1	OT2	OT2
VEGFA site 1	OT2	OT3	OT3
VEGFA site 1	OT3	OT4	OT4
VEGFA site 1	OT4	OT7	OT6
VEGFA site 1	OT5	OT10	OT7
VEGFA site 1	OT6	OT11	OT10
VEGFA site 1	OT7	OT12	OT11
VEGFA site 1	OT8	OT13
VEGFA site 1	OT9
	GUIDE-seq	CIRCLE-seq	SURRO-seq
VEGFA site 2	OT1	OT2	OT1
VEGFA site 2	OT2	OT3	OT2
VEGFA site 2	OT3	OT5	OT3
VEGFA site 2	OT4	OT6	OT4
VEGFA site 2	OT5	OT7	OT5
VEGFA site 2	OT6	OT9	OT6
VEGFA site 2	OT7	OT10	OT7
VEGFA site 2	OT8	OT13	OT8
VEGFA site 2	OT10	OT14	OT9
VEGFA site 2	OT12	OT27	OT10
VEGFA site 2	OT13	OT33	OT11
VEGFA site 2	OT14	OT34	OT12
VEGFA site 2	OT15	OT35	OT13
VEGFA site 2	OT16	OT36	OT14
VEGFA site 2	OT17	OT37	OT15
VEGFA site 2	OT18	OT38	OT19
VEGFA site 2	OT19	OT39	OT20
VEGFA site 2	OT20	OT40	OT21
VEGFA site 2	OT21	OT41	OT22
VEGFA site 2	OT22	OT42	OT23
VEGFA site 2	OT23	OT43	OT26
VEGFA site 2	OT24	OT44	OT27
VEGFA site 2	OT25	OT45	OT28
VEGFA site 2	OT26	OT46	OT29
VEGFA site 2	OT27	OT47	OT30
VEGFA site 2	OT28	OT48	OT31
VEGFA site 2	OT29	OT49	OT32
VEGFA site 2	OT30	OT50	OT34
VEGFA site 2	OT31	OT51	OT35
VEGFA site 2	OT32	OT52	OT36
VEGFA site 2		OT53	OT39
VEGFA site 2		OT54	OT42
VEGFA site 2		OT55	OT43
VEGFA site 2		OT56	OT44
VEGFA site 2		OT57	OT46
VEGFA site 2		OT58	OT48
VEGFA site 2		OT59	OT49
VEGFA site 2		OT60	OT51
VEGFA site 2		OT61	OT52
VEGFA site 2		OT62	OT53
VEGFA site 2		OT63	OT55
VEGFA site 2		OT64	OT58
VEGFA site 2		OT65	OT62
	GUIDE-seq	CIRCLE-seq	SURRO-seq
EMX1	OT1	OT3	OT1
EMX1	OT2		OT2
EMX1	OT3		OT3
EMX1	OT4		OT4
EMX1	OT5
	GUIDE-seq	CIRCLE-seq	SURRO-seq
HEK293 site 3	OT1	OT1	OT1
HEK293 site 3	OT2	OT2	OT2
HEK293 site 3		OT3
	GUIDE-seq	CIRCLE-seq	SURRO-seq
HEK293 site 4	OT1	OT1	OT1
HEK293 site 4	OT2	OT3	OT2
HEK293 site 4	OT3	OT4	OT3
HEK293 site 4	OT4	OT5	OT4
HEK293 site 4	OT5	OT6	OT5
HEK293 site 4	OT6	OT7	OT6
HEK293 site 4	OT7	OT10	OT7
HEK293 site 4	OT8	OT11	OT9
HEK293 site 4	OT9	OT12	OT10
HEK293 site 4	OT10	OT13	OT11
HEK293 site 4	OT11	OT14	OT12
HEK293 site 4	OT12	OT15	OT13
HEK293 site 4	OT13	OT16	OT14
HEK293 site 4	OT14	OT17	OT16
HEK293 site 4	OT15	OT18	OT17
HEK293 site 4	OT16	OT19	OT18
HEK293 site 4	OT17	OT23	OT19
HEK293 site 4	OT18	OT24	OT20
HEK293 site 4	OT19	OT27	OT27
HEK293 site 4	OT20	OT28	OT28
HEK293 site 4	OT21	OT31	OT34
HEK293 site 4	OT22	OT33	OT43
HEK293 site 4	OT23	OT34	OT47
HEK293 site 4	OT24	OT35
HEK293 site 4	OT25	OT36
HEK293 site 4	OT26	OT37
HEK293 site 4	OT27	OT38
HEK293 site 4	OT28	OT39
HEK293 site 4	OT29	OT40
HEK293 site 4	OT30	OT41
HEK293 site 4	OT31	OT42
HEK293 site 4	OT32	OT43
HEK293 site 4		OT44
HEK293 site 4		OT45
HEK293 site 4		OT46
HEK293 site 4		OT47
HEK293 site 4		OT48
HEK293 site 4		OT49
HEK293 site 4		OT50
HEK293 site 4		OT51
HEK293 site 4		OT52
HEK293 site 4		OT53
HEK293 site 4		OT54
HEK293 site 4		OT55

## Sheet: VEGFA site 1
		protospacer																				PAM			T7E1	GUIDE-seq		CIRCLE-seq		SURRO-seq
VEGFA T1	TRAPlabel	G	G	G	T	G	G	G	G	G	G	A	G	T	T	T	G	C	T	C	C	T	G	G	RGI%	RE%	reads	RE%	reads	IF%, SpCas9	I/T reads	IF%, MOCK	I/T reads	p.adj.
ON	11279	-	-	-	-	-	-	-	-	-	-	-	-	-	-	-	-	-	-	-	-	-	-	-	10.5	100	2685	100	736	63.29	1236/1953	0.09	2/2264	0	*
OT6	11307	-	-	-	-	-	-	-	-	-	-	-	-	-	-	-	-	-	C	-	-	A	-	-	NA	9.27	249	ND	ND	31.49	137/435	0.6	3/501	9.29377e-47	*
OT4	11305	T	A	-	-	-	-	A	-	-	-	-	-	C	-	-	-	-	-	-	-	-	-	-	NA	72.07	1935	130.98	964	20.88	3363/16110	0.12	24/20189	0	*
OT7	11282	-	C	-	-	-	-	-	-	-	-	T	-	-	-	-	-	-	-	-	-	C	-	-	NA	9.16	246	55.71	410	13.46	349/2592	0.08	2/2427	2.19921e-101	*
OT2	11308	C	-	-	G	-	-	A	-	-	-	-	-	-	-	-	-	-	-	-	-	-	-	-	3.67	13.97	375	136.68	1006	2.39	73/3058	0.12	3/2581	6.11723e-16	*
OT3	11283	-	-	-	G	A	-	-	-	-	A	-	-	-	-	-	-	-	-	-	-	-	-	-	8.54	30.5	819	68.75	506	1.79	34/1897	0.73	9/1227	0.0196382	*
OT10	11524	-	A	-	G	-	-	-	A	-	C	-	-	-	-	-	-	-	-	-	-	A	-	-	NA	ND	ND	87.23	642	1.14	26/2278	0.04	1/2518	1.59236e-07	*
OT11	11525	-	-	-	G	-	C	A	-	-	-	-	-	A	-	-	-	-	-	-	-	-	-	-	NA	ND	ND	81.25	598	0.87	33/3814	0.1	4/4049	7.04967e-07	*
OT5	11306	C	T	-	G	T	-	-	-	-	-	-	-	C	-	-	-	-	-	-	-	A	-	-	NA	12.07	324	ND	ND	0.65	7/1073	0	0/656	0.076151	NS
OT1	11281	-	-	-	A	-	-	-	T	-	-	-	-	-	-	-	-	-	-	-	-	-	-	-	8.32	22.23	597	ND	ND	0.27	13/4742	0.62	29/4679	0.0211128	NS
OT8	11309	-	T	-	G	-	-	-	T	A	-	-	-	-	-	-	-	-	-	-	-	A	-	-	NA	8.98	241	ND	ND	0.13	29/22221	0.15	28/18274	0.72224	NS
OT9	11310	-	A	-	G	-	T	-	-	-	-	-	-	-	-	-	A	-	-	-	-	-	-	-	NA	4.28	115	ND	ND	0.1	6/6051	0.12	6/4818	0.875928	NS
OT13	11527	-	-	C	-	-	-	A	-	-	-	G	A	-	-	-	-	-	-	-	-	-	-	-	NA	ND	ND	58.97	434	0.07	4/6075	0.13	7/5308	0.472683	NS
OT12	11526	A	T	-	-	-	T	-	-	-	-	-	A	-	-	-	-	-	-	-	-	A	-	-	NA	ND	ND	70.38	518	0.04	3/7997	0.07	5/7587	0.625511	NS

## Sheet: VEGFA site 2
		protospacer																				PAM			T7E1	GUIDE-seq		CIRCLE-seq		SURRO-seq
VEGFA T2	TRAPlabel	G	A	C	C	C	C	C	T	C	C	A	C	C	C	C	G	C	C	T	C	C	G	G	RGI%	RE%	reads	RE%	reads	IF%, SpCas9	I/T reads	IF%, MOCK	I/T reads	p.adj.
ON	11284	-	-	-	-	-	-	-	-	-	-	-	-	-	-	-	-	-	-	-	-	-	-	-	38.6	100	540	100	294	97	8350/8608	0.75	155/20568	0	*
OT6	11291	A	T	T	-	-	-	-	C	-	-	-	-	-	-	-	-	-	-	-	-	A	-	-	19.4	286.85	1549	448.98	1320	96.38	1492/1548	2.21	74/3352	0	*
OT5	11290	A	C	A	-	-	-	-	C	-	-	-	-	-	-	-	-	-	-	-	-	A	-	-	12.3	218.15	1178	259.18	762	95.53	2458/2573	0.2	17/8481	0	*
OT3	11287	C	T	A	-	-	-	-	-	-	-	-	-	-	-	-	-	-	-	-	-	-	-	-	15	100	540	211.56	622	93.21	851/913	0.4	2/494	7.9525e-306	*
OT4	11289	T	-	-	-	-	-	-	C	A	-	-	-	-	-	-	-	-	-	-	-	T	-	-	6.97	148.7	803	ND	ND	90.69	3818/4210	0.46	62/13387	0	*
OT2	11292	-	G	G	-	-	-	-	-	-	-	-	-	-	-	-	-	-	-	-	-	T	-	-	15.6	89.44	483	682.99	2008	87.57	3495/3991	0.07	8/11623	0	*
OT1	11499	-	-	-	-	-	-	-	C	-	-	-	-	-	-	-	-	-	-	C	-	-	-	-	33.6	72.41	391	ND	ND	83.79	1685/2011	0.3	8/2693	0	*
OT13	11286	-	C	T	T	-	-	-	-	-	-	-	-	-	-	-	-	-	A	-	-	-	-	-	NA	170.19	919	425.85	1252	77.91	3407/4373	1.4	196/14011	0	*
OT51	11285	C	C	G	-	-	-	-	-	-	-	-	-	-	-	-	-	-	-	A	-	T	-	-	NA	ND	ND	182.99	538	63.37	263/415	1.19	24/2014	3.05491e-209	*
OT14	11312	-	-	-	-	-	-	T	C	-	-	-	-	-	-	-	-	A	-	-	-	-	-	-	NA	142.04	767	182.31	536	56.19	608/1082	0.12	3/2547	0	*
OT31	11507	A	T	-	-	-	-	-	-	-	-	-	-	-	-	-	A	-	-	C	-	T	-	-	NA	22.41	121	ND	ND	55.3	5460/9874	0.32	99/30750	0	*
OT20	11313	C	T	G	-	-	-	-	C	-	-	-	-	-	-	-	-	-	-	A	-	T	-	-	NA	61.11	330	ND	ND	55.16	540/979	0.56	12/2130	1.16059e-307	*
OT19	11343	C	-	T	-	-	-	-	C	-	-	-	-	-	-	-	A	-	-	C	-	G	-	-	NA	62.22	336	ND	ND	52.29	503/962	0.36	10/2784	0	*
OT32	11322	C	-	A	-	-	-	-	C	-	-	-	-	-	-	-	-	-	T	-	-	A	-	-	NA	20.56	111	ND	ND	49.48	1085/2193	0.06	3/5328	0	*
OT8	11321	C	G	-	-	-	T	-	C	-	-	-	-	-	-	-	-	-	-	-	-	-	-	-	28.7	82.59	446	ND	ND	48.77	4578/9387	0.41	114/28092	0	*
OT44	11311	-	T	-	-	-	-	-	-	-	-	T	-	-	-	-	A	-	-	-	-	-	-	-	NA	ND	ND	214.29	630	38.94	493/1266	0.04	1/2264	8.47778e-250	*
OT36	11333	A	G	-	-	-	-	-	A	-	-	T	-	-	-	-	-	-	-	-	-	G	-	-	NA	ND	ND	304.76	896	37.45	3668/9795	0.17	38/21758	0	*
OT15	11335	C	C	T	-	-	-	-	C	A	-	-	-	-	-	-	-	-	A	-	-	-	-	-	NA	115.74	625	ND	ND	33.24	1950/5867	1.47	167/11357	0	*
OT11	11344	A	G	G	-	-	-	-	C	A	-	-	-	-	-	-	-	-	-	-	-	A	-	-	NA	ND	ND	ND	ND	31.91	90/282	0.15	1/664	8.40545e-51	*
OT29	11293	C	-	-	T	-	-	-	C	-	-	-	-	-	-	-	-	-	-	C	-	A	-	-	NA	23.7	128	ND	ND	27.44	517/1884	1.47	67/4572	5.26393e-220	*
OT28	11511	T	C	-	A	-	-	-	C	-	-	-	-	-	-	-	-	-	-	C	-	G	-	-	NA	25	135	ND	ND	27.09	1510/5574	0.25	28/11165	0	*
OT21	11493	C	T	T	-	-	-	-	C	A	-	-	-	-	-	-	-	-	-	C	-	A	-	-	NA	47.41	256	ND	ND	24.37	97/398	0.46	7/1524	2.58959e-61	*
OT22	11495	A	G	G	-	-	-	-	C	-	-	G	-	-	-	-	-	-	-	-	-	A	-	-	NA	46.67	252	ND	ND	21.15	386/1825	0.2	5/2523	3.12404e-147	*
OT9	11484	C	T	-	-	-	-	A	C	-	-	-	-	-	-	-	-	-	-	-	-	A	-	-	29.8	ND	ND	207.48	610	20.01	871/4353	0.24	20/8464	0	*
OT58	11317	-	C	-	-	-	-	-	A	-	-	-	-	-	-	-	A	-	-	C	-	-	-	-	NA	ND	ND	154.42	454	17.9	194/1084	0.72	19/2645	1.07548e-85	*
OT23	11296	C	-	T	A	-	-	-	C	-	-	-	-	-	-	-	-	-	-	C	-	G	-	-	NA	43.52	235	ND	ND	17.73	1172/6610	0.51	87/17133	0	*
OT30	11488	C	-	T	T	-	-	-	C	-	-	-	-	-	-	-	A	-	-	-	-	A	-	-	NA	22.78	123	ND	ND	12.92	131/1014	0.39	10/2556	3.75816e-61	*
OT10	11339	T	G	-	-	-	-	T	C	-	-	-	-	-	-	-	-	-	-	-	-	T	-	-	NA	146.48	791	308.16	906	11.51	3539/30753	0.18	127/70368	0	*
OT7	11338	C	C	-	-	A	-	-	C	-	-	-	-	-	-	-	-	-	-	-	-	A	-	-	NA	130.37	704	153.74	452	9.58	377/3934	0.63	60/9515	7.90446e-141	*
OT46	11327	C	-	-	-	-	-	-	-	-	-	C	-	T	-	-	-	-	-	-	-	A	-	-	NA	ND	ND	200.68	590	9.17	415/4527	0.71	84/11797	1.6058e-151	*
OT12	11328	T	G	-	-	-	-	-	C	-	-	-	-	-	-	-	A	-	-	-	-	T	-	-	NA	205	1107	ND	ND	5.8	4/69	0	0/197	0.00724659	*
OT26	11294	-	-	-	-	-	-	T	C	A	-	-	-	-	-	-	-	-	-	C	-	T	-	-	NA	33.15	179	ND	ND	5.38	699/12985	0.19	45/23578	2.186e-255	*
OT27	11500	C	T	-	-	-	-	-	G	-	-	-	-	-	-	-	-	-	-	C	-	A	-	-	NA	26.11	141	140.82	414	5.33	229/4294	0.6	67/11251	1.29114e-71	*
OT55	11482	-	G	-	-	-	T	-	-	-	-	-	-	T	-	-	A	-	-	-	-	A	-	-	NA	ND	ND	168.71	496	4.89	604/12348	0.13	38/28492	1.2757e-262	*
OT43	11514	-	G	-	-	-	-	-	-	-	-	T	-	-	T	-	-	-	-	-	-	T	-	-	NA	ND	ND	223.13	656	4.11	476/11572	0.07	16/22952	4.55182e-202	*
OT39	11330	-	T	-	-	-	-	T	C	-	-	T	-	-	-	-	-	-	-	-	-	T	-	-	NA	ND	ND	251.02	738	3.96	168/4243	0.11	9/8265	4.3456e-67	*
OT47	11341	-	-	-	-	-	-	-	-	-	-	T	-	-	-	-	-	G	-	C	T	-	-	-	NA	ND	ND	199.32	586	2.32	59/2542	2.54	115/4531	0.751646	NS
OT34	11295	A	C	T	-	-	-	-	-	-	-	-	-	-	-	-	-	G	-	-	-	G	-	-	NA	ND	ND	340.82	1002	2.16	306/14169	0.23	71/30810	3.20574e-88	*
OT35	11483	T	-	-	T	-	-	-	C	-	-	-	-	-	-	A	-	-	-	-	-	A	-	-	NA	ND	ND	306.12	900	1.98	92/4642	0.32	25/7896	8.43326e-20	*
OT42	11492	-	-	-	-	-	-	A	C	-	T	-	-	-	-	-	A	-	-	-	-	A	-	-	NA	ND	ND	225.85	664	1.45	225/15551	0.15	50/33125	4.71122e-65	*
OT52	11508	T	T	-	-	-	-	T	-	-	-	-	-	-	-	A	-	-	-	-	-	T	-	-	NA	ND	ND	180.27	530	1.38	106/7683	0.05	9/17169	3.92532e-43	*
OT49	11502	A	-	-	-	T	-	-	A	-	-	T	-	-	-	-	-	-	-	-	-	A	-	-	NA	ND	ND	195.24	574	1.3	118/9072	0.08	17/20472	1.71498e-42	*
OT62	11518	-	C	-	-	-	G	-	-	-	-	T	-	-	-	-	-	-	-	-	-	-	-	-	NA	ND	ND	148.3	436	1.23	48/3903	0.67	53/7909	0.00474224	*
OT64	11522	-	-	-	-	-	-	T	C	-	-	C	-	-	-	-	A	-	-	-	-	A	-	-	NA	ND	ND	138.78	408	1.06	10/947	1.12	21/1880	1	NS
OT54	11510	-	C	-	-	A	-	-	-	-	-	-	-	-	-	-	A	-	-	C	-	T	-	-	NA	ND	ND	174.15	512	1.02	41/4001	1.22	83/6820	0.513222	NS
OT48	11332	A	-	-	-	-	-	A	-	-	-	-	-	-	-	G	-	-	-	-	-	A	-	-	NA	ND	ND	195.24	574	0.98	83/8487	0.09	12/13677	8.95162e-23	*
OT53	11498	T	T	-	T	-	-	-	-	-	-	T	-	-	-	-	-	-	-	-	-	G	-	-	NA	ND	ND	174.15	512	0.84	83/9867	0.15	30/20358	1.63455e-18	*
OT17	11318	-	-	-	A	-	A	-	C	-	-	-	-	-	-	-	A	-	-	-	-	A	-	-	NA	76.67	414	ND	ND	0.79	41/5218	0.87	120/13752	0.72224	NS
OT40	11501	C	T	-	-	-	-	-	-	-	-	C	-	-	-	A	-	-	-	-	-	T	-	-	NA	ND	ND	244.22	718	0.59	46/7781	0.54	85/15854	0.717353	NS
OT41	11509	-	C	-	A	-	-	-	C	-	-	-	-	-	-	T	-	-	-	-	-	-	-	-	NA	ND	ND	229.25	674	0.49	10/2042	0.58	24/4172	0.845691	NS
OT50	11319	C	-	-	-	-	-	-	-	-	A	-	-	A	-	-	-	-	-	-	-	A	-	-	NA	ND	ND	189.8	558	0.4	1/247	0.19	1/525	0.672265	NS
OT18	11490	T	C	-	-	-	-	-	C	A	-	C	-	-	-	G	A	-	-	-	-	A	-	-	NA	67.59	365	ND	ND	0.32	10/3135	0.32	22/6948	1	NS
OT37	11491	T	G	-	-	-	-	-	-	-	-	C	-	-	-	A	-	-	-	-	-	T	-	-	NA	ND	ND	270.07	794	0.27	13/4884	0.78	76/9753	0.000183303	NS
OT38	11503	C	-	-	-	-	-	A	C	-	-	-	-	-	-	-	T	-	-	-	-	T	-	-	NA	ND	ND	259.86	764	0.25	22/8792	0.25	47/18826	1	NS
OT65	11320	A	-	-	-	-	T	-	-	-	-	-	-	-	-	A	-	T	-	-	-	A	-	-	NA	ND	ND	137.41	404	0.23	19/8232	0.44	70/15952	0.0212293	NS
OT59	11486	-	T	-	-	A	-	-	-	-	-	-	-	-	-	-	A	-	-	-	-	-	A	-	NA	ND	ND	150.34	442	0.19	13/6838	0.32	51/16071	0.150722	NS
OT60	11487	-	-	-	-	-	-	T	C	-	-	T	-	-	-	-	A	-	-	-	-	A	-	-	NA	ND	ND	149.66	440	0.14	1/692	0.13	2/1494	1	NS
OT33	11523	T	T	-	-	-	-	-	-	-	-	T	-	-	-	A	-	-	-	-	-	T	-	-	NA	ND	ND	351.02	1032	0.12	3/2512	0.12	7/5961	1	NS
OT63	11515	C	-	-	-	-	-	-	-	-	-	C	-	-	-	A	-	-	-	-	-	T	-	-	NA	ND	ND	140.82	414	0.12	3/2598	0.17	12/6919	0.875928	NS
OT57	11516	A	-	-	-	-	A	T	-	-	-	-	-	-	-	T	-	-	-	-	-	A	-	-	NA	ND	ND	157.82	464	0.1	11/10518	0.38	73/19389	1.75597e-05	NS
OT24	11521	C	G	-	-	-	T	-	C	-	-	-	T	T	-	-	-	-	-	C	-	G	-	-	NA	37.41	202	ND	ND	0.06	5/8883	0.16	29/18021	0.0431386	NS
OT56	11481	-	-	-	-	-	-	T	A	-	-	-	-	-	-	-	A	T	-	-	-	A	-	-	NA	ND	ND	167.35	492	0.06	2/3380	0.07	4/5766	1	NS
OT61	11513	-	T	-	-	-	-	-	G	-	-	-	-	-	-	-	-	G	-	A	-	T	-	-	NA	ND	ND	148.98	438	0.05	2/4001	0.08	8/10080	0.859301	NS
OT16	11331	C	C	-	-	-	T	-	C	-	-	G	-	-	-	-	-	-	-	C	-	-	-	-	NA	111.67	603	ND	ND	0	0/1549	0.12	5/4191	0.437946	NS
OT25	11512	-	-	G	-	T	-	-	C	-	-	-	-	-	-	-	-	-	-	C	-	G	-	-	NA	35.56	192	ND	ND	0	0/598	0.32	5/1584	0.437946	NS
OT45	11517	C	-	-	-	-	-	-	A	-	A	-	-	-	-	-	-	-	-	A	-	A	-	-	NA	ND	ND	202.72	596	0	0/449	0.22	1/457	1	NS

## Sheet: EMX1
		protospacer																				PAM			GUIDE-seq		CIRCLE-seq		SURRO-seq
EMX1	TRAPlabel	G	A	G	T	C	C	G	A	G	C	A	G	A	A	G	A	A	G	A	A	G	G	G	RE%	reads	RE%	reads	IF%, SpCas9	I/T reads	IF%, MOCK	I/T reads	p.adj.
ON	11367	-	-	-	-	-	-	-	-	-	-	-	-	-	-	-	-	-	-	-	-	-	-	-	100	4521	100	1004	100	136/136	NA	NA	NA	NA
OT1	11368	-	-	-	-	T	A	-	-	-	-	-	-	-	-	-	-	-	-	-	-	A	-	-	69.08	3123	ND	ND	23.74	3335/14049	0.23	42/18442	0	*
OT2	11369	-	-	-	-	-	T	A	-	-	-	-	-	-	-	-	-	-	-	-	-	-	A	-	31.96	1445	ND	ND	12.87	520/4040	0.23	9/3914	2.76624e-144	*
OT3	11371	-	-	-	-	-	-	T	-	-	-	-	-	G	-	-	-	-	-	-	-	-	A	-	8.63	390	47.61	478	32.54	68/209	0.56	1/179	1.34793e-19	*
OT4	11372	A	-	-	-	-	T	-	-	-	-	-	C	-	-	-	-	-	-	-	-	T	-	-	5.71	258	ND	ND	7.43	791/10652	0.19	21/10784	1.5088e-211	*
OT5	11374	-	-	-	C	-	G	-	-	-	-	-	-	-	-	-	-	-	-	G	-	-	-	-	3.16	143	ND	ND	0.14	6/4235	0.05	2/4319	0.246984	NS

## Sheet: HEK293 site 3
		protospacer																				PAM			GUIDE-seq		CIRCLE-seq		SURRO-seq
HEK293 site 3	TRAPlabel	G	G	C	C	C	A	G	A	C	T	G	A	G	C	A	C	G	T	G	A	T	G	G	RE%	reads	RE%	reads	IF%, SpCas9	I/T reads	IF%, MOCK	I/T reads	p.adj.
ON	11386	-	-	-	-	-	-	-	-	-	-	-	-	-	-	-	-	-	-	-	-	-	-	-	100	2074	100	674	100	634/634	NA	NA	NA	NA
OT1	11387	C	A	-	-	-	-	-	-	-	-	-	-	-	-	-	-	-	-	-	C	-	-	-	15.77	327	64.75	518	4.04	373/9230	0.13	14/10657	8.30744e-105	*
OT2	11389	A	-	-	T	-	-	-	-	-	-	-	-	-	-	-	A	-	-	-	-	G	-	-	6.56	136	63	504	2.26	88/3894	0.16	7/4267	1.61814e-20	*
OT3	11431	-	A	G	-	-	-	-	-	A	-	-	-	-	-	-	-	-	-	-	-	G	-	-	ND	ND	76.26	514	0.04	1/2314	0.07	2/2857	1	NS

## Sheet: HEK293 site 4
		protospacer																				PAM			GUIDE-seq		CIRCLE-seq		SURRO-seq
HEK293 site 4	TRAPlabel	G	G	C	A	C	T	G	C	G	G	C	T	G	G	A	G	G	T	G	G	G	G	G	RE%	reads	RE%	reads	IF%, SpCas9	I/T reads	IF%, MOCK	I/T reads	p.adj.
ON	11390	-	-	-	-	-	-	-	-	-	-	-	-	-	-	-	-	-	-	-	-	-	-	-	100	1054	100	1424	95.13	2151/2261	2.07	184/8887	0	*
OT1	11391	-	-	-	T	-	-	-	-	-	-	-	-	-	-	-	-	-	G	-	-	T	-	-	191.65	2020	74.86	1066	23.96	935/3902	0.29	14/4825	0	*
OT2	11392	-	-	-	-	-	G	A	-	-	-	-	-	-	-	-	-	-	-	-	-	-	-	-	130.46	1375	ND	ND	35.62	2389/6706	0.61	90/14751	0	*
OT3	11394	T	-	-	-	-	-	-	-	-	-	-	C	-	-	-	-	-	A	-	-	T	-	-	234.82	2475	63.48	904	28.25	1649/5838	0.38	49/13036	0	*
OT4	11395	-	-	-	G	-	-	-	-	-	-	-	G	-	-	-	-	-	-	-	-	A	-	-	95.07	1002	29.49	420	25.85	227/878	0.42	7/1657	2.57278e-102	*
OT5	11396	-	-	-	-	-	-	-	A	-	A	-	-	-	-	G	-	-	-	-	-	-	-	-	93.17	982	59.55	848	33.67	263/781	0.4	4/1009	2.55862e-100	*
OT6	11397	A	-	-	-	G	-	-	-	-	-	-	-	A	-	-	-	-	-	-	-	T	-	-	93.07	981	31.88	454	45.95	4080/8880	0.2	41/20536	0	*
OT7	11398	-	-	-	-	-	-	-	-	T	-	-	-	-	-	G	-	-	-	-	-	T	-	-	74.86	789	41.43	590	38.92	1554/3993	0.16	12/7680	0	*
OT8	11399	-	-	-	-	-	-	-	G	-	-	-	-	-	-	G	-	-	A	-	-	-	-	-	67.55	712	ND	ND	0.2	12/5909	0.25	22/8815	0.727926	NS
OT9	11400	-	-	-	-	-	-	-	G	-	-	T	-	-	-	-	-	-	-	-	-	-	-	-	63	664	ND	ND	10.68	409/3829	0.17	17/9901	2.7365e-206	*
OT10	11401	A	-	G	-	-	-	-	-	-	-	-	-	-	-	G	-	-	-	-	-	T	-	-	62.24	656	42.42	604	30.18	933/3091	0.1	5/4952	0	*
OT11	11402	-	-	-	-	-	-	-	A	-	-	G	-	-	-	-	-	-	-	-	-	-	-	-	61.67	650	28.51	406	1.77	110/6209	0.12	13/10959	1.44725e-34	*
OT12	11403	-	A	-	-	-	C	A	-	-	-	-	-	-	-	-	-	A	-	-	-	T	-	-	61.1	644	30.48	434	9.24	417/4514	0.1	6/6254	4.23238e-151	*
OT13	11404	-	-	-	-	-	-	-	T	-	-	-	-	-	C	-	-	-	-	-	-	A	-	-	51.14	539	34.69	494	17.15	82/478	0.33	4/1197	1.81992e-41	*
OT14	11405	A	-	-	-	-	-	-	T	-	-	-	-	-	-	G	-	-	A	-	-	-	-	-	50.85	536	37.64	536	1.93	92/4761	0.27	21/7859	4.1513e-21	*
OT15	11406	-	-	-	-	A	-	-	T	-	-	-	-	-	A	-	-	-	-	-	-	-	-	-	42.22	445	38.76	552	0.83	51/6145	0.57	64/11189	0.0774322	NS
OT16	11407	-	C	-	-	-	-	-	G	-	-	-	-	-	-	G	-	-	-	-	-	-	-	-	34.25	361	37.5	534	7.14	685/9594	0.18	35/19602	1.46437e-284	*
OT17	11408	T	-	-	-	-	-	-	T	-	-	-	-	-	-	-	-	A	-	-	-	-	-	-	33.4	352	31.88	454	1.53	74/4829	0.28	20/7038	1.83862e-13	*
OT18	11410	-	C	-	-	-	-	-	-	A	-	-	-	A	-	-	-	-	-	-	-	A	-	-	28.18	297	41.29	588	4.54	233/5137	0.36	33/9200	1.55074e-69	*
OT19	11411	-	-	-	-	-	-	-	-	-	-	G	-	-	-	-	-	-	C	-	-	-	-	-	23.62	249	29.78	424	3.83	91/2375	0.04	1/2802	7.80846e-30	*
OT20	11412	A	-	-	-	-	-	-	T	-	C	-	-	-	-	G	-	-	-	-	-	-	-	-	22.87	241	ND	ND	4.04	246/6086	0.28	31/10906	4.66752e-76	*
OT21	11414	-	A	G	G	-	-	-	-	-	-	-	-	-	-	G	-	-	-	-	-	A	-	-	21.54	227	ND	ND	0.41	20/4860	0.54	43/8029	0.472046	NS
OT22	11415	-	-	-	T	-	C	-	-	A	-	-	-	-	-	-	-	-	-	-	-	-	-	-	19.07	201	ND	ND	0.35	2/577	0.35	3/859	1	NS
OT23	11416	A	-	-	-	-	-	-	T	-	-	-	-	-	-	G	-	-	A	-	-	C	-	-	18.79	198	32.44	462	0.32	14/4392	0.33	27/8226	1	NS
OT24	11417	-	T	-	-	-	-	-	-	A	-	-	-	-	-	-	-	-	A	-	-	-	-	-	18.41	194	30.34	432	0.08	3/3560	0.12	8/6472	0.875243	NS
OT25	11418	-	-	-	T	-	-	-	A	-	-	-	C	A	-	-	-	-	-	-	-	T	-	-	18.22	192	ND	ND	0.26	3/1135	0.23	3/1280	1	NS
OT26	11419	A	-	-	-	-	G	-	-	A	-	-	-	-	-	-	-	-	A	-	-	-	-	-	18.22	192	ND	ND	0.07	4/5349	0.12	10/8408	0.719114	NS
OT27	11420	A	-	-	-	-	-	-	-	A	-	-	-	-	-	G	A	-	-	-	-	A	-	-	16.98	179	33.15	472	1.78	144/8079	0.34	41/12099	2.06341e-25	*
OT28	11423	-	-	-	T	G	-	-	-	-	-	-	C	A	-	-	-	-	-	-	-	A	-	-	13.09	138	33.15	472	0.81	40/4914	0.15	12/7878	4.58352e-08	*
OT29	11427	-	A	-	-	-	C	-	T	-	A	-	-	-	-	-	-	-	-	-	-	A	-	-	11.01	116	ND	ND	0.24	2/846	0.23	2/857	1	NS
OT30	11428	-	-	-	-	-	-	-	-	C	A	-	-	-	-	G	-	-	-	-	A	-	-	-	11.01	116	ND	ND	0.08	5/6346	0.11	13/12077	0.751646	NS
OT31	11429	C	A	-	-	-	-	-	-	A	-	-	-	-	-	-	-	-	-	-	-	T	-	-	10.25	108	37.5	534	0.07	2/2735	0.07	4/5533	1	NS
OT32	11430	A	-	-	-	-	-	-	-	A	-	A	-	-	-	-	-	-	A	-	-	C	-	-	9.68	102	ND	ND	0.08	1/1248	0.13	3/2309	1	NS
OT33	11434	T	-	-	T	-	-	-	-	-	-	-	A	-	-	-	-	-	A	-	-	A	-	-	ND	ND	55.2	786	0.1	8/8232	0.1	15/15699	1	NS
OT34	11435	-	A	-	T	-	-	-	-	A	-	-	-	-	A	-	-	-	-	-	-	-	-	-	ND	ND	46.77	666	0.46	28/6074	0.1	15/14319	3.90158e-06	*
OT35	11436	-	-	-	C	A	-	-	-	-	-	-	-	-	-	T	-	-	-	-	-	T	-	-	ND	ND	43.68	622	0.04	2/5400	0.12	12/9775	0.227841	NS
OT36	11437	-	-	-	T	-	-	-	-	A	-	-	-	-	T	-	-	-	A	-	-	A	-	-	ND	ND	39.75	566	0.17	4/2413	0.16	6/3643	1	NS
OT37	11439	T	-	-	-	-	C	-	-	-	-	-	-	-	-	G	-	C	-	-	-	A	-	-	ND	ND	38.62	550	0.1	1/991	0.2	3/1477	0.77309	NS
OT38	11440	-	-	-	C	-	-	-	-	T	A	-	-	-	-	G	-	-	-	-	-	T	-	-	ND	ND	37.36	532	0.07	22/31462	0.22	124/55481	4.02595e-08	NS
OT39	11441	A	-	-	-	-	-	-	-	-	C	T	-	-	-	G	-	-	-	-	-	-	-	-	ND	ND	36.66	522	0.03	1/3095	0.52	30/5728	6.88309e-05	NS
OT40	11444	-	-	-	C	-	-	-	-	T	-	-	-	-	-	-	-	-	-	-	C	T	-	-	ND	ND	36.24	516	0.07	3/4413	0.14	11/7661	0.377503	NS
OT41	11445	-	A	-	-	-	A	A	-	-	-	-	A	-	-	-	-	-	-	-	-	C	-	-	ND	ND	36.1	514	0	0/714	0.07	1/1502	1	NS
OT42	11447	-	A	-	-	-	-	-	-	C	T	-	-	-	-	G	-	-	-	-	-	-	-	-	ND	ND	35.25	502	0.07	6/8761	0.16	21/13411	0.116022	NS
OT43	11448	-	T	A	-	-	-	-	-	-	-	-	-	-	-	C	-	-	-	-	-	T	-	-	ND	ND	34.69	494	4.77	290/6084	0.19	15/7904	2.11644e-85	*
OT44	11450	A	-	-	-	A	-	A	-	-	-	A	-	-	-	-	-	-	-	-	-	A	-	-	ND	ND	34.13	486	0.09	4/4675	0.15	12/7982	0.556561	NS
OT45	11451	-	C	-	-	-	A	-	-	-	-	-	C	-	-	-	-	-	-	-	-	C	A	-	ND	ND	33.99	484	0.11	2/1796	0.12	3/2481	1	NS
OT46	11452	-	C	-	-	-	-	-	T	-	-	-	-	-	-	-	-	-	-	-	-	-	-	A	ND	ND	32.87	468	0.08	4/4973	0.19	13/6973	0.212932	NS
OT47	11453	-	-	-	-	-	-	-	-	A	-	T	-	-	-	G	-	-	-	-	-	-	A	-	ND	ND	32.3	460	1.34	60/4482	0.17	12/7132	1.51029e-14	*
OT48	11454	-	-	A	-	-	-	-	T	-	-	-	-	-	-	G	-	A	-	-	-	-	-	-	ND	ND	31.6	450	0.14	5/3463	0.08	5/6355	0.441253	NS
OT49	11455	A	-	-	-	-	A	-	-	A	-	-	-	-	C	-	-	-	-	-	-	-	-	-	ND	ND	31.46	448	0.09	6/6436	0.62	76/12346	2.88219e-08	NS
OT50	11456	-	A	-	-	-	A	-	T	-	-	-	-	-	-	-	-	-	-	-	T	-	-	-	ND	ND	30.9	440	0.07	6/8883	0.28	35/12346	0.00063267	NS
OT51	11458	-	-	-	C	-	-	-	-	-	-	-	-	T	-	G	-	-	-	A	-	-	-	-	ND	ND	30.48	434	0.23	5/2215	0.71	39/5500	0.0184638	NS
OT52	11459	-	C	T	G	-	-	-	-	-	-	-	-	-	-	-	-	-	-	-	-	-	-	A	ND	ND	30.34	432	0.08	11/14615	0.14	30/20979	0.11977	NS
OT53	11461	-	-	T	T	-	-	-	-	-	-	T	-	-	-	G	-	-	-	-	-	-	-	-	ND	ND	29.92	426	0.03	3/9257	0.24	27/11319	0.000108898	NS
OT54	11462	T	-	-	-	-	-	-	-	A	-	-	-	-	C	-	-	-	-	-	-	A	-	-	ND	ND	28.93	412	0.07	3/4362	0.09	9/9871	1	NS
OT55	11463	-	-	-	T	G	-	-	-	-	-	-	-	-	-	G	-	-	-	-	-	-	-	A	ND	ND	28.51	406	0.08	3/3970	0.18	12/6619	0.267447	NS

## Sheet: HBB site 1
		protospacer																				PAM			T7E1	SURRO-seq
HBB T1	traplabel	G	T	A	A	C	G	G	C	A	G	A	C	T	T	C	T	C	C	T	C	A	G	G	RGI%	IF%, SpCas9	I/T reads	IF%, MOCK	I/T reads	p.adj.
ON	11259	-	-	-	-	-	-	-	-	-	-	-	-	-	-	-	-	-	-	-	-	-	-	-	35.2	95.83	3974/4147	0.48	59/12334	0	*
OT1	11260	T	G	-	G	-	-	-	-	-	-	-	G	-	-	-	-	-	-	-	-	C	-	-	0	0.3	45/14964	0.41	56/13561	0.197044	NS
OT2	11261	C	-	G	-	-	C	C	-	-	-	-	-	-	-	-	-	-	-	-	-	-	-	-	0	0	0/674	0.08	1/1333	1	NS
OT3	11262	T	-	-	-	A	-	-	A	-	-	-	-	-	-	-	-	-	-	-	-	-	-	-	0	0.09	6/6520	0.07	4/5520	0.875928	NS
OT4	11263	T	-	G	-	-	A	-	-	-	-	T	-	-	-	-	-	-	-	-	-	-	-	-	0	0.05	1/1865	0.19	2/1071	0.402738	NS
OT5	11264	-	G	-	G	G	-	-	-	-	-	G	-	-	-	-	-	-	-	-	-	T	-	-	0	0.06	14/25223	0.12	23/19857	0.0490027	NS
OT6	11276	-	A	-	-	A	-	-	-	-	-	-	-	-	-	-	-	-	-	C	-	T	A	-	0	1.78	9/507	3.28	11/335	0.24331	NS
OT7	11277	C	A	C	C	A	-	A	T	G	-	-	-	-	-	-	-	-	-	-	-	C	A	-	0	0.05	16/33415	0.12	33/27065	0.00384538	NS
OT8	11278	-	G	-	-	T	-	A	G	G	-	-	-	-	-	-	-	-	-	-	-	C	A	-	0	0.08	5/5946	0.12	7/6063	0.875928	NS

## Sheet: VEGFA site 3
		protospacer																				PAM			T7E1	SURRO-seq
VEGFA T3	traplabel	G	G	T	G	A	G	T	G	A	G	T	G	T	G	T	G	C	G	T	G	T	G	G	RGI%	IF%, SpCas9	I/T reads	IF%, MOCK	I/T reads	p.adj.
ON	11297	-	-	-	-	-	-	-	-	-	-	-	-	-	-	-	-	-	-	-	-	-	-	-	35.7	94.12	1632/1734	0.12	6/4891	0	*
OT1	11298	-	-	-	-	-	-	-	-	-	-	-	-	-	-	-	-	T	-	-	-	A	-	-	8.97	81.02	3860/4764	0.29	20/7009	0	*
OT2	11299	A	-	-	-	-	-	-	-	-	-	-	-	-	-	-	-	T	-	-	-	G	-	-	23.9	75.34	1699/2255	1.23	41/3346	0	*
OT3	11300	-	C	-	-	-	-	-	-	-	-	-	-	-	A	-	-	-	-	-	-	-	-	-	11.2	25.77	2490/9663	0.1	21/21465	0	*
OT4	11301	-	-	-	-	-	-	-	-	-	-	-	-	C	-	-	-	-	-	G	-	-	-	-	2.34	1.68	53/3150	0.11	2/1830	1.5311e-08	*
OT5	11302	-	T	-	-	-	-	-	-	-	A	-	-	-	-	-	-	-	-	-	-	A	-	-	1.27	23.15	2422/10462	0.11	10/9372	0	*
OT6	11303	T	-	-	-	G	-	-	-	-	-	-	-	-	-	-	-	-	-	-	-	A	-	-	12.1	38.75	1773/4576	0.04	5/11120	0	*
OT7	11304	A	-	A	-	-	-	-	-	-	-	-	-	-	-	-	-	-	A	-	-	A	-	-	7.64	34.66	2778/8015	0.1	8/7853	0	*

[truncated: 4 more sheets: FANCF, HEK293 site 1, HBB site 2, HEK293 site 2]
