# Supplementary material for: Massively Targeted Evaluation of Therapeutic CRISPR Off-Targets in Cells
Source: Research Square preprint supplement (doi:10.21203/rs.3.rs-1427273/v1), 2022-03-17
Supplement: Supplementary file 3 [file Supplementary Data 3.xlsx]

## Sheet: Guide for Table S3
	Guideline for Supplementary Data 3
	data 3.1	An overview of RGNs in LibB, Including application, gene, SURRO-seq oligo ID, protospacer sequencing, PAM and original studies using these RGNs
	data 3.2	List of synthetic oligos included in LibB
	data 3.3	SURRO-seq results of LibB, including total reads, indels reads, and statistics
	data 3.4	Summary of RGN, and number of OTs with significant/non-significant indels quantified by SURRO-seq
	data 3.5	Gene and genome annotation of sig. OTs
	abbre. and glossary
	OT	RGN off-targets. These potential off-target sites were predicted simply based on number of mismatches. In the design of LibB, we allowed upto four mismatches between gRNA spacer and the protospacer.
	Sig.	OTs with significantly detectal indels (FC > 2, adj.p value < 0.05)
	NS.	OTs with not significantly detectal indels (FC =< 2 or adj.p value >= 0.05)
	LIOT	Sig. OTs, IF% less than 3%
	HIOT	Sig. OTs, IF% equal or larger than 3%

## Sheet: Data 3.1 Overview of RGNs
#S3.1 An overview of RGNs included in LibB. REFs are studies using these RGNs for teh corresponding gene therapy applications.
Disease.therapy application	genes	SURROID	gRNA	target	REFs
Beta-thalassemia	BCL11A	11182	GATGGCTGAAAAGCGATACA	GATGGCTGAAAAGCGATACAGGG	doi: 10.1016/j.ejphar.2019.04.042
Beta-thalassemia	BCL11A	11183	AATTTGTATGCCATGCCGTG	AATTTGTATGCCATGCCGTGTGG	doi: 10.1016/j.ejphar.2019.04.042
Beta-thalassemia	BCL11A	11184	ATCGGTGGCCGTTTGCCCAG	ATCGGTGGCCGTTTGCCCAGGGG	doi: 10.1038/s41591-019-0401-y
Beta-thalassemia	BCL11A	11185	CACAGGCTCCAGGAAGGGTT	CACAGGCTCCAGGAAGGGTTTGG	doi: 10.1038/s41591-019-0401-y
Beta-thalassemia	BCL11A	11186	ATCAGAGGCCAAACCCTTCC	ATCAGAGGCCAAACCCTTCCTGG	doi: 10.1038/s41591-019-0401-y
Beta-thalassemia	BCL11A	11187	ACTCTTAGACATAACACACC	ACTCTTAGACATAACACACCAGG	doi: 10.1038/s41591-019-0401-y
Beta-thalassemia	BCL11A	11188	TTTATCACAGGCTCCAGGAA	TTTATCACAGGCTCCAGGAAGGG	doi: 10.1038/s41591-019-0401-y
Beta-thalassemia	HBB	11176	CTTGCCCCACAGGGCAGTAA	CTTGCCCCACAGGGCAGTAACGG	doi: 10.1038/nature20134
Beta-thalassemia	HBB	11177	GTAACGGCAGACTTCTCCTC	GTAACGGCAGACTTCTCCTCAGG	doi.org/10.1016/j.omtn.2019.05.025.
Beta-thalassemia	HBB	11178	AGTCTGCCGTTACTGCCCTG	AGTCTGCCGTTACTGCCCTGTGG	doi.org/10.1016/j.omtn.2019.05.025.
Beta-thalassemia	HBB	11179	AAGGTGAACGTGGATGAAGT	AAGGTGAACGTGGATGAAGTTGG	doi.org/10.1016/j.omtn.2019.05.025.
Beta-thalassemia	HBB	11181	CGTTACTGCCCTGTGGGGCA	CGTTACTGCCCTGTGGGGCAAGG	doi:10.1126/scitranslmed.aaf9336.
Beta-thalassemia	HBB	11189	AGCCAGTGCCAGAAGAGCCA	AGCCAGTGCCAGAAGAGCCAAGG	doi: 10.1186/s40348-018-0086-1.
Beta-thalassemia	HBB	11192	GTCTGCCGTTACTGCCCTGT	GTCTGCCGTTACTGCCCTGTGGG	doi: 10.1038/srep30422.
Beta-thalassemia	KLF1	11193	TCTTGCGCGCCCACGAACGT	TCTTGCGCGCCCACGAACGTCGG	doi: 10.1002/jgm.2928.
Beta-thalassemia	KLF1	11194	CGGCTGGAGATTCGCGCGCT	CGGCTGGAGATTCGCGCGCTCGG	doi: 10.1002/jgm.2928.
Cancers (Breast cancer)	SHCBP1	11258	TGTAGCTACCGTGATAAACC	TGTAGCTACCGTGATAAACCAGG	https://doi.org/10.1016/j.gene.2016.04.046
Cancers (Colon cancer)	KRT20	11256	TTAAATATTCTAGTGCTCAC	TTAAATATTCTAGTGCTCACTGG	https://doi.org/10.1038/nature22081
Cancers (Colon cancer)	KRT20	11257	AATTACAGAGTCTGATAAAT	AATTACAGAGTCTGATAAATAGG	https://doi.org/10.1038/nature22081
Cancers (Colon cancer)	LGR5	11254	GTAATTAATAAGAAGAGCTG	GTAATTAATAAGAAGAGCTGAGG	https://doi.org/10.1038/nature22081
Cancers (Colon cancer)	LGR5	11255	TGTCTCTAATTAATATGTGA	TGTCTCTAATTAATATGTGAAGG	https://doi.org/10.1038/nature22081
Cancers (Colon cancer)	PROM1	11248	GCAACAGGGAGCCGAGTACG	GCAACAGGGAGCCGAGTACGAGG	doi: 10.1371/journal.pone.0220860
Cancers (Lung adenocarcinoma)	NLUCAT1	11235	GTGTAGATTGAACGTGTACA	GTGTAGATTGAACGTGTACATGG	doi: 10.1038/s41388-019-0935-y
Duchenne Muscular Dystrophy (DMD)	DMD	11195	GTACAAGGACCGACAAGGGT	GTACAAGGACCGACAAGGGTAGG	doi: 10.1126/sciadv.aav4324
Duchenne Muscular Dystrophy (DMD)	DMD	11196	TATGTGTTACCTACCCTTGT	TATGTGTTACCTACCCTTGTCGG	doi: 10.1126/sciadv.aav4324
Duchenne Muscular Dystrophy (DMD)	DMD	11197	TGGTATCTTACAGGAACTCC	TGGTATCTTACAGGAACTCCAGG	doi: 10.1016/j.stemcr.2014.10.013
Duchenne Muscular Dystrophy (DMD)	DMD	11198	TCCTACTCAGACTGTTACTC	TCCTACTCAGACTGTTACTCTGG	doi: 10.1038/ncomms7244.
Duchenne Muscular Dystrophy (DMD)	DMD	11199	GCCTTCTTTATCCCCTATCG	GCCTTCTTTATCCCCTATCGAGG	doi: 10.1038/ncomms7244.
Duchenne Muscular Dystrophy (DMD)	DMD	11200	TAGAAGATCTGAGCTCTGAG	TAGAAGATCTGAGCTCTGAGTGG	doi: 10.1038/mtna.2015.58
Duchenne Muscular Dystrophy (DMD)	DMD	11201	AGATCTGAGCTCTGAGTGGA	AGATCTGAGCTCTGAGTGGAAGG	doi: 10.1038/mtna.2015.58
Duchenne Muscular Dystrophy (DMD)	DMD	11202	AAGCAGCCTGACCTAGCTCC	AAGCAGCCTGACCTAGCTCCTGG	doi: 10.1038/mtna.2015.58
Duchenne Muscular Dystrophy (DMD)	DMD	11203	GTGGCAGACAAATGTAGATG	GTGGCAGACAAATGTAGATGTGG	doi: 10.1038/mtna.2015.58
Duchenne Muscular Dystrophy (DMD)	DMD	11204	CAGAGAATATCAATGCCTCT	CAGAGAATATCAATGCCTCTTGG	doi: 10.1038/mtna.2015.58
Duchenne Muscular Dystrophy (DMD)	DMD	11205	TGGCCAAAGACCTCCGCCAG	TGGCCAAAGACCTCCGCCAGTGG	doi: 10.1038/mtna.2015.58
Duchenne Muscular Dystrophy (DMD)	DMD	11206	ATAATCCCGGAGAAGTTTCA	ATAATCCCGGAGAAGTTTCAGGG	doi: 10.1038/mtna.2015.58
Duchenne Muscular Dystrophy (DMD)	DMD	11207	ACCAGAGTAACAGTCTGAGT	ACCAGAGTAACAGTCTGAGTAGG	doi: 10.1093/nar/gkv1540
Duchenne Muscular Dystrophy (DMD)	DMD	11208	ATTCTTTCAACTAGAATAAA	ATTCTTTCAACTAGAATAAAAGG	doi: 10.1093/nar/gkv1540
Duchenne Muscular Dystrophy (DMD)	DMD	11209	GATGGCAAAGCAAACTCCTG	GATGGCAAAGCAAACTCCTGTGG	doi: 10.1093/nar/gkv1540
Duchenne Muscular Dystrophy (DMD)	DMD	11210	GTAATCTGGATATAGTTGGC	GTAATCTGGATATAGTTGGCTGG	doi: 10.1093/nar/gkv1540
Duchenne Muscular Dystrophy (DMD)	DMD	11211	GGTACACAATAGGTACGGAA	GGTACACAATAGGTACGGAATGG	doi: 10.1093/nar/gkv1540
Duchenne Muscular Dystrophy (DMD)	DMD	11212	GTGGTGTCCTTTGAATATGC	GTGGTGTCCTTTGAATATGCAGG	doi: 10.1016/j.stem.2016.01.021
Duchenne Muscular Dystrophy (DMD)	DMD	11213	AGATTGTCCAGGATATAATT	AGATTGTCCAGGATATAATTTGG	doi: 10.1016/j.stem.2016.01.021
Duchenne Muscular Dystrophy (DMD)	DMD	11214	TTAGCAACCAAATTATATCC	TTAGCAACCAAATTATATCCTGG	doi: 10.1016/j.stem.2016.01.021
Duchenne Muscular Dystrophy (DMD)	DMD	11215	GTTGAAATTAAACTACACAC	GTTGAAATTAAACTACACACTGG	doi: 10.1016/j.stem.2016.01.021
Duchenne Muscular Dystrophy (DMD)	DMD	11216	ATCTTTACCTGCATATTCAA	ATCTTTACCTGCATATTCAAAGG	doi: 10.1016/j.stem.2016.01.021
Duchenne Muscular Dystrophy (DMD)	DMD	11217	CATTCCTGGGAGTCTGTCAT	CATTCCTGGGAGTCTGTCATGGG	doi: 10.1016/j.stem.2016.01.021
Duchenne Muscular Dystrophy (DMD)	DMD	11218	TGTATGATGCTATAATACCA	TGTATGATGCTATAATACCAAGG	doi: 10.1016/j.stem.2016.01.021
Duchenne Muscular Dystrophy (DMD)	DMD	11219	GTGGAAAGTACATAGGACCT	GTGGAAAGTACATAGGACCTTGG	doi: 10.1016/j.stem.2016.01.021
Duchenne Muscular Dystrophy (DMD)	DMD	11220	TCTTATCATAACTCTTACCA	TCTTATCATAACTCTTACCAAGG	doi: 10.1016/j.stem.2016.01.021
Duchenne Muscular Dystrophy (DMD)	DMD	11221	GTTACATACAGGCTAGGGAG	GTTACATACAGGCTAGGGAGTGG	doi: 10.1038/srep37051
Duchenne Muscular Dystrophy (DMD)	DMD	11222	ATATACTTGTGGCTAGTTAG	ATATACTTGTGGCTAGTTAGTGG	doi: 10.3233/JND-170218
Duchenne Muscular Dystrophy (DMD)	DMD	11223	AAAAACTGGAGCTAACCGAG	AAAAACTGGAGCTAACCGAGAGG	doi: 10.3233/JND-170218
Duchenne Muscular Dystrophy (DMD)	DMD	11224	TGTCCTACAAATCAATTAGT	TGTCCTACAAATCAATTAGTTGG	doi: 10.3233/JND-170218
Duchenne Muscular Dystrophy (DMD)	DMD	11225	CAGGGAAAAAAGCACCCTCT	CAGGGAAAAAAGCACCCTCTCGG	doi: 10.3233/JND-170218
Duchenne Muscular Dystrophy (DMD)	DMD	11226	AATTAATCTGCCGAAGATGA	AATTAATCTGCCGAAGATGACGG	doi: 10.1172/jci.insight.95918
Duchenne Muscular Dystrophy (DMD)	DMD	11227	TGCAGTATGCTCCATCCATA	TGCAGTATGCTCCATCCATAGGG	doi: 10.1172/jci.insight.95918
Duchenne Muscular Dystrophy (DMD)	DMD	11228	AAGAGTTACTCATCTATATA	AAGAGTTACTCATCTATATATGG	doi: 10.1172/jci.insight.95918
Duchenne Muscular Dystrophy (DMD)	DMD	11229	AAACAAACCAGCTCTTCACG	AAACAAACCAGCTCTTCACGAGG	doi: 10.1172/jci.insight.95918
Duchenne Muscular Dystrophy (DMD)	DMD	11230	CATTGGCTTTGATTTCCCTA	CATTGGCTTTGATTTCCCTAGGG	doi: 10.1038/s41598-017-17180-w
Duchenne Muscular Dystrophy (DMD)	DMD	11231	TAAGGGATATTTGTTCTTAC	TAAGGGATATTTGTTCTTACAGG	doi: 10.1126/sciadv.aap9004
Duchenne Muscular Dystrophy (DMD)	DMD	11232	CTATTCCAGTCAAATAGGTC	CTATTCCAGTCAAATAGGTCTGG	doi: 10.1126/sciadv.aap9004
Duchenne Muscular Dystrophy (DMD)	DMD	11233	TCAAATGCACTATTCTCAAC	TCAAATGCACTATTCTCAACAGG	doi: 10.1126/sciadv.aap9004
Duchenne Muscular Dystrophy (DMD)	DMD	11234	TGAACATTTGGTCCTTTGCA	TGAACATTTGGTCCTTTGCAGGG	doi: 10.1126/sciadv.aap9004
HIV therapy	CCR5	11156	CATACAGTCAGTATCAATTC	CATACAGTCAGTATCAATTCTGG	doi:10. 1073/pnas.1407473111
HIV therapy	CCR5	11157	TGACATCAATTATTATACAT	TGACATCAATTATTATACATCGG	doi:10.1038/nbt.2507
HIV therapy	CCR5	11161	GCTGCCGCCCAGTGGGACTT	GCTGCCGCCCAGTGGGACTTTGG	doi: 10.1099/vir.0.000139
HIV therapy	CCR5	11162	GGCAGCATAGTGAGCCCAGA	GGCAGCATAGTGAGCCCAGAAGG	doi: 10.1099/vir.0.000139
HIV therapy	CCR5	11163	TCAGTTTACACCCGATCCAC	TCAGTTTACACCCGATCCACTGG	doi: 10.1099/vir.0.000139
HIV therapy	CCR5	11164	GTAAACTGAGCTTGCTCGCT	GTAAACTGAGCTTGCTCGCTCGG	doi: 10.1099/vir.0.000139
HIV therapy	CCR5	11165	TCACTATGCTGCCGCCCAGT	TCACTATGCTGCCGCCCAGTGGG	doi: 10.1099/vir.0.000139
HIV therapy	CCR5	11166	TCTGAACTTCTCCCCGACAA	TCTGAACTTCTCCCCGACAAAGG	doi: 10.1099/vir.0.000139
HIV therapy	CCR5	11167	TCATCCTCCTGACAATCGAT	TCATCCTCCTGACAATCGATAGG	doi: 10.1099/vir.0.000139
HIV therapy	CCR5	11168	CAATGTGTCAACTCTTGACA	CAATGTGTCAACTCTTGACAGGG	doi: 10.1099/vir.0.000139
HIV therapy	CCR5	11169	ATAATTGCAGTAGCTCTAAC	ATAATTGCAGTAGCTCTAACAGG	doi: 10.1099/vir.0.000139
HIV therapy	CCR5	11170	GCTTGTGACACGGACTCAAG	GCTTGTGACACGGACTCAAGTGG	doi: 10.1371/journal.pone.0115987
HIV therapy	CCR5	11171	GGTCCTGCCGCTGCTTGTCA	GGTCCTGCCGCTGCTTGTCATGG	doi: 10.1371/journal.pone.0115987
HIV therapy	CCR5	11173	TAATAATTGATGTCATAGAT	TAATAATTGATGTCATAGATTGG	doi: 10.1590/1678-4685-GMB-2017-0065
HIV therapy	CCR5	11174	CAGAATTGATACTGACTGTA	CAGAATTGATACTGACTGTATGG	doi: 10.1016/j.omtn.2018.05.012
HIV therapy	CCR5	11175	AGATGACTATCTTTAATGTC	AGATGACTATCTTTAATGTCTGG	doi: 10.1016/j.omtn.2018.05.012
HIV therapy	CXCR4	11158	GAAGAAACTGAGAAGCATGA	GAAGAAACTGAGAAGCATGACGG	DOI: 10.1038/srep15577
HIV therapy	CXCR4	11159	GCTTCTACCCCAATGACTTG	GCTTCTACCCCAATGACTTGTGG	DOI: 10.1038/srep15577
HIV therapy	CXCR4	11160	GTTCCAGTTTCAGCACATCA	GTTCCAGTTTCAGCACATCATGG	DOI: 10.1038/srep15577
HIV therapy	CXCR4	11172	AGTCGGGAATAGTCAGCAGG	AGTCGGGAATAGTCAGCAGGAGG	doi: 10.1089/hum.2017.032.
Huntington's disease	HTT	11146	GTCTGGGACGCAAGGCGCCG	GTCTGGGACGCAAGGCGCCGTGG	doi.org/10.1016/j.ymthe.2016.11.010
Huntington's disease	HTT	11147	GGCCTTCATCAGCTTTTCCA	GGCCTTCATCAGCTTTTCCAGGG	doi: 10.1172/JCI92087
Huntington's disease	HTT	11148	GGCTGAGGAAGCTGAGGAGG	GGCTGAGGAAGCTGAGGAGGCGG	doi: 10.1172/JCI92087
Huntington's disease	HTT	11149	GTCGATGATCTCTTTAACCG	GTCGATGATCTCTTTAACCGTGG	doi: 10.1093/hmg/ddw286
Huntington's disease	HTT	11150	GCCTCCGGGGACTGCCGTGC	GCCTCCGGGGACTGCCGTGCCGG	doi:10.3390/ijms18040754
Huntington's disease	HTT	11151	GACCCTGGAAAAGCTGATGA	GACCCTGGAAAAGCTGATGAAGG	doi: 10.1016/j.stemcr.2017.01.022
Huntington's disease	HTT	11152	CGCCATGGCGGTCTCCCGCC	CGCCATGGCGGTCTCCCGCCCGG	doi: 10.1016/j.stemcr.2017.01.022
Huntington's disease	HTT	11153	CTGCTGCTGCTGCTGCTGGA	CTGCTGCTGCTGCTGCTGGAAGG	doi: 10.3389/fnins.2018.00075
Huntington's disease	HTT	11154	GAAGGACTTGAGGGACTCGA	GAAGGACTTGAGGGACTCGAAGG	doi: 10.3389/fnins.2018.00075
Huntington's disease	HTT	11155	GCTTCCTCAGCCGCCGCCGC	GCTTCCTCAGCCGCCGCCGCAGG	doi: 10.3389/fnins.2018.00075
Immunotherapy	B2M	11241	CGCGAGCACAGCTAAGGCCA	CGCGAGCACAGCTAAGGCCACGG	doi: 10.1158/1078-0432.CCR-16-1300
Immunotherapy	FAS	11244	GAGGGTCCAGATGCCCAGCA	GAGGGTCCAGATGCCCAGCATGG	doi: 10.18632/oncotarget.15218
Immunotherapy	PDCD1	11236	CGACTGGCCAGGGCGCCTGT	CGACTGGCCAGGGCGCCTGTGGG	doi: 10.1038/s41598-017-00462-8
Immunotherapy	PDCD1	11242	GGCCAGGATGGTTCTTAGGT	GGCCAGGATGGTTCTTAGGTAGG	doi: 10.1158/1078-0432.CCR-16-1300
Immunotherapy	PDCD1	11243	GGCGCCCTGGCCAGTCGTCT	GGCGCCCTGGCCAGTCGTCTGGG	doi: 10.1038/s41598-018-23803-7
Immunotherapy	PDCD1	11250	GCGTGACTTCCACATGAGCG	GCGTGACTTCCACATGAGCGTGG	doi: 10.1038/srep20070.
Immunotherapy	PDCD1	11251	GCAGTTGTGTGACACGGAAG	GCAGTTGTGTGACACGGAAGCGG	doi: 10.1038/srep20070.
Immunotherapy	PDCD1	11252	GACAGCGGCACCTACCTCTG	GACAGCGGCACCTACCTCTGTGG	https://doi.org/10.1038/srep20070
Immunotherapy	PDCD1	11253	GGGCCCTGACCACGCTCATG	GGGCCCTGACCACGCTCATGTGG	https://doi.org/10.1038/srep20070
Immunotherapy	TNFRSF10A	11245	TCGTGGTTCAATCCTCCCCG	TCGTGGTTCAATCCTCCCCGCGG	DOI: 10.1126/scitranslmed.aao3240
Immunotherapy	TNFRSF10B	11247	AGAACGCCCCGGCCGCTTCG	AGAACGCCCCGGCCGCTTCGGGG	DOI: 10.1126/scitranslmed.aao3240
Immunotherapy	TRAC	11237	AGAGTCTCTCAGCTGGTACA	AGAGTCTCTCAGCTGGTACACGG	doi: 10.1158/1078-0432.CCR-16-1300
Immunotherapy	TRAC	11238	TGTGCTAGACATGAGGTCTA	TGTGCTAGACATGAGGTCTATGG	doi: 10.1158/1078-0432.CCR-16-1300
Immunotherapy	TRBC2	11239	GCAGTATCTGGAGTCATTGA	GCAGTATCTGGAGTCATTGAGGG	doi: 10.1158/1078-0432.CCR-16-1300
Immunotherapy	TRBC2	11240	GGAGAATGACGAGTGGACCC	GGAGAATGACGAGTGGACCCAGG	doi: 10.1158/1078-0432.CCR-16-1300
LCA	CEP290	11145	GGAGTCACATGGGAGTCACA	GGAGTCACATGGGAGTCACAGGG	doi: 10.1016/j.ymthe.2016.12.006
X-linked SCID	IL2RG	11190	TGGTAATGATGGCTTCAACA	TGGTAATGATGGCTTCAACATGG	doi: 10.1038/nature20134

## Sheet: Data 3.2 LibB oligos
Data 3.2 List of Oligos synthesized.
OligoID	Oligo sequences (5'-3')
1	ACCACGTCTCACACCGGGAGTCACATGGGAGTCACAGTTTTAGAGCTAGAAATAGCAAGTTAAAATAAGGCTAGTCCGTTATCAACTTGAAAAACTGGCACCGAGTCGGTGCTTTTTTCTGTTGGCACAGAATCACAGGGGAGGCACAGGGAGGAGTTTGGAGACGACGG
4	ACCACGTCTCACACCGGGAGTCACATGGGAGTCACAGTTTTAGAGCTAGAAATAGCAAGTTAAAATAAGGCTAGTCCGTTATCAACTTGAAAAACTGGCACCGAGTCGGTGCTTTTTTCTTACCGAACGGAGGCACACGGGCCTCACAGGGACAGGTTTGGAGACGACGG
6	ACCACGTCTCACACCGGGAGTCACATGGGAGTCACAGTTTTAGAGCTAGAAATAGCAAGTTAAAATAAGGCTAGTCCGTTATCAACTTGAAAAACTGGCACCGAGTCGGTGCTTTTTTCTTACCGTACGGAGGGACATGGAGGTCACAGGGCATGGTTTGGAGACGACGG
7	ACCACGTCTCACACCGGGAGTCACATGGGAGTCACAGTTTTAGAGCTAGAAATAGCAAGTTAAAATAAGGCTAGTCCGTTATCAACTTGAAAAACTGGCACCGAGTCGGTGCTTTTTTCTTAGAGCACGGATTCACTTGGGAGCCACTTGGAACCGTTTGGAGACGACGG
8	ACCACGTCTCACACCGGGAGTCACATGGGAGTCACAGTTTTAGAGCTAGAAATAGCAAGTTAAAATAAGGCTAGTCCGTTATCAACTTGAAAAACTGGCACCGAGTCGGTGCTTTTTTCTTATTATACGGAGACACAGGTGAGTCACCGGGACCTGTTTGGAGACGACGG
15	ACCACGTCTCACACCGGGAGTCACATGGGAGTCACAGTTTTAGAGCTAGAAATAGCAAGTTAAAATAAGGCTAGTCCGTTATCAACTTGAAAAACTGGCACCGAGTCGGTGCTTTTTTCTTAACACACAGAGCCACATGGGAACCACATGGTAGGGTTTGGAGACGACGG
17	ACCACGTCTCACACCGGGAGTCACATGGGAGTCACAGTTTTAGAGCTAGAAATAGCAAGTTAAAATAAGGCTAGTCCGTTATCAACTTGAAAAACTGGCACCGAGTCGGTGCTTTTTTCTTAACTAACGAAGTCACATGGGGGTCCCACGGTCACGTTTGGAGACGACGG
18	ACCACGTCTCACACCGGGAGTCACATGGGAGTCACAGTTTTAGAGCTAGAAATAGCAAGTTAAAATAAGGCTAGTCCGTTATCAACTTGAAAAACTGGCACCGAGTCGGTGCTTTTTTCTTAAGACACGCAGTCACATGGAAGCCAGAAGGCAATGTTTGGAGACGACGG
19	ACCACGTCTCACACCGGGAGTCACATGGGAGTCACAGTTTTAGAGCTAGAAATAGCAAGTTAAAATAAGGCTAGTCCGTTATCAACTTGAAAAACTGGCACCGAGTCGGTGCTTTTTTCTTAAGATACGCAGTCTCATGGGACTCAGATGGTCTAGTTTGGAGACGACGG
20	ACCACGTCTCACACCGGGAGTCACATGGGAGTCACAGTTTTAGAGCTAGAAATAGCAAGTTAAAATAAGGCTAGTCCGTTATCAACTTGAAAAACTGGCACCGAGTCGGTGCTTTTTTCTTAAGTTACGGAGACACAGAGAAGTCACAAGGCTTAGTTTGGAGACGACGG
21	ACCACGTCTCACACCGGGAGTCACATGGGAGTCACAGTTTTAGAGCTAGAAATAGCAAGTTAAAATAAGGCTAGTCCGTTATCAACTTGAAAAACTGGCACCGAGTCGGTGCTTTTTTCTTAATAGACGGAGACACATGGAAATCTCATGGTATGGTTTGGAGACGACGG
22	ACCACGTCTCACACCGGGAGTCACATGGGAGTCACAGTTTTAGAGCTAGAAATAGCAAGTTAAAATAAGGCTAGTCCGTTATCAACTTGAAAAACTGGCACCGAGTCGGTGCTTTTTTCTTAATATACGGAGACACATGGGAATCAATAGGCTGGGTTTGGAGACGACGG
23	ACCACGTCTCACACCGGGAGTCACATGGGAGTCACAGTTTTAGAGCTAGAAATAGCAAGTTAAAATAAGGCTAGTCCGTTATCAACTTGAAAAACTGGCACCGAGTCGGTGCTTTTTTCTTAATCGACGGAGACACATGGGAGTGAGCCGGTGGGGTTTGGAGACGACGG
24	ACCACGTCTCACACCGGGAGTCACATGGGAGTCACAGTTTTAGAGCTAGAAATAGCAAGTTAAAATAAGGCTAGTCCGTTATCAACTTGAAAAACTGGCACCGAGTCGGTGCTTTTTTCTTAATCTACGGAGACAGATGGGAGGCAGATGGCAACGTTTGGAGACGACGG
25	ACCACGTCTCACACCGGGAGTCACATGGGAGTCACAGTTTTAGAGCTAGAAATAGCAAGTTAAAATAAGGCTAGTCCGTTATCAACTTGAAAAACTGGCACCGAGTCGGTGCTTTTTTCTTAATGGACGGAGCAGCAGGGGAGTCACAAGGTTGAGTTTGGAGACGACGG
26	ACCACGTCTCACACCGGGAGTCACATGGGAGTCACAGTTTTAGAGCTAGAAATAGCAAGTTAAAATAAGGCTAGTCCGTTATCAACTTGAAAAACTGGCACCGAGTCGGTGCTTTTTTCTTAATGTACGGAGCCACATGGCAGTTTCATGGACTTGTTTGGAGACGACGG
27	ACCACGTCTCACACCGGGAGTCACATGGGAGTCACAGTTTTAGAGCTAGAAATAGCAAGTTAAAATAAGGCTAGTCCGTTATCAACTTGAAAAACTGGCACCGAGTCGGTGCTTTTTTCTTAATTAACGGAGCCACATGGCTGTCCCAGGGCCTGGTTTGGAGACGACGG
28	ACCACGTCTCACACCGGGAGTCACATGGGAGTCACAGTTTTAGAGCTAGAAATAGCAAGTTAAAATAAGGCTAGTCCGTTATCAACTTGAAAAACTGGCACCGAGTCGGTGCTTTTTTCTTACACTACGGAGCCAGACGGGAGGCACAGGGAGCAGTTTGGAGACGACGG
29	ACCACGTCTCACACCGGGAGTCACATGGGAGTCACAGTTTTAGAGCTAGAAATAGCAAGTTAAAATAAGGCTAGTCCGTTATCAACTTGAAAAACTGGCACCGAGTCGGTGCTTTTTTCTTACATAACGGAGCTACAAGGGAGCCACAGGGGAGCGTTTGGAGACGACGG
31	ACCACGTCTCACACCGGGAGTCACATGGGAGTCACAGTTTTAGAGCTAGAAATAGCAAGTTAAAATAAGGCTAGTCCGTTATCAACTTGAAAAACTGGCACCGAGTCGGTGCTTTTTTCTTACCTTACGGAGGTACAGGGGAGGCACAGGGGAGAGTTTGGAGACGACGG
32	ACCACGTCTCACACCGGGAGTCACATGGGAGTCACAGTTTTAGAGCTAGAAATAGCAAGTTAAAATAAGGCTAGTCCGTTATCAACTTGAAAAACTGGCACCGAGTCGGTGCTTTTTTCTTACGATACGGAGTATCCTGGGATTCACAGGGTTCAGTTTGGAGACGACGG
33	ACCACGTCTCACACCGGGAGTCACATGGGAGTCACAGTTTTAGAGCTAGAAATAGCAAGTTAAAATAAGGCTAGTCCGTTATCAACTTGAAAAACTGGCACCGAGTCGGTGCTTTTTTCTTACGCTACGGAGTCACTTTGGAGTCTCTGGGTTTGGTTTGGAGACGACGG
34	ACCACGTCTCACACCGGGAGTCACATGGGAGTCACAGTTTTAGAGCTAGAAATAGCAAGTTAAAATAAGGCTAGTCCGTTATCAACTTGAAAAACTGGCACCGAGTCGGTGCTTTTTTCTTACTAGACGGAGTCCCATGGGAACCACTTGGCACTGTTTGGAGACGACGG
35	ACCACGTCTCACACCGGGAGTCACATGGGAGTCACAGTTTTAGAGCTAGAAATAGCAAGTTAAAATAAGGCTAGTCCGTTATCAACTTGAAAAACTGGCACCGAGTCGGTGCTTTTTTCTTACTGCACGGAGTCTCCGGGGAGTCTCAGGGGTCCGTTTGGAGACGACGG
37	ACCACGTCTCACACCGGGAGTCACATGGGAGTCACAGTTTTAGAGCTAGAAATAGCAAGTTAAAATAAGGCTAGTCCGTTATCAACTTGAAAAACTGGCACCGAGTCGGTGCTTTTTTCTTAGAAGACGGAGTGGGATGGCAGTCACATGGGTTTGTTTGGAGACGACGG
38	ACCACGTCTCACACCGGGAGTCACATGGGAGTCACAGTTTTAGAGCTAGAAATAGCAAGTTAAAATAAGGCTAGTCCGTTATCAACTTGAAAAACTGGCACCGAGTCGGTGCTTTTTTCTTAGACGACGGATACACATTGGAATCACATGGAGAGGTTTGGAGACGACGG
39	ACCACGTCTCACACCGGGAGTCACATGGGAGTCACAGTTTTAGAGCTAGAAATAGCAAGTTAAAATAAGGCTAGTCCGTTATCAACTTGAAAAACTGGCACCGAGTCGGTGCTTTTTTCTTAGATGACGGGGTCACTTGAAAGTCACAGGGCTGGGTTTGGAGACGACGG
40	ACCACGTCTCACACCGGGAGTCACATGGGAGTCACAGTTTTAGAGCTAGAAATAGCAAGTTAAAATAAGGCTAGTCCGTTATCAACTTGAAAAACTGGCACCGAGTCGGTGCTTTTTTCTTAGCAGACGGGGTCACTTGTGAGTAACACGGAGTGGTTTGGAGACGACGG
41	ACCACGTCTCACACCGGGAGTCACATGGGAGTCACAGTTTTAGAGCTAGAAATAGCAAGTTAAAATAAGGCTAGTCCGTTATCAACTTGAAAAACTGGCACCGAGTCGGTGCTTTTTTCTTAGCCAACGGTGTCACATGGTATTCCCACGGCCCCGTTTGGAGACGACGG
42	ACCACGTCTCACACCGGGAGTCACATGGGAGTCACAGTTTTAGAGCTAGAAATAGCAAGTTAAAATAAGGCTAGTCCGTTATCAACTTGAAAAACTGGCACCGAGTCGGTGCTTTTTTCTTAGCCGACGGTTGCACATGGGAGTCACCTGGGGAGGTTTGGAGACGACGG
44	ACCACGTCTCACACCGGGAGTCACATGGGAGTCACAGTTTTAGAGCTAGAAATAGCAAGTTAAAATAAGGCTAGTCCGTTATCAACTTGAAAAACTGGCACCGAGTCGGTGCTTTTTTCTTAGCGGACGTGGTAGCATGGGAGTCACATGGCTAGGTTTGGAGACGACGG
45	ACCACGTCTCACACCGGGAGTCACATGGGAGTCACAGTTTTAGAGCTAGAAATAGCAAGTTAAAATAAGGCTAGTCCGTTATCAACTTGAAAAACTGGCACCGAGTCGGTGCTTTTTTCTTAGCTCACTGAGTCAGATGGGAGCCAAAAGGAAGTGTTTGGAGACGACGG
46	ACCACGTCTCACACCGGGAGTCACATGGGAGTCACAGTTTTAGAGCTAGAAATAGCAAGTTAAAATAAGGCTAGTCCGTTATCAACTTGAAAAACTGGCACCGAGTCGGTGCTTTTTTCTTAGGACACTGAGTCTCATGGGAGGCACCTGGCCCCGTTTGGAGACGACGG
47	ACCACGTCTCACACCGGGAGTCACATGGGAGTCACAGTTTTAGAGCTAGAAATAGCAAGTTAAAATAAGGCTAGTCCGTTATCAACTTGAAAAACTGGCACCGAGTCGGTGCTTTTTTCTTAGGTAACAGAGTGGCATGGGAGTCAGATGGATAGGTTTGGAGACGACGG
48	ACCACGTCTCACACCGGGAGTCACATGGGAGTCACAGTTTTAGAGCTAGAAATAGCAAGTTAAAATAAGGCTAGTCCGTTATCAACTTGAAAAACTGGCACCGAGTCGGTGCTTTTTTCTTAGGTTACCAAATGACATGGGAGTCACAGGGTTTGGTTTGGAGACGACGG
49	ACCACGTCTCACACCGGGAGTCACATGGGAGTCACAGTTTTAGAGCTAGAAATAGCAAGTTAAAATAAGGCTAGTCCGTTATCAACTTGAAAAACTGGCACCGAGTCGGTGCTTTTTTCTTAGTACACCAAGTCCCATGGGAGTGACATGGAGGCGTTTGGAGACGACGG
50	ACCACGTCTCACACCGGGAGTCACATGGGAGTCACAGTTTTAGAGCTAGAAATAGCAAGTTAAAATAAGGCTAGTCCGTTATCAACTTGAAAAACTGGCACCGAGTCGGTGCTTTTTTCTTAGTGAACGAAGTCACAAAGGAGTCATATGGATAAGTTTGGAGACGACGG
51	ACCACGTCTCACACCGGGAGTCACATGGGAGTCACAGTTTTAGAGCTAGAAATAGCAAGTTAAAATAAGGCTAGTCCGTTATCAACTTGAAAAACTGGCACCGAGTCGGTGCTTTTTTCTTATAATACGACGTCACATGGGAGCCAGAGGGGCAGGTTTGGAGACGACGG
52	ACCACGTCTCACACCGGGAGTCACATGGGAGTCACAGTTTTAGAGCTAGAAATAGCAAGTTAAAATAAGGCTAGTCCGTTATCAACTTGAAAAACTGGCACCGAGTCGGTGCTTTTTTCTTATATTACGCAGTCACAGAGAAGTCACAAGGCACAGTTTGGAGACGACGG
53	ACCACGTCTCACACCGGGAGTCACATGGGAGTCACAGTTTTAGAGCTAGAAATAGCAAGTTAAAATAAGGCTAGTCCGTTATCAACTTGAAAAACTGGCACCGAGTCGGTGCTTTTTTCTTATCCAACGCAGTCTCATGGGACTCACTGGGCGTTGTTTGGAGACGACGG
54	ACCACGTCTCACACCGGGAGTCACATGGGAGTCACAGTTTTAGAGCTAGAAATAGCAAGTTAAAATAAGGCTAGTCCGTTATCAACTTGAAAAACTGGCACCGAGTCGGTGCTTTTTTCTTATCTAACGCTGTCACCTGGGAGTCACCAGGACTCGTTTGGAGACGACGG
55	ACCACGTCTCACACCGGGAGTCACATGGGAGTCACAGTTTTAGAGCTAGAAATAGCAAGTTAAAATAAGGCTAGTCCGTTATCAACTTGAAAAACTGGCACCGAGTCGGTGCTTTTTTCTTATCTGACGGAATCACAGAGAAGTCACATGGGGCAGTTTGGAGACGACGG
56	ACCACGTCTCACACCGGGAGTCACATGGGAGTCACAGTTTTAGAGCTAGAAATAGCAAGTTAAAATAAGGCTAGTCCGTTATCAACTTGAAAAACTGGCACCGAGTCGGTGCTTTTTTCTTATGACACGGAATCACAGGGGACTCAGATGGGGCCGTTTGGAGACGACGG
57	ACCACGTCTCACACCGGGAGTCACATGGGAGTCACAGTTTTAGAGCTAGAAATAGCAAGTTAAAATAAGGCTAGTCCGTTATCAACTTGAAAAACTGGCACCGAGTCGGTGCTTTTTTCTTATGCGACGGACACACATGGGAGTAAAATGGTGGGGTTTGGAGACGACGG
58	ACCACGTCTCACACCGGGAGTCACATGGGAGTCACAGTTTTAGAGCTAGAAATAGCAAGTTAAAATAAGGCTAGTCCGTTATCAACTTGAAAAACTGGCACCGAGTCGGTGCTTTTTTCTTATGGCACGGACTCATATGGGAGGCGCAGGGCCCTGTTTGGAGACGACGG
59	ACCACGTCTCACACCGGGAGTCACATGGGAGTCACAGTTTTAGAGCTAGAAATAGCAAGTTAAAATAAGGCTAGTCCGTTATCAACTTGAAAAACTGGCACCGAGTCGGTGCTTTTTTCTTATTAGACGGAGACAAATGAGAGTCCCATGGTTTAGTTTGGAGACGACGG
60	ACCACGTCTCACACCGGGAGTCACATGGGAGTCACAGTTTTAGAGCTAGAAATAGCAAGTTAAAATAAGGCTAGTCCGTTATCAACTTGAAAAACTGGCACCGAGTCGGTGCTTTTTTCTTATTCCACGGAGACACCTGGGAGCCAGAGGGTTTGGTTTGGAGACGACGG
61	ACCACGTCTCACACCGGGAGTCACATGGGAGTCACAGTTTTAGAGCTAGAAATAGCAAGTTAAAATAAGGCTAGTCCGTTATCAACTTGAAAAACTGGCACCGAGTCGGTGCTTTTTTCTTATTGCACGGAGCAACATGGGACTCACACGGAAGCGTTTGGAGACGACGG
62	ACCACGTCTCACACCGGGAGTCACATGGGAGTCACAGTTTTAGAGCTAGAAATAGCAAGTTAAAATAAGGCTAGTCCGTTATCAACTTGAAAAACTGGCACCGAGTCGGTGCTTTTTTCTTCAAGTACGGAGCCACCTGGGAGACCCAGGGCACCGTTTGGAGACGACGG
65	ACCACGTCTCACACCGGGAGTCACATGGGAGTCACAGTTTTAGAGCTAGAAATAGCAAGTTAAAATAAGGCTAGTCCGTTATCAACTTGAAAAACTGGCACCGAGTCGGTGCTTTTTTCTTCACGGACGGAGGCAGATGGGACCCACATGGGCAGGTTTGGAGACGACGG
66	ACCACGTCTCACACCGGGAGTCACATGGGAGTCACAGTTTTAGAGCTAGAAATAGCAAGTTAAAATAAGGCTAGTCCGTTATCAACTTGAAAAACTGGCACCGAGTCGGTGCTTTTTTCTTCACTTACGGAGGCCCCTGGGAGTCACCTGGTGGGGTTTGGAGACGACGG
67	ACCACGTCTCACACCGGGAGTCACATGGGAGTCACAGTTTTAGAGCTAGAAATAGCAAGTTAAAATAAGGCTAGTCCGTTATCAACTTGAAAAACTGGCACCGAGTCGGTGCTTTTTTCTTCAGCCACGGAGTCACAGAGAAGGCACAGGGGCTCGTTTGGAGACGACGG
68	ACCACGTCTCACACCGGGAGTCACATGGGAGTCACAGTTTTAGAGCTAGAAATAGCAAGTTAAAATAAGGCTAGTCCGTTATCAACTTGAAAAACTGGCACCGAGTCGGTGCTTTTTTCTTCAGCTACGGAGTCACAGGGTAGGCACACGGTTTAGTTTGGAGACGACGG
69	ACCACGTCTCACACCGGGAGTCACATGGGAGTCACAGTTTTAGAGCTAGAAATAGCAAGTTAAAATAAGGCTAGTCCGTTATCAACTTGAAAAACTGGCACCGAGTCGGTGCTTTTTTCTTCAGGAACGGAGTCACATGGCCTTCACCAGGCTAGGTTTGGAGACGACGG
70	ACCACGTCTCACACCGGGAGTCACATGGGAGTCACAGTTTTAGAGCTAGAAATAGCAAGTTAAAATAAGGCTAGTCCGTTATCAACTTGAAAAACTGGCACCGAGTCGGTGCTTTTTTCTTCAGGTACGGAGTCACCCAGGAGGCACAGGGGCTGGTTTGGAGACGACGG
72	ACCACGTCTCACACCGGGAGTCACATGGGAGTCACAGTTTTAGAGCTAGAAATAGCAAGTTAAAATAAGGCTAGTCCGTTATCAACTTGAAAAACTGGCACCGAGTCGGTGCTTTTTTCTTCATAGACGGAGTCCCCTGGGAGTCCCCTGGTCATGTTTGGAGACGACGG
74	ACCACGTCTCACACCGGGAGTCACATGGGAGTCACAGTTTTAGAGCTAGAAATAGCAAGTTAAAATAAGGCTAGTCCGTTATCAACTTGAAAAACTGGCACCGAGTCGGTGCTTTTTTCTTCATTGACGGGGCCAAATGGGAGTCCCACGGGTTTGTTTGGAGACGACGG
75	ACCACGTCTCACACCGGGAGTCACATGGGAGTCACAGTTTTAGAGCTAGAAATAGCAAGTTAAAATAAGGCTAGTCCGTTATCAACTTGAAAAACTGGCACCGAGTCGGTGCTTTTTTCTTCCAACACGGGGTCAAATGGGAGTCCCTGGGTCATGTTTGGAGACGACGG
76	ACCACGTCTCACACCGGGAGTCACATGGGAGTCACAGTTTTAGAGCTAGAAATAGCAAGTTAAAATAAGGCTAGTCCGTTATCAACTTGAAAAACTGGCACCGAGTCGGTGCTTTTTTCTTCCAAGACGGGGTCACAAGGGGTTCACAGGGCCATGTTTGGAGACGACGG
77	ACCACGTCTCACACCGGGAGTCACATGGGAGTCACAGTTTTAGAGCTAGAAATAGCAAGTTAAAATAAGGCTAGTCCGTTATCAACTTGAAAAACTGGCACCGAGTCGGTGCTTTTTTCTTCCACGACGGTGTCACCTGGGAGACAGAGGGCTTCGTTTGGAGACGACGG
78	ACCACGTCTCACACCGGGAGTCACATGGGAGTCACAGTTTTAGAGCTAGAAATAGCAAGTTAAAATAAGGCTAGTCCGTTATCAACTTGAAAAACTGGCACCGAGTCGGTGCTTTTTTCTTCCAGCACGTGGTGACTTGGGAGTCACAAGGTTGAGTTTGGAGACGACGG
79	ACCACGTCTCACACCGGGAGTCACATGGGAGTCACAGTTTTAGAGCTAGAAATAGCAAGTTAAAATAAGGCTAGTCCGTTATCAACTTGAAAAACTGGCACCGAGTCGGTGCTTTTTTCTTCCAGGACTAAGTTACATGGGAGTCACCTGGAGGTGTTTGGAGACGACGG
81	ACCACGTCTCACACCGGGAGTCACATGGGAGTCACAGTTTTAGAGCTAGAAATAGCAAGTTAAAATAAGGCTAGTCCGTTATCAACTTGAAAAACTGGCACCGAGTCGGTGCTTTTTTCTTCCGAGACTTAGTCTCAAGGGAGTCACATGGGGAGGTTTGGAGACGACGG
82	ACCACGTCTCACACCGGTCTGGGACGCAAGGCGCCGGTTTTAGAGCTAGAAATAGCAAGTTAAAATAAGGCTAGTCCGTTATCAACTTGAAAAACTGGCACCGAGTCGGTGCTTTTTTCTTCCGCCACATCTGGGAGGCAAGGCCCGGTGGAAGTGTTTGGAGACGACGG
83	ACCACGTCTCACACCGGTCTGGGACGCAAGGCGCCGGTTTTAGAGCTAGAAATAGCAAGTTAAAATAAGGCTAGTCCGTTATCAACTTGAAAAACTGGCACCGAGTCGGTGCTTTTTTCTTCCTGTACGCCTTGGACCCAAGGCGCCCAGGGGGTGTTTGGAGACGACGG
85	ACCACGTCTCACACCGGTCTGGGACGCAAGGCGCCGGTTTTAGAGCTAGAAATAGCAAGTTAAAATAAGGCTAGTCCGTTATCAACTTGAAAAACTGGCACCGAGTCGGTGCTTTTTTCTTCGACTACGTCAGGGGCTCAGGGCGCCGGGGAAGCGTTTGGAGACGACGG
87	ACCACGTCTCACACCGGTCTGGGACGCAAGGCGCCGGTTTTAGAGCTAGAAATAGCAAGTTAAAATAAGGCTAGTCCGTTATCAACTTGAAAAACTGGCACCGAGTCGGTGCTTTTTTCTTCGGTCACGTCTGGGAGGGAAGGGCCCGAGGCCCAGTTTGGAGACGACGG
91	ACCACGTCTCACACCGGTCTGGGACGCAAGGCGCCGGTTTTAGAGCTAGAAATAGCAAGTTAAAATAAGGCTAGTCCGTTATCAACTTGAAAAACTGGCACCGAGTCGGTGCTTTTTTCTTCCGCGACCTCAGGGCCGCAAGGCGCAGGGGCAGTGTTTGGAGACGACGG
92	ACCACGTCTCACACCGGTCTGGGACGCAAGGCGCCGGTTTTAGAGCTAGAAATAGCAAGTTAAAATAAGGCTAGTCCGTTATCAACTTGAAAAACTGGCACCGAGTCGGTGCTTTTTTCTTCCGGAACCTCTGGGACGCCAGACGCAGTGGCTCAGTTTGGAGACGACGG
93	ACCACGTCTCACACCGGTCTGGGACGCAAGGCGCCGGTTTTAGAGCTAGAAATAGCAAGTTAAAATAAGGCTAGTCCGTTATCAACTTGAAAAACTGGCACCGAGTCGGTGCTTTTTTCTTCCGGTACCTCTGGGAGGCCAGGCGCAGTGGCTTAGTTTGGAGACGACGG
94	ACCACGTCTCACACCGGTCTGGGACGCAAGGCGCCGGTTTTAGAGCTAGAAATAGCAAGTTAAAATAAGGCTAGTCCGTTATCAACTTGAAAAACTGGCACCGAGTCGGTGCTTTTTTCTTCCGTGACGACTGGGAGGCCAGGCGCGGTGGCTCAGTTTGGAGACGACGG
95	ACCACGTCTCACACCGGTCTGGGACGCAAGGCGCCGGTTTTAGAGCTAGAAATAGCAAGTTAAAATAAGGCTAGTCCGTTATCAACTTGAAAAACTGGCACCGAGTCGGTGCTTTTTTCTTCCTACACGACTGGGGCGCAAGGCCCGGCGGCGGGGTTTGGAGACGACGG
96	ACCACGTCTCACACCGGTCTGGGACGCAAGGCGCCGGTTTTAGAGCTAGAAATAGCAAGTTAAAATAAGGCTAGTCCGTTATCAACTTGAAAAACTGGCACCGAGTCGGTGCTTTTTTCTTCCTATACGACTGGGGTGCAAGGCACCGGGGCCTGGTTTGGAGACGACGG
97	ACCACGTCTCACACCGGTCTGGGACGCAAGGCGCCGGTTTTAGAGCTAGAAATAGCAAGTTAAAATAAGGCTAGTCCGTTATCAACTTGAAAAACTGGCACCGAGTCGGTGCTTTTTTCTTCCTCAACGCCCGGGACTCACGGCGCCGCGGCGGTGTTTGGAGACGACGG
98	ACCACGTCTCACACCGGTCTGGGACGCAAGGCGCCGGTTTTAGAGCTAGAAATAGCAAGTTAAAATAAGGCTAGTCCGTTATCAACTTGAAAAACTGGCACCGAGTCGGTGCTTTTTTCTTCCTCCACGCCTGGGACGCACGCTGCCGCGGGGCCGTTTGGAGACGACGG
99	ACCACGTCTCACACCGGTCTGGGACGCAAGGCGCCGGTTTTAGAGCTAGAAATAGCAAGTTAAAATAAGGCTAGTCCGTTATCAACTTGAAAAACTGGCACCGAGTCGGTGCTTTTTTCTTCCTCGACGCCTGGGACGCGGGGAGCCGGGGGATCGTTTGGAGACGACGG
100	ACCACGTCTCACACCGGTCTGGGACGCAAGGCGCCGGTTTTAGAGCTAGAAATAGCAAGTTAAAATAAGGCTAGTCCGTTATCAACTTGAAAAACTGGCACCGAGTCGGTGCTTTTTTCTTCCTGAACGCCTGGGCCGCTAGGGGCCGCGGGCCTGTTTGGAGACGACGG
101	ACCACGTCTCACACCGGTCTGGGACGCAAGGCGCCGGTTTTAGAGCTAGAAATAGCAAGTTAAAATAAGGCTAGTCCGTTATCAACTTGAAAAACTGGCACCGAGTCGGTGCTTTTTTCTTCGAACACGGCTGGGAAGGAAGGAGCCGGGGAAGGGTTTGGAGACGACGG
102	ACCACGTCTCACACCGGTCTGGGACGCAAGGCGCCGGTTTTAGAGCTAGAAATAGCAAGTTAAAATAAGGCTAGTCCGTTATCAACTTGAAAAACTGGCACCGAGTCGGTGCTTTTTTCTTCGAATACGGCTGGGACGCCTGGGGCCGGGGCTGGGTTTGGAGACGACGG
103	ACCACGTCTCACACCGGTCTGGGACGCAAGGCGCCGGTTTTAGAGCTAGAAATAGCAAGTTAAAATAAGGCTAGTCCGTTATCAACTTGAAAAACTGGCACCGAGTCGGTGCTTTTTTCTTCGACCACGTATGGGAGGCAGGGCGCAGTGGCTCAGTTTGGAGACGACGG
104	ACCACGTCTCACACCGGTCTGGGACGCAAGGCGCCGGTTTTAGAGCTAGAAATAGCAAGTTAAAATAAGGCTAGTCCGTTATCAACTTGAAAAACTGGCACCGAGTCGGTGCTTTTTTCTTCGAGTACGTCCGGGGCGCACGGCACCGAGGAGAGGTTTGGAGACGACGG
105	ACCACGTCTCACACCGGTCTGGGACGCAAGGCGCCGGTTTTAGAGCTAGAAATAGCAAGTTAAAATAAGGCTAGTCCGTTATCAACTTGAAAAACTGGCACCGAGTCGGTGCTTTTTTCTTCGATCACGTCGGGCACGCAGGGCGCGGAGGCGCGGTTTGGAGACGACGG
106	ACCACGTCTCACACCGGTCTGGGACGCAAGGCGCCGGTTTTAGAGCTAGAAATAGCAAGTTAAAATAAGGCTAGTCCGTTATCAACTTGAAAAACTGGCACCGAGTCGGTGCTTTTTTCTTCGATGACGTCTAGGTCGCTAGGCGCTGCGGCCACGTTTGGAGACGACGG
107	ACCACGTCTCACACCGGTCTGGGACGCAAGGCGCCGGTTTTAGAGCTAGAAATAGCAAGTTAAAATAAGGCTAGTCCGTTATCAACTTGAAAAACTGGCACCGAGTCGGTGCTTTTTTCTTCGATTACGTCTGGACCGCAAGGGGGCGGGGTCTTGTTTGGAGACGACGG
108	ACCACGTCTCACACCGGTCTGGGACGCAAGGCGCCGGTTTTAGAGCTAGAAATAGCAAGTTAAAATAAGGCTAGTCCGTTATCAACTTGAAAAACTGGCACCGAGTCGGTGCTTTTTTCTTCGCATACGTCTGGCAGGCCAGGCGCGGTGGCTCAGTTTGGAGACGACGG
109	ACCACGTCTCACACCGGTCTGGGACGCAAGGCGCCGGTTTTAGAGCTAGAAATAGCAAGTTAAAATAAGGCTAGTCCGTTATCAACTTGAAAAACTGGCACCGAGTCGGTGCTTTTTTCTTCGCCAACGTCTGGGAAGCAAGTCGAAGTGGTTTGGTTTGGAGACGACGG
110	ACCACGTCTCACACCGGTCTGGGACGCAAGGCGCCGGTTTTAGAGCTAGAAATAGCAAGTTAAAATAAGGCTAGTCCGTTATCAACTTGAAAAACTGGCACCGAGTCGGTGCTTTTTTCTTCGCCGACGTCTGGGAAGCAGGGACCCGGGGGGCGGTTTGGAGACGACGG
111	ACCACGTCTCACACCGGTCTGGGACGCAAGGCGCCGGTTTTAGAGCTAGAAATAGCAAGTTAAAATAAGGCTAGTCCGTTATCAACTTGAAAAACTGGCACCGAGTCGGTGCTTTTTTCTTCGCGCACGTCTGGGACACAGGCTGCCGTGGCCCTGTTTGGAGACGACGG
112	ACCACGTCTCACACCGGTCTGGGACGCAAGGCGCCGGTTTTAGAGCTAGAAATAGCAAGTTAAAATAAGGCTAGTCCGTTATCAACTTGAAAAACTGGCACCGAGTCGGTGCTTTTTTCTTCGCGTACGTCTGGGACGCACAGCCCCTTGGGCTCGTTTGGAGACGACGG
113	ACCACGTCTCACACCGGTCTGGGACGCAAGGCGCCGGTTTTAGAGCTAGAAATAGCAAGTTAAAATAAGGCTAGTCCGTTATCAACTTGAAAAACTGGCACCGAGTCGGTGCTTTTTTCTTCGCTCACGTCTGGGACGGGAGGGGCCTTGGTTGGGTTTGGAGACGACGG
114	ACCACGTCTCACACCGGTCTGGGACGCAAGGCGCCGGTTTTAGAGCTAGAAATAGCAAGTTAAAATAAGGCTAGTCCGTTATCAACTTGAAAAACTGGCACCGAGTCGGTGCTTTTTTCTTCGCTTACGTCTGGGACTCATGGCCCCAGGGGGAAGTTTGGAGACGACGG
115	ACCACGTCTCACACCGGTCTGGGACGCAAGGCGCCGGTTTTAGAGCTAGAAATAGCAAGTTAAAATAAGGCTAGTCCGTTATCAACTTGAAAAACTGGCACCGAGTCGGTGCTTTTTTCTTCGGATACGTCTGGGAGGCCAGGCGTGGTGGCTCAGTTTGGAGACGACGG
116	ACCACGTCTCACACCGGTCTGGGACGCAAGGCGCCGGTTTTAGAGCTAGAAATAGCAAGTTAAAATAAGGCTAGTCCGTTATCAACTTGAAAAACTGGCACCGAGTCGGTGCTTTTTTCTTCGGTTACGTCTGGGGCCCAAGGCCCCCGGGTGGGGTTTGGAGACGACGG
117	ACCACGTCTCACACCGGTCTGGGACGCAAGGCGCCGGTTTTAGAGCTAGAAATAGCAAGTTAAAATAAGGCTAGTCCGTTATCAACTTGAAAAACTGGCACCGAGTCGGTGCTTTTTTCTTCGTATACGTCTGGGGCGCCGGGCCCCGCGGGTCCGTTTGGAGACGACGG
118	ACCACGTCTCACACCGGTCTGGGACGCAAGGCGCCGGTTTTAGAGCTAGAAATAGCAAGTTAAAATAAGGCTAGTCCGTTATCAACTTGAAAAACTGGCACCGAGTCGGTGCTTTTTTCTTCGTCCACGTCTGGTAAGCAAGGGGCAGGGGCTGTGTTTGGAGACGACGG
119	ACCACGTCTCACACCGGTCTGGGACGCAAGGCGCCGGTTTTAGAGCTAGAAATAGCAAGTTAAAATAAGGCTAGTCCGTTATCAACTTGAAAAACTGGCACCGAGTCGGTGCTTTTTTCTTCGTCGACGTCTGGTAGGCCAGGCGCAGTGGCTCAGTTTGGAGACGACGG
120	ACCACGTCTCACACCGGTCTGGGACGCAAGGCGCCGGTTTTAGAGCTAGAAATAGCAAGTTAAAATAAGGCTAGTCCGTTATCAACTTGAAAAACTGGCACCGAGTCGGTGCTTTTTTCTTCGTCTACGTCTTGGAGGCCAGGCACCGTGGCTCAGTTTGGAGACGACGG
121	ACCACGTCTCACACCGGTCTGGGACGCAAGGCGCCGGTTTTAGAGCTAGAAATAGCAAGTTAAAATAAGGCTAGTCCGTTATCAACTTGAAAAACTGGCACCGAGTCGGTGCTTTTTTCTTCGTGAACGTGGGGGGCGCAAGGCGGCGGGGGACTGTTTGGAGACGACGG
122	ACCACGTCTCACACCGGTCTGGGACGCAAGGCGCCGGTTTTAGAGCTAGAAATAGCAAGTTAAAATAAGGCTAGTCCGTTATCAACTTGAAAAACTGGCACCGAGTCGGTGCTTTTTTCTTCGTTAACGTTTGGGAGGCCAGGCGCAGTGGCTTAGTTTGGAGACGACGG
123	ACCACGTCTCACACCGGTCTGGGACGCAAGGCGCCGGTTTTAGAGCTAGAAATAGCAAGTTAAAATAAGGCTAGTCCGTTATCAACTTGAAAAACTGGCACCGAGTCGGTGCTTTTTTCTTCGTTGACTTATGGGAAGAAAGGCGCCGTGGCCATGTTTGGAGACGACGG
124	ACCACGTCTCACACCGGTCTGGGACGCAAGGCGCCGGTTTTAGAGCTAGAAATAGCAAGTTAAAATAAGGCTAGTCCGTTATCAACTTGAAAAACTGGCACCGAGTCGGTGCTTTTTTCTTCTAATACTTCTGGGACGCAAGGAGGCCTGGGGATGTTTGGAGACGACGG
125	ACCACGTCTCACACCGGTCTGGGACGCAAGGCGCCGGTTTTAGAGCTAGAAATAGCAAGTTAAAATAAGGCTAGTCCGTTATCAACTTGAAAAACTGGCACCGAGTCGGTGCTTTTTTCTTCTAGAACCTCTAGGACGCCAGGCGCAGTGGTTCAGTTTGGAGACGACGG
126	ACCACGTCTCACACCGGTCTGGGACGCAAGGCGCCGGTTTTAGAGCTAGAAATAGCAAGTTAAAATAAGGCTAGTCCGTTATCAACTTGAAAAACTGGCACCGAGTCGGTGCTTTTTTCTTCTAGCACCTCTCGGCCCCAAGGCGCCGGGGACGCGTTTGGAGACGACGG
127	ACCACGTCTCACACCGGTCTGGGACGCAAGGCGCCGGTTTTAGAGCTAGAAATAGCAAGTTAAAATAAGGCTAGTCCGTTATCAACTTGAAAAACTGGCACCGAGTCGGTGCTTTTTTCTTCTAGGACCTCTGGGATGCAAGGTTCCGAGGCTGAGTTTGGAGACGACGG
128	ACCACGTCTCACACCGGTCTGGGACGCAAGGCGCCGGTTTTAGAGCTAGAAATAGCAAGTTAAAATAAGGCTAGTCCGTTATCAACTTGAAAAACTGGCACCGAGTCGGTGCTTTTTTCTTCTATGACCTGCGGGACGGAAGGCGCCGGGGTGGGGTTTGGAGACGACGG
129	ACCACGTCTCACACCGGTCTGGGACGCAAGGCGCCGGTTTTAGAGCTAGAAATAGCAAGTTAAAATAAGGCTAGTCCGTTATCAACTTGAAAAACTGGCACCGAGTCGGTGCTTTTTTCTTCTATTACGACTGCGCCGCACGGCGCCGGGGCTCGGTTTGGAGACGACGG
130	ACCACGTCTCACACCGGTCTGGGACGCAAGGCGCCGGTTTTAGAGCTAGAAATAGCAAGTTAAAATAAGGCTAGTCCGTTATCAACTTGAAAAACTGGCACCGAGTCGGTGCTTTTTTCTTCTCGCACGCCTGGGACAAAAGGCACCGGGGAGGAGTTTGGAGACGACGG
131	ACCACGTCTCACACCGGTCTGGGACGCAAGGCGCCGGTTTTAGAGCTAGAAATAGCAAGTTAAAATAAGGCTAGTCCGTTATCAACTTGAAAAACTGGCACCGAGTCGGTGCTTTTTTCTTCTCGGACGCCTGGGTCCCCAGGCGCCGCGGACCCGTTTGGAGACGACGG
132	ACCACGTCTCACACCGGTCTGGGACGCAAGGCGCCGGTTTTAGAGCTAGAAATAGCAAGTTAAAATAAGGCTAGTCCGTTATCAACTTGAAAAACTGGCACCGAGTCGGTGCTTTTTTCTTCTCGTACGGCAGGGACCCAAGGCCCCGTGGCCCGGTTTGGAGACGACGG
134	ACCACGTCTCACACCGGTCTGGGACGCAAGGCGCCGGTTTTAGAGCTAGAAATAGCAAGTTAAAATAAGGCTAGTCCGTTATCAACTTGAAAAACTGGCACCGAGTCGGTGCTTTTTTCTTCTCTCACGGCAGGGCCCCAAGGCGCCGTGGAGGTGTTTGGAGACGACGG
135	ACCACGTCTCACACCGGTCTGGGACGCAAGGCGCCGGTTTTAGAGCTAGAAATAGCAAGTTAAAATAAGGCTAGTCCGTTATCAACTTGAAAAACTGGCACCGAGTCGGTGCTTTTTTCTTCTCTGACGGCGGGGCCGCTAGGCGCCGCGGGGGCGTTTGGAGACGACGG
136	ACCACGTCTCACACCGGTCTGGGACGCAAGGCGCCGGTTTTAGAGCTAGAAATAGCAAGTTAAAATAAGGCTAGTCCGTTATCAACTTGAAAAACTGGCACCGAGTCGGTGCTTTTTTCTTCTCTTACGGCTCGGACGCAGGACGCCGCGGGCCGGTTTGGAGACGACGG
137	ACCACGTCTCACACCGGTCTGGGACGCAAGGCGCCGGTTTTAGAGCTAGAAATAGCAAGTTAAAATAAGGCTAGTCCGTTATCAACTTGAAAAACTGGCACCGAGTCGGTGCTTTTTTCTTCTGACACGGCTGGGACGGAAGGCGGGGAGGTCGGGTTTGGAGACGACGG
138	ACCACGTCTCACACCGGTCTGGGACGCAAGGCGCCGGTTTTAGAGCTAGAAATAGCAAGTTAAAATAAGGCTAGTCCGTTATCAACTTGAAAAACTGGCACCGAGTCGGTGCTTTTTTCTTCTGATACGGCTGGGAGGCCAGGCGCGGTGGCTCAGTTTGGAGACGACGG
139	ACCACGTCTCACACCGGTCTGGGACGCAAGGCGCCGGTTTTAGAGCTAGAAATAGCAAGTTAAAATAAGGCTAGTCCGTTATCAACTTGAAAAACTGGCACCGAGTCGGTGCTTTTTTCTTCTGCGACGTCAGGGACCAAAGGAGCCGTGGGGAGGTTTGGAGACGACGG
140	ACCACGTCTCACACCGGTCTGGGACGCAAGGCGCCGGTTTTAGAGCTAGAAATAGCAAGTTAAAATAAGGCTAGTCCGTTATCAACTTGAAAAACTGGCACCGAGTCGGTGCTTTTTTCTTCTGGTACGTCCGGGGCGCAAGGCGGAGCGGGCTGGTTTGGAGACGACGG
141	ACCACGTCTCACACCGGTCTGGGACGCAAGGCGCCGGTTTTAGAGCTAGAAATAGCAAGTTAAAATAAGGCTAGTCCGTTATCAACTTGAAAAACTGGCACCGAGTCGGTGCTTTTTTCTTCTGTCACGTCTAGGAGGCCAGGCGCTGTGGCTCAGTTTGGAGACGACGG
142	ACCACGTCTCACACCGGTCTGGGACGCAAGGCGCCGGTTTTAGAGCTAGAAATAGCAAGTTAAAATAAGGCTAGTCCGTTATCAACTTGAAAAACTGGCACCGAGTCGGTGCTTTTTTCTTCTTAGACGTCTGGACCGCGAGGCTCCGCGGGTGGGTTTGGAGACGACGG
143	ACCACGTCTCACACCGGTCTGGGACGCAAGGCGCCGGTTTTAGAGCTAGAAATAGCAAGTTAAAATAAGGCTAGTCCGTTATCAACTTGAAAAACTGGCACCGAGTCGGTGCTTTTTTCTTCTTATACGTCTGGGAAGCCAGGCGCAGGGGTGCCGTTTGGAGACGACGG
144	ACCACGTCTCACACCGGTCTGGGACGCAAGGCGCCGGTTTTAGAGCTAGAAATAGCAAGTTAAAATAAGGCTAGTCCGTTATCAACTTGAAAAACTGGCACCGAGTCGGTGCTTTTTTCTTCTTGAACGTCTGGGACCCAGGGCACCTGGGCCCAGTTTGGAGACGACGG
145	ACCACGTCTCACACCGGTCTGGGACGCAAGGCGCCGGTTTTAGAGCTAGAAATAGCAAGTTAAAATAAGGCTAGTCCGTTATCAACTTGAAAAACTGGCACCGAGTCGGTGCTTTTTTCTTCTTGCACGTCTGGGACTCAGGGCGTCCAGGTGACGTTTGGAGACGACGG
146	ACCACGTCTCACACCGGTCTGGGACGCAAGGCGCCGGTTTTAGAGCTAGAAATAGCAAGTTAAAATAAGGCTAGTCCGTTATCAACTTGAAAAACTGGCACCGAGTCGGTGCTTTTTTCTTGAACCACGTCTGGGACTCGGGGCGCCTAGGCTGAGTTTGGAGACGACGG
147	ACCACGTCTCACACCGGTCTGGGACGCAAGGCGCCGGTTTTAGAGCTAGAAATAGCAAGTTAAAATAAGGCTAGTCCGTTATCAACTTGAAAAACTGGCACCGAGTCGGTGCTTTTTTCTTGAACTACGTCTGGGAGAGAAGGGGCCGTGGGTGGGTTTGGAGACGACGG
148	ACCACGTCTCACACCGGTCTGGGACGCAAGGCGCCGGTTTTAGAGCTAGAAATAGCAAGTTAAAATAAGGCTAGTCCGTTATCAACTTGAAAAACTGGCACCGAGTCGGTGCTTTTTTCTTGAAGAACGTCTGGGAGCCAAGGAGCCAGGGCCCCGTTTGGAGACGACGG
149	ACCACGTCTCACACCGGTCTGGGACGCAAGGCGCCGGTTTTAGAGCTAGAAATAGCAAGTTAAAATAAGGCTAGTCCGTTATCAACTTGAAAAACTGGCACCGAGTCGGTGCTTTTTTCTTGAAGGACGTCTGGGAGGCCAGGCACGGTGGCTCAGTTTGGAGACGACGG
150	ACCACGTCTCACACCGGTCTGGGACGCAAGGCGCCGGTTTTAGAGCTAGAAATAGCAAGTTAAAATAAGGCTAGTCCGTTATCAACTTGAAAAACTGGCACCGAGTCGGTGCTTTTTTCTTGAAGTACGTCTGGGAGGCCAGGCGCGGTGGCTCAGTTTGGAGACGACGG
151	ACCACGTCTCACACCGGTCTGGGACGCAAGGCGCCGGTTTTAGAGCTAGAAATAGCAAGTTAAAATAAGGCTAGTCCGTTATCAACTTGAAAAACTGGCACCGAGTCGGTGCTTTTTTCTTGAATGACGTCTGGGAGGGGAGGCGCCTTGGCCTGGTTTGGAGACGACGG
152	ACCACGTCTCACACCGGTCTGGGACGCAAGGCGCCGGTTTTAGAGCTAGAAATAGCAAGTTAAAATAAGGCTAGTCCGTTATCAACTTGAAAAACTGGCACCGAGTCGGTGCTTTTTTCTTGACGGACGTCTGGGCCTCAAGGGGCCCTGGGCTTGTTTGGAGACGACGG
153	ACCACGTCTCACACCGGTCTGGGACGCAAGGCGCCGGTTTTAGAGCTAGAAATAGCAAGTTAAAATAAGGCTAGTCCGTTATCAACTTGAAAAACTGGCACCGAGTCGGTGCTTTTTTCTTGACTCACGTCTGTGAGGCCAGGCGCGGTGGCTCAGTTTGGAGACGACGG
154	ACCACGTCTCACACCGGTCTGGGACGCAAGGCGCCGGTTTTAGAGCTAGAAATAGCAAGTTAAAATAAGGCTAGTCCGTTATCAACTTGAAAAACTGGCACCGAGTCGGTGCTTTTTTCTTGACTTACGTGTGGGCCACAAGGCGGCGCGGGCTGGTTTGGAGACGACGG
155	ACCACGTCTCACACCGGTCTGGGACGCAAGGCGCCGGTTTTAGAGCTAGAAATAGCAAGTTAAAATAAGGCTAGTCCGTTATCAACTTGAAAAACTGGCACCGAGTCGGTGCTTTTTTCTTGAGCGACTTCTTGGAGGCCAGGCGCCGTGGCCCAGTTTGGAGACGACGG
156	ACCACGTCTCACACCGGGCCTTCATCAGCTTTTCCAGTTTTAGAGCTAGAAATAGCAAGTTAAAATAAGGCTAGTCCGTTATCAACTTGAAAAACTGGCACCGAGTCGGTGCTTTTTTAACCAAGAACAGCTTTCATCAGATTCTCCAAGGGGTCGTTTGGAGACGACGG
157	ACCACGTCTCACACCGGGCCTTCATCAGCTTTTCCAGTTTTAGAGCTAGAAATAGCAAGTTAAAATAAGGCTAGTCCGTTATCAACTTGAAAAACTGGCACCGAGTCGGTGCTTTTTTAACCGTCTACGGCCTTCATCAGCTTAACAATGGGTCTGTTTGGAGACGACGG
159	ACCACGTCTCACACCGGGCCTTCATCAGCTTTTCCAGTTTTAGAGCTAGAAATAGCAAGTTAAAATAAGGCTAGTCCGTTATCAACTTGAAAAACTGGCACCGAGTCGGTGCTTTTTTAACGAGACACTGCCTTAATCTGCCTTTCCAGGGAAAGGTTTGGAGACGACGG
164	ACCACGTCTCACACCGGGCCTTCATCAGCTTTTCCAGTTTTAGAGCTAGAAATAGCAAGTTAAAATAAGGCTAGTCCGTTATCAACTTGAAAAACTGGCACCGAGTCGGTGCTTTTTTAACGTGGAACGGCTTTCATCAGATTCTCAAAGGGTTTGTTTGGAGACGACGG
167	ACCACGTCTCACACCGGGCCTTCATCAGCTTTTCCAGTTTTAGAGCTAGAAATAGCAAGTTAAAATAAGGCTAGTCCGTTATCAACTTGAAAAACTGGCACCGAGTCGGTGCTTTTTTAACATTGCACAGCCTGCATCATCTTGTCCATGGAACTGTTTGGAGACGACGG
168	ACCACGTCTCACACCGGGCCTTCATCAGCTTTTCCAGTTTTAGAGCTAGAAATAGCAAGTTAAAATAAGGCTAGTCCGTTATCAACTTGAAAAACTGGCACCGAGTCGGTGCTTTTTTAACCAAGTACAGGCTTCCTCAGCTTTGCCAAGGGAGAGTTTGGAGACGACGG
169	ACCACGTCTCACACCGGGCCTTCATCAGCTTTTCCAGTTTTAGAGCTAGAAATAGCAAGTTAAAATAAGGCTAGTCCGTTATCAACTTGAAAAACTGGCACCGAGTCGGTGCTTTTTTAACCACCAACATCCTTCATCAGCTTCTCAAGGGGTTTGTTTGGAGACGACGG
170	ACCACGTCTCACACCGGGCCTTCATCAGCTTTTCCAGTTTTAGAGCTAGAAATAGCAAGTTAAAATAAGGCTAGTCCGTTATCAACTTGAAAAACTGGCACCGAGTCGGTGCTTTTTTAACCACGGACGACCTTCATCATCAGTTCCAAGGGCCTGTTTGGAGACGACGG
171	ACCACGTCTCACACCGGGCCTTCATCAGCTTTTCCAGTTTTAGAGCTAGAAATAGCAAGTTAAAATAAGGCTAGTCCGTTATCAACTTGAAAAACTGGCACCGAGTCGGTGCTTTTTTAACCAGATACGACTTTCATCAGCTTCTCCCTGGGCTCGTTTGGAGACGACGG
172	ACCACGTCTCACACCGGGCCTTCATCAGCTTTTCCAGTTTTAGAGCTAGAAATAGCAAGTTAAAATAAGGCTAGTCCGTTATCAACTTGAAAAACTGGCACCGAGTCGGTGCTTTTTTAACCAGCAACGCACATCATCAGCTCTTCCAGGGTAGGGTTTGGAGACGACGG
173	ACCACGTCTCACACCGGGCCTTCATCAGCTTTTCCAGTTTTAGAGCTAGAAATAGCAAGTTAAAATAAGGCTAGTCCGTTATCAACTTGAAAAACTGGCACCGAGTCGGTGCTTTTTTAACCATGGACGGCATTCATCTGCTTCCCCATGGGGGCGTTTGGAGACGACGG
174	ACCACGTCTCACACCGGGCCTTCATCAGCTTTTCCAGTTTTAGAGCTAGAAATAGCAAGTTAAAATAAGGCTAGTCCGTTATCAACTTGAAAAACTGGCACCGAGTCGGTGCTTTTTTAACCATTCACGGCCATCATCACCTTTCACATGGGTTAGTTTGGAGACGACGG
175	ACCACGTCTCACACCGGGCCTTCATCAGCTTTTCCAGTTTTAGAGCTAGAAATAGCAAGTTAAAATAAGGCTAGTCCGTTATCAACTTGAAAAACTGGCACCGAGTCGGTGCTTTTTTAACCGAGCACGGCCCTCATCAGTTTGTCTAGGGAAATGTTTGGAGACGACGG
176	ACCACGTCTCACACCGGGCCTTCATCAGCTTTTCCAGTTTTAGAGCTAGAAATAGCAAGTTAAAATAAGGCTAGTCCGTTATCAACTTGAAAAACTGGCACCGAGTCGGTGCTTTTTTAACCGAGTACGGCCCTCTTCTGCATTTCCATGGAACTGTTTGGAGACGACGG
177	ACCACGTCTCACACCGGGCCTTCATCAGCTTTTCCAGTTTTAGAGCTAGAAATAGCAAGTTAAAATAAGGCTAGTCCGTTATCAACTTGAAAAACTGGCACCGAGTCGGTGCTTTTTTAACCGATCACGGCCGTCATCAGATTCTCAAAGGGGCCGTTTGGAGACGACGG
178	ACCACGTCTCACACCGGGCCTTCATCAGCTTTTCCAGTTTTAGAGCTAGAAATAGCAAGTTAAAATAAGGCTAGTCCGTTATCAACTTGAAAAACTGGCACCGAGTCGGTGCTTTTTTAACCGCATACGGCCTCCATCACCTTCTGCAGGGCGGCGTTTGGAGACGACGG
179	ACCACGTCTCACACCGGGCCTTCATCAGCTTTTCCAGTTTTAGAGCTAGAAATAGCAAGTTAAAATAAGGCTAGTCCGTTATCAACTTGAAAAACTGGCACCGAGTCGGTGCTTTTTTAACCGCCTACGGCCTCCATCATCTGTGCCATGGAGATGTTTGGAGACGACGG
180	ACCACGTCTCACACCGGGCCTTCATCAGCTTTTCCAGTTTTAGAGCTAGAAATAGCAAGTTAAAATAAGGCTAGTCCGTTATCAACTTGAAAAACTGGCACCGAGTCGGTGCTTTTTTAACCGCGCACGGCCTCCATGAGCTTCTCTATGGAGCTGTTTGGAGACGACGG
181	ACCACGTCTCACACCGGGCCTTCATCAGCTTTTCCAGTTTTAGAGCTAGAAATAGCAAGTTAAAATAAGGCTAGTCCGTTATCAACTTGAAAAACTGGCACCGAGTCGGTGCTTTTTTAACCGCGTACGGCCTGCAGCAGCTGCTCCAGGGCAGTGTTTGGAGACGACGG
182	ACCACGTCTCACACCGGGCCTTCATCAGCTTTTCCAGTTTTAGAGCTAGAAATAGCAAGTTAAAATAAGGCTAGTCCGTTATCAACTTGAAAAACTGGCACCGAGTCGGTGCTTTTTTAACCGCTTACGGCCTGCATCAGATTCACCAGGGAGGGGTTTGGAGACGACGG
183	ACCACGTCTCACACCGGGCCTTCATCAGCTTTTCCAGTTTTAGAGCTAGAAATAGCAAGTTAAAATAAGGCTAGTCCGTTATCAACTTGAAAAACTGGCACCGAGTCGGTGCTTTTTTAACCGGTGACGGCCTTCAGGAACTCTTCCATGGGTATGTTTGGAGACGACGG
184	ACCACGTCTCACACCGGGCCTTCATCAGCTTTTCCAGTTTTAGAGCTAGAAATAGCAAGTTAAAATAAGGCTAGTCCGTTATCAACTTGAAAAACTGGCACCGAGTCGGTGCTTTTTTAACCGTACACGGCCTTCATAATCATCTCCATGGAGGAGTTTGGAGACGACGG
185	ACCACGTCTCACACCGGGCCTTCATCAGCTTTTCCAGTTTTAGAGCTAGAAATAGCAAGTTAAAATAAGGCTAGTCCGTTATCAACTTGAAAAACTGGCACCGAGTCGGTGCTTTTTTAACCGTGTACGGCCTTCATCATCTCTTGCCAGGACAAGTTTGGAGACGACGG
186	ACCACGTCTCACACCGGGCCTTCATCAGCTTTTCCAGTTTTAGAGCTAGAAATAGCAAGTTAAAATAAGGCTAGTCCGTTATCAACTTGAAAAACTGGCACCGAGTCGGTGCTTTTTTAACCTAAGACGGCCTTCATCTGCTTCACCCTGGCCTTGTTTGGAGACGACGG
187	ACCACGTCTCACACCGGGCCTTCATCAGCTTTTCCAGTTTTAGAGCTAGAAATAGCAAGTTAAAATAAGGCTAGTCCGTTATCAACTTGAAAAACTGGCACCGAGTCGGTGCTTTTTTAACCTACAACGGCCTTCATCTTCTTTAGCAAGGCCCTGTTTGGAGACGACGG
188	ACCACGTCTCACACCGGGCCTTCATCAGCTTTTCCAGTTTTAGAGCTAGAAATAGCAAGTTAAAATAAGGCTAGTCCGTTATCAACTTGAAAAACTGGCACCGAGTCGGTGCTTTTTTAACCTACGACGGCCTTCCACAGCCTTTCCAAGGACACGTTTGGAGACGACGG
189	ACCACGTCTCACACCGGGCCTTCATCAGCTTTTCCAGTTTTAGAGCTAGAAATAGCAAGTTAAAATAAGGCTAGTCCGTTATCAACTTGAAAAACTGGCACCGAGTCGGTGCTTTTTTAACCTATAACGGCCTTCTTCAGCATCACCAGGGCAGCGTTTGGAGACGACGG
190	ACCACGTCTCACACCGGGCCTTCATCAGCTTTTCCAGTTTTAGAGCTAGAAATAGCAAGTTAAAATAAGGCTAGTCCGTTATCAACTTGAAAAACTGGCACCGAGTCGGTGCTTTTTTAACCTCCAACGGCCTTGAGCAACTTGTCCAAGGTCACGTTTGGAGACGACGG
191	ACCACGTCTCACACCGGGCCTTCATCAGCTTTTCCAGTTTTAGAGCTAGAAATAGCAAGTTAAAATAAGGCTAGTCCGTTATCAACTTGAAAAACTGGCACCGAGTCGGTGCTTTTTTAACCTCCGACGGCCTTGATGAGCATTTCCAGGGTCAGGTTTGGAGACGACGG
192	ACCACGTCTCACACCGGGCCTTCATCAGCTTTTCCAGTTTTAGAGCTAGAAATAGCAAGTTAAAATAAGGCTAGTCCGTTATCAACTTGAAAAACTGGCACCGAGTCGGTGCTTTTTTAACCTCTCACGGCCTTTGTCAGCATTTCCTCGGTCCCGTTTGGAGACGACGG
193	ACCACGTCTCACACCGGGCCTTCATCAGCTTTTCCAGTTTTAGAGCTAGAAATAGCAAGTTAAAATAAGGCTAGTCCGTTATCAACTTGAAAAACTGGCACCGAGTCGGTGCTTTTTTAACCTCTTACGGCGTTCAGCAGCCTTCCCAGGGTGGGGTTTGGAGACGACGG
194	ACCACGTCTCACACCGGGCCTTCATCAGCTTTTCCAGTTTTAGAGCTAGAAATAGCAAGTTAAAATAAGGCTAGTCCGTTATCAACTTGAAAAACTGGCACCGAGTCGGTGCTTTTTTAACCTGCCACGGCTTTCAGCACCTTCTCCATGGTGGCGTTTGGAGACGACGG
195	ACCACGTCTCACACCGGGCCTTCATCAGCTTTTCCAGTTTTAGAGCTAGAAATAGCAAGTTAAAATAAGGCTAGTCCGTTATCAACTTGAAAAACTGGCACCGAGTCGGTGCTTTTTTAACCTTACACGGCTTTGATCAGCTTGTCCAAGGTTAAGTTTGGAGACGACGG
196	ACCACGTCTCACACCGGGCCTTCATCAGCTTTTCCAGTTTTAGAGCTAGAAATAGCAAGTTAAAATAAGGCTAGTCCGTTATCAACTTGAAAAACTGGCACCGAGTCGGTGCTTTTTTAACGAACGACGGTCATCATCAGCCTCTCCAAGGAAGAGTTTGGAGACGACGG
197	ACCACGTCTCACACCGGGCCTTCATCAGCTTTTCCAGTTTTAGAGCTAGAAATAGCAAGTTAAAATAAGGCTAGTCCGTTATCAACTTGAAAAACTGGCACCGAGTCGGTGCTTTTTTAACGAAGAACGGTCTCCATCAGCTTATACAGGGCAAAGTTTGGAGACGACGG
198	ACCACGTCTCACACCGGGCCTTCATCAGCTTTTCCAGTTTTAGAGCTAGAAATAGCAAGTTAAAATAAGGCTAGTCCGTTATCAACTTGAAAAACTGGCACCGAGTCGGTGCTTTTTTAACGACTCACTGCCTCCAACAGCTATTCCACGGTCTAGTTTGGAGACGACGG
199	ACCACGTCTCACACCGGGCCTTCATCAGCTTTTCCAGTTTTAGAGCTAGAAATAGCAAGTTAAAATAAGGCTAGTCCGTTATCAACTTGAAAAACTGGCACCGAGTCGGTGCTTTTTTAACGAGATACTGCCTTCATCAGCCTGGCCACGGCTGTGTTTGGAGACGACGG
200	ACCACGTCTCACACCGGGCCTTCATCAGCTTTTCCAGTTTTAGAGCTAGAAATAGCAAGTTAAAATAAGGCTAGTCCGTTATCAACTTGAAAAACTGGCACCGAGTCGGTGCTTTTTTAACGAGGTACTGCTTTCATCAGCTCATCCACGGCCTCGTTTGGAGACGACGG
201	ACCACGTCTCACACCGGGCCTTCATCAGCTTTTCCAGTTTTAGAGCTAGAAATAGCAAGTTAAAATAAGGCTAGTCCGTTATCAACTTGAAAAACTGGCACCGAGTCGGTGCTTTTTTAACGAGTTACTGTCTTCATCAGCATCTCCAGGGTGGTGTTTGGAGACGACGG
202	ACCACGTCTCACACCGGGCCTTCATCAGCTTTTCCAGTTTTAGAGCTAGAAATAGCAAGTTAAAATAAGGCTAGTCCGTTATCAACTTGAAAAACTGGCACCGAGTCGGTGCTTTTTTAACGATTCACAGACTTCATCAGATTCTCCAGGGAATCGTTTGGAGACGACGG
203	ACCACGTCTCACACCGGGCCTTCATCAGCTTTTCCAGTTTTAGAGCTAGAAATAGCAAGTTAAAATAAGGCTAGTCCGTTATCAACTTGAAAAACTGGCACCGAGTCGGTGCTTTTTTAACGCACAACAGCCGTCATCTGCTTTGCCAGGGTAAAGTTTGGAGACGACGG
204	ACCACGTCTCACACCGGGCCTTCATCAGCTTTTCCAGTTTTAGAGCTAGAAATAGCAAGTTAAAATAAGGCTAGTCCGTTATCAACTTGAAAAACTGGCACCGAGTCGGTGCTTTTTTAACGCACCACAGCCTTCAGCAGCATTTCCCTGGACCCGTTTGGAGACGACGG
205	ACCACGTCTCACACCGGGCCTTCATCAGCTTTTCCAGTTTTAGAGCTAGAAATAGCAAGTTAAAATAAGGCTAGTCCGTTATCAACTTGAAAAACTGGCACCGAGTCGGTGCTTTTTTAACGCAGCACAGCCTTCATCAATTCTTCCAGGGTATCGTTTGGAGACGACGG
206	ACCACGTCTCACACCGGGCCTTCATCAGCTTTTCCAGTTTTAGAGCTAGAAATAGCAAGTTAAAATAAGGCTAGTCCGTTATCAACTTGAAAAACTGGCACCGAGTCGGTGCTTTTTTAACGCATCACAGCCTTCCTCTGCTTTGCCAAGGCTGAGTTTGGAGACGACGG
207	ACCACGTCTCACACCGGGCCTTCATCAGCTTTTCCAGTTTTAGAGCTAGAAATAGCAAGTTAAAATAAGGCTAGTCCGTTATCAACTTGAAAAACTGGCACCGAGTCGGTGCTTTTTTAACGCCTAACAGCTTTCATCAGCTCTTCAAAGGCATGGTTTGGAGACGACGG
208	ACCACGTCTCACACCGGGCCTTCATCAGCTTTTCCAGTTTTAGAGCTAGAAATAGCAAGTTAAAATAAGGCTAGTCCGTTATCAACTTGAAAAACTGGCACCGAGTCGGTGCTTTTTTAACGCGCCACCGCCTTAGTCAGCTTTGCCAGGGGCGCGTTTGGAGACGACGG
209	ACCACGTCTCACACCGGGCCTTCATCAGCTTTTCCAGTTTTAGAGCTAGAAATAGCAAGTTAAAATAAGGCTAGTCCGTTATCAACTTGAAAAACTGGCACCGAGTCGGTGCTTTTTTAACGCTCCACGCCCTTCATCCGCTTTCCCGCGGCCCCGTTTGGAGACGACGG
210	ACCACGTCTCACACCGGGCCTTCATCAGCTTTTCCAGTTTTAGAGCTAGAAATAGCAAGTTAAAATAAGGCTAGTCCGTTATCAACTTGAAAAACTGGCACCGAGTCGGTGCTTTTTTAACGCTCGACGCCCTTCATTAGCTTTACCAAGGTGATGTTTGGAGACGACGG
211	ACCACGTCTCACACCGGGCCTTCATCAGCTTTTCCAGTTTTAGAGCTAGAAATAGCAAGTTAAAATAAGGCTAGTCCGTTATCAACTTGAAAAACTGGCACCGAGTCGGTGCTTTTTTAACGCTCTACGCCCTTCCCCAGCTTTCCCAGGGGCCGGTTTGGAGACGACGG
212	ACCACGTCTCACACCGGGCCTTCATCAGCTTTTCCAGTTTTAGAGCTAGAAATAGCAAGTTAAAATAAGGCTAGTCCGTTATCAACTTGAAAAACTGGCACCGAGTCGGTGCTTTTTTAACGCTGCACGCCTTTCATAAGCTTTACCAAGGTGGTGTTTGGAGACGACGG
213	ACCACGTCTCACACCGGGCCTTCATCAGCTTTTCCAGTTTTAGAGCTAGAAATAGCAAGTTAAAATAAGGCTAGTCCGTTATCAACTTGAAAAACTGGCACCGAGTCGGTGCTTTTTTAACGCTTAACGGACTTCAACAGCCTGTCCAAGGACACGTTTGGAGACGACGG
214	ACCACGTCTCACACCGGGCCTTCATCAGCTTTTCCAGTTTTAGAGCTAGAAATAGCAAGTTAAAATAAGGCTAGTCCGTTATCAACTTGAAAAACTGGCACCGAGTCGGTGCTTTTTTAACGGACCACGGCAATCATCAGCTTCTCCAAGGTCCTGTTTGGAGACGACGG
215	ACCACGTCTCACACCGGGCCTTCATCAGCTTTTCCAGTTTTAGAGCTAGAAATAGCAAGTTAAAATAAGGCTAGTCCGTTATCAACTTGAAAAACTGGCACCGAGTCGGTGCTTTTTTAACGGATCACGGCATTCCTCAGGGTTTCCAGGGTCTCGTTTGGAGACGACGG
216	ACCACGTCTCACACCGGGCCTTCATCAGCTTTTCCAGTTTTAGAGCTAGAAATAGCAAGTTAAAATAAGGCTAGTCCGTTATCAACTTGAAAAACTGGCACCGAGTCGGTGCTTTTTTAACGGCATACGGCCAGCATGAGCTTCTCCATGGCAGCGTTTGGAGACGACGG
217	ACCACGTCTCACACCGGGCCTTCATCAGCTTTTCCAGTTTTAGAGCTAGAAATAGCAAGTTAAAATAAGGCTAGTCCGTTATCAACTTGAAAAACTGGCACCGAGTCGGTGCTTTTTTAACGGCCTACGGCCATCATCAGCAGTTCCGTGGATTGGTTTGGAGACGACGG
218	ACCACGTCTCACACCGGGCCTTCATCAGCTTTTCCAGTTTTAGAGCTAGAAATAGCAAGTTAAAATAAGGCTAGTCCGTTATCAACTTGAAAAACTGGCACCGAGTCGGTGCTTTTTTAACGGCGTACGGCCCTCATCAGCTCTTACTTGGACTTGTTTGGAGACGACGG
219	ACCACGTCTCACACCGGGCCTTCATCAGCTTTTCCAGTTTTAGAGCTAGAAATAGCAAGTTAAAATAAGGCTAGTCCGTTATCAACTTGAAAAACTGGCACCGAGTCGGTGCTTTTTTAACGGCTCACGGCCCTCCTCAGCTCCTCCAGGGCCTCGTTTGGAGACGACGG
220	ACCACGTCTCACACCGGGCCTTCATCAGCTTTTCCAGTTTTAGAGCTAGAAATAGCAAGTTAAAATAAGGCTAGTCCGTTATCAACTTGAAAAACTGGCACCGAGTCGGTGCTTTTTTAACGGTCCACGGCCTCCAGCAGTTTATCCAGGGTCACGTTTGGAGACGACGG
221	ACCACGTCTCACACCGGGCCTTCATCAGCTTTTCCAGTTTTAGAGCTAGAAATAGCAAGTTAAAATAAGGCTAGTCCGTTATCAACTTGAAAAACTGGCACCGAGTCGGTGCTTTTTTAACGGTGTACGGCCTCCATCCCCTTTGCCAGGGAGGAGTTTGGAGACGACGG
222	ACCACGTCTCACACCGGGCCTTCATCAGCTTTTCCAGTTTTAGAGCTAGAAATAGCAAGTTAAAATAAGGCTAGTCCGTTATCAACTTGAAAAACTGGCACCGAGTCGGTGCTTTTTTAACGGTTCACGGCCTCCCTTAGCTCTTCCATGGACATGTTTGGAGACGACGG
223	ACCACGTCTCACACCGGGCCTTCATCAGCTTTTCCAGTTTTAGAGCTAGAAATAGCAAGTTAAAATAAGGCTAGTCCGTTATCAACTTGAAAAACTGGCACCGAGTCGGTGCTTTTTTAACGGTTGACGGCCTTAATGAGCTTTACAACGGGCAAGTTTGGAGACGACGG
224	ACCACGTCTCACACCGGGCCTTCATCAGCTTTTCCAGTTTTAGAGCTAGAAATAGCAAGTTAAAATAAGGCTAGTCCGTTATCAACTTGAAAAACTGGCACCGAGTCGGTGCTTTTTTAACGTACTACGGCCTTCAGCACCTCCTCCAGGGACAGGTTTGGAGACGACGG
225	ACCACGTCTCACACCGGGCCTTCATCAGCTTTTCCAGTTTTAGAGCTAGAAATAGCAAGTTAAAATAAGGCTAGTCCGTTATCAACTTGAAAAACTGGCACCGAGTCGGTGCTTTTTTAACGTATTACGGCCTTCATCATCTTCAACATGGACTAGTTTGGAGACGACGG
226	ACCACGTCTCACACCGGGCCTTCATCAGCTTTTCCAGTTTTAGAGCTAGAAATAGCAAGTTAAAATAAGGCTAGTCCGTTATCAACTTGAAAAACTGGCACCGAGTCGGTGCTTTTTTAACGTCACACGGCCTTCATCATCTTTCTCCCGGATCCGTTTGGAGACGACGG
227	ACCACGTCTCACACCGGGCCTTCATCAGCTTTTCCAGTTTTAGAGCTAGAAATAGCAAGTTAAAATAAGGCTAGTCCGTTATCAACTTGAAAAACTGGCACCGAGTCGGTGCTTTTTTAACGTCAGACGGCCTTCATCGCCTTCCCCAAGGCTGTGTTTGGAGACGACGG
228	ACCACGTCTCACACCGGGCCTTCATCAGCTTTTCCAGTTTTAGAGCTAGAAATAGCAAGTTAAAATAAGGCTAGTCCGTTATCAACTTGAAAAACTGGCACCGAGTCGGTGCTTTTTTAACGTCCAACGGCCTTCATTAGTTCTTACAGGGGGTCGTTTGGAGACGACGG
229	ACCACGTCTCACACCGGGCCTTCATCAGCTTTTCCAGTTTTAGAGCTAGAAATAGCAAGTTAAAATAAGGCTAGTCCGTTATCAACTTGAAAAACTGGCACCGAGTCGGTGCTTTTTTAACGTCCGACGGCCTTCATTTGCATTTCTATGGACAAGTTTGGAGACGACGG
230	ACCACGTCTCACACCGGGCCTTCATCAGCTTTTCCAGTTTTAGAGCTAGAAATAGCAAGTTAAAATAAGGCTAGTCCGTTATCAACTTGAAAAACTGGCACCGAGTCGGTGCTTTTTTAACGTCGAACGGCCTTCATTTGCTTATCAAAGGTTGCGTTTGGAGACGACGG
231	ACCACGTCTCACACCGGGCCTTCATCAGCTTTTCCAGTTTTAGAGCTAGAAATAGCAAGTTAAAATAAGGCTAGTCCGTTATCAACTTGAAAAACTGGCACCGAGTCGGTGCTTTTTTAACGTCGCACGGCCTTCCTCACCTTGTCCAGGGGGCCGTTTGGAGACGACGG
232	ACCACGTCTCACACCGGGCCTTCATCAGCTTTTCCAGTTTTAGAGCTAGAAATAGCAAGTTAAAATAAGGCTAGTCCGTTATCAACTTGAAAAACTGGCACCGAGTCGGTGCTTTTTTAACGTCTAACGGCCTTCCTCAGCTTTACCTTGGCCAAGTTTGGAGACGACGG
233	ACCACGTCTCACACCGGGCCTTCATCAGCTTTTCCAGTTTTAGAGCTAGAAATAGCAAGTTAAAATAAGGCTAGTCCGTTATCAACTTGAAAAACTGGCACCGAGTCGGTGCTTTTTTAACGTGACACGGCCTTTATCAGCCATTCCTGGGGGCGGTTTGGAGACGACGG
234	ACCACGTCTCACACCGGGCCTTCATCAGCTTTTCCAGTTTTAGAGCTAGAAATAGCAAGTTAAAATAAGGCTAGTCCGTTATCAACTTGAAAAACTGGCACCGAGTCGGTGCTTTTTTAACGTGCCACGGCTTTCATCACCTTGTCAAAGGGATTGTTTGGAGACGACGG
235	ACCACGTCTCACACCGGGCCTTCATCAGCTTTTCCAGTTTTAGAGCTAGAAATAGCAAGTTAAAATAAGGCTAGTCCGTTATCAACTTGAAAAACTGGCACCGAGTCGGTGCTTTTTTAACGTTAGACGGCTTTCATCTGAATTTCCAGGGCTTGGTTTGGAGACGACGG
236	ACCACGTCTCACACCGGGCCTTCATCAGCTTTTCCAGTTTTAGAGCTAGAAATAGCAAGTTAAAATAAGGCTAGTCCGTTATCAACTTGAAAAACTGGCACCGAGTCGGTGCTTTTTTAACGTTCCACGGCTTTGATCAGCTTTCCAATGGAGGTGTTTGGAGACGACGG
237	ACCACGTCTCACACCGGGCCTTCATCAGCTTTTCCAGTTTTAGAGCTAGAAATAGCAAGTTAAAATAAGGCTAGTCCGTTATCAACTTGAAAAACTGGCACCGAGTCGGTGCTTTTTTAACGTTGAACGGGCTCTATCAGCTTTGCCAGGGAGTAGTTTGGAGACGACGG
238	ACCACGTCTCACACCGGGCCTTCATCAGCTTTTCCAGTTTTAGAGCTAGAAATAGCAAGTTAAAATAAGGCTAGTCCGTTATCAACTTGAAAAACTGGCACCGAGTCGGTGCTTTTTTAACTAACTACGGGCTTCATCAGCTTCTCAGCGGGCACGTTTGGAGACGACGG
239	ACCACGTCTCACACCGGGCCTTCATCAGCTTTTCCAGTTTTAGAGCTAGAAATAGCAAGTTAAAATAAGGCTAGTCCGTTATCAACTTGAAAAACTGGCACCGAGTCGGTGCTTTTTTAACTAAGCACGGTCTACATCAGATATTCCAGGGGCTGGTTTGGAGACGACGG
240	ACCACGTCTCACACCGGGCCTTCATCAGCTTTTCCAGTTTTAGAGCTAGAAATAGCAAGTTAAAATAAGGCTAGTCCGTTATCAACTTGAAAAACTGGCACCGAGTCGGTGCTTTTTTAACTAATAACGGTCTTCATCATCTTTCCTAGGGACTCGTTTGGAGACGACGG
241	ACCACGTCTCACACCGGGCCTTCATCAGCTTTTCCAGTTTTAGAGCTAGAAATAGCAAGTTAAAATAAGGCTAGTCCGTTATCAACTTGAAAAACTGGCACCGAGTCGGTGCTTTTTTAACTAGACACTGCCTGCCTCAGCCTTTCCAAGGCCTTGTTTGGAGACGACGG
242	ACCACGTCTCACACCGGGCCTTCATCAGCTTTTCCAGTTTTAGAGCTAGAAATAGCAAGTTAAAATAAGGCTAGTCCGTTATCAACTTGAAAAACTGGCACCGAGTCGGTGCTTTTTTAACTAGAGACTGCCTTAATCAGCTCTTCCATGGCTGTGTTTGGAGACGACGG
243	ACCACGTCTCACACCGGGCCTTCATCAGCTTTTCCAGTTTTAGAGCTAGAAATAGCAAGTTAAAATAAGGCTAGTCCGTTATCAACTTGAAAAACTGGCACCGAGTCGGTGCTTTTTTAACTAGCTACTGCCTTCATCAGTTTGTCCTGGGCCTCGTTTGGAGACGACGG
244	ACCACGTCTCACACCGGGCTGAGGAAGCTGAGGAGGGTTTTAGAGCTAGAAATAGCAAGTTAAAATAAGGCTAGTCCGTTATCAACTTGAAAAACTGGCACCGAGTCGGTGCTTTTTTAACTATGGACAACTCAGGAAGCTGAGGTGGGGGGATCGTTTGGAGACGACGG
245	ACCACGTCTCACACCGGGCTGAGGAAGCTGAGGAGGGTTTTAGAGCTAGAAATAGCAAGTTAAAATAAGGCTAGTCCGTTATCAACTTGAAAAACTGGCACCGAGTCGGTGCTTTTTTAACTCAGAACAGAAGAGGAAGATGAGGAGGAGGAAGAGTTTGGAGACGACGG
246	ACCACGTCTCACACCGGGCTGAGGAAGCTGAGGAGGGTTTTAGAGCTAGAAATAGCAAGTTAAAATAAGGCTAGTCCGTTATCAACTTGAAAAACTGGCACCGAGTCGGTGCTTTTTTAACTCATTACAGATGAGGAAACTGAGGAGAAGGAATGGTTTGGAGACGACGG
248	ACCACGTCTCACACCGGGCTGAGGAAGCTGAGGAGGGTTTTAGAGCTAGAAATAGCAAGTTAAAATAAGGCTAGTCCGTTATCAACTTGAAAAACTGGCACCGAGTCGGTGCTTTTTTAACTCCGCACAGATGAGGAAACTGAGGCGGGGGAAATGTTTGGAGACGACGG
249	ACCACGTCTCACACCGGGCTGAGGAAGCTGAGGAGGGTTTTAGAGCTAGAAATAGCAAGTTAAAATAAGGCTAGTCCGTTATCAACTTGAAAAACTGGCACCGAGTCGGTGCTTTTTTAACTCCTCACAGATGAGGAAGAGGAGGAGGAGGGGGAGTTTGGAGACGACGG
250	ACCACGTCTCACACCGGGCTGAGGAAGCTGAGGAGGGTTTTAGAGCTAGAAATAGCAAGTTAAAATAAGGCTAGTCCGTTATCAACTTGAAAAACTGGCACCGAGTCGGTGCTTTTTTAACTGAACACAGCTGAGGAAGAGGAGGAAGAGGGTCAGTTTGGAGACGACGG
251	ACCACGTCTCACACCGGGCTGAGGAAGCTGAGGAGGGTTTTAGAGCTAGAAATAGCAAGTTAAAATAAGGCTAGTCCGTTATCAACTTGAAAAACTGGCACCGAGTCGGTGCTTTTTTAACTGACCACAGCTGAGGAAGATGAGGGAGAGGTCGCGTTTGGAGACGACGG
253	ACCACGTCTCACACCGGGCTGAGGAAGCTGAGGAGGGTTTTAGAGCTAGAAATAGCAAGTTAAAATAAGGCTAGTCCGTTATCAACTTGAAAAACTGGCACCGAGTCGGTGCTTTTTTAACTGGTGACAGCTTAGGGGGCTGAGGAGGGGGGCAGGTTTGGAGACGACGG
254	ACCACGTCTCACACCGGGCTGAGGAAGCTGAGGAGGGTTTTAGAGCTAGAAATAGCAAGTTAAAATAAGGCTAGTCCGTTATCAACTTGAAAAACTGGCACCGAGTCGGTGCTTTTTTAACTTAAGACAGTTGAGTAGGCTGAGGAGGAGGAGGAGTTTGGAGACGACGG
255	ACCACGTCTCACACCGGGCTGAGGAAGCTGAGGAGGGTTTTAGAGCTAGAAATAGCAAGTTAAAATAAGGCTAGTCCGTTATCAACTTGAAAAACTGGCACCGAGTCGGTGCTTTTTTAACTTCACACCACTGAGCAGGCTGAGGAGGAGGAGGAGTTTGGAGACGACGG
259	ACCACGTCTCACACCGGGCTGAGGAAGCTGAGGAGGGTTTTAGAGCTAGAAATAGCAAGTTAAAATAAGGCTAGTCCGTTATCAACTTGAAAAACTGGCACCGAGTCGGTGCTTTTTTAACTTCGTACCACTGAGTAGGCTGAGGAGGAGGAGGAGTTTGGAGACGACGG
268	ACCACGTCTCACACCGGGCTGAGGAAGCTGAGGAGGGTTTTAGAGCTAGAAATAGCAAGTTAAAATAAGGCTAGTCCGTTATCAACTTGAAAAACTGGCACCGAGTCGGTGCTTTTTTAACTTGGAACCATTGAGGAGGCTGAGGAGGAGGAAGAGTTTGGAGACGACGG
269	ACCACGTCTCACACCGGGCTGAGGAAGCTGAGGAGGGTTTTAGAGCTAGAAATAGCAAGTTAAAATAAGGCTAGTCCGTTATCAACTTGAAAAACTGGCACCGAGTCGGTGCTTTTTTAACTTGGCACCATTGAGTAAGCTGAGGAGGAGGAAAAGTTTGGAGACGACGG
272	ACCACGTCTCACACCGGGCTGAGGAAGCTGAGGAGGGTTTTAGAGCTAGAAATAGCAAGTTAAAATAAGGCTAGTCCGTTATCAACTTGAAAAACTGGCACCGAGTCGGTGCTTTTTTAAGAACGGACCGCTGAGGAAGGAGAGGAGTGGGACATGTTTGGAGACGACGG
274	ACCACGTCTCACACCGGGCTGAGGAAGCTGAGGAGGGTTTTAGAGCTAGAAATAGCAAGTTAAAATAAGGCTAGTCCGTTATCAACTTGAAAAACTGGCACCGAGTCGGTGCTTTTTTAAGAAGGAACCGCTGAGTAGGCTGAGGAGGAGGAGGAGTTTGGAGACGACGG
275	ACCACGTCTCACACCGGGCTGAGGAAGCTGAGGAGGGTTTTAGAGCTAGAAATAGCAAGTTAAAATAAGGCTAGTCCGTTATCAACTTGAAAAACTGGCACCGAGTCGGTGCTTTTTTAAGAATCGACCGTTGAGTAGGCTGAGGAGGAGGAAGAGTTTGGAGACGACGG
289	ACCACGTCTCACACCGGGCTGAGGAAGCTGAGGAGGGTTTTAGAGCTAGAAATAGCAAGTTAAAATAAGGCTAGTCCGTTATCAACTTGAAAAACTGGCACCGAGTCGGTGCTTTTTTAAGACATCACCGTTGAGTAGGCTGAGGAGGGGGAGGAGTTTGGAGACGACGG
290	ACCACGTCTCACACCGGGCTGAGGAAGCTGAGGAGGGTTTTAGAGCTAGAAATAGCAAGTTAAAATAAGGCTAGTCCGTTATCAACTTGAAAAACTGGCACCGAGTCGGTGCTTTTTTAAGACCGAACGAATGAGGAAGAGGAGGAGGAGGAAGAGTTTGGAGACGACGG
292	ACCACGTCTCACACCGGGCTGAGGAAGCTGAGGAGGGTTTTAGAGCTAGAAATAGCAAGTTAAAATAAGGCTAGTCCGTTATCAACTTGAAAAACTGGCACCGAGTCGGTGCTTTTTTAAGACGTGACGACTGAGGAAGAAGAGGAAGAGGAGGGGTTTGGAGACGACGG
293	ACCACGTCTCACACCGGGCTGAGGAAGCTGAGGAGGGTTTTAGAGCTAGAAATAGCAAGTTAAAATAAGGCTAGTCCGTTATCAACTTGAAAAACTGGCACCGAGTCGGTGCTTTTTTAAGACTATACGACTGAGGAAGAGGAGGAAGAGGAGGGGTTTGGAGACGACGG
297	ACCACGTCTCACACCGGGCTGAGGAAGCTGAGGAGGGTTTTAGAGCTAGAAATAGCAAGTTAAAATAAGGCTAGTCCGTTATCAACTTGAAAAACTGGCACCGAGTCGGTGCTTTTTTAAGACTTCACGACTGAGGAATCTGAGGAGGGGGGGAAGTTTGGAGACGACGG
299	ACCACGTCTCACACCGGGCTGAGGAAGCTGAGGAGGGTTTTAGAGCTAGAAATAGCAAGTTAAAATAAGGCTAGTCCGTTATCAACTTGAAAAACTGGCACCGAGTCGGTGCTTTTTTAAGAGAACACGACTGAGGAGGAAGAGGAGGAGGAGGAGTTTGGAGACGACGG
303	ACCACGTCTCACACCGGGCTGAGGAAGCTGAGGAGGGTTTTAGAGCTAGAAATAGCAAGTTAAAATAAGGCTAGTCCGTTATCAACTTGAAAAACTGGCACCGAGTCGGTGCTTTTTTAAGATCCAACGGAAGAGGAAGAAGAGGAGGAGGAAGAGTTTGGAGACGACGG
318	ACCACGTCTCACACCGGGCTGAGGAAGCTGAGGAGGGTTTTAGAGCTAGAAATAGCAAGTTAAAATAAGGCTAGTCCGTTATCAACTTGAAAAACTGGCACCGAGTCGGTGCTTTTTTAAGATGTCACGGAAGAGGAAGACGAGGAGGAGGAGGAGTTTGGAGACGACGG
320	ACCACGTCTCACACCGGGCTGAGGAAGCTGAGGAGGGTTTTAGAGCTAGAAATAGCAAGTTAAAATAAGGCTAGTCCGTTATCAACTTGAAAAACTGGCACCGAGTCGGTGCTTTTTTAAGATTACACGGAAGAGGAAGAGGAGGAGGAGGAGGAGTTTGGAGACGACGG
348	ACCACGTCTCACACCGGGCTGAGGAAGCTGAGGAGGGTTTTAGAGCTAGAAATAGCAAGTTAAAATAAGGCTAGTCCGTTATCAACTTGAAAAACTGGCACCGAGTCGGTGCTTTTTTAAGCAGGCACGGAAGAGGAAGATGAAGAGGAGGAAGGGTTTGGAGACGACGG
351	ACCACGTCTCACACCGGGCTGAGGAAGCTGAGGAGGGTTTTAGAGCTAGAAATAGCAAGTTAAAATAAGGCTAGTCCGTTATCAACTTGAAAAACTGGCACCGAGTCGGTGCTTTTTTAAGCATCTACGGAAGAGGAGGATGAGGAGGAGGAAGAGTTTGGAGACGACGG
355	ACCACGTCTCACACCGGGCTGAGGAAGCTGAGGAGGGTTTTAGAGCTAGAAATAGCAAGTTAAAATAAGGCTAGTCCGTTATCAACTTGAAAAACTGGCACCGAGTCGGTGCTTTTTTAAGCCAGCACGGACGAGGAAGAGGAGGAGGAGGCCGAGTTTGGAGACGACGG
360	ACCACGTCTCACACCGGGCTGAGGAAGCTGAGGAGGGTTTTAGAGCTAGAAATAGCAAGTTAAAATAAGGCTAGTCCGTTATCAACTTGAAAAACTGGCACCGAGTCGGTGCTTTTTTAAGCCGGCACGGAGAAGGAAGATGAGGAGGAGGAGGAGTTTGGAGACGACGG
368	ACCACGTCTCACACCGGGCTGAGGAAGCTGAGGAGGGTTTTAGAGCTAGAAATAGCAAGTTAAAATAAGGCTAGTCCGTTATCAACTTGAAAAACTGGCACCGAGTCGGTGCTTTTTTAAGCGAACACGGAGGAGGAAGAAGAGGAGGAGGGGAAGTTTGGAGACGACGG
390	ACCACGTCTCACACCGGGCTGAGGAAGCTGAGGAGGGTTTTAGAGCTAGAAATAGCAAGTTAAAATAAGGCTAGTCCGTTATCAACTTGAAAAACTGGCACCGAGTCGGTGCTTTTTTAAGCGGTAACGGAGGAGGAAGACGAGGAGGAGGGGGAGTTTGGAGACGACGG
393	ACCACGTCTCACACCGGGCTGAGGAAGCTGAGGAGGGTTTTAGAGCTAGAAATAGCAAGTTAAAATAAGGCTAGTCCGTTATCAACTTGAAAAACTGGCACCGAGTCGGTGCTTTTTTAAGCGTAGACGGAGGAGGAAGAGGAGGAGGAGGAGGAGTTTGGAGACGACGG
512	ACCACGTCTCACACCGGGCTGAGGAAGCTGAGGAGGGTTTTAGAGCTAGAAATAGCAAGTTAAAATAAGGCTAGTCCGTTATCAACTTGAAAAACTGGCACCGAGTCGGTGCTTTTTTAAGGTCTCACAGATGAGGAAGAAGAGGAGGAGGAGAAGTTTGGAGACGACGG
516	ACCACGTCTCACACCGGGCTGAGGAAGCTGAGGAGGGTTTTAGAGCTAGAAATAGCAAGTTAAAATAAGGCTAGTCCGTTATCAACTTGAAAAACTGGCACCGAGTCGGTGCTTTTTTAAGGTTACACAGCAGAGGAAGAAGAGGAGGAGGACAAGTTTGGAGACGACGG
518	ACCACGTCTCACACCGGGCTGAGGAAGCTGAGGAGGGTTTTAGAGCTAGAAATAGCAAGTTAAAATAAGGCTAGTCCGTTATCAACTTGAAAAACTGGCACCGAGTCGGTGCTTTTTTAAGTAGTAACAGCTGAGGAGGAGGAGGAGGAGGAGGAGTTTGGAGACGACGG
530	ACCACGTCTCACACCGGGCTGAGGAAGCTGAGGAGGGTTTTAGAGCTAGAAATAGCAAGTTAAAATAAGGCTAGTCCGTTATCAACTTGAAAAACTGGCACCGAGTCGGTGCTTTTTTAAGTCTGTACCACTGAGTAGGCTGAGGAGGGGGAGGCGTTTGGAGACGACGG
540	ACCACGTCTCACACCGGGCTGAGGAAGCTGAGGAGGGTTTTAGAGCTAGAAATAGCAAGTTAAAATAAGGCTAGTCCGTTATCAACTTGAAAAACTGGCACCGAGTCGGTGCTTTTTTAAGTGGTCACCGTTGAGAAGGCTGAGGAGGAGGCAGGGTTTGGAGACGACGG
557	ACCACGTCTCACACCGGGCTGAGGAAGCTGAGGAGGGTTTTAGAGCTAGAAATAGCAAGTTAAAATAAGGCTAGTCCGTTATCAACTTGAAAAACTGGCACCGAGTCGGTGCTTTTTTAATAACGGACGACTCAGGAGGATGAGGAGGTGGCACTGTTTGGAGACGACGG
563	ACCACGTCTCACACCGGGCTGAGGAAGCTGAGGAGGGTTTTAGAGCTAGAAATAGCAAGTTAAAATAAGGCTAGTCCGTTATCAACTTGAAAAACTGGCACCGAGTCGGTGCTTTTTTAATAATCGACGACTCAGGAGGCTGAGGTGGGGGGATTGTTTGGAGACGACGG
566	ACCACGTCTCACACCGGGCTGAGGAAGCTGAGGAGGGTTTTAGAGCTAGAAATAGCAAGTTAAAATAAGGCTAGTCCGTTATCAACTTGAAAAACTGGCACCGAGTCGGTGCTTTTTTAATAATTCACGACTGAGAGAGCTGAGGATGAGGAAGAGTTTGGAGACGACGG
574	ACCACGTCTCACACCGGGCTGAGGAAGCTGAGGAGGGTTTTAGAGCTAGAAATAGCAAGTTAAAATAAGGCTAGTCCGTTATCAACTTGAAAAACTGGCACCGAGTCGGTGCTTTTTTAATACCTTACGACTGAGGAGGAGGAGGAGGAGGAGGAGTTTGGAGACGACGG
575	ACCACGTCTCACACCGGGCTGAGGAAGCTGAGGAGGGTTTTAGAGCTAGAAATAGCAAGTTAAAATAAGGCTAGTCCGTTATCAACTTGAAAAACTGGCACCGAGTCGGTGCTTTTTTAATACTAGACGATTGAGTAGGCTGAGGAGGAGGATGAGTTTGGAGACGACGG
578	ACCACGTCTCACACCGGGCTGAGGAAGCTGAGGAGGGTTTTAGAGCTAGAAATAGCAAGTTAAAATAAGGCTAGTCCGTTATCAACTTGAAAAACTGGCACCGAGTCGGTGCTTTTTTAATAGCGGACGCCTGAGGAGGAGGAGGAGGAGGGGGAGTTTGGAGACGACGG
580	ACCACGTCTCACACCGGGCTGAGGAAGCTGAGGAGGGTTTTAGAGCTAGAAATAGCAAGTTAAAATAAGGCTAGTCCGTTATCAACTTGAAAAACTGGCACCGAGTCGGTGCTTTTTTAATATACCACGGAAGAAGAAGATGAGGAGGAGGGGTAGTTTGGAGACGACGG
592	ACCACGTCTCACACCGGGCTGAGGAAGCTGAGGAGGGTTTTAGAGCTAGAAATAGCAAGTTAAAATAAGGCTAGTCCGTTATCAACTTGAAAAACTGGCACCGAGTCGGTGCTTTTTTAATATCGGACGGAAGAGGAAGAAGAGGAGGGGGGGGGGTTTGGAGACGACGG
624	ACCACGTCTCACACCGGGCTGAGGAAGCTGAGGAGGGTTTTAGAGCTAGAAATAGCAAGTTAAAATAAGGCTAGTCCGTTATCAACTTGAAAAACTGGCACCGAGTCGGTGCTTTTTTAATCACTGACGGAAGAGGAAGATGGGGAGGAGGGGGTGTTTGGAGACGACGG
626	ACCACGTCTCACACCGGGCTGAGGAAGCTGAGGAGGGTTTTAGAGCTAGAAATAGCAAGTTAAAATAAGGCTAGTCCGTTATCAACTTGAAAAACTGGCACCGAGTCGGTGCTTTTTTAATCATACACGGACGAGGAGGATGAGGAGGAGGAGGAGTTTGGAGACGACGG
630	ACCACGTCTCACACCGGGCTGAGGAAGCTGAGGAGGGTTTTAGAGCTAGAAATAGCAAGTTAAAATAAGGCTAGTCCGTTATCAACTTGAAAAACTGGCACCGAGTCGGTGCTTTTTTAATCATTCACGGAGGAGAAAGCGGAGGAGGAGGAGGGGTTTGGAGACGACGG
801	ACCACGTCTCACACCGGGCTGAGGAAGCTGAGGAGGGTTTTAGAGCTAGAAATAGCAAGTTAAAATAAGGCTAGTCCGTTATCAACTTGAAAAACTGGCACCGAGTCGGTGCTTTTTTAACTATCCACAACAGAGGAAGCTGAGAAGGTGGAAGTGTTTGGAGACGACGG
802	ACCACGTCTCACACCGGGCTGAGGAAGCTGAGGAGGGTTTTAGAGCTAGAAATAGCAAGTTAAAATAAGGCTAGTCCGTTATCAACTTGAAAAACTGGCACCGAGTCGGTGCTTTTTTAACTATGAACAACTCAGGAAGCTGAGGTGGAGGGTGGGTTTGGAGACGACGG
803	ACCACGTCTCACACCGGGCTGAGGAAGCTGAGGAGGGTTTTAGAGCTAGAAATAGCAAGTTAAAATAAGGCTAGTCCGTTATCAACTTGAAAAACTGGCACCGAGTCGGTGCTTTTTTAACTATGTACAACTGAGGATGCTGAGGAAGGGGGCCTGTTTGGAGACGACGG
804	ACCACGTCTCACACCGGGCTGAGGAAGCTGAGGAGGGTTTTAGAGCTAGAAATAGCAAGTTAAAATAAGGCTAGTCCGTTATCAACTTGAAAAACTGGCACCGAGTCGGTGCTTTTTTAACTCACAACAACTTAGGGAGCTGAGGAGGCGGGGCTGTTTGGAGACGACGG
806	ACCACGTCTCACACCGGGCTGAGGAAGCTGAGGAGGGTTTTAGAGCTAGAAATAGCAAGTTAAAATAAGGCTAGTCCGTTATCAACTTGAAAAACTGGCACCGAGTCGGTGCTTTTTTAACTCAGCACAGAAGAGGAAGGTGAGGAGGAGGAAATGTTTGGAGACGACGG
808	ACCACGTCTCACACCGGGCTGAGGAAGCTGAGGAGGGTTTTAGAGCTAGAAATAGCAAGTTAAAATAAGGCTAGTCCGTTATCAACTTGAAAAACTGGCACCGAGTCGGTGCTTTTTTAACTCCGTACAGATGAGGAAACTGAGGTGGGGGATGTGTTTGGAGACGACGG
809	ACCACGTCTCACACCGGGCTGAGGAAGCTGAGGAGGGTTTTAGAGCTAGAAATAGCAAGTTAAAATAAGGCTAGTCCGTTATCAACTTGAAAAACTGGCACCGAGTCGGTGCTTTTTTAACTCCTTACAGATGAGGAAGCAGAGGAAGGGGAAGAGTTTGGAGACGACGG
810	ACCACGTCTCACACCGGGCTGAGGAAGCTGAGGAGGGTTTTAGAGCTAGAAATAGCAAGTTAAAATAAGGCTAGTCCGTTATCAACTTGAAAAACTGGCACCGAGTCGGTGCTTTTTTAACTCGACACAGATGAGGAAGCTGAGAATGAGGTAAAGTTTGGAGACGACGG
811	ACCACGTCTCACACCGGGCTGAGGAAGCTGAGGAGGGTTTTAGAGCTAGAAATAGCAAGTTAAAATAAGGCTAGTCCGTTATCAACTTGAAAAACTGGCACCGAGTCGGTGCTTTTTTAACTCGATACAGATGAGGAAGCTGAGGAGCGGGAGACGTTTGGAGACGACGG
812	ACCACGTCTCACACCGGGCTGAGGAAGCTGAGGAGGGTTTTAGAGCTAGAAATAGCAAGTTAAAATAAGGCTAGTCCGTTATCAACTTGAAAAACTGGCACCGAGTCGGTGCTTTTTTAACTCGCCACAGATGAGGAAGCTGAGGCAGGGGCTGGGTTTGGAGACGACGG
813	ACCACGTCTCACACCGGGCTGAGGAAGCTGAGGAGGGTTTTAGAGCTAGAAATAGCAAGTTAAAATAAGGCTAGTCCGTTATCAACTTGAAAAACTGGCACCGAGTCGGTGCTTTTTTAACTCGCTACAGATGAGGAGGCTGAAGAGGAGGAGTTGTTTGGAGACGACGG
815	ACCACGTCTCACACCGGGCTGAGGAAGCTGAGGAGGGTTTTAGAGCTAGAAATAGCAAGTTAAAATAAGGCTAGTCCGTTATCAACTTGAAAAACTGGCACCGAGTCGGTGCTTTTTTAACTCGGCACAGCAGAGGAAGAGGAGGAGGAGGAAGAGTTTGGAGACGACGG
816	ACCACGTCTCACACCGGGCTGAGGAAGCTGAGGAGGGTTTTAGAGCTAGAAATAGCAAGTTAAAATAAGGCTAGTCCGTTATCAACTTGAAAAACTGGCACCGAGTCGGTGCTTTTTTAACTCGTAACAGCCCAGGAAGCTGAGGACGCGGTGAGGTTTGGAGACGACGG
818	ACCACGTCTCACACCGGGCTGAGGAAGCTGAGGAGGGTTTTAGAGCTAGAAATAGCAAGTTAAAATAAGGCTAGTCCGTTATCAACTTGAAAAACTGGCACCGAGTCGGTGCTTTTTTAACTCGTTACAGCTCAGCAAGCTGAGGCGGGGGAGGCGTTTGGAGACGACGG
819	ACCACGTCTCACACCGGGCTGAGGAAGCTGAGGAGGGTTTTAGAGCTAGAAATAGCAAGTTAAAATAAGGCTAGTCCGTTATCAACTTGAAAAACTGGCACCGAGTCGGTGCTTTTTTAACTCTACACAGCTCAGGAAGGTGAGGAGCTGGTAAGGTTTGGAGACGACGG
820	ACCACGTCTCACACCGGGCTGAGGAAGCTGAGGAGGGTTTTAGAGCTAGAAATAGCAAGTTAAAATAAGGCTAGTCCGTTATCAACTTGAAAAACTGGCACCGAGTCGGTGCTTTTTTAACTCTATACAGCTCAGGAGGCTGAGGTGGAGGATTGGTTTGGAGACGACGG
821	ACCACGTCTCACACCGGGCTGAGGAAGCTGAGGAGGGTTTTAGAGCTAGAAATAGCAAGTTAAAATAAGGCTAGTCCGTTATCAACTTGAAAAACTGGCACCGAGTCGGTGCTTTTTTAACTCTCAACAGCTCTGGACGCTGAGGAGGTGGGGAAGTTTGGAGACGACGG
822	ACCACGTCTCACACCGGGCTGAGGAAGCTGAGGAGGGTTTTAGAGCTAGAAATAGCAAGTTAAAATAAGGCTAGTCCGTTATCAACTTGAAAAACTGGCACCGAGTCGGTGCTTTTTTAACTCTCCACAGCTGAGAAAGCTGAGGATCTGGACATGTTTGGAGACGACGG
823	ACCACGTCTCACACCGGGCTGAGGAAGCTGAGGAGGGTTTTAGAGCTAGAAATAGCAAGTTAAAATAAGGCTAGTCCGTTATCAACTTGAAAAACTGGCACCGAGTCGGTGCTTTTTTAACTCTGCACAGCTGAGCGAGCTGAGGATGCGGAGCCGTTTGGAGACGACGG
824	ACCACGTCTCACACCGGGCTGAGGAAGCTGAGGAGGGTTTTAGAGCTAGAAATAGCAAGTTAAAATAAGGCTAGTCCGTTATCAACTTGAAAAACTGGCACCGAGTCGGTGCTTTTTTAACTGAAGACAGCTGAGGAAGAGGAGGAGGAGGAGGAGTTTGGAGACGACGG
825	ACCACGTCTCACACCGGGCTGAGGAAGCTGAGGAGGGTTTTAGAGCTAGAAATAGCAAGTTAAAATAAGGCTAGTCCGTTATCAACTTGAAAAACTGGCACCGAGTCGGTGCTTTTTTAACTGAGCACAGCTGAGGAAGCAGGGCAGGCGGCCTCGTTTGGAGACGACGG
826	ACCACGTCTCACACCGGGCTGAGGAAGCTGAGGAGGGTTTTAGAGCTAGAAATAGCAAGTTAAAATAAGGCTAGTCCGTTATCAACTTGAAAAACTGGCACCGAGTCGGTGCTTTTTTAACTGAGTACAGCTGAGGAAGCAGGGGCGGGGGGAGGGTTTGGAGACGACGG
827	ACCACGTCTCACACCGGGCTGAGGAAGCTGAGGAGGGTTTTAGAGCTAGAAATAGCAAGTTAAAATAAGGCTAGTCCGTTATCAACTTGAAAAACTGGCACCGAGTCGGTGCTTTTTTAACTGATGACAGCTGAGGAAGCTGAGGCTCAGGAAGCGTTTGGAGACGACGG
828	ACCACGTCTCACACCGGGCTGAGGAAGCTGAGGAGGGTTTTAGAGCTAGAAATAGCAAGTTAAAATAAGGCTAGTCCGTTATCAACTTGAAAAACTGGCACCGAGTCGGTGCTTTTTTAACTGATTACAGCTGAGGAAGCTGAGGCTTAGGTTAAGTTTGGAGACGACGG
829	ACCACGTCTCACACCGGGCTGAGGAAGCTGAGGAGGGTTTTAGAGCTAGAAATAGCAAGTTAAAATAAGGCTAGTCCGTTATCAACTTGAAAAACTGGCACCGAGTCGGTGCTTTTTTAACTGCAGACAGCTGAGGAAGCTGCAGAGTGGGAGGTGTTTGGAGACGACGG
830	ACCACGTCTCACACCGGGCTGAGGAAGCTGAGGAGGGTTTTAGAGCTAGAAATAGCAAGTTAAAATAAGGCTAGTCCGTTATCAACTTGAAAAACTGGCACCGAGTCGGTGCTTTTTTAACTGCCAACAGCTGAGGAATCTGACAAGGTGGCTAAGTTTGGAGACGACGG
832	ACCACGTCTCACACCGGGCTGAGGAAGCTGAGGAGGGTTTTAGAGCTAGAAATAGCAAGTTAAAATAAGGCTAGTCCGTTATCAACTTGAAAAACTGGCACCGAGTCGGTGCTTTTTTAACTGCGAACAGCTGAGGAGGCGGCGGAGGGGGCGGGGTTTGGAGACGACGG
833	ACCACGTCTCACACCGGGCTGAGGAAGCTGAGGAGGGTTTTAGAGCTAGAAATAGCAAGTTAAAATAAGGCTAGTCCGTTATCAACTTGAAAAACTGGCACCGAGTCGGTGCTTTTTTAACTGCGCACAGCTGAGGAGTCTGAGGAGGTGGCCAGGTTTGGAGACGACGG
834	ACCACGTCTCACACCGGGCTGAGGAAGCTGAGGAGGGTTTTAGAGCTAGAAATAGCAAGTTAAAATAAGGCTAGTCCGTTATCAACTTGAAAAACTGGCACCGAGTCGGTGCTTTTTTAACTGCGGACAGCTGAGGGAGATGAGGAGGAGGAAGAGTTTGGAGACGACGG
836	ACCACGTCTCACACCGGGCTGAGGAAGCTGAGGAGGGTTTTAGAGCTAGAAATAGCAAGTTAAAATAAGGCTAGTCCGTTATCAACTTGAAAAACTGGCACCGAGTCGGTGCTTTTTTAACTGGCCACAGCTGGGGAGGCAGAGGAGGCGGCGTGGTTTGGAGACGACGG
837	ACCACGTCTCACACCGGGCTGAGGAAGCTGAGGAGGGTTTTAGAGCTAGAAATAGCAAGTTAAAATAAGGCTAGTCCGTTATCAACTTGAAAAACTGGCACCGAGTCGGTGCTTTTTTAACTGGTTACAGGAGAGGAAGATGAGGAGGAGGAGGAGTTTGGAGACGACGG
839	ACCACGTCTCACACCGGGCTGAGGAAGCTGAGGAGGGTTTTAGAGCTAGAAATAGCAAGTTAAAATAAGGCTAGTCCGTTATCAACTTGAAAAACTGGCACCGAGTCGGTGCTTTTTTAACTGTCCACAGTGGAGGGAGCTGAGGAGGTGGTGTGGTTTGGAGACGACGG
840	ACCACGTCTCACACCGGGCTGAGGAAGCTGAGGAGGGTTTTAGAGCTAGAAATAGCAAGTTAAAATAAGGCTAGTCCGTTATCAACTTGAAAAACTGGCACCGAGTCGGTGCTTTTTTAACTGTCTACAGTTGAGAAAGCTGTGGAGGAGGAGCAGTTTGGAGACGACGG
841	ACCACGTCTCACACCGGGCTGAGGAAGCTGAGGAGGGTTTTAGAGCTAGAAATAGCAAGTTAAAATAAGGCTAGTCCGTTATCAACTTGAAAAACTGGCACCGAGTCGGTGCTTTTTTAACTGTGCACAGTTGAGGAAGCTCAGGATGAGGGTGTGTTTGGAGACGACGG
842	ACCACGTCTCACACCGGGCTGAGGAAGCTGAGGAGGGTTTTAGAGCTAGAAATAGCAAGTTAAAATAAGGCTAGTCCGTTATCAACTTGAAAAACTGGCACCGAGTCGGTGCTTTTTTAACTGTGGACAGTTGAGTAAGCCGAGGAGGAGGAGGAGTTTGGAGACGACGG
843	ACCACGTCTCACACCGGGCTGAGGAAGCTGAGGAGGGTTTTAGAGCTAGAAATAGCAAGTTAAAATAAGGCTAGTCCGTTATCAACTTGAAAAACTGGCACCGAGTCGGTGCTTTTTTAACTGTTGACAGTTGAGTAAGCTGAGGAGGAGGGAAGGTTTGGAGACGACGG
844	ACCACGTCTCACACCGGGCTGAGGAAGCTGAGGAGGGTTTTAGAGCTAGAAATAGCAAGTTAAAATAAGGCTAGTCCGTTATCAACTTGAAAAACTGGCACCGAGTCGGTGCTTTTTTAACTTACGACAGTTGGGGAAGCTCAGGAGGAGGGAGAGTTTGGAGACGACGG
845	ACCACGTCTCACACCGGGCTGAGGAAGCTGAGGAGGGTTTTAGAGCTAGAAATAGCAAGTTAAAATAAGGCTAGTCCGTTATCAACTTGAAAAACTGGCACCGAGTCGGTGCTTTTTTAACTTAGAACAGTTTAGGAAGATGAGGAGGAGGAAGAGTTTGGAGACGACGG
846	ACCACGTCTCACACCGGGCTGAGGAAGCTGAGGAGGGTTTTAGAGCTAGAAATAGCAAGTTAAAATAAGGCTAGTCCGTTATCAACTTGAAAAACTGGCACCGAGTCGGTGCTTTTTTAACTTAGCACATCTGAAGAAGCTGAGGAGAAGGAAAAGTTTGGAGACGACGG
847	ACCACGTCTCACACCGGGCTGAGGAAGCTGAGGAGGGTTTTAGAGCTAGAAATAGCAAGTTAAAATAAGGCTAGTCCGTTATCAACTTGAAAAACTGGCACCGAGTCGGTGCTTTTTTAACTTATGACCACTCAGGAAGCTGAGGTGGTGGATTGGTTTGGAGACGACGG
848	ACCACGTCTCACACCGGGCTGAGGAAGCTGAGGAGGGTTTTAGAGCTAGAAATAGCAAGTTAAAATAAGGCTAGTCCGTTATCAACTTGAAAAACTGGCACCGAGTCGGTGCTTTTTTAACTTATTACCACTCAGGAGGCTGAGGAGGTGGGAGGGTTTGGAGACGACGG
849	ACCACGTCTCACACCGGGCTGAGGAAGCTGAGGAGGGTTTTAGAGCTAGAAATAGCAAGTTAAAATAAGGCTAGTCCGTTATCAACTTGAAAAACTGGCACCGAGTCGGTGCTTTTTTAACTTCCTACCACTGAGGAAGAAGAGGAGGAGGACGAGTTTGGAGACGACGG
850	ACCACGTCTCACACCGGGCTGAGGAAGCTGAGGAGGGTTTTAGAGCTAGAAATAGCAAGTTAAAATAAGGCTAGTCCGTTATCAACTTGAAAAACTGGCACCGAGTCGGTGCTTTTTTAACTTCGAACCACTGAGGAGGCTGAGGAGGAGGAGGAGTTTGGAGACGACGG
851	ACCACGTCTCACACCGGGCTGAGGAAGCTGAGGAGGGTTTTAGAGCTAGAAATAGCAAGTTAAAATAAGGCTAGTCCGTTATCAACTTGAAAAACTGGCACCGAGTCGGTGCTTTTTTAACTTGCTACCAGAGAGGAAGCTGAGGAGGTGGGAAGGTTTGGAGACGACGG
852	ACCACGTCTCACACCGGGCTGAGGAAGCTGAGGAGGGTTTTAGAGCTAGAAATAGCAAGTTAAAATAAGGCTAGTCCGTTATCAACTTGAAAAACTGGCACCGAGTCGGTGCTTTTTTAACTTGGTACCCCTGAGGAAGCTGGGGAGGCGGGGCTGTTTGGAGACGACGG
853	ACCACGTCTCACACCGGGCTGAGGAAGCTGAGGAGGGTTTTAGAGCTAGAAATAGCAAGTTAAAATAAGGCTAGTCCGTTATCAACTTGAAAAACTGGCACCGAGTCGGTGCTTTTTTAACTTGTAACCCCTGAGGAGGCTGAGGTGGAGGATTGGTTTGGAGACGACGG
854	ACCACGTCTCACACCGGGCTGAGGAAGCTGAGGAGGGTTTTAGAGCTAGAAATAGCAAGTTAAAATAAGGCTAGTCCGTTATCAACTTGAAAAACTGGCACCGAGTCGGTGCTTTTTTAACTTGTCACCCCTGAGGCAGCTGAGGAGGGGGCTCAGTTTGGAGACGACGG
856	ACCACGTCTCACACCGGGCTGAGGAAGCTGAGGAGGGTTTTAGAGCTAGAAATAGCAAGTTAAAATAAGGCTAGTCCGTTATCAACTTGAAAAACTGGCACCGAGTCGGTGCTTTTTTAAGAACCAACCGAGGAGGAGGCTGAGGAGGAGGTGGCGTTTGGAGACGACGG
857	ACCACGTCTCACACCGGGCTGAGGAAGCTGAGGAGGGTTTTAGAGCTAGAAATAGCAAGTTAAAATAAGGCTAGTCCGTTATCAACTTGAAAAACTGGCACCGAGTCGGTGCTTTTTTAAGAACGAACCGCAGAGCAAGCTGAGCAGGGGGCTGGGTTTGGAGACGACGG
859	ACCACGTCTCACACCGGGCTGAGGAAGCTGAGGAGGGTTTTAGAGCTAGAAATAGCAAGTTAAAATAAGGCTAGTCCGTTATCAACTTGAAAAACTGGCACCGAGTCGGTGCTTTTTTAAGAACTAACCGCTGAGGAGGAGGAGGAGGCGGAGGAGTTTGGAGACGACGG
860	ACCACGTCTCACACCGGGCTGAGGAAGCTGAGGAGGGTTTTAGAGCTAGAAATAGCAAGTTAAAATAAGGCTAGTCCGTTATCAACTTGAAAAACTGGCACCGAGTCGGTGCTTTTTTAAGAAGATACCGCTGAGGAGGGTGAGGCGGTGGCCCTGTTTGGAGACGACGG
861	ACCACGTCTCACACCGGGCTGAGGAAGCTGAGGAGGGTTTTAGAGCTAGAAATAGCAAGTTAAAATAAGGCTAGTCCGTTATCAACTTGAAAAACTGGCACCGAGTCGGTGCTTTTTTAAGAATACACCGTTGAGGAGGCTAAGGAGGAGGAGGAGTTTGGAGACGACGG
862	ACCACGTCTCACACCGGGCTGAGGAAGCTGAGGAGGGTTTTAGAGCTAGAAATAGCAAGTTAAAATAAGGCTAGTCCGTTATCAACTTGAAAAACTGGCACCGAGTCGGTGCTTTTTTAAGAATAGACCGTTGAGGAGGCTGAGGAGAAGGAGGAGTTTGGAGACGACGG
863	ACCACGTCTCACACCGGGCTGAGGAAGCTGAGGAGGGTTTTAGAGCTAGAAATAGCAAGTTAAAATAAGGCTAGTCCGTTATCAACTTGAAAAACTGGCACCGAGTCGGTGCTTTTTTAAGAATATACCGTTGAGTAAGCTGAGGAAGAGGAAGAGTTTGGAGACGACGG
864	ACCACGTCTCACACCGGGCTGAGGAAGCTGAGGAGGGTTTTAGAGCTAGAAATAGCAAGTTAAAATAAGGCTAGTCCGTTATCAACTTGAAAAACTGGCACCGAGTCGGTGCTTTTTTAAGACATGACCTCTGAGGAAGATGAGGACGAGGTAGGGTTTGGAGACGACGG
865	ACCACGTCTCACACCGGGCTGAGGAAGCTGAGGAGGGTTTTAGAGCTAGAAATAGCAAGTTAAAATAAGGCTAGTCCGTTATCAACTTGAAAAACTGGCACCGAGTCGGTGCTTTTTTAAGACCACACGAAGGAGGAAGCGGAGGAGGAGGAGGAGTTTGGAGACGACGG
866	ACCACGTCTCACACCGGGCTGAGGAAGCTGAGGAGGGTTTTAGAGCTAGAAATAGCAAGTTAAAATAAGGCTAGTCCGTTATCAACTTGAAAAACTGGCACCGAGTCGGTGCTTTTTTAAGACCAGACGAAGGAGGAAGCTGATGAGGAGGGAGAGTTTGGAGACGACGG
867	ACCACGTCTCACACCGGGCTGAGGAAGCTGAGGAGGGTTTTAGAGCTAGAAATAGCAAGTTAAAATAAGGCTAGTCCGTTATCAACTTGAAAAACTGGCACCGAGTCGGTGCTTTTTTAAGACCATACGAATGAGGAAGAAGAGGAGGAGGAGGAGTTTGGAGACGACGG
870	ACCACGTCTCACACCGGGCTGAGGAAGCTGAGGAGGGTTTTAGAGCTAGAAATAGCAAGTTAAAATAAGGCTAGTCCGTTATCAACTTGAAAAACTGGCACCGAGTCGGTGCTTTTTTAAGACCTTACGACTAAGGAGGCTGAGGTGGGGGGGGAGTTTGGAGACGACGG
872	ACCACGTCTCACACCGGGCTGAGGAAGCTGAGGAGGGTTTTAGAGCTAGAAATAGCAAGTTAAAATAAGGCTAGTCCGTTATCAACTTGAAAAACTGGCACCGAGTCGGTGCTTTTTTAAGACGGCACGACTGAGCACTCTGAGGAGGAGGCTGAGTTTGGAGACGACGG
873	ACCACGTCTCACACCGGGCTGAGGAAGCTGAGGAGGGTTTTAGAGCTAGAAATAGCAAGTTAAAATAAGGCTAGTCCGTTATCAACTTGAAAAACTGGCACCGAGTCGGTGCTTTTTTAAGACGTCACGACTGAGCAGGCTTAGGAGGTGGGAGCGTTTGGAGACGACGG
874	ACCACGTCTCACACCGGGCTGAGGAAGCTGAGGAGGGTTTTAGAGCTAGAAATAGCAAGTTAAAATAAGGCTAGTCCGTTATCAACTTGAAAAACTGGCACCGAGTCGGTGCTTTTTTAAGACGTTACGACTGAGGAAGAGAAGGAGGTGGTCAGGTTTGGAGACGACGG
875	ACCACGTCTCACACCGGGCTGAGGAAGCTGAGGAGGGTTTTAGAGCTAGAAATAGCAAGTTAAAATAAGGCTAGTCCGTTATCAACTTGAAAAACTGGCACCGAGTCGGTGCTTTTTTAAGACTGCACGACTGAGGAAGAGGAGGAGTTGGTCTTGTTTGGAGACGACGG
876	ACCACGTCTCACACCGGGCTGAGGAAGCTGAGGAGGGTTTTAGAGCTAGAAATAGCAAGTTAAAATAAGGCTAGTCCGTTATCAACTTGAAAAACTGGCACCGAGTCGGTGCTTTTTTAAGACTGGACGACTGAGGAAGATGAGGAGGAGGAAGAGTTTGGAGACGACGG
877	ACCACGTCTCACACCGGGCTGAGGAAGCTGAGGAGGGTTTTAGAGCTAGAAATAGCAAGTTAAAATAAGGCTAGTCCGTTATCAACTTGAAAAACTGGCACCGAGTCGGTGCTTTTTTAAGAGACTACGACTGAGGAGGCCGGGGAGGAGGGTGAGTTTGGAGACGACGG
878	ACCACGTCTCACACCGGGCTGAGGAAGCTGAGGAGGGTTTTAGAGCTAGAAATAGCAAGTTAAAATAAGGCTAGTCCGTTATCAACTTGAAAAACTGGCACCGAGTCGGTGCTTTTTTAAGAGATAACGACTGAGGCTGCTGAAGAGGTGGATTTGTTTGGAGACGACGG
879	ACCACGTCTCACACCGGGCTGAGGAAGCTGAGGAGGGTTTTAGAGCTAGAAATAGCAAGTTAAAATAAGGCTAGTCCGTTATCAACTTGAAAAACTGGCACCGAGTCGGTGCTTTTTTAAGAGATCACGACTGCGGTAGTTGAGGAGGTGGGGTAGTTTGGAGACGACGG
880	ACCACGTCTCACACCGGGCTGAGGAAGCTGAGGAGGGTTTTAGAGCTAGAAATAGCAAGTTAAAATAAGGCTAGTCCGTTATCAACTTGAAAAACTGGCACCGAGTCGGTGCTTTTTTAAGAGATTACGACTTAAGAAGCTGAGGAGCTGGTGGTGTTTGGAGACGACGG
881	ACCACGTCTCACACCGGGCTGAGGAAGCTGAGGAGGGTTTTAGAGCTAGAAATAGCAAGTTAAAATAAGGCTAGTCCGTTATCAACTTGAAAAACTGGCACCGAGTCGGTGCTTTTTTAAGAGCCGACGAGTAAGGAATCTGAGGAGGAGGCCATGTTTGGAGACGACGG
882	ACCACGTCTCACACCGGGCTGAGGAAGCTGAGGAGGGTTTTAGAGCTAGAAATAGCAAGTTAAAATAAGGCTAGTCCGTTATCAACTTGAAAAACTGGCACCGAGTCGGTGCTTTTTTAAGAGCCTACGAGTGAGAAAGCGGAGGAGGAGGTTGGGTTTGGAGACGACGG
883	ACCACGTCTCACACCGGGCTGAGGAAGCTGAGGAGGGTTTTAGAGCTAGAAATAGCAAGTTAAAATAAGGCTAGTCCGTTATCAACTTGAAAAACTGGCACCGAGTCGGTGCTTTTTTAAGAGCGAACGAGTGAGGCAGCTGGGGAGGTGGGATAGTTTGGAGACGACGG
884	ACCACGTCTCACACCGGGCTGAGGAAGCTGAGGAGGGTTTTAGAGCTAGAAATAGCAAGTTAAAATAAGGCTAGTCCGTTATCAACTTGAAAAACTGGCACCGAGTCGGTGCTTTTTTAAGAGCTGACGATTTAGGAAGCTGAGGTGGAGGATCAGTTTGGAGACGACGG
886	ACCACGTCTCACACCGGGCTGAGGAAGCTGAGGAGGGTTTTAGAGCTAGAAATAGCAAGTTAAAATAAGGCTAGTCCGTTATCAACTTGAAAAACTGGCACCGAGTCGGTGCTTTTTTAAGAGGACACGCAGGAGAAAGCTGAGGAGGTGGCTGCGTTTGGAGACGACGG
887	ACCACGTCTCACACCGGGCTGAGGAAGCTGAGGAGGGTTTTAGAGCTAGAAATAGCAAGTTAAAATAAGGCTAGTCCGTTATCAACTTGAAAAACTGGCACCGAGTCGGTGCTTTTTTAAGAGGCAACGCCAGAGGAAGCTGTGGAAGTGGGATGGTTTGGAGACGACGG
889	ACCACGTCTCACACCGGGCTGAGGAAGCTGAGGAGGGTTTTAGAGCTAGAAATAGCAAGTTAAAATAAGGCTAGTCCGTTATCAACTTGAAAAACTGGCACCGAGTCGGTGCTTTTTTAAGAGGTGACGCCGGAGGAAGAGGAGGAGGAGGCGGCGTTTGGAGACGACGG
891	ACCACGTCTCACACCGGGCTGAGGAAGCTGAGGAGGGTTTTAGAGCTAGAAATAGCAAGTTAAAATAAGGCTAGTCCGTTATCAACTTGAAAAACTGGCACCGAGTCGGTGCTTTTTTAAGAGTACACGCCGGAGGAGGCTGACGAGGAGGAGGAGTTTGGAGACGACGG
892	ACCACGTCTCACACCGGGCTGAGGAAGCTGAGGAGGGTTTTAGAGCTAGAAATAGCAAGTTAAAATAAGGCTAGTCCGTTATCAACTTGAAAAACTGGCACCGAGTCGGTGCTTTTTTAAGAGTAGACGCCTGAAGAAGCTGAGGTGGGGGATGAGTTTGGAGACGACGG
893	ACCACGTCTCACACCGGGCTGAGGAAGCTGAGGAGGGTTTTAGAGCTAGAAATAGCAAGTTAAAATAAGGCTAGTCCGTTATCAACTTGAAAAACTGGCACCGAGTCGGTGCTTTTTTAAGAGTCAACGCCTGAGAAAGGAGAGGAGGAGGAGCGGTTTGGAGACGACGG
894	ACCACGTCTCACACCGGGCTGAGGAAGCTGAGGAGGGTTTTAGAGCTAGAAATAGCAAGTTAAAATAAGGCTAGTCCGTTATCAACTTGAAAAACTGGCACCGAGTCGGTGCTTTTTTAAGAGTCCACGCCTGAGGAAGAGGGGGAGGAGGCAGCGTTTGGAGACGACGG
895	ACCACGTCTCACACCGGGCTGAGGAAGCTGAGGAGGGTTTTAGAGCTAGAAATAGCAAGTTAAAATAAGGCTAGTCCGTTATCAACTTGAAAAACTGGCACCGAGTCGGTGCTTTTTTAAGAGTGAACGCCTGAGGAAGCGGAGCCGGGGGGCCAGTTTGGAGACGACGG
896	ACCACGTCTCACACCGGGCTGAGGAAGCTGAGGAGGGTTTTAGAGCTAGAAATAGCAAGTTAAAATAAGGCTAGTCCGTTATCAACTTGAAAAACTGGCACCGAGTCGGTGCTTTTTTAAGAGTGGACGCCTGAGGAAGCTGAAGCAGAGGTTTCGTTTGGAGACGACGG
898	ACCACGTCTCACACCGGGCTGAGGAAGCTGAGGAGGGTTTTAGAGCTAGAAATAGCAAGTTAAAATAAGGCTAGTCCGTTATCAACTTGAAAAACTGGCACCGAGTCGGTGCTTTTTTAAGAGTTCACGCCTGAGGAAGCTGGGGTGGAGGATGGGTTTGGAGACGACGG
899	ACCACGTCTCACACCGGGCTGAGGAAGCTGAGGAGGGTTTTAGAGCTAGAAATAGCAAGTTAAAATAAGGCTAGTCCGTTATCAACTTGAAAAACTGGCACCGAGTCGGTGCTTTTTTAAGATAACACGCCTGAGGACGAAGAGGAGGAGGAAGAGTTTGGAGACGACGG
900	ACCACGTCTCACACCGGGCTGAGGAAGCTGAGGAGGGTTTTAGAGCTAGAAATAGCAAGTTAAAATAAGGCTAGTCCGTTATCAACTTGAAAAACTGGCACCGAGTCGGTGCTTTTTTAAGATAATACGCCTGAGGCAGCAGAGGAGTTGGACTTGTTTGGAGACGACGG
901	ACCACGTCTCACACCGGGCTGAGGAAGCTGAGGAGGGTTTTAGAGCTAGAAATAGCAAGTTAAAATAAGGCTAGTCCGTTATCAACTTGAAAAACTGGCACCGAGTCGGTGCTTTTTTAAGATAGAACGCCTGTGGAAGCTGTGGTGGTGGAGGTGTTTGGAGACGACGG
902	ACCACGTCTCACACCGGGCTGAGGAAGCTGAGGAGGGTTTTAGAGCTAGAAATAGCAAGTTAAAATAAGGCTAGTCCGTTATCAACTTGAAAAACTGGCACCGAGTCGGTGCTTTTTTAAGATAGCACGCCTGTGGGGGCTGAGGAGGAGGGGAGGTTTGGAGACGACGG
903	ACCACGTCTCACACCGGGCTGAGGAAGCTGAGGAGGGTTTTAGAGCTAGAAATAGCAAGTTAAAATAAGGCTAGTCCGTTATCAACTTGAAAAACTGGCACCGAGTCGGTGCTTTTTTAAGATAGTACGCTAGAGTAAGCTGAGGAGGTGGGCGGGTTTGGAGACGACGG
904	ACCACGTCTCACACCGGGCTGAGGAAGCTGAGGAGGGTTTTAGAGCTAGAAATAGCAAGTTAAAATAAGGCTAGTCCGTTATCAACTTGAAAAACTGGCACCGAGTCGGTGCTTTTTTAAGATATTACGCTGGAGGAAGCTGAGGGGGAGGGGTGGTTTGGAGACGACGG
906	ACCACGTCTCACACCGGGCTGAGGAAGCTGAGGAGGGTTTTAGAGCTAGAAATAGCAAGTTAAAATAAGGCTAGTCCGTTATCAACTTGAAAAACTGGCACCGAGTCGGTGCTTTTTTAAGCAGGAACGGAAGAGGAAGATAAGGAGGAGGAGGAGTTTGGAGACGACGG
909	ACCACGTCTCACACCGGGCTGAGGAAGCTGAGGAGGGTTTTAGAGCTAGAAATAGCAAGTTAAAATAAGGCTAGTCCGTTATCAACTTGAAAAACTGGCACCGAGTCGGTGCTTTTTTAAGCATAGACGGAAGAGGAAGCTGAGGGTGTGGATTGGTTTGGAGACGACGG
910	ACCACGTCTCACACCGGGCTGAGGAAGCTGAGGAGGGTTTTAGAGCTAGAAATAGCAAGTTAAAATAAGGCTAGTCCGTTATCAACTTGAAAAACTGGCACCGAGTCGGTGCTTTTTTAAGCATTGACGGAAGAGGAGGCGGAGGAGGAGGAGGAGTTTGGAGACGACGG
912	ACCACGTCTCACACCGGGCTGAGGAAGCTGAGGAGGGTTTTAGAGCTAGAAATAGCAAGTTAAAATAAGGCTAGTCCGTTATCAACTTGAAAAACTGGCACCGAGTCGGTGCTTTTTTAAGCCACAACGGAAGAGGTAGCGGAGGAGGAGGTAGTGTTTGGAGACGACGG
913	ACCACGTCTCACACCGGGCTGAGGAAGCTGAGGAGGGTTTTAGAGCTAGAAATAGCAAGTTAAAATAAGGCTAGTCCGTTATCAACTTGAAAAACTGGCACCGAGTCGGTGCTTTTTTAAGCCACCACGGAAGATGAAGCTGAGGAGGAGGACGGGTTTGGAGACGACGG
914	ACCACGTCTCACACCGGGCTGAGGAAGCTGAGGAGGGTTTTAGAGCTAGAAATAGCAAGTTAAAATAAGGCTAGTCCGTTATCAACTTGAAAAACTGGCACCGAGTCGGTGCTTTTTTAAGCCACTACGGAAGGGGAAGCCGAGGAGGAGGAAGAGTTTGGAGACGACGG
915	ACCACGTCTCACACCGGGCTGAGGAAGCTGAGGAGGGTTTTAGAGCTAGAAATAGCAAGTTAAAATAAGGCTAGTCCGTTATCAACTTGAAAAACTGGCACCGAGTCGGTGCTTTTTTAAGCCGATACGGACGAGGAGACTGAGGAGGCGGCGGCGTTTGGAGACGACGG
916	ACCACGTCTCACACCGGGCTGAGGAAGCTGAGGAGGGTTTTAGAGCTAGAAATAGCAAGTTAAAATAAGGCTAGTCCGTTATCAACTTGAAAAACTGGCACCGAGTCGGTGCTTTTTTAAGCCGCAACGGACGAGGAGGATGAGGAGGGGGAGAGGTTTGGAGACGACGG
918	ACCACGTCTCACACCGGGCTGAGGAAGCTGAGGAGGGTTTTAGAGCTAGAAATAGCAAGTTAAAATAAGGCTAGTCCGTTATCAACTTGAAAAACTGGCACCGAGTCGGTGCTTTTTTAAGCCTAGACGGAGGAAGAAGCGGAGGAGGCGGCTCCGTTTGGAGACGACGG
919	ACCACGTCTCACACCGGGCTGAGGAAGCTGAGGAGGGTTTTAGAGCTAGAAATAGCAAGTTAAAATAAGGCTAGTCCGTTATCAACTTGAAAAACTGGCACCGAGTCGGTGCTTTTTTAAGCCTCAACGGAGGAGAAAGATGAGGAGGAGGAAGAGTTTGGAGACGACGG
920	ACCACGTCTCACACCGGGCTGAGGAAGCTGAGGAGGGTTTTAGAGCTAGAAATAGCAAGTTAAAATAAGGCTAGTCCGTTATCAACTTGAAAAACTGGCACCGAGTCGGTGCTTTTTTAAGCCTCCACGGAGGAGCAAGCTGAGGATGTGGCCTAGTTTGGAGACGACGG
921	ACCACGTCTCACACCGGGCTGAGGAAGCTGAGGAGGGTTTTAGAGCTAGAAATAGCAAGTTAAAATAAGGCTAGTCCGTTATCAACTTGAAAAACTGGCACCGAGTCGGTGCTTTTTTAAGGTAGCACAAGTGAGGAGGCTGAGGAGGGGGACGAGTTTGGAGACGACGG
922	ACCACGTCTCACACCGGGCTGAGGAAGCTGAGGAGGGTTTTAGAGCTAGAAATAGCAAGTTAAAATAAGGCTAGTCCGTTATCAACTTGAAAAACTGGCACCGAGTCGGTGCTTTTTTAAGGTATAACACTTCAGGAAGCTGAGGAGGAGGATCAGTTTGGAGACGACGG
923	ACCACGTCTCACACCGGGCTGAGGAAGCTGAGGAGGGTTTTAGAGCTAGAAATAGCAAGTTAAAATAAGGCTAGTCCGTTATCAACTTGAAAAACTGGCACCGAGTCGGTGCTTTTTTAAGGTATCACACTTGAGGAGGCTGAGGAGGAGGAAGGGTTTGGAGACGACGG
925	ACCACGTCTCACACCGGGCTGAGGAAGCTGAGGAGGGTTTTAGAGCTAGAAATAGCAAGTTAAAATAAGGCTAGTCCGTTATCAACTTGAAAAACTGGCACCGAGTCGGTGCTTTTTTAAGGTCCTACAGATGAGGAAACTGAGGAGTGGGATAGGTTTGGAGACGACGG
926	ACCACGTCTCACACCGGGCTGAGGAAGCTGAGGAGGGTTTTAGAGCTAGAAATAGCAAGTTAAAATAAGGCTAGTCCGTTATCAACTTGAAAAACTGGCACCGAGTCGGTGCTTTTTTAAGGTGAGACAGATGAGGAAGATGATGAGGAGGATTCGTTTGGAGACGACGG
928	ACCACGTCTCACACCGGGCTGAGGAAGCTGAGGAGGGTTTTAGAGCTAGAAATAGCAAGTTAAAATAAGGCTAGTCCGTTATCAACTTGAAAAACTGGCACCGAGTCGGTGCTTTTTTAAGGTTGTACAGCCGTGGAGGCTGAGGAGGTGGAGGCGTTTGGAGACGACGG
929	ACCACGTCTCACACCGGGCTGAGGAAGCTGAGGAGGGTTTTAGAGCTAGAAATAGCAAGTTAAAATAAGGCTAGTCCGTTATCAACTTGAAAAACTGGCACCGAGTCGGTGCTTTTTTAAGTAACAACAGCGGAGGAAGGGGAGGAGGAGGAGGAGTTTGGAGACGACGG
930	ACCACGTCTCACACCGGGCTGAGGAAGCTGAGGAGGGTTTTAGAGCTAGAAATAGCAAGTTAAAATAAGGCTAGTCCGTTATCAACTTGAAAAACTGGCACCGAGTCGGTGCTTTTTTAAGTAACGACAGCGGAGGCAGCTGAGGCGGCGGCGGCGTTTGGAGACGACGG
931	ACCACGTCTCACACCGGGCTGAGGAAGCTGAGGAGGGTTTTAGAGCTAGAAATAGCAAGTTAAAATAAGGCTAGTCCGTTATCAACTTGAAAAACTGGCACCGAGTCGGTGCTTTTTTAAGTAATAACAGCTAAGGAAGCTCAGGAGCGGGAACTGTTTGGAGACGACGG
932	ACCACGTCTCACACCGGGCTGAGGAAGCTGAGGAGGGTTTTAGAGCTAGAAATAGCAAGTTAAAATAAGGCTAGTCCGTTATCAACTTGAAAAACTGGCACCGAGTCGGTGCTTTTTTAAGTAATTACAGCTCAGCAAGCTGAGGATGTGGTTCAGTTTGGAGACGACGG
933	ACCACGTCTCACACCGGGCTGAGGAAGCTGAGGAGGGTTTTAGAGCTAGAAATAGCAAGTTAAAATAAGGCTAGTCCGTTATCAACTTGAAAAACTGGCACCGAGTCGGTGCTTTTTTAAGTACACACAGCTGAAACAGCTGAGGAGGAGGACTGGTTTGGAGACGACGG
934	ACCACGTCTCACACCGGGCTGAGGAAGCTGAGGAGGGTTTTAGAGCTAGAAATAGCAAGTTAAAATAAGGCTAGTCCGTTATCAACTTGAAAAACTGGCACCGAGTCGGTGCTTTTTTAAGTACCAACAGCTGAAGAAGCTGAGGAAGTGGCTGGGTTTGGAGACGACGG
935	ACCACGTCTCACACCGGGCTGAGGAAGCTGAGGAGGGTTTTAGAGCTAGAAATAGCAAGTTAAAATAAGGCTAGTCCGTTATCAACTTGAAAAACTGGCACCGAGTCGGTGCTTTTTTAAGTACCGACAGCTGAAGAGGCTGAGGAGCAGGACTGGTTTGGAGACGACGG
936	ACCACGTCTCACACCGGGCTGAGGAAGCTGAGGAGGGTTTTAGAGCTAGAAATAGCAAGTTAAAATAAGGCTAGTCCGTTATCAACTTGAAAAACTGGCACCGAGTCGGTGCTTTTTTAAGTACCTACAGCTGAGAAAGCTGAGGCTGAGGGCGAGTTTGGAGACGACGG
937	ACCACGTCTCACACCGGGCTGAGGAAGCTGAGGAGGGTTTTAGAGCTAGAAATAGCAAGTTAAAATAAGGCTAGTCCGTTATCAACTTGAAAAACTGGCACCGAGTCGGTGCTTTTTTAAGTACGCACAGCTGAGAGTGCTGAGGAGGTGGGAATGTTTGGAGACGACGG
938	ACCACGTCTCACACCGGGCTGAGGAAGCTGAGGAGGGTTTTAGAGCTAGAAATAGCAAGTTAAAATAAGGCTAGTCCGTTATCAACTTGAAAAACTGGCACCGAGTCGGTGCTTTTTTAAGTACTAACAGCTGAGGAAACTGAGGATCAGGGAGGGTTTGGAGACGACGG
939	ACCACGTCTCACACCGGGCTGAGGAAGCTGAGGAGGGTTTTAGAGCTAGAAATAGCAAGTTAAAATAAGGCTAGTCCGTTATCAACTTGAAAAACTGGCACCGAGTCGGTGCTTTTTTAAGTAGATACAGCTGAGGAACCTGTGGAAGAGGAGGAGTTTGGAGACGACGG
940	ACCACGTCTCACACCGGGCTGAGGAAGCTGAGGAGGGTTTTAGAGCTAGAAATAGCAAGTTAAAATAAGGCTAGTCCGTTATCAACTTGAAAAACTGGCACCGAGTCGGTGCTTTTTTAAGTAGCGACAGCTGAGGAAGCTAAGAATGAGGTTGAGTTTGGAGACGACGG
941	ACCACGTCTCACACCGGGCTGAGGAAGCTGAGGAGGGTTTTAGAGCTAGAAATAGCAAGTTAAAATAAGGCTAGTCCGTTATCAACTTGAAAAACTGGCACCGAGTCGGTGCTTTTTTAAGTAGCTACAGCTGAGGAAGCTGTGGGGAGGGGGCAGTTTGGAGACGACGG
942	ACCACGTCTCACACCGGGCTGAGGAAGCTGAGGAGGGTTTTAGAGCTAGAAATAGCAAGTTAAAATAAGGCTAGTCCGTTATCAACTTGAAAAACTGGCACCGAGTCGGTGCTTTTTTAAGTAGGAACAGCTGAGGAAGCTGTGGGGCAGGGGGGGTTTGGAGACGACGG
943	ACCACGTCTCACACCGGGCTGAGGAAGCTGAGGAGGGTTTTAGAGCTAGAAATAGCAAGTTAAAATAAGGCTAGTCCGTTATCAACTTGAAAAACTGGCACCGAGTCGGTGCTTTTTTAAGTAGGTACAGCTGAGGAGGAAGAGGAGGAGGGGTTGTTTGGAGACGACGG
944	ACCACGTCTCACACCGGGCTGAGGAAGCTGAGGAGGGTTTTAGAGCTAGAAATAGCAAGTTAAAATAAGGCTAGTCCGTTATCAACTTGAAAAACTGGCACCGAGTCGGTGCTTTTTTAAGTAGTGACAGCTGAGGAGGCTGAGAAAGAGGCTTCGTTTGGAGACGACGG
946	ACCACGTCTCACACCGGGCTGAGGAAGCTGAGGAGGGTTTTAGAGCTAGAAATAGCAAGTTAAAATAAGGCTAGTCCGTTATCAACTTGAAAAACTGGCACCGAGTCGGTGCTTTTTTAAGTATACACAGCTGAGGATGCTGAAGGGGAGGCCAGGTTTGGAGACGACGG
947	ACCACGTCTCACACCGGGCTGAGGAAGCTGAGGAGGGTTTTAGAGCTAGAAATAGCAAGTTAAAATAAGGCTAGTCCGTTATCAACTTGAAAAACTGGCACCGAGTCGGTGCTTTTTTAAGTATAGACAGCTGAGGCAGTTGAGGAGGAGGAAGGGTTTGGAGACGACGG
948	ACCACGTCTCACACCGGGCTGAGGAAGCTGAGGAGGGTTTTAGAGCTAGAAATAGCAAGTTAAAATAAGGCTAGTCCGTTATCAACTTGAAAAACTGGCACCGAGTCGGTGCTTTTTTAAGTATCCACAGCTGATGAAACTGAGGAGGGGGTACTGTTTGGAGACGACGG
949	ACCACGTCTCACACCGGGCTGAGGAAGCTGAGGAGGGTTTTAGAGCTAGAAATAGCAAGTTAAAATAAGGCTAGTCCGTTATCAACTTGAAAAACTGGCACCGAGTCGGTGCTTTTTTAAGTATCGACAGCTGATGAAGCTGAGGAGGGGGTAGGGTTTGGAGACGACGG
950	ACCACGTCTCACACCGGGCTGAGGAAGCTGAGGAGGGTTTTAGAGCTAGAAATAGCAAGTTAAAATAAGGCTAGTCCGTTATCAACTTGAAAAACTGGCACCGAGTCGGTGCTTTTTTAAGTATGCACAGCTGCGGAAGCTGAAGATGAGGGCTCGTTTGGAGACGACGG
952	ACCACGTCTCACACCGGGCTGAGGAAGCTGAGGAGGGTTTTAGAGCTAGAAATAGCAAGTTAAAATAAGGCTAGTCCGTTATCAACTTGAAAAACTGGCACCGAGTCGGTGCTTTTTTAAGTATTAACAGCTGGGGAAACTGAGGAGCTGGGAAAGTTTGGAGACGACGG
953	ACCACGTCTCACACCGGGCTGAGGAAGCTGAGGAGGGTTTTAGAGCTAGAAATAGCAAGTTAAAATAAGGCTAGTCCGTTATCAACTTGAAAAACTGGCACCGAGTCGGTGCTTTTTTAAGTCAAGACAGCTGGGGAAGCTAGGGAGGAGGGAGAGTTTGGAGACGACGG
954	ACCACGTCTCACACCGGGCTGAGGAAGCTGAGGAGGGTTTTAGAGCTAGAAATAGCAAGTTAAAATAAGGCTAGTCCGTTATCAACTTGAAAAACTGGCACCGAGTCGGTGCTTTTTTAAGTCACAACAGCTGTGGAAGCTGGGGTGGAGGCCCAGTTTGGAGACGACGG
955	ACCACGTCTCACACCGGGCTGAGGAAGCTGAGGAGGGTTTTAGAGCTAGAAATAGCAAGTTAAAATAAGGCTAGTCCGTTATCAACTTGAAAAACTGGCACCGAGTCGGTGCTTTTTTAAGTCACCACAGCTTAGGAAACTGAAGAGGAGGAAACGTTTGGAGACGACGG
957	ACCACGTCTCACACCGGGCTGAGGAAGCTGAGGAGGGTTTTAGAGCTAGAAATAGCAAGTTAAAATAAGGCTAGTCCGTTATCAACTTGAAAAACTGGCACCGAGTCGGTGCTTTTTTAAGTCATAACAGTTATGGAAGCTGAGGAGGAGGCTGTGTTTGGAGACGACGG
958	ACCACGTCTCACACCGGGCTGAGGAAGCTGAGGAGGGTTTTAGAGCTAGAAATAGCAAGTTAAAATAAGGCTAGTCCGTTATCAACTTGAAAAACTGGCACCGAGTCGGTGCTTTTTTAAGTCATCACAGTTGAGGAAGCTGAGGCAGTGGGGTGGTTTGGAGACGACGG
959	ACCACGTCTCACACCGGGCTGAGGAAGCTGAGGAGGGTTTTAGAGCTAGAAATAGCAAGTTAAAATAAGGCTAGTCCGTTATCAACTTGAAAAACTGGCACCGAGTCGGTGCTTTTTTAAGTCCGCACAGTTGATGAAGCTGAGAAGGAGGCTTCGTTTGGAGACGACGG
960	ACCACGTCTCACACCGGGCTGAGGAAGCTGAGGAGGGTTTTAGAGCTAGAAATAGCAAGTTAAAATAAGGCTAGTCCGTTATCAACTTGAAAAACTGGCACCGAGTCGGTGCTTTTTTAAGTCCTCACATGTGGGGAAGCTGAGGAGGAGGGAAGGTTTGGAGACGACGG
961	ACCACGTCTCACACCGGGCTGAGGAAGCTGAGGAGGGTTTTAGAGCTAGAAATAGCAAGTTAAAATAAGGCTAGTCCGTTATCAACTTGAAAAACTGGCACCGAGTCGGTGCTTTTTTAAGTCGAGACCACTCAGGAAGCTGAGGAGGAGGACTGGTTTGGAGACGACGG
962	ACCACGTCTCACACCGGGCTGAGGAAGCTGAGGAGGGTTTTAGAGCTAGAAATAGCAAGTTAAAATAAGGCTAGTCCGTTATCAACTTGAAAAACTGGCACCGAGTCGGTGCTTTTTTAAGTCGCCACCACTCAGGAGGCTGAGGAGGAGGACTGGTTTGGAGACGACGG
963	ACCACGTCTCACACCGGGCTGAGGAAGCTGAGGAGGGTTTTAGAGCTAGAAATAGCAAGTTAAAATAAGGCTAGTCCGTTATCAACTTGAAAAACTGGCACCGAGTCGGTGCTTTTTTAAGTCGGTACCACTGAGGAAGCTGAGGGGTGGGGAATGTTTGGAGACGACGG
964	ACCACGTCTCACACCGGGCTGAGGAAGCTGAGGAGGGTTTTAGAGCTAGAAATAGCAAGTTAAAATAAGGCTAGTCCGTTATCAACTTGAAAAACTGGCACCGAGTCGGTGCTTTTTTAAGTCGTTACCACTGAGGGAGCTGAGGAGCCGGGGCCGTTTGGAGACGACGG
965	ACCACGTCTCACACCGGGCTGAGGAAGCTGAGGAGGGTTTTAGAGCTAGAAATAGCAAGTTAAAATAAGGCTAGTCCGTTATCAACTTGAAAAACTGGCACCGAGTCGGTGCTTTTTTAAGTGCATACCCCTGAGGAAGCAGAGCAGGAGGACACGTTTGGAGACGACGG
969	ACCACGTCTCACACCGGGCTGAGGAAGCTGAGGAGGGTTTTAGAGCTAGAAATAGCAAGTTAAAATAAGGCTAGTCCGTTATCAACTTGAAAAACTGGCACCGAGTCGGTGCTTTTTTAAGTGCTGACCGCGGAGGAAGCGAAGGAGGCGGGAGCGTTTGGAGACGACGG
970	ACCACGTCTCACACCGGGCTGAGGAAGCTGAGGAGGGTTTTAGAGCTAGAAATAGCAAGTTAAAATAAGGCTAGTCCGTTATCAACTTGAAAAACTGGCACCGAGTCGGTGCTTTTTTAAGTGCTTACCGCTGAGGAAGCAGAGGCTGTGGCTACGTTTGGAGACGACGG
972	ACCACGTCTCACACCGGGCTGAGGAAGCTGAGGAGGGTTTTAGAGCTAGAAATAGCAAGTTAAAATAAGGCTAGTCCGTTATCAACTTGAAAAACTGGCACCGAGTCGGTGCTTTTTTAAGTGGCTACCGCTGTGGAAGCTGAGGACCCGGTTCAGTTTGGAGACGACGG
973	ACCACGTCTCACACCGGGCTGAGGAAGCTGAGGAGGGTTTTAGAGCTAGAAATAGCAAGTTAAAATAAGGCTAGTCCGTTATCAACTTGAAAAACTGGCACCGAGTCGGTGCTTTTTTAAGTTCCTACCGTTGAGTATGCTGAGGAGGAGGAGAAGTTTGGAGACGACGG
975	ACCACGTCTCACACCGGGCTGAGGAAGCTGAGGAGGGTTTTAGAGCTAGAAATAGCAAGTTAAAATAAGGCTAGTCCGTTATCAACTTGAAAAACTGGCACCGAGTCGGTGCTTTTTTAAGTTCGTACCTGTGAGGATGCTGAGGAGGAGGGGCCGTTTGGAGACGACGG
976	ACCACGTCTCACACCGGGCTGAGGAAGCTGAGGAGGGTTTTAGAGCTAGAAATAGCAAGTTAAAATAAGGCTAGTCCGTTATCAACTTGAAAAACTGGCACCGAGTCGGTGCTTTTTTAAGTTGACACGAAGGAGGGAGCTGAGGAGGGGGCATCGTTTGGAGACGACGG
977	ACCACGTCTCACACCGGGCTGAGGAAGCTGAGGAGGGTTTTAGAGCTAGAAATAGCAAGTTAAAATAAGGCTAGTCCGTTATCAACTTGAAAAACTGGCACCGAGTCGGTGCTTTTTTAAGTTGCCACGAATGAGGAAACTGAGGAAGAGGAGGAGTTTGGAGACGACGG
978	ACCACGTCTCACACCGGGCTGAGGAAGCTGAGGAGGGTTTTAGAGCTAGAAATAGCAAGTTAAAATAAGGCTAGTCCGTTATCAACTTGAAAAACTGGCACCGAGTCGGTGCTTTTTTAAGTTGGCACGAATGAGGAAGCTGAGGCTGGGGAAGAGTTTGGAGACGACGG
979	ACCACGTCTCACACCGGGCTGAGGAAGCTGAGGAGGGTTTTAGAGCTAGAAATAGCAAGTTAAAATAAGGCTAGTCCGTTATCAACTTGAAAAACTGGCACCGAGTCGGTGCTTTTTTAAGTTGGTACGAATGAGGAAGCTGGGAAGGAGGGAGTGTTTGGAGACGACGG
980	ACCACGTCTCACACCGGGCTGAGGAAGCTGAGGAGGGTTTTAGAGCTAGAAATAGCAAGTTAAAATAAGGCTAGTCCGTTATCAACTTGAAAAACTGGCACCGAGTCGGTGCTTTTTTAAGTTGTCACGACAGAGCCAGCTGAGGAGGGGGCATCGTTTGGAGACGACGG
982	ACCACGTCTCACACCGGGCTGAGGAAGCTGAGGAGGGTTTTAGAGCTAGAAATAGCAAGTTAAAATAAGGCTAGTCCGTTATCAACTTGAAAAACTGGCACCGAGTCGGTGCTTTTTTAATAACAGACGACCGAGGAGACTGAGGAGGCGGAACAGTTTGGAGACGACGG
983	ACCACGTCTCACACCGGGCTGAGGAAGCTGAGGAGGGTTTTAGAGCTAGAAATAGCAAGTTAAAATAAGGCTAGTCCGTTATCAACTTGAAAAACTGGCACCGAGTCGGTGCTTTTTTAATAACATACGACGGAGGAAGAGGAGGAGGAGGAAGAGTTTGGAGACGACGG
984	ACCACGTCTCACACCGGGCTGAGGAAGCTGAGGAGGGTTTTAGAGCTAGAAATAGCAAGTTAAAATAAGGCTAGTCCGTTATCAACTTGAAAAACTGGCACCGAGTCGGTGCTTTTTTAATAACCGACGACTAAGGAGGCTGAGGAAGTGGTAGGGTTTGGAGACGACGG
985	ACCACGTCTCACACCGGGCTGAGGAAGCTGAGGAGGGTTTTAGAGCTAGAAATAGCAAGTTAAAATAAGGCTAGTCCGTTATCAACTTGAAAAACTGGCACCGAGTCGGTGCTTTTTTAATAATATACGACTCAGGAGGCTGAGGTGGAGGCTGCGTTTGGAGACGACGG
986	ACCACGTCTCACACCGGGCTGAGGAAGCTGAGGAGGGTTTTAGAGCTAGAAATAGCAAGTTAAAATAAGGCTAGTCCGTTATCAACTTGAAAAACTGGCACCGAGTCGGTGCTTTTTTAATAATGTACGACTGAAAGAGCTGAGGAGGAGGAAGAGTTTGGAGACGACGG
987	ACCACGTCTCACACCGGGCTGAGGAAGCTGAGGAGGGTTTTAGAGCTAGAAATAGCAAGTTAAAATAAGGCTAGTCCGTTATCAACTTGAAAAACTGGCACCGAGTCGGTGCTTTTTTAATACAGCACGACTGAGGAAGATGAAGAGAAGGAGGGGTTTGGAGACGACGG
988	ACCACGTCTCACACCGGGCTGAGGAAGCTGAGGAGGGTTTTAGAGCTAGAAATAGCAAGTTAAAATAAGGCTAGTCCGTTATCAACTTGAAAAACTGGCACCGAGTCGGTGCTTTTTTAATACATAACGACTGAGGAATCCGAGGAAGAGGTAGCGTTTGGAGACGACGG
989	ACCACGTCTCACACCGGGCTGAGGAAGCTGAGGAGGGTTTTAGAGCTAGAAATAGCAAGTTAAAATAAGGCTAGTCCGTTATCAACTTGAAAAACTGGCACCGAGTCGGTGCTTTTTTAATACATCACGACTGAGGACGAAGAGGAGGAGGAGGAGTTTGGAGACGACGG
990	ACCACGTCTCACACCGGGCTGAGGAAGCTGAGGAGGGTTTTAGAGCTAGAAATAGCAAGTTAAAATAAGGCTAGTCCGTTATCAACTTGAAAAACTGGCACCGAGTCGGTGCTTTTTTAATACATGACGACTGAGGAGACAGAGGAGGAGGTGGGGTTTGGAGACGACGG
991	ACCACGTCTCACACCGGGCTGAGGAAGCTGAGGAGGGTTTTAGAGCTAGAAATAGCAAGTTAAAATAAGGCTAGTCCGTTATCAACTTGAAAAACTGGCACCGAGTCGGTGCTTTTTTAATACCAGACGACTGAGGAGACTGTGGAGGAGGACACGTTTGGAGACGACGG
992	ACCACGTCTCACACCGGGCTGAGGAAGCTGAGGAGGGTTTTAGAGCTAGAAATAGCAAGTTAAAATAAGGCTAGTCCGTTATCAACTTGAAAAACTGGCACCGAGTCGGTGCTTTTTTAATACGCTACGACTGAGGCAGGAGAGGAGGAGGTTGCGTTTGGAGACGACGG
993	ACCACGTCTCACACCGGGCTGAGGAAGCTGAGGAGGGTTTTAGAGCTAGAAATAGCAAGTTAAAATAAGGCTAGTCCGTTATCAACTTGAAAAACTGGCACCGAGTCGGTGCTTTTTTAATACGGAACGACTGATGAGGCTGTGGAGGTGGGAATGTTTGGAGACGACGG
994	ACCACGTCTCACACCGGGCTGAGGAAGCTGAGGAGGGTTTTAGAGCTAGAAATAGCAAGTTAAAATAAGGCTAGTCCGTTATCAACTTGAAAAACTGGCACCGAGTCGGTGCTTTTTTAATACGGCACGACTGATGATGGTGAGGAGGAGGAGGAGTTTGGAGACGACGG
995	ACCACGTCTCACACCGGGCTGAGGAAGCTGAGGAGGGTTTTAGAGCTAGAAATAGCAAGTTAAAATAAGGCTAGTCCGTTATCAACTTGAAAAACTGGCACCGAGTCGGTGCTTTTTTAATACGTCACGACTGGGGAAGGTGAGAAGGGGGAGGTGTTTGGAGACGACGG
996	ACCACGTCTCACACCGGGCTGAGGAAGCTGAGGAGGGTTTTAGAGCTAGAAATAGCAAGTTAAAATAAGGCTAGTCCGTTATCAACTTGAAAAACTGGCACCGAGTCGGTGCTTTTTTAATACGTGACGACTGGGGAGGCTGAGGCGGAGGATCCGTTTGGAGACGACGG
997	ACCACGTCTCACACCGGGCTGAGGAAGCTGAGGAGGGTTTTAGAGCTAGAAATAGCAAGTTAAAATAAGGCTAGTCCGTTATCAACTTGAAAAACTGGCACCGAGTCGGTGCTTTTTTAATACTACACGACTTGGGAAGCTGAGGCGGGGGGATTGTTTGGAGACGACGG
998	ACCACGTCTCACACCGGGCTGAGGAAGCTGAGGAGGGTTTTAGAGCTAGAAATAGCAAGTTAAAATAAGGCTAGTCCGTTATCAACTTGAAAAACTGGCACCGAGTCGGTGCTTTTTTAATACTCTACGCATGGGGAAGCTGAGGAAGGGGGTCTGTTTGGAGACGACGG
999	ACCACGTCTCACACCGGGCTGAGGAAGCTGAGGAGGGTTTTAGAGCTAGAAATAGCAAGTTAAAATAAGGCTAGTCCGTTATCAACTTGAAAAACTGGCACCGAGTCGGTGCTTTTTTAATACTGCACGCCAGAAGGAGCTGAGGAGGGGGCTGGGTTTGGAGACGACGG
1000	ACCACGTCTCACACCGGGCTGAGGAAGCTGAGGAGGGTTTTAGAGCTAGAAATAGCAAGTTAAAATAAGGCTAGTCCGTTATCAACTTGAAAAACTGGCACCGAGTCGGTGCTTTTTTAATAGAATACGCCCGAGAAAGGTGAGGAGGAGGTGCGGTTTGGAGACGACGG
1001	ACCACGTCTCACACCGGGCTGAGGAAGCTGAGGAGGGTTTTAGAGCTAGAAATAGCAAGTTAAAATAAGGCTAGTCCGTTATCAACTTGAAAAACTGGCACCGAGTCGGTGCTTTTTTAATAGACGACGCCTGAGCCAGCTGAGTAGGAGGCCTGGTTTGGAGACGACGG
1002	ACCACGTCTCACACCGGGCTGAGGAAGCTGAGGAGGGTTTTAGAGCTAGAAATAGCAAGTTAAAATAAGGCTAGTCCGTTATCAACTTGAAAAACTGGCACCGAGTCGGTGCTTTTTTAATAGACTACGCCTGAGGAAGAAGAGGAGGTGGTGGAGTTTGGAGACGACGG
1003	ACCACGTCTCACACCGGGCTGAGGAAGCTGAGGAGGGTTTTAGAGCTAGAAATAGCAAGTTAAAATAAGGCTAGTCCGTTATCAACTTGAAAAACTGGCACCGAGTCGGTGCTTTTTTAATAGATAACGCCTGAGGAAGAGGAGGAGGAGGAGGAGTTTGGAGACGACGG
1004	ACCACGTCTCACACCGGGCTGAGGAAGCTGAGGAGGGTTTTAGAGCTAGAAATAGCAAGTTAAAATAAGGCTAGTCCGTTATCAACTTGAAAAACTGGCACCGAGTCGGTGCTTTTTTAATAGATGACGCCTGAGGAAGGGGAAGAGGAGGAGGAGTTTGGAGACGACGG
1005	ACCACGTCTCACACCGGGCTGAGGAAGCTGAGGAGGGTTTTAGAGCTAGAAATAGCAAGTTAAAATAAGGCTAGTCCGTTATCAACTTGAAAAACTGGCACCGAGTCGGTGCTTTTTTAATAGCACACGCCTGAGGAAGTGGCGGAGGTGGGAAAGTTTGGAGACGACGG
1006	ACCACGTCTCACACCGGGCTGAGGAAGCTGAGGAGGGTTTTAGAGCTAGAAATAGCAAGTTAAAATAAGGCTAGTCCGTTATCAACTTGAAAAACTGGCACCGAGTCGGTGCTTTTTTAATAGGACACGCCTGAGGAGGAGGAGGAGGCGGGGGCGTTTGGAGACGACGG
1007	ACCACGTCTCACACCGGGCTGAGGAAGCTGAGGAGGGTTTTAGAGCTAGAAATAGCAAGTTAAAATAAGGCTAGTCCGTTATCAACTTGAAAAACTGGCACCGAGTCGGTGCTTTTTTAATAGGCAACGCCTGAGGATGCTGTGGTGGAGGAAGCGTTTGGAGACGACGG
1008	ACCACGTCTCACACCGGGCTGAGGAAGCTGAGGAGGGTTTTAGAGCTAGAAATAGCAAGTTAAAATAAGGCTAGTCCGTTATCAACTTGAAAAACTGGCACCGAGTCGGTGCTTTTTTAATAGGCCACGCCTGAGGATGGTGCGGAGGTGGACAGGTTTGGAGACGACGG
1010	ACCACGTCTCACACCGGGCTGAGGAAGCTGAGGAGGGTTTTAGAGCTAGAAATAGCAAGTTAAAATAAGGCTAGTCCGTTATCAACTTGAAAAACTGGCACCGAGTCGGTGCTTTTTTAATAGGTCACGCCTGCTGAAACTGAGGAGGTGGACCTGTTTGGAGACGACGG
1011	ACCACGTCTCACACCGGGCTGAGGAAGCTGAGGAGGGTTTTAGAGCTAGAAATAGCAAGTTAAAATAAGGCTAGTCCGTTATCAACTTGAAAAACTGGCACCGAGTCGGTGCTTTTTTAATAGTACACGCCTGCTGAAGCTGAGGGGGTGGGCTCGTTTGGAGACGACGG
1012	ACCACGTCTCACACCGGGCTGAGGAAGCTGAGGAGGGTTTTAGAGCTAGAAATAGCAAGTTAAAATAAGGCTAGTCCGTTATCAACTTGAAAAACTGGCACCGAGTCGGTGCTTTTTTAATAGTCAACGCCTGGGGAAGCTGTGGTGGTGGTGGGGTTTGGAGACGACGG
1013	ACCACGTCTCACACCGGGCTGAGGAAGCTGAGGAGGGTTTTAGAGCTAGAAATAGCAAGTTAAAATAAGGCTAGTCCGTTATCAACTTGAAAAACTGGCACCGAGTCGGTGCTTTTTTAATAGTCGACGCCTGGGGAGGCTGGGGAGGAGGTGAGGTTTGGAGACGACGG
1014	ACCACGTCTCACACCGGGCTGAGGAAGCTGAGGAGGGTTTTAGAGCTAGAAATAGCAAGTTAAAATAAGGCTAGTCCGTTATCAACTTGAAAAACTGGCACCGAGTCGGTGCTTTTTTAATAGTGCACGCCTGTGAAAGCAGAGGAGGAGGGAAAGTTTGGAGACGACGG
1015	ACCACGTCTCACACCGGGCTGAGGAAGCTGAGGAGGGTTTTAGAGCTAGAAATAGCAAGTTAAAATAAGGCTAGTCCGTTATCAACTTGAAAAACTGGCACCGAGTCGGTGCTTTTTTAATAGTGGACGCCTGTGGTAGGTGAGGAGGGGGCTGAGTTTGGAGACGACGG
1016	ACCACGTCTCACACCGGGCTGAGGAAGCTGAGGAGGGTTTTAGAGCTAGAAATAGCAAGTTAAAATAAGGCTAGTCCGTTATCAACTTGAAAAACTGGCACCGAGTCGGTGCTTTTTTAATAGTTGACGCCTTAGGAAGCTCAGAAGGTGGCTGAGTTTGGAGACGACGG
1017	ACCACGTCTCACACCGGGCTGAGGAAGCTGAGGAGGGTTTTAGAGCTAGAAATAGCAAGTTAAAATAAGGCTAGTCCGTTATCAACTTGAAAAACTGGCACCGAGTCGGTGCTTTTTTAATATAACACGCCTTAGGAAGCTGGGCAGGTGGAACCGTTTGGAGACGACGG
1018	ACCACGTCTCACACCGGGCTGAGGAAGCTGAGGAGGGTTTTAGAGCTAGAAATAGCAAGTTAAAATAAGGCTAGTCCGTTATCAACTTGAAAAACTGGCACCGAGTCGGTGCTTTTTTAATATAAGACGCTGGAGGAAGCAGAGGAGGAGGACCGGTTTGGAGACGACGG
1019	ACCACGTCTCACACCGGGCTGAGGAAGCTGAGGAGGGTTTTAGAGCTAGAAATAGCAAGTTAAAATAAGGCTAGTCCGTTATCAACTTGAAAAACTGGCACCGAGTCGGTGCTTTTTTAATATAATACGCTTGAGGAAGATGCGGAGGAGGGAGGGTTTGGAGACGACGG
1020	ACCACGTCTCACACCGGGCTGAGGAAGCTGAGGAGGGTTTTAGAGCTAGAAATAGCAAGTTAAAATAAGGCTAGTCCGTTATCAACTTGAAAAACTGGCACCGAGTCGGTGCTTTTTTAATATACAACGCTTGAGGTAGATGAGGAGGGGGGTCAGTTTGGAGACGACGG
1021	ACCACGTCTCACACCGGGCTGAGGAAGCTGAGGAGGGTTTTAGAGCTAGAAATAGCAAGTTAAAATAAGGCTAGTCCGTTATCAACTTGAAAAACTGGCACCGAGTCGGTGCTTTTTTAATATACTACGGAAGAAGGAGCTGAGGAGGTGGAAAGGTTTGGAGACGACGG
1022	ACCACGTCTCACACCGGGCTGAGGAAGCTGAGGAGGGTTTTAGAGCTAGAAATAGCAAGTTAAAATAAGGCTAGTCCGTTATCAACTTGAAAAACTGGCACCGAGTCGGTGCTTTTTTAATCACTAACGGAAGAGGAAGATGAGCAGGAGGCCAGGTTTGGAGACGACGG
1023	ACCACGTCTCACACCGGGCTGAGGAAGCTGAGGAGGGTTTTAGAGCTAGAAATAGCAAGTTAAAATAAGGCTAGTCCGTTATCAACTTGAAAAACTGGCACCGAGTCGGTGCTTTTTTAATCACTTACGGAAGAGGAAGGGGAGGAGGGGGAGGAGTTTGGAGACGACGG
1024	ACCACGTCTCACACCGGGCTGAGGAAGCTGAGGAGGGTTTTAGAGCTAGAAATAGCAAGTTAAAATAAGGCTAGTCCGTTATCAACTTGAAAAACTGGCACCGAGTCGGTGCTTTTTTAATCAGATACGGAAGAGGACGCCGAGGAGGAGGGGGCGTTTGGAGACGACGG
1025	ACCACGTCTCACACCGGGCTGAGGAAGCTGAGGAGGGTTTTAGAGCTAGAAATAGCAAGTTAAAATAAGGCTAGTCCGTTATCAACTTGAAAAACTGGCACCGAGTCGGTGCTTTTTTAATCAGGCACGGAAGGGGAAGGTGAGGAGGAGGAATTGTTTGGAGACGACGG
1026	ACCACGTCTCACACCGGGCTGAGGAAGCTGAGGAGGGTTTTAGAGCTAGAAATAGCAAGTTAAAATAAGGCTAGTCCGTTATCAACTTGAAAAACTGGCACCGAGTCGGTGCTTTTTTAATCAGTAACGGACGAAGGAGCTGAGGAGGGGGGCGAGTTTGGAGACGACGG
1027	ACCACGTCTCACACCGGGCTGAGGAAGCTGAGGAGGGTTTTAGAGCTAGAAATAGCAAGTTAAAATAAGGCTAGTCCGTTATCAACTTGAAAAACTGGCACCGAGTCGGTGCTTTTTTAATCAGTTACGGACGAGGAAGCTCTGGAGGCGGTGAGGTTTGGAGACGACGG
1028	ACCACGTCTCACACCGGGCTGAGGAAGCTGAGGAGGGTTTTAGAGCTAGAAATAGCAAGTTAAAATAAGGCTAGTCCGTTATCAACTTGAAAAACTGGCACCGAGTCGGTGCTTTTTTAATCATCTACGGAGAAGGAAGATGAGGAGGTGGCGGTGTTTGGAGACGACGG
1030	ACCACGTCTCACACCGGGCTGAGGAAGCTGAGGAGGGTTTTAGAGCTAGAAATAGCAAGTTAAAATAAGGCTAGTCCGTTATCAACTTGAAAAACTGGCACCGAGTCGGTGCTTTTTTAATCCAAGACGGAGGAGGAAACGGAGGAGGGGGCTGGGTTTGGAGACGACGG
1031	ACCACGTCTCACACCGGGCTGAGGAAGCTGAGGAGGGTTTTAGAGCTAGAAATAGCAAGTTAAAATAAGGCTAGTCCGTTATCAACTTGAAAAACTGGCACCGAGTCGGTGCTTTTTTAATCCACCACGGAGGAGGAAAGTGAGGAGGGGGAGGAGTTTGGAGACGACGG
1032	ACCACGTCTCACACCGGGCTGAGGAAGCTGAGGAGGGTTTTAGAGCTAGAAATAGCAAGTTAAAATAAGGCTAGTCCGTTATCAACTTGAAAAACTGGCACCGAGTCGGTGCTTTTTTAATCGCGAACGGAGGAGGAAGAAGAGGAGGCGGAGGTGTTTGGAGACGACGG
1033	ACCACGTCTCACACCGGGCTGAGGAAGCTGAGGAGGGTTTTAGAGCTAGAAATAGCAAGTTAAAATAAGGCTAGTCCGTTATCAACTTGAAAAACTGGCACCGAGTCGGTGCTTTTTTAATCGCGGACGGAGGAGGAAGAAGAGGAGGGGGGAATGTTTGGAGACGACGG
1034	ACCACGTCTCACACCGGTCGATGATCTCTTTAACCGGTTTTAGAGCTAGAAATAGCAAGTTAAAATAAGGCTAGTCCGTTATCAACTTGAAAAACTGGCACCGAGTCGGTGCTTTTTTAATGGTGCACGTCAATCATGTCTTTAACTGTGGCTGCGTTTGGAGACGACGG
1036	ACCACGTCTCACACCGGTCGATGATCTCTTTAACCGGTTTTAGAGCTAGAAATAGCAAGTTAAAATAAGGCTAGTCCGTTATCAACTTGAAAAACTGGCACCGAGTCGGTGCTTTTTTAATGGTGTACGTCAATGATCTCTTTAACTTGGGATGCGTTTGGAGACGACGG
1038	ACCACGTCTCACACCGGTCGATGATCTCTTTAACCGGTTTTAGAGCTAGAAATAGCAAGTTAAAATAAGGCTAGTCCGTTATCAACTTGAAAAACTGGCACCGAGTCGGTGCTTTTTTAATGTAACACGTCAATTATATCTTTAACCATGGCTATGTTTGGAGACGACGG
1040	ACCACGTCTCACACCGGTCGATGATCTCTTTAACCGGTTTTAGAGCTAGAAATAGCAAGTTAAAATAAGGCTAGTCCGTTATCAACTTGAAAAACTGGCACCGAGTCGGTGCTTTTTTAATGTGTCACGTCAATGATCTCTATCACCCAGGCTGGGTTTGGAGACGACGG
1043	ACCACGTCTCACACCGGTCGATGATCTCTTTAACCGGTTTTAGAGCTAGAAATAGCAAGTTAAAATAAGGCTAGTCCGTTATCAACTTGAAAAACTGGCACCGAGTCGGTGCTTTTTTAATGGTCCACCACGATGATCTTGTTAACCGTGGCAGCGTTTGGAGACGACGG
1044	ACCACGTCTCACACCGGTCGATGATCTCTTTAACCGGTTTTAGAGCTAGAAATAGCAAGTTAAAATAAGGCTAGTCCGTTATCAACTTGAAAAACTGGCACCGAGTCGGTGCTTTTTTAATGGTCGACGGCGATGATCTCTTATACGGAGGCATGGTTTGGAGACGACGG
1045	ACCACGTCTCACACCGGTCGATGATCTCTTTAACCGGTTTTAGAGCTAGAAATAGCAAGTTAAAATAAGGCTAGTCCGTTATCAACTTGAAAAACTGGCACCGAGTCGGTGCTTTTTTAATGTAATACGTCGATCGTGTCTTTAACTGTGGCTACGTTTGGAGACGACGG
1046	ACCACGTCTCACACCGGTCGATGATCTCTTTAACCGGTTTTAGAGCTAGAAATAGCAAGTTAAAATAAGGCTAGTCCGTTATCAACTTGAAAAACTGGCACCGAGTCGGTGCTTTTTTAATGTACCACGTCGATGAGCTGTTTGACAGGGGAGAGGTTTGGAGACGACGG
1047	ACCACGTCTCACACCGGTCGATGATCTCTTTAACCGGTTTTAGAGCTAGAAATAGCAAGTTAAAATAAGGCTAGTCCGTTATCAACTTGAAAAACTGGCACCGAGTCGGTGCTTTTTTAATGTACGACGTCTATGATCTCTCCATCCGGGGCTTTGTTTGGAGACGACGG
1048	ACCACGTCTCACACCGGTCGATGATCTCTTTAACCGGTTTTAGAGCTAGAAATAGCAAGTTAAAATAAGGCTAGTCCGTTATCAACTTGAAAAACTGGCACCGAGTCGGTGCTTTTTTAATGTCCGACGTGGGTGATCTCTTGAACCCAGGAGTTGTTTGGAGACGACGG
1049	ACCACGTCTCACACCGGTCGATGATCTCTTTAACCGGTTTTAGAGCTAGAAATAGCAAGTTAAAATAAGGCTAGTCCGTTATCAACTTGAAAAACTGGCACCGAGTCGGTGCTTTTTTAATGTCCTACGTTGATCATCTCTTAAACCAGGGCTGCGTTTGGAGACGACGG
1050	ACCACGTCTCACACCGGTCGATGATCTCTTTAACCGGTTTTAGAGCTAGAAATAGCAAGTTAAAATAAGGCTAGTCCGTTATCAACTTGAAAAACTGGCACCGAGTCGGTGCTTTTTTAATGTCGAACGTTGATGATCTCTTTAATCCGGGGCACGTTTGGAGACGACGG
1051	ACCACGTCTCACACCGGTCGATGATCTCTTTAACCGGTTTTAGAGCTAGAAATAGCAAGTTAAAATAAGGCTAGTCCGTTATCAACTTGAAAAACTGGCACCGAGTCGGTGCTTTTTTAATGTCGCACGTTGATGTTCTGTTTAACCCAGGATTAGTTTGGAGACGACGG
1052	ACCACGTCTCACACCGGTCGATGATCTCTTTAACCGGTTTTAGAGCTAGAAATAGCAAGTTAAAATAAGGCTAGTCCGTTATCAACTTGAAAAACTGGCACCGAGTCGGTGCTTTTTTAATGTCGTACTTGGATGAACTCTTTAACTGAGGAGGTGTTTGGAGACGACGG
1053	ACCACGTCTCACACCGGTCGATGATCTCTTTAACCGGTTTTAGAGCTAGAAATAGCAAGTTAAAATAAGGCTAGTCCGTTATCAACTTGAAAAACTGGCACCGAGTCGGTGCTTTTTTAATGTCTAACTTTGGTGATCTCTTTAACAGTGGTGTAGTTTGGAGACGACGG
1054	ACCACGTCTCACACCGGTCGATGATCTCTTTAACCGGTTTTAGAGCTAGAAATAGCAAGTTAAAATAAGGCTAGTCCGTTATCAACTTGAAAAACTGGCACCGAGTCGGTGCTTTTTTAATGTCTGACGAGGATGATCTCTTGAACCCAGGAATTGTTTGGAGACGACGG
1055	ACCACGTCTCACACCGGTCGATGATCTCTTTAACCGGTTTTAGAGCTAGAAATAGCAAGTTAAAATAAGGCTAGTCCGTTATCAACTTGAAAAACTGGCACCGAGTCGGTGCTTTTTTAATGTTAGACGTCAATGGTGTCTTTAACCATGGCTGTGTTTGGAGACGACGG
1056	ACCACGTCTCACACCGGTCGATGATCTCTTTAACCGGTTTTAGAGCTAGAAATAGCAAGTTAAAATAAGGCTAGTCCGTTATCAACTTGAAAAACTGGCACCGAGTCGGTGCTTTTTTAATGTTCGACGTCGATTATCTCTGTAAACAGGGCAGAGTTTGGAGACGACGG
1057	ACCACGTCTCACACCGGTCGATGATCTCTTTAACCGGTTTTAGAGCTAGAAATAGCAAGTTAAAATAAGGCTAGTCCGTTATCAACTTGAAAAACTGGCACCGAGTCGGTGCTTTTTTAATGTTCTACGTCTATTGTGTCTTTAACCGTGGCTAGGTTTGGAGACGACGG
1058	ACCACGTCTCACACCGGTCGATGATCTCTTTAACCGGTTTTAGAGCTAGAAATAGCAAGTTAAAATAAGGCTAGTCCGTTATCAACTTGAAAAACTGGCACCGAGTCGGTGCTTTTTTAATGTTGAACGTGAATGGTCTCTTTAACCCTGGTACTGTTTGGAGACGACGG
1059	ACCACGTCTCACACCGGTCGATGATCTCTTTAACCGGTTTTAGAGCTAGAAATAGCAAGTTAAAATAAGGCTAGTCCGTTATCAACTTGAAAAACTGGCACCGAGTCGGTGCTTTTTTAATGTTGTACGTTGAGGATCTCTTTCACCCAGGAGATGTTTGGAGACGACGG
1060	ACCACGTCTCACACCGGTCGATGATCTCTTTAACCGGTTTTAGAGCTAGAAATAGCAAGTTAAAATAAGGCTAGTCCGTTATCAACTTGAAAAACTGGCACCGAGTCGGTGCTTTTTTAATTAACAACGTTGATGATCTCTTTGATCGGGGAAAAGTTTGGAGACGACGG
1061	ACCACGTCTCACACCGGCCTCCGGGGACTGCCGTGCGTTTTAGAGCTAGAAATAGCAAGTTAAAATAAGGCTAGTCCGTTATCAACTTGAAAAACTGGCACCGAGTCGGTGCTTTTTTCTTGCACCACGCCCTCGGGGACTGACCTGCAGGGTGCGTTTGGAGACGACGG
1062	ACCACGTCTCACACCGGCCTCCGGGGACTGCCGTGCGTTTTAGAGCTAGAAATAGCAAGTTAAAATAAGGCTAGTCCGTTATCAACTTGAAAAACTGGCACCGAGTCGGTGCTTTTTTCTTGCTATACGCCTGCAGGGGCTGCCGTGGGGGCTGGGTTTGGAGACGACGG
1064	ACCACGTCTCACACCGGCCTCCGGGGACTGCCGTGCGTTTTAGAGCTAGAAATAGCAAGTTAAAATAAGGCTAGTCCGTTATCAACTTGAAAAACTGGCACCGAGTCGGTGCTTTTTTCTTGGACAACGGCTCCGGGGCTGGCCGTGCGGGAGCCGTTTGGAGACGACGG
1069	ACCACGTCTCACACCGGCCTCCGGGGACTGCCGTGCGTTTTAGAGCTAGAAATAGCAAGTTAAAATAAGGCTAGTCCGTTATCAACTTGAAAAACTGGCACCGAGTCGGTGCTTTTTTCTTGAGCTACACCTCCGGGCACTGACGGGCCGGTGCCGTTTGGAGACGACGG
1070	ACCACGTCTCACACCGGCCTCCGGGGACTGCCGTGCGTTTTAGAGCTAGAAATAGCAAGTTAAAATAAGGCTAGTCCGTTATCAACTTGAAAAACTGGCACCGAGTCGGTGCTTTTTTCTTGAGGAACCCCTCCGGGGGCTGGGGTGCAGGCACTGTTTGGAGACGACGG
1071	ACCACGTCTCACACCGGCCTCCGGGGACTGCCGTGCGTTTTAGAGCTAGAAATAGCAAGTTAAAATAAGGCTAGTCCGTTATCAACTTGAAAAACTGGCACCGAGTCGGTGCTTTTTTCTTGAGGTACCCCTCCTGGGAATGCCATGCGGGTACCGTTTGGAGACGACGG
1072	ACCACGTCTCACACCGGCCTCCGGGGACTGCCGTGCGTTTTAGAGCTAGAAATAGCAAGTTAAAATAAGGCTAGTCCGTTATCAACTTGAAAAACTGGCACCGAGTCGGTGCTTTTTTCTTGAGTAACCCCTGCGGGGAGTGCCGTGGAGGGGAGGTTTGGAGACGACGG
1073	ACCACGTCTCACACCGGCCTCCGGGGACTGCCGTGCGTTTTAGAGCTAGAAATAGCAAGTTAAAATAAGGCTAGTCCGTTATCAACTTGAAAAACTGGCACCGAGTCGGTGCTTTTTTCTTGAGTGACGACTCCGGGCACCGCCGTGGTGGAGCAGTTTGGAGACGACGG
1074	ACCACGTCTCACACCGGCCTCCGGGGACTGCCGTGCGTTTTAGAGCTAGAAATAGCAAGTTAAAATAAGGCTAGTCCGTTATCAACTTGAAAAACTGGCACCGAGTCGGTGCTTTTTTCTTGATACACGCACCCTGGGACTGCCTTGCGGGGCTCGTTTGGAGACGACGG
1075	ACCACGTCTCACACCGGCCTCCGGGGACTGCCGTGCGTTTTAGAGCTAGAAATAGCAAGTTAAAATAAGGCTAGTCCGTTATCAACTTGAAAAACTGGCACCGAGTCGGTGCTTTTTTCTTGATATACGCATCCGGGGACAGCTGAGCTGGCATCGTTTGGAGACGACGG
1076	ACCACGTCTCACACCGGCCTCCGGGGACTGCCGTGCGTTTTAGAGCTAGAAATAGCAAGTTAAAATAAGGCTAGTCCGTTATCAACTTGAAAAACTGGCACCGAGTCGGTGCTTTTTTCTTGATCGACGCATCTGGGGACTGCAGTACGGGCAGTGTTTGGAGACGACGG
1077	ACCACGTCTCACACCGGCCTCCGGGGACTGCCGTGCGTTTTAGAGCTAGAAATAGCAAGTTAAAATAAGGCTAGTCCGTTATCAACTTGAAAAACTGGCACCGAGTCGGTGCTTTTTTCTTGATGAACGCCACCAGGGACTGTGGTGCAGGCCATGTTTGGAGACGACGG
1078	ACCACGTCTCACACCGGCCTCCGGGGACTGCCGTGCGTTTTAGAGCTAGAAATAGCAAGTTAAAATAAGGCTAGTCCGTTATCAACTTGAAAAACTGGCACCGAGTCGGTGCTTTTTTCTTGATGTACGCCACTGTGGACTGCGGTGCAGGCACAGTTTGGAGACGACGG
1079	ACCACGTCTCACACCGGCCTCCGGGGACTGCCGTGCGTTTTAGAGCTAGAAATAGCAAGTTAAAATAAGGCTAGTCCGTTATCAACTTGAAAAACTGGCACCGAGTCGGTGCTTTTTTCTTGATTCACGCCCCAGGGGCCTGCCCTGCAGGTCACGTTTGGAGACGACGG
1080	ACCACGTCTCACACCGGCCTCCGGGGACTGCCGTGCGTTTTAGAGCTAGAAATAGCAAGTTAAAATAAGGCTAGTCCGTTATCAACTTGAAAAACTGGCACCGAGTCGGTGCTTTTTTCTTGCAATACGCCCCCGGGGACTGGCGCCCTGGCCCGGTTTGGAGACGACGG
1081	ACCACGTCTCACACCGGCCTCCGGGGACTGCCGTGCGTTTTAGAGCTAGAAATAGCAAGTTAAAATAAGGCTAGTCCGTTATCAACTTGAAAAACTGGCACCGAGTCGGTGCTTTTTTCTTGCACAACGCCCCCGGGGGCGGCCGGGCCGGGCCCGTTTGGAGACGACGG
1082	ACCACGTCTCACACCGGCCTCCGGGGACTGCCGTGCGTTTTAGAGCTAGAAATAGCAAGTTAAAATAAGGCTAGTCCGTTATCAACTTGAAAAACTGGCACCGAGTCGGTGCTTTTTTCTTGCACGACGCCGCCAGGGGCTGCAGTGCAGGGAAAGTTTGGAGACGACGG
1083	ACCACGTCTCACACCGGCCTCCGGGGACTGCCGTGCGTTTTAGAGCTAGAAATAGCAAGTTAAAATAAGGCTAGTCCGTTATCAACTTGAAAAACTGGCACCGAGTCGGTGCTTTTTTCTTGCAGAACGCCGCCGGGCTCTGCCGTGGGGGTCGGGTTTGGAGACGACGG
1084	ACCACGTCTCACACCGGCCTCCGGGGACTGCCGTGCGTTTTAGAGCTAGAAATAGCAAGTTAAAATAAGGCTAGTCCGTTATCAACTTGAAAAACTGGCACCGAGTCGGTGCTTTTTTCTTGCAGCACGCCGCCGGGGACCGCGGAGCCGGGACGGTTTGGAGACGACGG
1085	ACCACGTCTCACACCGGCCTCCGGGGACTGCCGTGCGTTTTAGAGCTAGAAATAGCAAGTTAAAATAAGGCTAGTCCGTTATCAACTTGAAAAACTGGCACCGAGTCGGTGCTTTTTTCTTGCAGGACGCCGCGGGGGACTGGGGTGCGGGGAATGTTTGGAGACGACGG
1086	ACCACGTCTCACACCGGCCTCCGGGGACTGCCGTGCGTTTTAGAGCTAGAAATAGCAAGTTAAAATAAGGCTAGTCCGTTATCAACTTGAAAAACTGGCACCGAGTCGGTGCTTTTTTCTTGCAGTACGCCTACTGGGACTGCAGTGCTGGGGCCGTTTGGAGACGACGG
1087	ACCACGTCTCACACCGGCCTCCGGGGACTGCCGTGCGTTTTAGAGCTAGAAATAGCAAGTTAAAATAAGGCTAGTCCGTTATCAACTTGAAAAACTGGCACCGAGTCGGTGCTTTTTTCTTGCATCACGCCTCACGGGACTGCCTTGTTGGTTTTGTTTGGAGACGACGG
1088	ACCACGTCTCACACCGGCCTCCGGGGACTGCCGTGCGTTTTAGAGCTAGAAATAGCAAGTTAAAATAAGGCTAGTCCGTTATCAACTTGAAAAACTGGCACCGAGTCGGTGCTTTTTTCTTGCATGACGCCTCAGAGGACTGCCATGAGGGTCCAGTTTGGAGACGACGG
1089	ACCACGTCTCACACCGGCCTCCGGGGACTGCCGTGCGTTTTAGAGCTAGAAATAGCAAGTTAAAATAAGGCTAGTCCGTTATCAACTTGAAAAACTGGCACCGAGTCGGTGCTTTTTTCTTGCATTACGCCTCCAGAGGCTGCTGTGCAGGTGGAGTTTGGAGACGACGG
1090	ACCACGTCTCACACCGGCCTCCGGGGACTGCCGTGCGTTTTAGAGCTAGAAATAGCAAGTTAAAATAAGGCTAGTCCGTTATCAACTTGAAAAACTGGCACCGAGTCGGTGCTTTTTTCTTGCCATACGCCTCCAGGGCCAGCTGTGCGGGGGAGGTTTGGAGACGACGG
1091	ACCACGTCTCACACCGGCCTCCGGGGACTGCCGTGCGTTTTAGAGCTAGAAATAGCAAGTTAAAATAAGGCTAGTCCGTTATCAACTTGAAAAACTGGCACCGAGTCGGTGCTTTTTTCTTGCCGAACGCCTCCATGGACAGCCATGCAGGTTGCGTTTGGAGACGACGG
1092	ACCACGTCTCACACCGGCCTCCGGGGACTGCCGTGCGTTTTAGAGCTAGAAATAGCAAGTTAAAATAAGGCTAGTCCGTTATCAACTTGAAAAACTGGCACCGAGTCGGTGCTTTTTTCTTGCCTCACGCCTCCCGGGACCGCGGAGCTGGAGTCGTTTGGAGACGACGG
1093	ACCACGTCTCACACCGGCCTCCGGGGACTGCCGTGCGTTTTAGAGCTAGAAATAGCAAGTTAAAATAAGGCTAGTCCGTTATCAACTTGAAAAACTGGCACCGAGTCGGTGCTTTTTTCTTGCCTGACGCCTCCCGGTTCTGCCGCGCGGGCCCTGTTTGGAGACGACGG
1094	ACCACGTCTCACACCGGCCTCCGGGGACTGCCGTGCGTTTTAGAGCTAGAAATAGCAAGTTAAAATAAGGCTAGTCCGTTATCAACTTGAAAAACTGGCACCGAGTCGGTGCTTTTTTCTTGCCTTACGCCTCCGCGGATTGGCGCGCAGGCGGGGTTTGGAGACGACGG
1095	ACCACGTCTCACACCGGCCTCCGGGGACTGCCGTGCGTTTTAGAGCTAGAAATAGCAAGTTAAAATAAGGCTAGTCCGTTATCAACTTGAAAAACTGGCACCGAGTCGGTGCTTTTTTCTTGCGCGACGCCTCCGGGGCCGGCGGTGCCGGGGTCGTTTGGAGACGACGG
1096	ACCACGTCTCACACCGGCCTCCGGGGACTGCCGTGCGTTTTAGAGCTAGAAATAGCAAGTTAAAATAAGGCTAGTCCGTTATCAACTTGAAAAACTGGCACCGAGTCGGTGCTTTTTTCTTGCGGAACGCCTCCGGGGTCCGCCGTGAGGGTGTTGTTTGGAGACGACGG
1097	ACCACGTCTCACACCGGCCTCCGGGGACTGCCGTGCGTTTTAGAGCTAGAAATAGCAAGTTAAAATAAGGCTAGTCCGTTATCAACTTGAAAAACTGGCACCGAGTCGGTGCTTTTTTCTTGCGGCACGCCTCCGGGGTGCTCCGTGCCGGATCTGTTTGGAGACGACGG
1098	ACCACGTCTCACACCGGCCTCCGGGGACTGCCGTGCGTTTTAGAGCTAGAAATAGCAAGTTAAAATAAGGCTAGTCCGTTATCAACTTGAAAAACTGGCACCGAGTCGGTGCTTTTTTCTTGCGTCACGCCTCGGGGGCCTGCTGTGGTGGGGTCGTTTGGAGACGACGG
1099	ACCACGTCTCACACCGGCCTCCGGGGACTGCCGTGCGTTTTAGAGCTAGAAATAGCAAGTTAAAATAAGGCTAGTCCGTTATCAACTTGAAAAACTGGCACCGAGTCGGTGCTTTTTTCTTGCGTGACGCCTCTGAGGACAGCAGTGCCGGGATAGTTTGGAGACGACGG
1100	ACCACGTCTCACACCGGCCTCCGGGGACTGCCGTGCGTTTTAGAGCTAGAAATAGCAAGTTAAAATAAGGCTAGTCCGTTATCAACTTGAAAAACTGGCACCGAGTCGGTGCTTTTTTCTTGCGTTACGCCTCTGGGCACGGCCCTGCCGGTCACGTTTGGAGACGACGG
1101	ACCACGTCTCACACCGGCCTCCGGGGACTGCCGTGCGTTTTAGAGCTAGAAATAGCAAGTTAAAATAAGGCTAGTCCGTTATCAACTTGAAAAACTGGCACCGAGTCGGTGCTTTTTTCTTGCTACACGCCTGAGGGGTCTCCCGTGCAGGTGGCGTTTGGAGACGACGG
1102	ACCACGTCTCACACCGGCCTCCGGGGACTGCCGTGCGTTTTAGAGCTAGAAATAGCAAGTTAAAATAAGGCTAGTCCGTTATCAACTTGAAAAACTGGCACCGAGTCGGTGCTTTTTTCTTGCTCCACGCCTGCGGGCCCTGTCGTGCAGGATTGGTTTGGAGACGACGG
1103	ACCACGTCTCACACCGGCCTCCGGGGACTGCCGTGCGTTTTAGAGCTAGAAATAGCAAGTTAAAATAAGGCTAGTCCGTTATCAACTTGAAAAACTGGCACCGAGTCGGTGCTTTTTTCTTGCTCGACGCCTGCGGGGACTTACCTGCTGGGCCCGTTTGGAGACGACGG
1104	ACCACGTCTCACACCGGCCTCCGGGGACTGCCGTGCGTTTTAGAGCTAGAAATAGCAAGTTAAAATAAGGCTAGTCCGTTATCAACTTGAAAAACTGGCACCGAGTCGGTGCTTTTTTCTTGCTGCACGCGTCCGGGATCGGCCGTGCCGGGGGTGTTTGGAGACGACGG
1105	ACCACGTCTCACACCGGCCTCCGGGGACTGCCGTGCGTTTTAGAGCTAGAAATAGCAAGTTAAAATAAGGCTAGTCCGTTATCAACTTGAAAAACTGGCACCGAGTCGGTGCTTTTTTCTTGCTGGACGCGTCTGGGGTCTGCTGTGCGGGGAGCGTTTGGAGACGACGG
1106	ACCACGTCTCACACCGGCCTCCGGGGACTGCCGTGCGTTTTAGAGCTAGAAATAGCAAGTTAAAATAAGGCTAGTCCGTTATCAACTTGAAAAACTGGCACCGAGTCGGTGCTTTTTTCTTGCTTAACGCTTCACGGGACTGCCGTGGGGGCTGCGTTTGGAGACGACGG
1107	ACCACGTCTCACACCGGCCTCCGGGGACTGCCGTGCGTTTTAGAGCTAGAAATAGCAAGTTAAAATAAGGCTAGTCCGTTATCAACTTGAAAAACTGGCACCGAGTCGGTGCTTTTTTCTTGGACCACGGCTCCTGGGACTGTCGGGCAGGGGCGGTTTGGAGACGACGG
1108	ACCACGTCTCACACCGGCCTCCGGGGACTGCCGTGCGTTTTAGAGCTAGAAATAGCAAGTTAAAATAAGGCTAGTCCGTTATCAACTTGAAAAACTGGCACCGAGTCGGTGCTTTTTTCTTGGACTACGGGTCCGTGGGCTGCCGTGCTGGCCGGGTTTGGAGACGACGG
1109	ACCACGTCTCACACCGGCCTCCGGGGACTGCCGTGCGTTTTAGAGCTAGAAATAGCAAGTTAAAATAAGGCTAGTCCGTTATCAACTTGAAAAACTGGCACCGAGTCGGTGCTTTTTTCTTGGATGACTCCCCCGGGGACTCCCGCGCCGGGACGGTTTGGAGACGACGG
1110	ACCACGTCTCACACCGGCCTCCGGGGACTGCCGTGCGTTTTAGAGCTAGAAATAGCAAGTTAAAATAAGGCTAGTCCGTTATCAACTTGAAAAACTGGCACCGAGTCGGTGCTTTTTTCTTGGATTACTCCTCCAGTGACTGCCTTGCTGGACACGTTTGGAGACGACGG
1111	ACCACGTCTCACACCGGCCTCCGGGGACTGCCGTGCGTTTTAGAGCTAGAAATAGCAAGTTAAAATAAGGCTAGTCCGTTATCAACTTGAAAAACTGGCACCGAGTCGGTGCTTTTTTCTTGGCAGACTCCTCCGGGGTCAGCCTTGCTGGAGCCGTTTGGAGACGACGG
1112	ACCACGTCTCACACCGGCCTCCGGGGACTGCCGTGCGTTTTAGAGCTAGAAATAGCAAGTTAAAATAAGGCTAGTCCGTTATCAACTTGAAAAACTGGCACCGAGTCGGTGCTTTTTTCTTGGCTGACAGCTCCGGGGACTGTCGTGCTGGGCTGGTTTGGAGACGACGG
1113	ACCACGTCTCACACCGGCCTCCGGGGACTGCCGTGCGTTTTAGAGCTAGAAATAGCAAGTTAAAATAAGGCTAGTCCGTTATCAACTTGAAAAACTGGCACCGAGTCGGTGCTTTTTTCTTGGCTTACCCCTCCGGGGGCTGCCGTCCTGGCTGTGTTTGGAGACGACGG
1114	ACCACGTCTCACACCGGCCTCCGGGGACTGCCGTGCGTTTTAGAGCTAGAAATAGCAAGTTAAAATAAGGCTAGTCCGTTATCAACTTGAAAAACTGGCACCGAGTCGGTGCTTTTTTCTTGGTCAACGCATCCGGGCACCGCCGGGCCGGGAGGGTTTGGAGACGACGG
1115	ACCACGTCTCACACCGGCCTCCGGGGACTGCCGTGCGTTTTAGAGCTAGAAATAGCAAGTTAAAATAAGGCTAGTCCGTTATCAACTTGAAAAACTGGCACCGAGTCGGTGCTTTTTTCTTGGTCCACGCATCCGGGGAGGGCAGTGCAGGGTTTGTTTGGAGACGACGG
1116	ACCACGTCTCACACCGGCCTCCGGGGACTGCCGTGCGTTTTAGAGCTAGAAATAGCAAGTTAAAATAAGGCTAGTCCGTTATCAACTTGAAAAACTGGCACCGAGTCGGTGCTTTTTTCTTGGTGTACGCATCCTGGGAACGCCGTGCAGGCTGAGTTTGGAGACGACGG
1117	ACCACGTCTCACACCGGCCTCCGGGGACTGCCGTGCGTTTTAGAGCTAGAAATAGCAAGTTAAAATAAGGCTAGTCCGTTATCAACTTGAAAAACTGGCACCGAGTCGGTGCTTTTTTCTTGGTTAACGCATCTGGGGACTCCTGTGCAGGGTTGGTTTGGAGACGACGG
1118	ACCACGTCTCACACCGGCCTCCGGGGACTGCCGTGCGTTTTAGAGCTAGAAATAGCAAGTTAAAATAAGGCTAGTCCGTTATCAACTTGAAAAACTGGCACCGAGTCGGTGCTTTTTTCTTGGTTCACGCCACCGGGGACAGGCGTGGTGGCTCAGTTTGGAGACGACGG
1119	ACCACGTCTCACACCGGCCTCCGGGGACTGCCGTGCGTTTTAGAGCTAGAAATAGCAAGTTAAAATAAGGCTAGTCCGTTATCAACTTGAAAAACTGGCACCGAGTCGGTGCTTTTTTCTTGGTTGACGCCACTGGGGGCTGCCGCGCCGGAGAGGTTTGGAGACGACGG
1121	ACCACGTCTCACACCGGCCTCCGGGGACTGCCGTGCGTTTTAGAGCTAGAAATAGCAAGTTAAAATAAGGCTAGTCCGTTATCAACTTGAAAAACTGGCACCGAGTCGGTGCTTTTTTCTTGTATCACGCCTCAGGAGACTGGAGTGCAGGTGCCGTTTGGAGACGACGG
1122	ACCACGTCTCACACCGGCCTCCGGGGACTGCCGTGCGTTTTAGAGCTAGAAATAGCAAGTTAAAATAAGGCTAGTCCGTTATCAACTTGAAAAACTGGCACCGAGTCGGTGCTTTTTTCTTGTATGACGCCTCCAGAGTCTGCCCTGCAGGAGTTGTTTGGAGACGACGG
1123	ACCACGTCTCACACCGGCCTCCGGGGACTGCCGTGCGTTTTAGAGCTAGAAATAGCAAGTTAAAATAAGGCTAGTCCGTTATCAACTTGAAAAACTGGCACCGAGTCGGTGCTTTTTTCTTGTATTACGCCTCCAGGGACAGCTGTGCAGGTAATGTTTGGAGACGACGG
1124	ACCACGTCTCACACCGGCCTCCGGGGACTGCCGTGCGTTTTAGAGCTAGAAATAGCAAGTTAAAATAAGGCTAGTCCGTTATCAACTTGAAAAACTGGCACCGAGTCGGTGCTTTTTTCTTGTCCAACGCCTCCCCGGCCTGCCTTGCTGGGTTGGTTTGGAGACGACGG
1125	ACCACGTCTCACACCGGCCTCCGGGGACTGCCGTGCGTTTTAGAGCTAGAAATAGCAAGTTAAAATAAGGCTAGTCCGTTATCAACTTGAAAAACTGGCACCGAGTCGGTGCTTTTTTCTTGTCGTACGCCTCCGGCGTCTGCGGGGCCGGGCGGGTTTGGAGACGACGG
1126	ACCACGTCTCACACCGGCCTCCGGGGACTGCCGTGCGTTTTAGAGCTAGAAATAGCAAGTTAAAATAAGGCTAGTCCGTTATCAACTTGAAAAACTGGCACCGAGTCGGTGCTTTTTTCTTGTCTAACGCCTCCGGGCTCTGGCGTGGAGGAAGAGTTTGGAGACGACGG
1127	ACCACGTCTCACACCGGCCTCCGGGGACTGCCGTGCGTTTTAGAGCTAGAAATAGCAAGTTAAAATAAGGCTAGTCCGTTATCAACTTGAAAAACTGGCACCGAGTCGGTGCTTTTTTCTTGTCTCACGCCTCCGGGGAACGCCGAGCCGGGCCCGTTTGGAGACGACGG
1128	ACCACGTCTCACACCGGCCTCCGGGGACTGCCGTGCGTTTTAGAGCTAGAAATAGCAAGTTAAAATAAGGCTAGTCCGTTATCAACTTGAAAAACTGGCACCGAGTCGGTGCTTTTTTCTTGTGCAACGCCTCCGGGGCCTGGCACGCAGGCTCCGTTTGGAGACGACGG
1129	ACCACGTCTCACACCGGCCTCCGGGGACTGCCGTGCGTTTTAGAGCTAGAAATAGCAAGTTAAAATAAGGCTAGTCCGTTATCAACTTGAAAAACTGGCACCGAGTCGGTGCTTTTTTCTTGTGGCACGCCTCGGGACACTGCCGGGCGGGGAGGGTTTGGAGACGACGG
1130	ACCACGTCTCACACCGGCCTCCGGGGACTGCCGTGCGTTTTAGAGCTAGAAATAGCAAGTTAAAATAAGGCTAGTCCGTTATCAACTTGAAAAACTGGCACCGAGTCGGTGCTTTTTTCTTGTGGTACGCCTCTGGGGACAGCCCTCCTGGCTGGGTTTGGAGACGACGG
1131	ACCACGTCTCACACCGGCCTCCGGGGACTGCCGTGCGTTTTAGAGCTAGAAATAGCAAGTTAAAATAAGGCTAGTCCGTTATCAACTTGAAAAACTGGCACCGAGTCGGTGCTTTTTTCTTGTGTCACGCCTCTGGGGGCTGCGGGGCGGGGAGAGTTTGGAGACGACGG
1132	ACCACGTCTCACACCGGCCTCCGGGGACTGCCGTGCGTTTTAGAGCTAGAAATAGCAAGTTAAAATAAGGCTAGTCCGTTATCAACTTGAAAAACTGGCACCGAGTCGGTGCTTTTTTCTTGTGTGACGCCTCTGGGGGCTGCTGTGAAGGCAGCGTTTGGAGACGACGG
1133	ACCACGTCTCACACCGGCCTCCGGGGACTGCCGTGCGTTTTAGAGCTAGAAATAGCAAGTTAAAATAAGGCTAGTCCGTTATCAACTTGAAAAACTGGCACCGAGTCGGTGCTTTTTTCTTGTTACACGCCTGCGGGGCCTGCCTGGCTGGTTTCGTTTGGAGACGACGG
1134	ACCACGTCTCACACCGGCCTCCGGGGACTGCCGTGCGTTTTAGAGCTAGAAATAGCAAGTTAAAATAAGGCTAGTCCGTTATCAACTTGAAAAACTGGCACCGAGTCGGTGCTTTTTTCTTGTTCCACGCCTGGGGAGACTGCGGTGCAGGAGGCGTTTGGAGACGACGG
1135	ACCACGTCTCACACCGGCCTCCGGGGACTGCCGTGCGTTTTAGAGCTAGAAATAGCAAGTTAAAATAAGGCTAGTCCGTTATCAACTTGAAAAACTGGCACCGAGTCGGTGCTTTTTTCTTGTTCTACGCCTTCTGGGACTGCAGTCCAGGCTGTGTTTGGAGACGACGG
1136	ACCACGTCTCACACCGGCCTCCGGGGACTGCCGTGCGTTTTAGAGCTAGAAATAGCAAGTTAAAATAAGGCTAGTCCGTTATCAACTTGAAAAACTGGCACCGAGTCGGTGCTTTTTTCTTGTTGCACGCGTCCGGGCGCTGCCGAGCCGGCACGGTTTGGAGACGACGG
1137	ACCACGTCTCACACCGGCCTCCGGGGACTGCCGTGCGTTTTAGAGCTAGAAATAGCAAGTTAAAATAAGGCTAGTCCGTTATCAACTTGAAAAACTGGCACCGAGTCGGTGCTTTTTTCTTGTTGTACGCGTCCGGGGACCCCCGCGCGGGTGCGGTTTGGAGACGACGG
1138	ACCACGTCTCACACCGGCCTCCGGGGACTGCCGTGCGTTTTAGAGCTAGAAATAGCAAGTTAAAATAAGGCTAGTCCGTTATCAACTTGAAAAACTGGCACCGAGTCGGTGCTTTTTTGAACAACAACGCGTGGGGGGACTGCCTTGCTGGCCCTGTTTGGAGACGACGG
1139	ACCACGTCTCACACCGGCCTCCGGGGACTGCCGTGCGTTTTAGAGCTAGAAATAGCAAGTTAAAATAAGGCTAGTCCGTTATCAACTTGAAAAACTGGCACCGAGTCGGTGCTTTTTTGAACAACCACGGCTCAGGGGCCTGCCTTGCAGGGGGAGTTTGGAGACGACGG
1140	ACCACGTCTCACACCGGCCTCCGGGGACTGCCGTGCGTTTTAGAGCTAGAAATAGCAAGTTAAAATAAGGCTAGTCCGTTATCAACTTGAAAAACTGGCACCGAGTCGGTGCTTTTTTGAACAACGACGGCTCCGGGGCCTGCGGCGCGGGCGCTGTTTGGAGACGACGG
1141	ACCACGTCTCACACCGGCCTCCGGGGACTGCCGTGCGTTTTAGAGCTAGAAATAGCAAGTTAAAATAAGGCTAGTCCGTTATCAACTTGAAAAACTGGCACCGAGTCGGTGCTTTTTTGAACAATCACTCCACCAGGGACTGCCGTCCAGGAGCAGTTTGGAGACGACGG
1142	ACCACGTCTCACACCGGCCTCCGGGGACTGCCGTGCGTTTTAGAGCTAGAAATAGCAAGTTAAAATAAGGCTAGTCCGTTATCAACTTGAAAAACTGGCACCGAGTCGGTGCTTTTTTGAACAATGACTCCCCTGGGGACTGCCCTGCAGGCCTAGTTTGGAGACGACGG
1143	ACCACGTCTCACACCGGCCTCCGGGGACTGCCGTGCGTTTTAGAGCTAGAAATAGCAAGTTAAAATAAGGCTAGTCCGTTATCAACTTGAAAAACTGGCACCGAGTCGGTGCTTTTTTGAACACCAACTCCTCCGGGGACTCGCGCGCGGGGCGGGTTTGGAGACGACGG
1144	ACCACGTCTCACACCGGCCTCCGGGGACTGCCGTGCGTTTTAGAGCTAGAAATAGCAAGTTAAAATAAGGCTAGTCCGTTATCAACTTGAAAAACTGGCACCGAGTCGGTGCTTTTTTGAACACCTACTCCTCCGGGGCCTGGCGAGCAGGGCAGGTTTGGAGACGACGG
1145	ACCACGTCTCACACCGGACCCTGGAAAAGCTGATGAGTTTTAGAGCTAGAAATAGCAAGTTAAAATAAGGCTAGTCCGTTATCAACTTGAAAAACTGGCACCGAGTCGGTGCTTTTTTGAACAGGTACCACCCTGGAATAGCTTAAGAGGGCAGAGTTTGGAGACGACGG
1146	ACCACGTCTCACACCGGACCCTGGAAAAGCTGATGAGTTTTAGAGCTAGAAATAGCAAGTTAAAATAAGGCTAGTCCGTTATCAACTTGAAAAACTGGCACCGAGTCGGTGCTTTTTTGAACTAGAACGATCCTGGAAAAGGTCATGTTGGTAGGGTTTGGAGACGACGG
1147	ACCACGTCTCACACCGGACCCTGGAAAAGCTGATGAGTTTTAGAGCTAGAAATAGCAAGTTAAAATAAGGCTAGTCCGTTATCAACTTGAAAAACTGGCACCGAGTCGGTGCTTTTTTGAACTATAACGATCCTGGACATGCTGGTGATGGAGCAGTTTGGAGACGACGG
1150	ACCACGTCTCACACCGGACCCTGGAAAAGCTGATGAGTTTTAGAGCTAGAAATAGCAAGTTAAAATAAGGCTAGTCCGTTATCAACTTGAAAAACTGGCACCGAGTCGGTGCTTTTTTGAACTGCAACGGCCCAGGAAAAGCTGCTCAGGGGAGAGTTTGGAGACGACGG
1151	ACCACGTCTCACACCGGACCCTGGAAAAGCTGATGAGTTTTAGAGCTAGAAATAGCAAGTTAAAATAAGGCTAGTCCGTTATCAACTTGAAAAACTGGCACCGAGTCGGTGCTTTTTTGAACTTATACGGCCCTGGAGGAGCTGATGCAGGTGTGGTTTGGAGACGACGG
1152	ACCACGTCTCACACCGGACCCTGGAAAAGCTGATGAGTTTTAGAGCTAGAAATAGCAAGTTAAAATAAGGCTAGTCCGTTATCAACTTGAAAAACTGGCACCGAGTCGGTGCTTTTTTGAACTTGAACGTCCCTGGAAAAGCAGAGAAGGGGTAGGTTTGGAGACGACGG
1171	ACCACGTCTCACACCGGACCCTGGAAAAGCTGATGAGTTTTAGAGCTAGAAATAGCAAGTTAAAATAAGGCTAGTCCGTTATCAACTTGAAAAACTGGCACCGAGTCGGTGCTTTTTTGAACACGTACAACACAGGCAAAGCTGATGATGGCCAGGTTTGGAGACGACGG
1172	ACCACGTCTCACACCGGACCCTGGAAAAGCTGATGAGTTTTAGAGCTAGAAATAGCAAGTTAAAATAAGGCTAGTCCGTTATCAACTTGAAAAACTGGCACCGAGTCGGTGCTTTTTTGAACACTAACAACCCTAGCAATGCTGATGAAGGTGGGGTTTGGAGACGACGG
1173	ACCACGTCTCACACCGGACCCTGGAAAAGCTGATGAGTTTTAGAGCTAGAAATAGCAAGTTAAAATAAGGCTAGTCCGTTATCAACTTGAAAAACTGGCACCGAGTCGGTGCTTTTTTGAACACTCACAACCCTGGAGAAATTGATGAGGGAAGGGTTTGGAGACGACGG
1174	ACCACGTCTCACACCGGACCCTGGAAAAGCTGATGAGTTTTAGAGCTAGAAATAGCAAGTTAAAATAAGGCTAGTCCGTTATCAACTTGAAAAACTGGCACCGAGTCGGTGCTTTTTTGAACAGGCACCACAGTGGAAAGGCTGATGAAGGGAATGTTTGGAGACGACGG
1175	ACCACGTCTCACACCGGACCCTGGAAAAGCTGATGAGTTTTAGAGCTAGAAATAGCAAGTTAAAATAAGGCTAGTCCGTTATCAACTTGAAAAACTGGCACCGAGTCGGTGCTTTTTTGAACAGTAACCACCTTGGAAAAGCTCTTGAGGGTGGCGTTTGGAGACGACGG
1176	ACCACGTCTCACACCGGACCCTGGAAAAGCTGATGAGTTTTAGAGCTAGAAATAGCAAGTTAAAATAAGGCTAGTCCGTTATCAACTTGAAAAACTGGCACCGAGTCGGTGCTTTTTTGAACAGTCACCACCTTGGTAAAGCTAATGAAGGGCCAGTTTGGAGACGACGG
1177	ACCACGTCTCACACCGGACCCTGGAAAAGCTGATGAGTTTTAGAGCTAGAAATAGCAAGTTAAAATAAGGCTAGTCCGTTATCAACTTGAAAAACTGGCACCGAGTCGGTGCTTTTTTGAACATATACGAACCTGAAAAATTTGATGATGGAGGTGTTTGGAGACGACGG
1178	ACCACGTCTCACACCGGACCCTGGAAAAGCTGATGAGTTTTAGAGCTAGAAATAGCAAGTTAAAATAAGGCTAGTCCGTTATCAACTTGAAAAACTGGCACCGAGTCGGTGCTTTTTTGAACATCCACGAACCTGGAAAAGCTGGGTATGGAGACGTTTGGAGACGACGG
1179	ACCACGTCTCACACCGGACCCTGGAAAAGCTGATGAGTTTTAGAGCTAGAAATAGCAAGTTAAAATAAGGCTAGTCCGTTATCAACTTGAAAAACTGGCACCGAGTCGGTGCTTTTTTGAACATCGACGAACCTGGAGAAACTGAAGACGGAGTCGTTTGGAGACGACGG
1180	ACCACGTCTCACACCGGACCCTGGAAAAGCTGATGAGTTTTAGAGCTAGAAATAGCAAGTTAAAATAAGGCTAGTCCGTTATCAACTTGAAAAACTGGCACCGAGTCGGTGCTTTTTTGAACATGCACGAACCTTGAAAACCTGATGCCGGTGGCGTTTGGAGACGACGG
1181	ACCACGTCTCACACCGGACCCTGGAAAAGCTGATGAGTTTTAGAGCTAGAAATAGCAAGTTAAAATAAGGCTAGTCCGTTATCAACTTGAAAAACTGGCACCGAGTCGGTGCTTTTTTGAACATGTACGACACTGAAAAAGTTGAAGATGGAGGCGTTTGGAGACGACGG
1182	ACCACGTCTCACACCGGACCCTGGAAAAGCTGATGAGTTTTAGAGCTAGAAATAGCAAGTTAAAATAAGGCTAGTCCGTTATCAACTTGAAAAACTGGCACCGAGTCGGTGCTTTTTTGAACATTAACGACACTGGAAACACTGATGAAGGATTTGTTTGGAGACGACGG
1183	ACCACGTCTCACACCGGACCCTGGAAAAGCTGATGAGTTTTAGAGCTAGAAATAGCAAGTTAAAATAAGGCTAGTCCGTTATCAACTTGAAAAACTGGCACCGAGTCGGTGCTTTTTTGAACATTGACGACACTGGAGAAGGTAATGAGGGGTGTGTTTGGAGACGACGG
1185	ACCACGTCTCACACCGGACCCTGGAAAAGCTGATGAGTTTTAGAGCTAGAAATAGCAAGTTAAAATAAGGCTAGTCCGTTATCAACTTGAAAAACTGGCACCGAGTCGGTGCTTTTTTGAACCAATACGACAGTGGCAAAGATGATGATGGCCATGTTTGGAGACGACGG
1187	ACCACGTCTCACACCGGACCCTGGAAAAGCTGATGAGTTTTAGAGCTAGAAATAGCAAGTTAAAATAAGGCTAGTCCGTTATCAACTTGAAAAACTGGCACCGAGTCGGTGCTTTTTTGAACCAGGACGACCATAGAAATGGTGATGAAGGGTCAGTTTGGAGACGACGG
1188	ACCACGTCTCACACCGGACCCTGGAAAAGCTGATGAGTTTTAGAGCTAGAAATAGCAAGTTAAAATAAGGCTAGTCCGTTATCAACTTGAAAAACTGGCACCGAGTCGGTGCTTTTTTGAACCGATACGACCCAGGAAAAGCAGGTGGAGGCTGAGTTTGGAGACGACGG
1189	ACCACGTCTCACACCGGACCCTGGAAAAGCTGATGAGTTTTAGAGCTAGAAATAGCAAGTTAAAATAAGGCTAGTCCGTTATCAACTTGAAAAACTGGCACCGAGTCGGTGCTTTTTTGAACCGCAACGACCCAGGAAAAGGTGAAGTGGGGGTAGTTTGGAGACGACGG
1190	ACCACGTCTCACACCGGACCCTGGAAAAGCTGATGAGTTTTAGAGCTAGAAATAGCAAGTTAAAATAAGGCTAGTCCGTTATCAACTTGAAAAACTGGCACCGAGTCGGTGCTTTTTTGAACCGCTACGACCCAGGGAAAGCTGCTGTTGGGACCGTTTGGAGACGACGG
1191	ACCACGTCTCACACCGGACCCTGGAAAAGCTGATGAGTTTTAGAGCTAGAAATAGCAAGTTAAAATAAGGCTAGTCCGTTATCAACTTGAAAAACTGGCACCGAGTCGGTGCTTTTTTGAACCGGAACGACCCAGTGAAAGCTCATGAAGGCTGGGTTTGGAGACGACGG
1193	ACCACGTCTCACACCGGACCCTGGAAAAGCTGATGAGTTTTAGAGCTAGAAATAGCAAGTTAAAATAAGGCTAGTCCGTTATCAACTTGAAAAACTGGCACCGAGTCGGTGCTTTTTTGAACCTACACGACCCTAGAAAATCGGATGGTGGAAAGGTTTGGAGACGACGG
1194	ACCACGTCTCACACCGGACCCTGGAAAAGCTGATGAGTTTTAGAGCTAGAAATAGCAAGTTAAAATAAGGCTAGTCCGTTATCAACTTGAAAAACTGGCACCGAGTCGGTGCTTTTTTGAACCTGCACGACCCTGGAAAAGCGTATCGGGGCCTCGTTTGGAGACGACGG
1195	ACCACGTCTCACACCGGACCCTGGAAAAGCTGATGAGTTTTAGAGCTAGAAATAGCAAGTTAAAATAAGGCTAGTCCGTTATCAACTTGAAAAACTGGCACCGAGTCGGTGCTTTTTTGAACCTGGACGACCCTGGAAAGCCGAATGAGGGAGGCGTTTGGAGACGACGG
1197	ACCACGTCTCACACCGGACCCTGGAAAAGCTGATGAGTTTTAGAGCTAGAAATAGCAAGTTAAAATAAGGCTAGTCCGTTATCAACTTGAAAAACTGGCACCGAGTCGGTGCTTTTTTGAACGAACACGACCCTGGAATAGAAGCTGAAGGCAGGGTTTGGAGACGACGG
1198	ACCACGTCTCACACCGGACCCTGGAAAAGCTGATGAGTTTTAGAGCTAGAAATAGCAAGTTAAAATAAGGCTAGTCCGTTATCAACTTGAAAAACTGGCACCGAGTCGGTGCTTTTTTGAACGACAACGACCCTGGAGAAGATGATGTTGGAAGGGTTTGGAGACGACGG
1199	ACCACGTCTCACACCGGACCCTGGAAAAGCTGATGAGTTTTAGAGCTAGAAATAGCAAGTTAAAATAAGGCTAGTCCGTTATCAACTTGAAAAACTGGCACCGAGTCGGTGCTTTTTTGAACGACCACGACCCTGGATAAACTGCTGGAGGCCCTGTTTGGAGACGACGG
1200	ACCACGTCTCACACCGGACCCTGGAAAAGCTGATGAGTTTTAGAGCTAGAAATAGCAAGTTAAAATAAGGCTAGTCCGTTATCAACTTGAAAAACTGGCACCGAGTCGGTGCTTTTTTGAACGACGACGACCCTGGCAAATCTGCAGATGGCTACGTTTGGAGACGACGG
1201	ACCACGTCTCACACCGGACCCTGGAAAAGCTGATGAGTTTTAGAGCTAGAAATAGCAAGTTAAAATAAGGCTAGTCCGTTATCAACTTGAAAAACTGGCACCGAGTCGGTGCTTTTTTGAACGAGAACGACCCTGGGAACGTTCATGAGGGGGCGGTTTGGAGACGACGG
1202	ACCACGTCTCACACCGGACCCTGGAAAAGCTGATGAGTTTTAGAGCTAGAAATAGCAAGTTAAAATAAGGCTAGTCCGTTATCAACTTGAAAAACTGGCACCGAGTCGGTGCTTTTTTGAACGCGCACGACCTTGGAGATGCTGGTGATGGCGGGGTTTGGAGACGACGG
1203	ACCACGTCTCACACCGGACCCTGGAAAAGCTGATGAGTTTTAGAGCTAGAAATAGCAAGTTAAAATAAGGCTAGTCCGTTATCAACTTGAAAAACTGGCACCGAGTCGGTGCTTTTTTGAACGGCCACGACTCTGGAAATTCTGATAAAGGGCTTGTTTGGAGACGACGG
1205	ACCACGTCTCACACCGGACCCTGGAAAAGCTGATGAGTTTTAGAGCTAGAAATAGCAAGTTAAAATAAGGCTAGTCCGTTATCAACTTGAAAAACTGGCACCGAGTCGGTGCTTTTTTGAACGGTGACGACTTAGGAAAAGCTTATGAAGGACAAGTTTGGAGACGACGG
1206	ACCACGTCTCACACCGGACCCTGGAAAAGCTGATGAGTTTTAGAGCTAGAAATAGCAAGTTAAAATAAGGCTAGTCCGTTATCAACTTGAAAAACTGGCACCGAGTCGGTGCTTTTTTGAACGTCAACGAGCCAGGAAAGGCTGAGGAAGGGAACGTTTGGAGACGACGG
1207	ACCACGTCTCACACCGGACCCTGGAAAAGCTGATGAGTTTTAGAGCTAGAAATAGCAAGTTAAAATAAGGCTAGTCCGTTATCAACTTGAAAAACTGGCACCGAGTCGGTGCTTTTTTGAACGTCTACGAGCCTGAAAAAGCTGACAAGGGACCCGTTTGGAGACGACGG
1208	ACCACGTCTCACACCGGACCCTGGAAAAGCTGATGAGTTTTAGAGCTAGAAATAGCAAGTTAAAATAAGGCTAGTCCGTTATCAACTTGAAAAACTGGCACCGAGTCGGTGCTTTTTTGAACGTGAACGAGCCTGGAACAGGTGGTGAGGGTGCAGTTTGGAGACGACGG
1209	ACCACGTCTCACACCGGACCCTGGAAAAGCTGATGAGTTTTAGAGCTAGAAATAGCAAGTTAAAATAAGGCTAGTCCGTTATCAACTTGAAAAACTGGCACCGAGTCGGTGCTTTTTTGAACGTGCACGAGCCTGGAAGAGCTGTTGGGGGAGGGGTTTGGAGACGACGG
1210	ACCACGTCTCACACCGGACCCTGGAAAAGCTGATGAGTTTTAGAGCTAGAAATAGCAAGTTAAAATAAGGCTAGTCCGTTATCAACTTGAAAAACTGGCACCGAGTCGGTGCTTTTTTGAACGTGGACGAGCCTTGAAAAGCAGATAAAGGAACAGTTTGGAGACGACGG
1211	ACCACGTCTCACACCGGACCCTGGAAAAGCTGATGAGTTTTAGAGCTAGAAATAGCAAGTTAAAATAAGGCTAGTCCGTTATCAACTTGAAAAACTGGCACCGAGTCGGTGCTTTTTTGAACGTTAACGAGGCAGGAAAAACTGATGAGGGAGTCGTTTGGAGACGACGG
1213	ACCACGTCTCACACCGGACCCTGGAAAAGCTGATGAGTTTTAGAGCTAGAAATAGCAAGTTAAAATAAGGCTAGTCCGTTATCAACTTGAAAAACTGGCACCGAGTCGGTGCTTTTTTGAACTACCACGATCCTGAAAAAGCAGCTGAGGGCCCTGTTTGGAGACGACGG
1214	ACCACGTCTCACACCGGACCCTGGAAAAGCTGATGAGTTTTAGAGCTAGAAATAGCAAGTTAAAATAAGGCTAGTCCGTTATCAACTTGAAAAACTGGCACCGAGTCGGTGCTTTTTTGAACTACGACGATCCTGCAAAACCTGTTGAAGGAATCGTTTGGAGACGACGG
1216	ACCACGTCTCACACCGGACCCTGGAAAAGCTGATGAGTTTTAGAGCTAGAAATAGCAAGTTAAAATAAGGCTAGTCCGTTATCAACTTGAAAAACTGGCACCGAGTCGGTGCTTTTTTGAACTCGGACGCCCCTGGCTCAGCTGATGAAGGTTGTGTTTGGAGACGACGG
1217	ACCACGTCTCACACCGGACCCTGGAAAAGCTGATGAGTTTTAGAGCTAGAAATAGCAAGTTAAAATAAGGCTAGTCCGTTATCAACTTGAAAAACTGGCACCGAGTCGGTGCTTTTTTGAACTCTAACGCCCCTGGGAAAGCTGGGGAAGGGCGCGTTTGGAGACGACGG
1218	ACCACGTCTCACACCGGACCCTGGAAAAGCTGATGAGTTTTAGAGCTAGAAATAGCAAGTTAAAATAAGGCTAGTCCGTTATCAACTTGAAAAACTGGCACCGAGTCGGTGCTTTTTTGAACTCTCACGCCCTTGGAAAATCTGATGAAGGTTACGTTTGGAGACGACGG
1219	ACCACGTCTCACACCGGACCCTGGAAAAGCTGATGAGTTTTAGAGCTAGAAATAGCAAGTTAAAATAAGGCTAGTCCGTTATCAACTTGAAAAACTGGCACCGAGTCGGTGCTTTTTTGAACTGCCACGGCCCAGGACAAACTGATGAAGGCACAGTTTGGAGACGACGG
1220	ACCACGTCTCACACCGGACCCTGGAAAAGCTGATGAGTTTTAGAGCTAGAAATAGCAAGTTAAAATAAGGCTAGTCCGTTATCAACTTGAAAAACTGGCACCGAGTCGGTGCTTTTTTGAACTGTGACGGCCCTGGAACTGCAGATGAAGGTGGAGTTTGGAGACGACGG
1222	ACCACGTCTCACACCGGACCCTGGAAAAGCTGATGAGTTTTAGAGCTAGAAATAGCAAGTTAAAATAAGGCTAGTCCGTTATCAACTTGAAAAACTGGCACCGAGTCGGTGCTTTTTTGAACTTGCACGTCCCTGGACAATCTGATTAGGGCGCAGTTTGGAGACGACGG
1223	ACCACGTCTCACACCGGACCCTGGAAAAGCTGATGAGTTTTAGAGCTAGAAATAGCAAGTTAAAATAAGGCTAGTCCGTTATCAACTTGAAAAACTGGCACCGAGTCGGTGCTTTTTTGAACTTGGACGTCCCTGGAGGAGCTGAGGAGGGAGCTGTTTGGAGACGACGG
1225	ACCACGTCTCACACCGGACCCTGGAAAAGCTGATGAGTTTTAGAGCTAGAAATAGCAAGTTAAAATAAGGCTAGTCCGTTATCAACTTGAAAAACTGGCACCGAGTCGGTGCTTTTTTGAAGAACCACTACCCAGGAGAAGCAGATGAGGGTGGTGTTTGGAGACGACGG
1226	ACCACGTCTCACACCGGACCCTGGAAAAGCTGATGAGTTTTAGAGCTAGAAATAGCAAGTTAAAATAAGGCTAGTCCGTTATCAACTTGAAAAACTGGCACCGAGTCGGTGCTTTTTTGAAGAACGACTACCCTGGAAGAATTGATGAAGGCTTCGTTTGGAGACGACGG
1227	ACCACGTCTCACACCGGACCCTGGAAAAGCTGATGAGTTTTAGAGCTAGAAATAGCAAGTTAAAATAAGGCTAGTCCGTTATCAACTTGAAAAACTGGCACCGAGTCGGTGCTTTTTTGAAGAAGCACTACCCTGGCAAAGCAGATGACGGCTGCGTTTGGAGACGACGG
1228	ACCACGTCTCACACCGGACCCTGGAAAAGCTGATGAGTTTTAGAGCTAGAAATAGCAAGTTAAAATAAGGCTAGTCCGTTATCAACTTGAAAAACTGGCACCGAGTCGGTGCTTTTTTGAAGAAGTACAAACATGGTAAAGCTGATGATGGACATGTTTGGAGACGACGG
1229	ACCACGTCTCACACCGGACCCTGGAAAAGCTGATGAGTTTTAGAGCTAGAAATAGCAAGTTAAAATAAGGCTAGTCCGTTATCAACTTGAAAAACTGGCACCGAGTCGGTGCTTTTTTGAAGACAGACAACTTTGGGAAAGCTGATGATGGGGACGTTTGGAGACGACGG
1230	ACCACGTCTCACACCGGACCCTGGAAAAGCTGATGAGTTTTAGAGCTAGAAATAGCAAGTTAAAATAAGGCTAGTCCGTTATCAACTTGAAAAACTGGCACCGAGTCGGTGCTTTTTTGAAGACATACACCCCTTGAGAAGCTGATGAAGGATATGTTTGGAGACGACGG
1231	ACCACGTCTCACACCGGACCCTGGAAAAGCTGATGAGTTTTAGAGCTAGAAATAGCAAGTTAAAATAAGGCTAGTCCGTTATCAACTTGAAAAACTGGCACCGAGTCGGTGCTTTTTTGAAGACCGACATGCCTGGAAAAGCTAATGAAGGAAAGGTTTGGAGACGACGG
1232	ACCACGTCTCACACCGGACCCTGGAAAAGCTGATGAGTTTTAGAGCTAGAAATAGCAAGTTAAAATAAGGCTAGTCCGTTATCAACTTGAAAAACTGGCACCGAGTCGGTGCTTTTTTGAAGACGTACCACCCTGGAAGAGCTGGTGTGGGAGAAGTTTGGAGACGACGG
1233	ACCACGTCTCACACCGGACCCTGGAAAAGCTGATGAGTTTTAGAGCTAGAAATAGCAAGTTAAAATAAGGCTAGTCCGTTATCAACTTGAAAAACTGGCACCGAGTCGGTGCTTTTTTGAAGAGATACCACCCTGGAGGAGCTGATGTTGGCTTTGTTTGGAGACGACGG
1234	ACCACGTCTCACACCGGACCCTGGAAAAGCTGATGAGTTTTAGAGCTAGAAATAGCAAGTTAAAATAAGGCTAGTCCGTTATCAACTTGAAAAACTGGCACCGAGTCGGTGCTTTTTTGAAGAGCTACCACCCTGGCAAATCTAATGACGGTGATGTTTGGAGACGACGG
1235	ACCACGTCTCACACCGGACCCTGGAAAAGCTGATGAGTTTTAGAGCTAGAAATAGCAAGTTAAAATAAGGCTAGTCCGTTATCAACTTGAAAAACTGGCACCGAGTCGGTGCTTTTTTGAAGAGGAACCACCCTGGTGAAGATGATGATGGTGTAGTTTGGAGACGACGG
1236	ACCACGTCTCACACCGGACCCTGGAAAAGCTGATGAGTTTTAGAGCTAGAAATAGCAAGTTAAAATAAGGCTAGTCCGTTATCAACTTGAAAAACTGGCACCGAGTCGGTGCTTTTTTGAAGAGTCACCAGCCTGGAGAAACTGATGATGGACTGGTTTGGAGACGACGG
1237	ACCACGTCTCACACCGGACCCTGGAAAAGCTGATGAGTTTTAGAGCTAGAAATAGCAAGTTAAAATAAGGCTAGTCCGTTATCAACTTGAAAAACTGGCACCGAGTCGGTGCTTTTTTGAAGAGTGACCATCCTGGAAAAGATGTTGATGGCTTGGTTTGGAGACGACGG
1238	ACCACGTCTCACACCGGACCCTGGAAAAGCTGATGAGTTTTAGAGCTAGAAATAGCAAGTTAAAATAAGGCTAGTCCGTTATCAACTTGAAAAACTGGCACCGAGTCGGTGCTTTTTTGAAGATACACCTCCCAGGAAAAGCTGCTGAGGGCCCCGTTTGGAGACGACGG
1239	ACCACGTCTCACACCGGACCCTGGAAAAGCTGATGAGTTTTAGAGCTAGAAATAGCAAGTTAAAATAAGGCTAGTCCGTTATCAACTTGAAAAACTGGCACCGAGTCGGTGCTTTTTTGAAGATAGACCTCCCTGGAAAAACTTATGAGGGGCACGTTTGGAGACGACGG
1240	ACCACGTCTCACACCGGACCCTGGAAAAGCTGATGAGTTTTAGAGCTAGAAATAGCAAGTTAAAATAAGGCTAGTCCGTTATCAACTTGAAAAACTGGCACCGAGTCGGTGCTTTTTTGAAGATATACGAACCAGGAAAAACTGTTGAAGGGGGTGTTTGGAGACGACGG
1241	ACCACGTCTCACACCGGACCCTGGAAAAGCTGATGAGTTTTAGAGCTAGAAATAGCAAGTTAAAATAAGGCTAGTCCGTTATCAACTTGAAAAACTGGCACCGAGTCGGTGCTTTTTTGAAGATGTACGACAATAGAAAAGCTAATGAAGGCCCCGTTTGGAGACGACGG
1242	ACCACGTCTCACACCGGACCCTGGAAAAGCTGATGAGTTTTAGAGCTAGAAATAGCAAGTTAAAATAAGGCTAGTCCGTTATCAACTTGAAAAACTGGCACCGAGTCGGTGCTTTTTTGAAGCAACACGACACTGGAAGAGCAAATGAGGGGATTGTTTGGAGACGACGG
1243	ACCACGTCTCACACCGGACCCTGGAAAAGCTGATGAGTTTTAGAGCTAGAAATAGCAAGTTAAAATAAGGCTAGTCCGTTATCAACTTGAAAAACTGGCACCGAGTCGGTGCTTTTTTGAAGCAAGACGACACTGGACATGATGATGATGGTGATGTTTGGAGACGACGG
1244	ACCACGTCTCACACCGGACCCTGGAAAAGCTGATGAGTTTTAGAGCTAGAAATAGCAAGTTAAAATAAGGCTAGTCCGTTATCAACTTGAAAAACTGGCACCGAGTCGGTGCTTTTTTGAAGCACAACGACAGTAGAAAAGCCGATGAAGGCATAGTTTGGAGACGACGG
1245	ACCACGTCTCACACCGGACCCTGGAAAAGCTGATGAGTTTTAGAGCTAGAAATAGCAAGTTAAAATAAGGCTAGTCCGTTATCAACTTGAAAAACTGGCACCGAGTCGGTGCTTTTTTGAAGCACTACGACCACGGCAAAGCTTATGAAGGTGGTGTTTGGAGACGACGG
1246	ACCACGTCTCACACCGGACCCTGGAAAAGCTGATGAGTTTTAGAGCTAGAAATAGCAAGTTAAAATAAGGCTAGTCCGTTATCAACTTGAAAAACTGGCACCGAGTCGGTGCTTTTTTGAAGCATAACGACCCTAGGAGAGCTGCTGAAGGTATTGTTTGGAGACGACGG
1247	ACCACGTCTCACACCGGACCCTGGAAAAGCTGATGAGTTTTAGAGCTAGAAATAGCAAGTTAAAATAAGGCTAGTCCGTTATCAACTTGAAAAACTGGCACCGAGTCGGTGCTTTTTTGAAGCATTACGACCCTGGAAATGCTCATCAAGGCCAGGTTTGGAGACGACGG
1248	ACCACGTCTCACACCGGACCCTGGAAAAGCTGATGAGTTTTAGAGCTAGAAATAGCAAGTTAAAATAAGGCTAGTCCGTTATCAACTTGAAAAACTGGCACCGAGTCGGTGCTTTTTTGAAGCCTAACGACCCTGGAAGTGCAAATGAGGGACCCGTTTGGAGACGACGG
1249	ACCACGTCTCACACCGGACCCTGGAAAAGCTGATGAGTTTTAGAGCTAGAAATAGCAAGTTAAAATAAGGCTAGTCCGTTATCAACTTGAAAAACTGGCACCGAGTCGGTGCTTTTTTGAAGCCTGACGACCCTGGACAGGGTGAAGAAGGAGGGGTTTGGAGACGACGG
1250	ACCACGTCTCACACCGGACCCTGGAAAAGCTGATGAGTTTTAGAGCTAGAAATAGCAAGTTAAAATAAGGCTAGTCCGTTATCAACTTGAAAAACTGGCACCGAGTCGGTGCTTTTTTGAAGCCTTACGACCCTGGAGAAGCTATTGGCGGAGTTGTTTGGAGACGACGG
1251	ACCACGTCTCACACCGGACCCTGGAAAAGCTGATGAGTTTTAGAGCTAGAAATAGCAAGTTAAAATAAGGCTAGTCCGTTATCAACTTGAAAAACTGGCACCGAGTCGGTGCTTTTTTGAAGCGACACGACCCTGGAGAAGCTGAAGCCGGGGACGTTTGGAGACGACGG
1252	ACCACGTCTCACACCGGACCCTGGAAAAGCTGATGAGTTTTAGAGCTAGAAATAGCAAGTTAAAATAAGGCTAGTCCGTTATCAACTTGAAAAACTGGCACCGAGTCGGTGCTTTTTTGAAGCGCAACGACCCTGGAGAATCTGAGTAAGGGTGGGTTTGGAGACGACGG
1255	ACCACGTCTCACACCGGACCCTGGAAAAGCTGATGAGTTTTAGAGCTAGAAATAGCAAGTTAAAATAAGGCTAGTCCGTTATCAACTTGAAAAACTGGCACCGAGTCGGTGCTTTTTTGAAGCGTGACGACCGTGGAATAGCTGTTGGAGGCAGAGTTTGGAGACGACGG
1256	ACCACGTCTCACACCGGACCCTGGAAAAGCTGATGAGTTTTAGAGCTAGAAATAGCAAGTTAAAATAAGGCTAGTCCGTTATCAACTTGAAAAACTGGCACCGAGTCGGTGCTTTTTTGAAGCTCCACGACCTAGGAAAATCAGATGAGGGTACCGTTTGGAGACGACGG
1257	ACCACGTCTCACACCGGACCCTGGAAAAGCTGATGAGTTTTAGAGCTAGAAATAGCAAGTTAAAATAAGGCTAGTCCGTTATCAACTTGAAAAACTGGCACCGAGTCGGTGCTTTTTTGAAGCTGCACGACCTTGGCAAAGCTGCTGGTGGCTCAGTTTGGAGACGACGG
1258	ACCACGTCTCACACCGGACCCTGGAAAAGCTGATGAGTTTTAGAGCTAGAAATAGCAAGTTAAAATAAGGCTAGTCCGTTATCAACTTGAAAAACTGGCACCGAGTCGGTGCTTTTTTGAAGCTGGACGACCTTTGAAAAGCCGATCAGGGCAAAGTTTGGAGACGACGG
1260	ACCACGTCTCACACCGGACCCTGGAAAAGCTGATGAGTTTTAGAGCTAGAAATAGCAAGTTAAAATAAGGCTAGTCCGTTATCAACTTGAAAAACTGGCACCGAGTCGGTGCTTTTTTGAAGGAGTACGAGCTGAGAAAAGCTGATGAGGGCTAAGTTTGGAGACGACGG
1261	ACCACGTCTCACACCGGACCCTGGAAAAGCTGATGAGTTTTAGAGCTAGAAATAGCAAGTTAAAATAAGGCTAGTCCGTTATCAACTTGAAAAACTGGCACCGAGTCGGTGCTTTTTTGAAGGATAACGAGGCTGGAAAAGCTGAAGCTGGAGTTGTTTGGAGACGACGG
1262	ACCACGTCTCACACCGGACCCTGGAAAAGCTGATGAGTTTTAGAGCTAGAAATAGCAAGTTAAAATAAGGCTAGTCCGTTATCAACTTGAAAAACTGGCACCGAGTCGGTGCTTTTTTGAAGGCATACGATCCTGGAAAGGCAGATAAGGGACTGGTTTGGAGACGACGG
1263	ACCACGTCTCACACCGGACCCTGGAAAAGCTGATGAGTTTTAGAGCTAGAAATAGCAAGTTAAAATAAGGCTAGTCCGTTATCAACTTGAAAAACTGGCACCGAGTCGGTGCTTTTTTGAAGGCGCACGATCCTTGAGAAGCTGATGACGGCCTTGTTTGGAGACGACGG
1264	ACCACGTCTCACACCGGACCCTGGAAAAGCTGATGAGTTTTAGAGCTAGAAATAGCAAGTTAAAATAAGGCTAGTCCGTTATCAACTTGAAAAACTGGCACCGAGTCGGTGCTTTTTTGAAGGTAGACGCCCCTGGAAAGCCTGTTGATGGCTCAGTTTGGAGACGACGG
1266	ACCACGTCTCACACCGGACCCTGGAAAAGCTGATGAGTTTTAGAGCTAGAAATAGCAAGTTAAAATAAGGCTAGTCCGTTATCAACTTGAAAAACTGGCACCGAGTCGGTGCTTTTTTGAAGGTCAACGCCCCTGGAGAAGCTGCTGCTGGGACGGTTTGGAGACGACGG
1267	ACCACGTCTCACACCGGACCCTGGAAAAGCTGATGAGTTTTAGAGCTAGAAATAGCAAGTTAAAATAAGGCTAGTCCGTTATCAACTTGAAAAACTGGCACCGAGTCGGTGCTTTTTTGAAGGTCCACGCCCCTGGGGAAGCTGATGCTGGAGAAGTTTGGAGACGACGG
1268	ACCACGTCTCACACCGGACCCTGGAAAAGCTGATGAGTTTTAGAGCTAGAAATAGCAAGTTAAAATAAGGCTAGTCCGTTATCAACTTGAAAAACTGGCACCGAGTCGGTGCTTTTTTGAAGGTCGACGCCCCTGTCAAAGGTGATGATGGTTTGGTTTGGAGACGACGG
1269	ACCACGTCTCACACCGGACCCTGGAAAAGCTGATGAGTTTTAGAGCTAGAAATAGCAAGTTAAAATAAGGCTAGTCCGTTATCAACTTGAAAAACTGGCACCGAGTCGGTGCTTTTTTGAAGTAACACGGCCCTGGAAAAGATGGGGAAGGGGCTGTTTGGAGACGACGG
1270	ACCACGTCTCACACCGGACCCTGGAAAAGCTGATGAGTTTTAGAGCTAGAAATAGCAAGTTAAAATAAGGCTAGTCCGTTATCAACTTGAAAAACTGGCACCGAGTCGGTGCTTTTTTGAAGTACGACGGTCCTGGGAAGGCTGATGAGGGCTGGGTTTGGAGACGACGG
1271	ACCACGTCTCACACCGGACCCTGGAAAAGCTGATGAGTTTTAGAGCTAGAAATAGCAAGTTAAAATAAGGCTAGTCCGTTATCAACTTGAAAAACTGGCACCGAGTCGGTGCTTTTTTGAAGTAGCACGTCACTGGATAAGCTGGTGATGGCACGGTTTGGAGACGACGG
1272	ACCACGTCTCACACCGGACCCTGGAAAAGCTGATGAGTTTTAGAGCTAGAAATAGCAAGTTAAAATAAGGCTAGTCCGTTATCAACTTGAAAAACTGGCACCGAGTCGGTGCTTTTTTGAAGTCCTACGTCCCTGGAGAAGCTGCTGGCGGACTAGTTTGGAGACGACGG
1273	ACCACGTCTCACACCGGACCCTGGAAAAGCTGATGAGTTTTAGAGCTAGAAATAGCAAGTTAAAATAAGGCTAGTCCGTTATCAACTTGAAAAACTGGCACCGAGTCGGTGCTTTTTTGAAGTCTAACGTCCCTGGATAGCCTGATGATGGGAGCGTTTGGAGACGACGG
1274	ACCACGTCTCACACCGGACCCTGGAAAAGCTGATGAGTTTTAGAGCTAGAAATAGCAAGTTAAAATAAGGCTAGTCCGTTATCAACTTGAAAAACTGGCACCGAGTCGGTGCTTTTTTGAAGTCTCACGTCCCTGGGCAAGCTGGTGATGGGCAGGTTTGGAGACGACGG
1275	ACCACGTCTCACACCGGACCCTGGAAAAGCTGATGAGTTTTAGAGCTAGAAATAGCAAGTTAAAATAAGGCTAGTCCGTTATCAACTTGAAAAACTGGCACCGAGTCGGTGCTTTTTTGAAGTCTTACTACCCTGGTAAAGATGATGATGGAAGCGTTTGGAGACGACGG
1276	ACCACGTCTCACACCGGACCCTGGAAAAGCTGATGAGTTTTAGAGCTAGAAATAGCAAGTTAAAATAAGGCTAGTCCGTTATCAACTTGAAAAACTGGCACCGAGTCGGTGCTTTTTTGAAGTGACACTACCTTGGAAAACCTCATGATGGTATTGTTTGGAGACGACGG
1277	ACCACGTCTCACACCGGACCCTGGAAAAGCTGATGAGTTTTAGAGCTAGAAATAGCAAGTTAAAATAAGGCTAGTCCGTTATCAACTTGAAAAACTGGCACCGAGTCGGTGCTTTTTTGAAGTGATACTACGCTGGAAAATCTCATGAGGGACTCGTTTGGAGACGACGG
1278	ACCACGTCTCACACCGGACCCTGGAAAAGCTGATGAGTTTTAGAGCTAGAAATAGCAAGTTAAAATAAGGCTAGTCCGTTATCAACTTGAAAAACTGGCACCGAGTCGGTGCTTTTTTGAAGTGCAACTTCCCTTGAAAACCTGATGAAGGAAGTGTTTGGAGACGACGG
1279	ACCACGTCTCACACCGCGCCATGGCGGTCTCCCGCCGTTTTAGAGCTAGAAATAGCAAGTTAAAATAAGGCTAGTCCGTTATCAACTTGAAAAACTGGCACCGAGTCGGTGCTTTTTTAATTACCAACCGCCAAGGGGGTCTCAGGCCTGGAATGGTTTGGAGACGACGG
1281	ACCACGTCTCACACCGCGCCATGGCGGTCTCCCGCCGTTTTAGAGCTAGAAATAGCAAGTTAAAATAAGGCTAGTCCGTTATCAACTTGAAAAACTGGCACCGAGTCGGTGCTTTTTTAATTACGGACCGCCAGCGAGGCCTCCCGCCTGGCACAGTTTGGAGACGACGG
1282	ACCACGTCTCACACCGCGCCATGGCGGTCTCCCGCCGTTTTAGAGCTAGAAATAGCAAGTTAAAATAAGGCTAGTCCGTTATCAACTTGAAAAACTGGCACCGAGTCGGTGCTTTTTTAATTAGATACCGCCATGGCGTCCTCGGGCCAGGCTCCGTTTGGAGACGACGG
1283	ACCACGTCTCACACCGCGCCATGGCGGTCTCCCGCCGTTTTAGAGCTAGAAATAGCAAGTTAAAATAAGGCTAGTCCGTTATCAACTTGAAAAACTGGCACCGAGTCGGTGCTTTTTTAATTAGCCACCGCCATTGCACTCTCCAGCCTGGGCAAGTTTGGAGACGACGG
1286	ACCACGTCTCACACCGCGCCATGGCGGTCTCCCGCCGTTTTAGAGCTAGAAATAGCAAGTTAAAATAAGGCTAGTCCGTTATCAACTTGAAAAACTGGCACCGAGTCGGTGCTTTTTTAATTATATACCGTCATGGTGGGCTTCCGCCGGGCCAGGTTTGGAGACGACGG
1293	ACCACGTCTCACACCGCGCCATGGCGGTCTCCCGCCGTTTTAGAGCTAGAAATAGCAAGTTAAAATAAGGCTAGTCCGTTATCAACTTGAAAAACTGGCACCGAGTCGGTGCTTTTTTAATTAACGACAGCCACGGCGGTGTCCCACCAGGAGGCGTTTGGAGACGACGG
1294	ACCACGTCTCACACCGCGCCATGGCGGTCTCCCGCCGTTTTAGAGCTAGAAATAGCAAGTTAAAATAAGGCTAGTCCGTTATCAACTTGAAAAACTGGCACCGAGTCGGTGCTTTTTTAATTAACTACAGCCATGGCGGTCACACGTCCGGATCTGTTTGGAGACGACGG
1295	ACCACGTCTCACACCGCGCCATGGCGGTCTCCCGCCGTTTTAGAGCTAGAAATAGCAAGTTAAAATAAGGCTAGTCCGTTATCAACTTGAAAAACTGGCACCGAGTCGGTGCTTTTTTAATTAAGGACCACCATGGCAGTTTCCAGCCAGGTGGGGTTTGGAGACGACGG
1296	ACCACGTCTCACACCGCGCCATGGCGGTCTCCCGCCGTTTTAGAGCTAGAAATAGCAAGTTAAAATAAGGCTAGTCCGTTATCAACTTGAAAAACTGGCACCGAGTCGGTGCTTTTTTAATTAAGTACCACCATGGCGGTCCCCTGACGGGGTAGGTTTGGAGACGACGG
1297	ACCACGTCTCACACCGCGCCATGGCGGTCTCCCGCCGTTTTAGAGCTAGAAATAGCAAGTTAAAATAAGGCTAGTCCGTTATCAACTTGAAAAACTGGCACCGAGTCGGTGCTTTTTTAATTAATGACCCCCATGGTGGTCACCTGCCAGGGCTCGTTTGGAGACGACGG
1298	ACCACGTCTCACACCGCGCCATGGCGGTCTCCCGCCGTTTTAGAGCTAGAAATAGCAAGTTAAAATAAGGCTAGTCCGTTATCAACTTGAAAAACTGGCACCGAGTCGGTGCTTTTTTAATTAATTACCCCCGCGGCGGTCTCCCGCCTGGCCCAGTTTGGAGACGACGG
1299	ACCACGTCTCACACCGCGCCATGGCGGTCTCCCGCCGTTTTAGAGCTAGAAATAGCAAGTTAAAATAAGGCTAGTCCGTTATCAACTTGAAAAACTGGCACCGAGTCGGTGCTTTTTTAATTACTCACCGCCAGGGCCGCTTCCCGCCGGGCGTTGTTTGGAGACGACGG
1300	ACCACGTCTCACACCGCGCCATGGCGGTCTCCCGCCGTTTTAGAGCTAGAAATAGCAAGTTAAAATAAGGCTAGTCCGTTATCAACTTGAAAAACTGGCACCGAGTCGGTGCTTTTTTAATTACTGACCGCCATAGCGTTCTACCACCTGGTGTAGTTTGGAGACGACGG
1301	ACCACGTCTCACACCGCGCCATGGCGGTCTCCCGCCGTTTTAGAGCTAGAAATAGCAAGTTAAAATAAGGCTAGTCCGTTATCAACTTGAAAAACTGGCACCGAGTCGGTGCTTTTTTAATTACTTACCGCCATGGCACTCTCCAGTCTGGATGAGTTTGGAGACGACGG
1302	ACCACGTCTCACACCGCGCCATGGCGGTCTCCCGCCGTTTTAGAGCTAGAAATAGCAAGTTAAAATAAGGCTAGTCCGTTATCAACTTGAAAAACTGGCACCGAGTCGGTGCTTTTTTAATTAGAGACCGCCATGGCGGCCACCCACTCGGCCCAGTTTGGAGACGACGG
1303	ACCACGTCTCACACCGCGCCATGGCGGTCTCCCGCCGTTTTAGAGCTAGAAATAGCAAGTTAAAATAAGGCTAGTCCGTTATCAACTTGAAAAACTGGCACCGAGTCGGTGCTTTTTTAATTAGCAACCGCCATGGTGCTCTCCCCCCAGGAGACGTTTGGAGACGACGG
1304	ACCACGTCTCACACCGCGCCATGGCGGTCTCCCGCCGTTTTAGAGCTAGAAATAGCAAGTTAAAATAAGGCTAGTCCGTTATCAACTTGAAAAACTGGCACCGAGTCGGTGCTTTTTTAATTAGGCACCGCCGTGGCCCTCTCCCACCAGGGACCGTTTGGAGACGACGG
1305	ACCACGTCTCACACCGCGCCATGGCGGTCTCCCGCCGTTTTAGAGCTAGAAATAGCAAGTTAAAATAAGGCTAGTCCGTTATCAACTTGAAAAACTGGCACCGAGTCGGTGCTTTTTTAATTATCGACCTCCAAGGCGGTCCCCCGCCTGGGGGCGTTTGGAGACGACGG
1306	ACCACGTCTCACACCGCGCCATGGCGGTCTCCCGCCGTTTTAGAGCTAGAAATAGCAAGTTAAAATAAGGCTAGTCCGTTATCAACTTGAAAAACTGGCACCGAGTCGGTGCTTTTTTAATTATCTACCTCCACTGCGGTCTCTCGCCAGGCCCTGTTTGGAGACGACGG
1307	ACCACGTCTCACACCGCGCCATGGCGGTCTCCCGCCGTTTTAGAGCTAGAAATAGCAAGTTAAAATAAGGCTAGTCCGTTATCAACTTGAAAAACTGGCACCGAGTCGGTGCTTTTTTAATTATGCACGGCCATGGCGGTCTCCAGGTGGGTCTTGTTTGGAGACGACGG
1308	ACCACGTCTCACACCGCGCCATGGCGGTCTCCCGCCGTTTTAGAGCTAGAAATAGCAAGTTAAAATAAGGCTAGTCCGTTATCAACTTGAAAAACTGGCACCGAGTCGGTGCTTTTTTAATTATGGACAGCCACGGCGGTCTCTAGCCTGGCCCCGTTTGGAGACGACGG
1309	ACCACGTCTCACACCGCGCCATGGCGGTCTCCCGCCGTTTTAGAGCTAGAAATAGCAAGTTAAAATAAGGCTAGTCCGTTATCAACTTGAAAAACTGGCACCGAGTCGGTGCTTTTTTAATTATTCACCACTCTGGCGGTCTCCCTCCAGGATCCGTTTGGAGACGACGG
1310	ACCACGTCTCACACCGCGCCATGGCGGTCTCCCGCCGTTTTAGAGCTAGAAATAGCAAGTTAAAATAAGGCTAGTCCGTTATCAACTTGAAAAACTGGCACCGAGTCGGTGCTTTTTTAATTATTGACCATCATGTCGGTCTCCCTCCTGGGAAAGTTTGGAGACGACGG
1311	ACCACGTCTCACACCGCGCCATGGCGGTCTCCCGCCGTTTTAGAGCTAGAAATAGCAAGTTAAAATAAGGCTAGTCCGTTATCAACTTGAAAAACTGGCACCGAGTCGGTGCTTTTTTAATTCAACACCCCCATGCCAGTCTCCCGCTTGGCTGCGTTTGGAGACGACGG
1312	ACCACGTCTCACACCGCGCCATGGCGGTCTCCCGCCGTTTTAGAGCTAGAAATAGCAAGTTAAAATAAGGCTAGTCCGTTATCAACTTGAAAAACTGGCACCGAGTCGGTGCTTTTTTAATTCAAGACCCCCATGCCGCTCTACCGCCTGGTAGCGTTTGGAGACGACGG
1313	ACCACGTCTCACACCGCGCCATGGCGGTCTCCCGCCGTTTTAGAGCTAGAAATAGCAAGTTAAAATAAGGCTAGTCCGTTATCAACTTGAAAAACTGGCACCGAGTCGGTGCTTTTTTAATTCACCACCCCCATGGCTGTCCCCCACCGGGACCCGTTTGGAGACGACGG
1314	ACCACGTCTCACACCGCGCCATGGCGGTCTCCCGCCGTTTTAGAGCTAGAAATAGCAAGTTAAAATAAGGCTAGTCCGTTATCAACTTGAAAAACTGGCACCGAGTCGGTGCTTTTTTAATTCAGGACCCCCTTGGCGGCCCCCCGCCCGGCACCGTTTGGAGACGACGG
1315	ACCACGTCTCACACCGCGCCATGGCGGTCTCCCGCCGTTTTAGAGCTAGAAATAGCAAGTTAAAATAAGGCTAGTCCGTTATCAACTTGAAAAACTGGCACCGAGTCGGTGCTTTTTTAATTCAGTACCCTCATGGCCGTCTTCCGCCCGGTGTTGTTTGGAGACGACGG
1316	ACCACGTCTCACACCGCGCCATGGCGGTCTCCCGCCGTTTTAGAGCTAGAAATAGCAAGTTAAAATAAGGCTAGTCCGTTATCAACTTGAAAAACTGGCACCGAGTCGGTGCTTTTTTAATTCATGACCGCCAAAGCCGGCTCCCGCCTGGCGAAGTTTGGAGACGACGG
1317	ACCACGTCTCACACCGCGCCATGGCGGTCTCCCGCCGTTTTAGAGCTAGAAATAGCAAGTTAAAATAAGGCTAGTCCGTTATCAACTTGAAAAACTGGCACCGAGTCGGTGCTTTTTTAATTCATTACCGCCACTGAGGTCTCCAGCCTGGGCGAGTTTGGAGACGACGG
1318	ACCACGTCTCACACCGCGCCATGGCGGTCTCCCGCCGTTTTAGAGCTAGAAATAGCAAGTTAAAATAAGGCTAGTCCGTTATCAACTTGAAAAACTGGCACCGAGTCGGTGCTTTTTTAATTCCTCACCGCCATGGCCGTCTGCTCCCAGGGCTCGTTTGGAGACGACGG
1319	ACCACGTCTCACACCGCGCCATGGCGGTCTCCCGCCGTTTTAGAGCTAGAAATAGCAAGTTAAAATAAGGCTAGTCCGTTATCAACTTGAAAAACTGGCACCGAGTCGGTGCTTTTTTAATTCCTGACCGCCATGGCGCTGGCCTGCCAGGCCTTGTTTGGAGACGACGG
1320	ACCACGTCTCACACCGCGCCATGGCGGTCTCCCGCCGTTTTAGAGCTAGAAATAGCAAGTTAAAATAAGGCTAGTCCGTTATCAACTTGAAAAACTGGCACCGAGTCGGTGCTTTTTTAATTCGAGACCGCCATGGCGGCCACCGACCTGGAGCGGTTTGGAGACGACGG
1321	ACCACGTCTCACACCGCGCCATGGCGGTCTCCCGCCGTTTTAGAGCTAGAAATAGCAAGTTAAAATAAGGCTAGTCCGTTATCAACTTGAAAAACTGGCACCGAGTCGGTGCTTTTTTAATTCGATACCGCCATGGCGGGCTTCCCCAGGGACAGGTTTGGAGACGACGG
1322	ACCACGTCTCACACCGCGCCATGGCGGTCTCCCGCCGTTTTAGAGCTAGAAATAGCAAGTTAAAATAAGGCTAGTCCGTTATCAACTTGAAAAACTGGCACCGAGTCGGTGCTTTTTTAATTCGCTACCGCCATGTTGGTCTCCTTCCAGGCGCGGTTTGGAGACGACGG
1323	ACCACGTCTCACACCGCGCCATGGCGGTCTCCCGCCGTTTTAGAGCTAGAAATAGCAAGTTAAAATAAGGCTAGTCCGTTATCAACTTGAAAAACTGGCACCGAGTCGGTGCTTTTTTAATTCGGAACCGCCATTGCACTCTCCAGCCCGGGCAAGTTTGGAGACGACGG
1324	ACCACGTCTCACACCGCGCCATGGCGGTCTCCCGCCGTTTTAGAGCTAGAAATAGCAAGTTAAAATAAGGCTAGTCCGTTATCAACTTGAAAAACTGGCACCGAGTCGGTGCTTTTTTAATTCTATACCGCCCTGGCGGTGCCCCTCCCGGCCACGTTTGGAGACGACGG
1325	ACCACGTCTCACACCGCGCCATGGCGGTCTCCCGCCGTTTTAGAGCTAGAAATAGCAAGTTAAAATAAGGCTAGTCCGTTATCAACTTGAAAAACTGGCACCGAGTCGGTGCTTTTTTAATTCTCAACCGCCGCGGGGGTCCCCCGCCCGGCCCCGTTTGGAGACGACGG
1326	ACCACGTCTCACACCGCGCCATGGCGGTCTCCCGCCGTTTTAGAGCTAGAAATAGCAAGTTAAAATAAGGCTAGTCCGTTATCAACTTGAAAAACTGGCACCGAGTCGGTGCTTTTTTAATTCTCCACCGCCGCTGCGGTCGCCCGCCTGGCATGGTTTGGAGACGACGG
1327	ACCACGTCTCACACCGCGCCATGGCGGTCTCCCGCCGTTTTAGAGCTAGAAATAGCAAGTTAAAATAAGGCTAGTCCGTTATCAACTTGAAAAACTGGCACCGAGTCGGTGCTTTTTTAATTCTGCACGACCATGGCAGCCTCCCGCCTGGACTTGTTTGGAGACGACGG
1328	ACCACGTCTCACACCGCGCCATGGCGGTCTCCCGCCGTTTTAGAGCTAGAAATAGCAAGTTAAAATAAGGCTAGTCCGTTATCAACTTGAAAAACTGGCACCGAGTCGGTGCTTTTTTAATTCTTCACGGCCATGCCTGTCTCCTGCCCGGGGTCGTTTGGAGACGACGG
1329	ACCACGTCTCACACCGCTGCTGCTGCTGCTGCTGGAGTTTTAGAGCTAGAAATAGCAAGTTAAAATAAGGCTAGTCCGTTATCAACTTGAAAAACTGGCACCGAGTCGGTGCTTTTTTAATTGTCCACATGCTGCTGCTGCTGCTCCAGGGATCAGTTTGGAGACGACGG
1331	ACCACGTCTCACACCGCTGCTGCTGCTGCTGCTGGAGTTTTAGAGCTAGAAATAGCAAGTTAAAATAAGGCTAGTCCGTTATCAACTTGAAAAACTGGCACCGAGTCGGTGCTTTTTTACAACAAGACATGCTGCTGCTGCTGGTCCAGGGGCCCGTTTGGAGACGACGG
1333	ACCACGTCTCACACCGCTGCTGCTGCTGCTGCTGGAGTTTTAGAGCTAGAAATAGCAAGTTAAAATAAGGCTAGTCCGTTATCAACTTGAAAAACTGGCACCGAGTCGGTGCTTTTTTACAACGATACATGGTGCTGCTGCAGCTTGAGGGCCAGGTTTGGAGACGACGG
1335	ACCACGTCTCACACCGCTGCTGCTGCTGCTGCTGGAGTTTTAGAGCTAGAAATAGCAAGTTAAAATAAGGCTAGTCCGTTATCAACTTGAAAAACTGGCACCGAGTCGGTGCTTTTTTACAACTGCACCAGCAGCAGCTGCTGCTGGCAGGGAGGGTTTGGAGACGACGG
1336	ACCACGTCTCACACCGCTGCTGCTGCTGCTGCTGGAGTTTTAGAGCTAGAAATAGCAAGTTAAAATAAGGCTAGTCCGTTATCAACTTGAAAAACTGGCACCGAGTCGGTGCTTTTTTACAAGAATACCAGCTGCAGCTGCACCTGGAAGGGTGGGTTTGGAGACGACGG
1338	ACCACGTCTCACACCGCTGCTGCTGCTGCTGCTGGAGTTTTAGAGCTAGAAATAGCAAGTTAAAATAAGGCTAGTCCGTTATCAACTTGAAAAACTGGCACCGAGTCGGTGCTTTTTTACAAGAGCACCAGCTGCAGCTGCTGATGAAGGGAGGGGTTTGGAGACGACGG
1339	ACCACGTCTCACACCGCTGCTGCTGCTGCTGCTGGAGTTTTAGAGCTAGAAATAGCAAGTTAAAATAAGGCTAGTCCGTTATCAACTTGAAAAACTGGCACCGAGTCGGTGCTTTTTTACAAGGCTACCAGCTGCTGCTGCAGCTGCTGGGTGGAGTTTGGAGACGACGG
1341	ACCACGTCTCACACCGCTGCTGCTGCTGCTGCTGGAGTTTTAGAGCTAGAAATAGCAAGTTAAAATAAGGCTAGTCCGTTATCAACTTGAAAAACTGGCACCGAGTCGGTGCTTTTTTACAATACGACCATCCGCAGCTGCTGCTGGAAGGGTGGGTTTGGAGACGACGG
1343	ACCACGTCTCACACCGCTGCTGCTGCTGCTGCTGGAGTTTTAGAGCTAGAAATAGCAAGTTAAAATAAGGCTAGTCCGTTATCAACTTGAAAAACTGGCACCGAGTCGGTGCTTTTTTACACAACAACCCTCTGCTGCTGCCTCTGGAAGGTCTGGTTTGGAGACGACGG
1344	ACCACGTCTCACACCGCTGCTGCTGCTGCTGCTGGAGTTTTAGAGCTAGAAATAGCAAGTTAAAATAAGGCTAGTCCGTTATCAACTTGAAAAACTGGCACCGAGTCGGTGCTTTTTTACACACAGACCGGCTGCAGCTGCATCTGGAAGGGCAAGTTTGGAGACGACGG
1345	ACCACGTCTCACACCGCTGCTGCTGCTGCTGCTGGAGTTTTAGAGCTAGAAATAGCAAGTTAAAATAAGGCTAGTCCGTTATCAACTTGAAAAACTGGCACCGAGTCGGTGCTTTTTTACACATATACCTACTGCTGCTGCTGCTGTTTGGCACTGTTTGGAGACGACGG
1347	ACCACGTCTCACACCGCTGCTGCTGCTGCTGCTGGAGTTTTAGAGCTAGAAATAGCAAGTTAAAATAAGGCTAGTCCGTTATCAACTTGAAAAACTGGCACCGAGTCGGTGCTTTTTTACACCAAGACCTAGTGCTGCTGCTGCTGGGAGGACGAGTTTGGAGACGACGG
1349	ACCACGTCTCACACCGCTGCTGCTGCTGCTGCTGGAGTTTTAGAGCTAGAAATAGCAAGTTAAAATAAGGCTAGTCCGTTATCAACTTGAAAAACTGGCACCGAGTCGGTGCTTTTTTACACCAGTACCTCATGCTGCTGCTCCTGGGTGGACCCGTTTGGAGACGACGG
1351	ACCACGTCTCACACCGCTGCTGCTGCTGCTGCTGGAGTTTTAGAGCTAGAAATAGCAAGTTAAAATAAGGCTAGTCCGTTATCAACTTGAAAAACTGGCACCGAGTCGGTGCTTTTTTACACCGGAACCTCCTGCCTCTGCTACTGGATGGAAGGGTTTGGAGACGACGG
1352	ACCACGTCTCACACCGCTGCTGCTGCTGCTGCTGGAGTTTTAGAGCTAGAAATAGCAAGTTAAAATAAGGCTAGTCCGTTATCAACTTGAAAAACTGGCACCGAGTCGGTGCTTTTTTACACTATAACCTGCAGCTGCTGCTGGAGAATGGTTGCGTTTGGAGACGACGG
1355	ACCACGTCTCACACCGCTGCTGCTGCTGCTGCTGGAGTTTTAGAGCTAGAAATAGCAAGTTAAAATAAGGCTAGTCCGTTATCAACTTGAAAAACTGGCACCGAGTCGGTGCTTTTTTACACTATTACCTGCAGCTGCTGCTGGTTTAGGGCCACGTTTGGAGACGACGG
1356	ACCACGTCTCACACCGCTGCTGCTGCTGCTGCTGGAGTTTTAGAGCTAGAAATAGCAAGTTAAAATAAGGCTAGTCCGTTATCAACTTGAAAAACTGGCACCGAGTCGGTGCTTTTTTACAGACGCACCTGCTAGTGCTGCTGCTGCTGGGAGGAGTTTGGAGACGACGG
1358	ACCACGTCTCACACCGCTGCTGCTGCTGCTGCTGGAGTTTTAGAGCTAGAAATAGCAAGTTAAAATAAGGCTAGTCCGTTATCAACTTGAAAAACTGGCACCGAGTCGGTGCTTTTTTACAGACTCACCTGCTCATGGTCCTGCTGGACGGCCAGGTTTGGAGACGACGG
1360	ACCACGTCTCACACCGCTGCTGCTGCTGCTGCTGGAGTTTTAGAGCTAGAAATAGCAAGTTAAAATAAGGCTAGTCCGTTATCAACTTGAAAAACTGGCACCGAGTCGGTGCTTTTTTACAGCAAGACCTGCTGATGCTGCTGGTCCAGGGACCAGTTTGGAGACGACGG
1365	ACCACGTCTCACACCGCTGCTGCTGCTGCTGCTGGAGTTTTAGAGCTAGAAATAGCAAGTTAAAATAAGGCTAGTCCGTTATCAACTTGAAAAACTGGCACCGAGTCGGTGCTTTTTTACAGCAGCACCTGCTGATGCTGCTGGTCTATGGATCAGTTTGGAGACGACGG
1366	ACCACGTCTCACACCGCTGCTGCTGCTGCTGCTGGAGTTTTAGAGCTAGAAATAGCAAGTTAAAATAAGGCTAGTCCGTTATCAACTTGAAAAACTGGCACCGAGTCGGTGCTTTTTTACAGCCAGACCTGCTGCAGCTGCCGCTGCTCGGCCTCGTTTGGAGACGACGG
1368	ACCACGTCTCACACCGCTGCTGCTGCTGCTGCTGGAGTTTTAGAGCTAGAAATAGCAAGTTAAAATAAGGCTAGTCCGTTATCAACTTGAAAAACTGGCACCGAGTCGGTGCTTTTTTACAGCCGTACCTGCTGCAGCTGCTGCTAACTGGCATGGTTTGGAGACGACGG
1369	ACCACGTCTCACACCGCTGCTGCTGCTGCTGCTGGAGTTTTAGAGCTAGAAATAGCAAGTTAAAATAAGGCTAGTCCGTTATCAACTTGAAAAACTGGCACCGAGTCGGTGCTTTTTTACAGCGCAACCTGCTGCAGCTGTGGCTGAAAGGGGCCGTTTGGAGACGACGG
1370	ACCACGTCTCACACCGCTGCTGCTGCTGCTGCTGGAGTTTTAGAGCTAGAAATAGCAAGTTAAAATAAGGCTAGTCCGTTATCAACTTGAAAAACTGGCACCGAGTCGGTGCTTTTTTACAGCGTTACCTGCTGCCGCGGCTGCTGTGGGGGCTGGTTTGGAGACGACGG
1373	ACCACGTCTCACACCGCTGCTGCTGCTGCTGCTGGAGTTTTAGAGCTAGAAATAGCAAGTTAAAATAAGGCTAGTCCGTTATCAACTTGAAAAACTGGCACCGAGTCGGTGCTTTTTTACAGCTTCACCTGCTGCCGCTGCTGCTGCTGGGAGGAGTTTGGAGACGACGG
1375	ACCACGTCTCACACCGCTGCTGCTGCTGCTGCTGGAGTTTTAGAGCTAGAAATAGCAAGTTAAAATAAGGCTAGTCCGTTATCAACTTGAAAAACTGGCACCGAGTCGGTGCTTTTTTACAGGATGACCTGCTGCTACTGCTGCTGCTTGGTTTTGTTTGGAGACGACGG
1377	ACCACGTCTCACACCGCTGCTGCTGCTGCTGCTGGAGTTTTAGAGCTAGAAATAGCAAGTTAAAATAAGGCTAGTCCGTTATCAACTTGAAAAACTGGCACCGAGTCGGTGCTTTTTTACAGGTACACCTGCTGCTCCTGCTGCCCCATGGGCTGGTTTGGAGACGACGG
1380	ACCACGTCTCACACCGCTGCTGCTGCTGCTGCTGGAGTTTTAGAGCTAGAAATAGCAAGTTAAAATAAGGCTAGTCCGTTATCAACTTGAAAAACTGGCACCGAGTCGGTGCTTTTTTACAGTCACACCTGCTGCTGCAGCAGTGGGATGGGCAGGTTTGGAGACGACGG
1382	ACCACGTCTCACACCGCTGCTGCTGCTGCTGCTGGAGTTTTAGAGCTAGAAATAGCAAGTTAAAATAAGGCTAGTCCGTTATCAACTTGAAAAACTGGCACCGAGTCGGTGCTTTTTTACAGTCGAACCTGCTGCTGCAGCTGCTGGGTGGAGCGGTTTGGAGACGACGG
1384	ACCACGTCTCACACCGCTGCTGCTGCTGCTGCTGGAGTTTTAGAGCTAGAAATAGCAAGTTAAAATAAGGCTAGTCCGTTATCAACTTGAAAAACTGGCACCGAGTCGGTGCTTTTTTACAGTGTAACCTGCTGCTGCCGCTGCTGCTGGGCCTGGTTTGGAGACGACGG
1385	ACCACGTCTCACACCGCTGCTGCTGCTGCTGCTGGAGTTTTAGAGCTAGAAATAGCAAGTTAAAATAAGGCTAGTCCGTTATCAACTTGAAAAACTGGCACCGAGTCGGTGCTTTTTTACATACGTACCTGCTGCTGCTGCCAGTGGTGGGAGGTGTTTGGAGACGACGG
1387	ACCACGTCTCACACCGCTGCTGCTGCTGCTGCTGGAGTTTTAGAGCTAGAAATAGCAAGTTAAAATAAGGCTAGTCCGTTATCAACTTGAAAAACTGGCACCGAGTCGGTGCTTTTTTACATAGATACCTGCTGCTGCTGCCGCCGCCGGGGAAGGTTTGGAGACGACGG
1390	ACCACGTCTCACACCGCTGCTGCTGCTGCTGCTGGAGTTTTAGAGCTAGAAATAGCAAGTTAAAATAAGGCTAGTCCGTTATCAACTTGAAAAACTGGCACCGAGTCGGTGCTTTTTTACATATTCACCTGCTGCTGCTGCTGATCTGGGGACATGTTTGGAGACGACGG
1391	ACCACGTCTCACACCGCTGCTGCTGCTGCTGCTGGAGTTTTAGAGCTAGAAATAGCAAGTTAAAATAAGGCTAGTCCGTTATCAACTTGAAAAACTGGCACCGAGTCGGTGCTTTTTTACATCAATACCTGCTGCTGCTGCTGCAAAAAGGAAGAGTTTGGAGACGACGG
1392	ACCACGTCTCACACCGCTGCTGCTGCTGCTGCTGGAGTTTTAGAGCTAGAAATAGCAAGTTAAAATAAGGCTAGTCCGTTATCAACTTGAAAAACTGGCACCGAGTCGGTGCTTTTTTACATCCAGACCTGCTGCTGCTGCTGCTCCAGGGACCCGTTTGGAGACGACGG
1394	ACCACGTCTCACACCGCTGCTGCTGCTGCTGCTGGAGTTTTAGAGCTAGAAATAGCAAGTTAAAATAAGGCTAGTCCGTTATCAACTTGAAAAACTGGCACCGAGTCGGTGCTTTTTTACATCCTAACCTGCTGCTGCTGCTGCTCCCAGGCTGGGTTTGGAGACGACGG
1395	ACCACGTCTCACACCGCTGCTGCTGCTGCTGCTGGAGTTTTAGAGCTAGAAATAGCAAGTTAAAATAAGGCTAGTCCGTTATCAACTTGAAAAACTGGCACCGAGTCGGTGCTTTTTTACATCCTCACCTGCTGCTGCTGCTGCTCCTGGGTCCCGTTTGGAGACGACGG
1398	ACCACGTCTCACACCGCTGCTGCTGCTGCTGCTGGAGTTTTAGAGCTAGAAATAGCAAGTTAAAATAAGGCTAGTCCGTTATCAACTTGAAAAACTGGCACCGAGTCGGTGCTTTTTTACATCGCAACCTGCTGCTGCTGCTGCTCCTTGGGAAAGTTTGGAGACGACGG
1399	ACCACGTCTCACACCGCTGCTGCTGCTGCTGCTGGAGTTTTAGAGCTAGAAATAGCAAGTTAAAATAAGGCTAGTCCGTTATCAACTTGAAAAACTGGCACCGAGTCGGTGCTTTTTTACATCTACACCTGCTGCTGCTGCTGCTGCCGGGCCGCGTTTGGAGACGACGG
1400	ACCACGTCTCACACCGCTGCTGCTGCTGCTGCTGGAGTTTTAGAGCTAGAAATAGCAAGTTAAAATAAGGCTAGTCCGTTATCAACTTGAAAAACTGGCACCGAGTCGGTGCTTTTTTACATCTAGACCTGCTGCTGCTGCTGCTGCCTGGGGCCGTTTGGAGACGACGG
1401	ACCACGTCTCACACCGCTGCTGCTGCTGCTGCTGGAGTTTTAGAGCTAGAAATAGCAAGTTAAAATAAGGCTAGTCCGTTATCAACTTGAAAAACTGGCACCGAGTCGGTGCTTTTTTACATCTATACCTGCTGCTGCTGCTGCTGCGAGGCTGCGTTTGGAGACGACGG
1403	ACCACGTCTCACACCGCTGCTGCTGCTGCTGCTGGAGTTTTAGAGCTAGAAATAGCAAGTTAAAATAAGGCTAGTCCGTTATCAACTTGAAAAACTGGCACCGAGTCGGTGCTTTTTTACATCTCCACCTGCTGCTGCTGCTGCTGCGGGGGCCCGTTTGGAGACGACGG
1404	ACCACGTCTCACACCGCTGCTGCTGCTGCTGCTGGAGTTTTAGAGCTAGAAATAGCAAGTTAAAATAAGGCTAGTCCGTTATCAACTTGAAAAACTGGCACCGAGTCGGTGCTTTTTTACATCTCGACCTGCTGCTGCTGCTGCTGCTAGGCTTAGTTTGGAGACGACGG
1405	ACCACGTCTCACACCGCTGCTGCTGCTGCTGCTGGAGTTTTAGAGCTAGAAATAGCAAGTTAAAATAAGGCTAGTCCGTTATCAACTTGAAAAACTGGCACCGAGTCGGTGCTTTTTTACATCTGCACCTGCTGCTGCTGCTGCTGCTCGGGCTGGTTTGGAGACGACGG
1407	ACCACGTCTCACACCGCTGCTGCTGCTGCTGCTGGAGTTTTAGAGCTAGAAATAGCAAGTTAAAATAAGGCTAGTCCGTTATCAACTTGAAAAACTGGCACCGAGTCGGTGCTTTTTTACATCTTAACCTGCTGCTGCTGCTGCTGCTGGGAAAGGTTTGGAGACGACGG
1419	ACCACGTCTCACACCGCTGCTGCTGCTGCTGCTGGAGTTTTAGAGCTAGAAATAGCAAGTTAAAATAAGGCTAGTCCGTTATCAACTTGAAAAACTGGCACCGAGTCGGTGCTTTTTTACATGCACACCTGCTGCTGCTGCTGCTGCTTGGGGCGGTTTGGAGACGACGG
1422	ACCACGTCTCACACCGCTGCTGCTGCTGCTGCTGGAGTTTTAGAGCTAGAAATAGCAAGTTAAAATAAGGCTAGTCCGTTATCAACTTGAAAAACTGGCACCGAGTCGGTGCTTTTTTACATGCGCACCTGCTGCTGCTGCTGCTGGGGGGGTTGGTTTGGAGACGACGG
1423	ACCACGTCTCACACCGCTGCTGCTGCTGCTGCTGGAGTTTTAGAGCTAGAAATAGCAAGTTAAAATAAGGCTAGTCCGTTATCAACTTGAAAAACTGGCACCGAGTCGGTGCTTTTTTACATGCGGACCTGCTGCTGCTGCTGCTGTCTGGCATGGTTTGGAGACGACGG
1425	ACCACGTCTCACACCGCTGCTGCTGCTGCTGCTGGAGTTTTAGAGCTAGAAATAGCAAGTTAAAATAAGGCTAGTCCGTTATCAACTTGAAAAACTGGCACCGAGTCGGTGCTTTTTTACATGCTCACCTGCTGCTGCTGCTGCTGTGAGGCCACGTTTGGAGACGACGG
1427	ACCACGTCTCACACCGCTGCTGCTGCTGCTGCTGGAGTTTTAGAGCTAGAAATAGCAAGTTAAAATAAGGCTAGTCCGTTATCAACTTGAAAAACTGGCACCGAGTCGGTGCTTTTTTACATGGCAACCTGCTGCTGCTGCTGCTTCTGGGGACAGTTTGGAGACGACGG
1428	ACCACGTCTCACACCGCTGCTGCTGCTGCTGCTGGAGTTTTAGAGCTAGAAATAGCAAGTTAAAATAAGGCTAGTCCGTTATCAACTTGAAAAACTGGCACCGAGTCGGTGCTTTTTTACATGTCGACAGGCTGCGGCTGTTGCTGGAGGGGGGAGTTTGGAGACGACGG
1434	ACCACGTCTCACACCGCTGCTGCTGCTGCTGCTGGAGTTTTAGAGCTAGAAATAGCAAGTTAAAATAAGGCTAGTCCGTTATCAACTTGAAAAACTGGCACCGAGTCGGTGCTTTTTTACATTGTCACATGCTGCTGCTGCTGGTTCAGGGACCAGTTTGGAGACGACGG
1438	ACCACGTCTCACACCGCTGCTGCTGCTGCTGCTGGAGTTTTAGAGCTAGAAATAGCAAGTTAAAATAAGGCTAGTCCGTTATCAACTTGAAAAACTGGCACCGAGTCGGTGCTTTTTTACCACGCTACCAGTTGCTGCTGATGCTAGAAGGACTAGTTTGGAGACGACGG
1440	ACCACGTCTCACACCGCTGCTGCTGCTGCTGCTGGAGTTTTAGAGCTAGAAATAGCAAGTTAAAATAAGGCTAGTCCGTTATCAACTTGAAAAACTGGCACCGAGTCGGTGCTTTTTTACCACGTGACCATCTGCAGCTGCTGCTGGAAGGGCAGGTTTGGAGACGACGG
1442	ACCACGTCTCACACCGCTGCTGCTGCTGCTGCTGGAGTTTTAGAGCTAGAAATAGCAAGTTAAAATAAGGCTAGTCCGTTATCAACTTGAAAAACTGGCACCGAGTCGGTGCTTTTTTACCAGCTCACCCGCTGCTGCTGCTGCTGCTGGGGGCCGTTTGGAGACGACGG
1453	ACCACGTCTCACACCGCTGCTGCTGCTGCTGCTGGAGTTTTAGAGCTAGAAATAGCAAGTTAAAATAAGGCTAGTCCGTTATCAACTTGAAAAACTGGCACCGAGTCGGTGCTTTTTTACCGTCGAACCTGCTGCAGCAGCTGCTCCATGGCCAGGTTTGGAGACGACGG
1459	ACCACGTCTCACACCGCTGCTGCTGCTGCTGCTGGAGTTTTAGAGCTAGAAATAGCAAGTTAAAATAAGGCTAGTCCGTTATCAACTTGAAAAACTGGCACCGAGTCGGTGCTTTTTTACCTAACCACCTGCTGCGGCTGCAGGTGTAGGGAGCGGTTTGGAGACGACGG
1463	ACCACGTCTCACACCGCTGCTGCTGCTGCTGCTGGAGTTTTAGAGCTAGAAATAGCAAGTTAAAATAAGGCTAGTCCGTTATCAACTTGAAAAACTGGCACCGAGTCGGTGCTTTTTTACCTCACGACCTGCTGCTGCAGTGGTTGGATGGGGCAGTTTGGAGACGACGG
1465	ACCACGTCTCACACCGCTGCTGCTGCTGCTGCTGGAGTTTTAGAGCTAGAAATAGCAAGTTAAAATAAGGCTAGTCCGTTATCAACTTGAAAAACTGGCACCGAGTCGGTGCTTTTTTACCTCATCACCTGCTGCTGCCCCTGCTGTGGGGGGGTGTTTGGAGACGACGG
1473	ACCACGTCTCACACCGCTGCTGCTGCTGCTGCTGGAGTTTTAGAGCTAGAAATAGCAAGTTAAAATAAGGCTAGTCCGTTATCAACTTGAAAAACTGGCACCGAGTCGGTGCTTTTTTACCTTATCACCTGCTGCTGCTGCTGCTCCTCGGGGGCGTTTGGAGACGACGG
1476	ACCACGTCTCACACCGCTGCTGCTGCTGCTGCTGGAGTTTTAGAGCTAGAAATAGCAAGTTAAAATAAGGCTAGTCCGTTATCAACTTGAAAAACTGGCACCGAGTCGGTGCTTTTTTACCTTCATACCTGCTGCTGCTGCTGCTCTGTGGCTGTGTTTGGAGACGACGG
1498	ACCACGTCTCACACCGCTGCTGCTGCTGCTGCTGGAGTTTTAGAGCTAGAAATAGCAAGTTAAAATAAGGCTAGTCCGTTATCAACTTGAAAAACTGGCACCGAGTCGGTGCTTTTTTACGAAGACACCTGCTGCTGCTGCTGCTGGCGGGGCGCGTTTGGAGACGACGG
1501	ACCACGTCTCACACCGCTGCTGCTGCTGCTGCTGGAGTTTTAGAGCTAGAAATAGCAAGTTAAAATAAGGCTAGTCCGTTATCAACTTGAAAAACTGGCACCGAGTCGGTGCTTTTTTACGAAGCCACCTGCTGCTGCTGCTGCTGGTGGGGCTGGTTTGGAGACGACGG
1504	ACCACGTCTCACACCGCTGCTGCTGCTGCTGCTGGAGTTTTAGAGCTAGAAATAGCAAGTTAAAATAAGGCTAGTCCGTTATCAACTTGAAAAACTGGCACCGAGTCGGTGCTTTTTTACGAAGTCACCTGCTGCTGCTGCTGCTGTGTGGACTGGTTTGGAGACGACGG
1508	ACCACGTCTCACACCGCTGCTGCTGCTGCTGCTGGAGTTTTAGAGCTAGAAATAGCAAGTTAAAATAAGGCTAGTCCGTTATCAACTTGAAAAACTGGCACCGAGTCGGTGCTTTTTTAATTGAAGACAAGCTGCTGCTGCTGCTGGCTGGAAGCGTTTGGAGACGACGG
1509	ACCACGTCTCACACCGCTGCTGCTGCTGCTGCTGGAGTTTTAGAGCTAGAAATAGCAAGTTAAAATAAGGCTAGTCCGTTATCAACTTGAAAAACTGGCACCGAGTCGGTGCTTTTTTAATTGAATACAAGCTGCTGCTGCTGGGGGATGGAGGGGTTTGGAGACGACGG
1510	ACCACGTCTCACACCGCTGCTGCTGCTGCTGCTGGAGTTTTAGAGCTAGAAATAGCAAGTTAAAATAAGGCTAGTCCGTTATCAACTTGAAAAACTGGCACCGAGTCGGTGCTTTTTTAATTGACAACAAGCTGCTGCTGCTGGTGGGTGGGGAAGTTTGGAGACGACGG
1511	ACCACGTCTCACACCGCTGCTGCTGCTGCTGCTGGAGTTTTAGAGCTAGAAATAGCAAGTTAAAATAAGGCTAGTCCGTTATCAACTTGAAAAACTGGCACCGAGTCGGTGCTTTTTTAATTGACCACAGGCTGCTGCTGATGGTGGATGGGGATGTTTGGAGACGACGG
1513	ACCACGTCTCACACCGCTGCTGCTGCTGCTGCTGGAGTTTTAGAGCTAGAAATAGCAAGTTAAAATAAGGCTAGTCCGTTATCAACTTGAAAAACTGGCACCGAGTCGGTGCTTTTTTAATTGAGTACATGATGCTGATGCTGCTGGCTGGGGACGTTTGGAGACGACGG
1514	ACCACGTCTCACACCGCTGCTGCTGCTGCTGCTGGAGTTTTAGAGCTAGAAATAGCAAGTTAAAATAAGGCTAGTCCGTTATCAACTTGAAAAACTGGCACCGAGTCGGTGCTTTTTTAATTGATGACATGCGGCTGCTGATGGTGGAGGGAGAAGTTTGGAGACGACGG
1515	ACCACGTCTCACACCGCTGCTGCTGCTGCTGCTGGAGTTTTAGAGCTAGAAATAGCAAGTTAAAATAAGGCTAGTCCGTTATCAACTTGAAAAACTGGCACCGAGTCGGTGCTTTTTTAATTGCATACATGCTGATGCTGCTGCTCCAGGGCCCAGTTTGGAGACGACGG
1516	ACCACGTCTCACACCGCTGCTGCTGCTGCTGCTGGAGTTTTAGAGCTAGAAATAGCAAGTTAAAATAAGGCTAGTCCGTTATCAACTTGAAAAACTGGCACCGAGTCGGTGCTTTTTTAATTGCGAACATGCTGATGCTGCTGGTGCATGGACCAGTTTGGAGACGACGG
1517	ACCACGTCTCACACCGCTGCTGCTGCTGCTGCTGGAGTTTTAGAGCTAGAAATAGCAAGTTAAAATAAGGCTAGTCCGTTATCAACTTGAAAAACTGGCACCGAGTCGGTGCTTTTTTAATTGCTGACATGCTGCTGATGCTGTCGGAGGGGGGGGTTTGGAGACGACGG
1518	ACCACGTCTCACACCGCTGCTGCTGCTGCTGCTGGAGTTTTAGAGCTAGAAATAGCAAGTTAAAATAAGGCTAGTCCGTTATCAACTTGAAAAACTGGCACCGAGTCGGTGCTTTTTTAATTGGACACATGCTGCTGCAGCTGCTGGAAGGCGTGGTTTGGAGACGACGG
1519	ACCACGTCTCACACCGCTGCTGCTGCTGCTGCTGGAGTTTTAGAGCTAGAAATAGCAAGTTAAAATAAGGCTAGTCCGTTATCAACTTGAAAAACTGGCACCGAGTCGGTGCTTTTTTAATTGGATACATGCTGCTGCCGCTGGTGCAGGGGCCAGTTTGGAGACGACGG
1520	ACCACGTCTCACACCGCTGCTGCTGCTGCTGCTGGAGTTTTAGAGCTAGAAATAGCAAGTTAAAATAAGGCTAGTCCGTTATCAACTTGAAAAACTGGCACCGAGTCGGTGCTTTTTTAATTGGTAACATGCTGCTGCTGCAGCTCCAGGGCCCAGTTTGGAGACGACGG
1523	ACCACGTCTCACACCGCTGCTGCTGCTGCTGCTGGAGTTTTAGAGCTAGAAATAGCAAGTTAAAATAAGGCTAGTCCGTTATCAACTTGAAAAACTGGCACCGAGTCGGTGCTTTTTTAATTGTGTACATGCTGCTGCTGCTGCTGCTGGGGCTGGTTTGGAGACGACGG
1524	ACCACGTCTCACACCGCTGCTGCTGCTGCTGCTGGAGTTTTAGAGCTAGAAATAGCAAGTTAAAATAAGGCTAGTCCGTTATCAACTTGAAAAACTGGCACCGAGTCGGTGCTTTTTTACAACAACACATGCTGCTGCTGCTGGGGGATGGGTGAGTTTGGAGACGACGG
1525	ACCACGTCTCACACCGCTGCTGCTGCTGCTGCTGGAGTTTTAGAGCTAGAAATAGCAAGTTAAAATAAGGCTAGTCCGTTATCAACTTGAAAAACTGGCACCGAGTCGGTGCTTTTTTACAACACCACATGCTGCTGCTGCTGGTGCAAGGAACAGTTTGGAGACGACGG
1526	ACCACGTCTCACACCGCTGCTGCTGCTGCTGCTGGAGTTTTAGAGCTAGAAATAGCAAGTTAAAATAAGGCTAGTCCGTTATCAACTTGAAAAACTGGCACCGAGTCGGTGCTTTTTTACAACACGACATGCTGCTGCTGCTGGTGGGTGGAGCAGTTTGGAGACGACGG
1527	ACCACGTCTCACACCGCTGCTGCTGCTGCTGCTGGAGTTTTAGAGCTAGAAATAGCAAGTTAAAATAAGGCTAGTCCGTTATCAACTTGAAAAACTGGCACCGAGTCGGTGCTTTTTTACAACACTACATGCTGCTGCTGCTGTTCCAAGGACCAGTTTGGAGACGACGG
1528	ACCACGTCTCACACCGCTGCTGCTGCTGCTGCTGGAGTTTTAGAGCTAGAAATAGCAAGTTAAAATAAGGCTAGTCCGTTATCAACTTGAAAAACTGGCACCGAGTCGGTGCTTTTTTACAACAGGACATGCTGCTGCTGCTGTTCTAGGGGCCAGTTTGGAGACGACGG
1529	ACCACGTCTCACACCGCTGCTGCTGCTGCTGCTGGAGTTTTAGAGCTAGAAATAGCAAGTTAAAATAAGGCTAGTCCGTTATCAACTTGAAAAACTGGCACCGAGTCGGTGCTTTTTTACAACATCACATGCTGCTGGTGCTGCAGGTGGGCACAGTTTGGAGACGACGG
1530	ACCACGTCTCACACCGCTGCTGCTGCTGCTGCTGGAGTTTTAGAGCTAGAAATAGCAAGTTAAAATAAGGCTAGTCCGTTATCAACTTGAAAAACTGGCACCGAGTCGGTGCTTTTTTACAACCGAACATGCTGCTGTGGCTGCTGCATGGAGAGGTTTGGAGACGACGG
1531	ACCACGTCTCACACCGCTGCTGCTGCTGCTGCTGGAGTTTTAGAGCTAGAAATAGCAAGTTAAAATAAGGCTAGTCCGTTATCAACTTGAAAAACTGGCACCGAGTCGGTGCTTTTTTACAACCGTACATGCTGCTGTTGCTGCTTTAGGGGCCAGTTTGGAGACGACGG
1532	ACCACGTCTCACACCGCTGCTGCTGCTGCTGCTGGAGTTTTAGAGCTAGAAATAGCAAGTTAAAATAAGGCTAGTCCGTTATCAACTTGAAAAACTGGCACCGAGTCGGTGCTTTTTTACAACCTTACATGCTGGTCCTGCTGCAGGAAGGCCCCGTTTGGAGACGACGG
1533	ACCACGTCTCACACCGCTGCTGCTGCTGCTGCTGGAGTTTTAGAGCTAGAAATAGCAAGTTAAAATAAGGCTAGTCCGTTATCAACTTGAAAAACTGGCACCGAGTCGGTGCTTTTTTACAACGACACATGCTGTGGCTGCTGGTGGAGGGGTCAGTTTGGAGACGACGG
1534	ACCACGTCTCACACCGCTGCTGCTGCTGCTGCTGGAGTTTTAGAGCTAGAAATAGCAAGTTAAAATAAGGCTAGTCCGTTATCAACTTGAAAAACTGGCACCGAGTCGGTGCTTTTTTACAACGCGACATGTTGCTGCTGCTGCTGGCAGGGACAGTTTGGAGACGACGG
1535	ACCACGTCTCACACCGCTGCTGCTGCTGCTGCTGGAGTTTTAGAGCTAGAAATAGCAAGTTAAAATAAGGCTAGTCCGTTATCAACTTGAAAAACTGGCACCGAGTCGGTGCTTTTTTACAACGGTACATTCTGCTGCTGATTCTGGAAGGGAAAGTTTGGAGACGACGG
1536	ACCACGTCTCACACCGCTGCTGCTGCTGCTGCTGGAGTTTTAGAGCTAGAAATAGCAAGTTAAAATAAGGCTAGTCCGTTATCAACTTGAAAAACTGGCACCGAGTCGGTGCTTTTTTACAACGTCACATTCTGCTGCTGTTGTTGGATGGAATGGTTTGGAGACGACGG
1537	ACCACGTCTCACACCGCTGCTGCTGCTGCTGCTGGAGTTTTAGAGCTAGAAATAGCAAGTTAAAATAAGGCTAGTCCGTTATCAACTTGAAAAACTGGCACCGAGTCGGTGCTTTTTTACAACTACACCACCGGCAGCTGCTGCTGGAGGGGCTGGTTTGGAGACGACGG
1538	ACCACGTCTCACACCGCTGCTGCTGCTGCTGCTGGAGTTTTAGAGCTAGAAATAGCAAGTTAAAATAAGGCTAGTCCGTTATCAACTTGAAAAACTGGCACCGAGTCGGTGCTTTTTTACAACTAGACCACCTGCTGCTGATGCTGGCGGGTGGAGTTTGGAGACGACGG
1539	ACCACGTCTCACACCGCTGCTGCTGCTGCTGCTGGAGTTTTAGAGCTAGAAATAGCAAGTTAAAATAAGGCTAGTCCGTTATCAACTTGAAAAACTGGCACCGAGTCGGTGCTTTTTTACAACTCAACCACCTGCTGCTGGTGCTGGAGGGAAGAGTTTGGAGACGACGG
1540	ACCACGTCTCACACCGCTGCTGCTGCTGCTGCTGGAGTTTTAGAGCTAGAAATAGCAAGTTAAAATAAGGCTAGTCCGTTATCAACTTGAAAAACTGGCACCGAGTCGGTGCTTTTTTACAACTCCACCAGAGGCTGCTGCTGCTGGGAGGGAGGGTTTGGAGACGACGG
1541	ACCACGTCTCACACCGCTGCTGCTGCTGCTGCTGGAGTTTTAGAGCTAGAAATAGCAAGTTAAAATAAGGCTAGTCCGTTATCAACTTGAAAAACTGGCACCGAGTCGGTGCTTTTTTACAACTCGACCAGATGCTGCTGTTGCTGGCAGGCCTCGTTTGGAGACGACGG
1542	ACCACGTCTCACACCGCTGCTGCTGCTGCTGCTGGAGTTTTAGAGCTAGAAATAGCAAGTTAAAATAAGGCTAGTCCGTTATCAACTTGAAAAACTGGCACCGAGTCGGTGCTTTTTTACAACTGGACCAGCAGCTGATGCTGCTGGTTGGAGAGGTTTGGAGACGACGG
1543	ACCACGTCTCACACCGCTGCTGCTGCTGCTGCTGGAGTTTTAGAGCTAGAAATAGCAAGTTAAAATAAGGCTAGTCCGTTATCAACTTGAAAAACTGGCACCGAGTCGGTGCTTTTTTACAACTGTACCAGCAGCTGCTGCTGGGGGAAGGGGTCGTTTGGAGACGACGG
1544	ACCACGTCTCACACCGCTGCTGCTGCTGCTGCTGGAGTTTTAGAGCTAGAAATAGCAAGTTAAAATAAGGCTAGTCCGTTATCAACTTGAAAAACTGGCACCGAGTCGGTGCTTTTTTACAACTTCACCAGCTATTGCTCCTGCTGGATGGTTATGTTTGGAGACGACGG
1545	ACCACGTCTCACACCGCTGCTGCTGCTGCTGCTGGAGTTTTAGAGCTAGAAATAGCAAGTTAAAATAAGGCTAGTCCGTTATCAACTTGAAAAACTGGCACCGAGTCGGTGCTTTTTTACAAGAAGACCAGCTGCAGCAGCTGCTGAAGGGCCAGGTTTGGAGACGACGG
1546	ACCACGTCTCACACCGCTGCTGCTGCTGCTGCTGGAGTTTTAGAGCTAGAAATAGCAAGTTAAAATAAGGCTAGTCCGTTATCAACTTGAAAAACTGGCACCGAGTCGGTGCTTTTTTACAAGATGACCAGCTGCCACTGCTGCTGCAGGGGCCAGTTTGGAGACGACGG
1547	ACCACGTCTCACACCGCTGCTGCTGCTGCTGCTGGAGTTTTAGAGCTAGAAATAGCAAGTTAAAATAAGGCTAGTCCGTTATCAACTTGAAAAACTGGCACCGAGTCGGTGCTTTTTTACAAGATTACCAGCTGCCGCTGCTGCCGGGAGGTGCCGTTTGGAGACGACGG
1548	ACCACGTCTCACACCGCTGCTGCTGCTGCTGCTGGAGTTTTAGAGCTAGAAATAGCAAGTTAAAATAAGGCTAGTCCGTTATCAACTTGAAAAACTGGCACCGAGTCGGTGCTTTTTTACAAGCTAACCAGCTGCTGCAGCAGCGGGATGGGTTTGTTTGGAGACGACGG
1549	ACCACGTCTCACACCGCTGCTGCTGCTGCTGCTGGAGTTTTAGAGCTAGAAATAGCAAGTTAAAATAAGGCTAGTCCGTTATCAACTTGAAAAACTGGCACCGAGTCGGTGCTTTTTTACAAGCTCACCAGCTGCTGCAGCTCCTGGAAGGGACGGTTTGGAGACGACGG
1550	ACCACGTCTCACACCGCTGCTGCTGCTGCTGCTGGAGTTTTAGAGCTAGAAATAGCAAGTTAAAATAAGGCTAGTCCGTTATCAACTTGAAAAACTGGCACCGAGTCGGTGCTTTTTTACAAGCTTACCAGCTGCTGCAGCTGCTGAAAGGCTTCGTTTGGAGACGACGG
1551	ACCACGTCTCACACCGCTGCTGCTGCTGCTGCTGGAGTTTTAGAGCTAGAAATAGCAAGTTAAAATAAGGCTAGTCCGTTATCAACTTGAAAAACTGGCACCGAGTCGGTGCTTTTTTACAAGGACACCAGCTGCTGCCGCTCCTGCACGGCAATGTTTGGAGACGACGG
1552	ACCACGTCTCACACCGCTGCTGCTGCTGCTGCTGGAGTTTTAGAGCTAGAAATAGCAAGTTAAAATAAGGCTAGTCCGTTATCAACTTGAAAAACTGGCACCGAGTCGGTGCTTTTTTACAAGGAGACCAGCTGCTGCCGCTGCCGCAGGGGCTTGTTTGGAGACGACGG
1553	ACCACGTCTCACACCGCTGCTGCTGCTGCTGCTGGAGTTTTAGAGCTAGAAATAGCAAGTTAAAATAAGGCTAGTCCGTTATCAACTTGAAAAACTGGCACCGAGTCGGTGCTTTTTTACAAGGATACCAGCTGCTGCCTCTGCAGGAAGGGATGGTTTGGAGACGACGG
1554	ACCACGTCTCACACCGCTGCTGCTGCTGCTGCTGGAGTTTTAGAGCTAGAAATAGCAAGTTAAAATAAGGCTAGTCCGTTATCAACTTGAAAAACTGGCACCGAGTCGGTGCTTTTTTACAAGGCAACCAGCTGCTGCTCCGGCTGTAAGGCCTGGTTTGGAGACGACGG
1555	ACCACGTCTCACACCGCTGCTGCTGCTGCTGCTGGAGTTTTAGAGCTAGAAATAGCAAGTTAAAATAAGGCTAGTCCGTTATCAACTTGAAAAACTGGCACCGAGTCGGTGCTTTTTTACAAGGCGACCAGCTGCTGCTCCTGATGTAGGGAAAGGTTTGGAGACGACGG
1556	ACCACGTCTCACACCGCTGCTGCTGCTGCTGCTGGAGTTTTAGAGCTAGAAATAGCAAGTTAAAATAAGGCTAGTCCGTTATCAACTTGAAAAACTGGCACCGAGTCGGTGCTTTTTTACAAGGTGACCAGCTGCTGCTGCTGCACCAGGGCAGCGTTTGGAGACGACGG
1557	ACCACGTCTCACACCGCTGCTGCTGCTGCTGCTGGAGTTTTAGAGCTAGAAATAGCAAGTTAAAATAAGGCTAGTCCGTTATCAACTTGAAAAACTGGCACCGAGTCGGTGCTTTTTTACAAGTCAACCAGCTGCTGCTGCTGGAAGAAGGCAGTGTTTGGAGACGACGG
1558	ACCACGTCTCACACCGCTGCTGCTGCTGCTGCTGGAGTTTTAGAGCTAGAAATAGCAAGTTAAAATAAGGCTAGTCCGTTATCAACTTGAAAAACTGGCACCGAGTCGGTGCTTTTTTACAAGTCTACCAGCTGCTGCTTCTGGTGGCAGGACCAGTTTGGAGACGACGG
1559	ACCACGTCTCACACCGCTGCTGCTGCTGCTGCTGGAGTTTTAGAGCTAGAAATAGCAAGTTAAAATAAGGCTAGTCCGTTATCAACTTGAAAAACTGGCACCGAGTCGGTGCTTTTTTACAAGTTGACCAGGTGCTGCTGCTGCTCCAAGGTCCTGTTTGGAGACGACGG
1560	ACCACGTCTCACACCGCTGCTGCTGCTGCTGCTGGAGTTTTAGAGCTAGAAATAGCAAGTTAAAATAAGGCTAGTCCGTTATCAACTTGAAAAACTGGCACCGAGTCGGTGCTTTTTTACAATACAACCAGGTGGTGCAGCTGCTGGAAGGAGCTGTTTGGAGACGACGG
1561	ACCACGTCTCACACCGCTGCTGCTGCTGCTGCTGGAGTTTTAGAGCTAGAAATAGCAAGTTAAAATAAGGCTAGTCCGTTATCAACTTGAAAAACTGGCACCGAGTCGGTGCTTTTTTACAATAGCACCATCTCCTGCTGCTGCTGCAGGGGCATGTTTGGAGACGACGG
1562	ACCACGTCTCACACCGCTGCTGCTGCTGCTGCTGGAGTTTTAGAGCTAGAAATAGCAAGTTAAAATAAGGCTAGTCCGTTATCAACTTGAAAAACTGGCACCGAGTCGGTGCTTTTTTACAATAGGACCATCTGCAGCTGCTCCTGGAAGGATGGGTTTGGAGACGACGG
1563	ACCACGTCTCACACCGCTGCTGCTGCTGCTGCTGGAGTTTTAGAGCTAGAAATAGCAAGTTAAAATAAGGCTAGTCCGTTATCAACTTGAAAAACTGGCACCGAGTCGGTGCTTTTTTACAATAGTACCATCTGCAGCTGCTGCTTGAAGGGAGGGTTTGGAGACGACGG
1564	ACCACGTCTCACACCGCTGCTGCTGCTGCTGCTGGAGTTTTAGAGCTAGAAATAGCAAGTTAAAATAAGGCTAGTCCGTTATCAACTTGAAAAACTGGCACCGAGTCGGTGCTTTTTTACAATATTACCATCTTCTGCTGCTGCAGGAGGGCTCCGTTTGGAGACGACGG
1565	ACCACGTCTCACACCGCTGCTGCTGCTGCTGCTGGAGTTTTAGAGCTAGAAATAGCAAGTTAAAATAAGGCTAGTCCGTTATCAACTTGAAAAACTGGCACCGAGTCGGTGCTTTTTTACAATCAGACCCACCGCTGCTGCTGCTGAAGGGAAGTGTTTGGAGACGACGG
1566	ACCACGTCTCACACCGCTGCTGCTGCTGCTGCTGGAGTTTTAGAGCTAGAAATAGCAAGTTAAAATAAGGCTAGTCCGTTATCAACTTGAAAAACTGGCACCGAGTCGGTGCTTTTTTACAATCCTACCCACTACTGCTGCTGCTGGCTGGAGAAGTTTGGAGACGACGG
1567	ACCACGTCTCACACCGCTGCTGCTGCTGCTGCTGGAGTTTTAGAGCTAGAAATAGCAAGTTAAAATAAGGCTAGTCCGTTATCAACTTGAAAAACTGGCACCGAGTCGGTGCTTTTTTACAATCGAACCCACTGCTGCTCCTGCTGGGTGGCCCAGTTTGGAGACGACGG
1568	ACCACGTCTCACACCGCTGCTGCTGCTGCTGCTGGAGTTTTAGAGCTAGAAATAGCAAGTTAAAATAAGGCTAGTCCGTTATCAACTTGAAAAACTGGCACCGAGTCGGTGCTTTTTTACAATCGGACCCCCTGCTGCCGCTGCAGGAGGGGGCTGTTTGGAGACGACGG
1569	ACCACGTCTCACACCGCTGCTGCTGCTGCTGCTGGAGTTTTAGAGCTAGAAATAGCAAGTTAAAATAAGGCTAGTCCGTTATCAACTTGAAAAACTGGCACCGAGTCGGTGCTTTTTTACAATCGTACCCCCTGCTGCTCCTGCTGCATGGCATCGTTTGGAGACGACGG
1570	ACCACGTCTCACACCGCTGCTGCTGCTGCTGCTGGAGTTTTAGAGCTAGAAATAGCAAGTTAAAATAAGGCTAGTCCGTTATCAACTTGAAAAACTGGCACCGAGTCGGTGCTTTTTTACAATCTGACCCCCTGCTTCTGCTGCTTGAGGGAGTGGTTTGGAGACGACGG
1571	ACCACGTCTCACACCGCTGCTGCTGCTGCTGCTGGAGTTTTAGAGCTAGAAATAGCAAGTTAAAATAAGGCTAGTCCGTTATCAACTTGAAAAACTGGCACCGAGTCGGTGCTTTTTTACAATGCAACCCGCTGCTGCTCCAGCAGGAGGGCTTGGTTTGGAGACGACGG
1572	ACCACGTCTCACACCGCTGCTGCTGCTGCTGCTGGAGTTTTAGAGCTAGAAATAGCAAGTTAAAATAAGGCTAGTCCGTTATCAACTTGAAAAACTGGCACCGAGTCGGTGCTTTTTTACAATGGAACCCGCTGCTGCTCTGGCTGGAGGGAGTGGTTTGGAGACGACGG
1573	ACCACGTCTCACACCGCTGCTGCTGCTGCTGCTGGAGTTTTAGAGCTAGAAATAGCAAGTTAAAATAAGGCTAGTCCGTTATCAACTTGAAAAACTGGCACCGAGTCGGTGCTTTTTTACAATGGCACCCGCTGCTGCTGCTGCCCGCCGGCTGCGTTTGGAGACGACGG
1574	ACCACGTCTCACACCGCTGCTGCTGCTGCTGCTGGAGTTTTAGAGCTAGAAATAGCAAGTTAAAATAAGGCTAGTCCGTTATCAACTTGAAAAACTGGCACCGAGTCGGTGCTTTTTTACAATGTGACCCGCTGCTGCTGCTGCTACTGGGCGCGGTTTGGAGACGACGG
1575	ACCACGTCTCACACCGCTGCTGCTGCTGCTGCTGGAGTTTTAGAGCTAGAAATAGCAAGTTAAAATAAGGCTAGTCCGTTATCAACTTGAAAAACTGGCACCGAGTCGGTGCTTTTTTACAATGTTACCCGCTGCTGCTGCTGCTCCGGGGCAGCGTTTGGAGACGACGG
1577	ACCACGTCTCACACCGCTGCTGCTGCTGCTGCTGGAGTTTTAGAGCTAGAAATAGCAAGTTAAAATAAGGCTAGTCCGTTATCAACTTGAAAAACTGGCACCGAGTCGGTGCTTTTTTACAATTCAACCCGCTGCTGCTGGTGCTGGAAGGCACGGTTTGGAGACGACGG
1578	ACCACGTCTCACACCGCTGCTGCTGCTGCTGCTGGAGTTTTAGAGCTAGAAATAGCAAGTTAAAATAAGGCTAGTCCGTTATCAACTTGAAAAACTGGCACCGAGTCGGTGCTTTTTTACAATTCCACCCGCTGCTGCTTCTGCTGGTTGGGGGTGTTTGGAGACGACGG
1579	ACCACGTCTCACACCGCTGCTGCTGCTGCTGCTGGAGTTTTAGAGCTAGAAATAGCAAGTTAAAATAAGGCTAGTCCGTTATCAACTTGAAAAACTGGCACCGAGTCGGTGCTTTTTTACAATTGCACCCGGGGCTGCTGCTGGTGGAAGGCAGGGTTTGGAGACGACGG
1580	ACCACGTCTCACACCGCTGCTGCTGCTGCTGCTGGAGTTTTAGAGCTAGAAATAGCAAGTTAAAATAAGGCTAGTCCGTTATCAACTTGAAAAACTGGCACCGAGTCGGTGCTTTTTTACACAACGACCCTCTGCTGCTTATGCTGGAGGGGAGGGTTTGGAGACGACGG
1581	ACCACGTCTCACACCGCTGCTGCTGCTGCTGCTGGAGTTTTAGAGCTAGAAATAGCAAGTTAAAATAAGGCTAGTCCGTTATCAACTTGAAAAACTGGCACCGAGTCGGTGCTTTTTTACACAAGTACCGCCTGCTGCTGCTGCGGGGAGGGCATGTTTGGAGACGACGG
1582	ACCACGTCTCACACCGCTGCTGCTGCTGCTGCTGGAGTTTTAGAGCTAGAAATAGCAAGTTAAAATAAGGCTAGTCCGTTATCAACTTGAAAAACTGGCACCGAGTCGGTGCTTTTTTACACAATCACCGGCAGCTGCGGATGCTGGAAGGTGAGGTTTGGAGACGACGG
1583	ACCACGTCTCACACCGCTGCTGCTGCTGCTGCTGGAGTTTTAGAGCTAGAAATAGCAAGTTAAAATAAGGCTAGTCCGTTATCAACTTGAAAAACTGGCACCGAGTCGGTGCTTTTTTACACAATGACCGGCCGCTGCTACTGGTGGACGGGGCCGTTTGGAGACGACGG
1584	ACCACGTCTCACACCGCTGCTGCTGCTGCTGCTGGAGTTTTAGAGCTAGAAATAGCAAGTTAAAATAAGGCTAGTCCGTTATCAACTTGAAAAACTGGCACCGAGTCGGTGCTTTTTTACACAATTACCGGCGGCGGCTGCTGCTGGACGGAGCTGTTTGGAGACGACGG
1585	ACCACGTCTCACACCGCTGCTGCTGCTGCTGCTGGAGTTTTAGAGCTAGAAATAGCAAGTTAAAATAAGGCTAGTCCGTTATCAACTTGAAAAACTGGCACCGAGTCGGTGCTTTTTTACACACACACCGGCGGCTGCTGCTGCTGCTGGGGTTGGTTTGGAGACGACGG
1586	ACCACGTCTCACACCGCTGCTGCTGCTGCTGCTGGAGTTTTAGAGCTAGAAATAGCAAGTTAAAATAAGGCTAGTCCGTTATCAACTTGAAAAACTGGCACCGAGTCGGTGCTTTTTTACACACATACCGGCTGCAGCTGTTCCTGGAAGGGCGAGTTTGGAGACGACGG
1587	ACCACGTCTCACACCGCTGCTGCTGCTGCTGCTGGAGTTTTAGAGCTAGAAATAGCAAGTTAAAATAAGGCTAGTCCGTTATCAACTTGAAAAACTGGCACCGAGTCGGTGCTTTTTTACACACCAACCGGCTGCTGCAGCTGCTGCCTGGTGAGGTTTGGAGACGACGG
1588	ACCACGTCTCACACCGCTGCTGCTGCTGCTGCTGGAGTTTTAGAGCTAGAAATAGCAAGTTAAAATAAGGCTAGTCCGTTATCAACTTGAAAAACTGGCACCGAGTCGGTGCTTTTTTACACACCGACCGGCTGCTGCAGCTGCTGGCCGGCGCTGTTTGGAGACGACGG
1589	ACCACGTCTCACACCGCTGCTGCTGCTGCTGCTGGAGTTTTAGAGCTAGAAATAGCAAGTTAAAATAAGGCTAGTCCGTTATCAACTTGAAAAACTGGCACCGAGTCGGTGCTTTTTTACACACCTACCGGCTGCTGCCGCATCTGGACGGACAAGTTTGGAGACGACGG
1590	ACCACGTCTCACACCGCTGCTGCTGCTGCTGCTGGAGTTTTAGAGCTAGAAATAGCAAGTTAAAATAAGGCTAGTCCGTTATCAACTTGAAAAACTGGCACCGAGTCGGTGCTTTTTTACACACGAACCGGCTGCTGCTGCTCTCGGAGGGGAGCGTTTGGAGACGACGG
1591	ACCACGTCTCACACCGCTGCTGCTGCTGCTGCTGGAGTTTTAGAGCTAGAAATAGCAAGTTAAAATAAGGCTAGTCCGTTATCAACTTGAAAAACTGGCACCGAGTCGGTGCTTTTTTACACACGCACCGGGGGCTGCTGCTGCTGGCGGGGGTGGTTTGGAGACGACGG
1592	ACCACGTCTCACACCGCTGCTGCTGCTGCTGCTGGAGTTTTAGAGCTAGAAATAGCAAGTTAAAATAAGGCTAGTCCGTTATCAACTTGAAAAACTGGCACCGAGTCGGTGCTTTTTTACACACGGACCGGGTGCTGCTGCTGGTGGGCGGCCCCGTTTGGAGACGACGG
1593	ACCACGTCTCACACCGCTGCTGCTGCTGCTGCTGGAGTTTTAGAGCTAGAAATAGCAAGTTAAAATAAGGCTAGTCCGTTATCAACTTGAAAAACTGGCACCGAGTCGGTGCTTTTTTACACACTAACCTACAGCTGCTCCTACTGGATGGAATGGTTTGGAGACGACGG
1594	ACCACGTCTCACACCGCTGCTGCTGCTGCTGCTGGAGTTTTAGAGCTAGAAATAGCAAGTTAAAATAAGGCTAGTCCGTTATCAACTTGAAAAACTGGCACCGAGTCGGTGCTTTTTTACACACTGACCTACTACTGCTGCTGCTGCTAGGCTCAGTTTGGAGACGACGG
1595	ACCACGTCTCACACCGCTGCTGCTGCTGCTGCTGGAGTTTTAGAGCTAGAAATAGCAAGTTAAAATAAGGCTAGTCCGTTATCAACTTGAAAAACTGGCACCGAGTCGGTGCTTTTTTACACACTTACCTACTCCTGTTTCTGCTGGATGGCTCGGTTTGGAGACGACGG
1596	ACCACGTCTCACACCGCTGCTGCTGCTGCTGCTGGAGTTTTAGAGCTAGAAATAGCAAGTTAAAATAAGGCTAGTCCGTTATCAACTTGAAAAACTGGCACCGAGTCGGTGCTTTTTTACACAGTCACCTACTGCTGCTGCCGCTGCCGGGGCCCGTTTGGAGACGACGG
1597	ACCACGTCTCACACCGCTGCTGCTGCTGCTGCTGGAGTTTTAGAGCTAGAAATAGCAAGTTAAAATAAGGCTAGTCCGTTATCAACTTGAAAAACTGGCACCGAGTCGGTGCTTTTTTACACAGTTACCTACTGCTGCTGCTACTGCCTGGAAAAGTTTGGAGACGACGG
1598	ACCACGTCTCACACCGCTGCTGCTGCTGCTGCTGGAGTTTTAGAGCTAGAAATAGCAAGTTAAAATAAGGCTAGTCCGTTATCAACTTGAAAAACTGGCACCGAGTCGGTGCTTTTTTACACATAGACCTACTGCTGCTGCTGCTGCTGGGACGCGTTTGGAGACGACGG
1599	ACCACGTCTCACACCGCTGCTGCTGCTGCTGCTGGAGTTTTAGAGCTAGAAATAGCAAGTTAAAATAAGGCTAGTCCGTTATCAACTTGAAAAACTGGCACCGAGTCGGTGCTTTTTTACACATTGACCTACTGCTGTTGCTGCTGCTCGGTGAGGTTTGGAGACGACGG
1600	ACCACGTCTCACACCGCTGCTGCTGCTGCTGCTGGAGTTTTAGAGCTAGAAATAGCAAGTTAAAATAAGGCTAGTCCGTTATCAACTTGAAAAACTGGCACCGAGTCGGTGCTTTTTTACACCAGCACCTCATGCTGCAGCTGGTGGATGGGGATGTTTGGAGACGACGG
1601	ACCACGTCTCACACCGCTGCTGCTGCTGCTGCTGGAGTTTTAGAGCTAGAAATAGCAAGTTAAAATAAGGCTAGTCCGTTATCAACTTGAAAAACTGGCACCGAGTCGGTGCTTTTTTACACCATGACCTCCGGCGGCTGCTGGTGGATGGGTGGGTTTGGAGACGACGG
1602	ACCACGTCTCACACCGCTGCTGCTGCTGCTGCTGGAGTTTTAGAGCTAGAAATAGCAAGTTAAAATAAGGCTAGTCCGTTATCAACTTGAAAAACTGGCACCGAGTCGGTGCTTTTTTACACCGATACCTCCTCCTGGTGCTGCTGGAAGGTCACGTTTGGAGACGACGG
1603	ACCACGTCTCACACCGCTGCTGCTGCTGCTGCTGGAGTTTTAGAGCTAGAAATAGCAAGTTAAAATAAGGCTAGTCCGTTATCAACTTGAAAAACTGGCACCGAGTCGGTGCTTTTTTACACCGCCACCTCCTCCTTCTGCTGCTGCAGGGTGATGTTTGGAGACGACGG
1604	ACCACGTCTCACACCGCTGCTGCTGCTGCTGCTGGAGTTTTAGAGCTAGAAATAGCAAGTTAAAATAAGGCTAGTCCGTTATCAACTTGAAAAACTGGCACCGAGTCGGTGCTTTTTTACACCGCTACCTCCTGCCGCTGATGCTGAAGGGAAACGTTTGGAGACGACGG
1605	ACCACGTCTCACACCGCTGCTGCTGCTGCTGCTGGAGTTTTAGAGCTAGAAATAGCAAGTTAAAATAAGGCTAGTCCGTTATCAACTTGAAAAACTGGCACCGAGTCGGTGCTTTTTTACACCGGCACCTCCTGCTACTGCTGCTCTAAGGAGTAGTTTGGAGACGACGG
1606	ACCACGTCTCACACCGCTGCTGCTGCTGCTGCTGGAGTTTTAGAGCTAGAAATAGCAAGTTAAAATAAGGCTAGTCCGTTATCAACTTGAAAAACTGGCACCGAGTCGGTGCTTTTTTACACCGGTACCTCCTGCTACTTCTGCTGCAAGGGGTTGTTTGGAGACGACGG
1607	ACCACGTCTCACACCGCTGCTGCTGCTGCTGCTGGAGTTTTAGAGCTAGAAATAGCAAGTTAAAATAAGGCTAGTCCGTTATCAACTTGAAAAACTGGCACCGAGTCGGTGCTTTTTTACACCGTAACCTCCTGCTCCAGCTGCAGGAAGGACTGGTTTGGAGACGACGG
1608	ACCACGTCTCACACCGCTGCTGCTGCTGCTGCTGGAGTTTTAGAGCTAGAAATAGCAAGTTAAAATAAGGCTAGTCCGTTATCAACTTGAAAAACTGGCACCGAGTCGGTGCTTTTTTACACCGTGACCTCCTGCTGCAGCAGCTGCAAGGTCTGGTTTGGAGACGACGG
1609	ACCACGTCTCACACCGCTGCTGCTGCTGCTGCTGGAGTTTTAGAGCTAGAAATAGCAAGTTAAAATAAGGCTAGTCCGTTATCAACTTGAAAAACTGGCACCGAGTCGGTGCTTTTTTACACCGTTACCTCCTGCTGCTCATGGTGGATGGGAGGGTTTGGAGACGACGG
1610	ACCACGTCTCACACCGCTGCTGCTGCTGCTGCTGGAGTTTTAGAGCTAGAAATAGCAAGTTAAAATAAGGCTAGTCCGTTATCAACTTGAAAAACTGGCACCGAGTCGGTGCTTTTTTACACCTAGACCTCCTGCTGCTCCTGCTGCAGGGCCTGGTTTGGAGACGACGG
1611	ACCACGTCTCACACCGCTGCTGCTGCTGCTGCTGGAGTTTTAGAGCTAGAAATAGCAAGTTAAAATAAGGCTAGTCCGTTATCAACTTGAAAAACTGGCACCGAGTCGGTGCTTTTTTACACCTCAACCTCCTGCTGCTGCTCCAGGGAGGTAAGGTTTGGAGACGACGG
1612	ACCACGTCTCACACCGCTGCTGCTGCTGCTGCTGGAGTTTTAGAGCTAGAAATAGCAAGTTAAAATAAGGCTAGTCCGTTATCAACTTGAAAAACTGGCACCGAGTCGGTGCTTTTTTACACCTCGACCTCCTGCTGCTGCTCCTGGGGGGCCCCGTTTGGAGACGACGG
1613	ACCACGTCTCACACCGCTGCTGCTGCTGCTGCTGGAGTTTTAGAGCTAGAAATAGCAAGTTAAAATAAGGCTAGTCCGTTATCAACTTGAAAAACTGGCACCGAGTCGGTGCTTTTTTACACCTCTACCTCCTGCTGCTGCTCCTGTGTGGGTGGGTTTGGAGACGACGG
1614	ACCACGTCTCACACCGCTGCTGCTGCTGCTGCTGGAGTTTTAGAGCTAGAAATAGCAAGTTAAAATAAGGCTAGTCCGTTATCAACTTGAAAAACTGGCACCGAGTCGGTGCTTTTTTACACCTGAACCTCCTGCTGCTGCTGAGAGAAGGCTGGGTTTGGAGACGACGG
1615	ACCACGTCTCACACCGCTGCTGCTGCTGCTGCTGGAGTTTTAGAGCTAGAAATAGCAAGTTAAAATAAGGCTAGTCCGTTATCAACTTGAAAAACTGGCACCGAGTCGGTGCTTTTTTACACCTTAACCTCCTGCTGCTGCTGCAGAGGGGCCTGGTTTGGAGACGACGG
1616	ACCACGTCTCACACCGCTGCTGCTGCTGCTGCTGGAGTTTTAGAGCTAGAAATAGCAAGTTAAAATAAGGCTAGTCCGTTATCAACTTGAAAAACTGGCACCGAGTCGGTGCTTTTTTACACCTTGACCTCCTGCTGCTGCTGCTCTCCGGGGCCGTTTGGAGACGACGG
1617	ACCACGTCTCACACCGCTGCTGCTGCTGCTGCTGGAGTTTTAGAGCTAGAAATAGCAAGTTAAAATAAGGCTAGTCCGTTATCAACTTGAAAAACTGGCACCGAGTCGGTGCTTTTTTACACGAATACCTCCTGCTGCTGCTGCTGGCTGGGGTAGTTTGGAGACGACGG
1618	ACCACGTCTCACACCGCTGCTGCTGCTGCTGCTGGAGTTTTAGAGCTAGAAATAGCAAGTTAAAATAAGGCTAGTCCGTTATCAACTTGAAAAACTGGCACCGAGTCGGTGCTTTTTTACACGACGACCTCCTGCTGGTGGTGCTTGACGGGGCAGTTTGGAGACGACGG
1619	ACCACGTCTCACACCGCTGCTGCTGCTGCTGCTGGAGTTTTAGAGCTAGAAATAGCAAGTTAAAATAAGGCTAGTCCGTTATCAACTTGAAAAACTGGCACCGAGTCGGTGCTTTTTTACACGAGAACCTCCTGCTTCTGCTGCTGGTGGGGCTCGTTTGGAGACGACGG
1620	ACCACGTCTCACACCGCTGCTGCTGCTGCTGCTGGAGTTTTAGAGCTAGAAATAGCAAGTTAAAATAAGGCTAGTCCGTTATCAACTTGAAAAACTGGCACCGAGTCGGTGCTTTTTTACACGATAACCTCCTTCTGCTGCAGCTGCAAGGCTAGGTTTGGAGACGACGG
1621	ACCACGTCTCACACCGCTGCTGCTGCTGCTGCTGGAGTTTTAGAGCTAGAAATAGCAAGTTAAAATAAGGCTAGTCCGTTATCAACTTGAAAAACTGGCACCGAGTCGGTGCTTTTTTACACGATCACCTCGTGCTGGTGCTGCCGGAGGGAGGCGTTTGGAGACGACGG
1622	ACCACGTCTCACACCGCTGCTGCTGCTGCTGCTGGAGTTTTAGAGCTAGAAATAGCAAGTTAAAATAAGGCTAGTCCGTTATCAACTTGAAAAACTGGCACCGAGTCGGTGCTTTTTTACACGATTACCTCTCGCTGCTGCTGCTGGAGGGCTGGGTTTGGAGACGACGG
1623	ACCACGTCTCACACCGCTGCTGCTGCTGCTGCTGGAGTTTTAGAGCTAGAAATAGCAAGTTAAAATAAGGCTAGTCCGTTATCAACTTGAAAAACTGGCACCGAGTCGGTGCTTTTTTACACGCCTACCTGAAGCTGAGGCTGCTGGAAGGAAAGGTTTGGAGACGACGG
1624	ACCACGTCTCACACCGCTGCTGCTGCTGCTGCTGGAGTTTTAGAGCTAGAAATAGCAAGTTAAAATAAGGCTAGTCCGTTATCAACTTGAAAAACTGGCACCGAGTCGGTGCTTTTTTACACGCGAACCTGAATCTGCTGTTGCTGGAAGGACAGGTTTGGAGACGACGG
1625	ACCACGTCTCACACCGCTGCTGCTGCTGCTGCTGGAGTTTTAGAGCTAGAAATAGCAAGTTAAAATAAGGCTAGTCCGTTATCAACTTGAAAAACTGGCACCGAGTCGGTGCTTTTTTACACGCGTACCTGAGGCTGCAGCTGCTGCAGGGAGCCGTTTGGAGACGACGG
1626	ACCACGTCTCACACCGCTGCTGCTGCTGCTGCTGGAGTTTTAGAGCTAGAAATAGCAAGTTAAAATAAGGCTAGTCCGTTATCAACTTGAAAAACTGGCACCGAGTCGGTGCTTTTTTACACGCTAACCTGAGGCTGCTGCTGCAGGGAGGAGCTGTTTGGAGACGACGG
1627	ACCACGTCTCACACCGCTGCTGCTGCTGCTGCTGGAGTTTTAGAGCTAGAAATAGCAAGTTAAAATAAGGCTAGTCCGTTATCAACTTGAAAAACTGGCACCGAGTCGGTGCTTTTTTACACGGAGACCTGAGGCTGCTGTAGCTGGAAGGAAGTGTTTGGAGACGACGG
1628	ACCACGTCTCACACCGCTGCTGCTGCTGCTGCTGGAGTTTTAGAGCTAGAAATAGCAAGTTAAAATAAGGCTAGTCCGTTATCAACTTGAAAAACTGGCACCGAGTCGGTGCTTTTTTACACGGCAACCTGATGATGTTGCTGCTGCAGGGACCAGTTTGGAGACGACGG
1629	ACCACGTCTCACACCGCTGCTGCTGCTGCTGCTGGAGTTTTAGAGCTAGAAATAGCAAGTTAAAATAAGGCTAGTCCGTTATCAACTTGAAAAACTGGCACCGAGTCGGTGCTTTTTTACACGGCTACCTGATGCTGATGCTGCTGATGGGTGCGGTTTGGAGACGACGG
1630	ACCACGTCTCACACCGCTGCTGCTGCTGCTGCTGGAGTTTTAGAGCTAGAAATAGCAAGTTAAAATAAGGCTAGTCCGTTATCAACTTGAAAAACTGGCACCGAGTCGGTGCTTTTTTACACGGTTACCTGATGCTGGGGCTGATGGAAGGGAAAGTTTGGAGACGACGG
1631	ACCACGTCTCACACCGCTGCTGCTGCTGCTGCTGGAGTTTTAGAGCTAGAAATAGCAAGTTAAAATAAGGCTAGTCCGTTATCAACTTGAAAAACTGGCACCGAGTCGGTGCTTTTTTACACGTCCACCTGCAACTCCTGCCGCTGGAGGGCCTGGTTTGGAGACGACGG
1632	ACCACGTCTCACACCGCTGCTGCTGCTGCTGCTGGAGTTTTAGAGCTAGAAATAGCAAGTTAAAATAAGGCTAGTCCGTTATCAACTTGAAAAACTGGCACCGAGTCGGTGCTTTTTTACACGTGAACCTGCACCTGCTGCTGCTGTATGGGCTGGTTTGGAGACGACGG
1633	ACCACGTCTCACACCGCTGCTGCTGCTGCTGCTGGAGTTTTAGAGCTAGAAATAGCAAGTTAAAATAAGGCTAGTCCGTTATCAACTTGAAAAACTGGCACCGAGTCGGTGCTTTTTTACACGTGTACCTGCAGCAGCTGCTGCTCCATGGCATCGTTTGGAGACGACGG
1634	ACCACGTCTCACACCGCTGCTGCTGCTGCTGCTGGAGTTTTAGAGCTAGAAATAGCAAGTTAAAATAAGGCTAGTCCGTTATCAACTTGAAAAACTGGCACCGAGTCGGTGCTTTTTTACACGTTAACCTGCAGCAGCTGCTGCTGAAAGGATTCGTTTGGAGACGACGG
1635	ACCACGTCTCACACCGCTGCTGCTGCTGCTGCTGGAGTTTTAGAGCTAGAAATAGCAAGTTAAAATAAGGCTAGTCCGTTATCAACTTGAAAAACTGGCACCGAGTCGGTGCTTTTTTACACTAACACCTGCAGCAGCTGCTGTTGGTAGGAAGGGTTTGGAGACGACGG
1636	ACCACGTCTCACACCGCTGCTGCTGCTGCTGCTGGAGTTTTAGAGCTAGAAATAGCAAGTTAAAATAAGGCTAGTCCGTTATCAACTTGAAAAACTGGCACCGAGTCGGTGCTTTTTTACACTAAGACCTGCAGCTCCTGCTGCTGCTGGGCCATGTTTGGAGACGACGG
1637	ACCACGTCTCACACCGCTGCTGCTGCTGCTGCTGGAGTTTTAGAGCTAGAAATAGCAAGTTAAAATAAGGCTAGTCCGTTATCAACTTGAAAAACTGGCACCGAGTCGGTGCTTTTTTACACTACCACCTGCAGCTGCCGCTGCTGCCAGGACTTGTTTGGAGACGACGG
1638	ACCACGTCTCACACCGCTGCTGCTGCTGCTGCTGGAGTTTTAGAGCTAGAAATAGCAAGTTAAAATAAGGCTAGTCCGTTATCAACTTGAAAAACTGGCACCGAGTCGGTGCTTTTTTACACTACTACCTGCAGCTGCTGCAGCTGGGAGGCTGAGTTTGGAGACGACGG
1639	ACCACGTCTCACACCGCTGCTGCTGCTGCTGCTGGAGTTTTAGAGCTAGAAATAGCAAGTTAAAATAAGGCTAGTCCGTTATCAACTTGAAAAACTGGCACCGAGTCGGTGCTTTTTTACACTAGCACCTGCAGCTGCTGCTCCCGCAGGGCCGGGTTTGGAGACGACGG
1640	ACCACGTCTCACACCGCTGCTGCTGCTGCTGCTGGAGTTTTAGAGCTAGAAATAGCAAGTTAAAATAAGGCTAGTCCGTTATCAACTTGAAAAACTGGCACCGAGTCGGTGCTTTTTTACACTAGGACCTGCAGCTGCTGCTGCCTGCTGGTTGCGTTTGGAGACGACGG
1641	ACCACGTCTCACACCGCTGCTGCTGCTGCTGCTGGAGTTTTAGAGCTAGAAATAGCAAGTTAAAATAAGGCTAGTCCGTTATCAACTTGAAAAACTGGCACCGAGTCGGTGCTTTTTTACACTCCAACCTGCAGCTGGGGCTGCTGGTAGGGGGAGTTTGGAGACGACGG
1642	ACCACGTCTCACACCGCTGCTGCTGCTGCTGCTGGAGTTTTAGAGCTAGAAATAGCAAGTTAAAATAAGGCTAGTCCGTTATCAACTTGAAAAACTGGCACCGAGTCGGTGCTTTTTTACACTCCTACCTGCAGGTGCTGCCCCTGGAGGGCCTAGTTTGGAGACGACGG
1643	ACCACGTCTCACACCGCTGCTGCTGCTGCTGCTGGAGTTTTAGAGCTAGAAATAGCAAGTTAAAATAAGGCTAGTCCGTTATCAACTTGAAAAACTGGCACCGAGTCGGTGCTTTTTTACACTCGAACCTGCAGGTGGTACTGCTGGAAGGTGATGTTTGGAGACGACGG
1644	ACCACGTCTCACACCGCTGCTGCTGCTGCTGCTGGAGTTTTAGAGCTAGAAATAGCAAGTTAAAATAAGGCTAGTCCGTTATCAACTTGAAAAACTGGCACCGAGTCGGTGCTTTTTTACACTCTGACCTGCCACTGCTGCAGCAGGAGGGCATGGTTTGGAGACGACGG
1645	ACCACGTCTCACACCGCTGCTGCTGCTGCTGCTGGAGTTTTAGAGCTAGAAATAGCAAGTTAAAATAAGGCTAGTCCGTTATCAACTTGAAAAACTGGCACCGAGTCGGTGCTTTTTTACACTGCCACCTGCCGCCGCTGCGGCGGGAGGGGGAGGTTTGGAGACGACGG
1646	ACCACGTCTCACACCGCTGCTGCTGCTGCTGCTGGAGTTTTAGAGCTAGAAATAGCAAGTTAAAATAAGGCTAGTCCGTTATCAACTTGAAAAACTGGCACCGAGTCGGTGCTTTTTTACACTGCGACCTGCCGCTAGTGCTGCTGCATGGTTGGGTTTGGAGACGACGG
1647	ACCACGTCTCACACCGCTGCTGCTGCTGCTGCTGGAGTTTTAGAGCTAGAAATAGCAAGTTAAAATAAGGCTAGTCCGTTATCAACTTGAAAAACTGGCACCGAGTCGGTGCTTTTTTACACTGGAACCTGCCGCTGCTGCAGCATGAAGGCAGCGTTTGGAGACGACGG
1648	ACCACGTCTCACACCGCTGCTGCTGCTGCTGCTGGAGTTTTAGAGCTAGAAATAGCAAGTTAAAATAAGGCTAGTCCGTTATCAACTTGAAAAACTGGCACCGAGTCGGTGCTTTTTTACACTGGCACCTGCCGCTGCTGCTCCGGGCGGGCGTTGTTTGGAGACGACGG
1649	ACCACGTCTCACACCGCTGCTGCTGCTGCTGCTGGAGTTTTAGAGCTAGAAATAGCAAGTTAAAATAAGGCTAGTCCGTTATCAACTTGAAAAACTGGCACCGAGTCGGTGCTTTTTTACACTGTAACCTGCCGCTGCTGCTGCAGGACGGAGGGGTTTGGAGACGACGG
1650	ACCACGTCTCACACCGCTGCTGCTGCTGCTGCTGGAGTTTTAGAGCTAGAAATAGCAAGTTAAAATAAGGCTAGTCCGTTATCAACTTGAAAAACTGGCACCGAGTCGGTGCTTTTTTACACTGTGACCTGCCGCTGCTGCTGCTGCTGGGGCTGGTTTGGAGACGACGG
1651	ACCACGTCTCACACCGCTGCTGCTGCTGCTGCTGGAGTTTTAGAGCTAGAAATAGCAAGTTAAAATAAGGCTAGTCCGTTATCAACTTGAAAAACTGGCACCGAGTCGGTGCTTTTTTACACTGTTACCTGCCGCTGCTGCTGCTGGGAGGATGGGTTTGGAGACGACGG
1652	ACCACGTCTCACACCGCTGCTGCTGCTGCTGCTGGAGTTTTAGAGCTAGAAATAGCAAGTTAAAATAAGGCTAGTCCGTTATCAACTTGAAAAACTGGCACCGAGTCGGTGCTTTTTTACACTTATACCTGCCGTTGCTGCTGTGGGAGGGGAGCGTTTGGAGACGACGG
1653	ACCACGTCTCACACCGCTGCTGCTGCTGCTGCTGGAGTTTTAGAGCTAGAAATAGCAAGTTAAAATAAGGCTAGTCCGTTATCAACTTGAAAAACTGGCACCGAGTCGGTGCTTTTTTACACTTCAACCTGCCTCTGTTGCTGCTGAAGGGCCCAGTTTGGAGACGACGG
1654	ACCACGTCTCACACCGCTGCTGCTGCTGCTGCTGGAGTTTTAGAGCTAGAAATAGCAAGTTAAAATAAGGCTAGTCCGTTATCAACTTGAAAAACTGGCACCGAGTCGGTGCTTTTTTACACTTCTACCTGCGGCAGCAGCTGCTGGATGGTGGCGTTTGGAGACGACGG
1655	ACCACGTCTCACACCGCTGCTGCTGCTGCTGCTGGAGTTTTAGAGCTAGAAATAGCAAGTTAAAATAAGGCTAGTCCGTTATCAACTTGAAAAACTGGCACCGAGTCGGTGCTTTTTTACACTTGCACCTGCGGCGCCTGGTGCTGGACGGTAACGTTTGGAGACGACGG
1656	ACCACGTCTCACACCGCTGCTGCTGCTGCTGCTGGAGTTTTAGAGCTAGAAATAGCAAGTTAAAATAAGGCTAGTCCGTTATCAACTTGAAAAACTGGCACCGAGTCGGTGCTTTTTTACACTTGGACCTGCGGCTACTGCTGCTGCCGGGGCACGTTTGGAGACGACGG
1657	ACCACGTCTCACACCGCTGCTGCTGCTGCTGCTGGAGTTTTAGAGCTAGAAATAGCAAGTTAAAATAAGGCTAGTCCGTTATCAACTTGAAAAACTGGCACCGAGTCGGTGCTTTTTTACACTTGTACCTGCGGCTGCGGCTGCTGGCGGGGGGTGTTTGGAGACGACGG
1658	ACCACGTCTCACACCGCTGCTGCTGCTGCTGCTGGAGTTTTAGAGCTAGAAATAGCAAGTTAAAATAAGGCTAGTCCGTTATCAACTTGAAAAACTGGCACCGAGTCGGTGCTTTTTTACAGAACAACCTGCGGCTGCTGCTGCCTGGCGGGCACGTTTGGAGACGACGG
1659	ACCACGTCTCACACCGCTGCTGCTGCTGCTGCTGGAGTTTTAGAGCTAGAAATAGCAAGTTAAAATAAGGCTAGTCCGTTATCAACTTGAAAAACTGGCACCGAGTCGGTGCTTTTTTACAGAACCACCTGCGGCTGCTGGCCCTGGACGGTCACGTTTGGAGACGACGG
1660	ACCACGTCTCACACCGCTGCTGCTGCTGCTGCTGGAGTTTTAGAGCTAGAAATAGCAAGTTAAAATAAGGCTAGTCCGTTATCAACTTGAAAAACTGGCACCGAGTCGGTGCTTTTTTACAGAACGACCTGCGGCTGGTGCTTCAGGAGGGATTCGTTTGGAGACGACGG
1661	ACCACGTCTCACACCGCTGCTGCTGCTGCTGCTGGAGTTTTAGAGCTAGAAATAGCAAGTTAAAATAAGGCTAGTCCGTTATCAACTTGAAAAACTGGCACCGAGTCGGTGCTTTTTTACAGAACTACCTGCGGTTCCTGCTGATGGAGGGAAGGGTTTGGAGACGACGG
1662	ACCACGTCTCACACCGCTGCTGCTGCTGCTGCTGGAGTTTTAGAGCTAGAAATAGCAAGTTAAAATAAGGCTAGTCCGTTATCAACTTGAAAAACTGGCACCGAGTCGGTGCTTTTTTACAGAATCACCTGCTACTGCTGCTGCTGATGGGGATGGTTTGGAGACGACGG
1663	ACCACGTCTCACACCGCTGCTGCTGCTGCTGCTGGAGTTTTAGAGCTAGAAATAGCAAGTTAAAATAAGGCTAGTCCGTTATCAACTTGAAAAACTGGCACCGAGTCGGTGCTTTTTTACAGAATGACCTGCTACTGCTGCTGCTGCAAGGTTGGGTTTGGAGACGACGG
1664	ACCACGTCTCACACCGCTGCTGCTGCTGCTGCTGGAGTTTTAGAGCTAGAAATAGCAAGTTAAAATAAGGCTAGTCCGTTATCAACTTGAAAAACTGGCACCGAGTCGGTGCTTTTTTACAGACAGACCTGCTACTGCTGCTTCGAGAGGGTGAGGTTTGGAGACGACGG
1665	ACCACGTCTCACACCGCTGCTGCTGCTGCTGCTGGAGTTTTAGAGCTAGAAATAGCAAGTTAAAATAAGGCTAGTCCGTTATCAACTTGAAAAACTGGCACCGAGTCGGTGCTTTTTTACAGACGTACCTGCTCATCCTGGTGCTGGAAGGCCTGGTTTGGAGACGACGG
1666	ACCACGTCTCACACCGCTGCTGCTGCTGCTGCTGGAGTTTTAGAGCTAGAAATAGCAAGTTAAAATAAGGCTAGTCCGTTATCAACTTGAAAAACTGGCACCGAGTCGGTGCTTTTTTACAGAGAGACCTGCTCCAGCTGCAGCTGAAAGGGGCCGTTTGGAGACGACGG
1667	ACCACGTCTCACACCGCTGCTGCTGCTGCTGCTGGAGTTTTAGAGCTAGAAATAGCAAGTTAAAATAAGGCTAGTCCGTTATCAACTTGAAAAACTGGCACCGAGTCGGTGCTTTTTTACAGAGATACCTGCTCCAGCTGCTGCTCCAGGGATGCGTTTGGAGACGACGG
1668	ACCACGTCTCACACCGCTGCTGCTGCTGCTGCTGGAGTTTTAGAGCTAGAAATAGCAAGTTAAAATAAGGCTAGTCCGTTATCAACTTGAAAAACTGGCACCGAGTCGGTGCTTTTTTACAGAGCCACCTGCTCCAGCTGGTGCTGGAAGGGATGGTTTGGAGACGACGG
1669	ACCACGTCTCACACCGCTGCTGCTGCTGCTGCTGGAGTTTTAGAGCTAGAAATAGCAAGTTAAAATAAGGCTAGTCCGTTATCAACTTGAAAAACTGGCACCGAGTCGGTGCTTTTTTACAGAGGTACCTGCTCCTGCTGCTGCCGTCAGGAGACGTTTGGAGACGACGG
1670	ACCACGTCTCACACCGCTGCTGCTGCTGCTGCTGGAGTTTTAGAGCTAGAAATAGCAAGTTAAAATAAGGCTAGTCCGTTATCAACTTGAAAAACTGGCACCGAGTCGGTGCTTTTTTACAGAGTAACCTGCTCCTGCTGCTGCTCCTGGGGGGCGTTTGGAGACGACGG
1671	ACCACGTCTCACACCGCTGCTGCTGCTGCTGCTGGAGTTTTAGAGCTAGAAATAGCAAGTTAAAATAAGGCTAGTCCGTTATCAACTTGAAAAACTGGCACCGAGTCGGTGCTTTTTTACAGAGTTACCTGCTCCTGCTGCTTCTGCCTGGGCCAGTTTGGAGACGACGG
1672	ACCACGTCTCACACCGCTGCTGCTGCTGCTGCTGGAGTTTTAGAGCTAGAAATAGCAAGTTAAAATAAGGCTAGTCCGTTATCAACTTGAAAAACTGGCACCGAGTCGGTGCTTTTTTACAGATACACCTGCTCCTTCTGCTGCAGGATGGAGGCGTTTGGAGACGACGG
1673	ACCACGTCTCACACCGCTGCTGCTGCTGCTGCTGGAGTTTTAGAGCTAGAAATAGCAAGTTAAAATAAGGCTAGTCCGTTATCAACTTGAAAAACTGGCACCGAGTCGGTGCTTTTTTACAGATATACCTGCTCTTCCTGCTGCAGGACGGATGCGTTTGGAGACGACGG
1674	ACCACGTCTCACACCGCTGCTGCTGCTGCTGCTGGAGTTTTAGAGCTAGAAATAGCAAGTTAAAATAAGGCTAGTCCGTTATCAACTTGAAAAACTGGCACCGAGTCGGTGCTTTTTTACAGATCCACCTGCTGAGGCTGGTGCTGGAGGGCAGGGTTTGGAGACGACGG
1675	ACCACGTCTCACACCGCTGCTGCTGCTGCTGCTGGAGTTTTAGAGCTAGAAATAGCAAGTTAAAATAAGGCTAGTCCGTTATCAACTTGAAAAACTGGCACCGAGTCGGTGCTTTTTTACAGATCTACCTGCTGAGGGTGGTGCTGGAGGGATGGGTTTGGAGACGACGG
1676	ACCACGTCTCACACCGCTGCTGCTGCTGCTGCTGGAGTTTTAGAGCTAGAAATAGCAAGTTAAAATAAGGCTAGTCCGTTATCAACTTGAAAAACTGGCACCGAGTCGGTGCTTTTTTACAGATGAACCTGCTGAGTCTGCTGCTGGCTGGAAGGGTTTGGAGACGACGG
1677	ACCACGTCTCACACCGCTGCTGCTGCTGCTGCTGGAGTTTTAGAGCTAGAAATAGCAAGTTAAAATAAGGCTAGTCCGTTATCAACTTGAAAAACTGGCACCGAGTCGGTGCTTTTTTACAGATGCACCTGCTGATGAGGCTGATGGAAGGACTAGTTTGGAGACGACGG
1678	ACCACGTCTCACACCGCTGCTGCTGCTGCTGCTGGAGTTTTAGAGCTAGAAATAGCAAGTTAAAATAAGGCTAGTCCGTTATCAACTTGAAAAACTGGCACCGAGTCGGTGCTTTTTTACAGATTAACCTGCTGATGCTCCTGTTGTATGGATGCGTTTGGAGACGACGG
1679	ACCACGTCTCACACCGCTGCTGCTGCTGCTGCTGGAGTTTTAGAGCTAGAAATAGCAAGTTAAAATAAGGCTAGTCCGTTATCAACTTGAAAAACTGGCACCGAGTCGGTGCTTTTTTACAGATTCACCTGCTGATGCTGCTGCTTCAGGGACCAGTTTGGAGACGACGG
1680	ACCACGTCTCACACCGCTGCTGCTGCTGCTGCTGGAGTTTTAGAGCTAGAAATAGCAAGTTAAAATAAGGCTAGTCCGTTATCAACTTGAAAAACTGGCACCGAGTCGGTGCTTTTTTACAGATTGACCTGCTGATGCTGCTGGTCCAAGGACCAGTTTGGAGACGACGG
1681	ACCACGTCTCACACCGCTGCTGCTGCTGCTGCTGGAGTTTTAGAGCTAGAAATAGCAAGTTAAAATAAGGCTAGTCCGTTATCAACTTGAAAAACTGGCACCGAGTCGGTGCTTTTTTACAGCAGTACCTGCTGCAGATGCTGCTGGGAGGCACAGTTTGGAGACGACGG
1682	ACCACGTCTCACACCGCTGCTGCTGCTGCTGCTGGAGTTTTAGAGCTAGAAATAGCAAGTTAAAATAAGGCTAGTCCGTTATCAACTTGAAAAACTGGCACCGAGTCGGTGCTTTTTTACAGCATAACCTGCTGCAGCGGCTTCTGGATGGCAGGGTTTGGAGACGACGG
1683	ACCACGTCTCACACCGCTGCTGCTGCTGCTGCTGGAGTTTTAGAGCTAGAAATAGCAAGTTAAAATAAGGCTAGTCCGTTATCAACTTGAAAAACTGGCACCGAGTCGGTGCTTTTTTACAGCATCACCTGCTGCAGCTCCAGCTTGAGGGGGTGGTTTGGAGACGACGG
1684	ACCACGTCTCACACCGCTGCTGCTGCTGCTGCTGGAGTTTTAGAGCTAGAAATAGCAAGTTAAAATAAGGCTAGTCCGTTATCAACTTGAAAAACTGGCACCGAGTCGGTGCTTTTTTACAGCCGAACCTGCTGCAGCTGCCTGTGGAAGGGCTAGTTTGGAGACGACGG
1685	ACCACGTCTCACACCGCTGCTGCTGCTGCTGCTGGAGTTTTAGAGCTAGAAATAGCAAGTTAAAATAAGGCTAGTCCGTTATCAACTTGAAAAACTGGCACCGAGTCGGTGCTTTTTTACAGCCGCACCTGCTGCAGCTGCTGCACAATGGCACGGTTTGGAGACGACGG
1686	ACCACGTCTCACACCGCTGCTGCTGCTGCTGCTGGAGTTTTAGAGCTAGAAATAGCAAGTTAAAATAAGGCTAGTCCGTTATCAACTTGAAAAACTGGCACCGAGTCGGTGCTTTTTTACAGCCTGACCTGCTGCAGCTGCTGTTACAAGGATGGGTTTGGAGACGACGG
1687	ACCACGTCTCACACCGCTGCTGCTGCTGCTGCTGGAGTTTTAGAGCTAGAAATAGCAAGTTAAAATAAGGCTAGTCCGTTATCAACTTGAAAAACTGGCACCGAGTCGGTGCTTTTTTACAGCGCCACCTGCTGCAGCTGTTCCAGGAAGGGGGGGTTTGGAGACGACGG
1688	ACCACGTCTCACACCGCTGCTGCTGCTGCTGCTGGAGTTTTAGAGCTAGAAATAGCAAGTTAAAATAAGGCTAGTCCGTTATCAACTTGAAAAACTGGCACCGAGTCGGTGCTTTTTTACAGCGCGACCTGCTGCAGGTGATGCTGGAAGGGAAGGTTTGGAGACGACGG
1689	ACCACGTCTCACACCGCTGCTGCTGCTGCTGCTGGAGTTTTAGAGCTAGAAATAGCAAGTTAAAATAAGGCTAGTCCGTTATCAACTTGAAAAACTGGCACCGAGTCGGTGCTTTTTTACAGCGGAACCTGCTGCAGGTGCTGCTGTTAGGCCCAGTTTGGAGACGACGG
1690	ACCACGTCTCACACCGCTGCTGCTGCTGCTGCTGGAGTTTTAGAGCTAGAAATAGCAAGTTAAAATAAGGCTAGTCCGTTATCAACTTGAAAAACTGGCACCGAGTCGGTGCTTTTTTACAGCGGCACCTGCTGCCACTGCTGATGCATGGACCAGTTTGGAGACGACGG
1691	ACCACGTCTCACACCGCTGCTGCTGCTGCTGCTGGAGTTTTAGAGCTAGAAATAGCAAGTTAAAATAAGGCTAGTCCGTTATCAACTTGAAAAACTGGCACCGAGTCGGTGCTTTTTTACAGCGGTACCTGCTGCCGCCGCTGCTGCTGGGGGCCGTTTGGAGACGACGG
1692	ACCACGTCTCACACCGCTGCTGCTGCTGCTGCTGGAGTTTTAGAGCTAGAAATAGCAAGTTAAAATAAGGCTAGTCCGTTATCAACTTGAAAAACTGGCACCGAGTCGGTGCTTTTTTACAGCGTAACCTGCTGCCGCCGCTGCTGTGGGGACCAGTTTGGAGACGACGG
1693	ACCACGTCTCACACCGCTGCTGCTGCTGCTGCTGGAGTTTTAGAGCTAGAAATAGCAAGTTAAAATAAGGCTAGTCCGTTATCAACTTGAAAAACTGGCACCGAGTCGGTGCTTTTTTACAGCTGAACCTGCTGCCGCTGCCGCCCGACGGAGGCGTTTGGAGACGACGG
1694	ACCACGTCTCACACCGCTGCTGCTGCTGCTGCTGGAGTTTTAGAGCTAGAAATAGCAAGTTAAAATAAGGCTAGTCCGTTATCAACTTGAAAAACTGGCACCGAGTCGGTGCTTTTTTACAGCTGGACCTGCTGCCGCTGCTGCAGCAGGGCCAAGTTTGGAGACGACGG
1695	ACCACGTCTCACACCGCTGCTGCTGCTGCTGCTGGAGTTTTAGAGCTAGAAATAGCAAGTTAAAATAAGGCTAGTCCGTTATCAACTTGAAAAACTGGCACCGAGTCGGTGCTTTTTTACAGGAATACCTGCTGCCTCTACAGCTGGAGGGTTCTGTTTGGAGACGACGG
1696	ACCACGTCTCACACCGCTGCTGCTGCTGCTGCTGGAGTTTTAGAGCTAGAAATAGCAAGTTAAAATAAGGCTAGTCCGTTATCAACTTGAAAAACTGGCACCGAGTCGGTGCTTTTTTACAGGACCACCTGCTGCGGCGGGTGCTGGAGGGGATGGTTTGGAGACGACGG
1697	ACCACGTCTCACACCGCTGCTGCTGCTGCTGCTGGAGTTTTAGAGCTAGAAATAGCAAGTTAAAATAAGGCTAGTCCGTTATCAACTTGAAAAACTGGCACCGAGTCGGTGCTTTTTTACAGGAGAACCTGCTGCGGCTGCTGCCGTGTGGCTCTGTTTGGAGACGACGG
1698	ACCACGTCTCACACCGCTGCTGCTGCTGCTGCTGGAGTTTTAGAGCTAGAAATAGCAAGTTAAAATAAGGCTAGTCCGTTATCAACTTGAAAAACTGGCACCGAGTCGGTGCTTTTTTACAGGAGTACCTGCTGCTACTGCTGATAGTGGGACTTGTTTGGAGACGACGG
1699	ACCACGTCTCACACCGCTGCTGCTGCTGCTGCTGGAGTTTTAGAGCTAGAAATAGCAAGTTAAAATAAGGCTAGTCCGTTATCAACTTGAAAAACTGGCACCGAGTCGGTGCTTTTTTACAGGATAACCTGCTGCTACTGCTGCTACTAGGAGTCGTTTGGAGACGACGG
1700	ACCACGTCTCACACCGCTGCTGCTGCTGCTGCTGGAGTTTTAGAGCTAGAAATAGCAAGTTAAAATAAGGCTAGTCCGTTATCAACTTGAAAAACTGGCACCGAGTCGGTGCTTTTTTACAGGCACACCTGCTGCTACTTGTGCTGTAGGGATGTGTTTGGAGACGACGG
1701	ACCACGTCTCACACCGCTGCTGCTGCTGCTGCTGGAGTTTTAGAGCTAGAAATAGCAAGTTAAAATAAGGCTAGTCCGTTATCAACTTGAAAAACTGGCACCGAGTCGGTGCTTTTTTACAGGCCGACCTGCTGCTATTGCTGCTGTTTGGTAATGTTTGGAGACGACGG
1702	ACCACGTCTCACACCGCTGCTGCTGCTGCTGCTGGAGTTTTAGAGCTAGAAATAGCAAGTTAAAATAAGGCTAGTCCGTTATCAACTTGAAAAACTGGCACCGAGTCGGTGCTTTTTTACAGGCTCACCTGCTGCTCATGCTTCCGGATGGTGGTGTTTGGAGACGACGG
1703	ACCACGTCTCACACCGCTGCTGCTGCTGCTGCTGGAGTTTTAGAGCTAGAAATAGCAAGTTAAAATAAGGCTAGTCCGTTATCAACTTGAAAAACTGGCACCGAGTCGGTGCTTTTTTACAGGCTGACCTGCTGCTCCTGCAGGTGGCGGGGCCCGTTTGGAGACGACGG
1704	ACCACGTCTCACACCGCTGCTGCTGCTGCTGCTGGAGTTTTAGAGCTAGAAATAGCAAGTTAAAATAAGGCTAGTCCGTTATCAACTTGAAAAACTGGCACCGAGTCGGTGCTTTTTTACAGGCTTACCTGCTGCTCCTGCTCCTGGCCGGGCTGGTTTGGAGACGACGG
1705	ACCACGTCTCACACCGCTGCTGCTGCTGCTGCTGGAGTTTTAGAGCTAGAAATAGCAAGTTAAAATAAGGCTAGTCCGTTATCAACTTGAAAAACTGGCACCGAGTCGGTGCTTTTTTACAGGTGGACCTGCTGCTCCTGCTGCTGCCAGGCGCTGTTTGGAGACGACGG
1706	ACCACGTCTCACACCGCTGCTGCTGCTGCTGCTGGAGTTTTAGAGCTAGAAATAGCAAGTTAAAATAAGGCTAGTCCGTTATCAACTTGAAAAACTGGCACCGAGTCGGTGCTTTTTTACAGTAAGACCTGCTGCTCCTGTTACTGGTAGGAATGGTTTGGAGACGACGG
1707	ACCACGTCTCACACCGCTGCTGCTGCTGCTGCTGGAGTTTTAGAGCTAGAAATAGCAAGTTAAAATAAGGCTAGTCCGTTATCAACTTGAAAAACTGGCACCGAGTCGGTGCTTTTTTACAGTAATACCTGCTGCTCTTGCAGCTGGGTGGCTGTGTTTGGAGACGACGG
1708	ACCACGTCTCACACCGCTGCTGCTGCTGCTGCTGGAGTTTTAGAGCTAGAAATAGCAAGTTAAAATAAGGCTAGTCCGTTATCAACTTGAAAAACTGGCACCGAGTCGGTGCTTTTTTACAGTACAACCTGCTGCTGAAGTGGCTGGATGGCCTTGTTTGGAGACGACGG
1709	ACCACGTCTCACACCGCTGCTGCTGCTGCTGCTGGAGTTTTAGAGCTAGAAATAGCAAGTTAAAATAAGGCTAGTCCGTTATCAACTTGAAAAACTGGCACCGAGTCGGTGCTTTTTTACAGTATAACCTGCTGCTGATGCTGGCGGGTGGAAGGGTTTGGAGACGACGG
1710	ACCACGTCTCACACCGCTGCTGCTGCTGCTGCTGGAGTTTTAGAGCTAGAAATAGCAAGTTAAAATAAGGCTAGTCCGTTATCAACTTGAAAAACTGGCACCGAGTCGGTGCTTTTTTACAGTATCACCTGCTGCTGATGGTGGGGGAGGGTGGTGTTTGGAGACGACGG
1711	ACCACGTCTCACACCGCTGCTGCTGCTGCTGCTGGAGTTTTAGAGCTAGAAATAGCAAGTTAAAATAAGGCTAGTCCGTTATCAACTTGAAAAACTGGCACCGAGTCGGTGCTTTTTTACAGTATGACCTGCTGCTGCAGCAGCTGCTTGGCCTTGTTTGGAGACGACGG
1712	ACCACGTCTCACACCGCTGCTGCTGCTGCTGCTGGAGTTTTAGAGCTAGAAATAGCAAGTTAAAATAAGGCTAGTCCGTTATCAACTTGAAAAACTGGCACCGAGTCGGTGCTTTTTTACAGTCATACCTGCTGCTGCAGCCTCTGGCGGGTGCTGTTTGGAGACGACGG
1713	ACCACGTCTCACACCGCTGCTGCTGCTGCTGCTGGAGTTTTAGAGCTAGAAATAGCAAGTTAAAATAAGGCTAGTCCGTTATCAACTTGAAAAACTGGCACCGAGTCGGTGCTTTTTTACAGTCCAACCTGCTGCTGCAGCTGATGGCAGGAAATGTTTGGAGACGACGG
1714	ACCACGTCTCACACCGCTGCTGCTGCTGCTGCTGGAGTTTTAGAGCTAGAAATAGCAAGTTAAAATAAGGCTAGTCCGTTATCAACTTGAAAAACTGGCACCGAGTCGGTGCTTTTTTACAGTCCGACCTGCTGCTGCAGCTGCTGCGGGGACAGGTTTGGAGACGACGG
1715	ACCACGTCTCACACCGCTGCTGCTGCTGCTGCTGGAGTTTTAGAGCTAGAAATAGCAAGTTAAAATAAGGCTAGTCCGTTATCAACTTGAAAAACTGGCACCGAGTCGGTGCTTTTTTACAGTCGGACCTGCTGCTGCAGCTTCTTGGTGGGCCGGTTTGGAGACGACGG
1716	ACCACGTCTCACACCGCTGCTGCTGCTGCTGCTGGAGTTTTAGAGCTAGAAATAGCAAGTTAAAATAAGGCTAGTCCGTTATCAACTTGAAAAACTGGCACCGAGTCGGTGCTTTTTTACAGTCTCACCTGCTGCTGCATCAGCTGGGGGGAGGGGTTTGGAGACGACGG
1717	ACCACGTCTCACACCGCTGCTGCTGCTGCTGCTGGAGTTTTAGAGCTAGAAATAGCAAGTTAAAATAAGGCTAGTCCGTTATCAACTTGAAAAACTGGCACCGAGTCGGTGCTTTTTTACAGTGAGACCTGCTGCTGCCCATGCTGCAGGGCCGGGTTTGGAGACGACGG
1718	ACCACGTCTCACACCGCTGCTGCTGCTGCTGCTGGAGTTTTAGAGCTAGAAATAGCAAGTTAAAATAAGGCTAGTCCGTTATCAACTTGAAAAACTGGCACCGAGTCGGTGCTTTTTTACAGTGATACCTGCTGCTGCCCCCGCGGGAAGGAAATGTTTGGAGACGACGG
1719	ACCACGTCTCACACCGCTGCTGCTGCTGCTGCTGGAGTTTTAGAGCTAGAAATAGCAAGTTAAAATAAGGCTAGTCCGTTATCAACTTGAAAAACTGGCACCGAGTCGGTGCTTTTTTACAGTGCAACCTGCTGCTGCCCTTGCTGGAAGGCACCGTTTGGAGACGACGG
1720	ACCACGTCTCACACCGCTGCTGCTGCTGCTGCTGGAGTTTTAGAGCTAGAAATAGCAAGTTAAAATAAGGCTAGTCCGTTATCAACTTGAAAAACTGGCACCGAGTCGGTGCTTTTTTACAGTGCTACCTGCTGCTGCCGCCGCCGGGCGGCCGGGTTTGGAGACGACGG
1721	ACCACGTCTCACACCGCTGCTGCTGCTGCTGCTGGAGTTTTAGAGCTAGAAATAGCAAGTTAAAATAAGGCTAGTCCGTTATCAACTTGAAAAACTGGCACCGAGTCGGTGCTTTTTTACAGTGGAACCTGCTGCTGCCGCTGCTCAGCGGGGGCGTTTGGAGACGACGG
1722	ACCACGTCTCACACCGCTGCTGCTGCTGCTGCTGGAGTTTTAGAGCTAGAAATAGCAAGTTAAAATAAGGCTAGTCCGTTATCAACTTGAAAAACTGGCACCGAGTCGGTGCTTTTTTACAGTGTCACCTGCTGCTGCCGCTGCTGGCTGGCTTTGTTTGGAGACGACGG
1723	ACCACGTCTCACACCGCTGCTGCTGCTGCTGCTGGAGTTTTAGAGCTAGAAATAGCAAGTTAAAATAAGGCTAGTCCGTTATCAACTTGAAAAACTGGCACCGAGTCGGTGCTTTTTTACAGTGTTACCTGCTGCTGCCGCTGCTGGGCGGTGAGGTTTGGAGACGACGG
1724	ACCACGTCTCACACCGCTGCTGCTGCTGCTGCTGGAGTTTTAGAGCTAGAAATAGCAAGTTAAAATAAGGCTAGTCCGTTATCAACTTGAAAAACTGGCACCGAGTCGGTGCTTTTTTACAGTTATACCTGCTGCTGCCGCTGCTGTGTGGAATCGTTTGGAGACGACGG
1725	ACCACGTCTCACACCGCTGCTGCTGCTGCTGCTGGAGTTTTAGAGCTAGAAATAGCAAGTTAAAATAAGGCTAGTCCGTTATCAACTTGAAAAACTGGCACCGAGTCGGTGCTTTTTTACAGTTCGACCTGCTGCTGCGGCCGTGGGAGGGAGGTGTTTGGAGACGACGG
1726	ACCACGTCTCACACCGCTGCTGCTGCTGCTGCTGGAGTTTTAGAGCTAGAAATAGCAAGTTAAAATAAGGCTAGTCCGTTATCAACTTGAAAAACTGGCACCGAGTCGGTGCTTTTTTACAGTTGGACCTGCTGCTGCTACTGCTGGTAGGAAAAGTTTGGAGACGACGG
1727	ACCACGTCTCACACCGCTGCTGCTGCTGCTGCTGGAGTTTTAGAGCTAGAAATAGCAAGTTAAAATAAGGCTAGTCCGTTATCAACTTGAAAAACTGGCACCGAGTCGGTGCTTTTTTACAGTTGTACCTGCTGCTGCTACTGCTGTACGGTATGGTTTGGAGACGACGG
1728	ACCACGTCTCACACCGCTGCTGCTGCTGCTGCTGGAGTTTTAGAGCTAGAAATAGCAAGTTAAAATAAGGCTAGTCCGTTATCAACTTGAAAAACTGGCACCGAGTCGGTGCTTTTTTACATAACAACCTGCTGCTGCTACTGGTTCAGGGAACAGTTTGGAGACGACGG
1729	ACCACGTCTCACACCGCTGCTGCTGCTGCTGCTGGAGTTTTAGAGCTAGAAATAGCAAGTTAAAATAAGGCTAGTCCGTTATCAACTTGAAAAACTGGCACCGAGTCGGTGCTTTTTTACATAAGCACCTGCTGCTGCTGAATCTGAAAGGTCACGTTTGGAGACGACGG
1730	ACCACGTCTCACACCGCTGCTGCTGCTGCTGCTGGAGTTTTAGAGCTAGAAATAGCAAGTTAAAATAAGGCTAGTCCGTTATCAACTTGAAAAACTGGCACCGAGTCGGTGCTTTTTTACATAAGGACCTGCTGCTGCTGAGCCTGGACGGGCCCGTTTGGAGACGACGG
1731	ACCACGTCTCACACCGCTGCTGCTGCTGCTGCTGGAGTTTTAGAGCTAGAAATAGCAAGTTAAAATAAGGCTAGTCCGTTATCAACTTGAAAAACTGGCACCGAGTCGGTGCTTTTTTACATAAGTACCTGCTGCTGCTGATGGTTGATGGCCGTGTTTGGAGACGACGG
1732	ACCACGTCTCACACCGCTGCTGCTGCTGCTGCTGGAGTTTTAGAGCTAGAAATAGCAAGTTAAAATAAGGCTAGTCCGTTATCAACTTGAAAAACTGGCACCGAGTCGGTGCTTTTTTACATAATGACCTGCTGCTGCTGCAGGAGGCTGGAGGCGTTTGGAGACGACGG
1733	ACCACGTCTCACACCGCTGCTGCTGCTGCTGCTGGAGTTTTAGAGCTAGAAATAGCAAGTTAAAATAAGGCTAGTCCGTTATCAACTTGAAAAACTGGCACCGAGTCGGTGCTTTTTTACATACACACCTGCTGCTGCTGCAGGGGCATGGGAACGTTTGGAGACGACGG
1734	ACCACGTCTCACACCGCTGCTGCTGCTGCTGCTGGAGTTTTAGAGCTAGAAATAGCAAGTTAAAATAAGGCTAGTCCGTTATCAACTTGAAAAACTGGCACCGAGTCGGTGCTTTTTTACATACGAACCTGCTGCTGCTGCCACTCTAGGGTTCAGTTTGGAGACGACGG
1735	ACCACGTCTCACACCGCTGCTGCTGCTGCTGCTGGAGTTTTAGAGCTAGAAATAGCAAGTTAAAATAAGGCTAGTCCGTTATCAACTTGAAAAACTGGCACCGAGTCGGTGCTTTTTTACATACGCACCTGCTGCTGCTGCCACTGCCAGGCTCGGTTTGGAGACGACGG
1736	ACCACGTCTCACACCGCTGCTGCTGCTGCTGCTGGAGTTTTAGAGCTAGAAATAGCAAGTTAAAATAAGGCTAGTCCGTTATCAACTTGAAAAACTGGCACCGAGTCGGTGCTTTTTTACATACTTACCTGCTGCTGCTGCCCCTGCAGGGTCTGGTTTGGAGACGACGG
1737	ACCACGTCTCACACCGCTGCTGCTGCTGCTGCTGGAGTTTTAGAGCTAGAAATAGCAAGTTAAAATAAGGCTAGTCCGTTATCAACTTGAAAAACTGGCACCGAGTCGGTGCTTTTTTACATAGACACCTGCTGCTGCTGCCCCTGGGTGGCCTCGTTTGGAGACGACGG
1738	ACCACGTCTCACACCGCTGCTGCTGCTGCTGCTGGAGTTTTAGAGCTAGAAATAGCAAGTTAAAATAAGGCTAGTCCGTTATCAACTTGAAAAACTGGCACCGAGTCGGTGCTTTTTTACATAGAGACCTGCTGCTGCTGCCCCTGTTGGGTCCCGTTTGGAGACGACGG
1739	ACCACGTCTCACACCGCTGCTGCTGCTGCTGCTGGAGTTTTAGAGCTAGAAATAGCAAGTTAAAATAAGGCTAGTCCGTTATCAACTTGAAAAACTGGCACCGAGTCGGTGCTTTTTTACATAGCGACCTGCTGCTGCTGCCGCTGCTAGGCAAAGTTTGGAGACGACGG
1740	ACCACGTCTCACACCGCTGCTGCTGCTGCTGCTGGAGTTTTAGAGCTAGAAATAGCAAGTTAAAATAAGGCTAGTCCGTTATCAACTTGAAAAACTGGCACCGAGTCGGTGCTTTTTTACATAGCTACCTGCTGCTGCTGCCTGTGGTTGGTCTGGTTTGGAGACGACGG
1741	ACCACGTCTCACACCGCTGCTGCTGCTGCTGCTGGAGTTTTAGAGCTAGAAATAGCAAGTTAAAATAAGGCTAGTCCGTTATCAACTTGAAAAACTGGCACCGAGTCGGTGCTTTTTTACATAGGAACCTGCTGCTGCTGCGGCTCCTGGGACCTGTTTGGAGACGACGG
1742	ACCACGTCTCACACCGCTGCTGCTGCTGCTGCTGGAGTTTTAGAGCTAGAAATAGCAAGTTAAAATAAGGCTAGTCCGTTATCAACTTGAAAAACTGGCACCGAGTCGGTGCTTTTTTACATAGGTACCTGCTGCTGCTGCTAATCCATGGACCAGTTTGGAGACGACGG
1743	ACCACGTCTCACACCGCTGCTGCTGCTGCTGCTGGAGTTTTAGAGCTAGAAATAGCAAGTTAAAATAAGGCTAGTCCGTTATCAACTTGAAAAACTGGCACCGAGTCGGTGCTTTTTTACATAGTAACCTGCTGCTGCTGCTACAACACGGATGCGTTTGGAGACGACGG
1744	ACCACGTCTCACACCGCTGCTGCTGCTGCTGCTGGAGTTTTAGAGCTAGAAATAGCAAGTTAAAATAAGGCTAGTCCGTTATCAACTTGAAAAACTGGCACCGAGTCGGTGCTTTTTTACATAGTCACCTGCTGCTGCTGCTACTGCTCGGGGTGGTTTGGAGACGACGG
1745	ACCACGTCTCACACCGCTGCTGCTGCTGCTGCTGGAGTTTTAGAGCTAGAAATAGCAAGTTAAAATAAGGCTAGTCCGTTATCAACTTGAAAAACTGGCACCGAGTCGGTGCTTTTTTACATAGTTACCTGCTGCTGCTGCTAGTACAAGGACACGTTTGGAGACGACGG
1746	ACCACGTCTCACACCGCTGCTGCTGCTGCTGCTGGAGTTTTAGAGCTAGAAATAGCAAGTTAAAATAAGGCTAGTCCGTTATCAACTTGAAAAACTGGCACCGAGTCGGTGCTTTTTTACATATACACCTGCTGCTGCTGCTATTGTGTGGATGCGTTTGGAGACGACGG
1747	ACCACGTCTCACACCGCTGCTGCTGCTGCTGCTGGAGTTTTAGAGCTAGAAATAGCAAGTTAAAATAAGGCTAGTCCGTTATCAACTTGAAAAACTGGCACCGAGTCGGTGCTTTTTTACATATCAACCTGCTGCTGCTGCTCCAAGCAGGAGGCGTTTGGAGACGACGG
1748	ACCACGTCTCACACCGCTGCTGCTGCTGCTGCTGGAGTTTTAGAGCTAGAAATAGCAAGTTAAAATAAGGCTAGTCCGTTATCAACTTGAAAAACTGGCACCGAGTCGGTGCTTTTTTACATATCTACCTGCTGCTGCTGCTCCAGGCTGGCCCAGTTTGGAGACGACGG
1749	ACCACGTCTCACACCGCTGCTGCTGCTGCTGCTGGAGTTTTAGAGCTAGAAATAGCAAGTTAAAATAAGGCTAGTCCGTTATCAACTTGAAAAACTGGCACCGAGTCGGTGCTTTTTTACATATGAACCTGCTGCTGCTGCTCCTTCCAGGAACTGTTTGGAGACGACGG
1750	ACCACGTCTCACACCGCTGCTGCTGCTGCTGCTGGAGTTTTAGAGCTAGAAATAGCAAGTTAAAATAAGGCTAGTCCGTTATCAACTTGAAAAACTGGCACCGAGTCGGTGCTTTTTTACATATGCACCTGCTGCTGCTGCTCGTCTAGGGACCAGTTTGGAGACGACGG
1751	ACCACGTCTCACACCGCTGCTGCTGCTGCTGCTGGAGTTTTAGAGCTAGAAATAGCAAGTTAAAATAAGGCTAGTCCGTTATCAACTTGAAAAACTGGCACCGAGTCGGTGCTTTTTTACATATTAACCTGCTGCTGCTGCTGAGCCAGGGAAGCGTTTGGAGACGACGG
1752	ACCACGTCTCACACCGCTGCTGCTGCTGCTGCTGGAGTTTTAGAGCTAGAAATAGCAAGTTAAAATAAGGCTAGTCCGTTATCAACTTGAAAAACTGGCACCGAGTCGGTGCTTTTTTACATCAAGACCTGCTGCTGCTGCTGATTTGGGGCACAGTTTGGAGACGACGG
1753	ACCACGTCTCACACCGCTGCTGCTGCTGCTGCTGGAGTTTTAGAGCTAGAAATAGCAAGTTAAAATAAGGCTAGTCCGTTATCAACTTGAAAAACTGGCACCGAGTCGGTGCTTTTTTACATCACAACCTGCTGCTGCTGCTGCACCCTGGCCTCGTTTGGAGACGACGG
1754	ACCACGTCTCACACCGCTGCTGCTGCTGCTGCTGGAGTTTTAGAGCTAGAAATAGCAAGTTAAAATAAGGCTAGTCCGTTATCAACTTGAAAAACTGGCACCGAGTCGGTGCTTTTTTACATCACGACCTGCTGCTGCTGCTGCCACGGGGGTTCGTTTGGAGACGACGG
1755	ACCACGTCTCACACCGCTGCTGCTGCTGCTGCTGGAGTTTTAGAGCTAGAAATAGCAAGTTAAAATAAGGCTAGTCCGTTATCAACTTGAAAAACTGGCACCGAGTCGGTGCTTTTTTACATCATAACCTGCTGCTGCTGCTGCCCGACGGGCCTGTTTGGAGACGACGG
1756	ACCACGTCTCACACCGCTGCTGCTGCTGCTGCTGGAGTTTTAGAGCTAGAAATAGCAAGTTAAAATAAGGCTAGTCCGTTATCAACTTGAAAAACTGGCACCGAGTCGGTGCTTTTTTACATCATCACCTGCTGCTGCTGCTGCGCCTGGGCCAGGTTTGGAGACGACGG
1757	ACCACGTCTCACACCGCTGCTGCTGCTGCTGCTGGAGTTTTAGAGCTAGAAATAGCAAGTTAAAATAAGGCTAGTCCGTTATCAACTTGAAAAACTGGCACCGAGTCGGTGCTTTTTTACATCATGACCTGCTGCTGCTGCTGCTAAAAGGGCTCGTTTGGAGACGACGG
1758	ACCACGTCTCACACCGCTGCTGCTGCTGCTGCTGGAGTTTTAGAGCTAGAAATAGCAAGTTAAAATAAGGCTAGTCCGTTATCAACTTGAAAAACTGGCACCGAGTCGGTGCTTTTTTACATCATTACCTGCTGCTGCTGCTGCTATGGGGGATGGTTTGGAGACGACGG
1759	ACCACGTCTCACACCGCTGCTGCTGCTGCTGCTGGAGTTTTAGAGCTAGAAATAGCAAGTTAAAATAAGGCTAGTCCGTTATCAACTTGAAAAACTGGCACCGAGTCGGTGCTTTTTTACATCGGAACCTGCTGCTGCTGCTGCTCTCGGGCCCGGTTTGGAGACGACGG
1760	ACCACGTCTCACACCGCTGCTGCTGCTGCTGCTGGAGTTTTAGAGCTAGAAATAGCAAGTTAAAATAAGGCTAGTCCGTTATCAACTTGAAAAACTGGCACCGAGTCGGTGCTTTTTTACATCGTAACCTGCTGCTGCTGCTGCTGAGTGGTCAGGTTTGGAGACGACGG
1761	ACCACGTCTCACACCGCTGCTGCTGCTGCTGCTGGAGTTTTAGAGCTAGAAATAGCAAGTTAAAATAAGGCTAGTCCGTTATCAACTTGAAAAACTGGCACCGAGTCGGTGCTTTTTTACATCGTGACCTGCTGCTGCTGCTGCTGCAAGGGGTGGTTTGGAGACGACGG
1762	ACCACGTCTCACACCGCTGCTGCTGCTGCTGCTGGAGTTTTAGAGCTAGAAATAGCAAGTTAAAATAAGGCTAGTCCGTTATCAACTTGAAAAACTGGCACCGAGTCGGTGCTTTTTTACATCGTTACCTGCTGCTGCTGCTGCTGCAGGGACAGGTTTGGAGACGACGG
1763	ACCACGTCTCACACCGCTGCTGCTGCTGCTGCTGGAGTTTTAGAGCTAGAAATAGCAAGTTAAAATAAGGCTAGTCCGTTATCAACTTGAAAAACTGGCACCGAGTCGGTGCTTTTTTACATGCCGACCTGCTGCTGCTGCTGCTGGCAGGTATGGTTTGGAGACGACGG
1764	ACCACGTCTCACACCGCTGCTGCTGCTGCTGCTGGAGTTTTAGAGCTAGAAATAGCAAGTTAAAATAAGGCTAGTCCGTTATCAACTTGAAAAACTGGCACCGAGTCGGTGCTTTTTTACATGCTTACCTGCTGCTGCTGCTGCTGTTGGGAGTTGTTTGGAGACGACGG
1765	ACCACGTCTCACACCGCTGCTGCTGCTGCTGCTGGAGTTTTAGAGCTAGAAATAGCAAGTTAAAATAAGGCTAGTCCGTTATCAACTTGAAAAACTGGCACCGAGTCGGTGCTTTTTTACATGGAGACCTGCTGCTGCTGCTGCTGTTTGGAGAAGTTTGGAGACGACGG
1766	ACCACGTCTCACACCGCTGCTGCTGCTGCTGCTGGAGTTTTAGAGCTAGAAATAGCAAGTTAAAATAAGGCTAGTCCGTTATCAACTTGAAAAACTGGCACCGAGTCGGTGCTTTTTTACATGGCCACAAGCTACTGCTGCTGCTGGATGGCTTGGTTTGGAGACGACGG
1767	ACCACGTCTCACACCGCTGCTGCTGCTGCTGCTGGAGTTTTAGAGCTAGAAATAGCAAGTTAAAATAAGGCTAGTCCGTTATCAACTTGAAAAACTGGCACCGAGTCGGTGCTTTTTTACATGGTAACAAGCTGCTGAGGCTGCTGGAGGGAGCTGTTTGGAGACGACGG
1768	ACCACGTCTCACACCGCTGCTGCTGCTGCTGCTGGAGTTTTAGAGCTAGAAATAGCAAGTTAAAATAAGGCTAGTCCGTTATCAACTTGAAAAACTGGCACCGAGTCGGTGCTTTTTTACATGTATACACGCGGCAGCTGCTGCTGGAGGGGAGCGTTTGGAGACGACGG
1769	ACCACGTCTCACACCGCTGCTGCTGCTGCTGCTGGAGTTTTAGAGCTAGAAATAGCAAGTTAAAATAAGGCTAGTCCGTTATCAACTTGAAAAACTGGCACCGAGTCGGTGCTTTTTTACATGTCCACAGGCAGCTCCTGCTGCTGGAAGGACAGGTTTGGAGACGACGG
1770	ACCACGTCTCACACCGCTGCTGCTGCTGCTGCTGGAGTTTTAGAGCTAGAAATAGCAAGTTAAAATAAGGCTAGTCCGTTATCAACTTGAAAAACTGGCACCGAGTCGGTGCTTTTTTACATTAATACAGGCTGCTGCTGCCCCTGGAAGGCCCCGTTTGGAGACGACGG
1771	ACCACGTCTCACACCGCTGCTGCTGCTGCTGCTGGAGTTTTAGAGCTAGAAATAGCAAGTTAAAATAAGGCTAGTCCGTTATCAACTTGAAAAACTGGCACCGAGTCGGTGCTTTTTTACATTACAACAGGCTGCTGCTGCTGCAGGAGGGGTCAGTTTGGAGACGACGG
1772	ACCACGTCTCACACCGCTGCTGCTGCTGCTGCTGGAGTTTTAGAGCTAGAAATAGCAAGTTAAAATAAGGCTAGTCCGTTATCAACTTGAAAAACTGGCACCGAGTCGGTGCTTTTTTACATTAGCACAGGCTGCTGCTGCTGCTGTCGGGGCTCGTTTGGAGACGACGG
1773	ACCACGTCTCACACCGCTGCTGCTGCTGCTGCTGGAGTTTTAGAGCTAGAAATAGCAAGTTAAAATAAGGCTAGTCCGTTATCAACTTGAAAAACTGGCACCGAGTCGGTGCTTTTTTACATTAGGACAGGCTGCTGCTGCTGCTTGCAGGTCTAGTTTGGAGACGACGG
1774	ACCACGTCTCACACCGCTGCTGCTGCTGCTGCTGGAGTTTTAGAGCTAGAAATAGCAAGTTAAAATAAGGCTAGTCCGTTATCAACTTGAAAAACTGGCACCGAGTCGGTGCTTTTTTACATTCACACATGATGCTGCTGCTGCTCCAAGGACCAGTTTGGAGACGACGG
1775	ACCACGTCTCACACCGCTGCTGCTGCTGCTGCTGGAGTTTTAGAGCTAGAAATAGCAAGTTAAAATAAGGCTAGTCCGTTATCAACTTGAAAAACTGGCACCGAGTCGGTGCTTTTTTACATTCAGACATGATGCTGCTGCTGCTGCAGGGTGATGTTTGGAGACGACGG
1776	ACCACGTCTCACACCGCTGCTGCTGCTGCTGCTGGAGTTTTAGAGCTAGAAATAGCAAGTTAAAATAAGGCTAGTCCGTTATCAACTTGAAAAACTGGCACCGAGTCGGTGCTTTTTTACATTCATACATGCAGCTGCTGCTGGTTGAGGGACCGGTTTGGAGACGACGG
1777	ACCACGTCTCACACCGCTGCTGCTGCTGCTGCTGGAGTTTTAGAGCTAGAAATAGCAAGTTAAAATAAGGCTAGTCCGTTATCAACTTGAAAAACTGGCACCGAGTCGGTGCTTTTTTACATTCTCACATGCTGCTCCCTCTGCTGGAAGGTACTGTTTGGAGACGACGG
1778	ACCACGTCTCACACCGCTGCTGCTGCTGCTGCTGGAGTTTTAGAGCTAGAAATAGCAAGTTAAAATAAGGCTAGTCCGTTATCAACTTGAAAAACTGGCACCGAGTCGGTGCTTTTTTACATTCTTACATGCTGCTGATGCTTCTGGTTGGGAGAGTTTGGAGACGACGG
1779	ACCACGTCTCACACCGCTGCTGCTGCTGCTGCTGGAGTTTTAGAGCTAGAAATAGCAAGTTAAAATAAGGCTAGTCCGTTATCAACTTGAAAAACTGGCACCGAGTCGGTGCTTTTTTACATTGACACATGCTGCTGCTCCTGCTGACTGGCGTAGTTTGGAGACGACGG
1780	ACCACGTCTCACACCGCTGCTGCTGCTGCTGCTGGAGTTTTAGAGCTAGAAATAGCAAGTTAAAATAAGGCTAGTCCGTTATCAACTTGAAAAACTGGCACCGAGTCGGTGCTTTTTTACATTGCCACATGCTGCTGCTGCTGCTCTAAGGACCAGTTTGGAGACGACGG
1781	ACCACGTCTCACACCGCTGCTGCTGCTGCTGCTGGAGTTTTAGAGCTAGAAATAGCAAGTTAAAATAAGGCTAGTCCGTTATCAACTTGAAAAACTGGCACCGAGTCGGTGCTTTTTTACATTGCTACATGCTGCTGCTGCTGCTCTCAGGTTCAGTTTGGAGACGACGG
1782	ACCACGTCTCACACCGCTGCTGCTGCTGCTGCTGGAGTTTTAGAGCTAGAAATAGCAAGTTAAAATAAGGCTAGTCCGTTATCAACTTGAAAAACTGGCACCGAGTCGGTGCTTTTTTACATTGGTACATGCTGCTGCTGCTGGTGGTTGGAGCCGTTTGGAGACGACGG
1783	ACCACGTCTCACACCGCTGCTGCTGCTGCTGCTGGAGTTTTAGAGCTAGAAATAGCAAGTTAAAATAAGGCTAGTCCGTTATCAACTTGAAAAACTGGCACCGAGTCGGTGCTTTTTTACCAACACACATGCTGCTGCTGGTGGTGCAGGGACTAGTTTGGAGACGACGG
1784	ACCACGTCTCACACCGCTGCTGCTGCTGCTGCTGGAGTTTTAGAGCTAGAAATAGCAAGTTAAAATAAGGCTAGTCCGTTATCAACTTGAAAAACTGGCACCGAGTCGGTGCTTTTTTACCAACCGACATGCTGCTGGTGCTGCTCTATGGACCGGTTTGGAGACGACGG
1785	ACCACGTCTCACACCGCTGCTGCTGCTGCTGCTGGAGTTTTAGAGCTAGAAATAGCAAGTTAAAATAAGGCTAGTCCGTTATCAACTTGAAAAACTGGCACCGAGTCGGTGCTTTTTTACCAACCTACATGCTGCTGGTGCTGGTGCATGGACCAGTTTGGAGACGACGG
1786	ACCACGTCTCACACCGCTGCTGCTGCTGCTGCTGGAGTTTTAGAGCTAGAAATAGCAAGTTAAAATAAGGCTAGTCCGTTATCAACTTGAAAAACTGGCACCGAGTCGGTGCTTTTTTACCAACGGACATGCTGGTCCTGCAGCTGGATGGCCCCGTTTGGAGACGACGG
1787	ACCACGTCTCACACCGCTGCTGCTGCTGCTGCTGGAGTTTTAGAGCTAGAAATAGCAAGTTAAAATAAGGCTAGTCCGTTATCAACTTGAAAAACTGGCACCGAGTCGGTGCTTTTTTACCAAGCAACATGCTGTTCCTGTTGCTGGAAGGGTCCGTTTGGAGACGACGG
1788	ACCACGTCTCACACCGCTGCTGCTGCTGCTGCTGGAGTTTTAGAGCTAGAAATAGCAAGTTAAAATAAGGCTAGTCCGTTATCAACTTGAAAAACTGGCACCGAGTCGGTGCTTTTTTACCAAGTGACATTCTGCTGCTGCTGCTGGCTGGGGCGGTTTGGAGACGACGG
1789	ACCACGTCTCACACCGCTGCTGCTGCTGCTGCTGGAGTTTTAGAGCTAGAAATAGCAAGTTAAAATAAGGCTAGTCCGTTATCAACTTGAAAAACTGGCACCGAGTCGGTGCTTTTTTACCAAGTTACATTCTGCTTCTGCTGCAGGAGGGCGTCGTTTGGAGACGACGG
1790	ACCACGTCTCACACCGCTGCTGCTGCTGCTGCTGGAGTTTTAGAGCTAGAAATAGCAAGTTAAAATAAGGCTAGTCCGTTATCAACTTGAAAAACTGGCACCGAGTCGGTGCTTTTTTACCAATACACCAACTGCTGGTGCGGCTGGAGGGCGGTGTTTGGAGACGACGG
1791	ACCACGTCTCACACCGCTGCTGCTGCTGCTGCTGGAGTTTTAGAGCTAGAAATAGCAAGTTAAAATAAGGCTAGTCCGTTATCAACTTGAAAAACTGGCACCGAGTCGGTGCTTTTTTACCAATAGACCACCTGAAGCTGCTGCTGGAGGGACCAGTTTGGAGACGACGG
1792	ACCACGTCTCACACCGCTGCTGCTGCTGCTGCTGGAGTTTTAGAGCTAGAAATAGCAAGTTAAAATAAGGCTAGTCCGTTATCAACTTGAAAAACTGGCACCGAGTCGGTGCTTTTTTACCAATATACCACCTGCTCCTCCTGCTGGAAGGCTTCGTTTGGAGACGACGG
1793	ACCACGTCTCACACCGCTGCTGCTGCTGCTGCTGGAGTTTTAGAGCTAGAAATAGCAAGTTAAAATAAGGCTAGTCCGTTATCAACTTGAAAAACTGGCACCGAGTCGGTGCTTTTTTACCAATCAACCACCTGCTGCTGCTGCTGTGTGGCGTCGTTTGGAGACGACGG
1794	ACCACGTCTCACACCGCTGCTGCTGCTGCTGCTGGAGTTTTAGAGCTAGAAATAGCAAGTTAAAATAAGGCTAGTCCGTTATCAACTTGAAAAACTGGCACCGAGTCGGTGCTTTTTTACCAATCTACCAGATGGTTCTGCTGCTGGAAGGGTCAGTTTGGAGACGACGG
1795	ACCACGTCTCACACCGCTGCTGCTGCTGCTGCTGGAGTTTTAGAGCTAGAAATAGCAAGTTAAAATAAGGCTAGTCCGTTATCAACTTGAAAAACTGGCACCGAGTCGGTGCTTTTTTACCAATTCACCAGCTGCAGCTGCTCCTGGCGGGCCCTGTTTGGAGACGACGG
1796	ACCACGTCTCACACCGCTGCTGCTGCTGCTGCTGGAGTTTTAGAGCTAGAAATAGCAAGTTAAAATAAGGCTAGTCCGTTATCAACTTGAAAAACTGGCACCGAGTCGGTGCTTTTTTACCACACGACCAGCTGCGGCAGCTGCTGAAGGGTGAGGTTTGGAGACGACGG
1797	ACCACGTCTCACACCGCTGCTGCTGCTGCTGCTGGAGTTTTAGAGCTAGAAATAGCAAGTTAAAATAAGGCTAGTCCGTTATCAACTTGAAAAACTGGCACCGAGTCGGTGCTTTTTTACCACACTACCAGCTGCTACTGCTACTGGCCGGTGAGGTTTGGAGACGACGG
1798	ACCACGTCTCACACCGCTGCTGCTGCTGCTGCTGGAGTTTTAGAGCTAGAAATAGCAAGTTAAAATAAGGCTAGTCCGTTATCAACTTGAAAAACTGGCACCGAGTCGGTGCTTTTTTACCACAGCACCAGCTGCTGATGAGGCTGGAGGGCGGGGTTTGGAGACGACGG
1799	ACCACGTCTCACACCGCTGCTGCTGCTGCTGCTGGAGTTTTAGAGCTAGAAATAGCAAGTTAAAATAAGGCTAGTCCGTTATCAACTTGAAAAACTGGCACCGAGTCGGTGCTTTTTTACCACAGTACCAGCTGCTGCAGCTGGCGGATGGCCGAGTTTGGAGACGACGG
1800	ACCACGTCTCACACCGCTGCTGCTGCTGCTGCTGGAGTTTTAGAGCTAGAAATAGCAAGTTAAAATAAGGCTAGTCCGTTATCAACTTGAAAAACTGGCACCGAGTCGGTGCTTTTTTACCACATAACCAGCTGCTGCAGGTGCTGGCCGGCGGCGTTTGGAGACGACGG
1801	ACCACGTCTCACACCGCTGCTGCTGCTGCTGCTGGAGTTTTAGAGCTAGAAATAGCAAGTTAAAATAAGGCTAGTCCGTTATCAACTTGAAAAACTGGCACCGAGTCGGTGCTTTTTTACCACATCACCAGCTGCTGCTAGGGCTGGAGGGAATCGTTTGGAGACGACGG
1802	ACCACGTCTCACACCGCTGCTGCTGCTGCTGCTGGAGTTTTAGAGCTAGAAATAGCAAGTTAAAATAAGGCTAGTCCGTTATCAACTTGAAAAACTGGCACCGAGTCGGTGCTTTTTTACCACCTAACCAGCTGCTGCTGCTGCTGCATGGGAAGGTTTGGAGACGACGG
1803	ACCACGTCTCACACCGCTGCTGCTGCTGCTGCTGGAGTTTTAGAGCTAGAAATAGCAAGTTAAAATAAGGCTAGTCCGTTATCAACTTGAAAAACTGGCACCGAGTCGGTGCTTTTTTACCACCTCACCAGCTGCTGCTGCTGCTGTTCGGGGCTGTTTGGAGACGACGG
1804	ACCACGTCTCACACCGCTGCTGCTGCTGCTGCTGGAGTTTTAGAGCTAGAAATAGCAAGTTAAAATAAGGCTAGTCCGTTATCAACTTGAAAAACTGGCACCGAGTCGGTGCTTTTTTACCACCTTACCAGCTGCTGCTGTTGCTGCATGGAAACGTTTGGAGACGACGG
1805	ACCACGTCTCACACCGCTGCTGCTGCTGCTGCTGGAGTTTTAGAGCTAGAAATAGCAAGTTAAAATAAGGCTAGTCCGTTATCAACTTGAAAAACTGGCACCGAGTCGGTGCTTTTTTACCACTACACCCACAGCTGCTGCTTCTGGATGGCAGAGTTTGGAGACGACGG
1806	ACCACGTCTCACACCGCTGCTGCTGCTGCTGCTGGAGTTTTAGAGCTAGAAATAGCAAGTTAAAATAAGGCTAGTCCGTTATCAACTTGAAAAACTGGCACCGAGTCGGTGCTTTTTTACCACTAGACCCACTGCGGCTCCTGCTGGAAGGGAATGTTTGGAGACGACGG
1807	ACCACGTCTCACACCGCTGCTGCTGCTGCTGCTGGAGTTTTAGAGCTAGAAATAGCAAGTTAAAATAAGGCTAGTCCGTTATCAACTTGAAAAACTGGCACCGAGTCGGTGCTTTTTTACCACTATACCCACTGCTGCTCCAGCTGGAGGGGACCGTTTGGAGACGACGG
1808	ACCACGTCTCACACCGCTGCTGCTGCTGCTGCTGGAGTTTTAGAGCTAGAAATAGCAAGTTAAAATAAGGCTAGTCCGTTATCAACTTGAAAAACTGGCACCGAGTCGGTGCTTTTTTACCACTCAACCCACTGCTGCTCGTGCTGGAGGGGACCGTTTGGAGACGACGG
1809	ACCACGTCTCACACCGCTGCTGCTGCTGCTGCTGGAGTTTTAGAGCTAGAAATAGCAAGTTAAAATAAGGCTAGTCCGTTATCAACTTGAAAAACTGGCACCGAGTCGGTGCTTTTTTACCACTCGACCCACTGCTGCTGCTGCTGCTGGGAGCCGTTTGGAGACGACGG
1810	ACCACGTCTCACACCGCTGCTGCTGCTGCTGCTGGAGTTTTAGAGCTAGAAATAGCAAGTTAAAATAAGGCTAGTCCGTTATCAACTTGAAAAACTGGCACCGAGTCGGTGCTTTTTTACCACTGTACCCCCTGCAGCTGCTGCTGCAGGGAAAAGTTTGGAGACGACGG
1811	ACCACGTCTCACACCGCTGCTGCTGCTGCTGCTGGAGTTTTAGAGCTAGAAATAGCAAGTTAAAATAAGGCTAGTCCGTTATCAACTTGAAAAACTGGCACCGAGTCGGTGCTTTTTTACCACTTCACCCCCTGCTCCTGCTCCTGGAAGGCCTGGTTTGGAGACGACGG
1812	ACCACGTCTCACACCGCTGCTGCTGCTGCTGCTGGAGTTTTAGAGCTAGAAATAGCAAGTTAAAATAAGGCTAGTCCGTTATCAACTTGAAAAACTGGCACCGAGTCGGTGCTTTTTTACCAGAACACCCCCTGCTGCTGCTGCTAGCGGGGCCGGTTTGGAGACGACGG
1813	ACCACGTCTCACACCGCTGCTGCTGCTGCTGCTGGAGTTTTAGAGCTAGAAATAGCAAGTTAAAATAAGGCTAGTCCGTTATCAACTTGAAAAACTGGCACCGAGTCGGTGCTTTTTTACCAGAATACCCCTTGCAGCTGCTGCTGGACGGCCAGGTTTGGAGACGACGG
1814	ACCACGTCTCACACCGCTGCTGCTGCTGCTGCTGGAGTTTTAGAGCTAGAAATAGCAAGTTAAAATAAGGCTAGTCCGTTATCAACTTGAAAAACTGGCACCGAGTCGGTGCTTTTTTACCAGACTACCCGATGCTGCTGCTTCTGGCGGGTGGCGTTTGGAGACGACGG
1815	ACCACGTCTCACACCGCTGCTGCTGCTGCTGCTGGAGTTTTAGAGCTAGAAATAGCAAGTTAAAATAAGGCTAGTCCGTTATCAACTTGAAAAACTGGCACCGAGTCGGTGCTTTTTTACCAGAGAACCCGCAGCTGCCGCTGCTGCAGGGAGATGTTTGGAGACGACGG
1816	ACCACGTCTCACACCGCTGCTGCTGCTGCTGCTGGAGTTTTAGAGCTAGAAATAGCAAGTTAAAATAAGGCTAGTCCGTTATCAACTTGAAAAACTGGCACCGAGTCGGTGCTTTTTTACCAGAGTACCCGCAGCTGCTGCAGCTGGACGGAAGCGTTTGGAGACGACGG
1817	ACCACGTCTCACACCGCTGCTGCTGCTGCTGCTGGAGTTTTAGAGCTAGAAATAGCAAGTTAAAATAAGGCTAGTCCGTTATCAACTTGAAAAACTGGCACCGAGTCGGTGCTTTTTTACCAGATAACCCGCCACTGCTGCTGCTGGCGGGGGCCGTTTGGAGACGACGG
1818	ACCACGTCTCACACCGCTGCTGCTGCTGCTGCTGGAGTTTTAGAGCTAGAAATAGCAAGTTAAAATAAGGCTAGTCCGTTATCAACTTGAAAAACTGGCACCGAGTCGGTGCTTTTTTACCAGATCACCCGCCGCTGCTGCTGCTGGTGGGTGCAGTTTGGAGACGACGG
1819	ACCACGTCTCACACCGCTGCTGCTGCTGCTGCTGGAGTTTTAGAGCTAGAAATAGCAAGTTAAAATAAGGCTAGTCCGTTATCAACTTGAAAAACTGGCACCGAGTCGGTGCTTTTTTACCAGCACACCCGCTGCAGGCGCTGCTGGACGGCCGCGTTTGGAGACGACGG
1820	ACCACGTCTCACACCGCTGCTGCTGCTGCTGCTGGAGTTTTAGAGCTAGAAATAGCAAGTTAAAATAAGGCTAGTCCGTTATCAACTTGAAAAACTGGCACCGAGTCGGTGCTTTTTTACCAGCAGACCCGCTGCTGATGCTGCAGGCCGGGGACGTTTGGAGACGACGG
1821	ACCACGTCTCACACCGCTGCTGCTGCTGCTGCTGGAGTTTTAGAGCTAGAAATAGCAAGTTAAAATAAGGCTAGTCCGTTATCAACTTGAAAAACTGGCACCGAGTCGGTGCTTTTTTACCAGCATACCCGCTGCTGCTGCCGCTGCCGGGTCGCGTTTGGAGACGACGG
1822	ACCACGTCTCACACCGCTGCTGCTGCTGCTGCTGGAGTTTTAGAGCTAGAAATAGCAAGTTAAAATAAGGCTAGTCCGTTATCAACTTGAAAAACTGGCACCGAGTCGGTGCTTTTTTACCAGCCGACCCGCTGCTGCTGCCGCTGCTCGGGCTGGTTTGGAGACGACGG
1823	ACCACGTCTCACACCGCTGCTGCTGCTGCTGCTGGAGTTTTAGAGCTAGAAATAGCAAGTTAAAATAAGGCTAGTCCGTTATCAACTTGAAAAACTGGCACCGAGTCGGTGCTTTTTTACCAGCGTACCCGCTGCTGCTGCTGCCTGGGGGCCAAGTTTGGAGACGACGG
1824	ACCACGTCTCACACCGCTGCTGCTGCTGCTGCTGGAGTTTTAGAGCTAGAAATAGCAAGTTAAAATAAGGCTAGTCCGTTATCAACTTGAAAAACTGGCACCGAGTCGGTGCTTTTTTACCAGCTAACCCGCTGCTGCTGCTGCTGCCCGGGAGGGTTTGGAGACGACGG
1825	ACCACGTCTCACACCGCTGCTGCTGCTGCTGCTGGAGTTTTAGAGCTAGAAATAGCAAGTTAAAATAAGGCTAGTCCGTTATCAACTTGAAAAACTGGCACCGAGTCGGTGCTTTTTTACCAGGAGACCCGCTGCTTCCCCTGCTGGAGGGCCTTGTTTGGAGACGACGG
1826	ACCACGTCTCACACCGCTGCTGCTGCTGCTGCTGGAGTTTTAGAGCTAGAAATAGCAAGTTAAAATAAGGCTAGTCCGTTATCAACTTGAAAAACTGGCACCGAGTCGGTGCTTTTTTACCAGGATACCCGCTGGTGCTGCTGCTGCAGGGTCAGGTTTGGAGACGACGG
1827	ACCACGTCTCACACCGCTGCTGCTGCTGCTGCTGGAGTTTTAGAGCTAGAAATAGCAAGTTAAAATAAGGCTAGTCCGTTATCAACTTGAAAAACTGGCACCGAGTCGGTGCTTTTTTACCAGGCGACCCGGTGCTGCTGCTGGAGGAGGGAATTGTTTGGAGACGACGG
1828	ACCACGTCTCACACCGCTGCTGCTGCTGCTGCTGGAGTTTTAGAGCTAGAAATAGCAAGTTAAAATAAGGCTAGTCCGTTATCAACTTGAAAAACTGGCACCGAGTCGGTGCTTTTTTACCAGGCTACCCTCTGCCGCTGCTGGTGGAAGGCAGCGTTTGGAGACGACGG
1829	ACCACGTCTCACACCGCTGCTGCTGCTGCTGCTGGAGTTTTAGAGCTAGAAATAGCAAGTTAAAATAAGGCTAGTCCGTTATCAACTTGAAAAACTGGCACCGAGTCGGTGCTTTTTTACCAGGTAACCCTCTGCTGCAGCTGCTGGATGGCCCCGTTTGGAGACGACGG
1830	ACCACGTCTCACACCGCTGCTGCTGCTGCTGCTGGAGTTTTAGAGCTAGAAATAGCAAGTTAAAATAAGGCTAGTCCGTTATCAACTTGAAAAACTGGCACCGAGTCGGTGCTTTTTTACCAGGTTACCGACTGCTGCTGCTGCTGCCCGGACGTGTTTGGAGACGACGG
1831	ACCACGTCTCACACCGCTGCTGCTGCTGCTGCTGGAGTTTTAGAGCTAGAAATAGCAAGTTAAAATAAGGCTAGTCCGTTATCAACTTGAAAAACTGGCACCGAGTCGGTGCTTTTTTACCAGTAGACCGCCAGCTGCTGCTGCTGTAGGGACTAGTTTGGAGACGACGG
1832	ACCACGTCTCACACCGCTGCTGCTGCTGCTGCTGGAGTTTTAGAGCTAGAAATAGCAAGTTAAAATAAGGCTAGTCCGTTATCAACTTGAAAAACTGGCACCGAGTCGGTGCTTTTTTACCAGTATACCGCCTGCTGCTGCTGCTCGCCGGCGCCGTTTGGAGACGACGG
1833	ACCACGTCTCACACCGCTGCTGCTGCTGCTGCTGGAGTTTTAGAGCTAGAAATAGCAAGTTAAAATAAGGCTAGTCCGTTATCAACTTGAAAAACTGGCACCGAGTCGGTGCTTTTTTACCAGTCAACCGCCTGGTGCTGCTGCTGAAAGGGCAGGTTTGGAGACGACGG
1834	ACCACGTCTCACACCGCTGCTGCTGCTGCTGCTGGAGTTTTAGAGCTAGAAATAGCAAGTTAAAATAAGGCTAGTCCGTTATCAACTTGAAAAACTGGCACCGAGTCGGTGCTTTTTTACCAGTCGACCGGCGCCTGCTGCAGCTGGATGGCGGCGTTTGGAGACGACGG
1835	ACCACGTCTCACACCGCTGCTGCTGCTGCTGCTGGAGTTTTAGAGCTAGAAATAGCAAGTTAAAATAAGGCTAGTCCGTTATCAACTTGAAAAACTGGCACCGAGTCGGTGCTTTTTTACCAGTCTACCGGCGGCCGCGGCTGCTGGAGGGAAACGTTTGGAGACGACGG
1836	ACCACGTCTCACACCGCTGCTGCTGCTGCTGCTGGAGTTTTAGAGCTAGAAATAGCAAGTTAAAATAAGGCTAGTCCGTTATCAACTTGAAAAACTGGCACCGAGTCGGTGCTTTTTTACCAGTGAACCGGCGGCTGCTGCTGCTGCAGGGGCCGGTTTGGAGACGACGG
1837	ACCACGTCTCACACCGCTGCTGCTGCTGCTGCTGGAGTTTTAGAGCTAGAAATAGCAAGTTAAAATAAGGCTAGTCCGTTATCAACTTGAAAAACTGGCACCGAGTCGGTGCTTTTTTACCAGTGTACCGGCTGCAGCTGCTGCGGGGCGGGGAGGTTTGGAGACGACGG
1838	ACCACGTCTCACACCGCTGCTGCTGCTGCTGCTGGAGTTTTAGAGCTAGAAATAGCAAGTTAAAATAAGGCTAGTCCGTTATCAACTTGAAAAACTGGCACCGAGTCGGTGCTTTTTTACCAGTTAACCGGCTGCAGGTGCTGCAGGAGGGCGTCGTTTGGAGACGACGG
1839	ACCACGTCTCACACCGCTGCTGCTGCTGCTGCTGGAGTTTTAGAGCTAGAAATAGCAAGTTAAAATAAGGCTAGTCCGTTATCAACTTGAAAAACTGGCACCGAGTCGGTGCTTTTTTACCAGTTCACCGGCTGCCACTGCTGCTGAAAGGAACCGTTTGGAGACGACGG
1840	ACCACGTCTCACACCGCTGCTGCTGCTGCTGCTGGAGTTTTAGAGCTAGAAATAGCAAGTTAAAATAAGGCTAGTCCGTTATCAACTTGAAAAACTGGCACCGAGTCGGTGCTTTTTTACCAGTTGACCGGCTGCTCCTGCTGCTGGGGGGAGCGGTTTGGAGACGACGG
1841	ACCACGTCTCACACCGCTGCTGCTGCTGCTGCTGGAGTTTTAGAGCTAGAAATAGCAAGTTAAAATAAGGCTAGTCCGTTATCAACTTGAAAAACTGGCACCGAGTCGGTGCTTTTTTACCATAGCACCGGGTGATGCTGCTGCTTGAGGGAACAGTTTGGAGACGACGG
1842	ACCACGTCTCACACCGCTGCTGCTGCTGCTGCTGGAGTTTTAGAGCTAGAAATAGCAAGTTAAAATAAGGCTAGTCCGTTATCAACTTGAAAAACTGGCACCGAGTCGGTGCTTTTTTACCATCACACCTACAGCTACTGCCGCTGGAGGGGAGGGTTTGGAGACGACGG
1843	ACCACGTCTCACACCGCTGCTGCTGCTGCTGCTGGAGTTTTAGAGCTAGAAATAGCAAGTTAAAATAAGGCTAGTCCGTTATCAACTTGAAAAACTGGCACCGAGTCGGTGCTTTTTTACCATCAGACCTACCGCTGCTGCTGCTGCTGGGAGAGGTTTGGAGACGACGG
1844	ACCACGTCTCACACCGCTGCTGCTGCTGCTGCTGGAGTTTTAGAGCTAGAAATAGCAAGTTAAAATAAGGCTAGTCCGTTATCAACTTGAAAAACTGGCACCGAGTCGGTGCTTTTTTACCATCATACCTACTCCTGCAGCTACTGGAAGGGCCGGTTTGGAGACGACGG
1845	ACCACGTCTCACACCGCTGCTGCTGCTGCTGCTGGAGTTTTAGAGCTAGAAATAGCAAGTTAAAATAAGGCTAGTCCGTTATCAACTTGAAAAACTGGCACCGAGTCGGTGCTTTTTTACCATCCAACCTACTCCTGCTGCTGTTGGAAGGGCAGGTTTGGAGACGACGG
1846	ACCACGTCTCACACCGCTGCTGCTGCTGCTGCTGGAGTTTTAGAGCTAGAAATAGCAAGTTAAAATAAGGCTAGTCCGTTATCAACTTGAAAAACTGGCACCGAGTCGGTGCTTTTTTACCATCCTACCTACTGCAGCTGCCGCAGGAAGGCGTTGTTTGGAGACGACGG
1847	ACCACGTCTCACACCGCTGCTGCTGCTGCTGCTGGAGTTTTAGAGCTAGAAATAGCAAGTTAAAATAAGGCTAGTCCGTTATCAACTTGAAAAACTGGCACCGAGTCGGTGCTTTTTTACCATCGCACCTACTGCTGAAGCTGATGGATGGGGCGGTTTGGAGACGACGG
1848	ACCACGTCTCACACCGCTGCTGCTGCTGCTGCTGGAGTTTTAGAGCTAGAAATAGCAAGTTAAAATAAGGCTAGTCCGTTATCAACTTGAAAAACTGGCACCGAGTCGGTGCTTTTTTACCATCGTACCTACTGCTGCAGCTGCTGGCGGGGCTGGTTTGGAGACGACGG
1849	ACCACGTCTCACACCGCTGCTGCTGCTGCTGCTGGAGTTTTAGAGCTAGAAATAGCAAGTTAAAATAAGGCTAGTCCGTTATCAACTTGAAAAACTGGCACCGAGTCGGTGCTTTTTTACCATCTAACCTACTGCTGCCGCTGCTGCCTGGGGAAGTTTGGAGACGACGG
1850	ACCACGTCTCACACCGCTGCTGCTGCTGCTGCTGGAGTTTTAGAGCTAGAAATAGCAAGTTAAAATAAGGCTAGTCCGTTATCAACTTGAAAAACTGGCACCGAGTCGGTGCTTTTTTACCATGCCACCTCATGCTGCTGCTACTGCATGGAGAGGTTTGGAGACGACGG
1851	ACCACGTCTCACACCGCTGCTGCTGCTGCTGCTGGAGTTTTAGAGCTAGAAATAGCAAGTTAAAATAAGGCTAGTCCGTTATCAACTTGAAAAACTGGCACCGAGTCGGTGCTTTTTTACCATGCGACCTCCACTTGCTGCTGCTGGAGGGTAAGGTTTGGAGACGACGG
1852	ACCACGTCTCACACCGCTGCTGCTGCTGCTGCTGGAGTTTTAGAGCTAGAAATAGCAAGTTAAAATAAGGCTAGTCCGTTATCAACTTGAAAAACTGGCACCGAGTCGGTGCTTTTTTACCATGGTACCTCCTCCAGCTTCTGCTGGAGGGCGAGGTTTGGAGACGACGG
1853	ACCACGTCTCACACCGCTGCTGCTGCTGCTGCTGGAGTTTTAGAGCTAGAAATAGCAAGTTAAAATAAGGCTAGTCCGTTATCAACTTGAAAAACTGGCACCGAGTCGGTGCTTTTTTACCATGTGACCTCCTCCTGCCGCTGCTGGGCGGCCAGGTTTGGAGACGACGG
1854	ACCACGTCTCACACCGCTGCTGCTGCTGCTGCTGGAGTTTTAGAGCTAGAAATAGCAAGTTAAAATAAGGCTAGTCCGTTATCAACTTGAAAAACTGGCACCGAGTCGGTGCTTTTTTACCATTACACCTCCTCCTGCTGCTCCTGGGGGGACCAGTTTGGAGACGACGG
1855	ACCACGTCTCACACCGCTGCTGCTGCTGCTGCTGGAGTTTTAGAGCTAGAAATAGCAAGTTAAAATAAGGCTAGTCCGTTATCAACTTGAAAAACTGGCACCGAGTCGGTGCTTTTTTACCATTAGACCTCCTCCTGCTGCTGCTGCTGGGAGCCGTTTGGAGACGACGG
1856	ACCACGTCTCACACCGCTGCTGCTGCTGCTGCTGGAGTTTTAGAGCTAGAAATAGCAAGTTAAAATAAGGCTAGTCCGTTATCAACTTGAAAAACTGGCACCGAGTCGGTGCTTTTTTACCATTATACCTCCTCCTGCTGGTGCGGGACGGGGGGGTTTGGAGACGACGG
1857	ACCACGTCTCACACCGCTGCTGCTGCTGCTGCTGGAGTTTTAGAGCTAGAAATAGCAAGTTAAAATAAGGCTAGTCCGTTATCAACTTGAAAAACTGGCACCGAGTCGGTGCTTTTTTACCATTCGACCTCCTGCTCCTGCGGCTGGCTGGTGGGGTTTGGAGACGACGG
1858	ACCACGTCTCACACCGCTGCTGCTGCTGCTGCTGGAGTTTTAGAGCTAGAAATAGCAAGTTAAAATAAGGCTAGTCCGTTATCAACTTGAAAAACTGGCACCGAGTCGGTGCTTTTTTACCGAACAACCTCCTGCTCCTGCTGCTGAGTGGTGACGTTTGGAGACGACGG
1859	ACCACGTCTCACACCGCTGCTGCTGCTGCTGCTGGAGTTTTAGAGCTAGAAATAGCAAGTTAAAATAAGGCTAGTCCGTTATCAACTTGAAAAACTGGCACCGAGTCGGTGCTTTTTTACCGAACTACCTCCTGCTCGTGCTGCTGGCAGGCAGTGTTTGGAGACGACGG
1860	ACCACGTCTCACACCGCTGCTGCTGCTGCTGCTGGAGTTTTAGAGCTAGAAATAGCAAGTTAAAATAAGGCTAGTCCGTTATCAACTTGAAAAACTGGCACCGAGTCGGTGCTTTTTTACCGAAGCACCTCCTGCTGCCTCTGCTGAAGGGCATAGTTTGGAGACGACGG
1861	ACCACGTCTCACACCGCTGCTGCTGCTGCTGCTGGAGTTTTAGAGCTAGAAATAGCAAGTTAAAATAAGGCTAGTCCGTTATCAACTTGAAAAACTGGCACCGAGTCGGTGCTTTTTTACCGAAGTACCTCCTGCTGCTGCTGCTCAGAGGCAAGGTTTGGAGACGACGG
1862	ACCACGTCTCACACCGCTGCTGCTGCTGCTGCTGGAGTTTTAGAGCTAGAAATAGCAAGTTAAAATAAGGCTAGTCCGTTATCAACTTGAAAAACTGGCACCGAGTCGGTGCTTTTTTACCGAATAACCTCCTGCTGCTGCTGGTCCAGGGGGTGGTTTGGAGACGACGG
1863	ACCACGTCTCACACCGCTGCTGCTGCTGCTGCTGGAGTTTTAGAGCTAGAAATAGCAAGTTAAAATAAGGCTAGTCCGTTATCAACTTGAAAAACTGGCACCGAGTCGGTGCTTTTTTACCGAATTACCTCCTGCTGCTGGGCCTGGATGGCCCCGTTTGGAGACGACGG
1864	ACCACGTCTCACACCGCTGCTGCTGCTGCTGCTGGAGTTTTAGAGCTAGAAATAGCAAGTTAAAATAAGGCTAGTCCGTTATCAACTTGAAAAACTGGCACCGAGTCGGTGCTTTTTTACCGACATACCTCCTGCTGGAGCTGCTGGAGGGCCCCGTTTGGAGACGACGG
1865	ACCACGTCTCACACCGCTGCTGCTGCTGCTGCTGGAGTTTTAGAGCTAGAAATAGCAAGTTAAAATAAGGCTAGTCCGTTATCAACTTGAAAAACTGGCACCGAGTCGGTGCTTTTTTACCGACCAACCTCCTGCTGGTGCTGTGGGAGGGCCTGGTTTGGAGACGACGG
1866	ACCACGTCTCACACCGCTGCTGCTGCTGCTGCTGGAGTTTTAGAGCTAGAAATAGCAAGTTAAAATAAGGCTAGTCCGTTATCAACTTGAAAAACTGGCACCGAGTCGGTGCTTTTTTACCGACCTACCTCCTTCTGCATCTGCTGGAAGGAGAAGTTTGGAGACGACGG
1867	ACCACGTCTCACACCGCTGCTGCTGCTGCTGCTGGAGTTTTAGAGCTAGAAATAGCAAGTTAAAATAAGGCTAGTCCGTTATCAACTTGAAAAACTGGCACCGAGTCGGTGCTTTTTTACCGACGAACCTCCTTCTGCGGCTGCTGGGAGGTGGCGTTTGGAGACGACGG
1868	ACCACGTCTCACACCGCTGCTGCTGCTGCTGCTGGAGTTTTAGAGCTAGAAATAGCAAGTTAAAATAAGGCTAGTCCGTTATCAACTTGAAAAACTGGCACCGAGTCGGTGCTTTTTTACCGACTCACCTCTTGCTGCTCCTGCTGCAGGGGGAGGTTTGGAGACGACGG
1869	ACCACGTCTCACACCGCTGCTGCTGCTGCTGCTGGAGTTTTAGAGCTAGAAATAGCAAGTTAAAATAAGGCTAGTCCGTTATCAACTTGAAAAACTGGCACCGAGTCGGTGCTTTTTTACCGACTTACCTCTTGCTGCTGCTGCTGGCTGGGCTGGTTTGGAGACGACGG
1870	ACCACGTCTCACACCGCTGCTGCTGCTGCTGCTGGAGTTTTAGAGCTAGAAATAGCAAGTTAAAATAAGGCTAGTCCGTTATCAACTTGAAAAACTGGCACCGAGTCGGTGCTTTTTTACCGAGAGACCTGATACTGCTACTGCTGGTTGGTGGTGTTTGGAGACGACGG
1871	ACCACGTCTCACACCGCTGCTGCTGCTGCTGCTGGAGTTTTAGAGCTAGAAATAGCAAGTTAAAATAAGGCTAGTCCGTTATCAACTTGAAAAACTGGCACCGAGTCGGTGCTTTTTTACCGAGCGACCTGATGCTGCGGCTGTTGGGAGGGGGTGTTTGGAGACGACGG
1872	ACCACGTCTCACACCGCTGCTGCTGCTGCTGCTGGAGTTTTAGAGCTAGAAATAGCAAGTTAAAATAAGGCTAGTCCGTTATCAACTTGAAAAACTGGCACCGAGTCGGTGCTTTTTTACCGAGGTACCTGATGCTGCTGCTGGCGGCGGGCGACGTTTGGAGACGACGG
1873	ACCACGTCTCACACCGCTGCTGCTGCTGCTGCTGGAGTTTTAGAGCTAGAAATAGCAAGTTAAAATAAGGCTAGTCCGTTATCAACTTGAAAAACTGGCACCGAGTCGGTGCTTTTTTACCGATCCACCTGCAGATGCTGCTGGTTGAGGGTTATGTTTGGAGACGACGG
1874	ACCACGTCTCACACCGCTGCTGCTGCTGCTGCTGGAGTTTTAGAGCTAGAAATAGCAAGTTAAAATAAGGCTAGTCCGTTATCAACTTGAAAAACTGGCACCGAGTCGGTGCTTTTTTACCGATCTACCTGCAGCAGCTGTTTCTGGAGGGCTTGGTTTGGAGACGACGG
1875	ACCACGTCTCACACCGCTGCTGCTGCTGCTGCTGGAGTTTTAGAGCTAGAAATAGCAAGTTAAAATAAGGCTAGTCCGTTATCAACTTGAAAAACTGGCACCGAGTCGGTGCTTTTTTACCGATGAACCTGCAGCCACTGCTCCTGGAGGGCCAGGTTTGGAGACGACGG
1876	ACCACGTCTCACACCGCTGCTGCTGCTGCTGCTGGAGTTTTAGAGCTAGAAATAGCAAGTTAAAATAAGGCTAGTCCGTTATCAACTTGAAAAACTGGCACCGAGTCGGTGCTTTTTTACCGATGCACCTGCAGCCCCTGCTTCTGGAGGGACACGTTTGGAGACGACGG
1877	ACCACGTCTCACACCGCTGCTGCTGCTGCTGCTGGAGTTTTAGAGCTAGAAATAGCAAGTTAAAATAAGGCTAGTCCGTTATCAACTTGAAAAACTGGCACCGAGTCGGTGCTTTTTTACCGATTAACCTGCAGCGGCTTCTGCTGGAAGGGTCGGTTTGGAGACGACGG
1878	ACCACGTCTCACACCGCTGCTGCTGCTGCTGCTGGAGTTTTAGAGCTAGAAATAGCAAGTTAAAATAAGGCTAGTCCGTTATCAACTTGAAAAACTGGCACCGAGTCGGTGCTTTTTTACCGATTCACCTGCAGCTCCAGCAGCTGGAGGGCGAAGTTTGGAGACGACGG
1879	ACCACGTCTCACACCGCTGCTGCTGCTGCTGCTGGAGTTTTAGAGCTAGAAATAGCAAGTTAAAATAAGGCTAGTCCGTTATCAACTTGAAAAACTGGCACCGAGTCGGTGCTTTTTTACCGCAGTACCTGCAGCTGCTGCACCTGGCAGGTGAGGTTTGGAGACGACGG
1880	ACCACGTCTCACACCGCTGCTGCTGCTGCTGCTGGAGTTTTAGAGCTAGAAATAGCAAGTTAAAATAAGGCTAGTCCGTTATCAACTTGAAAAACTGGCACCGAGTCGGTGCTTTTTTACCGCATAACCTGCAGCTGCTGCTCTAGGAGGGTAGCGTTTGGAGACGACGG
1881	ACCACGTCTCACACCGCTGCTGCTGCTGCTGCTGGAGTTTTAGAGCTAGAAATAGCAAGTTAAAATAAGGCTAGTCCGTTATCAACTTGAAAAACTGGCACCGAGTCGGTGCTTTTTTACCGCATGACCTGCAGCTGCTGCTGATTGTGGGCTGCGTTTGGAGACGACGG
1882	ACCACGTCTCACACCGCTGCTGCTGCTGCTGCTGGAGTTTTAGAGCTAGAAATAGCAAGTTAAAATAAGGCTAGTCCGTTATCAACTTGAAAAACTGGCACCGAGTCGGTGCTTTTTTACCGCCATACCTGCAGCTGCTGCTGCTCGGAGGGCTGGTTTGGAGACGACGG
1883	ACCACGTCTCACACCGCTGCTGCTGCTGCTGCTGGAGTTTTAGAGCTAGAAATAGCAAGTTAAAATAAGGCTAGTCCGTTATCAACTTGAAAAACTGGCACCGAGTCGGTGCTTTTTTACCGCGACACCTGCAGCTGGTACAGCTGGATGGCCTCGTTTGGAGACGACGG
1884	ACCACGTCTCACACCGCTGCTGCTGCTGCTGCTGGAGTTTTAGAGCTAGAAATAGCAAGTTAAAATAAGGCTAGTCCGTTATCAACTTGAAAAACTGGCACCGAGTCGGTGCTTTTTTACCGCGCTACCTGCAGGTGCTGCGCCTGGACGGGAACGTTTGGAGACGACGG
1885	ACCACGTCTCACACCGCTGCTGCTGCTGCTGCTGGAGTTTTAGAGCTAGAAATAGCAAGTTAAAATAAGGCTAGTCCGTTATCAACTTGAAAAACTGGCACCGAGTCGGTGCTTTTTTACCGCGTAACCTGCCACTGATGCTGCTGGTAGGTGGCGTTTGGAGACGACGG
1886	ACCACGTCTCACACCGCTGCTGCTGCTGCTGCTGGAGTTTTAGAGCTAGAAATAGCAAGTTAAAATAAGGCTAGTCCGTTATCAACTTGAAAAACTGGCACCGAGTCGGTGCTTTTTTACCGCGTCACCTGCCACTGCTGCTGCCAGAAGGATGAGTTTGGAGACGACGG
1887	ACCACGTCTCACACCGCTGCTGCTGCTGCTGCTGGAGTTTTAGAGCTAGAAATAGCAAGTTAAAATAAGGCTAGTCCGTTATCAACTTGAAAAACTGGCACCGAGTCGGTGCTTTTTTACCGCTAGACCTGCCATTGCTGCTGCTGAATGGAAGGGTTTGGAGACGACGG
1888	ACCACGTCTCACACCGCTGCTGCTGCTGCTGCTGGAGTTTTAGAGCTAGAAATAGCAAGTTAAAATAAGGCTAGTCCGTTATCAACTTGAAAAACTGGCACCGAGTCGGTGCTTTTTTACCGCTATACCTGCCCCTGCTGCAGGTGGATGGGTGGGTTTGGAGACGACGG
1889	ACCACGTCTCACACCGCTGCTGCTGCTGCTGCTGGAGTTTTAGAGCTAGAAATAGCAAGTTAAAATAAGGCTAGTCCGTTATCAACTTGAAAAACTGGCACCGAGTCGGTGCTTTTTTACCGCTCTACCTGCCCTTGCTGCTGCTGGTCGGGCACGTTTGGAGACGACGG
1890	ACCACGTCTCACACCGCTGCTGCTGCTGCTGCTGGAGTTTTAGAGCTAGAAATAGCAAGTTAAAATAAGGCTAGTCCGTTATCAACTTGAAAAACTGGCACCGAGTCGGTGCTTTTTTACCGCTGAACCTGCCGCTACTGCCGCTGCAGGGAAAAGTTTGGAGACGACGG
1891	ACCACGTCTCACACCGCTGCTGCTGCTGCTGCTGGAGTTTTAGAGCTAGAAATAGCAAGTTAAAATAAGGCTAGTCCGTTATCAACTTGAAAAACTGGCACCGAGTCGGTGCTTTTTTACCGCTTAACCTGCCGCTGCTGCCCCCGGACGGCTCCGTTTGGAGACGACGG
1892	ACCACGTCTCACACCGCTGCTGCTGCTGCTGCTGGAGTTTTAGAGCTAGAAATAGCAAGTTAAAATAAGGCTAGTCCGTTATCAACTTGAAAAACTGGCACCGAGTCGGTGCTTTTTTACCGCTTCACCTGCCGCTGCTGCTGCTGCCTGGGGGCGTTTGGAGACGACGG
1893	ACCACGTCTCACACCGCTGCTGCTGCTGCTGCTGGAGTTTTAGAGCTAGAAATAGCAAGTTAAAATAAGGCTAGTCCGTTATCAACTTGAAAAACTGGCACCGAGTCGGTGCTTTTTTACCGGAACACCTGCCGCTGCTGCTGCTGCGGGGGTCGGTTTGGAGACGACGG
1894	ACCACGTCTCACACCGCTGCTGCTGCTGCTGCTGGAGTTTTAGAGCTAGAAATAGCAAGTTAAAATAAGGCTAGTCCGTTATCAACTTGAAAAACTGGCACCGAGTCGGTGCTTTTTTACCGGAAGACCTGCCGCTGTTGCTGCTGCTCGGCCTGGTTTGGAGACGACGG
1895	ACCACGTCTCACACCGCTGCTGCTGCTGCTGCTGGAGTTTTAGAGCTAGAAATAGCAAGTTAAAATAAGGCTAGTCCGTTATCAACTTGAAAAACTGGCACCGAGTCGGTGCTTTTTTACCGGACAACCTGCGGCAGCTGCTGCTGCTGGGGCAGGTTTGGAGACGACGG
1896	ACCACGTCTCACACCGCTGCTGCTGCTGCTGCTGGAGTTTTAGAGCTAGAAATAGCAAGTTAAAATAAGGCTAGTCCGTTATCAACTTGAAAAACTGGCACCGAGTCGGTGCTTTTTTACCGGACGACCTGCGGCCGCTGCCCCTGGACGGTCCCGTTTGGAGACGACGG
1897	ACCACGTCTCACACCGCTGCTGCTGCTGCTGCTGGAGTTTTAGAGCTAGAAATAGCAAGTTAAAATAAGGCTAGTCCGTTATCAACTTGAAAAACTGGCACCGAGTCGGTGCTTTTTTACCGGACTACCTGCGGCTGCGGCTCCTGGCAGGGCCCGTTTGGAGACGACGG
1898	ACCACGTCTCACACCGCTGCTGCTGCTGCTGCTGGAGTTTTAGAGCTAGAAATAGCAAGTTAAAATAAGGCTAGTCCGTTATCAACTTGAAAAACTGGCACCGAGTCGGTGCTTTTTTACCGGAGCACCTGCGGCTGCTCCTGCTGCTGGGGGGAGTTTGGAGACGACGG
1899	ACCACGTCTCACACCGCTGCTGCTGCTGCTGCTGGAGTTTTAGAGCTAGAAATAGCAAGTTAAAATAAGGCTAGTCCGTTATCAACTTGAAAAACTGGCACCGAGTCGGTGCTTTTTTACCGGATAACCTGCGGCTGGGGCTGCTGGCCGGCGCCGTTTGGAGACGACGG
1900	ACCACGTCTCACACCGCTGCTGCTGCTGCTGCTGGAGTTTTAGAGCTAGAAATAGCAAGTTAAAATAAGGCTAGTCCGTTATCAACTTGAAAAACTGGCACCGAGTCGGTGCTTTTTTACCGGATCACCTGCGGCTGGTGCAGCTGGCCGGGGCGGTTTGGAGACGACGG
1901	ACCACGTCTCACACCGCTGCTGCTGCTGCTGCTGGAGTTTTAGAGCTAGAAATAGCAAGTTAAAATAAGGCTAGTCCGTTATCAACTTGAAAAACTGGCACCGAGTCGGTGCTTTTTTACCGGATTACCTGCGGGAGCTGCTGCTGGACGGCGGGGTTTGGAGACGACGG
1902	ACCACGTCTCACACCGCTGCTGCTGCTGCTGCTGGAGTTTTAGAGCTAGAAATAGCAAGTTAAAATAAGGCTAGTCCGTTATCAACTTGAAAAACTGGCACCGAGTCGGTGCTTTTTTACCGGCAGACCTGCGGTTGCTGCTGCGGGTGGGAGCTGTTTGGAGACGACGG
1903	ACCACGTCTCACACCGCTGCTGCTGCTGCTGCTGGAGTTTTAGAGCTAGAAATAGCAAGTTAAAATAAGGCTAGTCCGTTATCAACTTGAAAAACTGGCACCGAGTCGGTGCTTTTTTACCGGCGAACCTGCTACTGCTGCTGCTGGTAGGGTTGGTTTGGAGACGACGG
1904	ACCACGTCTCACACCGCTGCTGCTGCTGCTGCTGGAGTTTTAGAGCTAGAAATAGCAAGTTAAAATAAGGCTAGTCCGTTATCAACTTGAAAAACTGGCACCGAGTCGGTGCTTTTTTACCGGCGCACCTGCTACTGCTGGTGCTGGGCGGCTGCGTTTGGAGACGACGG
1905	ACCACGTCTCACACCGCTGCTGCTGCTGCTGCTGGAGTTTTAGAGCTAGAAATAGCAAGTTAAAATAAGGCTAGTCCGTTATCAACTTGAAAAACTGGCACCGAGTCGGTGCTTTTTTACCGGCGTACCTGCTACTTCTGCATCTGGAAGGGGGTGTTTGGAGACGACGG
1907	ACCACGTCTCACACCGCTGCTGCTGCTGCTGCTGGAGTTTTAGAGCTAGAAATAGCAAGTTAAAATAAGGCTAGTCCGTTATCAACTTGAAAAACTGGCACCGAGTCGGTGCTTTTTTACCGGTCGACCTGCTCCTCCTGCTGCTTGTCGGATACGTTTGGAGACGACGG
1908	ACCACGTCTCACACCGCTGCTGCTGCTGCTGCTGGAGTTTTAGAGCTAGAAATAGCAAGTTAAAATAAGGCTAGTCCGTTATCAACTTGAAAAACTGGCACCGAGTCGGTGCTTTTTTACCGGTCTACCTGCTCCTGCAGGCGCTGGATGGCCAGGTTTGGAGACGACGG
1909	ACCACGTCTCACACCGCTGCTGCTGCTGCTGCTGGAGTTTTAGAGCTAGAAATAGCAAGTTAAAATAAGGCTAGTCCGTTATCAACTTGAAAAACTGGCACCGAGTCGGTGCTTTTTTACCGGTGAACCTGCTCCTGCTCCTGCTGCTTGGGGCTGTTTGGAGACGACGG
1910	ACCACGTCTCACACCGCTGCTGCTGCTGCTGCTGGAGTTTTAGAGCTAGAAATAGCAAGTTAAAATAAGGCTAGTCCGTTATCAACTTGAAAAACTGGCACCGAGTCGGTGCTTTTTTACCGGTGCACCTGCTCCTGCTGCAGCCGGTGGGCGAGGTTTGGAGACGACGG
1911	ACCACGTCTCACACCGCTGCTGCTGCTGCTGCTGGAGTTTTAGAGCTAGAAATAGCAAGTTAAAATAAGGCTAGTCCGTTATCAACTTGAAAAACTGGCACCGAGTCGGTGCTTTTTTACCGGTGGACCTGCTCCTGCTGCAGCTGTATGGCCCAGTTTGGAGACGACGG
1912	ACCACGTCTCACACCGCTGCTGCTGCTGCTGCTGGAGTTTTAGAGCTAGAAATAGCAAGTTAAAATAAGGCTAGTCCGTTATCAACTTGAAAAACTGGCACCGAGTCGGTGCTTTTTTACCGGTGTACCTGCTCCTGCTGCTACTGACGGGGCCCGTTTGGAGACGACGG
1913	ACCACGTCTCACACCGCTGCTGCTGCTGCTGCTGGAGTTTTAGAGCTAGAAATAGCAAGTTAAAATAAGGCTAGTCCGTTATCAACTTGAAAAACTGGCACCGAGTCGGTGCTTTTTTACCGGTTCACCTGCTCCTGCTGGGGGTGGAGGGTGCCGTTTGGAGACGACGG
1914	ACCACGTCTCACACCGCTGCTGCTGCTGCTGCTGGAGTTTTAGAGCTAGAAATAGCAAGTTAAAATAAGGCTAGTCCGTTATCAACTTGAAAAACTGGCACCGAGTCGGTGCTTTTTTACCGTAACACCTGCTCCTGTAGCTGCCGGATGGTGCTGTTTGGAGACGACGG
1915	ACCACGTCTCACACCGCTGCTGCTGCTGCTGCTGGAGTTTTAGAGCTAGAAATAGCAAGTTAAAATAAGGCTAGTCCGTTATCAACTTGAAAAACTGGCACCGAGTCGGTGCTTTTTTACCGTACCACCTGCTGACGCTGCTGCTGCCCGGCCTCGTTTGGAGACGACGG
1916	ACCACGTCTCACACCGCTGCTGCTGCTGCTGCTGGAGTTTTAGAGCTAGAAATAGCAAGTTAAAATAAGGCTAGTCCGTTATCAACTTGAAAAACTGGCACCGAGTCGGTGCTTTTTTACCGTACGACCTGCTGAGCCTGCTGCTGCAAGGTAGGGTTTGGAGACGACGG
1917	ACCACGTCTCACACCGCTGCTGCTGCTGCTGCTGGAGTTTTAGAGCTAGAAATAGCAAGTTAAAATAAGGCTAGTCCGTTATCAACTTGAAAAACTGGCACCGAGTCGGTGCTTTTTTACCGTAGCACCTGCTGATGCTGCAGCTGCTGGGATGCGTTTGGAGACGACGG
1918	ACCACGTCTCACACCGCTGCTGCTGCTGCTGCTGGAGTTTTAGAGCTAGAAATAGCAAGTTAAAATAAGGCTAGTCCGTTATCAACTTGAAAAACTGGCACCGAGTCGGTGCTTTTTTACCGTAGTACCTGCTGATGCTGCTGCTGCAGGGCGCCGTTTGGAGACGACGG
1919	ACCACGTCTCACACCGCTGCTGCTGCTGCTGCTGGAGTTTTAGAGCTAGAAATAGCAAGTTAAAATAAGGCTAGTCCGTTATCAACTTGAAAAACTGGCACCGAGTCGGTGCTTTTTTACCGTCCTACCTGCTGCAGAGGGTGCTGGAAGGCTTTGTTTGGAGACGACGG
1920	ACCACGTCTCACACCGCTGCTGCTGCTGCTGCTGGAGTTTTAGAGCTAGAAATAGCAAGTTAAAATAAGGCTAGTCCGTTATCAACTTGAAAAACTGGCACCGAGTCGGTGCTTTTTTACCGTCGTACCTGCTGCAGCAGCTGCTCGCTGGGCCGGTTTGGAGACGACGG
1921	ACCACGTCTCACACCGCTGCTGCTGCTGCTGCTGGAGTTTTAGAGCTAGAAATAGCAAGTTAAAATAAGGCTAGTCCGTTATCAACTTGAAAAACTGGCACCGAGTCGGTGCTTTTTTACCGTGACACCTGCTGCAGCTCCTGCCGCAAGGTGTCGTTTGGAGACGACGG
1922	ACCACGTCTCACACCGCTGCTGCTGCTGCTGCTGGAGTTTTAGAGCTAGAAATAGCAAGTTAAAATAAGGCTAGTCCGTTATCAACTTGAAAAACTGGCACCGAGTCGGTGCTTTTTTACCGTGATACCTGCTGCAGCTGCTCCGTGACGGCATAGTTTGGAGACGACGG
1923	ACCACGTCTCACACCGCTGCTGCTGCTGCTGCTGGAGTTTTAGAGCTAGAAATAGCAAGTTAAAATAAGGCTAGTCCGTTATCAACTTGAAAAACTGGCACCGAGTCGGTGCTTTTTTACCGTGCGACCTGCTGCAGCTGCTGCTGCCGGGGCAGGTTTGGAGACGACGG
1924	ACCACGTCTCACACCGCTGCTGCTGCTGCTGCTGGAGTTTTAGAGCTAGAAATAGCAAGTTAAAATAAGGCTAGTCCGTTATCAACTTGAAAAACTGGCACCGAGTCGGTGCTTTTTTACCGTGCTACCTGCTGCAGCTGCTGCTGCTCGGAGGGGTTTGGAGACGACGG
1925	ACCACGTCTCACACCGCTGCTGCTGCTGCTGCTGGAGTTTTAGAGCTAGAAATAGCAAGTTAAAATAAGGCTAGTCCGTTATCAACTTGAAAAACTGGCACCGAGTCGGTGCTTTTTTACCGTGGAACCTGCTGCAGCTGCTGCTGCTGGGGAAAGTTTGGAGACGACGG
1926	ACCACGTCTCACACCGCTGCTGCTGCTGCTGCTGGAGTTTTAGAGCTAGAAATAGCAAGTTAAAATAAGGCTAGTCCGTTATCAACTTGAAAAACTGGCACCGAGTCGGTGCTTTTTTACCGTGTAACCTGCTGCAGCTGGTGCTGGTTGGGGCCGTTTGGAGACGACGG
1927	ACCACGTCTCACACCGCTGCTGCTGCTGCTGCTGGAGTTTTAGAGCTAGAAATAGCAAGTTAAAATAAGGCTAGTCCGTTATCAACTTGAAAAACTGGCACCGAGTCGGTGCTTTTTTACCGTGTTACCTGCTGCATCTGCTGCTCCAGGGACAGGTTTGGAGACGACGG
1928	ACCACGTCTCACACCGCTGCTGCTGCTGCTGCTGGAGTTTTAGAGCTAGAAATAGCAAGTTAAAATAAGGCTAGTCCGTTATCAACTTGAAAAACTGGCACCGAGTCGGTGCTTTTTTACCGTTAGACCTGCTGCCACTCCTGCTGGAGGGTGAAGTTTGGAGACGACGG
1929	ACCACGTCTCACACCGCTGCTGCTGCTGCTGCTGGAGTTTTAGAGCTAGAAATAGCAAGTTAAAATAAGGCTAGTCCGTTATCAACTTGAAAAACTGGCACCGAGTCGGTGCTTTTTTACCGTTATACCTGCTGCCACTGCTGCTGTCAGGCCACGTTTGGAGACGACGG
1930	ACCACGTCTCACACCGCTGCTGCTGCTGCTGCTGGAGTTTTAGAGCTAGAAATAGCAAGTTAAAATAAGGCTAGTCCGTTATCAACTTGAAAAACTGGCACCGAGTCGGTGCTTTTTTACCGTTCGACCTGCTGCCGCTGCCGCTGCCGGGCAGGGTTTGGAGACGACGG
1931	ACCACGTCTCACACCGCTGCTGCTGCTGCTGCTGGAGTTTTAGAGCTAGAAATAGCAAGTTAAAATAAGGCTAGTCCGTTATCAACTTGAAAAACTGGCACCGAGTCGGTGCTTTTTTACCGTTGCACCTGCTGCCGCTGCTGCTGGCGGGGCCTGTTTGGAGACGACGG
1932	ACCACGTCTCACACCGCTGCTGCTGCTGCTGCTGGAGTTTTAGAGCTAGAAATAGCAAGTTAAAATAAGGCTAGTCCGTTATCAACTTGAAAAACTGGCACCGAGTCGGTGCTTTTTTACCGTTGGACCTGCTGCCGCTGCTTCTGTGAGGGGCAGTTTGGAGACGACGG
1933	ACCACGTCTCACACCGCTGCTGCTGCTGCTGCTGGAGTTTTAGAGCTAGAAATAGCAAGTTAAAATAAGGCTAGTCCGTTATCAACTTGAAAAACTGGCACCGAGTCGGTGCTTTTTTACCGTTGTACCTGCTGCGACGCCTGCTGGACGGCGTGGTTTGGAGACGACGG
1934	ACCACGTCTCACACCGCTGCTGCTGCTGCTGCTGGAGTTTTAGAGCTAGAAATAGCAAGTTAAAATAAGGCTAGTCCGTTATCAACTTGAAAAACTGGCACCGAGTCGGTGCTTTTTTACCTAACAACCTGCTGCGGCGGCTGCTGGATGGTTGCGTTTGGAGACGACGG
1935	ACCACGTCTCACACCGCTGCTGCTGCTGCTGCTGGAGTTTTAGAGCTAGAAATAGCAAGTTAAAATAAGGCTAGTCCGTTATCAACTTGAAAAACTGGCACCGAGTCGGTGCTTTTTTACCTAAGCACCTGCTGCGGCTGCTCCTGCTGGGGGCGGTTTGGAGACGACGG
1936	ACCACGTCTCACACCGCTGCTGCTGCTGCTGCTGGAGTTTTAGAGCTAGAAATAGCAAGTTAAAATAAGGCTAGTCCGTTATCAACTTGAAAAACTGGCACCGAGTCGGTGCTTTTTTACCTAAGGACCTGCTGCGGCTGCTGACAGATGGTGCTGTTTGGAGACGACGG
1937	ACCACGTCTCACACCGCTGCTGCTGCTGCTGCTGGAGTTTTAGAGCTAGAAATAGCAAGTTAAAATAAGGCTAGTCCGTTATCAACTTGAAAAACTGGCACCGAGTCGGTGCTTTTTTACCTAATCACCTGCTGCGGCTGCTGAGGGAGGGGCGCGTTTGGAGACGACGG
1938	ACCACGTCTCACACCGCTGCTGCTGCTGCTGCTGGAGTTTTAGAGCTAGAAATAGCAAGTTAAAATAAGGCTAGTCCGTTATCAACTTGAAAAACTGGCACCGAGTCGGTGCTTTTTTACCTAATGACCTGCTGCGGCTGCTGCTCTCCGGCCTCGTTTGGAGACGACGG
1939	ACCACGTCTCACACCGCTGCTGCTGCTGCTGCTGGAGTTTTAGAGCTAGAAATAGCAAGTTAAAATAAGGCTAGTCCGTTATCAACTTGAAAAACTGGCACCGAGTCGGTGCTTTTTTACCTACACACCTGCTGCTAATGCTGCTTAAAGGCCAGGTTTGGAGACGACGG
1940	ACCACGTCTCACACCGCTGCTGCTGCTGCTGCTGGAGTTTTAGAGCTAGAAATAGCAAGTTAAAATAAGGCTAGTCCGTTATCAACTTGAAAAACTGGCACCGAGTCGGTGCTTTTTTACCTACCAACCTGCTGCTACTGCTGGTTCAGGGACCAGTTTGGAGACGACGG
1941	ACCACGTCTCACACCGCTGCTGCTGCTGCTGCTGGAGTTTTAGAGCTAGAAATAGCAAGTTAAAATAAGGCTAGTCCGTTATCAACTTGAAAAACTGGCACCGAGTCGGTGCTTTTTTACCTACGCACCTGCTGCTACTGTTGCTGTCAGGGTCAGTTTGGAGACGACGG
1942	ACCACGTCTCACACCGCTGCTGCTGCTGCTGCTGGAGTTTTAGAGCTAGAAATAGCAAGTTAAAATAAGGCTAGTCCGTTATCAACTTGAAAAACTGGCACCGAGTCGGTGCTTTTTTACCTACGGACCTGCTGCTATTGCTGCTGCTTGGGGAAGTTTGGAGACGACGG
1943	ACCACGTCTCACACCGCTGCTGCTGCTGCTGCTGGAGTTTTAGAGCTAGAAATAGCAAGTTAAAATAAGGCTAGTCCGTTATCAACTTGAAAAACTGGCACCGAGTCGGTGCTTTTTTACCTACTCACCTGCTGCTCCTCCGGCTGGCGGGGATCGTTTGGAGACGACGG
1944	ACCACGTCTCACACCGCTGCTGCTGCTGCTGCTGGAGTTTTAGAGCTAGAAATAGCAAGTTAAAATAAGGCTAGTCCGTTATCAACTTGAAAAACTGGCACCGAGTCGGTGCTTTTTTACCTACTTACCTGCTGCTCCTGATGCTACAAGGAGTTGTTTGGAGACGACGG
1945	ACCACGTCTCACACCGCTGCTGCTGCTGCTGCTGGAGTTTTAGAGCTAGAAATAGCAAGTTAAAATAAGGCTAGTCCGTTATCAACTTGAAAAACTGGCACCGAGTCGGTGCTTTTTTACCTAGAGACCTGCTGCTCCTGCTGCTGACGGGGGTGGTTTGGAGACGACGG
1946	ACCACGTCTCACACCGCTGCTGCTGCTGCTGCTGGAGTTTTAGAGCTAGAAATAGCAAGTTAAAATAAGGCTAGTCCGTTATCAACTTGAAAAACTGGCACCGAGTCGGTGCTTTTTTACCTAGATACCTGCTGCTCCTGCTGTCAGATGGTTCCGTTTGGAGACGACGG
1947	ACCACGTCTCACACCGCTGCTGCTGCTGCTGCTGGAGTTTTAGAGCTAGAAATAGCAAGTTAAAATAAGGCTAGTCCGTTATCAACTTGAAAAACTGGCACCGAGTCGGTGCTTTTTTACCTAGCTACCTGCTGCTCCTGCTGTTGCCGGGGCCCGTTTGGAGACGACGG
1948	ACCACGTCTCACACCGCTGCTGCTGCTGCTGCTGGAGTTTTAGAGCTAGAAATAGCAAGTTAAAATAAGGCTAGTCCGTTATCAACTTGAAAAACTGGCACCGAGTCGGTGCTTTTTTACCTAGGAACCTGCTGCTCGTGCTGCTGGCGGGCGCGGTTTGGAGACGACGG
1949	ACCACGTCTCACACCGCTGCTGCTGCTGCTGCTGGAGTTTTAGAGCTAGAAATAGCAAGTTAAAATAAGGCTAGTCCGTTATCAACTTGAAAAACTGGCACCGAGTCGGTGCTTTTTTACCTAGGCACCTGCTGCTGAAGAGGCTGGAAGGGCGTGTTTGGAGACGACGG
1950	ACCACGTCTCACACCGCTGCTGCTGCTGCTGCTGGAGTTTTAGAGCTAGAAATAGCAAGTTAAAATAAGGCTAGTCCGTTATCAACTTGAAAAACTGGCACCGAGTCGGTGCTTTTTTACCTAGGTACCTGCTGCTGACGCTGCTGGTTGGCTTTGTTTGGAGACGACGG
1951	ACCACGTCTCACACCGCTGCTGCTGCTGCTGCTGGAGTTTTAGAGCTAGAAATAGCAAGTTAAAATAAGGCTAGTCCGTTATCAACTTGAAAAACTGGCACCGAGTCGGTGCTTTTTTACCTATATACCTGCTGCTGATGCGGCTGTGAGGGGCTGTTTGGAGACGACGG
1952	ACCACGTCTCACACCGCTGCTGCTGCTGCTGCTGGAGTTTTAGAGCTAGAAATAGCAAGTTAAAATAAGGCTAGTCCGTTATCAACTTGAAAAACTGGCACCGAGTCGGTGCTTTTTTACCTATCAACCTGCTGCTGATGCTGTAGAAAGGGTGCGTTTGGAGACGACGG
1953	ACCACGTCTCACACCGCTGCTGCTGCTGCTGCTGGAGTTTTAGAGCTAGAAATAGCAAGTTAAAATAAGGCTAGTCCGTTATCAACTTGAAAAACTGGCACCGAGTCGGTGCTTTTTTACCTATCCACCTGCTGCTGATGGTTCAGGAAGGAATGGTTTGGAGACGACGG
1954	ACCACGTCTCACACCGCTGCTGCTGCTGCTGCTGGAGTTTTAGAGCTAGAAATAGCAAGTTAAAATAAGGCTAGTCCGTTATCAACTTGAAAAACTGGCACCGAGTCGGTGCTTTTTTACCTATGTACCTGCTGCTGCAGCCACTGAATGGGAAGGTTTGGAGACGACGG
1955	ACCACGTCTCACACCGCTGCTGCTGCTGCTGCTGGAGTTTTAGAGCTAGAAATAGCAAGTTAAAATAAGGCTAGTCCGTTATCAACTTGAAAAACTGGCACCGAGTCGGTGCTTTTTTACCTATTCACCTGCTGCTGCAGCTGCAAGGTGGCAGTGTTTGGAGACGACGG
1956	ACCACGTCTCACACCGCTGCTGCTGCTGCTGCTGGAGTTTTAGAGCTAGAAATAGCAAGTTAAAATAAGGCTAGTCCGTTATCAACTTGAAAAACTGGCACCGAGTCGGTGCTTTTTTACCTCAATACCTGCTGCTGCAGCTTCAGGCCGGGCCCGTTTGGAGACGACGG
1957	ACCACGTCTCACACCGCTGCTGCTGCTGCTGCTGGAGTTTTAGAGCTAGAAATAGCAAGTTAAAATAAGGCTAGTCCGTTATCAACTTGAAAAACTGGCACCGAGTCGGTGCTTTTTTACCTCACCACCTGCTGCTGCAGGTGCTGGCTGGGCTCGTTTGGAGACGACGG
1958	ACCACGTCTCACACCGCTGCTGCTGCTGCTGCTGGAGTTTTAGAGCTAGAAATAGCAAGTTAAAATAAGGCTAGTCCGTTATCAACTTGAAAAACTGGCACCGAGTCGGTGCTTTTTTACCTCAGGACCTGCTGCTGCCACAGCTGCAAGGACCAGTTTGGAGACGACGG
1959	ACCACGTCTCACACCGCTGCTGCTGCTGCTGCTGGAGTTTTAGAGCTAGAAATAGCAAGTTAAAATAAGGCTAGTCCGTTATCAACTTGAAAAACTGGCACCGAGTCGGTGCTTTTTTACCTCAGTACCTGCTGCTGCCCCAGGTGGAGGGAAGAGTTTGGAGACGACGG
1960	ACCACGTCTCACACCGCTGCTGCTGCTGCTGCTGGAGTTTTAGAGCTAGAAATAGCAAGTTAAAATAAGGCTAGTCCGTTATCAACTTGAAAAACTGGCACCGAGTCGGTGCTTTTTTACCTCATAACCTGCTGCTGCCCCTGCTGCCCGGGCTGGTTTGGAGACGACGG
1961	ACCACGTCTCACACCGCTGCTGCTGCTGCTGCTGGAGTTTTAGAGCTAGAAATAGCAAGTTAAAATAAGGCTAGTCCGTTATCAACTTGAAAAACTGGCACCGAGTCGGTGCTTTTTTACCTCATTACCTGCTGCTGCCGCCGCCGGCCGGGCAGGTTTGGAGACGACGG
1962	ACCACGTCTCACACCGCTGCTGCTGCTGCTGCTGGAGTTTTAGAGCTAGAAATAGCAAGTTAAAATAAGGCTAGTCCGTTATCAACTTGAAAAACTGGCACCGAGTCGGTGCTTTTTTACCTCCAGACCTGCTGCTGCCGCCGCTGCCGGGGTGGGTTTGGAGACGACGG
1963	ACCACGTCTCACACCGCTGCTGCTGCTGCTGCTGGAGTTTTAGAGCTAGAAATAGCAAGTTAAAATAAGGCTAGTCCGTTATCAACTTGAAAAACTGGCACCGAGTCGGTGCTTTTTTACCTCCATACCTGCTGCTGCCGCTGCTCGCAGGTAGGGTTTGGAGACGACGG
1964	ACCACGTCTCACACCGCTGCTGCTGCTGCTGCTGGAGTTTTAGAGCTAGAAATAGCAAGTTAAAATAAGGCTAGTCCGTTATCAACTTGAAAAACTGGCACCGAGTCGGTGCTTTTTTACCTCCGTACCTGCTGCTGCCGCTGCTCTGTGGGGTCGTTTGGAGACGACGG
1965	ACCACGTCTCACACCGCTGCTGCTGCTGCTGCTGGAGTTTTAGAGCTAGAAATAGCAAGTTAAAATAAGGCTAGTCCGTTATCAACTTGAAAAACTGGCACCGAGTCGGTGCTTTTTTACCTCCTTACCTGCTGCTGCGCCTTCTGGATGGTGGTGTTTGGAGACGACGG
1966	ACCACGTCTCACACCGCTGCTGCTGCTGCTGCTGGAGTTTTAGAGCTAGAAATAGCAAGTTAAAATAAGGCTAGTCCGTTATCAACTTGAAAAACTGGCACCGAGTCGGTGCTTTTTTACCTCGACACCTGCTGCTGCGGCGGCTGCGAGGTCTGGTTTGGAGACGACGG
1967	ACCACGTCTCACACCGCTGCTGCTGCTGCTGCTGGAGTTTTAGAGCTAGAAATAGCAAGTTAAAATAAGGCTAGTCCGTTATCAACTTGAAAAACTGGCACCGAGTCGGTGCTTTTTTACCTCGATACCTGCTGCTGCGGCTGCGGCTGGGCCTGGTTTGGAGACGACGG
1968	ACCACGTCTCACACCGCTGCTGCTGCTGCTGCTGGAGTTTTAGAGCTAGAAATAGCAAGTTAAAATAAGGCTAGTCCGTTATCAACTTGAAAAACTGGCACCGAGTCGGTGCTTTTTTACCTCGCGACCTGCTGCTGCGGCTGCTCAGGGGGGATGTTTGGAGACGACGG
1969	ACCACGTCTCACACCGCTGCTGCTGCTGCTGCTGGAGTTTTAGAGCTAGAAATAGCAAGTTAAAATAAGGCTAGTCCGTTATCAACTTGAAAAACTGGCACCGAGTCGGTGCTTTTTTACCTCGTGACCTGCTGCTGCTACTGATCCATGGACCAGTTTGGAGACGACGG
1970	ACCACGTCTCACACCGCTGCTGCTGCTGCTGCTGGAGTTTTAGAGCTAGAAATAGCAAGTTAAAATAAGGCTAGTCCGTTATCAACTTGAAAAACTGGCACCGAGTCGGTGCTTTTTTACCTCTACACCTGCTGCTGCTACTGCTGAGGGGAGCTGTTTGGAGACGACGG
1971	ACCACGTCTCACACCGCTGCTGCTGCTGCTGCTGGAGTTTTAGAGCTAGAAATAGCAAGTTAAAATAAGGCTAGTCCGTTATCAACTTGAAAAACTGGCACCGAGTCGGTGCTTTTTTACCTCTCTACCTGCTGCTGCTAGTGGTGGTGGGAGTTGTTTGGAGACGACGG
1972	ACCACGTCTCACACCGCTGCTGCTGCTGCTGCTGGAGTTTTAGAGCTAGAAATAGCAAGTTAAAATAAGGCTAGTCCGTTATCAACTTGAAAAACTGGCACCGAGTCGGTGCTTTTTTACCTCTGCACCTGCTGCTGCTATTGCTGTCTGGTGAGGTTTGGAGACGACGG
1973	ACCACGTCTCACACCGCTGCTGCTGCTGCTGCTGGAGTTTTAGAGCTAGAAATAGCAAGTTAAAATAAGGCTAGTCCGTTATCAACTTGAAAAACTGGCACCGAGTCGGTGCTTTTTTACCTCTTAACCTGCTGCTGCTCCTGCCGCAGGGCCTGGTTTGGAGACGACGG
1974	ACCACGTCTCACACCGCTGCTGCTGCTGCTGCTGGAGTTTTAGAGCTAGAAATAGCAAGTTAAAATAAGGCTAGTCCGTTATCAACTTGAAAAACTGGCACCGAGTCGGTGCTTTTTTACCTCTTCACCTGCTGCTGCTCCTGCTCTACGGCTGGGTTTGGAGACGACGG
1975	ACCACGTCTCACACCGCTGCTGCTGCTGCTGCTGGAGTTTTAGAGCTAGAAATAGCAAGTTAAAATAAGGCTAGTCCGTTATCAACTTGAAAAACTGGCACCGAGTCGGTGCTTTTTTACCTCTTGACCTGCTGCTGCTCCTGCTCTGGGGCCTGGTTTGGAGACGACGG
1976	ACCACGTCTCACACCGCTGCTGCTGCTGCTGCTGGAGTTTTAGAGCTAGAAATAGCAAGTTAAAATAAGGCTAGTCCGTTATCAACTTGAAAAACTGGCACCGAGTCGGTGCTTTTTTACCTGACAACCTGCTGCTGCTGAAGATGGGTGGTGCAGTTTGGAGACGACGG
1977	ACCACGTCTCACACCGCTGCTGCTGCTGCTGCTGGAGTTTTAGAGCTAGAAATAGCAAGTTAAAATAAGGCTAGTCCGTTATCAACTTGAAAAACTGGCACCGAGTCGGTGCTTTTTTACCTGACTACCTGCTGCTGCTGAAGCTGAGGGGGTGGGTTTGGAGACGACGG
1978	ACCACGTCTCACACCGCTGCTGCTGCTGCTGCTGGAGTTTTAGAGCTAGAAATAGCAAGTTAAAATAAGGCTAGTCCGTTATCAACTTGAAAAACTGGCACCGAGTCGGTGCTTTTTTACCTGAGCACCTGCTGCTGCTGACGCTGATGGGTCTCGTTTGGAGACGACGG
1979	ACCACGTCTCACACCGCTGCTGCTGCTGCTGCTGGAGTTTTAGAGCTAGAAATAGCAAGTTAAAATAAGGCTAGTCCGTTATCAACTTGAAAAACTGGCACCGAGTCGGTGCTTTTTTACCTGAGGACCTGCTGCTGCTGAGGCTGAGGGGGTGGGTTTGGAGACGACGG
1980	ACCACGTCTCACACCGCTGCTGCTGCTGCTGCTGGAGTTTTAGAGCTAGAAATAGCAAGTTAAAATAAGGCTAGTCCGTTATCAACTTGAAAAACTGGCACCGAGTCGGTGCTTTTTTACCTGAGTACCTGCTGCTGCTGATGCTGCTGGGAATCGTTTGGAGACGACGG
1981	ACCACGTCTCACACCGCTGCTGCTGCTGCTGCTGGAGTTTTAGAGCTAGAAATAGCAAGTTAAAATAAGGCTAGTCCGTTATCAACTTGAAAAACTGGCACCGAGTCGGTGCTTTTTTACCTGATAACCTGCTGCTGCTGATGCTTCAAGGTCACGTTTGGAGACGACGG
1982	ACCACGTCTCACACCGCTGCTGCTGCTGCTGCTGGAGTTTTAGAGCTAGAAATAGCAAGTTAAAATAAGGCTAGTCCGTTATCAACTTGAAAAACTGGCACCGAGTCGGTGCTTTTTTACCTGATCACCTGCTGCTGCTGATGGTGGTGGGGACCGTTTGGAGACGACGG
1983	ACCACGTCTCACACCGCTGCTGCTGCTGCTGCTGGAGTTTTAGAGCTAGAAATAGCAAGTTAAAATAAGGCTAGTCCGTTATCAACTTGAAAAACTGGCACCGAGTCGGTGCTTTTTTACCTGATGACCTGCTGCTGCTGATGTTGCTGGGTTTCGTTTGGAGACGACGG
1984	ACCACGTCTCACACCGCTGCTGCTGCTGCTGCTGGAGTTTTAGAGCTAGAAATAGCAAGTTAAAATAAGGCTAGTCCGTTATCAACTTGAAAAACTGGCACCGAGTCGGTGCTTTTTTACCTGATTACCTGCTGCTGCTGCAGCCGGAGGGCCTCGTTTGGAGACGACGG
1985	ACCACGTCTCACACCGCTGCTGCTGCTGCTGCTGGAGTTTTAGAGCTAGAAATAGCAAGTTAAAATAAGGCTAGTCCGTTATCAACTTGAAAAACTGGCACCGAGTCGGTGCTTTTTTACCTGCAGACCTGCTGCTGCTGCAGCTGCAAGGTGGCGTTTGGAGACGACGG
1986	ACCACGTCTCACACCGCTGCTGCTGCTGCTGCTGGAGTTTTAGAGCTAGAAATAGCAAGTTAAAATAAGGCTAGTCCGTTATCAACTTGAAAAACTGGCACCGAGTCGGTGCTTTTTTACCTGCCTACCTGCTGCTGCTGCCACTGTGTGGTGTGGTTTGGAGACGACGG
1987	ACCACGTCTCACACCGCTGCTGCTGCTGCTGCTGGAGTTTTAGAGCTAGAAATAGCAAGTTAAAATAAGGCTAGTCCGTTATCAACTTGAAAAACTGGCACCGAGTCGGTGCTTTTTTACCTGCGTACCTGCTGCTGCTGCCGAGGGAAGGACGAGTTTGGAGACGACGG
1988	ACCACGTCTCACACCGCTGCTGCTGCTGCTGCTGGAGTTTTAGAGCTAGAAATAGCAAGTTAAAATAAGGCTAGTCCGTTATCAACTTGAAAAACTGGCACCGAGTCGGTGCTTTTTTACCTGCTAACCTGCTGCTGCTGCCTTGGGAAGGCCTCGTTTGGAGACGACGG
1989	ACCACGTCTCACACCGCTGCTGCTGCTGCTGCTGGAGTTTTAGAGCTAGAAATAGCAAGTTAAAATAAGGCTAGTCCGTTATCAACTTGAAAAACTGGCACCGAGTCGGTGCTTTTTTACCTGCTCACCTGCTGCTGCTGCGGCAGGTGGGGGCAGTTTGGAGACGACGG
1990	ACCACGTCTCACACCGCTGCTGCTGCTGCTGCTGGAGTTTTAGAGCTAGAAATAGCAAGTTAAAATAAGGCTAGTCCGTTATCAACTTGAAAAACTGGCACCGAGTCGGTGCTTTTTTACCTGCTTACCTGCTGCTGCTGCTAATGCTAGGTAAGGTTTGGAGACGACGG
1991	ACCACGTCTCACACCGCTGCTGCTGCTGCTGCTGGAGTTTTAGAGCTAGAAATAGCAAGTTAAAATAAGGCTAGTCCGTTATCAACTTGAAAAACTGGCACCGAGTCGGTGCTTTTTTACCTGGAGACCTGCTGCTGCTGCTACCACAGGGGAAAGTTTGGAGACGACGG
1992	ACCACGTCTCACACCGCTGCTGCTGCTGCTGCTGGAGTTTTAGAGCTAGAAATAGCAAGTTAAAATAAGGCTAGTCCGTTATCAACTTGAAAAACTGGCACCGAGTCGGTGCTTTTTTACCTGGCAACCTGCTGCTGCTGCTACTGCAGGGCTGAGTTTGGAGACGACGG
1993	ACCACGTCTCACACCGCTGCTGCTGCTGCTGCTGGAGTTTTAGAGCTAGAAATAGCAAGTTAAAATAAGGCTAGTCCGTTATCAACTTGAAAAACTGGCACCGAGTCGGTGCTTTTTTACCTGGTCACCTGCTGCTGCTGCTAGAGCAAGGCTTCGTTTGGAGACGACGG
1994	ACCACGTCTCACACCGCTGCTGCTGCTGCTGCTGGAGTTTTAGAGCTAGAAATAGCAAGTTAAAATAAGGCTAGTCCGTTATCAACTTGAAAAACTGGCACCGAGTCGGTGCTTTTTTACCTGGTGACCTGCTGCTGCTGCTCCTCCTTGGCGTCGTTTGGAGACGACGG
1995	ACCACGTCTCACACCGCTGCTGCTGCTGCTGCTGGAGTTTTAGAGCTAGAAATAGCAAGTTAAAATAAGGCTAGTCCGTTATCAACTTGAAAAACTGGCACCGAGTCGGTGCTTTTTTACCTGGTTACCTGCTGCTGCTGCTCCTCGGGGGCTCCGTTTGGAGACGACGG
1996	ACCACGTCTCACACCGCTGCTGCTGCTGCTGCTGGAGTTTTAGAGCTAGAAATAGCAAGTTAAAATAAGGCTAGTCCGTTATCAACTTGAAAAACTGGCACCGAGTCGGTGCTTTTTTACCTGTAGACCTGCTGCTGCTGCTCTTGCTGGGTTAGGTTTGGAGACGACGG
1997	ACCACGTCTCACACCGCTGCTGCTGCTGCTGCTGGAGTTTTAGAGCTAGAAATAGCAAGTTAAAATAAGGCTAGTCCGTTATCAACTTGAAAAACTGGCACCGAGTCGGTGCTTTTTTACCTGTATACCTGCTGCTGCTGCTGAAGCTGGGCCTGGTTTGGAGACGACGG
1998	ACCACGTCTCACACCGCTGCTGCTGCTGCTGCTGGAGTTTTAGAGCTAGAAATAGCAAGTTAAAATAAGGCTAGTCCGTTATCAACTTGAAAAACTGGCACCGAGTCGGTGCTTTTTTACCTGTCAACCTGCTGCTGCTGCTGAGAGGTGGAGAAGTTTGGAGACGACGG
1999	ACCACGTCTCACACCGCTGCTGCTGCTGCTGCTGGAGTTTTAGAGCTAGAAATAGCAAGTTAAAATAAGGCTAGTCCGTTATCAACTTGAAAAACTGGCACCGAGTCGGTGCTTTTTTACCTGTCCACCTGCTGCTGCTGCTGATCCAGGGACACGTTTGGAGACGACGG
2000	ACCACGTCTCACACCGCTGCTGCTGCTGCTGCTGGAGTTTTAGAGCTAGAAATAGCAAGTTAAAATAAGGCTAGTCCGTTATCAACTTGAAAAACTGGCACCGAGTCGGTGCTTTTTTACCTGTTAACCTGCTGCTGCTGCTGCAGTGAGGGGACGTTTGGAGACGACGG
2001	ACCACGTCTCACACCGCTGCTGCTGCTGCTGCTGGAGTTTTAGAGCTAGAAATAGCAAGTTAAAATAAGGCTAGTCCGTTATCAACTTGAAAAACTGGCACCGAGTCGGTGCTTTTTTACCTGTTCACCTGCTGCTGCTGCTGCATGATGGCCATGTTTGGAGACGACGG
2002	ACCACGTCTCACACCGCTGCTGCTGCTGCTGCTGGAGTTTTAGAGCTAGAAATAGCAAGTTAAAATAAGGCTAGTCCGTTATCAACTTGAAAAACTGGCACCGAGTCGGTGCTTTTTTACCTGTTGACCTGCTGCTGCTGCTGCCACCAGGGTCAGTTTGGAGACGACGG
2003	ACCACGTCTCACACCGCTGCTGCTGCTGCTGCTGGAGTTTTAGAGCTAGAAATAGCAAGTTAAAATAAGGCTAGTCCGTTATCAACTTGAAAAACTGGCACCGAGTCGGTGCTTTTTTACCTTAACACCTGCTGCTGCTGCTGCCGCGTGGTCAAGTTTGGAGACGACGG
2004	ACCACGTCTCACACCGCTGCTGCTGCTGCTGCTGGAGTTTTAGAGCTAGAAATAGCAAGTTAAAATAAGGCTAGTCCGTTATCAACTTGAAAAACTGGCACCGAGTCGGTGCTTTTTTACCTTAAGACCTGCTGCTGCTGCTGCCGGGCGGCCGCGTTTGGAGACGACGG
2005	ACCACGTCTCACACCGCTGCTGCTGCTGCTGCTGGAGTTTTAGAGCTAGAAATAGCAAGTTAAAATAAGGCTAGTCCGTTATCAACTTGAAAAACTGGCACCGAGTCGGTGCTTTTTTACCTTAGAACCTGCTGCTGCTGCTGCTATCGGGGGATGTTTGGAGACGACGG
2006	ACCACGTCTCACACCGCTGCTGCTGCTGCTGCTGGAGTTTTAGAGCTAGAAATAGCAAGTTAAAATAAGGCTAGTCCGTTATCAACTTGAAAAACTGGCACCGAGTCGGTGCTTTTTTACCTTAGCACCTGCTGCTGCTGCTGCTATTTGGTGTGGTTTGGAGACGACGG
2007	ACCACGTCTCACACCGCTGCTGCTGCTGCTGCTGGAGTTTTAGAGCTAGAAATAGCAAGTTAAAATAAGGCTAGTCCGTTATCAACTTGAAAAACTGGCACCGAGTCGGTGCTTTTTTACCTTAGGACCTGCTGCTGCTGCTGCTCCAAGGACCCGTTTGGAGACGACGG
2008	ACCACGTCTCACACCGCTGCTGCTGCTGCTGCTGGAGTTTTAGAGCTAGAAATAGCAAGTTAAAATAAGGCTAGTCCGTTATCAACTTGAAAAACTGGCACCGAGTCGGTGCTTTTTTACCTTCAGACCTGCTGCTGCTGCTGCTCGGTGGGTCTGTTTGGAGACGACGG
2009	ACCACGTCTCACACCGCTGCTGCTGCTGCTGCTGGAGTTTTAGAGCTAGAAATAGCAAGTTAAAATAAGGCTAGTCCGTTATCAACTTGAAAAACTGGCACCGAGTCGGTGCTTTTTTACCTTCCGACCTGCTGCTGCTGCTGCTGAGAGGTGGAGTTTGGAGACGACGG
2010	ACCACGTCTCACACCGCTGCTGCTGCTGCTGCTGGAGTTTTAGAGCTAGAAATAGCAAGTTAAAATAAGGCTAGTCCGTTATCAACTTGAAAAACTGGCACCGAGTCGGTGCTTTTTTACGAACTCACCTGCTGCTGCTGCTGCTGGCCGGGGCCGTTTGGAGACGACGG
2011	ACCACGTCTCACACCGCTGCTGCTGCTGCTGCTGGAGTTTTAGAGCTAGAAATAGCAAGTTAAAATAAGGCTAGTCCGTTATCAACTTGAAAAACTGGCACCGAGTCGGTGCTTTTTTACGAAGCAACCTGCTGCTGCTGCTGCTGGGTGGTACCGTTTGGAGACGACGG
2012	ACCACGTCTCACACCGCTGCTGCTGCTGCTGCTGGAGTTTTAGAGCTAGAAATAGCAAGTTAAAATAAGGCTAGTCCGTTATCAACTTGAAAAACTGGCACCGAGTCGGTGCTTTTTTACGAAGTTACCTGCTGCTGCTGCTGCTTAAAGGCTCAGTTTGGAGACGACGG
2013	ACCACGTCTCACACCGCTGCTGCTGCTGCTGCTGGAGTTTTAGAGCTAGAAATAGCAAGTTAAAATAAGGCTAGTCCGTTATCAACTTGAAAAACTGGCACCGAGTCGGTGCTTTTTTACGAATACACCTGCTGCTGCTGCTGCTTCGCGGAGGTGTTTGGAGACGACGG
2014	ACCACGTCTCACACCGCTGCTGCTGCTGCTGCTGGAGTTTTAGAGCTAGAAATAGCAAGTTAAAATAAGGCTAGTCCGTTATCAACTTGAAAAACTGGCACCGAGTCGGTGCTTTTTTACGAATAGACCTGCTGCTGCTGCTGCTTCTAGGTGGCGTTTGGAGACGACGG
2015	ACCACGTCTCACACCGGAAGGACTTGAGGGACTCGAGTTTTAGAGCTAGAAATAGCAAGTTAAAATAAGGCTAGTCCGTTATCAACTTGAAAAACTGGCACCGAGTCGGTGCTTTTTTACGAATGAACAAAAGACTTTGGGGACTCGAGGGGGAAGTTTGGAGACGACGG
2017	ACCACGTCTCACACCGGAAGGACTTGAGGGACTCGAGTTTTAGAGCTAGAAATAGCAAGTTAAAATAAGGCTAGTCCGTTATCAACTTGAAAAACTGGCACCGAGTCGGTGCTTTTTTACGAATTCACAAAGGACTTTGGGGACTCAAGGGGAAGGTTTGGAGACGACGG
2019	ACCACGTCTCACACCGGAAGGACTTGAGGGACTCGAGTTTTAGAGCTAGAAATAGCAAGTTAAAATAAGGCTAGTCCGTTATCAACTTGAAAAACTGGCACCGAGTCGGTGCTTTTTTACGACATGACAATGGACTTTAGGGACTCAAGGGGAAGGTTTGGAGACGACGG
2023	ACCACGTCTCACACCGGAAGGACTTGAGGGACTCGAGTTTTAGAGCTAGAAATAGCAAGTTAAAATAAGGCTAGTCCGTTATCAACTTGAAAAACTGGCACCGAGTCGGTGCTTTTTTACGACCTCACAATGGACTTTAGGGACTCGAGGGAAAGGTTTGGAGACGACGG
2024	ACCACGTCTCACACCGGAAGGACTTGAGGGACTCGAGTTTTAGAGCTAGAAATAGCAAGTTAAAATAAGGCTAGTCCGTTATCAACTTGAAAAACTGGCACCGAGTCGGTGCTTTTTTACGACGAGACAATGGACTTTAGGGACTTGAGGGAAAGGTTTGGAGACGACGG
2026	ACCACGTCTCACACCGGAAGGACTTGAGGGACTCGAGTTTTAGAGCTAGAAATAGCAAGTTAAAATAAGGCTAGTCCGTTATCAACTTGAAAAACTGGCACCGAGTCGGTGCTTTTTTACGACGCAACAATGGACTTTGGGGACTCGAGGGGAAAGTTTGGAGACGACGG
2031	ACCACGTCTCACACCGGAAGGACTTGAGGGACTCGAGTTTTAGAGCTAGAAATAGCAAGTTAAAATAAGGCTAGTCCGTTATCAACTTGAAAAACTGGCACCGAGTCGGTGCTTTTTTACGATCACACGATGGACTTAGGGGACTCGGAGGGAAAGTTTGGAGACGACGG
2032	ACCACGTCTCACACCGGAAGGACTTGAGGGACTCGAGTTTTAGAGCTAGAAATAGCAAGTTAAAATAAGGCTAGTCCGTTATCAACTTGAAAAACTGGCACCGAGTCGGTGCTTTTTTACGATCCGACGATGGACTTTAGGGACTTGGGGGGAGGGTTTGGAGACGACGG
2034	ACCACGTCTCACACCGGAAGGACTTGAGGGACTCGAGTTTTAGAGCTAGAAATAGCAAGTTAAAATAAGGCTAGTCCGTTATCAACTTGAAAAACTGGCACCGAGTCGGTGCTTTTTTACGATCTCACGATGGACTTTGGGGACTTGAGGGGAAGGTTTGGAGACGACGG
2050	ACCACGTCTCACACCGGAAGGACTTGAGGGACTCGAGTTTTAGAGCTAGAAATAGCAAGTTAAAATAAGGCTAGTCCGTTATCAACTTGAAAAACTGGCACCGAGTCGGTGCTTTTTTACGCGGCTACGATGGACTTTGGGGACTCAAGGGAGAAGTTTGGAGACGACGG
2052	ACCACGTCTCACACCGGAAGGACTTGAGGGACTCGAGTTTTAGAGCTAGAAATAGCAAGTTAAAATAAGGCTAGTCCGTTATCAACTTGAAAAACTGGCACCGAGTCGGTGCTTTTTTACGCTAGCACGGAGGACTAGAAGGACTAGAAGGAAGAGTTTGGAGACGACGG
2054	ACCACGTCTCACACCGGAAGGACTTGAGGGACTCGAGTTTTAGAGCTAGAAATAGCAAGTTAAAATAAGGCTAGTCCGTTATCAACTTGAAAAACTGGCACCGAGTCGGTGCTTTTTTACGAATGGACAAAGGACTGCGGGGACTCGAGGGACCGGTTTGGAGACGACGG
2055	ACCACGTCTCACACCGGAAGGACTTGAGGGACTCGAGTTTTAGAGCTAGAAATAGCAAGTTAAAATAAGGCTAGTCCGTTATCAACTTGAAAAACTGGCACCGAGTCGGTGCTTTTTTACGAATGTACAAAGGACTTGAGAGACTCCATGGTGAAGTTTGGAGACGACGG
2056	ACCACGTCTCACACCGGAAGGACTTGAGGGACTCGAGTTTTAGAGCTAGAAATAGCAAGTTAAAATAAGGCTAGTCCGTTATCAACTTGAAAAACTGGCACCGAGTCGGTGCTTTTTTACGAATTAACAAAGGACTTTAGGGACTCAGGGGAAAGGTTTGGAGACGACGG
2057	ACCACGTCTCACACCGGAAGGACTTGAGGGACTCGAGTTTTAGAGCTAGAAATAGCAAGTTAAAATAAGGCTAGTCCGTTATCAACTTGAAAAACTGGCACCGAGTCGGTGCTTTTTTACGACAACACAAAGGACTTTGGGGACTCGGGGGAAAGGTTTGGAGACGACGG
2058	ACCACGTCTCACACCGGAAGGACTTGAGGGACTCGAGTTTTAGAGCTAGAAATAGCAAGTTAAAATAAGGCTAGTCCGTTATCAACTTGAAAAACTGGCACCGAGTCGGTGCTTTTTTACGACAATACAAAGGATTTGAGGCAATCGAGGGGAAGGTTTGGAGACGACGG
2059	ACCACGTCTCACACCGGAAGGACTTGAGGGACTCGAGTTTTAGAGCTAGAAATAGCAAGTTAAAATAAGGCTAGTCCGTTATCAACTTGAAAAACTGGCACCGAGTCGGTGCTTTTTTACGACACGACAAAGTACTTGAGGGATTCGGTGGAACTGTTTGGAGACGACGG
2061	ACCACGTCTCACACCGGAAGGACTTGAGGGACTCGAGTTTTAGAGCTAGAAATAGCAAGTTAAAATAAGGCTAGTCCGTTATCAACTTGAAAAACTGGCACCGAGTCGGTGCTTTTTTACGACCTGACAATGGACTTTAGGGACTTGAAGGGAAGGTTTGGAGACGACGG
2062	ACCACGTCTCACACCGGAAGGACTTGAGGGACTCGAGTTTTAGAGCTAGAAATAGCAAGTTAAAATAAGGCTAGTCCGTTATCAACTTGAAAAACTGGCACCGAGTCGGTGCTTTTTTACGACGTAACCAAAGACTTGAGGGACCTGAAGGAATTGTTTGGAGACGACGG
2063	ACCACGTCTCACACCGGAAGGACTTGAGGGACTCGAGTTTTAGAGCTAGAAATAGCAAGTTAAAATAAGGCTAGTCCGTTATCAACTTGAAAAACTGGCACCGAGTCGGTGCTTTTTTACGACTCAACCAAGGACTTGAGAGACTCAGGGGTGGTGTTTGGAGACGACGG
2064	ACCACGTCTCACACCGGAAGGACTTGAGGGACTCGAGTTTTAGAGCTAGAAATAGCAAGTTAAAATAAGGCTAGTCCGTTATCAACTTGAAAAACTGGCACCGAGTCGGTGCTTTTTTACGACTGTACGAAAGACTTGTGGGGCTTGAGGGCCTTGTTTGGAGACGACGG
2065	ACCACGTCTCACACCGGAAGGACTTGAGGGACTCGAGTTTTAGAGCTAGAAATAGCAAGTTAAAATAAGGCTAGTCCGTTATCAACTTGAAAAACTGGCACCGAGTCGGTGCTTTTTTACGAGAAGACGAAGAACTAGAGGAACTAGAGGGGCTGGTTTGGAGACGACGG
2066	ACCACGTCTCACACCGGAAGGACTTGAGGGACTCGAGTTTTAGAGCTAGAAATAGCAAGTTAAAATAAGGCTAGTCCGTTATCAACTTGAAAAACTGGCACCGAGTCGGTGCTTTTTTACGAGACAACGAAGAACTAGAGGGGCTAGAAGGGAAAGTTTGGAGACGACGG
2069	ACCACGTCTCACACCGGAAGGACTTGAGGGACTCGAGTTTTAGAGCTAGAAATAGCAAGTTAAAATAAGGCTAGTCCGTTATCAACTTGAAAAACTGGCACCGAGTCGGTGCTTTTTTACGAGAGCACGAAGGAAATGGGGGACTGGAAGGACTCGTTTGGAGACGACGG
2070	ACCACGTCTCACACCGGAAGGACTTGAGGGACTCGAGTTTTAGAGCTAGAAATAGCAAGTTAAAATAAGGCTAGTCCGTTATCAACTTGAAAAACTGGCACCGAGTCGGTGCTTTTTTACGAGAGGACGAAGGAATGGAGGGAGTAGATGGTGGAGTTTGGAGACGACGG
2071	ACCACGTCTCACACCGGAAGGACTTGAGGGACTCGAGTTTTAGAGCTAGAAATAGCAAGTTAAAATAAGGCTAGTCCGTTATCAACTTGAAAAACTGGCACCGAGTCGGTGCTTTTTTACGAGATAACGAAGGACATGGGGGACAGGAAGGATGAGTTTGGAGACGACGG
2072	ACCACGTCTCACACCGGAAGGACTTGAGGGACTCGAGTTTTAGAGCTAGAAATAGCAAGTTAAAATAAGGCTAGTCCGTTATCAACTTGAAAAACTGGCACCGAGTCGGTGCTTTTTTACGAGATCACGAAGGACCTGAGGCACTCCTCGGTGCTGTTTGGAGACGACGG
2073	ACCACGTCTCACACCGGAAGGACTTGAGGGACTCGAGTTTTAGAGCTAGAAATAGCAAGTTAAAATAAGGCTAGTCCGTTATCAACTTGAAAAACTGGCACCGAGTCGGTGCTTTTTTACGAGATTACGAAGGACGTGGAGGACTCGGAGGCGGAGTTTGGAGACGACGG
2074	ACCACGTCTCACACCGGAAGGACTTGAGGGACTCGAGTTTTAGAGCTAGAAATAGCAAGTTAAAATAAGGCTAGTCCGTTATCAACTTGAAAAACTGGCACCGAGTCGGTGCTTTTTTACGAGCATACGAAGGACTAAAGGGACTCTGAGGACACGTTTGGAGACGACGG
2075	ACCACGTCTCACACCGGAAGGACTTGAGGGACTCGAGTTTTAGAGCTAGAAATAGCAAGTTAAAATAAGGCTAGTCCGTTATCAACTTGAAAAACTGGCACCGAGTCGGTGCTTTTTTACGAGCCTACGAAGGACTGCAGGTACTCGAAGGTAGGGTTTGGAGACGACGG
2076	ACCACGTCTCACACCGGAAGGACTTGAGGGACTCGAGTTTTAGAGCTAGAAATAGCAAGTTAAAATAAGGCTAGTCCGTTATCAACTTGAAAAACTGGCACCGAGTCGGTGCTTTTTTACGAGCGAACGAAGGACTGGAGGGAAGGGATGGTGAAGTTTGGAGACGACGG
2078	ACCACGTCTCACACCGGAAGGACTTGAGGGACTCGAGTTTTAGAGCTAGAAATAGCAAGTTAAAATAAGGCTAGTCCGTTATCAACTTGAAAAACTGGCACCGAGTCGGTGCTTTTTTACGAGCGGACGAAGGACTGGAGTGAATCCAGGGCGAGGTTTGGAGACGACGG
2079	ACCACGTCTCACACCGGAAGGACTTGAGGGACTCGAGTTTTAGAGCTAGAAATAGCAAGTTAAAATAAGGCTAGTCCGTTATCAACTTGAAAAACTGGCACCGAGTCGGTGCTTTTTTACGAGCGTACGAAGGACTTAAGGGAGTAGGGGGCGCAGTTTGGAGACGACGG
2080	ACCACGTCTCACACCGGAAGGACTTGAGGGACTCGAGTTTTAGAGCTAGAAATAGCAAGTTAAAATAAGGCTAGTCCGTTATCAACTTGAAAAACTGGCACCGAGTCGGTGCTTTTTTACGAGGATACGAAGGACTTGCAGGACTCAGTGGAAGCGTTTGGAGACGACGG
2082	ACCACGTCTCACACCGGAAGGACTTGAGGGACTCGAGTTTTAGAGCTAGAAATAGCAAGTTAAAATAAGGCTAGTCCGTTATCAACTTGAAAAACTGGCACCGAGTCGGTGCTTTTTTACGAGGCGACGAAGGAGATGAGGGACAGGATGGGAATGTTTGGAGACGACGG
2083	ACCACGTCTCACACCGGAAGGACTTGAGGGACTCGAGTTTTAGAGCTAGAAATAGCAAGTTAAAATAAGGCTAGTCCGTTATCAACTTGAAAAACTGGCACCGAGTCGGTGCTTTTTTACGAGGTAACGAAGGAGTTGTGGGACTGCAGGGGCTTGTTTGGAGACGACGG
2084	ACCACGTCTCACACCGGAAGGACTTGAGGGACTCGAGTTTTAGAGCTAGAAATAGCAAGTTAAAATAAGGCTAGTCCGTTATCAACTTGAAAAACTGGCACCGAGTCGGTGCTTTTTTACGAGGTGACGAAGGATTTGAGGAACTCCTAGGGCTGGTTTGGAGACGACGG
2085	ACCACGTCTCACACCGGAAGGACTTGAGGGACTCGAGTTTTAGAGCTAGAAATAGCAAGTTAAAATAAGGCTAGTCCGTTATCAACTTGAAAAACTGGCACCGAGTCGGTGCTTTTTTACGAGTACACGAAGGATTTGGGGGAGTCAAAGGGAAGGTTTGGAGACGACGG
2086	ACCACGTCTCACACCGGAAGGACTTGAGGGACTCGAGTTTTAGAGCTAGAAATAGCAAGTTAAAATAAGGCTAGTCCGTTATCAACTTGAAAAACTGGCACCGAGTCGGTGCTTTTTTACGAGTAGACGAAGGCCCTGTGGGATTCGAGGGTCCCGTTTGGAGACGACGG
2087	ACCACGTCTCACACCGGAAGGACTTGAGGGACTCGAGTTTTAGAGCTAGAAATAGCAAGTTAAAATAAGGCTAGTCCGTTATCAACTTGAAAAACTGGCACCGAGTCGGTGCTTTTTTACGAGTATACGAAGGCCTTGCGGGCCTCCAGGGGCTCGTTTGGAGACGACGG
2088	ACCACGTCTCACACCGGAAGGACTTGAGGGACTCGAGTTTTAGAGCTAGAAATAGCAAGTTAAAATAAGGCTAGTCCGTTATCAACTTGAAAAACTGGCACCGAGTCGGTGCTTTTTTACGAGTCAACGAAGGCGTTGAGGGAATCCAAGGCCAGGTTTGGAGACGACGG
2089	ACCACGTCTCACACCGGAAGGACTTGAGGGACTCGAGTTTTAGAGCTAGAAATAGCAAGTTAAAATAAGGCTAGTCCGTTATCAACTTGAAAAACTGGCACCGAGTCGGTGCTTTTTTACGAGTCCACGAAGGGCTGGAGGGACTGGAGGGACCGGTTTGGAGACGACGG
2090	ACCACGTCTCACACCGGAAGGACTTGAGGGACTCGAGTTTTAGAGCTAGAAATAGCAAGTTAAAATAAGGCTAGTCCGTTATCAACTTGAAAAACTGGCACCGAGTCGGTGCTTTTTTACGAGTCGACGAAGGGCTTGGGGGCCTTGAAGGCAGGGTTTGGAGACGACGG
2091	ACCACGTCTCACACCGGAAGGACTTGAGGGACTCGAGTTTTAGAGCTAGAAATAGCAAGTTAAAATAAGGCTAGTCCGTTATCAACTTGAAAAACTGGCACCGAGTCGGTGCTTTTTTACGATACGACGACTGACTTGAGGGGCTTGAGGGAGCAGTTTGGAGACGACGG
2092	ACCACGTCTCACACCGGAAGGACTTGAGGGACTCGAGTTTTAGAGCTAGAAATAGCAAGTTAAAATAAGGCTAGTCCGTTATCAACTTGAAAAACTGGCACCGAGTCGGTGCTTTTTTACGATAGCACGAGGAACTGGAGGGACTAGAGGGAGGTGTTTGGAGACGACGG
2093	ACCACGTCTCACACCGGAAGGACTTGAGGGACTCGAGTTTTAGAGCTAGAAATAGCAAGTTAAAATAAGGCTAGTCCGTTATCAACTTGAAAAACTGGCACCGAGTCGGTGCTTTTTTACGATAGGACGAGGGACTGGAGGGTGTCGAAGGCTCCGTTTGGAGACGACGG
2094	ACCACGTCTCACACCGGAAGGACTTGAGGGACTCGAGTTTTAGAGCTAGAAATAGCAAGTTAAAATAAGGCTAGTCCGTTATCAACTTGAAAAACTGGCACCGAGTCGGTGCTTTTTTACGATCATACGATGGACTTCAGGGACTTGTGGGGAAGGTTTGGAGACGACGG
2095	ACCACGTCTCACACCGGAAGGACTTGAGGGACTCGAGTTTTAGAGCTAGAAATAGCAAGTTAAAATAAGGCTAGTCCGTTATCAACTTGAAAAACTGGCACCGAGTCGGTGCTTTTTTACGATCCAACGATGGACTTGAGAGAATCGGAGGAGTCGTTTGGAGACGACGG
2097	ACCACGTCTCACACCGGAAGGACTTGAGGGACTCGAGTTTTAGAGCTAGAAATAGCAAGTTAAAATAAGGCTAGTCCGTTATCAACTTGAAAAACTGGCACCGAGTCGGTGCTTTTTTACGATGCCACGCAGGAGTTGGGGGACTTGATGGAATTGTTTGGAGACGACGG
2098	ACCACGTCTCACACCGGAAGGACTTGAGGGACTCGAGTTTTAGAGCTAGAAATAGCAAGTTAAAATAAGGCTAGTCCGTTATCAACTTGAAAAACTGGCACCGAGTCGGTGCTTTTTTACGATGCGACGCAGTACTTGAGGTCCTCGATGGCTGGGTTTGGAGACGACGG
2099	ACCACGTCTCACACCGGAAGGACTTGAGGGACTCGAGTTTTAGAGCTAGAAATAGCAAGTTAAAATAAGGCTAGTCCGTTATCAACTTGAAAAACTGGCACCGAGTCGGTGCTTTTTTACGATGGCACGCTGGACTTGAGGGAATCCAGGGCTTGGTTTGGAGACGACGG
2101	ACCACGTCTCACACCGGAAGGACTTGAGGGACTCGAGTTTTAGAGCTAGAAATAGCAAGTTAAAATAAGGCTAGTCCGTTATCAACTTGAAAAACTGGCACCGAGTCGGTGCTTTTTTACGATGTCACGGAGGACTTGAGGGGCTCCTGGGTGTGGTTTGGAGACGACGG
2102	ACCACGTCTCACACCGGAAGGACTTGAGGGACTCGAGTTTTAGAGCTAGAAATAGCAAGTTAAAATAAGGCTAGTCCGTTATCAACTTGAAAAACTGGCACCGAGTCGGTGCTTTTTTACGATGTGACGGTGGACTTGAGGGACTCGGTGGAGGGGTTTGGAGACGACGG
2104	ACCACGTCTCACACCGGAAGGACTTGAGGGACTCGAGTTTTAGAGCTAGAAATAGCAAGTTAAAATAAGGCTAGTCCGTTATCAACTTGAAAAACTGGCACCGAGTCGGTGCTTTTTTACGATTGCACAAAGGACATGGGGGACTCGGGGGAAAAGTTTGGAGACGACGG
2105	ACCACGTCTCACACCGGAAGGACTTGAGGGACTCGAGTTTTAGAGCTAGAAATAGCAAGTTAAAATAAGGCTAGTCCGTTATCAACTTGAAAAACTGGCACCGAGTCGGTGCTTTTTTACGATTGTACAAAGGACTTGATGCACTTGAAGGTTTGGTTTGGAGACGACGG
2106	ACCACGTCTCACACCGGAAGGACTTGAGGGACTCGAGTTTTAGAGCTAGAAATAGCAAGTTAAAATAAGGCTAGTCCGTTATCAACTTGAAAAACTGGCACCGAGTCGGTGCTTTTTTACGCAACAACAAAGGACTTGGGGGACTCCCGGGGTTCGTTTGGAGACGACGG
2107	ACCACGTCTCACACCGGAAGGACTTGAGGGACTCGAGTTTTAGAGCTAGAAATAGCAAGTTAAAATAAGGCTAGTCCGTTATCAACTTGAAAAACTGGCACCGAGTCGGTGCTTTTTTACGCAACGACAAAGGACTTTAGGGACTCGGGGGGAAGGTTTGGAGACGACGG
2108	ACCACGTCTCACACCGGAAGGACTTGAGGGACTCGAGTTTTAGAGCTAGAAATAGCAAGTTAAAATAAGGCTAGTCCGTTATCAACTTGAAAAACTGGCACCGAGTCGGTGCTTTTTTACGCAAGCACAACGGACTTTGGGGACTCGAGGGGAAAGTTTGGAGACGACGG
2109	ACCACGTCTCACACCGGAAGGACTTGAGGGACTCGAGTTTTAGAGCTAGAAATAGCAAGTTAAAATAAGGCTAGTCCGTTATCAACTTGAAAAACTGGCACCGAGTCGGTGCTTTTTTACGCACATACAATGGACTTCAGGGACTCAAGGGGAAAGTTTGGAGACGACGG
2110	ACCACGTCTCACACCGGAAGGACTTGAGGGACTCGAGTTTTAGAGCTAGAAATAGCAAGTTAAAATAAGGCTAGTCCGTTATCAACTTGAAAAACTGGCACCGAGTCGGTGCTTTTTTACGCAGAGACAATGGACTTTAGGGACTCGGAGGGGGAGTTTGGAGACGACGG
2111	ACCACGTCTCACACCGGAAGGACTTGAGGGACTCGAGTTTTAGAGCTAGAAATAGCAAGTTAAAATAAGGCTAGTCCGTTATCAACTTGAAAAACTGGCACCGAGTCGGTGCTTTTTTACGCAGCCACAATGGACTTTGGGGACTCGAAGGGGAAGTTTGGAGACGACGG
2112	ACCACGTCTCACACCGGAAGGACTTGAGGGACTCGAGTTTTAGAGCTAGAAATAGCAAGTTAAAATAAGGCTAGTCCGTTATCAACTTGAAAAACTGGCACCGAGTCGGTGCTTTTTTACGCATATACGAAAGAGTAGAGGGACTGGAAGGTGCTGTTTGGAGACGACGG
2113	ACCACGTCTCACACCGGAAGGACTTGAGGGACTCGAGTTTTAGAGCTAGAAATAGCAAGTTAAAATAAGGCTAGTCCGTTATCAACTTGAAAAACTGGCACCGAGTCGGTGCTTTTTTACGCATCCACGAAAGGCTTGAGGGACATGAGGGAGCCGTTTGGAGACGACGG
2114	ACCACGTCTCACACCGGAAGGACTTGAGGGACTCGAGTTTTAGAGCTAGAAATAGCAAGTTAAAATAAGGCTAGTCCGTTATCAACTTGAAAAACTGGCACCGAGTCGGTGCTTTTTTACGCATCGACGAAGAACTAGAGGGGCTGGAAGGGCGCGTTTGGAGACGACGG
2115	ACCACGTCTCACACCGGAAGGACTTGAGGGACTCGAGTTTTAGAGCTAGAAATAGCAAGTTAAAATAAGGCTAGTCCGTTATCAACTTGAAAAACTGGCACCGAGTCGGTGCTTTTTTACGCATGAACGAAGAACTTCAGTGACCCGATGGAGCTGTTTGGAGACGACGG
2116	ACCACGTCTCACACCGGAAGGACTTGAGGGACTCGAGTTTTAGAGCTAGAAATAGCAAGTTAAAATAAGGCTAGTCCGTTATCAACTTGAAAAACTGGCACCGAGTCGGTGCTTTTTTACGCATGCACGAAGAACTTGAGGTAGTTGAAGGACCCGTTTGGAGACGACGG
2117	ACCACGTCTCACACCGGAAGGACTTGAGGGACTCGAGTTTTAGAGCTAGAAATAGCAAGTTAAAATAAGGCTAGTCCGTTATCAACTTGAAAAACTGGCACCGAGTCGGTGCTTTTTTACGCATTAACGAAGCACAACAGGGACTCGAGGGGGAAGTTTGGAGACGACGG
2118	ACCACGTCTCACACCGGAAGGACTTGAGGGACTCGAGTTTTAGAGCTAGAAATAGCAAGTTAAAATAAGGCTAGTCCGTTATCAACTTGAAAAACTGGCACCGAGTCGGTGCTTTTTTACGCCATAACGAAGCAGTTGAGGGACTAGGAGGTGGCGTTTGGAGACGACGG
2119	ACCACGTCTCACACCGGAAGGACTTGAGGGACTCGAGTTTTAGAGCTAGAAATAGCAAGTTAAAATAAGGCTAGTCCGTTATCAACTTGAAAAACTGGCACCGAGTCGGTGCTTTTTTACGCCATCACGAAGGACAGGAGGGACAGGAGGGATAGGTTTGGAGACGACGG
2120	ACCACGTCTCACACCGGAAGGACTTGAGGGACTCGAGTTTTAGAGCTAGAAATAGCAAGTTAAAATAAGGCTAGTCCGTTATCAACTTGAAAAACTGGCACCGAGTCGGTGCTTTTTTACGCCGATACGAAGGACTGGAGGGGCCAGATGGGGAAGTTTGGAGACGACGG
2121	ACCACGTCTCACACCGGAAGGACTTGAGGGACTCGAGTTTTAGAGCTAGAAATAGCAAGTTAAAATAAGGCTAGTCCGTTATCAACTTGAAAAACTGGCACCGAGTCGGTGCTTTTTTACGCCGCCACGAAGGACTGGAGGGGGGCGAGGGATAAGTTTGGAGACGACGG
2122	ACCACGTCTCACACCGGAAGGACTTGAGGGACTCGAGTTTTAGAGCTAGAAATAGCAAGTTAAAATAAGGCTAGTCCGTTATCAACTTGAAAAACTGGCACCGAGTCGGTGCTTTTTTACGCCGCGACGAAGGACTGGATGGATTTGATGGGTTTGTTTGGAGACGACGG
2123	ACCACGTCTCACACCGGAAGGACTTGAGGGACTCGAGTTTTAGAGCTAGAAATAGCAAGTTAAAATAAGGCTAGTCCGTTATCAACTTGAAAAACTGGCACCGAGTCGGTGCTTTTTTACGCCGGAACGAAGGACTTGAGCCACTAGGGGGATAGGTTTGGAGACGACGG
2124	ACCACGTCTCACACCGGAAGGACTTGAGGGACTCGAGTTTTAGAGCTAGAAATAGCAAGTTAAAATAAGGCTAGTCCGTTATCAACTTGAAAAACTGGCACCGAGTCGGTGCTTTTTTACGCCGGTACGAAGGACTTTGGGGACTTGGGGGAAAGGTTTGGAGACGACGG
2125	ACCACGTCTCACACCGGAAGGACTTGAGGGACTCGAGTTTTAGAGCTAGAAATAGCAAGTTAAAATAAGGCTAGTCCGTTATCAACTTGAAAAACTGGCACCGAGTCGGTGCTTTTTTACGCCGTCACGAAGGAGAGGAGGGACTGGAGGGGGCAGTTTGGAGACGACGG
2126	ACCACGTCTCACACCGGAAGGACTTGAGGGACTCGAGTTTTAGAGCTAGAAATAGCAAGTTAAAATAAGGCTAGTCCGTTATCAACTTGAAAAACTGGCACCGAGTCGGTGCTTTTTTACGCCTCCACGAAGGCCTGCAGGTACTCGAAGGTGGGGTTTGGAGACGACGG
2127	ACCACGTCTCACACCGGAAGGACTTGAGGGACTCGAGTTTTAGAGCTAGAAATAGCAAGTTAAAATAAGGCTAGTCCGTTATCAACTTGAAAAACTGGCACCGAGTCGGTGCTTTTTTACGCCTCTACGAAGGCCTTGAGGGGCCCAAAGGATGTGTTTGGAGACGACGG
2128	ACCACGTCTCACACCGGAAGGACTTGAGGGACTCGAGTTTTAGAGCTAGAAATAGCAAGTTAAAATAAGGCTAGTCCGTTATCAACTTGAAAAACTGGCACCGAGTCGGTGCTTTTTTACGCCTTAACGAAGGGCCTCAGGGACTAGAAGGAAAAGTTTGGAGACGACGG
2131	ACCACGTCTCACACCGGAAGGACTTGAGGGACTCGAGTTTTAGAGCTAGAAATAGCAAGTTAAAATAAGGCTAGTCCGTTATCAACTTGAAAAACTGGCACCGAGTCGGTGCTTTTTTACGCGAGAACGAATGATTTCAGGCACTCGAGGGCCAGGTTTGGAGACGACGG
2132	ACCACGTCTCACACCGGAAGGACTTGAGGGACTCGAGTTTTAGAGCTAGAAATAGCAAGTTAAAATAAGGCTAGTCCGTTATCAACTTGAAAAACTGGCACCGAGTCGGTGCTTTTTTACGCGAGGACGAATGTCTTTAGGGACTGGATGGTGACGTTTGGAGACGACGG
2133	ACCACGTCTCACACCGGAAGGACTTGAGGGACTCGAGTTTTAGAGCTAGAAATAGCAAGTTAAAATAAGGCTAGTCCGTTATCAACTTGAAAAACTGGCACCGAGTCGGTGCTTTTTTACGCGATAACGACAGACTCGAGGGTCTCGACGGCAGGGTTTGGAGACGACGG
2134	ACCACGTCTCACACCGGAAGGACTTGAGGGACTCGAGTTTTAGAGCTAGAAATAGCAAGTTAAAATAAGGCTAGTCCGTTATCAACTTGAAAAACTGGCACCGAGTCGGTGCTTTTTTACGCGATCACGACGGACTTTGGGGACTCGGGGGAAATGTTTGGAGACGACGG
2135	ACCACGTCTCACACCGGAAGGACTTGAGGGACTCGAGTTTTAGAGCTAGAAATAGCAAGTTAAAATAAGGCTAGTCCGTTATCAACTTGAAAAACTGGCACCGAGTCGGTGCTTTTTTACGCGCCAACGAGGGAATTGAGGCACTAGATGGTAATGTTTGGAGACGACGG
2137	ACCACGTCTCACACCGGAAGGACTTGAGGGACTCGAGTTTTAGAGCTAGAAATAGCAAGTTAAAATAAGGCTAGTCCGTTATCAACTTGAAAAACTGGCACCGAGTCGGTGCTTTTTTACGCGCTTACGATGGACTTGAGGGCCTCTAGGGCTAAGTTTGGAGACGACGG
2138	ACCACGTCTCACACCGGAAGGACTTGAGGGACTCGAGTTTTAGAGCTAGAAATAGCAAGTTAAAATAAGGCTAGTCCGTTATCAACTTGAAAAACTGGCACCGAGTCGGTGCTTTTTTACGCGTTCACGCAGGATTTGTGGGACTGGATGGGTGTGTTTGGAGACGACGG
2139	ACCACGTCTCACACCGGAAGGACTTGAGGGACTCGAGTTTTAGAGCTAGAAATAGCAAGTTAAAATAAGGCTAGTCCGTTATCAACTTGAAAAACTGGCACCGAGTCGGTGCTTTTTTACGCTAAGACGCGGGACTGGAGGGACTCGGCGGTCTGGTTTGGAGACGACGG
2142	ACCACGTCTCACACCGGAAGGACTTGAGGGACTCGAGTTTTAGAGCTAGAAATAGCAAGTTAAAATAAGGCTAGTCCGTTATCAACTTGAAAAACTGGCACCGAGTCGGTGCTTTTTTACGCTATCACGGAGGCCTTCAGGGACTCCACGGCCTCGTTTGGAGACGACGG
2143	ACCACGTCTCACACCGGAAGGACTTGAGGGACTCGAGTTTTAGAGCTAGAAATAGCAAGTTAAAATAAGGCTAGTCCGTTATCAACTTGAAAAACTGGCACCGAGTCGGTGCTTTTTTACGCTATGACTAAGGAATTGAGGGACTTGGAGGTTTGGTTTGGAGACGACGG
2144	ACCACGTCTCACACCGGAAGGACTTGAGGGACTCGAGTTTTAGAGCTAGAAATAGCAAGTTAAAATAAGGCTAGTCCGTTATCAACTTGAAAAACTGGCACCGAGTCGGTGCTTTTTTACGCTCACACTAAGGACTTGAGGGCATGGAGGGTTTTGTTTGGAGACGACGG
2145	ACCACGTCTCACACCGGAAGGACTTGAGGGACTCGAGTTTTAGAGCTAGAAATAGCAAGTTAAAATAAGGCTAGTCCGTTATCAACTTGAAAAACTGGCACCGAGTCGGTGCTTTTTTACGCTCAGACTGAAGACTTGAGGGATTCGAGGGGTTAGTTTGGAGACGACGG
2146	ACCACGTCTCACACCGGCTTCCTCAGCCGCCGCCGCGTTTTAGAGCTAGAAATAGCAAGTTAAAATAAGGCTAGTCCGTTATCAACTTGAAAAACTGGCACCGAGTCGGTGCTTTTTTGAAGTGGCACCCTGCCGCCGCCGCCGCCGCCGGAGCTGTTTGGAGACGACGG
2147	ACCACGTCTCACACCGGCTTCCTCAGCCGCCGCCGCGTTTTAGAGCTAGAAATAGCAAGTTAAAATAAGGCTAGTCCGTTATCAACTTGAAAAACTGGCACCGAGTCGGTGCTTTTTTGAAGTTATACCTTTCCTCAGCCGCCGAGGCCGGCGCCGTTTGGAGACGACGG
2148	ACCACGTCTCACACCGGCTTCCTCAGCCGCCGCCGCGTTTTAGAGCTAGAAATAGCAAGTTAAAATAAGGCTAGTCCGTTATCAACTTGAAAAACTGGCACCGAGTCGGTGCTTTTTTGAATAACAACGCAGCCACAGCCGCAGCCGCAGGCCCTGTTTGGAGACGACGG
2150	ACCACGTCTCACACCGGCTTCCTCAGCCGCCGCCGCGTTTTAGAGCTAGAAATAGCAAGTTAAAATAAGGCTAGTCCGTTATCAACTTGAAAAACTGGCACCGAGTCGGTGCTTTTTTGAATAAGAACGCAGCCACCGCCGCCGCCGCCGGAACGGTTTGGAGACGACGG
2151	ACCACGTCTCACACCGGCTTCCTCAGCCGCCGCCGCGTTTTAGAGCTAGAAATAGCAAGTTAAAATAAGGCTAGTCCGTTATCAACTTGAAAAACTGGCACCGAGTCGGTGCTTTTTTGAATACCAACGCCACCGCCGCCGCCGCCGCCGGGCGCGTTTGGAGACGACGG
2152	ACCACGTCTCACACCGGCTTCCTCAGCCGCCGCCGCGTTTTAGAGCTAGAAATAGCAAGTTAAAATAAGGCTAGTCCGTTATCAACTTGAAAAACTGGCACCGAGTCGGTGCTTTTTTGAATAGCAACGCCGCCGCCGCCGCCGCCGCAGGAGCGGTTTGGAGACGACGG
2155	ACCACGTCTCACACCGGCTTCCTCAGCCGCCGCCGCGTTTTAGAGCTAGAAATAGCAAGTTAAAATAAGGCTAGTCCGTTATCAACTTGAAAAACTGGCACCGAGTCGGTGCTTTTTTGAATAGCTACGCCGCCGCCGCCGCCGCCGCCGGGCTCGTTTGGAGACGACGG
2176	ACCACGTCTCACACCGGCTTCCTCAGCCGCCGCCGCGTTTTAGAGCTAGAAATAGCAAGTTAAAATAAGGCTAGTCCGTTATCAACTTGAAAAACTGGCACCGAGTCGGTGCTTTTTTGAATCATGACGCCGCCGCCGCCGCCGCCGCGGGGGCCGTTTGGAGACGACGG
2188	ACCACGTCTCACACCGGCTTCCTCAGCCGCCGCCGCGTTTTAGAGCTAGAAATAGCAAGTTAAAATAAGGCTAGTCCGTTATCAACTTGAAAAACTGGCACCGAGTCGGTGCTTTTTTGAATCGCCACGCCGCCGCCGCCGCCGCCGCTGGAGTCGTTTGGAGACGACGG
2192	ACCACGTCTCACACCGGCTTCCTCAGCCGCCGCCGCGTTTTAGAGCTAGAAATAGCAAGTTAAAATAAGGCTAGTCCGTTATCAACTTGAAAAACTGGCACCGAGTCGGTGCTTTTTTGAATCGTAACGCCGCCGCTGCCGCCGCCGCCGGGCAGGTTTGGAGACGACGG
2194	ACCACGTCTCACACCGGCTTCCTCAGCCGCCGCCGCGTTTTAGAGCTAGAAATAGCAAGTTAAAATAAGGCTAGTCCGTTATCAACTTGAAAAACTGGCACCGAGTCGGTGCTTTTTTGAATCGTTACGCCGCCGCTGCCGCCGCCGCGGGGCCCGTTTGGAGACGACGG
2196	ACCACGTCTCACACCGGCTTCCTCAGCCGCCGCCGCGTTTTAGAGCTAGAAATAGCAAGTTAAAATAAGGCTAGTCCGTTATCAACTTGAAAAACTGGCACCGAGTCGGTGCTTTTTTGAATCTGAACGCCGCTGCAGCCGCCGCCGCCGGAGGCGTTTGGAGACGACGG
2197	ACCACGTCTCACACCGGCTTCCTCAGCCGCCGCCGCGTTTTAGAGCTAGAAATAGCAAGTTAAAATAAGGCTAGTCCGTTATCAACTTGAAAAACTGGCACCGAGTCGGTGCTTTTTTGAATGAGGACGCCTCCGCTGGCGCCGCCGCGGGATCCGTTTGGAGACGACGG
2199	ACCACGTCTCACACCGGCTTCCTCAGCCGCCGCCGCGTTTTAGAGCTAGAAATAGCAAGTTAAAATAAGGCTAGTCCGTTATCAACTTGAAAAACTGGCACCGAGTCGGTGCTTTTTTGAATGTGAACGCTGCCGCCACCGCCGCCGCCGGGAGAGTTTGGAGACGACGG
2200	ACCACGTCTCACACCGGCTTCCTCAGCCGCCGCCGCGTTTTAGAGCTAGAAATAGCAAGTTAAAATAAGGCTAGTCCGTTATCAACTTGAAAAACTGGCACCGAGTCGGTGCTTTTTTGAATGTGGACGCTGCCGCCGCCGCCGCCGCCGGTCCCGTTTGGAGACGACGG
2202	ACCACGTCTCACACCGGCTTCCTCAGCCGCCGCCGCGTTTTAGAGCTAGAAATAGCAAGTTAAAATAAGGCTAGTCCGTTATCAACTTGAAAAACTGGCACCGAGTCGGTGCTTTTTTGAATTACCACGCTGCCGCCGCCGCCGGCGCTGGCCTCGTTTGGAGACGACGG
2203	ACCACGTCTCACACCGGCTTCCTCAGCCGCCGCCGCGTTTTAGAGCTAGAAATAGCAAGTTAAAATAAGGCTAGTCCGTTATCAACTTGAAAAACTGGCACCGAGTCGGTGCTTTTTTGAATTATGACGCTGCTGCCGCCGCCGCCGCCGGTTCTGTTTGGAGACGACGG
2204	ACCACGTCTCACACCGGCTTCCTCAGCCGCCGCCGCGTTTTAGAGCTAGAAATAGCAAGTTAAAATAAGGCTAGTCCGTTATCAACTTGAAAAACTGGCACCGAGTCGGTGCTTTTTTGACACACGACCCCTCCGCAGCCGCCGACGCGGGAGTGGTTTGGAGACGACGG
2239	ACCACGTCTCACACCGGCTTCCTCAGCCGCCGCCGCGTTTTAGAGCTAGAAATAGCAAGTTAAAATAAGGCTAGTCCGTTATCAACTTGAAAAACTGGCACCGAGTCGGTGCTTTTTTGACCAGTTACGTTTCTGCAGCGGCCGCCGCGGGGCTTGTTTGGAGACGACGG
2241	ACCACGTCTCACACCGGCTTCCTCAGCCGCCGCCGCGTTTTAGAGCTAGAAATAGCAAGTTAAAATAAGGCTAGTCCGTTATCAACTTGAAAAACTGGCACCGAGTCGGTGCTTTTTTGAAGTGCCACACCTCCTCTTCCGCCGCCGCAGGCCCGGTTTGGAGACGACGG
2242	ACCACGTCTCACACCGGCTTCCTCAGCCGCCGCCGCGTTTTAGAGCTAGAAATAGCAAGTTAAAATAAGGCTAGTCCGTTATCAACTTGAAAAACTGGCACCGAGTCGGTGCTTTTTTGAAGTGCGACACTGCCACCGCCGCCGCCGCCGGTGGGGTTTGGAGACGACGG
2243	ACCACGTCTCACACCGGCTTCCTCAGCCGCCGCCGCGTTTTAGAGCTAGAAATAGCAAGTTAAAATAAGGCTAGTCCGTTATCAACTTGAAAAACTGGCACCGAGTCGGTGCTTTTTTGAAGTGCTACATTTCCTGGGCCGCCGCCGCCGGGGGCGTTTGGAGACGACGG
2244	ACCACGTCTCACACCGGCTTCCTCAGCCGCCGCCGCGTTTTAGAGCTAGAAATAGCAAGTTAAAATAAGGCTAGTCCGTTATCAACTTGAAAAACTGGCACCGAGTCGGTGCTTTTTTGAAGTGGTACCCTGCCTCAGCCTCCGCAGCTGGGATTGTTTGGAGACGACGG
2245	ACCACGTCTCACACCGGCTTCCTCAGCCGCCGCCGCGTTTTAGAGCTAGAAATAGCAAGTTAAAATAAGGCTAGTCCGTTATCAACTTGAAAAACTGGCACCGAGTCGGTGCTTTTTTGAAGTGTCACCCTGGTTCAGCCGCCGCCGCCGGCGACGTTTGGAGACGACGG
2246	ACCACGTCTCACACCGGCTTCCTCAGCCGCCGCCGCGTTTTAGAGCTAGAAATAGCAAGTTAAAATAAGGCTAGTCCGTTATCAACTTGAAAAACTGGCACCGAGTCGGTGCTTTTTTGAAGTGTGACCCTTCCCCTGCGGCCGCCGCGGGCTCCGTTTGGAGACGACGG
2247	ACCACGTCTCACACCGGCTTCCTCAGCCGCCGCCGCGTTTTAGAGCTAGAAATAGCAAGTTAAAATAAGGCTAGTCCGTTATCAACTTGAAAAACTGGCACCGAGTCGGTGCTTTTTTGAAGTTACACCCTTCCGCAGCCGCCGCCTCAGGGACAGTTTGGAGACGACGG
2248	ACCACGTCTCACACCGGCTTCCTCAGCCGCCGCCGCGTTTTAGAGCTAGAAATAGCAAGTTAAAATAAGGCTAGTCCGTTATCAACTTGAAAAACTGGCACCGAGTCGGTGCTTTTTTGAAGTTCAACGAGTCCCCAGCGGCCGCCGCGGGCCGAGTTTGGAGACGACGG
2249	ACCACGTCTCACACCGGCTTCCTCAGCCGCCGCCGCGTTTTAGAGCTAGAAATAGCAAGTTAAAATAAGGCTAGTCCGTTATCAACTTGAAAAACTGGCACCGAGTCGGTGCTTTTTTGAAGTTCCACGATCCCTCAGCCGCCTCCACGGGCCGGGTTTGGAGACGACGG
2250	ACCACGTCTCACACCGGCTTCCTCAGCCGCCGCCGCGTTTTAGAGCTAGAAATAGCAAGTTAAAATAAGGCTAGTCCGTTATCAACTTGAAAAACTGGCACCGAGTCGGTGCTTTTTTGAAGTTGGACGATGCCCCAGCCGGCGCCGCGGGCGTCGTTTGGAGACGACGG
2251	ACCACGTCTCACACCGGCTTCCTCAGCCGCCGCCGCGTTTTAGAGCTAGAAATAGCAAGTTAAAATAAGGCTAGTCCGTTATCAACTTGAAAAACTGGCACCGAGTCGGTGCTTTTTTGAAGTTGTACGATTCCACCGCCGCGGCCGCCGGGGCCGTTTGGAGACGACGG
2252	ACCACGTCTCACACCGGCTTCCTCAGCCGCCGCCGCGTTTTAGAGCTAGAAATAGCAAGTTAAAATAAGGCTAGTCCGTTATCAACTTGAAAAACTGGCACCGAGTCGGTGCTTTTTTGAATAATCACGCAGCCGCGGCCGCCGCCGCCGGTGCCGTTTGGAGACGACGG
2253	ACCACGTCTCACACCGGCTTCCTCAGCCGCCGCCGCGTTTTAGAGCTAGAAATAGCAAGTTAAAATAAGGCTAGTCCGTTATCAACTTGAAAAACTGGCACCGAGTCGGTGCTTTTTTGAATAATTACGCAGCCTCAGCCACCCCCGCAGGGAGCGTTTGGAGACGACGG
2254	ACCACGTCTCACACCGGCTTCCTCAGCCGCCGCCGCGTTTTAGAGCTAGAAATAGCAAGTTAAAATAAGGCTAGTCCGTTATCAACTTGAAAAACTGGCACCGAGTCGGTGCTTTTTTGAATACAGACGCAGCCTCAGCCGCCGGAGCGGGGAGGGTTTGGAGACGACGG
2255	ACCACGTCTCACACCGGCTTCCTCAGCCGCCGCCGCGTTTTAGAGCTAGAAATAGCAAGTTAAAATAAGGCTAGTCCGTTATCAACTTGAAAAACTGGCACCGAGTCGGTGCTTTTTTGAATACATACGCATCCTCAGCCGGCCCAGCAGGGTTGGTTTGGAGACGACGG
2256	ACCACGTCTCACACCGGCTTCCTCAGCCGCCGCCGCGTTTTAGAGCTAGAAATAGCAAGTTAAAATAAGGCTAGTCCGTTATCAACTTGAAAAACTGGCACCGAGTCGGTGCTTTTTTGAATACGTACGCCCCCGCAGCCCCCGCCGCTGGGGTTGTTTGGAGACGACGG
2257	ACCACGTCTCACACCGGCTTCCTCAGCCGCCGCCGCGTTTTAGAGCTAGAAATAGCAAGTTAAAATAAGGCTAGTCCGTTATCAACTTGAAAAACTGGCACCGAGTCGGTGCTTTTTTGAATACTAACGCCCCCGCCGCCGCCGCCGCGGGGGAAGTTTGGAGACGACGG
2258	ACCACGTCTCACACCGGCTTCCTCAGCCGCCGCCGCGTTTTAGAGCTAGAAATAGCAAGTTAAAATAAGGCTAGTCCGTTATCAACTTGAAAAACTGGCACCGAGTCGGTGCTTTTTTGAATACTGACGCCCCCTCACCCGCCCCCGCGGGGCCCGTTTGGAGACGACGG
2259	ACCACGTCTCACACCGGCTTCCTCAGCCGCCGCCGCGTTTTAGAGCTAGAAATAGCAAGTTAAAATAAGGCTAGTCCGTTATCAACTTGAAAAACTGGCACCGAGTCGGTGCTTTTTTGAATACTTACGCCGCCACAGCCGCTGCCGCTGGCGCCGTTTGGAGACGACGG
2260	ACCACGTCTCACACCGGCTTCCTCAGCCGCCGCCGCGTTTTAGAGCTAGAAATAGCAAGTTAAAATAAGGCTAGTCCGTTATCAACTTGAAAAACTGGCACCGAGTCGGTGCTTTTTTGAATAGACACGCCGCCACAGCGGCCGCCGCGGGCGCCGTTTGGAGACGACGG
2261	ACCACGTCTCACACCGGCTTCCTCAGCCGCCGCCGCGTTTTAGAGCTAGAAATAGCAAGTTAAAATAAGGCTAGTCCGTTATCAACTTGAAAAACTGGCACCGAGTCGGTGCTTTTTTGAATAGATACGCCGCCAGAGCCGCCGCCGCCGGACTGGTTTGGAGACGACGG
2262	ACCACGTCTCACACCGGCTTCCTCAGCCGCCGCCGCGTTTTAGAGCTAGAAATAGCAAGTTAAAATAAGGCTAGTCCGTTATCAACTTGAAAAACTGGCACCGAGTCGGTGCTTTTTTGAATCTAGACGCCGCCTCAGCAGCAGCCGCAGGACTTGTTTGGAGACGACGG
2263	ACCACGTCTCACACCGGCTTCCTCAGCCGCCGCCGCGTTTTAGAGCTAGAAATAGCAAGTTAAAATAAGGCTAGTCCGTTATCAACTTGAAAAACTGGCACCGAGTCGGTGCTTTTTTGAATCTATACGCCGCCTCCGCCGCCGCCTCGGGCAGCGTTTGGAGACGACGG
2264	ACCACGTCTCACACCGGCTTCCTCAGCCGCCGCCGCGTTTTAGAGCTAGAAATAGCAAGTTAAAATAAGGCTAGTCCGTTATCAACTTGAAAAACTGGCACCGAGTCGGTGCTTTTTTGAATCTCGACGCCGCCTCCGCCGCCGCCTCTGGCTACGTTTGGAGACGACGG
2265	ACCACGTCTCACACCGGCTTCCTCAGCCGCCGCCGCGTTTTAGAGCTAGAAATAGCAAGTTAAAATAAGGCTAGTCCGTTATCAACTTGAAAAACTGGCACCGAGTCGGTGCTTTTTTGAATCTGCACGCCGCTTCAGCAGCCGCCGCAGGAACTGTTTGGAGACGACGG
2266	ACCACGTCTCACACCGGCTTCCTCAGCCGCCGCCGCGTTTTAGAGCTAGAAATAGCAAGTTAAAATAAGGCTAGTCCGTTATCAACTTGAAAAACTGGCACCGAGTCGGTGCTTTTTTGAATCTGTACGCCTCCACAGCCGCCGCCCAGGGTTCTGTTTGGAGACGACGG
2267	ACCACGTCTCACACCGGCTTCCTCAGCCGCCGCCGCGTTTTAGAGCTAGAAATAGCAAGTTAAAATAAGGCTAGTCCGTTATCAACTTGAAAAACTGGCACCGAGTCGGTGCTTTTTTGAATCTTAACGCCTCCACCGCCGCAGCCGCCGGCGTGGTTTGGAGACGACGG
2268	ACCACGTCTCACACCGGCTTCCTCAGCCGCCGCCGCGTTTTAGAGCTAGAAATAGCAAGTTAAAATAAGGCTAGTCCGTTATCAACTTGAAAAACTGGCACCGAGTCGGTGCTTTTTTGAATCTTCACGCCTCCACTGCCGCCGCCACCGGTGTCGTTTGGAGACGACGG
2269	ACCACGTCTCACACCGGCTTCCTCAGCCGCCGCCGCGTTTTAGAGCTAGAAATAGCAAGTTAAAATAAGGCTAGTCCGTTATCAACTTGAAAAACTGGCACCGAGTCGGTGCTTTTTTGAATGAACACGCCTCCCCAGCCGCCTCCGCAGGACGCGTTTGGAGACGACGG
2270	ACCACGTCTCACACCGGCTTCCTCAGCCGCCGCCGCGTTTTAGAGCTAGAAATAGCAAGTTAAAATAAGGCTAGTCCGTTATCAACTTGAAAAACTGGCACCGAGTCGGTGCTTTTTTGAATGACCACGCCTCCGCCGCAGCCGCCGCCGGGAGAGTTTGGAGACGACGG
2271	ACCACGTCTCACACCGGCTTCCTCAGCCGCCGCCGCGTTTTAGAGCTAGAAATAGCAAGTTAAAATAAGGCTAGTCCGTTATCAACTTGAAAAACTGGCACCGAGTCGGTGCTTTTTTGAATGACGACGCCTCCGCCGCCGCCGCCCCCGGAGCGGTTTGGAGACGACGG
2272	ACCACGTCTCACACCGGCTTCCTCAGCCGCCGCCGCGTTTTAGAGCTAGAAATAGCAAGTTAAAATAAGGCTAGTCCGTTATCAACTTGAAAAACTGGCACCGAGTCGGTGCTTTTTTGAATGACTACGCCTCCGCCGCCGCCGCCGCCGGCAGCGTTTGGAGACGACGG
2273	ACCACGTCTCACACCGGCTTCCTCAGCCGCCGCCGCGTTTTAGAGCTAGAAATAGCAAGTTAAAATAAGGCTAGTCCGTTATCAACTTGAAAAACTGGCACCGAGTCGGTGCTTTTTTGAATGCACACGCCTCCTCCCCCGCCACCGCCGGCGGTGTTTGGAGACGACGG
2274	ACCACGTCTCACACCGGCTTCCTCAGCCGCCGCCGCGTTTTAGAGCTAGAAATAGCAAGTTAAAATAAGGCTAGTCCGTTATCAACTTGAAAAACTGGCACCGAGTCGGTGCTTTTTTGAATGCATACGCCTCCTCCGCCGCTGCCGCCGGGTCCGTTTGGAGACGACGG
2275	ACCACGTCTCACACCGGCTTCCTCAGCCGCCGCCGCGTTTTAGAGCTAGAAATAGCAAGTTAAAATAAGGCTAGTCCGTTATCAACTTGAAAAACTGGCACCGAGTCGGTGCTTTTTTGAATGCCAACGCCTCCTCCGCCTCCGCCGCCGGGCTCGTTTGGAGACGACGG
2276	ACCACGTCTCACACCGGCTTCCTCAGCCGCCGCCGCGTTTTAGAGCTAGAAATAGCAAGTTAAAATAAGGCTAGTCCGTTATCAACTTGAAAAACTGGCACCGAGTCGGTGCTTTTTTGAATGCCTACGCCTGCGCCGCCGCCGCCGCCGGTTCTGTTTGGAGACGACGG
2277	ACCACGTCTCACACCGGCTTCCTCAGCCGCCGCCGCGTTTTAGAGCTAGAAATAGCAAGTTAAAATAAGGCTAGTCCGTTATCAACTTGAAAAACTGGCACCGAGTCGGTGCTTTTTTGAATGCGAACGCGGCTGCAGCCGCCGCCGCCGGGAAGGTTTGGAGACGACGG
2278	ACCACGTCTCACACCGGCTTCCTCAGCCGCCGCCGCGTTTTAGAGCTAGAAATAGCAAGTTAAAATAAGGCTAGTCCGTTATCAACTTGAAAAACTGGCACCGAGTCGGTGCTTTTTTGAATGCGCACGCGTCCTCAGGGGCCGCTGCAGGGCCAGTTTGGAGACGACGG
2279	ACCACGTCTCACACCGGCTTCCTCAGCCGCCGCCGCGTTTTAGAGCTAGAAATAGCAAGTTAAAATAAGGCTAGTCCGTTATCAACTTGAAAAACTGGCACCGAGTCGGTGCTTTTTTGAATGCTAACGCGTCCTCCGCCGCCGCCGCCGGCCCAGTTTGGAGACGACGG
2280	ACCACGTCTCACACCGGCTTCCTCAGCCGCCGCCGCGTTTTAGAGCTAGAAATAGCAAGTTAAAATAAGGCTAGTCCGTTATCAACTTGAAAAACTGGCACCGAGTCGGTGCTTTTTTGAATGCTCACGCGTCTTCTCCCGCCGCCGCGGGCGGCGTTTGGAGACGACGG
2281	ACCACGTCTCACACCGGCTTCCTCAGCCGCCGCCGCGTTTTAGAGCTAGAAATAGCAAGTTAAAATAAGGCTAGTCCGTTATCAACTTGAAAAACTGGCACCGAGTCGGTGCTTTTTTGAATGCTGACGCTACCACTGCCACCGCCGCAGGAGCCGTTTGGAGACGACGG
2282	ACCACGTCTCACACCGGCTTCCTCAGCCGCCGCCGCGTTTTAGAGCTAGAAATAGCAAGTTAAAATAAGGCTAGTCCGTTATCAACTTGAAAAACTGGCACCGAGTCGGTGCTTTTTTGAATGCTTACGCTCACTCAGCTGCAGCCGCTGGCACAGTTTGGAGACGACGG
2283	ACCACGTCTCACACCGGCTTCCTCAGCCGCCGCCGCGTTTTAGAGCTAGAAATAGCAAGTTAAAATAAGGCTAGTCCGTTATCAACTTGAAAAACTGGCACCGAGTCGGTGCTTTTTTGAATGGCGACGCTCCCTCCGCAGCCGGCGCCGGGGAGGTTTGGAGACGACGG
2284	ACCACGTCTCACACCGGCTTCCTCAGCCGCCGCCGCGTTTTAGAGCTAGAAATAGCAAGTTAAAATAAGGCTAGTCCGTTATCAACTTGAAAAACTGGCACCGAGTCGGTGCTTTTTTGAATGGCTACGCTCCCTCGGCCGCAGCAGCAGGCCATGTTTGGAGACGACGG
2285	ACCACGTCTCACACCGGCTTCCTCAGCCGCCGCCGCGTTTTAGAGCTAGAAATAGCAAGTTAAAATAAGGCTAGTCCGTTATCAACTTGAAAAACTGGCACCGAGTCGGTGCTTTTTTGAATGGTCACGCTCCTCCAGCCGCCGCCGCTGGAAGGGTTTGGAGACGACGG
2286	ACCACGTCTCACACCGGCTTCCTCAGCCGCCGCCGCGTTTTAGAGCTAGAAATAGCAAGTTAAAATAAGGCTAGTCCGTTATCAACTTGAAAAACTGGCACCGAGTCGGTGCTTTTTTGAATGGTTACGCTGACGCCGCCGCCGCCGCGGGAGGAGTTTGGAGACGACGG
2287	ACCACGTCTCACACCGGCTTCCTCAGCCGCCGCCGCGTTTTAGAGCTAGAAATAGCAAGTTAAAATAAGGCTAGTCCGTTATCAACTTGAAAAACTGGCACCGAGTCGGTGCTTTTTTGAATGTATACGCTGCCACCGCCGCCGCCGCAGGCTCCGTTTGGAGACGACGG
2288	ACCACGTCTCACACCGGCTTCCTCAGCCGCCGCCGCGTTTTAGAGCTAGAAATAGCAAGTTAAAATAAGGCTAGTCCGTTATCAACTTGAAAAACTGGCACCGAGTCGGTGCTTTTTTGAATGTCAACGCTGCCCCAGCCTCCGCCTCAGGGCCAGTTTGGAGACGACGG
2289	ACCACGTCTCACACCGGCTTCCTCAGCCGCCGCCGCGTTTTAGAGCTAGAAATAGCAAGTTAAAATAAGGCTAGTCCGTTATCAACTTGAAAAACTGGCACCGAGTCGGTGCTTTTTTGAATGTCGACGCTGCCCCCGCCGCCGCCTCCGGGCGGGTTTGGAGACGACGG
2290	ACCACGTCTCACACCGGCTTCCTCAGCCGCCGCCGCGTTTTAGAGCTAGAAATAGCAAGTTAAAATAAGGCTAGTCCGTTATCAACTTGAAAAACTGGCACCGAGTCGGTGCTTTTTTGAATGTGCACGCTGCCGCCGCCGCAGCCGCCGGCTCCGTTTGGAGACGACGG
2291	ACCACGTCTCACACCGGCTTCCTCAGCCGCCGCCGCGTTTTAGAGCTAGAAATAGCAAGTTAAAATAAGGCTAGTCCGTTATCAACTTGAAAAACTGGCACCGAGTCGGTGCTTTTTTGAATGTTGACGCTGCCGCCGCCGCCGCCGGGGGCGTCGTTTGGAGACGACGG
2292	ACCACGTCTCACACCGGCTTCCTCAGCCGCCGCCGCGTTTTAGAGCTAGAAATAGCAAGTTAAAATAAGGCTAGTCCGTTATCAACTTGAAAAACTGGCACCGAGTCGGTGCTTTTTTGAATTAAGACGCTGCCGCCGCCGCCGCCGTGGGTGCCGTTTGGAGACGACGG
2293	ACCACGTCTCACACCGGCTTCCTCAGCCGCCGCCGCGTTTTAGAGCTAGAAATAGCAAGTTAAAATAAGGCTAGTCCGTTATCAACTTGAAAAACTGGCACCGAGTCGGTGCTTTTTTGAATTAATACGCTGCCGCCGCCGCCGCTGCCGGAGCGGTTTGGAGACGACGG
2294	ACCACGTCTCACACCGGCTTCCTCAGCCGCCGCCGCGTTTTAGAGCTAGAAATAGCAAGTTAAAATAAGGCTAGTCCGTTATCAACTTGAAAAACTGGCACCGAGTCGGTGCTTTTTTGAATTAGAACGCTGCCGCGGCCGCCGCCGCCGGGGGGGTTTGGAGACGACGG
2295	ACCACGTCTCACACCGGCTTCCTCAGCCGCCGCCGCGTTTTAGAGCTAGAAATAGCAAGTTAAAATAAGGCTAGTCCGTTATCAACTTGAAAAACTGGCACCGAGTCGGTGCTTTTTTGAATTAGCACGCTGCCGCTGCCGCCGCCGCCGGACGTGTTTGGAGACGACGG
2296	ACCACGTCTCACACCGGCTTCCTCAGCCGCCGCCGCGTTTTAGAGCTAGAAATAGCAAGTTAAAATAAGGCTAGTCCGTTATCAACTTGAAAAACTGGCACCGAGTCGGTGCTTTTTTGAATTAGTACGCTGCCTCGGCCGCTGCCGCGGGAGGGGTTTGGAGACGACGG
2297	ACCACGTCTCACACCGGCTTCCTCAGCCGCCGCCGCGTTTTAGAGCTAGAAATAGCAAGTTAAAATAAGGCTAGTCCGTTATCAACTTGAAAAACTGGCACCGAGTCGGTGCTTTTTTGAATTATAACGCTGCGTCGGCCGCCGCCGCCGGGATTGTTTGGAGACGACGG
2298	ACCACGTCTCACACCGGCTTCCTCAGCCGCCGCCGCGTTTTAGAGCTAGAAATAGCAAGTTAAAATAAGGCTAGTCCGTTATCAACTTGAAAAACTGGCACCGAGTCGGTGCTTTTTTGAATTATCACGCTGCTGCAGCAGCCGCCGCAGGGAATGTTTGGAGACGACGG
2299	ACCACGTCTCACACCGGCTTCCTCAGCCGCCGCCGCGTTTTAGAGCTAGAAATAGCAAGTTAAAATAAGGCTAGTCCGTTATCAACTTGAAAAACTGGCACCGAGTCGGTGCTTTTTTGAATTATTACGCTGGCTCAGCCGCCGGCGCAGGCCGAGTTTGGAGACGACGG
2300	ACCACGTCTCACACCGGCTTCCTCAGCCGCCGCCGCGTTTTAGAGCTAGAAATAGCAAGTTAAAATAAGGCTAGTCCGTTATCAACTTGAAAAACTGGCACCGAGTCGGTGCTTTTTTGAATTCACACGCTTCCCCAGCAGCCACTGCTGGGCACGTTTGGAGACGACGG
2301	ACCACGTCTCACACCGGCTTCCTCAGCCGCCGCCGCGTTTTAGAGCTAGAAATAGCAAGTTAAAATAAGGCTAGTCCGTTATCAACTTGAAAAACTGGCACCGAGTCGGTGCTTTTTTGAATTCAGACGCTTCCCCAGCCGCCCGCGCTGGAGCCGTTTGGAGACGACGG
2302	ACCACGTCTCACACCGGCTTCCTCAGCCGCCGCCGCGTTTTAGAGCTAGAAATAGCAAGTTAAAATAAGGCTAGTCCGTTATCAACTTGAAAAACTGGCACCGAGTCGGTGCTTTTTTGAATTCGAACGCTTCCCCAGTCTCTGCCGCGGGAGCCGTTTGGAGACGACGG
2303	ACCACGTCTCACACCGGCTTCCTCAGCCGCCGCCGCGTTTTAGAGCTAGAAATAGCAAGTTAAAATAAGGCTAGTCCGTTATCAACTTGAAAAACTGGCACCGAGTCGGTGCTTTTTTGAATTCGCACGCTTCCCCCGCTGTCGCCGCCGGCAACGTTTGGAGACGACGG
2304	ACCACGTCTCACACCGGCTTCCTCAGCCGCCGCCGCGTTTTAGAGCTAGAAATAGCAAGTTAAAATAAGGCTAGTCCGTTATCAACTTGAAAAACTGGCACCGAGTCGGTGCTTTTTTGAATTCTAACGCTTCCGCAGCTGCTGCTGCAGGGCTTGTTTGGAGACGACGG
2305	ACCACGTCTCACACCGGCTTCCTCAGCCGCCGCCGCGTTTTAGAGCTAGAAATAGCAAGTTAAAATAAGGCTAGTCCGTTATCAACTTGAAAAACTGGCACCGAGTCGGTGCTTTTTTGAATTCTGACGCTTCCGGGGCCGCCGCCGGGGGCCGTGTTTGGAGACGACGG
2306	ACCACGTCTCACACCGGCTTCCTCAGCCGCCGCCGCGTTTTAGAGCTAGAAATAGCAAGTTAAAATAAGGCTAGTCCGTTATCAACTTGAAAAACTGGCACCGAGTCGGTGCTTTTTTGAATTGCAACGCTTCCGGGGCCGCCGCCTCTGGAAGGGTTTGGAGACGACGG
2307	ACCACGTCTCACACCGGCTTCCTCAGCCGCCGCCGCGTTTTAGAGCTAGAAATAGCAAGTTAAAATAAGGCTAGTCCGTTATCAACTTGAAAAACTGGCACCGAGTCGGTGCTTTTTTGAATTGCGACGCTTCCTCACCCCGCCCCGCAGGGCCAGTTTGGAGACGACGG
2308	ACCACGTCTCACACCGGCTTCCTCAGCCGCCGCCGCGTTTTAGAGCTAGAAATAGCAAGTTAAAATAAGGCTAGTCCGTTATCAACTTGAAAAACTGGCACCGAGTCGGTGCTTTTTTGAATTGGAACGCTTCCTCAGCAGCTTCCGCAGGCAGCGTTTGGAGACGACGG
2309	ACCACGTCTCACACCGGCTTCCTCAGCCGCCGCCGCGTTTTAGAGCTAGAAATAGCAAGTTAAAATAAGGCTAGTCCGTTATCAACTTGAAAAACTGGCACCGAGTCGGTGCTTTTTTGAATTGTCACGCTTCCTCAGGCACAGCCCCAGGTATGGTTTGGAGACGACGG
2310	ACCACGTCTCACACCGGCTTCCTCAGCCGCCGCCGCGTTTTAGAGCTAGAAATAGCAAGTTAAAATAAGGCTAGTCCGTTATCAACTTGAAAAACTGGCACCGAGTCGGTGCTTTTTTGAATTGTGACGCTTCCTCAGGTGCGGCAGCTGGTCCAGTTTGGAGACGACGG
2311	ACCACGTCTCACACCGGCTTCCTCAGCCGCCGCCGCGTTTTAGAGCTAGAAATAGCAAGTTAAAATAAGGCTAGTCCGTTATCAACTTGAAAAACTGGCACCGAGTCGGTGCTTTTTTGACAACACACGCTTCCTCATCCGCTTCCACTGGACACGTTTGGAGACGACGG
2312	ACCACGTCTCACACCGGCTTCCTCAGCCGCCGCCGCGTTTTAGAGCTAGAAATAGCAAGTTAAAATAAGGCTAGTCCGTTATCAACTTGAAAAACTGGCACCGAGTCGGTGCTTTTTTGACAACCGACGCTTCCTCCCCCGGGGCCGCAGGCCTCGTTTGGAGACGACGG
2313	ACCACGTCTCACACCGGCTTCCTCAGCCGCCGCCGCGTTTTAGAGCTAGAAATAGCAAGTTAAAATAAGGCTAGTCCGTTATCAACTTGAAAAACTGGCACCGAGTCGGTGCTTTTTTGACAACCTACGCTTCCTCCGCCGTCGCGCCCGGGGCCGTTTGGAGACGACGG
2314	ACCACGTCTCACACCGGCTTCCTCAGCCGCCGCCGCGTTTTAGAGCTAGAAATAGCAAGTTAAAATAAGGCTAGTCCGTTATCAACTTGAAAAACTGGCACCGAGTCGGTGCTTTTTTGACAACGCACGCTTCCTCTACCGCCACTGCTGGGAAGGTTTGGAGACGACGG
2315	ACCACGTCTCACACCGGCTTCCTCAGCCGCCGCCGCGTTTTAGAGCTAGAAATAGCAAGTTAAAATAAGGCTAGTCCGTTATCAACTTGAAAAACTGGCACCGAGTCGGTGCTTTTTTGACAACGTACGCTTCCTCTTCCGCCTTCGCAGGCACTGTTTGGAGACGACGG
2316	ACCACGTCTCACACCGGCTTCCTCAGCCGCCGCCGCGTTTTAGAGCTAGAAATAGCAAGTTAAAATAAGGCTAGTCCGTTATCAACTTGAAAAACTGGCACCGAGTCGGTGCTTTTTTGACAACTAACGCTTCCTGAGCAGCCTCTGCAGGCTCCGTTTGGAGACGACGG
2317	ACCACGTCTCACACCGGCTTCCTCAGCCGCCGCCGCGTTTTAGAGCTAGAAATAGCAAGTTAAAATAAGGCTAGTCCGTTATCAACTTGAAAAACTGGCACCGAGTCGGTGCTTTTTTGACAACTCACGCTTCCTGCACCGCGGCCGCCGGCATCGTTTGGAGACGACGG
2318	ACCACGTCTCACACCGGCTTCCTCAGCCGCCGCCGCGTTTTAGAGCTAGAAATAGCAAGTTAAAATAAGGCTAGTCCGTTATCAACTTGAAAAACTGGCACCGAGTCGGTGCTTTTTTGACAACTGACGCTTCCTTAGCCAGCTCCGCTGGGAACGTTTGGAGACGACGG
2319	ACCACGTCTCACACCGGCTTCCTCAGCCGCCGCCGCGTTTTAGAGCTAGAAATAGCAAGTTAAAATAAGGCTAGTCCGTTATCAACTTGAAAAACTGGCACCGAGTCGGTGCTTTTTTGACAACTTACGCTTCTGCCGCTGCCGCCGCCGGATCCGTTTGGAGACGACGG
2320	ACCACGTCTCACACCGGCTTCCTCAGCCGCCGCCGCGTTTTAGAGCTAGAAATAGCAAGTTAAAATAAGGCTAGTCCGTTATCAACTTGAAAAACTGGCACCGAGTCGGTGCTTTTTTGACAAGACACGCTTCTTCAGCCGCCACTCCGGGGACAGTTTGGAGACGACGG
2321	ACCACGTCTCACACCGGCTTCCTCAGCCGCCGCCGCGTTTTAGAGCTAGAAATAGCAAGTTAAAATAAGGCTAGTCCGTTATCAACTTGAAAAACTGGCACCGAGTCGGTGCTTTTTTGACAAGATACGCTTTCTCAGGCCCCGCCCCCGGTCCGGTTTGGAGACGACGG
2322	ACCACGTCTCACACCGGCTTCCTCAGCCGCCGCCGCGTTTTAGAGCTAGAAATAGCAAGTTAAAATAAGGCTAGTCCGTTATCAACTTGAAAAACTGGCACCGAGTCGGTGCTTTTTTGACAAGTAACGGGTCCCCAGCCCCCGCCGCGGGGCCGGTTTGGAGACGACGG
2323	ACCACGTCTCACACCGGCTTCCTCAGCCGCCGCCGCGTTTTAGAGCTAGAAATAGCAAGTTAAAATAAGGCTAGTCCGTTATCAACTTGAAAAACTGGCACCGAGTCGGTGCTTTTTTGACAATACACTATTCCTCCGCCGCCGCCTCTGGGTCTGTTTGGAGACGACGG
2324	ACCACGTCTCACACCGGCTTCCTCAGCCGCCGCCGCGTTTTAGAGCTAGAAATAGCAAGTTAAAATAAGGCTAGTCCGTTATCAACTTGAAAAACTGGCACCGAGTCGGTGCTTTTTTGACAATCAACTCCGCCTCCGCCGCCGCCGCCGGGGCCGTTTGGAGACGACGG
2325	ACCACGTCTCACACCGGCTTCCTCAGCCGCCGCCGCGTTTTAGAGCTAGAAATAGCAAGTTAAAATAAGGCTAGTCCGTTATCAACTTGAAAAACTGGCACCGAGTCGGTGCTTTTTTGACAATCTACTCCTCCTCCGCCGCCGCCGCCGGTCGCGTTTGGAGACGACGG
2326	ACCACGTCTCACACCGGCTTCCTCAGCCGCCGCCGCGTTTTAGAGCTAGAAATAGCAAGTTAAAATAAGGCTAGTCCGTTATCAACTTGAAAAACTGGCACCGAGTCGGTGCTTTTTTGACAATGAACTCTGCAGCAGCCGCCGCCGCCGGGTTCGTTTGGAGACGACGG
2327	ACCACGTCTCACACCGGCTTCCTCAGCCGCCGCCGCGTTTTAGAGCTAGAAATAGCAAGTTAAAATAAGGCTAGTCCGTTATCAACTTGAAAAACTGGCACCGAGTCGGTGCTTTTTTGACACAACACTCTTCCTCAGCTGCCGCCCCAGGACGCGTTTGGAGACGACGG
2328	ACCACGTCTCACACCGGCTTCCTCAGCCGCCGCCGCGTTTTAGAGCTAGAAATAGCAAGTTAAAATAAGGCTAGTCCGTTATCAACTTGAAAAACTGGCACCGAGTCGGTGCTTTTTTGACACACAACTCTTCCTCAGCTGGAGCCGCTGGGCAAGTTTGGAGACGACGG
2329	ACCACGTCTCACACCGGCTTCCTCAGCCGCCGCCGCGTTTTAGAGCTAGAAATAGCAAGTTAAAATAAGGCTAGTCCGTTATCAACTTGAAAAACTGGCACCGAGTCGGTGCTTTTTTGACACACCACACCACCACAGCCGCCGCCGCTGGCCAGGTTTGGAGACGACGG
2330	ACCACGTCTCACACCGGCTTCCTCAGCCGCCGCCGCGTTTTAGAGCTAGAAATAGCAAGTTAAAATAAGGCTAGTCCGTTATCAACTTGAAAAACTGGCACCGAGTCGGTGCTTTTTTGACACAGGACCCCTCCGCCGCCGCCGCCGCGGGCCCCGTTTGGAGACGACGG
2331	ACCACGTCTCACACCGGCTTCCTCAGCCGCCGCCGCGTTTTAGAGCTAGAAATAGCAAGTTAAAATAAGGCTAGTCCGTTATCAACTTGAAAAACTGGCACCGAGTCGGTGCTTTTTTGACACAGTACCCCTCCTCCCCCGCCGCCGCCGGGGCAGTTTGGAGACGACGG
2332	ACCACGTCTCACACCGGCTTCCTCAGCCGCCGCCGCGTTTTAGAGCTAGAAATAGCAAGTTAAAATAAGGCTAGTCCGTTATCAACTTGAAAAACTGGCACCGAGTCGGTGCTTTTTTGACACATCACCCCTGCGCAGCCGCCGCCGCCGGGCGCGTTTGGAGACGACGG
2333	ACCACGTCTCACACCGGCTTCCTCAGCCGCCGCCGCGTTTTAGAGCTAGAAATAGCAAGTTAAAATAAGGCTAGTCCGTTATCAACTTGAAAAACTGGCACCGAGTCGGTGCTTTTTTGACACATGACCCTACCTCAGCCGCCGCCCACGGCACGGTTTGGAGACGACGG
2334	ACCACGTCTCACACCGGCTTCCTCAGCCGCCGCCGCGTTTTAGAGCTAGAAATAGCAAGTTAAAATAAGGCTAGTCCGTTATCAACTTGAAAAACTGGCACCGAGTCGGTGCTTTTTTGACACATTACCCTCCCGCAGCCGCCGCCGCAGGCAGCGTTTGGAGACGACGG
2335	ACCACGTCTCACACCGGCTTCCTCAGCCGCCGCCGCGTTTTAGAGCTAGAAATAGCAAGTTAAAATAAGGCTAGTCCGTTATCAACTTGAAAAACTGGCACCGAGTCGGTGCTTTTTTGACACCGAACCCTGCCTCAGCCTCCGCCTCTGGAGTAGTTTGGAGACGACGG
2336	ACCACGTCTCACACCGGCTTCCTCAGCCGCCGCCGCGTTTTAGAGCTAGAAATAGCAAGTTAAAATAAGGCTAGTCCGTTATCAACTTGAAAAACTGGCACCGAGTCGGTGCTTTTTTGACACCGCACCCTTCCTCAGACGCCGAGGCTGGGCTGGTTTGGAGACGACGG
2337	ACCACGTCTCACACCGGCTTCCTCAGCCGCCGCCGCGTTTTAGAGCTAGAAATAGCAAGTTAAAATAAGGCTAGTCCGTTATCAACTTGAAAAACTGGCACCGAGTCGGTGCTTTTTTGACACCGTACCCTTCTTATGCCGCCGCCGCAGGGGTGGTTTGGAGACGACGG
2338	ACCACGTCTCACACCGGCTTCCTCAGCCGCCGCCGCGTTTTAGAGCTAGAAATAGCAAGTTAAAATAAGGCTAGTCCGTTATCAACTTGAAAAACTGGCACCGAGTCGGTGCTTTTTTGACACCTGACGATGCCGCCGCCGCCGCCGCAGGGCCCGTTTGGAGACGACGG
2339	ACCACGTCTCACACCGGCTTCCTCAGCCGCCGCCGCGTTTTAGAGCTAGAAATAGCAAGTTAAAATAAGGCTAGTCCGTTATCAACTTGAAAAACTGGCACCGAGTCGGTGCTTTTTTGACACCTTACGCAGCAGCAGCCGCCGCCGCAGGAGGAGTTTGGAGACGACGG
2340	ACCACGTCTCACACCGGCTTCCTCAGCCGCCGCCGCGTTTTAGAGCTAGAAATAGCAAGTTAAAATAAGGCTAGTCCGTTATCAACTTGAAAAACTGGCACCGAGTCGGTGCTTTTTTGACACGACACGCAGCCACAGCCGCCGCCGGAGGGGGGGTTTGGAGACGACGG
2341	ACCACGTCTCACACCGGCTTCCTCAGCCGCCGCCGCGTTTTAGAGCTAGAAATAGCAAGTTAAAATAAGGCTAGTCCGTTATCAACTTGAAAAACTGGCACCGAGTCGGTGCTTTTTTGACACGTGACGCAGCCCCCGCCGCCGCCGCCGGACGCGTTTGGAGACGACGG
2342	ACCACGTCTCACACCGGCTTCCTCAGCCGCCGCCGCGTTTTAGAGCTAGAAATAGCAAGTTAAAATAAGGCTAGTCCGTTATCAACTTGAAAAACTGGCACCGAGTCGGTGCTTTTTTGACACGTTACGCAGCCGCTGCCGCCGCCGCGGGAGCCGTTTGGAGACGACGG
2343	ACCACGTCTCACACCGGCTTCCTCAGCCGCCGCCGCGTTTTAGAGCTAGAAATAGCAAGTTAAAATAAGGCTAGTCCGTTATCAACTTGAAAAACTGGCACCGAGTCGGTGCTTTTTTGACACTAGACGCAGCCTCAGCCGCTGGCGCTGGGATTGTTTGGAGACGACGG
2344	ACCACGTCTCACACCGGCTTCCTCAGCCGCCGCCGCGTTTTAGAGCTAGAAATAGCAAGTTAAAATAAGGCTAGTCCGTTATCAACTTGAAAAACTGGCACCGAGTCGGTGCTTTTTTGACACTCGACGCCCCCACCGCCGCCGCCGCCGGGACTGTTTGGAGACGACGG
2345	ACCACGTCTCACACCGGCTTCCTCAGCCGCCGCCGCGTTTTAGAGCTAGAAATAGCAAGTTAAAATAAGGCTAGTCCGTTATCAACTTGAAAAACTGGCACCGAGTCGGTGCTTTTTTGACACTCTACGCCCCCCCCGCCGCCGCCGCCGGGCGGGTTTGGAGACGACGG
2346	ACCACGTCTCACACCGGCTTCCTCAGCCGCCGCCGCGTTTTAGAGCTAGAAATAGCAAGTTAAAATAAGGCTAGTCCGTTATCAACTTGAAAAACTGGCACCGAGTCGGTGCTTTTTTGACACTGAACGCCCCCTCAGGCGGCGCCGCGGGCAGCGTTTGGAGACGACGG
2347	ACCACGTCTCACACCGGCTTCCTCAGCCGCCGCCGCGTTTTAGAGCTAGAAATAGCAAGTTAAAATAAGGCTAGTCCGTTATCAACTTGAAAAACTGGCACCGAGTCGGTGCTTTTTTGACACTGCACGCCGCCACCGCCGCCGCCGCCGGGGGAGTTTGGAGACGACGG
2348	ACCACGTCTCACACCGGCTTCCTCAGCCGCCGCCGCGTTTTAGAGCTAGAAATAGCAAGTTAAAATAAGGCTAGTCCGTTATCAACTTGAAAAACTGGCACCGAGTCGGTGCTTTTTTGACACTGGACGCCGCCGCAGCCGCCGCCGCTGGGCAGGTTTGGAGACGACGG
2349	ACCACGTCTCACACCGGCTTCCTCAGCCGCCGCCGCGTTTTAGAGCTAGAAATAGCAAGTTAAAATAAGGCTAGTCCGTTATCAACTTGAAAAACTGGCACCGAGTCGGTGCTTTTTTGACAGGCCACGCCGCCGCTGCCGCCGCCGCAGGCCGGGTTTGGAGACGACGG
2350	ACCACGTCTCACACCGGCTTCCTCAGCCGCCGCCGCGTTTTAGAGCTAGAAATAGCAAGTTAAAATAAGGCTAGTCCGTTATCAACTTGAAAAACTGGCACCGAGTCGGTGCTTTTTTGACAGGCTACGCCGCCGCTGCCGCCGCCGCTGGGGACGTTTGGAGACGACGG
2351	ACCACGTCTCACACCGGCTTCCTCAGCCGCCGCCGCGTTTTAGAGCTAGAAATAGCAAGTTAAAATAAGGCTAGTCCGTTATCAACTTGAAAAACTGGCACCGAGTCGGTGCTTTTTTGACAGGTAACGCCGCCTCCGCCGCCGCCCCCGGCGCCGTTTGGAGACGACGG
2352	ACCACGTCTCACACCGGCTTCCTCAGCCGCCGCCGCGTTTTAGAGCTAGAAATAGCAAGTTAAAATAAGGCTAGTCCGTTATCAACTTGAAAAACTGGCACCGAGTCGGTGCTTTTTTGACAGTACACGCCTCCACAGCCCCCGCCGCCGGATTTGTTTGGAGACGACGG
2353	ACCACGTCTCACACCGGCTTCCTCAGCCGCCGCCGCGTTTTAGAGCTAGAAATAGCAAGTTAAAATAAGGCTAGTCCGTTATCAACTTGAAAAACTGGCACCGAGTCGGTGCTTTTTTGACAGTAGACGCCTCCGCAGCCGCCGCCGTGGGGAGTGTTTGGAGACGACGG
2354	ACCACGTCTCACACCGGCTTCCTCAGCCGCCGCCGCGTTTTAGAGCTAGAAATAGCAAGTTAAAATAAGGCTAGTCCGTTATCAACTTGAAAAACTGGCACCGAGTCGGTGCTTTTTTGACAGTATACGCCTCCGCTGCCGCCGCCCCCGGTGCCGTTTGGAGACGACGG
2355	ACCACGTCTCACACCGGCTTCCTCAGCCGCCGCCGCGTTTTAGAGCTAGAAATAGCAAGTTAAAATAAGGCTAGTCCGTTATCAACTTGAAAAACTGGCACCGAGTCGGTGCTTTTTTGACAGTCAACGCCTCCTCGGCCGCCGGCGCCGGCGCCGTTTGGAGACGACGG
2356	ACCACGTCTCACACCGGCTTCCTCAGCCGCCGCCGCGTTTTAGAGCTAGAAATAGCAAGTTAAAATAAGGCTAGTCCGTTATCAACTTGAAAAACTGGCACCGAGTCGGTGCTTTTTTGACAGTCTACGCCTCTGCTGCCGCCGCCGCGGGTTGCGTTTGGAGACGACGG
2357	ACCACGTCTCACACCGGCTTCCTCAGCCGCCGCCGCGTTTTAGAGCTAGAAATAGCAAGTTAAAATAAGGCTAGTCCGTTATCAACTTGAAAAACTGGCACCGAGTCGGTGCTTTTTTGACAGTGCACGCCTCTTTAGCCACCGCCGCCGGCAGCGTTTGGAGACGACGG
2358	ACCACGTCTCACACCGGCTTCCTCAGCCGCCGCCGCGTTTTAGAGCTAGAAATAGCAAGTTAAAATAAGGCTAGTCCGTTATCAACTTGAAAAACTGGCACCGAGTCGGTGCTTTTTTGACAGTGGACGCCTTCGCCGCCGCCGCCGCCGGCGCTGTTTGGAGACGACGG
2359	ACCACGTCTCACACCGGCTTCCTCAGCCGCCGCCGCGTTTTAGAGCTAGAAATAGCAAGTTAAAATAAGGCTAGTCCGTTATCAACTTGAAAAACTGGCACCGAGTCGGTGCTTTTTTGACAGTGTACGCGGGCTCAGCCGGCGCCGCGGGGTCGGTTTGGAGACGACGG
2360	ACCACGTCTCACACCGGCTTCCTCAGCCGCCGCCGCGTTTTAGAGCTAGAAATAGCAAGTTAAAATAAGGCTAGTCCGTTATCAACTTGAAAAACTGGCACCGAGTCGGTGCTTTTTTGACAGTTCACGCGTCCCCAGCCGTCGGCGCAGGAAGTGTTTGGAGACGACGG
2361	ACCACGTCTCACACCGGCTTCCTCAGCCGCCGCCGCGTTTTAGAGCTAGAAATAGCAAGTTAAAATAAGGCTAGTCCGTTATCAACTTGAAAAACTGGCACCGAGTCGGTGCTTTTTTGACATACAACGCTACCGCCGCCGCCGCCGCAGGGCCCGTTTGGAGACGACGG
2362	ACCACGTCTCACACCGGCTTCCTCAGCCGCCGCCGCGTTTTAGAGCTAGAAATAGCAAGTTAAAATAAGGCTAGTCCGTTATCAACTTGAAAAACTGGCACCGAGTCGGTGCTTTTTTGACATACCACGCTACCGCCGCCGCCGCCGCCGGACCGGTTTGGAGACGACGG
2363	ACCACGTCTCACACCGGCTTCCTCAGCCGCCGCCGCGTTTTAGAGCTAGAAATAGCAAGTTAAAATAAGGCTAGTCCGTTATCAACTTGAAAAACTGGCACCGAGTCGGTGCTTTTTTGACATACGACGCTACCGCCGCCGCCGCCGGGGGTGGGGTTTGGAGACGACGG
2364	ACCACGTCTCACACCGGCTTCCTCAGCCGCCGCCGCGTTTTAGAGCTAGAAATAGCAAGTTAAAATAAGGCTAGTCCGTTATCAACTTGAAAAACTGGCACCGAGTCGGTGCTTTTTTGACATACTACGCTACCTGAGGCGCCGCCCCCGGGCCCGTTTGGAGACGACGG
2365	ACCACGTCTCACACCGGCTTCCTCAGCCGCCGCCGCGTTTTAGAGCTAGAAATAGCAAGTTAAAATAAGGCTAGTCCGTTATCAACTTGAAAAACTGGCACCGAGTCGGTGCTTTTTTGACATAGAACGCTCCCGCAGCCGCCCCCGCCGGTTCCGTTTGGAGACGACGG
2366	ACCACGTCTCACACCGGCTTCCTCAGCCGCCGCCGCGTTTTAGAGCTAGAAATAGCAAGTTAAAATAAGGCTAGTCCGTTATCAACTTGAAAAACTGGCACCGAGTCGGTGCTTTTTTGACATAGCACGCTCCCGCCGCAGCCGCCGCTGGGTCCGTTTGGAGACGACGG
2367	ACCACGTCTCACACCGGCTTCCTCAGCCGCCGCCGCGTTTTAGAGCTAGAAATAGCAAGTTAAAATAAGGCTAGTCCGTTATCAACTTGAAAAACTGGCACCGAGTCGGTGCTTTTTTGACATAGGACGCTCCCGCCGCCCCCGCCGCTGGAGAAGTTTGGAGACGACGG
2368	ACCACGTCTCACACCGGCTTCCTCAGCCGCCGCCGCGTTTTAGAGCTAGAAATAGCAAGTTAAAATAAGGCTAGTCCGTTATCAACTTGAAAAACTGGCACCGAGTCGGTGCTTTTTTGACATAGTACGCTCCCGCCGCCGCCGCCGCCGGGCCGGTTTGGAGACGACGG
2369	ACCACGTCTCACACCGGCTTCCTCAGCCGCCGCCGCGTTTTAGAGCTAGAAATAGCAAGTTAAAATAAGGCTAGTCCGTTATCAACTTGAAAAACTGGCACCGAGTCGGTGCTTTTTTGACATATAACGCTCCCGCCGCCGCCGCCGCTGGGCTCGTTTGGAGACGACGG
2370	ACCACGTCTCACACCGGCTTCCTCAGCCGCCGCCGCGTTTTAGAGCTAGAAATAGCAAGTTAAAATAAGGCTAGTCCGTTATCAACTTGAAAAACTGGCACCGAGTCGGTGCTTTTTTGACATATCACGCTCCCTCAGACGCTGCAGCTGGGACTGTTTGGAGACGACGG
2371	ACCACGTCTCACACCGGCTTCCTCAGCCGCCGCCGCGTTTTAGAGCTAGAAATAGCAAGTTAAAATAAGGCTAGTCCGTTATCAACTTGAAAAACTGGCACCGAGTCGGTGCTTTTTTGACATATGACGCTCCCTCTGCCGCCTCTGCAGGTCCTGTTTGGAGACGACGG
2372	ACCACGTCTCACACCGGCTTCCTCAGCCGCCGCCGCGTTTTAGAGCTAGAAATAGCAAGTTAAAATAAGGCTAGTCCGTTATCAACTTGAAAAACTGGCACCGAGTCGGTGCTTTTTTGACATATTACGCTGCAGCAGCCGCCGCTGCTGGGACTGTTTGGAGACGACGG
2373	ACCACGTCTCACACCGGCTTCCTCAGCCGCCGCCGCGTTTTAGAGCTAGAAATAGCAAGTTAAAATAAGGCTAGTCCGTTATCAACTTGAAAAACTGGCACCGAGTCGGTGCTTTTTTGACATCACACGCTGCCACAGCCTCCGCCCCGGGCCCCGTTTGGAGACGACGG
2374	ACCACGTCTCACACCGGCTTCCTCAGCCGCCGCCGCGTTTTAGAGCTAGAAATAGCAAGTTAAAATAAGGCTAGTCCGTTATCAACTTGAAAAACTGGCACCGAGTCGGTGCTTTTTTGACATCAGACGCTGCCCCCGGCGCCGCCGCGGGGCCTGTTTGGAGACGACGG
2375	ACCACGTCTCACACCGGCTTCCTCAGCCGCCGCCGCGTTTTAGAGCTAGAAATAGCAAGTTAAAATAAGGCTAGTCCGTTATCAACTTGAAAAACTGGCACCGAGTCGGTGCTTTTTTGACATCATACGCTGCCCCGGCCGCAGCCGCCGGGAACGTTTGGAGACGACGG
2376	ACCACGTCTCACACCGGCTTCCTCAGCCGCCGCCGCGTTTTAGAGCTAGAAATAGCAAGTTAAAATAAGGCTAGTCCGTTATCAACTTGAAAAACTGGCACCGAGTCGGTGCTTTTTTGACATCCGACGCTGCCCCGGCGGCCGCCGCCGGACCTGTTTGGAGACGACGG
2377	ACCACGTCTCACACCGGCTTCCTCAGCCGCCGCCGCGTTTTAGAGCTAGAAATAGCAAGTTAAAATAAGGCTAGTCCGTTATCAACTTGAAAAACTGGCACCGAGTCGGTGCTTTTTTGACATCCTACGCTGCCGCAGCCGCCGCCGCAGGAGCCGTTTGGAGACGACGG
2378	ACCACGTCTCACACCGGCTTCCTCAGCCGCCGCCGCGTTTTAGAGCTAGAAATAGCAAGTTAAAATAAGGCTAGTCCGTTATCAACTTGAAAAACTGGCACCGAGTCGGTGCTTTTTTGACATCGAACGCTGCCGCAGCGGCGGCCGCCGGAGCCGTTTGGAGACGACGG
2379	ACCACGTCTCACACCGGCTTCCTCAGCCGCCGCCGCGTTTTAGAGCTAGAAATAGCAAGTTAAAATAAGGCTAGTCCGTTATCAACTTGAAAAACTGGCACCGAGTCGGTGCTTTTTTGACATCGTACGCTGCCGCCGCCGCCGCCACCGGGGACGTTTGGAGACGACGG
2380	ACCACGTCTCACACCGGCTTCCTCAGCCGCCGCCGCGTTTTAGAGCTAGAAATAGCAAGTTAAAATAAGGCTAGTCCGTTATCAACTTGAAAAACTGGCACCGAGTCGGTGCTTTTTTGACATCTAACGCTGCCGCCGCCGCCGCTGCTGGCCGGGTTTGGAGACGACGG
2381	ACCACGTCTCACACCGGCTTCCTCAGCCGCCGCCGCGTTTTAGAGCTAGAAATAGCAAGTTAAAATAAGGCTAGTCCGTTATCAACTTGAAAAACTGGCACCGAGTCGGTGCTTTTTTGACATCTTACGCTGCCGCGGCCGCCACCGCTGGCCGGGTTTGGAGACGACGG
2382	ACCACGTCTCACACCGGCTTCCTCAGCCGCCGCCGCGTTTTAGAGCTAGAAATAGCAAGTTAAAATAAGGCTAGTCCGTTATCAACTTGAAAAACTGGCACCGAGTCGGTGCTTTTTTGACATGACACGCTGCCGCTGCTGCCGCCGCCGGAGCCGTTTGGAGACGACGG
2383	ACCACGTCTCACACCGGCTTCCTCAGCCGCCGCCGCGTTTTAGAGCTAGAAATAGCAAGTTAAAATAAGGCTAGTCCGTTATCAACTTGAAAAACTGGCACCGAGTCGGTGCTTTTTTGACATGCCACGCTGCCTCAGCCTCCCCCGCAGGATGAGTTTGGAGACGACGG
2384	ACCACGTCTCACACCGGCTTCCTCAGCCGCCGCCGCGTTTTAGAGCTAGAAATAGCAAGTTAAAATAAGGCTAGTCCGTTATCAACTTGAAAAACTGGCACCGAGTCGGTGCTTTTTTGACATGTCACGCTGCCTCAGTTCCCGCCGCGGGGCCTGTTTGGAGACGACGG
2385	ACCACGTCTCACACCGGCTTCCTCAGCCGCCGCCGCGTTTTAGAGCTAGAAATAGCAAGTTAAAATAAGGCTAGTCCGTTATCAACTTGAAAAACTGGCACCGAGTCGGTGCTTTTTTGACATGTGACGCTGCCTCCCCCGCGGCCGCCGGGCAGGTTTGGAGACGACGG
2386	ACCACGTCTCACACCGGCTTCCTCAGCCGCCGCCGCGTTTTAGAGCTAGAAATAGCAAGTTAAAATAAGGCTAGTCCGTTATCAACTTGAAAAACTGGCACCGAGTCGGTGCTTTTTTGACATGTTACGCTGCCTCTGCCGCCGGCGCTGGGCAGGTTTGGAGACGACGG
2387	ACCACGTCTCACACCGGCTTCCTCAGCCGCCGCCGCGTTTTAGAGCTAGAAATAGCAAGTTAAAATAAGGCTAGTCCGTTATCAACTTGAAAAACTGGCACCGAGTCGGTGCTTTTTTGACATTACACGCTGCGGCCGCCGCCGCCGCCGGACCCGTTTGGAGACGACGG
2388	ACCACGTCTCACACCGGCTTCCTCAGCCGCCGCCGCGTTTTAGAGCTAGAAATAGCAAGTTAAAATAAGGCTAGTCCGTTATCAACTTGAAAAACTGGCACCGAGTCGGTGCTTTTTTGACATTAGACGCTGCGTCAGCCGCCGCCCTAGGTCGAGTTTGGAGACGACGG
2389	ACCACGTCTCACACCGGCTTCCTCAGCCGCCGCCGCGTTTTAGAGCTAGAAATAGCAAGTTAAAATAAGGCTAGTCCGTTATCAACTTGAAAAACTGGCACCGAGTCGGTGCTTTTTTGACATTATACGCTGCTGCAGCCGCCGCCGGGGGAGTCGTTTGGAGACGACGG
2390	ACCACGTCTCACACCGGCTTCCTCAGCCGCCGCCGCGTTTTAGAGCTAGAAATAGCAAGTTAAAATAAGGCTAGTCCGTTATCAACTTGAAAAACTGGCACCGAGTCGGTGCTTTTTTGACATTCCACGCTGCTGCAGCCGCCGCCTCCGGTGCTGTTTGGAGACGACGG
2391	ACCACGTCTCACACCGGCTTCCTCAGCCGCCGCCGCGTTTTAGAGCTAGAAATAGCAAGTTAAAATAAGGCTAGTCCGTTATCAACTTGAAAAACTGGCACCGAGTCGGTGCTTTTTTGACATTCTACGCTGCTTCAGGCGCCGCCACTGGGCCCGTTTGGAGACGACGG
2392	ACCACGTCTCACACCGGCTTCCTCAGCCGCCGCCGCGTTTTAGAGCTAGAAATAGCAAGTTAAAATAAGGCTAGTCCGTTATCAACTTGAAAAACTGGCACCGAGTCGGTGCTTTTTTGACATTGAACGCTGCTTCTGCCTCCGCCGCCGGCGCTGTTTGGAGACGACGG
2393	ACCACGTCTCACACCGGCTTCCTCAGCCGCCGCCGCGTTTTAGAGCTAGAAATAGCAAGTTAAAATAAGGCTAGTCCGTTATCAACTTGAAAAACTGGCACCGAGTCGGTGCTTTTTTGACATTGCACGCTGTCCCCGCCGCCGCCGCCGGACAGGTTTGGAGACGACGG
2394	ACCACGTCTCACACCGGCTTCCTCAGCCGCCGCCGCGTTTTAGAGCTAGAAATAGCAAGTTAAAATAAGGCTAGTCCGTTATCAACTTGAAAAACTGGCACCGAGTCGGTGCTTTTTTGACATTGGACGCTTCCATAGCCACCTCCGCTGGACTCGTTTGGAGACGACGG
2395	ACCACGTCTCACACCGGCTTCCTCAGCCGCCGCCGCGTTTTAGAGCTAGAAATAGCAAGTTAAAATAAGGCTAGTCCGTTATCAACTTGAAAAACTGGCACCGAGTCGGTGCTTTTTTGACCAACAACGCTTCCCCAGCCTCCGCTGCAGGTGTCGTTTGGAGACGACGG
2396	ACCACGTCTCACACCGGCTTCCTCAGCCGCCGCCGCGTTTTAGAGCTAGAAATAGCAAGTTAAAATAAGGCTAGTCCGTTATCAACTTGAAAAACTGGCACCGAGTCGGTGCTTTTTTGACCAAGAACGCTTCCGCCGCTGCCGCCACTGGTACAGTTTGGAGACGACGG
2397	ACCACGTCTCACACCGGCTTCCTCAGCCGCCGCCGCGTTTTAGAGCTAGAAATAGCAAGTTAAAATAAGGCTAGTCCGTTATCAACTTGAAAAACTGGCACCGAGTCGGTGCTTTTTTGACCAAGGACGCTTCCGGAGCCGCCGCCGCAGGAAGAGTTTGGAGACGACGG
2398	ACCACGTCTCACACCGGCTTCCTCAGCCGCCGCCGCGTTTTAGAGCTAGAAATAGCAAGTTAAAATAAGGCTAGTCCGTTATCAACTTGAAAAACTGGCACCGAGTCGGTGCTTTTTTGACCAAGTACGCTTCCTAAGCCGCCAGCCCAGGGCCAGTTTGGAGACGACGG
2399	ACCACGTCTCACACCGGCTTCCTCAGCCGCCGCCGCGTTTTAGAGCTAGAAATAGCAAGTTAAAATAAGGCTAGTCCGTTATCAACTTGAAAAACTGGCACCGAGTCGGTGCTTTTTTGACCAATAACGCTTCCTCACCAGCAGCCACAGGGCACGTTTGGAGACGACGG
2400	ACCACGTCTCACACCGGCTTCCTCAGCCGCCGCCGCGTTTTAGAGCTAGAAATAGCAAGTTAAAATAAGGCTAGTCCGTTATCAACTTGAAAAACTGGCACCGAGTCGGTGCTTTTTTGACCAATGACGCTTCCTCACCCACCACAGCTGGGACCGTTTGGAGACGACGG
2401	ACCACGTCTCACACCGGCTTCCTCAGCCGCCGCCGCGTTTTAGAGCTAGAAATAGCAAGTTAAAATAAGGCTAGTCCGTTATCAACTTGAAAAACTGGCACCGAGTCGGTGCTTTTTTGACCACCAACGCTTCCTCAGCAGCATCCACGGGCAGAGTTTGGAGACGACGG
2402	ACCACGTCTCACACCGGCTTCCTCAGCCGCCGCCGCGTTTTAGAGCTAGAAATAGCAAGTTAAAATAAGGCTAGTCCGTTATCAACTTGAAAAACTGGCACCGAGTCGGTGCTTTTTTGACCACGAACGCTTCCTCAGCCGGGTCCGGGGGCGTCGTTTGGAGACGACGG
2403	ACCACGTCTCACACCGGCTTCCTCAGCCGCCGCCGCGTTTTAGAGCTAGAAATAGCAAGTTAAAATAAGGCTAGTCCGTTATCAACTTGAAAAACTGGCACCGAGTCGGTGCTTTTTTGACCACGCACGCTTCCTCAGCGGCACCAGCTGGTCGCGTTTGGAGACGACGG
2404	ACCACGTCTCACACCGGCTTCCTCAGCCGCCGCCGCGTTTTAGAGCTAGAAATAGCAAGTTAAAATAAGGCTAGTCCGTTATCAACTTGAAAAACTGGCACCGAGTCGGTGCTTTTTTGACCACGGACGCTTCCTCAGCTGCGGGCCCAGGGCTAGTTTGGAGACGACGG
2405	ACCACGTCTCACACCGGCTTCCTCAGCCGCCGCCGCGTTTTAGAGCTAGAAATAGCAAGTTAAAATAAGGCTAGTCCGTTATCAACTTGAAAAACTGGCACCGAGTCGGTGCTTTTTTGACCACTAACGCTTCCTCAGGGGCCGCAACGGGCTCCGTTTGGAGACGACGG
2406	ACCACGTCTCACACCGGCTTCCTCAGCCGCCGCCGCGTTTTAGAGCTAGAAATAGCAAGTTAAAATAAGGCTAGTCCGTTATCAACTTGAAAAACTGGCACCGAGTCGGTGCTTTTTTGACCACTCACGCTTCCTCTGCGGGCGCTGCGGGAGGCGTTTGGAGACGACGG
2407	ACCACGTCTCACACCGGCTTCCTCAGCCGCCGCCGCGTTTTAGAGCTAGAAATAGCAAGTTAAAATAAGGCTAGTCCGTTATCAACTTGAAAAACTGGCACCGAGTCGGTGCTTTTTTGACCACTGACGCTTCCTCTGCTCGCGCCGCAGGTACTGTTTGGAGACGACGG
2408	ACCACGTCTCACACCGGCTTCCTCAGCCGCCGCCGCGTTTTAGAGCTAGAAATAGCAAGTTAAAATAAGGCTAGTCCGTTATCAACTTGAAAAACTGGCACCGAGTCGGTGCTTTTTTGACCACTTACGCTTCCTGGGCTGGCGCCGCTGGGTCCGTTTGGAGACGACGG
2409	ACCACGTCTCACACCGGCTTCCTCAGCCGCCGCCGCGTTTTAGAGCTAGAAATAGCAAGTTAAAATAAGGCTAGTCCGTTATCAACTTGAAAAACTGGCACCGAGTCGGTGCTTTTTTGACCAGCAACGCTTGCTGAGCTGCGGCCGCGGGAGGGGTTTGGAGACGACGG
2410	ACCACGTCTCACACCGGCTTCCTCAGCCGCCGCCGCGTTTTAGAGCTAGAAATAGCAAGTTAAAATAAGGCTAGTCCGTTATCAACTTGAAAAACTGGCACCGAGTCGGTGCTTTTTTGACCAGCCACGGTCCCTCAGCCGACGCCGCCGGGCCTGTTTGGAGACGACGG
2411	ACCACGTCTCACACCGGCTTCCTCAGCCGCCGCCGCGTTTTAGAGCTAGAAATAGCAAGTTAAAATAAGGCTAGTCCGTTATCAACTTGAAAAACTGGCACCGAGTCGGTGCTTTTTTGACCAGCTACGGTCCCTGAGCCGCCGCCGCGGGCGCAGTTTGGAGACGACGG
2412	ACCACGTCTCACACCGGCTTCCTCAGCCGCCGCCGCGTTTTAGAGCTAGAAATAGCAAGTTAAAATAAGGCTAGTCCGTTATCAACTTGAAAAACTGGCACCGAGTCGGTGCTTTTTTGACCAGGCACGGTGCCGCCGCCGCCGCCGCGGGCTCGGTTTGGAGACGACGG
2413	ACCACGTCTCACACCGGCTTCCTCAGCCGCCGCCGCGTTTTAGAGCTAGAAATAGCAAGTTAAAATAAGGCTAGTCCGTTATCAACTTGAAAAACTGGCACCGAGTCGGTGCTTTTTTGACCAGGTACGGTTCCTCTGCGGCCGCCCCTGGGTGCGTTTGGAGACGACGG
2414	ACCACGTCTCACACCGGCTTCCTCAGCCGCCGCCGCGTTTTAGAGCTAGAAATAGCAAGTTAAAATAAGGCTAGTCCGTTATCAACTTGAAAAACTGGCACCGAGTCGGTGCTTTTTTGACCATAGACTCCGCCTCTGCCGCCGCCGCCGGGGCGGTTTGGAGACGACGG
2415	ACCACGTCTCACACCGGCTTCCTCAGCCGCCGCCGCGTTTTAGAGCTAGAAATAGCAAGTTAAAATAAGGCTAGTCCGTTATCAACTTGAAAAACTGGCACCGAGTCGGTGCTTTTTTGACCATGAACTCCTCCTCGCCCGCCGCCGCCGGGAGCGTTTGGAGACGACGG
2416	ACCACGTCTCACACCGGCTTCCTCAGCCGCCGCCGCGTTTTAGAGCTAGAAATAGCAAGTTAAAATAAGGCTAGTCCGTTATCAACTTGAAAAACTGGCACCGAGTCGGTGCTTTTTTGACCATGCACTCTTCCTCAGCCTCCTCTGCAGGTGGTGTTTGGAGACGACGG
2417	ACCACGTCTCACACCGGCTTCCTCAGCCGCCGCCGCGTTTTAGAGCTAGAAATAGCAAGTTAAAATAAGGCTAGTCCGTTATCAACTTGAAAAACTGGCACCGAGTCGGTGCTTTTTTGACCATGGACTCTTCCTCATCCACCGCCACTGGGCCTGTTTGGAGACGACGG
2418	ACCACGTCTCACACCGGCTTCCTCAGCCGCCGCCGCGTTTTAGAGCTAGAAATAGCAAGTTAAAATAAGGCTAGTCCGTTATCAACTTGAAAAACTGGCACCGAGTCGGTGCTTTTTTGACCATGTACTCTTCCTTACCCGCCCCCGCTGGGCCCGTTTGGAGACGACGG
2419	ACCACGTCTCACACCGCATACAGTCAGTATCAATTCGTTTTAGAGCTAGAAATAGCAAGTTAAAATAAGGCTAGTCCGTTATCAACTTGAAAAACTGGCACCGAGTCGGTGCTTTTTTGACGCCACACGATACAGTCAGTGTCACTTCAGGACACGTTTGGAGACGACGG
2421	ACCACGTCTCACACCGCATACAGTCAGTATCAATTCGTTTTAGAGCTAGAAATAGCAAGTTAAAATAAGGCTAGTCCGTTATCAACTTGAAAAACTGGCACCGAGTCGGTGCTTTTTTGACCATTCACAACAAAGTCAGTTTCAATTCGGGGCTGGTTTGGAGACGACGG
2422	ACCACGTCTCACACCGCATACAGTCAGTATCAATTCGTTTTAGAGCTAGAAATAGCAAGTTAAAATAAGGCTAGTCCGTTATCAACTTGAAAAACTGGCACCGAGTCGGTGCTTTTTTGACCATTGACAATAAAGTCAGCAACAATTCAGGTCTTGTTTGGAGACGACGG
2423	ACCACGTCTCACACCGCATACAGTCAGTATCAATTCGTTTTAGAGCTAGAAATAGCAAGTTAAAATAAGGCTAGTCCGTTATCAACTTGAAAAACTGGCACCGAGTCGGTGCTTTTTTGACCGAACACAATACAGTAAGTCTCAATTCAGGGCTTGTTTGGAGACGACGG
2424	ACCACGTCTCACACCGCATACAGTCAGTATCAATTCGTTTTAGAGCTAGAAATAGCAAGTTAAAATAAGGCTAGTCCGTTATCAACTTGAAAAACTGGCACCGAGTCGGTGCTTTTTTGACCGACCACAATACAGTCAGTGTAACTTCAGGAGTTGTTTGGAGACGACGG
2425	ACCACGTCTCACACCGCATACAGTCAGTATCAATTCGTTTTAGAGCTAGAAATAGCAAGTTAAAATAAGGCTAGTCCGTTATCAACTTGAAAAACTGGCACCGAGTCGGTGCTTTTTTGACCGACGACAATACAGTCAGTGTCATTCCAGGATATGTTTGGAGACGACGG
2426	ACCACGTCTCACACCGCATACAGTCAGTATCAATTCGTTTTAGAGCTAGAAATAGCAAGTTAAAATAAGGCTAGTCCGTTATCAACTTGAAAAACTGGCACCGAGTCGGTGCTTTTTTGACCGAGCACAATTCAGTCGTTATCAATTCGGGCCAGGTTTGGAGACGACGG
2427	ACCACGTCTCACACCGCATACAGTCAGTATCAATTCGTTTTAGAGCTAGAAATAGCAAGTTAAAATAAGGCTAGTCCGTTATCAACTTGAAAAACTGGCACCGAGTCGGTGCTTTTTTGACCGAGTACATTCCAGTCAGTATCATTTCAGGTGATGTTTGGAGACGACGG
2428	ACCACGTCTCACACCGCATACAGTCAGTATCAATTCGTTTTAGAGCTAGAAATAGCAAGTTAAAATAAGGCTAGTCCGTTATCAACTTGAAAAACTGGCACCGAGTCGGTGCTTTTTTGACCGATTACCAAACAGGCTGTATGAATTCAGGTCCCGTTTGGAGACGACGG
2429	ACCACGTCTCACACCGCATACAGTCAGTATCAATTCGTTTTAGAGCTAGAAATAGCAAGTTAAAATAAGGCTAGTCCGTTATCAACTTGAAAAACTGGCACCGAGTCGGTGCTTTTTTGACCGCCAACCACACAGCCAGTATGAATCCAGGCAATGTTTGGAGACGACGG
2430	ACCACGTCTCACACCGCATACAGTCAGTATCAATTCGTTTTAGAGCTAGAAATAGCAAGTTAAAATAAGGCTAGTCCGTTATCAACTTGAAAAACTGGCACCGAGTCGGTGCTTTTTTGACCGCGCACCACACAGTCAGTGTCATTTAAGGTGGCGTTTGGAGACGACGG
2431	ACCACGTCTCACACCGCATACAGTCAGTATCAATTCGTTTTAGAGCTAGAAATAGCAAGTTAAAATAAGGCTAGTCCGTTATCAACTTGAAAAACTGGCACCGAGTCGGTGCTTTTTTGACCGCGTACCACACAGTCTGTATTACTTCAGGCTTGGTTTGGAGACGACGG
2432	ACCACGTCTCACACCGCATACAGTCAGTATCAATTCGTTTTAGAGCTAGAAATAGCAAGTTAAAATAAGGCTAGTCCGTTATCAACTTGAAAAACTGGCACCGAGTCGGTGCTTTTTTGACCGCTAACCACACATTCACTGTCAATTCTGGAGGGGTTTGGAGACGACGG
2433	ACCACGTCTCACACCGCATACAGTCAGTATCAATTCGTTTTAGAGCTAGAAATAGCAAGTTAAAATAAGGCTAGTCCGTTATCAACTTGAAAAACTGGCACCGAGTCGGTGCTTTTTTGACCGCTTACCAGAAAGTTAGTGTCAATTCTGGAGAAGTTTGGAGACGACGG
2434	ACCACGTCTCACACCGCATACAGTCAGTATCAATTCGTTTTAGAGCTAGAAATAGCAAGTTAAAATAAGGCTAGTCCGTTATCAACTTGAAAAACTGGCACCGAGTCGGTGCTTTTTTGACCGGCGACCATAAAATCACTTTCAATTCTGGGCCTGTTTGGAGACGACGG
2435	ACCACGTCTCACACCGCATACAGTCAGTATCAATTCGTTTTAGAGCTAGAAATAGCAAGTTAAAATAAGGCTAGTCCGTTATCAACTTGAAAAACTGGCACCGAGTCGGTGCTTTTTTGACCGGCTACCATAAAGTCAGTGGCAAGTCAGGACTGGTTTGGAGACGACGG
2437	ACCACGTCTCACACCGCATACAGTCAGTATCAATTCGTTTTAGAGCTAGAAATAGCAAGTTAAAATAAGGCTAGTCCGTTATCAACTTGAAAAACTGGCACCGAGTCGGTGCTTTTTTGACCGTCAACCATACAGCCAGTATCAAAGCTGGCTATGTTTGGAGACGACGG
2438	ACCACGTCTCACACCGCATACAGTCAGTATCAATTCGTTTTAGAGCTAGAAATAGCAAGTTAAAATAAGGCTAGTCCGTTATCAACTTGAAAAACTGGCACCGAGTCGGTGCTTTTTTGACCGTCTACCATACAGGCAATATTAATACAGGAGTTGTTTGGAGACGACGG
2439	ACCACGTCTCACACCGCATACAGTCAGTATCAATTCGTTTTAGAGCTAGAAATAGCAAGTTAAAATAAGGCTAGTCCGTTATCAACTTGAAAAACTGGCACCGAGTCGGTGCTTTTTTGACCGTGGACCATACAGTCAGAATTACCTCTGGAAATGTTTGGAGACGACGG
2440	ACCACGTCTCACACCGCATACAGTCAGTATCAATTCGTTTTAGAGCTAGAAATAGCAAGTTAAAATAAGGCTAGTCCGTTATCAACTTGAAAAACTGGCACCGAGTCGGTGCTTTTTTGACCGTTAACCATACAGTCAGTAACCATTTGGGATTGGTTTGGAGACGACGG
2441	ACCACGTCTCACACCGCATACAGTCAGTATCAATTCGTTTTAGAGCTAGAAATAGCAAGTTAAAATAAGGCTAGTCCGTTATCAACTTGAAAAACTGGCACCGAGTCGGTGCTTTTTTGACCGTTGACCATACATTCAGCATACATTCAGGTCTTGTTTGGAGACGACGG
2442	ACCACGTCTCACACCGCATACAGTCAGTATCAATTCGTTTTAGAGCTAGAAATAGCAAGTTAAAATAAGGCTAGTCCGTTATCAACTTGAAAAACTGGCACCGAGTCGGTGCTTTTTTGACCTAACACCATAGAGCCAGAATCAATTTAGGCCTAGTTTGGAGACGACGG
2444	ACCACGTCTCACACCGCATACAGTCAGTATCAATTCGTTTTAGAGCTAGAAATAGCAAGTTAAAATAAGGCTAGTCCGTTATCAACTTGAAAAACTGGCACCGAGTCGGTGCTTTTTTGACCTAGGACCATTCAGTAAGTATTAATTAAGGATGAGTTTGGAGACGACGG
2445	ACCACGTCTCACACCGCATACAGTCAGTATCAATTCGTTTTAGAGCTAGAAATAGCAAGTTAAAATAAGGCTAGTCCGTTATCAACTTGAAAAACTGGCACCGAGTCGGTGCTTTTTTGACCTATCACCCTACAGTCAGGATCAAGGCAGGGTGCGTTTGGAGACGACGG
2446	ACCACGTCTCACACCGCATACAGTCAGTATCAATTCGTTTTAGAGCTAGAAATAGCAAGTTAAAATAAGGCTAGTCCGTTATCAACTTGAAAAACTGGCACCGAGTCGGTGCTTTTTTGACCTATGACCCTACAGTCAGTATCATCTTGGGGAAGGTTTGGAGACGACGG
2447	ACCACGTCTCACACCGCATACAGTCAGTATCAATTCGTTTTAGAGCTAGAAATAGCAAGTTAAAATAAGGCTAGTCCGTTATCAACTTGAAAAACTGGCACCGAGTCGGTGCTTTTTTGACCTATTACCCTAGAGTCAGTACCAACTCCGGCCAGGTTTGGAGACGACGG
2448	ACCACGTCTCACACCGCATACAGTCAGTATCAATTCGTTTTAGAGCTAGAAATAGCAAGTTAAAATAAGGCTAGTCCGTTATCAACTTGAAAAACTGGCACCGAGTCGGTGCTTTTTTGACCTCCAACCTTACAGTTAGTATAAGTTCAGGCTGTGTTTGGAGACGACGG
2449	ACCACGTCTCACACCGCATACAGTCAGTATCAATTCGTTTTAGAGCTAGAAATAGCAAGTTAAAATAAGGCTAGTCCGTTATCAACTTGAAAAACTGGCACCGAGTCGGTGCTTTTTTGACCTCGCACCTTTCAGTCTGTTTCAATTCTGGCTTCGTTTGGAGACGACGG
2450	ACCACGTCTCACACCGCATACAGTCAGTATCAATTCGTTTTAGAGCTAGAAATAGCAAGTTAAAATAAGGCTAGTCCGTTATCAACTTGAAAAACTGGCACCGAGTCGGTGCTTTTTTGACCTCGGACCTTTCAGTGAATATCAATTCTGGAATTGTTTGGAGACGACGG
2451	ACCACGTCTCACACCGCATACAGTCAGTATCAATTCGTTTTAGAGCTAGAAATAGCAAGTTAAAATAAGGCTAGTCCGTTATCAACTTGAAAAACTGGCACCGAGTCGGTGCTTTTTTGACCTCTTACGATGCAGACTGTATCAATTCAGGGATCGTTTGGAGACGACGG
2452	ACCACGTCTCACACCGCATACAGTCAGTATCAATTCGTTTTAGAGCTAGAAATAGCAAGTTAAAATAAGGCTAGTCCGTTATCAACTTGAAAAACTGGCACCGAGTCGGTGCTTTTTTGACCTGGCACTATGAAGTCAGTCTCAATTCAGGCAAAGTTTGGAGACGACGG
2453	ACCACGTCTCACACCGCATACAGTCAGTATCAATTCGTTTTAGAGCTAGAAATAGCAAGTTAAAATAAGGCTAGTCCGTTATCAACTTGAAAAACTGGCACCGAGTCGGTGCTTTTTTGACCTGTAACAATACAGTTAGAATAAATTCTGGTGTTGTTTGGAGACGACGG
2454	ACCACGTCTCACACCGCATACAGTCAGTATCAATTCGTTTTAGAGCTAGAAATAGCAAGTTAAAATAAGGCTAGTCCGTTATCAACTTGAAAAACTGGCACCGAGTCGGTGCTTTTTTGACCTTACACAATCCAGTCAGTATCTAATCTGGCTTTGTTTGGAGACGACGG
2455	ACCACGTCTCACACCGCATACAGTCAGTATCAATTCGTTTTAGAGCTAGAAATAGCAAGTTAAAATAAGGCTAGTCCGTTATCAACTTGAAAAACTGGCACCGAGTCGGTGCTTTTTTGACCTTCAACCAAACAGGCAGCATCAATTACGGAGGAGTTTGGAGACGACGG
2456	ACCACGTCTCACACCGCATACAGTCAGTATCAATTCGTTTTAGAGCTAGAAATAGCAAGTTAAAATAAGGCTAGTCCGTTATCAACTTGAAAAACTGGCACCGAGTCGGTGCTTTTTTGACCTTCCACCAAACAGTCAGCAACAATGCCGGCTTTGTTTGGAGACGACGG
2457	ACCACGTCTCACACCGCATACAGTCAGTATCAATTCGTTTTAGAGCTAGAAATAGCAAGTTAAAATAAGGCTAGTCCGTTATCAACTTGAAAAACTGGCACCGAGTCGGTGCTTTTTTGACCTTCTACCAATCACTGAGTATCAATTCTGGATGTGTTTGGAGACGACGG
2458	ACCACGTCTCACACCGCATACAGTCAGTATCAATTCGTTTTAGAGCTAGAAATAGCAAGTTAAAATAAGGCTAGTCCGTTATCAACTTGAAAAACTGGCACCGAGTCGGTGCTTTTTTGACCTTGCACCAGACAGTCACTCCCAATTCTGGGGTCGTTTGGAGACGACGG
2459	ACCACGTCTCACACCGCATACAGTCAGTATCAATTCGTTTTAGAGCTAGAAATAGCAAGTTAAAATAAGGCTAGTCCGTTATCAACTTGAAAAACTGGCACCGAGTCGGTGCTTTTTTGACCTTGGACCAGACAGTCAGTATCAGTGAAGGTCAGGTTTGGAGACGACGG
2460	ACCACGTCTCACACCGCATACAGTCAGTATCAATTCGTTTTAGAGCTAGAAATAGCAAGTTAAAATAAGGCTAGTCCGTTATCAACTTGAAAAACTGGCACCGAGTCGGTGCTTTTTTGACCTTGTACCAGACAGTCAGTTTCATTTAAGGATTCGTTTGGAGACGACGG
2461	ACCACGTCTCACACCGCATACAGTCAGTATCAATTCGTTTTAGAGCTAGAAATAGCAAGTTAAAATAAGGCTAGTCCGTTATCAACTTGAAAAACTGGCACCGAGTCGGTGCTTTTTTGACGAAGAACCATACAATAAGCATCATTTCAGGCTTCGTTTGGAGACGACGG
2462	ACCACGTCTCACACCGCATACAGTCAGTATCAATTCGTTTTAGAGCTAGAAATAGCAAGTTAAAATAAGGCTAGTCCGTTATCAACTTGAAAAACTGGCACCGAGTCGGTGCTTTTTTGACGAAGGACCATACACTCAGCACCAGTTCAGGCCAAGTTTGGAGACGACGG
2463	ACCACGTCTCACACCGCATACAGTCAGTATCAATTCGTTTTAGAGCTAGAAATAGCAAGTTAAAATAAGGCTAGTCCGTTATCAACTTGAAAAACTGGCACCGAGTCGGTGCTTTTTTGACGAATAACCATACACTGAGTAACTATTCTGGTCTTGTTTGGAGACGACGG
2464	ACCACGTCTCACACCGCATACAGTCAGTATCAATTCGTTTTAGAGCTAGAAATAGCAAGTTAAAATAAGGCTAGTCCGTTATCAACTTGAAAAACTGGCACCGAGTCGGTGCTTTTTTGACGAATCACCATACAGGCAATATGAACTCTGGAATTGTTTGGAGACGACGG
2465	ACCACGTCTCACACCGCATACAGTCAGTATCAATTCGTTTTAGAGCTAGAAATAGCAAGTTAAAATAAGGCTAGTCCGTTATCAACTTGAAAAACTGGCACCGAGTCGGTGCTTTTTTGACGACAGACCATACAGGTAGTATGAATTCAGGCCCTGTTTGGAGACGACGG
2466	ACCACGTCTCACACCGCATACAGTCAGTATCAATTCGTTTTAGAGCTAGAAATAGCAAGTTAAAATAAGGCTAGTCCGTTATCAACTTGAAAAACTGGCACCGAGTCGGTGCTTTTTTGACGACATACCATACAGGTAGTATTAATTCAGGCCACGTTTGGAGACGACGG
2467	ACCACGTCTCACACCGCATACAGTCAGTATCAATTCGTTTTAGAGCTAGAAATAGCAAGTTAAAATAAGGCTAGTCCGTTATCAACTTGAAAAACTGGCACCGAGTCGGTGCTTTTTTGACGACGAACCATACAGTCACCACCAAGTCAGGTACCGTTTGGAGACGACGG
2468	ACCACGTCTCACACCGCATACAGTCAGTATCAATTCGTTTTAGAGCTAGAAATAGCAAGTTAAAATAAGGCTAGTCCGTTATCAACTTGAAAAACTGGCACCGAGTCGGTGCTTTTTTGACGACGCACCATACAGTCAGTCTGAAATTGGGATAGGTTTGGAGACGACGG
2469	ACCACGTCTCACACCGCATACAGTCAGTATCAATTCGTTTTAGAGCTAGAAATAGCAAGTTAAAATAAGGCTAGTCCGTTATCAACTTGAAAAACTGGCACCGAGTCGGTGCTTTTTTGACGACGTACCATACAGTGAGTATAAAAGCTGGAATGGTTTGGAGACGACGG
2470	ACCACGTCTCACACCGCATACAGTCAGTATCAATTCGTTTTAGAGCTAGAAATAGCAAGTTAAAATAAGGCTAGTCCGTTATCAACTTGAAAAACTGGCACCGAGTCGGTGCTTTTTTGACGACTTACCATACAGTGAGTATAAATAAAGGCCAAGTTTGGAGACGACGG
2471	ACCACGTCTCACACCGCATACAGTCAGTATCAATTCGTTTTAGAGCTAGAAATAGCAAGTTAAAATAAGGCTAGTCCGTTATCAACTTGAAAAACTGGCACCGAGTCGGTGCTTTTTTGACGAGGAACCATACTGTCAATGTCAAGTCTGGTTTTGTTTGGAGACGACGG
2472	ACCACGTCTCACACCGCATACAGTCAGTATCAATTCGTTTTAGAGCTAGAAATAGCAAGTTAAAATAAGGCTAGTCCGTTATCAACTTGAAAAACTGGCACCGAGTCGGTGCTTTTTTGACGATACACCATAGAGTCAGTATAACTTTGGGTCTAGTTTGGAGACGACGG
2473	ACCACGTCTCACACCGCATACAGTCAGTATCAATTCGTTTTAGAGCTAGAAATAGCAAGTTAAAATAAGGCTAGTCCGTTATCAACTTGAAAAACTGGCACCGAGTCGGTGCTTTTTTGACGATAGACCATAGAGTCAGTGTCACTGCAGGCATGGTTTGGAGACGACGG
2474	ACCACGTCTCACACCGCATACAGTCAGTATCAATTCGTTTTAGAGCTAGAAATAGCAAGTTAAAATAAGGCTAGTCCGTTATCAACTTGAAAAACTGGCACCGAGTCGGTGCTTTTTTGACGATCAACCATCCAGTCATTCTCAACTCAGGCCTCGTTTGGAGACGACGG
2475	ACCACGTCTCACACCGCATACAGTCAGTATCAATTCGTTTTAGAGCTAGAAATAGCAAGTTAAAATAAGGCTAGTCCGTTATCAACTTGAAAAACTGGCACCGAGTCGGTGCTTTTTTGACGATCTACCATGCAGTTAGTAGCAATGCTGGAACTGTTTGGAGACGACGG
2476	ACCACGTCTCACACCGCATACAGTCAGTATCAATTCGTTTTAGAGCTAGAAATAGCAAGTTAAAATAAGGCTAGTCCGTTATCAACTTGAAAAACTGGCACCGAGTCGGTGCTTTTTTGACGATGGACCATGGAGTCAGAATCAAGTCAGGTGTCGTTTGGAGACGACGG
2477	ACCACGTCTCACACCGCATACAGTCAGTATCAATTCGTTTTAGAGCTAGAAATAGCAAGTTAAAATAAGGCTAGTCCGTTATCAACTTGAAAAACTGGCACCGAGTCGGTGCTTTTTTGACGCAACACCATTCAGGAAGTATAAATTCTGGCCCTGTTTGGAGACGACGG
2478	ACCACGTCTCACACCGCATACAGTCAGTATCAATTCGTTTTAGAGCTAGAAATAGCAAGTTAAAATAAGGCTAGTCCGTTATCAACTTGAAAAACTGGCACCGAGTCGGTGCTTTTTTGACGCAATACCATTCAGTCCTTATCAACTCAGGACACGTTTGGAGACGACGG
2479	ACCACGTCTCACACCGCATACAGTCAGTATCAATTCGTTTTAGAGCTAGAAATAGCAAGTTAAAATAAGGCTAGTCCGTTATCAACTTGAAAAACTGGCACCGAGTCGGTGCTTTTTTGACGCACCACCATTCATTCAGTATTTATTCTGGCTCTGTTTGGAGACGACGG
2480	ACCACGTCTCACACCGCATACAGTCAGTATCAATTCGTTTTAGAGCTAGAAATAGCAAGTTAAAATAAGGCTAGTCCGTTATCAACTTGAAAAACTGGCACCGAGTCGGTGCTTTTTTGACGCATCACCTTAAAGTCAGTATGAGTTCAGGCCCAGTTTGGAGACGACGG
2481	ACCACGTCTCACACCGCATACAGTCAGTATCAATTCGTTTTAGAGCTAGAAATAGCAAGTTAAAATAAGGCTAGTCCGTTATCAACTTGAAAAACTGGCACCGAGTCGGTGCTTTTTTGACGCCGCACTATACAACGAGTATCAATTCTGGGCCTGTTTGGAGACGACGG
2482	ACCACGTCTCACACCGCATACAGTCAGTATCAATTCGTTTTAGAGCTAGAAATAGCAAGTTAAAATAAGGCTAGTCCGTTATCAACTTGAAAAACTGGCACCGAGTCGGTGCTTTTTTGACGCCGGACTATATAGACAGTATCAACTCTGGGTGGGTTTGGAGACGACGG
2484	ACCACGTCTCACACCGTGACATCAATTATTATACATGTTTTAGAGCTAGAAATAGCAAGTTAAAATAAGGCTAGTCCGTTATCAACTTGAAAAACTGGCACCGAGTCGGTGCTTTTTTGACTCGCAACTAAGATAAATTATTATAAATAGGATTGGTTTGGAGACGACGG
2485	ACCACGTCTCACACCGTGACATCAATTATTATACATGTTTTAGAGCTAGAAATAGCAAGTTAAAATAAGGCTAGTCCGTTATCAACTTGAAAAACTGGCACCGAGTCGGTGCTTTTTTGACGCCTCACACACATCCATCATTATACATTGGAAAAGTTTGGAGACGACGG
2486	ACCACGTCTCACACCGTGACATCAATTATTATACATGTTTTAGAGCTAGAAATAGCAAGTTAAAATAAGGCTAGTCCGTTATCAACTTGAAAAACTGGCACCGAGTCGGTGCTTTTTTGACGCGAGACAGACATCAATCATTGTACAATGGTTTTGTTTGGAGACGACGG
2487	ACCACGTCTCACACCGTGACATCAATTATTATACATGTTTTAGAGCTAGAAATAGCAAGTTAAAATAAGGCTAGTCCGTTATCAACTTGAAAAACTGGCACCGAGTCGGTGCTTTTTTGACGCGATACAGACATCAATTATAATTCAACGGTCTTGTTTGGAGACGACGG
2489	ACCACGTCTCACACCGTGACATCAATTATTATACATGTTTTAGAGCTAGAAATAGCAAGTTAAAATAAGGCTAGTCCGTTATCAACTTGAAAAACTGGCACCGAGTCGGTGCTTTTTTGACGCGTGACGTACATCAATTTATATACATTGGCCCTGTTTGGAGACGACGG
2490	ACCACGTCTCACACCGTGACATCAATTATTATACATGTTTTAGAGCTAGAAATAGCAAGTTAAAATAAGGCTAGTCCGTTATCAACTTGAAAAACTGGCACCGAGTCGGTGCTTTTTTGACGCTAGACTAACATAAATTATTATCCAGGGGAAGTGTTTGGAGACGACGG
2491	ACCACGTCTCACACCGTGACATCAATTATTATACATGTTTTAGAGCTAGAAATAGCAAGTTAAAATAAGGCTAGTCCGTTATCAACTTGAAAAACTGGCACCGAGTCGGTGCTTTTTTGACGCTCCACTAACATCAATAACTATTCATTGGAAATGTTTGGAGACGACGG
2492	ACCACGTCTCACACCGTGACATCAATTATTATACATGTTTTAGAGCTAGAAATAGCAAGTTAAAATAAGGCTAGTCCGTTATCAACTTGAAAAACTGGCACCGAGTCGGTGCTTTTTTGACGCTCTACTAACATCCACTATTATACAAAGGAAGTGTTTGGAGACGACGG
2493	ACCACGTCTCACACCGTGACATCAATTATTATACATGTTTTAGAGCTAGAAATAGCAAGTTAAAATAAGGCTAGTCCGTTATCAACTTGAAAAACTGGCACCGAGTCGGTGCTTTTTTGACGCTGTACTAACATCCATTATAATACACTGGTAAGGTTTGGAGACGACGG
2494	ACCACGTCTCACACCGTGACATCAATTATTATACATGTTTTAGAGCTAGAAATAGCAAGTTAAAATAAGGCTAGTCCGTTATCAACTTGAAAAACTGGCACCGAGTCGGTGCTTTTTTGACGCTTAACTAACTTCAAATATTATTCATTGGGATTGTTTGGAGACGACGG
2495	ACCACGTCTCACACCGTGACATCAATTATTATACATGTTTTAGAGCTAGAAATAGCAAGTTAAAATAAGGCTAGTCCGTTATCAACTTGAAAAACTGGCACCGAGTCGGTGCTTTTTTGACGCTTCACTAACTTCAATAATTAGACATTGGAGGGGTTTGGAGACGACGG
2496	ACCACGTCTCACACCGTGACATCAATTATTATACATGTTTTAGAGCTAGAAATAGCAAGTTAAAATAAGGCTAGTCCGTTATCAACTTGAAAAACTGGCACCGAGTCGGTGCTTTTTTGACGCTTGACTAACTTCAATTATTATACTAAGGACCTGTTTGGAGACGACGG
2497	ACCACGTCTCACACCGTGACATCAATTATTATACATGTTTTAGAGCTAGAAATAGCAAGTTAAAATAAGGCTAGTCCGTTATCAACTTGAAAAACTGGCACCGAGTCGGTGCTTTTTTGACGGAAGACTAAGATTGATTATTATACATGGGAAGAGTTTGGAGACGACGG
2498	ACCACGTCTCACACCGTGACATCAATTATTATACATGTTTTAGAGCTAGAAATAGCAAGTTAAAATAAGGCTAGTCCGTTATCAACTTGAAAAACTGGCACCGAGTCGGTGCTTTTTTGACGGAGAACTCACATTGATTATGATACATTGGTCTAGTTTGGAGACGACGG
2499	ACCACGTCTCACACCGTGACATCAATTATTATACATGTTTTAGAGCTAGAAATAGCAAGTTAAAATAAGGCTAGTCCGTTATCAACTTGAAAAACTGGCACCGAGTCGGTGCTTTTTTGACGGAGTACTGAAAATAACTATTATACATAGGAACAGTTTGGAGACGACGG
2500	ACCACGTCTCACACCGTGACATCAATTATTATACATGTTTTAGAGCTAGAAATAGCAAGTTAAAATAAGGCTAGTCCGTTATCAACTTGAAAAACTGGCACCGAGTCGGTGCTTTTTTGACGGATGACTGAAATCTATTATCATCCATTGGCCATGTTTGGAGACGACGG
2501	ACCACGTCTCACACCGTGACATCAATTATTATACATGTTTTAGAGCTAGAAATAGCAAGTTAAAATAAGGCTAGTCCGTTATCAACTTGAAAAACTGGCACCGAGTCGGTGCTTTTTTGACGGATTACTGAAGTCAAAAATTATACATGGGTTTTGTTTGGAGACGACGG
2502	ACCACGTCTCACACCGTGACATCAATTATTATACATGTTTTAGAGCTAGAAATAGCAAGTTAAAATAAGGCTAGTCCGTTATCAACTTGAAAAACTGGCACCGAGTCGGTGCTTTTTTGACGGCCAACTGACAACAATTATTAAAAAGAGGAAATGTTTGGAGACGACGG
2503	ACCACGTCTCACACCGTGACATCAATTATTATACATGTTTTAGAGCTAGAAATAGCAAGTTAAAATAAGGCTAGTCCGTTATCAACTTGAAAAACTGGCACCGAGTCGGTGCTTTTTTGACGGCGCACTGACACTAATTATTATGCTTGGGCTTTGTTTGGAGACGACGG
2504	ACCACGTCTCACACCGTGACATCAATTATTATACATGTTTTAGAGCTAGAAATAGCAAGTTAAAATAAGGCTAGTCCGTTATCAACTTGAAAAACTGGCACCGAGTCGGTGCTTTTTTGACGGCTAACTGACAGCAATTTGTAGACATGGGTCTTGTTTGGAGACGACGG
2505	ACCACGTCTCACACCGTGACATCAATTATTATACATGTTTTAGAGCTAGAAATAGCAAGTTAAAATAAGGCTAGTCCGTTATCAACTTGAAAAACTGGCACCGAGTCGGTGCTTTTTTGACGGTCAACTGACATAAATTATAGTACAGTGGGATAGTTTGGAGACGACGG
2506	ACCACGTCTCACACCGTGACATCAATTATTATACATGTTTTAGAGCTAGAAATAGCAAGTTAAAATAAGGCTAGTCCGTTATCAACTTGAAAAACTGGCACCGAGTCGGTGCTTTTTTGACGGTCGACTGACATAAATTATGAAACATTGGCTTGGTTTGGAGACGACGG
2507	ACCACGTCTCACACCGTGACATCAATTATTATACATGTTTTAGAGCTAGAAATAGCAAGTTAAAATAAGGCTAGTCCGTTATCAACTTGAAAAACTGGCACCGAGTCGGTGCTTTTTTGACGGTGAACTGACATAAATTATTCTACATGGGCCATGTTTGGAGACGACGG
2508	ACCACGTCTCACACCGTGACATCAATTATTATACATGTTTTAGAGCTAGAAATAGCAAGTTAAAATAAGGCTAGTCCGTTATCAACTTGAAAAACTGGCACCGAGTCGGTGCTTTTTTGACGGTTAACTGACATAAATTCTTCTCCATGGGATGGGTTTGGAGACGACGG
2509	ACCACGTCTCACACCGTGACATCAATTATTATACATGTTTTAGAGCTAGAAATAGCAAGTTAAAATAAGGCTAGTCCGTTATCAACTTGAAAAACTGGCACCGAGTCGGTGCTTTTTTGACGGTTCACTGACATCAAAAATTAAACACAGGCATTGTTTGGAGACGACGG
2510	ACCACGTCTCACACCGTGACATCAATTATTATACATGTTTTAGAGCTAGAAATAGCAAGTTAAAATAAGGCTAGTCCGTTATCAACTTGAAAAACTGGCACCGAGTCGGTGCTTTTTTGACGTAATACTGACATCAAATATTACACAATGGGAGCGTTTGGAGACGACGG
2511	ACCACGTCTCACACCGTGACATCAATTATTATACATGTTTTAGAGCTAGAAATAGCAAGTTAAAATAAGGCTAGTCCGTTATCAACTTGAAAAACTGGCACCGAGTCGGTGCTTTTTTGACGTACAACTGACATCAACTCATTTACATAGGAGGGGTTTGGAGACGACGG
2512	ACCACGTCTCACACCGTGACATCAATTATTATACATGTTTTAGAGCTAGAAATAGCAAGTTAAAATAAGGCTAGTCCGTTATCAACTTGAAAAACTGGCACCGAGTCGGTGCTTTTTTGACGTACTACTGACATCACTTATTATGCATGGGCTATGTTTGGAGACGACGG
2513	ACCACGTCTCACACCGTGACATCAATTATTATACATGTTTTAGAGCTAGAAATAGCAAGTTAAAATAAGGCTAGTCCGTTATCAACTTGAAAAACTGGCACCGAGTCGGTGCTTTTTTGACGTCATACTGACATGTATGATTATACTTAGGAAACGTTTGGAGACGACGG
2514	ACCACGTCTCACACCGTGACATCAATTATTATACATGTTTTAGAGCTAGAAATAGCAAGTTAAAATAAGGCTAGTCCGTTATCAACTTGAAAAACTGGCACCGAGTCGGTGCTTTTTTGACGTCGTACTGACGTCAACTACTATACTTTGGAGGAGTTTGGAGACGACGG
2515	ACCACGTCTCACACCGTGACATCAATTATTATACATGTTTTAGAGCTAGAAATAGCAAGTTAAAATAAGGCTAGTCCGTTATCAACTTGAAAAACTGGCACCGAGTCGGTGCTTTTTTGACGTGACACTGACTTCACTTATGATACATGGGTAGAGTTTGGAGACGACGG
2516	ACCACGTCTCACACCGTGACATCAATTATTATACATGTTTTAGAGCTAGAAATAGCAAGTTAAAATAAGGCTAGTCCGTTATCAACTTGAAAAACTGGCACCGAGTCGGTGCTTTTTTGACGTGTGACTGAGAGCAATTGTTAAACATTGGCCAGGTTTGGAGACGACGG
2517	ACCACGTCTCACACCGTGACATCAATTATTATACATGTTTTAGAGCTAGAAATAGCAAGTTAAAATAAGGCTAGTCCGTTATCAACTTGAAAAACTGGCACCGAGTCGGTGCTTTTTTGACGTTAGACTGAGATAAATTATACTACATTGGCCGGGTTTGGAGACGACGG
2518	ACCACGTCTCACACCGTGACATCAATTATTATACATGTTTTAGAGCTAGAAATAGCAAGTTAAAATAAGGCTAGTCCGTTATCAACTTGAAAAACTGGCACCGAGTCGGTGCTTTTTTGACGTTGGACTGATATCAATTCTTATTCTTTGGTCTAGTTTGGAGACGACGG
2519	ACCACGTCTCACACCGTGACATCAATTATTATACATGTTTTAGAGCTAGAAATAGCAAGTTAAAATAAGGCTAGTCCGTTATCAACTTGAAAAACTGGCACCGAGTCGGTGCTTTTTTGACTAACCACTGATATCCTTTATAATACATGGGTAAAGTTTGGAGACGACGG
2520	ACCACGTCTCACACCGTGACATCAATTATTATACATGTTTTAGAGCTAGAAATAGCAAGTTAAAATAAGGCTAGTCCGTTATCAACTTGAAAAACTGGCACCGAGTCGGTGCTTTTTTGACTAAGAACTGATATGAATTATTAGATATAGGATACGTTTGGAGACGACGG
2521	ACCACGTCTCACACCGTGACATCAATTATTATACATGTTTTAGAGCTAGAAATAGCAAGTTAAAATAAGGCTAGTCCGTTATCAACTTGAAAAACTGGCACCGAGTCGGTGCTTTTTTGACTAAGCACTGCCATCAATTATTAAATAGTGGCACAGTTTGGAGACGACGG
2522	ACCACGTCTCACACCGTGACATCAATTATTATACATGTTTTAGAGCTAGAAATAGCAAGTTAAAATAAGGCTAGTCCGTTATCAACTTGAAAAACTGGCACCGAGTCGGTGCTTTTTTGACTAAGGACTGCCATCATTTATCATACCTAGGTCAGGTTTGGAGACGACGG
2523	ACCACGTCTCACACCGTGACATCAATTATTATACATGTTTTAGAGCTAGAAATAGCAAGTTAAAATAAGGCTAGTCCGTTATCAACTTGAAAAACTGGCACCGAGTCGGTGCTTTTTTGACTAATAACTGCCATCATTTATTAAACTTTGGCAAAGTTTGGAGACGACGG
2524	ACCACGTCTCACACCGTGACATCAATTATTATACATGTTTTAGAGCTAGAAATAGCAAGTTAAAATAAGGCTAGTCCGTTATCAACTTGAAAAACTGGCACCGAGTCGGTGCTTTTTTGACTAATGACTGGCAACAATTATTAAATATTGGCTAGGTTTGGAGACGACGG
2525	ACCACGTCTCACACCGTGACATCAATTATTATACATGTTTTAGAGCTAGAAATAGCAAGTTAAAATAAGGCTAGTCCGTTATCAACTTGAAAAACTGGCACCGAGTCGGTGCTTTTTTGACTAATTACTGGCCTTAAGTATTATACATAGGCTTCGTTTGGAGACGACGG
2526	ACCACGTCTCACACCGTGACATCAATTATTATACATGTTTTAGAGCTAGAAATAGCAAGTTAAAATAAGGCTAGTCCGTTATCAACTTGAAAAACTGGCACCGAGTCGGTGCTTTTTTGACTACACACTGTCATAAACTATTCTACATTGGCCCGGTTTGGAGACGACGG
2527	ACCACGTCTCACACCGTGACATCAATTATTATACATGTTTTAGAGCTAGAAATAGCAAGTTAAAATAAGGCTAGTCCGTTATCAACTTGAAAAACTGGCACCGAGTCGGTGCTTTTTTGACTACGTACTTACATAAATTATTATAAGTGGGAAGAGTTTGGAGACGACGG
2529	ACCACGTCTCACACCGTGACATCAATTATTATACATGTTTTAGAGCTAGAAATAGCAAGTTAAAATAAGGCTAGTCCGTTATCAACTTGAAAAACTGGCACCGAGTCGGTGCTTTTTTGACTACTGACTTACATCAATTATTGTTTATGGGAATAGTTTGGAGACGACGG
2530	ACCACGTCTCACACCGTGACATCAATTATTATACATGTTTTAGAGCTAGAAATAGCAAGTTAAAATAAGGCTAGTCCGTTATCAACTTGAAAAACTGGCACCGAGTCGGTGCTTTTTTGACTAGATACTTACATCAGTTATTTGACATTGGGCAAGTTTGGAGACGACGG
2531	ACCACGTCTCACACCGTGACATCAATTATTATACATGTTTTAGAGCTAGAAATAGCAAGTTAAAATAAGGCTAGTCCGTTATCAACTTGAAAAACTGGCACCGAGTCGGTGCTTTTTTGACTAGGAACTTGCATGAATTAATATACATGGGAGCTGTTTGGAGACGACGG
2532	ACCACGTCTCACACCGTGACATCAATTATTATACATGTTTTAGAGCTAGAAATAGCAAGTTAAAATAAGGCTAGTCCGTTATCAACTTGAAAAACTGGCACCGAGTCGGTGCTTTTTTGACTAGGTACAACCATCAATTATGATACATTGGCTAAGTTTGGAGACGACGG
2533	ACCACGTCTCACACCGTGACATCAATTATTATACATGTTTTAGAGCTAGAAATAGCAAGTTAAAATAAGGCTAGTCCGTTATCAACTTGAAAAACTGGCACCGAGTCGGTGCTTTTTTGACTAGTGACACACATGCATTATTATACATAGGACTTGTTTGGAGACGACGG
2534	ACCACGTCTCACACCGTGACATCAATTATTATACATGTTTTAGAGCTAGAAATAGCAAGTTAAAATAAGGCTAGTCCGTTATCAACTTGAAAAACTGGCACCGAGTCGGTGCTTTTTTGACTATCTACAGACATCAATCAATATATATAGGATGTGTTTGGAGACGACGG
2535	ACCACGTCTCACACCGTGACATCAATTATTATACATGTTTTAGAGCTAGAAATAGCAAGTTAAAATAAGGCTAGTCCGTTATCAACTTGAAAAACTGGCACCGAGTCGGTGCTTTTTTGACTATGGACAGACATCAATGATAATACAGTGGAAAGGTTTGGAGACGACGG
2536	ACCACGTCTCACACCGTGACATCAATTATTATACATGTTTTAGAGCTAGAAATAGCAAGTTAAAATAAGGCTAGTCCGTTATCAACTTGAAAAACTGGCACCGAGTCGGTGCTTTTTTGACTCATCACGGACAAAAATTATTATTCATAGGGGCCGTTTGGAGACGACGG
2537	ACCACGTCTCACACCGTGACATCAATTATTATACATGTTTTAGAGCTAGAAATAGCAAGTTAAAATAAGGCTAGTCCGTTATCAACTTGAAAAACTGGCACCGAGTCGGTGCTTTTTTGACTCATGACGGACAGCATTTATAATACATAGGAACTGTTTGGAGACGACGG
2538	ACCACGTCTCACACCGTGACATCAATTATTATACATGTTTTAGAGCTAGAAATAGCAAGTTAAAATAAGGCTAGTCCGTTATCAACTTGAAAAACTGGCACCGAGTCGGTGCTTTTTTGACTCCAGACGGACATCAATTATTGGACTTAGGGTCCGTTTGGAGACGACGG
2539	ACCACGTCTCACACCGTGACATCAATTATTATACATGTTTTAGAGCTAGAAATAGCAAGTTAAAATAAGGCTAGTCCGTTATCAACTTGAAAAACTGGCACCGAGTCGGTGCTTTTTTGACTCCTAACTAACCTCAATTAATATACAGTGGGATAGTTTGGAGACGACGG
2540	ACCACGTCTCACACCGTGACATCAATTATTATACATGTTTTAGAGCTAGAAATAGCAAGTTAAAATAAGGCTAGTCCGTTATCAACTTGAAAAACTGGCACCGAGTCGGTGCTTTTTTGACTCCTGACTAAGAACAATTATTATAGATAGGTGTGGTTTGGAGACGACGG
2541	ACCACGTCTCACACCGTGACATCAATTATTATACATGTTTTAGAGCTAGAAATAGCAAGTTAAAATAAGGCTAGTCCGTTATCAACTTGAAAAACTGGCACCGAGTCGGTGCTTTTTTGACTCGTAACTCAAATCAATGATAATACATTGGAATAGTTTGGAGACGACGG
2542	ACCACGTCTCACACCGTGACATCAATTATTATACATGTTTTAGAGCTAGAAATAGCAAGTTAAAATAAGGCTAGTCCGTTATCAACTTGAAAAACTGGCACCGAGTCGGTGCTTTTTTGACTCGTCACTCACAGCAATAAATATACATGGGGTTAGTTTGGAGACGACGG
2543	ACCACGTCTCACACCGTGACATCAATTATTATACATGTTTTAGAGCTAGAAATAGCAAGTTAAAATAAGGCTAGTCCGTTATCAACTTGAAAAACTGGCACCGAGTCGGTGCTTTTTTGACTCTACACTGAAAACAATTGTTATACAACGGCCTTGTTTGGAGACGACGG
2544	ACCACGTCTCACACCGTGACATCAATTATTATACATGTTTTAGAGCTAGAAATAGCAAGTTAAAATAAGGCTAGTCCGTTATCAACTTGAAAAACTGGCACCGAGTCGGTGCTTTTTTGACTCTGCACTGAAATAAATTATTATGAATTGGAATGGTTTGGAGACGACGG
2545	ACCACGTCTCACACCGTGACATCAATTATTATACATGTTTTAGAGCTAGAAATAGCAAGTTAAAATAAGGCTAGTCCGTTATCAACTTGAAAAACTGGCACCGAGTCGGTGCTTTTTTGACTCTTAACTGAAATCAATTCATATCCATTGGCCCCGTTTGGAGACGACGG
2546	ACCACGTCTCACACCGTGACATCAATTATTATACATGTTTTAGAGCTAGAAATAGCAAGTTAAAATAAGGCTAGTCCGTTATCAACTTGAAAAACTGGCACCGAGTCGGTGCTTTTTTGACTCTTGACTGAAATGAATTATTAAACATTGGCAGGGTTTGGAGACGACGG
2547	ACCACGTCTCACACCGTGACATCAATTATTATACATGTTTTAGAGCTAGAAATAGCAAGTTAAAATAAGGCTAGTCCGTTATCAACTTGAAAAACTGGCACCGAGTCGGTGCTTTTTTGACTGCAGACTGACATAAAGGATTATAGATGGGTGATGTTTGGAGACGACGG
2548	ACCACGTCTCACACCGTGACATCAATTATTATACATGTTTTAGAGCTAGAAATAGCAAGTTAAAATAAGGCTAGTCCGTTATCAACTTGAAAAACTGGCACCGAGTCGGTGCTTTTTTGACTGCCAACTGACATAAATGATCATCCATGGGGGACGTTTGGAGACGACGG
2549	ACCACGTCTCACACCGTGACATCAATTATTATACATGTTTTAGAGCTAGAAATAGCAAGTTAAAATAAGGCTAGTCCGTTATCAACTTGAAAAACTGGCACCGAGTCGGTGCTTTTTTGACTGCGAACTGACATAAATTATTACCCAGTGGGGAGGTTTGGAGACGACGG
2550	ACCACGTCTCACACCGTGACATCAATTATTATACATGTTTTAGAGCTAGAAATAGCAAGTTAAAATAAGGCTAGTCCGTTATCAACTTGAAAAACTGGCACCGAGTCGGTGCTTTTTTGACTGCGCACTGACATAACTTATTAAAAATTGGCTGTGTTTGGAGACGACGG
2551	ACCACGTCTCACACCGTGACATCAATTATTATACATGTTTTAGAGCTAGAAATAGCAAGTTAAAATAAGGCTAGTCCGTTATCAACTTGAAAAACTGGCACCGAGTCGGTGCTTTTTTGACTGCTTACTGACATCAAGCAGTAGACATGGGTCTGGTTTGGAGACGACGG
2552	ACCACGTCTCACACCGTGACATCAATTATTATACATGTTTTAGAGCTAGAAATAGCAAGTTAAAATAAGGCTAGTCCGTTATCAACTTGAAAAACTGGCACCGAGTCGGTGCTTTTTTGACTGTCAACTGACATCATTTGTTATAGAATGGTAGAGTTTGGAGACGACGG
2553	ACCACGTCTCACACCGTGACATCAATTATTATACATGTTTTAGAGCTAGAAATAGCAAGTTAAAATAAGGCTAGTCCGTTATCAACTTGAAAAACTGGCACCGAGTCGGTGCTTTTTTGACTGTTAACTGACATCTATCATTATGAATTGGATATGTTTGGAGACGACGG
2554	ACCACGTCTCACACCGTGACATCAATTATTATACATGTTTTAGAGCTAGAAATAGCAAGTTAAAATAAGGCTAGTCCGTTATCAACTTGAAAAACTGGCACCGAGTCGGTGCTTTTTTGACTTACCACTGACATTAATGATTATATAAAGGATATGTTTGGAGACGACGG
2555	ACCACGTCTCACACCGTGACATCAATTATTATACATGTTTTAGAGCTAGAAATAGCAAGTTAAAATAAGGCTAGTCCGTTATCAACTTGAAAAACTGGCACCGAGTCGGTGCTTTTTTGACTTAGTACTGACATTATTTATTATCCCTGGGAAAAGTTTGGAGACGACGG
2556	ACCACGTCTCACACCGTGACATCAATTATTATACATGTTTTAGAGCTAGAAATAGCAAGTTAAAATAAGGCTAGTCCGTTATCAACTTGAAAAACTGGCACCGAGTCGGTGCTTTTTTGACTTATGACTGACATTTAGTCTTATACATTGGCTAAGTTTGGAGACGACGG
2557	ACCACGTCTCACACCGTGACATCAATTATTATACATGTTTTAGAGCTAGAAATAGCAAGTTAAAATAAGGCTAGTCCGTTATCAACTTGAAAAACTGGCACCGAGTCGGTGCTTTTTTGACTTATTACTGACATTTATTGTTACACATAGGAAGTGTTTGGAGACGACGG
2558	ACCACGTCTCACACCGTGACATCAATTATTATACATGTTTTAGAGCTAGAAATAGCAAGTTAAAATAAGGCTAGTCCGTTATCAACTTGAAAAACTGGCACCGAGTCGGTGCTTTTTTGACTTCATACTGACCTGTATTATTGTACATTGGAACTGTTTGGAGACGACGG
2559	ACCACGTCTCACACCGTGACATCAATTATTATACATGTTTTAGAGCTAGAAATAGCAAGTTAAAATAAGGCTAGTCCGTTATCAACTTGAAAAACTGGCACCGAGTCGGTGCTTTTTTGACTTCTGACTGAGGTCACTTATCATACATTGGCTCTGTTTGGAGACGACGG
2560	ACCACGTCTCACACCGTGACATCAATTATTATACATGTTTTAGAGCTAGAAATAGCAAGTTAAAATAAGGCTAGTCCGTTATCAACTTGAAAAACTGGCACCGAGTCGGTGCTTTTTTGACTTCTTACTGATAAAAGTTATTATACATTGGACATGTTTGGAGACGACGG
2561	ACCACGTCTCACACCGTGACATCAATTATTATACATGTTTTAGAGCTAGAAATAGCAAGTTAAAATAAGGCTAGTCCGTTATCAACTTGAAAAACTGGCACCGAGTCGGTGCTTTTTTGACTTGACACTGATAGCAAATATTACACATTGGGACTGTTTGGAGACGACGG
2562	ACCACGTCTCACACCGTGACATCAATTATTATACATGTTTTAGAGCTAGAAATAGCAAGTTAAAATAAGGCTAGTCCGTTATCAACTTGAAAAACTGGCACCGAGTCGGTGCTTTTTTGACTTGGCACTGATTTCAATTATTATACTGTGGTTATGTTTGGAGACGACGG
2563	ACCACGTCTCACACCGTGACATCAATTATTATACATGTTTTAGAGCTAGAAATAGCAAGTTAAAATAAGGCTAGTCCGTTATCAACTTGAAAAACTGGCACCGAGTCGGTGCTTTTTTGAGAACAGACTGGAATCCATTATTATGCATTGGCTAGGTTTGGAGACGACGG
2564	ACCACGTCTCACACCGTGACATCAATTATTATACATGTTTTAGAGCTAGAAATAGCAAGTTAAAATAAGGCTAGTCCGTTATCAACTTGAAAAACTGGCACCGAGTCGGTGCTTTTTTGAGAACGTACTGTCAAAAATTATTATACCTGGGAGGCGTTTGGAGACGACGG
2565	ACCACGTCTCACACCGTGACATCAATTATTATACATGTTTTAGAGCTAGAAATAGCAAGTTAAAATAAGGCTAGTCCGTTATCAACTTGAAAAACTGGCACCGAGTCGGTGCTTTTTTGAGAAGCAACTGTCATTAATAATTATTCATAGGCTTCGTTTGGAGACGACGG
2566	ACCACGTCTCACACCGTGACATCAATTATTATACATGTTTTAGAGCTAGAAATAGCAAGTTAAAATAAGGCTAGTCCGTTATCAACTTGAAAAACTGGCACCGAGTCGGTGCTTTTTTGAGAAGCGACTTACATAAATTATTACATATAGGTACAGTTTGGAGACGACGG
2567	ACCACGTCTCACACCGTGACATCAATTATTATACATGTTTTAGAGCTAGAAATAGCAAGTTAAAATAAGGCTAGTCCGTTATCAACTTGAAAAACTGGCACCGAGTCGGTGCTTTTTTGAGAATATACTTTCAGCAATTATTATGCATTGGTTAAGTTTGGAGACGACGG
2568	ACCACGTCTCACACCGGAAGAAACTGAGAAGCATGAGTTTTAGAGCTAGAAATAGCAAGTTAAAATAAGGCTAGTCCGTTATCAACTTGAAAAACTGGCACCGAGTCGGTGCTTTTTTACGCTTGCACCAAGAAACTTACAATCATGATGGAAGAGTTTGGAGACGACGG
2574	ACCACGTCTCACACCGGAAGAAACTGAGAAGCATGAGTTTTAGAGCTAGAAATAGCAAGTTAAAATAAGGCTAGTCCGTTATCAACTTGAAAAACTGGCACCGAGTCGGTGCTTTTTTACGGACGGACCAGGAAACTTACAAGCATGATGGAAGGGTTTGGAGACGACGG
2576	ACCACGTCTCACACCGGAAGAAACTGAGAAGCATGAGTTTTAGAGCTAGAAATAGCAAGTTAAAATAAGGCTAGTCCGTTATCAACTTGAAAAACTGGCACCGAGTCGGTGCTTTTTTACGGACTTACCAGGAAACTTAGAATCATGACGGAAGAGTTTGGAGACGACGG
2578	ACCACGTCTCACACCGGAAGAAACTGAGAAGCATGAGTTTTAGAGCTAGAAATAGCAAGTTAAAATAAGGCTAGTCCGTTATCAACTTGAAAAACTGGCACCGAGTCGGTGCTTTTTTACGGAGATACCAGGAAACTTAGAATCATGATGGAAGGGTTTGGAGACGACGG
2584	ACCACGTCTCACACCGGAAGAAACTGAGAAGCATGAGTTTTAGAGCTAGAAATAGCAAGTTAAAATAAGGCTAGTCCGTTATCAACTTGAAAAACTGGCACCGAGTCGGTGCTTTTTTACGGCCTGACGAAGAAAATAAGAATTATGAGGGATTTGTTTGGAGACGACGG
2585	ACCACGTCTCACACCGGAAGAAACTGAGAAGCATGAGTTTTAGAGCTAGAAATAGCAAGTTAAAATAAGGCTAGTCCGTTATCAACTTGAAAAACTGGCACCGAGTCGGTGCTTTTTTACGGTAATACGAAGAAACCCAGACACATGATGGGTCAGTTTGGAGACGACGG
2587	ACCACGTCTCACACCGGAAGAAACTGAGAAGCATGAGTTTTAGAGCTAGAAATAGCAAGTTAAAATAAGGCTAGTCCGTTATCAACTTGAAAAACTGGCACCGAGTCGGTGCTTTTTTACGGTTACACGAAGAAACTGAGACACAGAAAGGTCACGTTTGGAGACGACGG
2589	ACCACGTCTCACACCGGAAGAAACTGAGAAGCATGAGTTTTAGAGCTAGAAATAGCAAGTTAAAATAAGGCTAGTCCGTTATCAACTTGAAAAACTGGCACCGAGTCGGTGCTTTTTTACGGTTCGACGAAGAAACTGAGACCCAGGGAGGGGTAGTTTGGAGACGACGG
2591	ACCACGTCTCACACCGGAAGAAACTGAGAAGCATGAGTTTTAGAGCTAGAAATAGCAAGTTAAAATAAGGCTAGTCCGTTATCAACTTGAAAAACTGGCACCGAGTCGGTGCTTTTTTACGGTTGGACGAAGAAACTGAGACTCAGAAAGGTAGTGTTTGGAGACGACGG
2593	ACCACGTCTCACACCGGAAGAAACTGAGAAGCATGAGTTTTAGAGCTAGAAATAGCAAGTTAAAATAAGGCTAGTCCGTTATCAACTTGAAAAACTGGCACCGAGTCGGTGCTTTTTTACGTAAGAACGAAGAAACTGAGATCCAAAAGGGACCTGTTTGGAGACGACGG
2595	ACCACGTCTCACACCGGAAGAAACTGAGAAGCATGAGTTTTAGAGCTAGAAATAGCAAGTTAAAATAAGGCTAGTCCGTTATCAACTTGAAAAACTGGCACCGAGTCGGTGCTTTTTTACGTAAGTACGAAGAAACTGAGCCTCAGGAAGGTCCCGTTTGGAGACGACGG
2596	ACCACGTCTCACACCGGAAGAAACTGAGAAGCATGAGTTTTAGAGCTAGAAATAGCAAGTTAAAATAAGGCTAGTCCGTTATCAACTTGAAAAACTGGCACCGAGTCGGTGCTTTTTTACGTAATAACGAAGAAACTGAGGACCAGAACGGAGGTGTTTGGAGACGACGG
2598	ACCACGTCTCACACCGGAAGAAACTGAGAAGCATGAGTTTTAGAGCTAGAAATAGCAAGTTAAAATAAGGCTAGTCCGTTATCAACTTGAAAAACTGGCACCGAGTCGGTGCTTTTTTACGTAATTACGAAGAAACTGAGGCACATAAAGGTTAAGTTTGGAGACGACGG
2600	ACCACGTCTCACACCGGAAGAAACTGAGAAGCATGAGTTTTAGAGCTAGAAATAGCAAGTTAAAATAAGGCTAGTCCGTTATCAACTTGAAAAACTGGCACCGAGTCGGTGCTTTTTTACGTACTAACGAAGAAACTGAGGCCCAGGAAGGTGAAGTTTGGAGACGACGG
2601	ACCACGTCTCACACCGGAAGAAACTGAGAAGCATGAGTTTTAGAGCTAGAAATAGCAAGTTAAAATAAGGCTAGTCCGTTATCAACTTGAAAAACTGGCACCGAGTCGGTGCTTTTTTACGTACTCACGAAGAAACTGAGGCCCATGGAGGGGCAGTTTGGAGACGACGG
2602	ACCACGTCTCACACCGGAAGAAACTGAGAAGCATGAGTTTTAGAGCTAGAAATAGCAAGTTAAAATAAGGCTAGTCCGTTATCAACTTGAAAAACTGGCACCGAGTCGGTGCTTTTTTACGTAGACACGAAGAAACTGAGGCTCAGGAAGGAGTGGTTTGGAGACGACGG
2603	ACCACGTCTCACACCGGAAGAAACTGAGAAGCATGAGTTTTAGAGCTAGAAATAGCAAGTTAAAATAAGGCTAGTCCGTTATCAACTTGAAAAACTGGCACCGAGTCGGTGCTTTTTTACGTAGCTACGAAGAAACTGAGGTACAGGAAGGAATTGTTTGGAGACGACGG
2604	ACCACGTCTCACACCGGAAGAAACTGAGAAGCATGAGTTTTAGAGCTAGAAATAGCAAGTTAAAATAAGGCTAGTCCGTTATCAACTTGAAAAACTGGCACCGAGTCGGTGCTTTTTTACGTATCTACGAAGAAACTTACAATCATGGTGGAAGGGTTTGGAGACGACGG
2606	ACCACGTCTCACACCGGAAGAAACTGAGAAGCATGAGTTTTAGAGCTAGAAATAGCAAGTTAAAATAAGGCTAGTCCGTTATCAACTTGAAAAACTGGCACCGAGTCGGTGCTTTTTTACGTATTCACGAAGAAACTTATAATCATGGTGGAAAGGTTTGGAGACGACGG
2609	ACCACGTCTCACACCGGAAGAAACTGAGAAGCATGAGTTTTAGAGCTAGAAATAGCAAGTTAAAATAAGGCTAGTCCGTTATCAACTTGAAAAACTGGCACCGAGTCGGTGCTTTTTTACGTCTTGACGAAGACACTCAGGAGCAAGATGGGCAAGTTTGGAGACGACGG
2611	ACCACGTCTCACACCGGAAGAAACTGAGAAGCATGAGTTTTAGAGCTAGAAATAGCAAGTTAAAATAAGGCTAGTCCGTTATCAACTTGAAAAACTGGCACCGAGTCGGTGCTTTTTTACGTGAAGACGAAGACACTGAAAAGCAAAAAGGATACGTTTGGAGACGACGG
2612	ACCACGTCTCACACCGGAAGAAACTGAGAAGCATGAGTTTTAGAGCTAGAAATAGCAAGTTAAAATAAGGCTAGTCCGTTATCAACTTGAAAAACTGGCACCGAGTCGGTGCTTTTTTACGTGAGCACGAAGACACTGAAAAGCAAAAGGGATAAGTTTGGAGACGACGG
2637	ACCACGTCTCACACCGGAAGAAACTGAGAAGCATGAGTTTTAGAGCTAGAAATAGCAAGTTAAAATAAGGCTAGTCCGTTATCAACTTGAAAAACTGGCACCGAGTCGGTGCTTTTTTACTACACTACGAGGAAACTGAGACCCAAGAAGGGGAGGTTTGGAGACGACGG
2639	ACCACGTCTCACACCGGAAGAAACTGAGAAGCATGAGTTTTAGAGCTAGAAATAGCAAGTTAAAATAAGGCTAGTCCGTTATCAACTTGAAAAACTGGCACCGAGTCGGTGCTTTTTTACTACATCACGAGGAAACTGAGACTCATAAAGGGCCAGTTTGGAGACGACGG
2642	ACCACGTCTCACACCGGAAGAAACTGAGAAGCATGAGTTTTAGAGCTAGAAATAGCAAGTTAAAATAAGGCTAGTCCGTTATCAACTTGAAAAACTGGCACCGAGTCGGTGCTTTTTTACTACGACACGAGGAAATTGAGAATCAGGAAGGCTAAGTTTGGAGACGACGG
2644	ACCACGTCTCACACCGGAAGAAACTGAGAAGCATGAGTTTTAGAGCTAGAAATAGCAAGTTAAAATAAGGCTAGTCCGTTATCAACTTGAAAAACTGGCACCGAGTCGGTGCTTTTTTACTACTGCACGATGAGACTGAGAAGCAAAACGGAGCTGTTTGGAGACGACGG
2647	ACCACGTCTCACACCGGAAGAAACTGAGAAGCATGAGTTTTAGAGCTAGAAATAGCAAGTTAAAATAAGGCTAGTCCGTTATCAACTTGAAAAACTGGCACCGAGTCGGTGCTTTTTTACTATACAACGTGGAAACTGAGACACATGAAGGTTCAGTTTGGAGACGACGG
2648	ACCACGTCTCACACCGGAAGAAACTGAGAAGCATGAGTTTTAGAGCTAGAAATAGCAAGTTAAAATAAGGCTAGTCCGTTATCAACTTGAAAAACTGGCACCGAGTCGGTGCTTTTTTACTCAGAGACCAAGAAACTTAAAATCATGATGGAAGGGTTTGGAGACGACGG
2650	ACCACGTCTCACACCGGAAGAAACTGAGAAGCATGAGTTTTAGAGCTAGAAATAGCAAGTTAAAATAAGGCTAGTCCGTTATCAACTTGAAAAACTGGCACCGAGTCGGTGCTTTTTTACTCAGCTACCAAGAAACTTACAATCATGACGGAAGGGTTTGGAGACGACGG
2654	ACCACGTCTCACACCGGAAGAAACTGAGAAGCATGAGTTTTAGAGCTAGAAATAGCAAGTTAAAATAAGGCTAGTCCGTTATCAACTTGAAAAACTGGCACCGAGTCGGTGCTTTTTTACTCATCCACCAAGAAACTTAGAATCATGGTGGAAGGGTTTGGAGACGACGG
2656	ACCACGTCTCACACCGGAAGAAACTGAGAAGCATGAGTTTTAGAGCTAGAAATAGCAAGTTAAAATAAGGCTAGTCCGTTATCAACTTGAAAAACTGGCACCGAGTCGGTGCTTTTTTACTCCACAACCAGGAAACTGACAATCATGATGGAAGGGTTTGGAGACGACGG
2662	ACCACGTCTCACACCGGAAGAAACTGAGAAGCATGAGTTTTAGAGCTAGAAATAGCAAGTTAAAATAAGGCTAGTCCGTTATCAACTTGAAAAACTGGCACCGAGTCGGTGCTTTTTTACTCGATCACGAAGAAAAGGAGAAGGAGGAGGGGGAGGTTTGGAGACGACGG
2672	ACCACGTCTCACACCGGAAGAAACTGAGAAGCATGAGTTTTAGAGCTAGAAATAGCAAGTTAAAATAAGGCTAGTCCGTTATCAACTTGAAAAACTGGCACCGAGTCGGTGCTTTTTTACTGAATAACGAAGAAACTGAGGCACAGGAAGGTCAGGTTTGGAGACGACGG
2679	ACCACGTCTCACACCGGAAGAAACTGAGAAGCATGAGTTTTAGAGCTAGAAATAGCAAGTTAAAATAAGGCTAGTCCGTTATCAACTTGAAAAACTGGCACCGAGTCGGTGCTTTTTTACTGAGTCACGAAGAAACTGAGGTTCAGGAAGGGGAGGTTTGGAGACGACGG
2707	ACCACGTCTCACACCGGAAGAAACTGAGAAGCATGAGTTTTAGAGCTAGAAATAGCAAGTTAAAATAAGGCTAGTCCGTTATCAACTTGAAAAACTGGCACCGAGTCGGTGCTTTTTTACTGTGTTACGAAGAGAATGAGAAGGATAAAGGAACAGTTTGGAGACGACGG
2708	ACCACGTCTCACACCGGAAGAAACTGAGAAGCATGAGTTTTAGAGCTAGAAATAGCAAGTTAAAATAAGGCTAGTCCGTTATCAACTTGAAAAACTGGCACCGAGTCGGTGCTTTTTTACTGTTCCACGAAGATACAGAGTAGAATGATGGTTACGTTTGGAGACGACGG
2713	ACCACGTCTCACACCGGAAGAAACTGAGAAGCATGAGTTTTAGAGCTAGAAATAGCAAGTTAAAATAAGGCTAGTCCGTTATCAACTTGAAAAACTGGCACCGAGTCGGTGCTTTTTTACGCTCATACAAAAAAGCAGAGAAGCATGAAGGAGGAGTTTGGAGACGACGG
2715	ACCACGTCTCACACCGGAAGAAACTGAGAAGCATGAGTTTTAGAGCTAGAAATAGCAAGTTAAAATAAGGCTAGTCCGTTATCAACTTGAAAAACTGGCACCGAGTCGGTGCTTTTTTACGCTCGTACAAAGAAAATGTGAAGAATGAGGGAAATGTTTGGAGACGACGG
2716	ACCACGTCTCACACCGGAAGAAACTGAGAAGCATGAGTTTTAGAGCTAGAAATAGCAAGTTAAAATAAGGCTAGTCCGTTATCAACTTGAAAAACTGGCACCGAGTCGGTGCTTTTTTACGCTCTAACAAAGAAACAGAGAAGTAAGAAGGAATGGTTTGGAGACGACGG
2717	ACCACGTCTCACACCGGAAGAAACTGAGAAGCATGAGTTTTAGAGCTAGAAATAGCAAGTTAAAATAAGGCTAGTCCGTTATCAACTTGAAAAACTGGCACCGAGTCGGTGCTTTTTTACGCTCTCACAAAGAAACAGAGCAGCTTGATGGAGGGGTTTGGAGACGACGG
2718	ACCACGTCTCACACCGGAAGAAACTGAGAAGCATGAGTTTTAGAGCTAGAAATAGCAAGTTAAAATAAGGCTAGTCCGTTATCAACTTGAAAAACTGGCACCGAGTCGGTGCTTTTTTACGCTCTGACAAAGAAACAGAGTAGGATGATGGCTGCGTTTGGAGACGACGG
2719	ACCACGTCTCACACCGGAAGAAACTGAGAAGCATGAGTTTTAGAGCTAGAAATAGCAAGTTAAAATAAGGCTAGTCCGTTATCAACTTGAAAAACTGGCACCGAGTCGGTGCTTTTTTACGCTGCAACAAAGAAACTTAGAAGTAGGAAGGGGGTGTTTGGAGACGACGG
2720	ACCACGTCTCACACCGGAAGAAACTGAGAAGCATGAGTTTTAGAGCTAGAAATAGCAAGTTAAAATAAGGCTAGTCCGTTATCAACTTGAAAAACTGGCACCGAGTCGGTGCTTTTTTACGCTGTCACAAGGAAACTGAGAAGCCAGAGGGTTTGGTTTGGAGACGACGG
2723	ACCACGTCTCACACCGGAAGAAACTGAGAAGCATGAGTTTTAGAGCTAGAAATAGCAAGTTAAAATAAGGCTAGTCCGTTATCAACTTGAAAAACTGGCACCGAGTCGGTGCTTTTTTACGCTTATACCAAGAAACTGAAAATCATCATGGAAGGGTTTGGAGACGACGG
2725	ACCACGTCTCACACCGGAAGAAACTGAGAAGCATGAGTTTTAGAGCTAGAAATAGCAAGTTAAAATAAGGCTAGTCCGTTATCAACTTGAAAAACTGGCACCGAGTCGGTGCTTTTTTACGGAAGAACCAAGAAACTTAGAATCATGATGGAAGGGTTTGGAGACGACGG
2728	ACCACGTCTCACACCGGAAGAAACTGAGAAGCATGAGTTTTAGAGCTAGAAATAGCAAGTTAAAATAAGGCTAGTCCGTTATCAACTTGAAAAACTGGCACCGAGTCGGTGCTTTTTTACGGAGTCACCAGGCAACTGAGAAGCATCAAGGCCTAGTTTGGAGACGACGG
2729	ACCACGTCTCACACCGGAAGAAACTGAGAAGCATGAGTTTTAGAGCTAGAAATAGCAAGTTAAAATAAGGCTAGTCCGTTATCAACTTGAAAAACTGGCACCGAGTCGGTGCTTTTTTACGGATACACCATGAAAATGAGAAGCCTGATGGGAACGTTTGGAGACGACGG
2730	ACCACGTCTCACACCGGAAGAAACTGAGAAGCATGAGTTTTAGAGCTAGAAATAGCAAGTTAAAATAAGGCTAGTCCGTTATCAACTTGAAAAACTGGCACCGAGTCGGTGCTTTTTTACGGATATACGAAAAAACTGAGACTCAGGAGGGTTGGGTTTGGAGACGACGG
2732	ACCACGTCTCACACCGGAAGAAACTGAGAAGCATGAGTTTTAGAGCTAGAAATAGCAAGTTAAAATAAGGCTAGTCCGTTATCAACTTGAAAAACTGGCACCGAGTCGGTGCTTTTTTACGGATCTACGAAAAACCTGAGAAGGTTGACGGGGCTGTTTGGAGACGACGG
2734	ACCACGTCTCACACCGGAAGAAACTGAGAAGCATGAGTTTTAGAGCTAGAAATAGCAAGTTAAAATAAGGCTAGTCCGTTATCAACTTGAAAAACTGGCACCGAGTCGGTGCTTTTTTACGGATGTACGAAAACACTGATGAGCATGAAGGTGAGGTTTGGAGACGACGG
2737	ACCACGTCTCACACCGGAAGAAACTGAGAAGCATGAGTTTTAGAGCTAGAAATAGCAAGTTAAAATAAGGCTAGTCCGTTATCAACTTGAAAAACTGGCACCGAGTCGGTGCTTTTTTACGGCACCACGAACAAAAGGAGAAACATGATGGTTTCGTTTGGAGACGACGG
2738	ACCACGTCTCACACCGGAAGAAACTGAGAAGCATGAGTTTTAGAGCTAGAAATAGCAAGTTAAAATAAGGCTAGTCCGTTATCAACTTGAAAAACTGGCACCGAGTCGGTGCTTTTTTACGGCACTACGAACAACCTGATAAGCAAGAAGGTTACGTTTGGAGACGACGG
2739	ACCACGTCTCACACCGGAAGAAACTGAGAAGCATGAGTTTTAGAGCTAGAAATAGCAAGTTAAAATAAGGCTAGTCCGTTATCAACTTGAAAAACTGGCACCGAGTCGGTGCTTTTTTACGGCATAACGAACAGACTCAGAAGAATGAAGGGCCCGTTTGGAGACGACGG
2740	ACCACGTCTCACACCGGAAGAAACTGAGAAGCATGAGTTTTAGAGCTAGAAATAGCAAGTTAAAATAAGGCTAGTCCGTTATCAACTTGAAAAACTGGCACCGAGTCGGTGCTTTTTTACGGCATCACGAAGAAAAAGAGAAAAATGAAGGAGTTGTTTGGAGACGACGG
2741	ACCACGTCTCACACCGGAAGAAACTGAGAAGCATGAGTTTTAGAGCTAGAAATAGCAAGTTAAAATAAGGCTAGTCCGTTATCAACTTGAAAAACTGGCACCGAGTCGGTGCTTTTTTACGGCATTACGAAGAAAAAGTGAAGGATGAGGGTGAAGTTTGGAGACGACGG
2742	ACCACGTCTCACACCGGAAGAAACTGAGAAGCATGAGTTTTAGAGCTAGAAATAGCAAGTTAAAATAAGGCTAGTCCGTTATCAACTTGAAAAACTGGCACCGAGTCGGTGCTTTTTTACGGCGATACGAAGAAAATGAGAAGCCGCATGGATGAGTTTGGAGACGACGG
2745	ACCACGTCTCACACCGGAAGAAACTGAGAAGCATGAGTTTTAGAGCTAGAAATAGCAAGTTAAAATAAGGCTAGTCCGTTATCAACTTGAAAAACTGGCACCGAGTCGGTGCTTTTTTACGGCTCTACGAAGAAACAGAGAAGCATGTGGGATTTGTTTGGAGACGACGG
2746	ACCACGTCTCACACCGGAAGAAACTGAGAAGCATGAGTTTTAGAGCTAGAAATAGCAAGTTAAAATAAGGCTAGTCCGTTATCAACTTGAAAAACTGGCACCGAGTCGGTGCTTTTTTACGGTACCACGAAGAAACCGAGATCCAAGAGGGAATAGTTTGGAGACGACGG
2748	ACCACGTCTCACACCGGAAGAAACTGAGAAGCATGAGTTTTAGAGCTAGAAATAGCAAGTTAAAATAAGGCTAGTCCGTTATCAACTTGAAAAACTGGCACCGAGTCGGTGCTTTTTTACGGTATGACGAAGAAACTCACAAGCATAGGGGAATGGTTTGGAGACGACGG
2749	ACCACGTCTCACACCGGAAGAAACTGAGAAGCATGAGTTTTAGAGCTAGAAATAGCAAGTTAAAATAAGGCTAGTCCGTTATCAACTTGAAAAACTGGCACCGAGTCGGTGCTTTTTTACGGTCAGACGAAGAAACTCAGATGCTAGATGGTAAAGTTTGGAGACGACGG
2750	ACCACGTCTCACACCGGAAGAAACTGAGAAGCATGAGTTTTAGAGCTAGAAATAGCAAGTTAAAATAAGGCTAGTCCGTTATCAACTTGAAAAACTGGCACCGAGTCGGTGCTTTTTTACGGTCCGACGAAGAAACTGAGAAACAAAGGGGTGAAGTTTGGAGACGACGG
2752	ACCACGTCTCACACCGGAAGAAACTGAGAAGCATGAGTTTTAGAGCTAGAAATAGCAAGTTAAAATAAGGCTAGTCCGTTATCAACTTGAAAAACTGGCACCGAGTCGGTGCTTTTTTACGGTCGTACGAAGAAACTGAGAAGAAGCATGGAGGAGTTTGGAGACGACGG
2753	ACCACGTCTCACACCGGAAGAAACTGAGAAGCATGAGTTTTAGAGCTAGAAATAGCAAGTTAAAATAAGGCTAGTCCGTTATCAACTTGAAAAACTGGCACCGAGTCGGTGCTTTTTTACGGTCTGACGAAGAAACTGAGAAGCAAAGAGGTTATGTTTGGAGACGACGG
2754	ACCACGTCTCACACCGGAAGAAACTGAGAAGCATGAGTTTTAGAGCTAGAAATAGCAAGTTAAAATAAGGCTAGTCCGTTATCAACTTGAAAAACTGGCACCGAGTCGGTGCTTTTTTACGGTGACACGAAGAAACTGAGAAGGGGGCAGGCAGGGTTTGGAGACGACGG
2756	ACCACGTCTCACACCGGAAGAAACTGAGAAGCATGAGTTTTAGAGCTAGAAATAGCAAGTTAAAATAAGGCTAGTCCGTTATCAACTTGAAAAACTGGCACCGAGTCGGTGCTTTTTTACGGTGGTACGAAGAAACTGAGAATGCTGCTGGAATAGTTTGGAGACGACGG
2757	ACCACGTCTCACACCGGAAGAAACTGAGAAGCATGAGTTTTAGAGCTAGAAATAGCAAGTTAAAATAAGGCTAGTCCGTTATCAACTTGAAAAACTGGCACCGAGTCGGTGCTTTTTTACGTAACAACGAAGAAACTGAGACTCAGGGAGGCGAAGTTTGGAGACGACGG
2758	ACCACGTCTCACACCGGAAGAAACTGAGAAGCATGAGTTTTAGAGCTAGAAATAGCAAGTTAAAATAAGGCTAGTCCGTTATCAACTTGAAAAACTGGCACCGAGTCGGTGCTTTTTTACGTAACGACGAAGAAACTGAGACTTATTAAGGATTAGTTTGGAGACGACGG
2759	ACCACGTCTCACACCGGAAGAAACTGAGAAGCATGAGTTTTAGAGCTAGAAATAGCAAGTTAAAATAAGGCTAGTCCGTTATCAACTTGAAAAACTGGCACCGAGTCGGTGCTTTTTTACGTACCAACGAAGAAACTGAGGCACATGGAGGTTAAGTTTGGAGACGACGG
2760	ACCACGTCTCACACCGGAAGAAACTGAGAAGCATGAGTTTTAGAGCTAGAAATAGCAAGTTAAAATAAGGCTAGTCCGTTATCAACTTGAAAAACTGGCACCGAGTCGGTGCTTTTTTACGTAGATACGAAGAAACTGAGGCTTATGAAGGTTAAGTTTGGAGACGACGG
2761	ACCACGTCTCACACCGGAAGAAACTGAGAAGCATGAGTTTTAGAGCTAGAAATAGCAAGTTAAAATAAGGCTAGTCCGTTATCAACTTGAAAAACTGGCACCGAGTCGGTGCTTTTTTACGTAGCAACGAAGAAACTGAGGGGCAGAAAGGATTTGTTTGGAGACGACGG
2763	ACCACGTCTCACACCGGAAGAAACTGAGAAGCATGAGTTTTAGAGCTAGAAATAGCAAGTTAAAATAAGGCTAGTCCGTTATCAACTTGAAAAACTGGCACCGAGTCGGTGCTTTTTTACGTAGGTACGAAGAAACTGAGGTGCAGAATGGTTACGTTTGGAGACGACGG
2764	ACCACGTCTCACACCGGAAGAAACTGAGAAGCATGAGTTTTAGAGCTAGAAATAGCAAGTTAAAATAAGGCTAGTCCGTTATCAACTTGAAAAACTGGCACCGAGTCGGTGCTTTTTTACGTAGTGACGAAGAAACTGAGGTGCATAAAGGTTAAGTTTGGAGACGACGG
2765	ACCACGTCTCACACCGGAAGAAACTGAGAAGCATGAGTTTTAGAGCTAGAAATAGCAAGTTAAAATAAGGCTAGTCCGTTATCAACTTGAAAAACTGGCACCGAGTCGGTGCTTTTTTACGTATACACGAAGAAACTGATAGCCTTGATGGATACGTTTGGAGACGACGG
2766	ACCACGTCTCACACCGGAAGAAACTGAGAAGCATGAGTTTTAGAGCTAGAAATAGCAAGTTAAAATAAGGCTAGTCCGTTATCAACTTGAAAAACTGGCACCGAGTCGGTGCTTTTTTACGTATATACGAAGAAACTGGGAAGGAAGAGGGGAAGGTTTGGAGACGACGG
2767	ACCACGTCTCACACCGGAAGAAACTGAGAAGCATGAGTTTTAGAGCTAGAAATAGCAAGTTAAAATAAGGCTAGTCCGTTATCAACTTGAAAAACTGGCACCGAGTCGGTGCTTTTTTACGTATCAACGAAGAAACTGGGAGACATGGAGGAAATGTTTGGAGACGACGG
2768	ACCACGTCTCACACCGGAAGAAACTGAGAAGCATGAGTTTTAGAGCTAGAAATAGCAAGTTAAAATAAGGCTAGTCCGTTATCAACTTGAAAAACTGGCACCGAGTCGGTGCTTTTTTACGTATGCACGAAGAAACTTACCAGAATGATGGATCTGTTTGGAGACGACGG
2769	ACCACGTCTCACACCGGAAGAAACTGAGAAGCATGAGTTTTAGAGCTAGAAATAGCAAGTTAAAATAAGGCTAGTCCGTTATCAACTTGAAAAACTGGCACCGAGTCGGTGCTTTTTTACGTCACGACGAAGAAAGCTATAAGCATGAAGGCCTAGTTTGGAGACGACGG
2770	ACCACGTCTCACACCGGAAGAAACTGAGAAGCATGAGTTTTAGAGCTAGAAATAGCAAGTTAAAATAAGGCTAGTCCGTTATCAACTTGAAAAACTGGCACCGAGTCGGTGCTTTTTTACGTCAGTACGAAGAAAGTGAAAAGGATGCTGGGGAGGTTTGGAGACGACGG
2771	ACCACGTCTCACACCGGAAGAAACTGAGAAGCATGAGTTTTAGAGCTAGAAATAGCAAGTTAAAATAAGGCTAGTCCGTTATCAACTTGAAAAACTGGCACCGAGTCGGTGCTTTTTTACGTCATGACGAAGAAAGTGAGAAACACTAAGGTTGAGTTTGGAGACGACGG
2772	ACCACGTCTCACACCGGAAGAAACTGAGAAGCATGAGTTTTAGAGCTAGAAATAGCAAGTTAAAATAAGGCTAGTCCGTTATCAACTTGAAAAACTGGCACCGAGTCGGTGCTTTTTTACGTCCAGACGAAGAAAGTGAGAAGAAGGCAGGTGGGGTTTGGAGACGACGG
2773	ACCACGTCTCACACCGGAAGAAACTGAGAAGCATGAGTTTTAGAGCTAGAAATAGCAAGTTAAAATAAGGCTAGTCCGTTATCAACTTGAAAAACTGGCACCGAGTCGGTGCTTTTTTACGTCCATACGAAGAAAGTTAGAAAGATGAAGGAAGGGTTTGGAGACGACGG
2774	ACCACGTCTCACACCGGAAGAAACTGAGAAGCATGAGTTTTAGAGCTAGAAATAGCAAGTTAAAATAAGGCTAGTCCGTTATCAACTTGAAAAACTGGCACCGAGTCGGTGCTTTTTTACGTCGATACGAAGAAATTGAGAAGGATTGTGGTTCCGTTTGGAGACGACGG
2775	ACCACGTCTCACACCGGAAGAAACTGAGAAGCATGAGTTTTAGAGCTAGAAATAGCAAGTTAAAATAAGGCTAGTCCGTTATCAACTTGAAAAACTGGCACCGAGTCGGTGCTTTTTTACGTCGCCACGAAGAAATTGAGACACAGGAAGGTCTAGTTTGGAGACGACGG
2776	ACCACGTCTCACACCGGAAGAAACTGAGAAGCATGAGTTTTAGAGCTAGAAATAGCAAGTTAAAATAAGGCTAGTCCGTTATCAACTTGAAAAACTGGCACCGAGTCGGTGCTTTTTTACGTCGCGACGAAGAAGCTGAAAAGCTGGAAGGAACAGTTTGGAGACGACGG
2777	ACCACGTCTCACACCGGAAGAAACTGAGAAGCATGAGTTTTAGAGCTAGAAATAGCAAGTTAAAATAAGGCTAGTCCGTTATCAACTTGAAAAACTGGCACCGAGTCGGTGCTTTTTTACGTCGCTACGAAGAAGCTGAGAAGTAGGTAGGGGGCGTTTGGAGACGACGG
2778	ACCACGTCTCACACCGGAAGAAACTGAGAAGCATGAGTTTTAGAGCTAGAAATAGCAAGTTAAAATAAGGCTAGTCCGTTATCAACTTGAAAAACTGGCACCGAGTCGGTGCTTTTTTACGTCGTGACGAAGAAGTTGAGAAACATGTTGGTAAAGTTTGGAGACGACGG
2779	ACCACGTCTCACACCGGAAGAAACTGAGAAGCATGAGTTTTAGAGCTAGAAATAGCAAGTTAAAATAAGGCTAGTCCGTTATCAACTTGAAAAACTGGCACCGAGTCGGTGCTTTTTTACGTCGTTACGAAGAATATGAGAAGCCAGAGGGCAAGGTTTGGAGACGACGG
2780	ACCACGTCTCACACCGGAAGAAACTGAGAAGCATGAGTTTTAGAGCTAGAAATAGCAAGTTAAAATAAGGCTAGTCCGTTATCAACTTGAAAAACTGGCACCGAGTCGGTGCTTTTTTACGTCTACACGAAGAATCTGAAGAGCATGGAGGTATTGTTTGGAGACGACGG
2781	ACCACGTCTCACACCGGAAGAAACTGAGAAGCATGAGTTTTAGAGCTAGAAATAGCAAGTTAAAATAAGGCTAGTCCGTTATCAACTTGAAAAACTGGCACCGAGTCGGTGCTTTTTTACGTGTGTACGAAGACACTGAGGACCATGATGGGGCAGTTTGGAGACGACGG
2783	ACCACGTCTCACACCGGAAGAAACTGAGAAGCATGAGTTTTAGAGCTAGAAATAGCAAGTTAAAATAAGGCTAGTCCGTTATCAACTTGAAAAACTGGCACCGAGTCGGTGCTTTTTTACGTTAATACGAAGAGACTGAGAATCAATAAGGAGTCGTTTGGAGACGACGG
2784	ACCACGTCTCACACCGGAAGAAACTGAGAAGCATGAGTTTTAGAGCTAGAAATAGCAAGTTAAAATAAGGCTAGTCCGTTATCAACTTGAAAAACTGGCACCGAGTCGGTGCTTTTTTACGTTACGACGAAGAGACTGAGAGGTAGGAAGGGAACGTTTGGAGACGACGG
2785	ACCACGTCTCACACCGGAAGAAACTGAGAAGCATGAGTTTTAGAGCTAGAAATAGCAAGTTAAAATAAGGCTAGTCCGTTATCAACTTGAAAAACTGGCACCGAGTCGGTGCTTTTTTACGTTATAACGAAGAGAGTGAGAAGGATGATGGCAGCGTTTGGAGACGACGG
2786	ACCACGTCTCACACCGGAAGAAACTGAGAAGCATGAGTTTTAGAGCTAGAAATAGCAAGTTAAAATAAGGCTAGTCCGTTATCAACTTGAAAAACTGGCACCGAGTCGGTGCTTTTTTACGTTCAGACGAAGAGCTAGAGAAGCATGACGGTTTGGTTTGGAGACGACGG
2787	ACCACGTCTCACACCGGAAGAAACTGAGAAGCATGAGTTTTAGAGCTAGAAATAGCAAGTTAAAATAAGGCTAGTCCGTTATCAACTTGAAAAACTGGCACCGAGTCGGTGCTTTTTTACGTTCCAACGAAGAGGCTGATAAGCATGTGGGAGAGGTTTGGAGACGACGG
2788	ACCACGTCTCACACCGGAAGAAACTGAGAAGCATGAGTTTTAGAGCTAGAAATAGCAAGTTAAAATAAGGCTAGTCCGTTATCAACTTGAAAAACTGGCACCGAGTCGGTGCTTTTTTACGTTCGCACGAAGATACAGAAAAGCATGTTGGAGTGGTTTGGAGACGACGG
2790	ACCACGTCTCACACCGGAAGAAACTGAGAAGCATGAGTTTTAGAGCTAGAAATAGCAAGTTAAAATAAGGCTAGTCCGTTATCAACTTGAAAAACTGGCACCGAGTCGGTGCTTTTTTACGTTCTGACGAAGCGAGTGAGAGGCATGAAGGACCCGTTTGGAGACGACGG
2791	ACCACGTCTCACACCGGAAGAAACTGAGAAGCATGAGTTTTAGAGCTAGAAATAGCAAGTTAAAATAAGGCTAGTCCGTTATCAACTTGAAAAACTGGCACCGAGTCGGTGCTTTTTTACGTTCTTACGAAGCTACTGGCAAGCATGAGGGGAGGGTTTGGAGACGACGG
2794	ACCACGTCTCACACCGGAAGAAACTGAGAAGCATGAGTTTTAGAGCTAGAAATAGCAAGTTAAAATAAGGCTAGTCCGTTATCAACTTGAAAAACTGGCACCGAGTCGGTGCTTTTTTACGTTGGTACGAAGTAACAAAGAAGAATGAGGGGAAGGTTTGGAGACGACGG
2795	ACCACGTCTCACACCGGAAGAAACTGAGAAGCATGAGTTTTAGAGCTAGAAATAGCAAGTTAAAATAAGGCTAGTCCGTTATCAACTTGAAAAACTGGCACCGAGTCGGTGCTTTTTTACGTTGTGACGAAGTAACAGAGGTGCATGATGGAGTGGTTTGGAGACGACGG
2796	ACCACGTCTCACACCGGAAGAAACTGAGAAGCATGAGTTTTAGAGCTAGAAATAGCAAGTTAAAATAAGGCTAGTCCGTTATCAACTTGAAAAACTGGCACCGAGTCGGTGCTTTTTTACTAACAGACGAAGTCACTGAGAAGCTTAAGGGAAGAGTTTGGAGACGACGG
2797	ACCACGTCTCACACCGGAAGAAACTGAGAAGCATGAGTTTTAGAGCTAGAAATAGCAAGTTAAAATAAGGCTAGTCCGTTATCAACTTGAAAAACTGGCACCGAGTCGGTGCTTTTTTACTAACTTACGAATAATTTGAGAAACATGATGGTTATGTTTGGAGACGACGG
2798	ACCACGTCTCACACCGGAAGAAACTGAGAAGCATGAGTTTTAGAGCTAGAAATAGCAAGTTAAAATAAGGCTAGTCCGTTATCAACTTGAAAAACTGGCACCGAGTCGGTGCTTTTTTACTAAGACACGAATACACTGAGAAGCAAAATGGAGGCGTTTGGAGACGACGG
2799	ACCACGTCTCACACCGGAAGAAACTGAGAAGCATGAGTTTTAGAGCTAGAAATAGCAAGTTAAAATAAGGCTAGTCCGTTATCAACTTGAAAAACTGGCACCGAGTCGGTGCTTTTTTACTAAGCAACGACAAAACTGAAAAGCATGGCGGGTAAGTTTGGAGACGACGG
2800	ACCACGTCTCACACCGGAAGAAACTGAGAAGCATGAGTTTTAGAGCTAGAAATAGCAAGTTAAAATAAGGCTAGTCCGTTATCAACTTGAAAAACTGGCACCGAGTCGGTGCTTTTTTACTAAGCTACGAGAAAACTCAGAAGCATGCAGGGGACGTTTGGAGACGACGG
2801	ACCACGTCTCACACCGGAAGAAACTGAGAAGCATGAGTTTTAGAGCTAGAAATAGCAAGTTAAAATAAGGCTAGTCCGTTATCAACTTGAAAAACTGGCACCGAGTCGGTGCTTTTTTACTAATACACGAGGAAAAAGAGAAGCATGCTGGTAAAGTTTGGAGACGACGG
2802	ACCACGTCTCACACCGGAAGAAACTGAGAAGCATGAGTTTTAGAGCTAGAAATAGCAAGTTAAAATAAGGCTAGTCCGTTATCAACTTGAAAAACTGGCACCGAGTCGGTGCTTTTTTACTAATATACGAGGAAAATGGGAAGCATGGAGGGCATGTTTGGAGACGACGG
2803	ACCACGTCTCACACCGGAAGAAACTGAGAAGCATGAGTTTTAGAGCTAGAAATAGCAAGTTAAAATAAGGCTAGTCCGTTATCAACTTGAAAAACTGGCACCGAGTCGGTGCTTTTTTACTAATCAACGAGGAAACGGAGAAGAATTAAGGCTGTGTTTGGAGACGACGG
2804	ACCACGTCTCACACCGGAAGAAACTGAGAAGCATGAGTTTTAGAGCTAGAAATAGCAAGTTAAAATAAGGCTAGTCCGTTATCAACTTGAAAAACTGGCACCGAGTCGGTGCTTTTTTACTAATGTACGAGGAAACTGAGAACCACGAAGGTTAAGTTTGGAGACGACGG
2805	ACCACGTCTCACACCGGAAGAAACTGAGAAGCATGAGTTTTAGAGCTAGAAATAGCAAGTTAAAATAAGGCTAGTCCGTTATCAACTTGAAAAACTGGCACCGAGTCGGTGCTTTTTTACTAATTCACGAGGAAACTGAGAACCAGGTAGGTTAAGTTTGGAGACGACGG
2807	ACCACGTCTCACACCGGAAGAAACTGAGAAGCATGAGTTTTAGAGCTAGAAATAGCAAGTTAAAATAAGGCTAGTCCGTTATCAACTTGAAAAACTGGCACCGAGTCGGTGCTTTTTTACTACAGCACGAGGAAACTGAGACCCAGGAAGGCTAAGTTTGGAGACGACGG
2808	ACCACGTCTCACACCGGAAGAAACTGAGAAGCATGAGTTTTAGAGCTAGAAATAGCAAGTTAAAATAAGGCTAGTCCGTTATCAACTTGAAAAACTGGCACCGAGTCGGTGCTTTTTTACTACCATACGAGGAAACTGAGATACAGGAAGGTGAGGTTTGGAGACGACGG
2809	ACCACGTCTCACACCGGAAGAAACTGAGAAGCATGAGTTTTAGAGCTAGAAATAGCAAGTTAAAATAAGGCTAGTCCGTTATCAACTTGAAAAACTGGCACCGAGTCGGTGCTTTTTTACTACCGAACGAGGAAACTGAGATGCAACACGGTCATGTTTGGAGACGACGG
2810	ACCACGTCTCACACCGGAAGAAACTGAGAAGCATGAGTTTTAGAGCTAGAAATAGCAAGTTAAAATAAGGCTAGTCCGTTATCAACTTGAAAAACTGGCACCGAGTCGGTGCTTTTTTACTACCTAACGAGGAAACTGAGGATCAGGATGGCAAAGTTTGGAGACGACGG
2811	ACCACGTCTCACACCGGAAGAAACTGAGAAGCATGAGTTTTAGAGCTAGAAATAGCAAGTTAAAATAAGGCTAGTCCGTTATCAACTTGAAAAACTGGCACCGAGTCGGTGCTTTTTTACTACCTGACGAGGAAACTGAGGTGCAAGAAGGTTGGGTTTGGAGACGACGG
2812	ACCACGTCTCACACCGGAAGAAACTGAGAAGCATGAGTTTTAGAGCTAGAAATAGCAAGTTAAAATAAGGCTAGTCCGTTATCAACTTGAAAAACTGGCACCGAGTCGGTGCTTTTTTACTACGCGACGAGGAACCTGACAAGAATGAAGGACTCGTTTGGAGACGACGG
2813	ACCACGTCTCACACCGGAAGAAACTGAGAAGCATGAGTTTTAGAGCTAGAAATAGCAAGTTAAAATAAGGCTAGTCCGTTATCAACTTGAAAAACTGGCACCGAGTCGGTGCTTTTTTACTACGGCACGAGGAAGCTGAGCAGCATCAGGGCCCCGTTTGGAGACGACGG
2815	ACCACGTCTCACACCGGAAGAAACTGAGAAGCATGAGTTTTAGAGCTAGAAATAGCAAGTTAAAATAAGGCTAGTCCGTTATCAACTTGAAAAACTGGCACCGAGTCGGTGCTTTTTTACTACGTCACGAGGATACTGAGAATCAGGATGGGGAAGTTTGGAGACGACGG
2816	ACCACGTCTCACACCGGAAGAAACTGAGAAGCATGAGTTTTAGAGCTAGAAATAGCAAGTTAAAATAAGGCTAGTCCGTTATCAACTTGAAAAACTGGCACCGAGTCGGTGCTTTTTTACTACTATACGATGAAACTGAGAGGCAGGTGGGTTAAGTTTGGAGACGACGG
2817	ACCACGTCTCACACCGGAAGAAACTGAGAAGCATGAGTTTTAGAGCTAGAAATAGCAAGTTAAAATAAGGCTAGTCCGTTATCAACTTGAAAAACTGGCACCGAGTCGGTGCTTTTTTACTACTCGACGATGAAGCTGAGAAGCTTCAGGGAGAGGTTTGGAGACGACGG
2818	ACCACGTCTCACACCGGAAGAAACTGAGAAGCATGAGTTTTAGAGCTAGAAATAGCAAGTTAAAATAAGGCTAGTCCGTTATCAACTTGAAAAACTGGCACCGAGTCGGTGCTTTTTTACTAGAAGACGCAGAAAATGAGAGGTATGAGGGTAACGTTTGGAGACGACGG
2819	ACCACGTCTCACACCGGAAGAAACTGAGAAGCATGAGTTTTAGAGCTAGAAATAGCAAGTTAAAATAAGGCTAGTCCGTTATCAACTTGAAAAACTGGCACCGAGTCGGTGCTTTTTTACTAGATAACGCAGAAAGTGAGGAGCATAATGGCCCTGTTTGGAGACGACGG
2820	ACCACGTCTCACACCGGAAGAAACTGAGAAGCATGAGTTTTAGAGCTAGAAATAGCAAGTTAAAATAAGGCTAGTCCGTTATCAACTTGAAAAACTGGCACCGAGTCGGTGCTTTTTTACTAGATGACGCAGAAAGTGAGTGGCATGAAGGTTGGGTTTGGAGACGACGG
2821	ACCACGTCTCACACCGGAAGAAACTGAGAAGCATGAGTTTTAGAGCTAGAAATAGCAAGTTAAAATAAGGCTAGTCCGTTATCAACTTGAAAAACTGGCACCGAGTCGGTGCTTTTTTACTAGCAGACGCAGAAGCAGAGAAGCATGAGGGAAAAGTTTGGAGACGACGG
2822	ACCACGTCTCACACCGGAAGAAACTGAGAAGCATGAGTTTTAGAGCTAGAAATAGCAAGTTAAAATAAGGCTAGTCCGTTATCAACTTGAAAAACTGGCACCGAGTCGGTGCTTTTTTACTAGCGAACGGAAAAACTGAGAAGCAATAGGGAACTGTTTGGAGACGACGG
2824	ACCACGTCTCACACCGGAAGAAACTGAGAAGCATGAGTTTTAGAGCTAGAAATAGCAAGTTAAAATAAGGCTAGTCCGTTATCAACTTGAAAAACTGGCACCGAGTCGGTGCTTTTTTACTAGCTGACGGAGAAACTGAAGAGCAAGAAGGAAAGGTTTGGAGACGACGG
2825	ACCACGTCTCACACCGGAAGAAACTGAGAAGCATGAGTTTTAGAGCTAGAAATAGCAAGTTAAAATAAGGCTAGTCCGTTATCAACTTGAAAAACTGGCACCGAGTCGGTGCTTTTTTACTAGGACACGGAGAAACTGAGACCCATGGGGGTGCAGTTTGGAGACGACGG
2826	ACCACGTCTCACACCGGAAGAAACTGAGAAGCATGAGTTTTAGAGCTAGAAATAGCAAGTTAAAATAAGGCTAGTCCGTTATCAACTTGAAAAACTGGCACCGAGTCGGTGCTTTTTTACTAGGCAACGGAGAAATTGAGAAGCAACAGGGCATAGTTTGGAGACGACGG
2827	ACCACGTCTCACACCGGAAGAAACTGAGAAGCATGAGTTTTAGAGCTAGAAATAGCAAGTTAAAATAAGGCTAGTCCGTTATCAACTTGAAAAACTGGCACCGAGTCGGTGCTTTTTTACTAGGCTACGGAGACACTGAGAATCATGAGGGCAGGGTTTGGAGACGACGG
2829	ACCACGTCTCACACCGGAAGAAACTGAGAAGCATGAGTTTTAGAGCTAGAAATAGCAAGTTAAAATAAGGCTAGTCCGTTATCAACTTGAAAAACTGGCACCGAGTCGGTGCTTTTTTACTAGGTGACGGAGAGACTGAGAAGGCTGAAGGGTATGTTTGGAGACGACGG
2830	ACCACGTCTCACACCGGAAGAAACTGAGAAGCATGAGTTTTAGAGCTAGAAATAGCAAGTTAAAATAAGGCTAGTCCGTTATCAACTTGAAAAACTGGCACCGAGTCGGTGCTTTTTTACTAGTAGACGGAGGCACTGAGAAGGATGATGGATTTGTTTGGAGACGACGG
2831	ACCACGTCTCACACCGGAAGAAACTGAGAAGCATGAGTTTTAGAGCTAGAAATAGCAAGTTAAAATAAGGCTAGTCCGTTATCAACTTGAAAAACTGGCACCGAGTCGGTGCTTTTTTACTAGTCTACGGGGAAACTGAGGACCATGAAGGAGCAGTTTGGAGACGACGG
2832	ACCACGTCTCACACCGGAAGAAACTGAGAAGCATGAGTTTTAGAGCTAGAAATAGCAAGTTAAAATAAGGCTAGTCCGTTATCAACTTGAAAAACTGGCACCGAGTCGGTGCTTTTTTACTAGTGAACGGTGAAGCTGAGAAGAATGAAGGTGGTGTTTGGAGACGACGG
2833	ACCACGTCTCACACCGGAAGAAACTGAGAAGCATGAGTTTTAGAGCTAGAAATAGCAAGTTAAAATAAGGCTAGTCCGTTATCAACTTGAAAAACTGGCACCGAGTCGGTGCTTTTTTACTAGTGCACGTAAAAACTGAAAAACATGAAGGGGATGTTTGGAGACGACGG
2834	ACCACGTCTCACACCGGAAGAAACTGAGAAGCATGAGTTTTAGAGCTAGAAATAGCAAGTTAAAATAAGGCTAGTCCGTTATCAACTTGAAAAACTGGCACCGAGTCGGTGCTTTTTTACTAGTGGACGTAGAAAGTGAGACCCATGAGGGCAGGGTTTGGAGACGACGG
2835	ACCACGTCTCACACCGGAAGAAACTGAGAAGCATGAGTTTTAGAGCTAGAAATAGCAAGTTAAAATAAGGCTAGTCCGTTATCAACTTGAAAAACTGGCACCGAGTCGGTGCTTTTTTACTAGTTCACGTAGAAATTGAGATCCATGAAGGCAGGGTTTGGAGACGACGG
2837	ACCACGTCTCACACCGGAAGAAACTGAGAAGCATGAGTTTTAGAGCTAGAAATAGCAAGTTAAAATAAGGCTAGTCCGTTATCAACTTGAAAAACTGGCACCGAGTCGGTGCTTTTTTACTATAATACGTGGAAACAGAGAAGCAGGACGGCCGAGTTTGGAGACGACGG
2838	ACCACGTCTCACACCGGAAGAAACTGAGAAGCATGAGTTTTAGAGCTAGAAATAGCAAGTTAAAATAAGGCTAGTCCGTTATCAACTTGAAAAACTGGCACCGAGTCGGTGCTTTTTTACTATACTACTAAGAAAACAAGAAGCATGAAGGGTCTGTTTGGAGACGACGG
2839	ACCACGTCTCACACCGGAAGAAACTGAGAAGCATGAGTTTTAGAGCTAGAAATAGCAAGTTAAAATAAGGCTAGTCCGTTATCAACTTGAAAAACTGGCACCGAGTCGGTGCTTTTTTACTATAGCACTAAGAAACTGAGCAGAAGGAGGGGGTGGTTTGGAGACGACGG
2840	ACCACGTCTCACACCGGAAGAAACTGAGAAGCATGAGTTTTAGAGCTAGAAATAGCAAGTTAAAATAAGGCTAGTCCGTTATCAACTTGAAAAACTGGCACCGAGTCGGTGCTTTTTTACTATAGTACTAAGAAAGTGGGAATCATGATGGTGAGGTTTGGAGACGACGG
2841	ACCACGTCTCACACCGGAAGAAACTGAGAAGCATGAGTTTTAGAGCTAGAAATAGCAAGTTAAAATAAGGCTAGTCCGTTATCAACTTGAAAAACTGGCACCGAGTCGGTGCTTTTTTACTATCATACTCAGACACAGAGAAGCATGAGGGGGAGGTTTGGAGACGACGG
2842	ACCACGTCTCACACCGGAAGAAACTGAGAAGCATGAGTTTTAGAGCTAGAAATAGCAAGTTAAAATAAGGCTAGTCCGTTATCAACTTGAAAAACTGGCACCGAGTCGGTGCTTTTTTACTATCTAACAAAGAAAATGAGAACCATGAAGGCAAAGTTTGGAGACGACGG
2843	ACCACGTCTCACACCGGAAGAAACTGAGAAGCATGAGTTTTAGAGCTAGAAATAGCAAGTTAAAATAAGGCTAGTCCGTTATCAACTTGAAAAACTGGCACCGAGTCGGTGCTTTTTTACTATCTCACAAAGAAAATTGGAAGCATGAAGGACACGTTTGGAGACGACGG
2844	ACCACGTCTCACACCGGAAGAAACTGAGAAGCATGAGTTTTAGAGCTAGAAATAGCAAGTTAAAATAAGGCTAGTCCGTTATCAACTTGAAAAACTGGCACCGAGTCGGTGCTTTTTTACTATCTGACAAAGAAACAAAGTAGCATGATGGACAGGTTTGGAGACGACGG
2845	ACCACGTCTCACACCGGAAGAAACTGAGAAGCATGAGTTTTAGAGCTAGAAATAGCAAGTTAAAATAAGGCTAGTCCGTTATCAACTTGAAAAACTGGCACCGAGTCGGTGCTTTTTTACTATGCAACAAAGAAACCAAGAAGCAGGAGGGGCTGGTTTGGAGACGACGG
2846	ACCACGTCTCACACCGGAAGAAACTGAGAAGCATGAGTTTTAGAGCTAGAAATAGCAAGTTAAAATAAGGCTAGTCCGTTATCAACTTGAAAAACTGGCACCGAGTCGGTGCTTTTTTACTATGCGACAAAGAAACTCATAAGGATGATGGTGGAGTTTGGAGACGACGG
2847	ACCACGTCTCACACCGGAAGAAACTGAGAAGCATGAGTTTTAGAGCTAGAAATAGCAAGTTAAAATAAGGCTAGTCCGTTATCAACTTGAAAAACTGGCACCGAGTCGGTGCTTTTTTACTATGGAACAAAGAAACTGAGACACATAAAGGTTAGGTTTGGAGACGACGG
2848	ACCACGTCTCACACCGGAAGAAACTGAGAAGCATGAGTTTTAGAGCTAGAAATAGCAAGTTAAAATAAGGCTAGTCCGTTATCAACTTGAAAAACTGGCACCGAGTCGGTGCTTTTTTACTATGTCACAAAGAAACTGAGATGCCTAAAGGCTGAGTTTGGAGACGACGG
2849	ACCACGTCTCACACCGGAAGAAACTGAGAAGCATGAGTTTTAGAGCTAGAAATAGCAAGTTAAAATAAGGCTAGTCCGTTATCAACTTGAAAAACTGGCACCGAGTCGGTGCTTTTTTACTATGTGACAAAGAAACTGAGATTCAGGAGGGTTAAGTTTGGAGACGACGG
2850	ACCACGTCTCACACCGGAAGAAACTGAGAAGCATGAGTTTTAGAGCTAGAAATAGCAAGTTAAAATAAGGCTAGTCCGTTATCAACTTGAAAAACTGGCACCGAGTCGGTGCTTTTTTACTATGTTACAAAGAAACTGCCCAGCATGATGGGGGCGTTTGGAGACGACGG
2851	ACCACGTCTCACACCGGAAGAAACTGAGAAGCATGAGTTTTAGAGCTAGAAATAGCAAGTTAAAATAAGGCTAGTCCGTTATCAACTTGAAAAACTGGCACCGAGTCGGTGCTTTTTTACTATTGTACAAAGCAACAGAGAAGCAGGAGGGTGATGTTTGGAGACGACGG
2852	ACCACGTCTCACACCGGAAGAAACTGAGAAGCATGAGTTTTAGAGCTAGAAATAGCAAGTTAAAATAAGGCTAGTCCGTTATCAACTTGAAAAACTGGCACCGAGTCGGTGCTTTTTTACTCAACAACAAAGCAACAGCGAAGCATGAAGGATTCGTTTGGAGACGACGG
2853	ACCACGTCTCACACCGGAAGAAACTGAGAAGCATGAGTTTTAGAGCTAGAAATAGCAAGTTAAAATAAGGCTAGTCCGTTATCAACTTGAAAAACTGGCACCGAGTCGGTGCTTTTTTACTCAAGAACAAGGAAACTCTGAAGCATGATGGTTTCGTTTGGAGACGACGG
2854	ACCACGTCTCACACCGGAAGAAACTGAGAAGCATGAGTTTTAGAGCTAGAAATAGCAAGTTAAAATAAGGCTAGTCCGTTATCAACTTGAAAAACTGGCACCGAGTCGGTGCTTTTTTACTCAAGTACACAGAAACAGAGAAGAATGAAGGTGCTGTTTGGAGACGACGG
2855	ACCACGTCTCACACCGGAAGAAACTGAGAAGCATGAGTTTTAGAGCTAGAAATAGCAAGTTAAAATAAGGCTAGTCCGTTATCAACTTGAAAAACTGGCACCGAGTCGGTGCTTTTTTACTCAATCACACAGAAACTCAGAAGGATGAGGGGATGGTTTGGAGACGACGG
2858	ACCACGTCTCACACCGGAAGAAACTGAGAAGCATGAGTTTTAGAGCTAGAAATAGCAAGTTAAAATAAGGCTAGTCCGTTATCAACTTGAAAAACTGGCACCGAGTCGGTGCTTTTTTACTCACCTACCAAGAAACTAAGAAAAATGAGGGCCCCGTTTGGAGACGACGG
2859	ACCACGTCTCACACCGGAAGAAACTGAGAAGCATGAGTTTTAGAGCTAGAAATAGCAAGTTAAAATAAGGCTAGTCCGTTATCAACTTGAAAAACTGGCACCGAGTCGGTGCTTTTTTACTCACGCACCAAGAAACTGACAATCATGATGGAAAGGTTTGGAGACGACGG
2860	ACCACGTCTCACACCGGAAGAAACTGAGAAGCATGAGTTTTAGAGCTAGAAATAGCAAGTTAAAATAAGGCTAGTCCGTTATCAACTTGAAAAACTGGCACCGAGTCGGTGCTTTTTTACTCACTCACCAAGAAACTGACAATCATGTCGGAAGGGTTTGGAGACGACGG
2861	ACCACGTCTCACACCGGAAGAAACTGAGAAGCATGAGTTTTAGAGCTAGAAATAGCAAGTTAAAATAAGGCTAGTCCGTTATCAACTTGAAAAACTGGCACCGAGTCGGTGCTTTTTTACTCAGACACCAAGAAACTGAGCAGAAGGAAGGGAAGGTTTGGAGACGACGG
2862	ACCACGTCTCACACCGGAAGAAACTGAGAAGCATGAGTTTTAGAGCTAGAAATAGCAAGTTAAAATAAGGCTAGTCCGTTATCAACTTGAAAAACTGGCACCGAGTCGGTGCTTTTTTACTCAGCGACCAAGAAACTTACAAGCATGGTGGAAGGGTTTGGAGACGACGG
2863	ACCACGTCTCACACCGGAAGAAACTGAGAAGCATGAGTTTTAGAGCTAGAAATAGCAAGTTAAAATAAGGCTAGTCCGTTATCAACTTGAAAAACTGGCACCGAGTCGGTGCTTTTTTACTCATGCACCAAGAACCTGAGAGGCATGGTGGGAACGTTTGGAGACGACGG
2864	ACCACGTCTCACACCGGAAGAAACTGAGAAGCATGAGTTTTAGAGCTAGAAATAGCAAGTTAAAATAAGGCTAGTCCGTTATCAACTTGAAAAACTGGCACCGAGTCGGTGCTTTTTTACTCATGGACCAAGAAGTTGAGAAGCAGGATGGCCGTGTTTGGAGACGACGG
2865	ACCACGTCTCACACCGGAAGAAACTGAGAAGCATGAGTTTTAGAGCTAGAAATAGCAAGTTAAAATAAGGCTAGTCCGTTATCAACTTGAAAAACTGGCACCGAGTCGGTGCTTTTTTACTCCAACACCAAGACTTTGAGAAGCATGAAGGCATTGTTTGGAGACGACGG
2866	ACCACGTCTCACACCGGAAGAAACTGAGAAGCATGAGTTTTAGAGCTAGAAATAGCAAGTTAAAATAAGGCTAGTCCGTTATCAACTTGAAAAACTGGCACCGAGTCGGTGCTTTTTTACTCCAATACCAATAAAAGGAGAAGCATGAGGGCATTGTTTGGAGACGACGG
2867	ACCACGTCTCACACCGGAAGAAACTGAGAAGCATGAGTTTTAGAGCTAGAAATAGCAAGTTAAAATAAGGCTAGTCCGTTATCAACTTGAAAAACTGGCACCGAGTCGGTGCTTTTTTACTCCAGAACCAGGAAACTGAGAAGCGTCAGGGTCTCGTTTGGAGACGACGG
2868	ACCACGTCTCACACCGGAAGAAACTGAGAAGCATGAGTTTTAGAGCTAGAAATAGCAAGTTAAAATAAGGCTAGTCCGTTATCAACTTGAAAAACTGGCACCGAGTCGGTGCTTTTTTACTCCAGCACCAGGAAACTTAGAAGCATGGTGGAAGGGTTTGGAGACGACGG
2869	ACCACGTCTCACACCGGAAGAAACTGAGAAGCATGAGTTTTAGAGCTAGAAATAGCAAGTTAAAATAAGGCTAGTCCGTTATCAACTTGAAAAACTGGCACCGAGTCGGTGCTTTTTTACTCCATTACCCAGAACCTGAGAAGAATGATGGATTCGTTTGGAGACGACGG
2870	ACCACGTCTCACACCGGAAGAAACTGAGAAGCATGAGTTTTAGAGCTAGAAATAGCAAGTTAAAATAAGGCTAGTCCGTTATCAACTTGAAAAACTGGCACCGAGTCGGTGCTTTTTTACTCCGATACGAAAAAACTGAGAAGCAGTGAGGGCGAGTTTGGAGACGACGG
2871	ACCACGTCTCACACCGGAAGAAACTGAGAAGCATGAGTTTTAGAGCTAGAAATAGCAAGTTAAAATAAGGCTAGTCCGTTATCAACTTGAAAAACTGGCACCGAGTCGGTGCTTTTTTACTCCGGAACGAAAAACCTCAGAAACATGAAGGTGTGGTTTGGAGACGACGG
2872	ACCACGTCTCACACCGGAAGAAACTGAGAAGCATGAGTTTTAGAGCTAGAAATAGCAAGTTAAAATAAGGCTAGTCCGTTATCAACTTGAAAAACTGGCACCGAGTCGGTGCTTTTTTACTCCGTAACGAAAAAGCTCAGAAGCAGGATGGCACAGTTTGGAGACGACGG
2873	ACCACGTCTCACACCGGAAGAAACTGAGAAGCATGAGTTTTAGAGCTAGAAATAGCAAGTTAAAATAAGGCTAGTCCGTTATCAACTTGAAAAACTGGCACCGAGTCGGTGCTTTTTTACTCCGTCACGAAAAATCTGATAAGCATAATGGACACGTTTGGAGACGACGG
2876	ACCACGTCTCACACCGGAAGAAACTGAGAAGCATGAGTTTTAGAGCTAGAAATAGCAAGTTAAAATAAGGCTAGTCCGTTATCAACTTGAAAAACTGGCACCGAGTCGGTGCTTTTTTACTCCTCAACGAAAGAACTGAGATGCATGGTGGAAGTGTTTGGAGACGACGG
2877	ACCACGTCTCACACCGGAAGAAACTGAGAAGCATGAGTTTTAGAGCTAGAAATAGCAAGTTAAAATAAGGCTAGTCCGTTATCAACTTGAAAAACTGGCACCGAGTCGGTGCTTTTTTACTCCTCTACGAAATAACTGAAAAGCAGGAAGGGGGCGTTTGGAGACGACGG
2878	ACCACGTCTCACACCGGAAGAAACTGAGAAGCATGAGTTTTAGAGCTAGAAATAGCAAGTTAAAATAAGGCTAGTCCGTTATCAACTTGAAAAACTGGCACCGAGTCGGTGCTTTTTTACTCCTGAACGAACAAAATGACAAACATGAGGGCTGTGTTTGGAGACGACGG
2879	ACCACGTCTCACACCGGAAGAAACTGAGAAGCATGAGTTTTAGAGCTAGAAATAGCAAGTTAAAATAAGGCTAGTCCGTTATCAACTTGAAAAACTGGCACCGAGTCGGTGCTTTTTTACTCGACAACGAACAATCTGATAAGCAAGAAGGTAATGTTTGGAGACGACGG
2880	ACCACGTCTCACACCGGAAGAAACTGAGAAGCATGAGTTTTAGAGCTAGAAATAGCAAGTTAAAATAAGGCTAGTCCGTTATCAACTTGAAAAACTGGCACCGAGTCGGTGCTTTTTTACTCGACGACGAAGAAAACCAGAAGCAGGAGGGTCAGGTTTGGAGACGACGG
2881	ACCACGTCTCACACCGGAAGAAACTGAGAAGCATGAGTTTTAGAGCTAGAAATAGCAAGTTAAAATAAGGCTAGTCCGTTATCAACTTGAAAAACTGGCACCGAGTCGGTGCTTTTTTACTCGACTACGAAGAAAACCAGCAGCATGAAGGAGAAGTTTGGAGACGACGG
2882	ACCACGTCTCACACCGGAAGAAACTGAGAAGCATGAGTTTTAGAGCTAGAAATAGCAAGTTAAAATAAGGCTAGTCCGTTATCAACTTGAAAAACTGGCACCGAGTCGGTGCTTTTTTACTCGATAACGAAGAAAAGGAGAAGGAGGAAGGAAAGGTTTGGAGACGACGG
2883	ACCACGTCTCACACCGGAAGAAACTGAGAAGCATGAGTTTTAGAGCTAGAAATAGCAAGTTAAAATAAGGCTAGTCCGTTATCAACTTGAAAAACTGGCACCGAGTCGGTGCTTTTTTACTCGCACACGAAGAAAAGGTGAAGCAGGAAGGGGGAGTTTGGAGACGACGG
2884	ACCACGTCTCACACCGGAAGAAACTGAGAAGCATGAGTTTTAGAGCTAGAAATAGCAAGTTAAAATAAGGCTAGTCCGTTATCAACTTGAAAAACTGGCACCGAGTCGGTGCTTTTTTACTCGCCAACGAAGAAAATAATCAGCATGAGGGAGTGGTTTGGAGACGACGG
2885	ACCACGTCTCACACCGGAAGAAACTGAGAAGCATGAGTTTTAGAGCTAGAAATAGCAAGTTAAAATAAGGCTAGTCCGTTATCAACTTGAAAAACTGGCACCGAGTCGGTGCTTTTTTACTCGCGAACGAAGAAAATGAGAAAAATAAAGGTGATGTTTGGAGACGACGG
2886	ACCACGTCTCACACCGGAAGAAACTGAGAAGCATGAGTTTTAGAGCTAGAAATAGCAAGTTAAAATAAGGCTAGTCCGTTATCAACTTGAAAAACTGGCACCGAGTCGGTGCTTTTTTACTCGCGTACGAAGAAAATGAGAAAGATAAAGGTTCTGTTTGGAGACGACGG
2887	ACCACGTCTCACACCGGAAGAAACTGAGAAGCATGAGTTTTAGAGCTAGAAATAGCAAGTTAAAATAAGGCTAGTCCGTTATCAACTTGAAAAACTGGCACCGAGTCGGTGCTTTTTTACTCGCTCACGAAGAAAATGAGAGACATGTGGGGCAAGTTTGGAGACGACGG
2889	ACCACGTCTCACACCGGAAGAAACTGAGAAGCATGAGTTTTAGAGCTAGAAATAGCAAGTTAAAATAAGGCTAGTCCGTTATCAACTTGAAAAACTGGCACCGAGTCGGTGCTTTTTTACTCGTACACGAAGAAACAGGGAAGCTGGAGGGGAAGGTTTGGAGACGACGG
2892	ACCACGTCTCACACCGGAAGAAACTGAGAAGCATGAGTTTTAGAGCTAGAAATAGCAAGTTAAAATAAGGCTAGTCCGTTATCAACTTGAAAAACTGGCACCGAGTCGGTGCTTTTTTACTCGTTCACGAAGAAACTAGGAAGCTTGATGGCAGAGTTTGGAGACGACGG
2893	ACCACGTCTCACACCGGAAGAAACTGAGAAGCATGAGTTTTAGAGCTAGAAATAGCAAGTTAAAATAAGGCTAGTCCGTTATCAACTTGAAAAACTGGCACCGAGTCGGTGCTTTTTTACTCTAACACGAAGAAACTCATAAGCCTGAGGGAGGGGTTTGGAGACGACGG
2894	ACCACGTCTCACACCGGAAGAAACTGAGAAGCATGAGTTTTAGAGCTAGAAATAGCAAGTTAAAATAAGGCTAGTCCGTTATCAACTTGAAAAACTGGCACCGAGTCGGTGCTTTTTTACTCTAATACGAAGAAACTGAAACAAATGAAGGCAAAGTTTGGAGACGACGG
2895	ACCACGTCTCACACCGGAAGAAACTGAGAAGCATGAGTTTTAGAGCTAGAAATAGCAAGTTAAAATAAGGCTAGTCCGTTATCAACTTGAAAAACTGGCACCGAGTCGGTGCTTTTTTACTCTACAACGAAGAAACTGAAACACAGGAAGGGTAAGTTTGGAGACGACGG
2896	ACCACGTCTCACACCGGAAGAAACTGAGAAGCATGAGTTTTAGAGCTAGAAATAGCAAGTTAAAATAAGGCTAGTCCGTTATCAACTTGAAAAACTGGCACCGAGTCGGTGCTTTTTTACTCTACCACGAAGAAACTGAAACTCAGGATGGTTGCGTTTGGAGACGACGG
2897	ACCACGTCTCACACCGGAAGAAACTGAGAAGCATGAGTTTTAGAGCTAGAAATAGCAAGTTAAAATAAGGCTAGTCCGTTATCAACTTGAAAAACTGGCACCGAGTCGGTGCTTTTTTACTCTACGACGAAGAAACTGAAATGCAGAATGGTTCAGTTTGGAGACGACGG
2898	ACCACGTCTCACACCGGAAGAAACTGAGAAGCATGAGTTTTAGAGCTAGAAATAGCAAGTTAAAATAAGGCTAGTCCGTTATCAACTTGAAAAACTGGCACCGAGTCGGTGCTTTTTTACTCTATCACGAAGAAACTGAGAACCAGAAAGGTTAAGTTTGGAGACGACGG
2899	ACCACGTCTCACACCGGAAGAAACTGAGAAGCATGAGTTTTAGAGCTAGAAATAGCAAGTTAAAATAAGGCTAGTCCGTTATCAACTTGAAAAACTGGCACCGAGTCGGTGCTTTTTTACTCTCACACGAAGAAACTGAGAAGGAGATGGGGAGGGTTTGGAGACGACGG
2900	ACCACGTCTCACACCGGAAGAAACTGAGAAGCATGAGTTTTAGAGCTAGAAATAGCAAGTTAAAATAAGGCTAGTCCGTTATCAACTTGAAAAACTGGCACCGAGTCGGTGCTTTTTTACTCTCAGACGAAGAAACTGAGAATCACAGAGGTCAGGTTTGGAGACGACGG
2902	ACCACGTCTCACACCGGAAGAAACTGAGAAGCATGAGTTTTAGAGCTAGAAATAGCAAGTTAAAATAAGGCTAGTCCGTTATCAACTTGAAAAACTGGCACCGAGTCGGTGCTTTTTTACTCTCGAACGAAGAAACTGAGACACAGGTAGGTAAAGTTTGGAGACGACGG
2903	ACCACGTCTCACACCGGAAGAAACTGAGAAGCATGAGTTTTAGAGCTAGAAATAGCAAGTTAAAATAAGGCTAGTCCGTTATCAACTTGAAAAACTGGCACCGAGTCGGTGCTTTTTTACTCTCTCACGAAGAAACTGAGACCCACGGAGGAAAGGTTTGGAGACGACGG
2904	ACCACGTCTCACACCGGAAGAAACTGAGAAGCATGAGTTTTAGAGCTAGAAATAGCAAGTTAAAATAAGGCTAGTCCGTTATCAACTTGAAAAACTGGCACCGAGTCGGTGCTTTTTTACTCTGCCACGAAGAAACTGAGACTCAAGGAGGACAAGTTTGGAGACGACGG
2905	ACCACGTCTCACACCGGAAGAAACTGAGAAGCATGAGTTTTAGAGCTAGAAATAGCAAGTTAAAATAAGGCTAGTCCGTTATCAACTTGAAAAACTGGCACCGAGTCGGTGCTTTTTTACTCTGGAACGAAGAAACTGAGACTCAGAAGGGTAAAGTTTGGAGACGACGG
2906	ACCACGTCTCACACCGGAAGAAACTGAGAAGCATGAGTTTTAGAGCTAGAAATAGCAAGTTAAAATAAGGCTAGTCCGTTATCAACTTGAAAAACTGGCACCGAGTCGGTGCTTTTTTACTCTGTCACGAAGAAACTGAGAGCCAGGGAGGTTAAGTTTGGAGACGACGG
2907	ACCACGTCTCACACCGGAAGAAACTGAGAAGCATGAGTTTTAGAGCTAGAAATAGCAAGTTAAAATAAGGCTAGTCCGTTATCAACTTGAAAAACTGGCACCGAGTCGGTGCTTTTTTACTCTGTGACGAAGAAACTGAGATCCAGAAAGGAGAAGTTTGGAGACGACGG
2908	ACCACGTCTCACACCGGAAGAAACTGAGAAGCATGAGTTTTAGAGCTAGAAATAGCAAGTTAAAATAAGGCTAGTCCGTTATCAACTTGAAAAACTGGCACCGAGTCGGTGCTTTTTTACTCTTACACGAAGAAACTGAGATCCAGGGAGGAAAAGTTTGGAGACGACGG
2910	ACCACGTCTCACACCGGAAGAAACTGAGAAGCATGAGTTTTAGAGCTAGAAATAGCAAGTTAAAATAAGGCTAGTCCGTTATCAACTTGAAAAACTGGCACCGAGTCGGTGCTTTTTTACTGAACCACGAAGAAACTGAGGAACAGGGAGGTTAAGTTTGGAGACGACGG
2911	ACCACGTCTCACACCGGAAGAAACTGAGAAGCATGAGTTTTAGAGCTAGAAATAGCAAGTTAAAATAAGGCTAGTCCGTTATCAACTTGAAAAACTGGCACCGAGTCGGTGCTTTTTTACTGAAGCACGAAGAAACTGAGGACCCAGAGGGGTCTGTTTGGAGACGACGG
2912	ACCACGTCTCACACCGGAAGAAACTGAGAAGCATGAGTTTTAGAGCTAGAAATAGCAAGTTAAAATAAGGCTAGTCCGTTATCAACTTGAAAAACTGGCACCGAGTCGGTGCTTTTTTACTGACACACGAAGAAACTGAGGCCCAAGAGGGTAAGGTTTGGAGACGACGG
2913	ACCACGTCTCACACCGGAAGAAACTGAGAAGCATGAGTTTTAGAGCTAGAAATAGCAAGTTAAAATAAGGCTAGTCCGTTATCAACTTGAAAAACTGGCACCGAGTCGGTGCTTTTTTACTGAGCAACGAAGAAACTGAGGGGCATGGAGGGAAGGTTTGGAGACGACGG
2915	ACCACGTCTCACACCGGAAGAAACTGAGAAGCATGAGTTTTAGAGCTAGAAATAGCAAGTTAAAATAAGGCTAGTCCGTTATCAACTTGAAAAACTGGCACCGAGTCGGTGCTTTTTTACTGAGTAACGAAGAAACTGAGGTGCAAAAAGGTCAAGTTTGGAGACGACGG
2916	ACCACGTCTCACACCGGAAGAAACTGAGAAGCATGAGTTTTAGAGCTAGAAATAGCAAGTTAAAATAAGGCTAGTCCGTTATCAACTTGAAAAACTGGCACCGAGTCGGTGCTTTTTTACTGATATACGAAGAAACTGAGGTTCATGGAGGTTAAGTTTGGAGACGACGG
2917	ACCACGTCTCACACCGGAAGAAACTGAGAAGCATGAGTTTTAGAGCTAGAAATAGCAAGTTAAAATAAGGCTAGTCCGTTATCAACTTGAAAAACTGGCACCGAGTCGGTGCTTTTTTACTGATCGACGAAGAAACTGATAAACACGGGGGCATAGTTTGGAGACGACGG
2918	ACCACGTCTCACACCGGAAGAAACTGAGAAGCATGAGTTTTAGAGCTAGAAATAGCAAGTTAAAATAAGGCTAGTCCGTTATCAACTTGAAAAACTGGCACCGAGTCGGTGCTTTTTTACTGATTCACGAAGAAACTGGGGTGCAGGAAGGTTGTGTTTGGAGACGACGG
2919	ACCACGTCTCACACCGGAAGAAACTGAGAAGCATGAGTTTTAGAGCTAGAAATAGCAAGTTAAAATAAGGCTAGTCCGTTATCAACTTGAAAAACTGGCACCGAGTCGGTGCTTTTTTACTGCAATACGAAGAAACTTAAAATCATGCTGGGATGGTTTGGAGACGACGG
2920	ACCACGTCTCACACCGGAAGAAACTGAGAAGCATGAGTTTTAGAGCTAGAAATAGCAAGTTAAAATAAGGCTAGTCCGTTATCAACTTGAAAAACTGGCACCGAGTCGGTGCTTTTTTACTGCACCACGAAGAAAGAAAGAAGCAAGACGGATTTGTTTGGAGACGACGG
2921	ACCACGTCTCACACCGGAAGAAACTGAGAAGCATGAGTTTTAGAGCTAGAAATAGCAAGTTAAAATAAGGCTAGTCCGTTATCAACTTGAAAAACTGGCACCGAGTCGGTGCTTTTTTACTGCACTACGAAGAAAGAGAGAAGCGGGAGGGAGGTGTTTGGAGACGACGG
2923	ACCACGTCTCACACCGGAAGAAACTGAGAAGCATGAGTTTTAGAGCTAGAAATAGCAAGTTAAAATAAGGCTAGTCCGTTATCAACTTGAAAAACTGGCACCGAGTCGGTGCTTTTTTACTGCATGACGAAGAAAGTGAAAACTATGAGGGAGATGTTTGGAGACGACGG
2924	ACCACGTCTCACACCGGAAGAAACTGAGAAGCATGAGTTTTAGAGCTAGAAATAGCAAGTTAAAATAAGGCTAGTCCGTTATCAACTTGAAAAACTGGCACCGAGTCGGTGCTTTTTTACTGCATTACGAAGAAAGTGAGAATCAGAAAGGTCAAGTTTGGAGACGACGG
2925	ACCACGTCTCACACCGGAAGAAACTGAGAAGCATGAGTTTTAGAGCTAGAAATAGCAAGTTAAAATAAGGCTAGTCCGTTATCAACTTGAAAAACTGGCACCGAGTCGGTGCTTTTTTACTGCCGCACGAAGAAAGTGAGGAGGAAGAAGGCACTGTTTGGAGACGACGG
2926	ACCACGTCTCACACCGGAAGAAACTGAGAAGCATGAGTTTTAGAGCTAGAAATAGCAAGTTAAAATAAGGCTAGTCCGTTATCAACTTGAAAAACTGGCACCGAGTCGGTGCTTTTTTACTGCGATACGAAGAAATTGAGTATAATGATGGAAACGTTTGGAGACGACGG
2927	ACCACGTCTCACACCGGAAGAAACTGAGAAGCATGAGTTTTAGAGCTAGAAATAGCAAGTTAAAATAAGGCTAGTCCGTTATCAACTTGAAAAACTGGCACCGAGTCGGTGCTTTTTTACTGCGCAACGAAGAAATTGTTAAGCATAAAGGAACCGTTTGGAGACGACGG
2928	ACCACGTCTCACACCGGAAGAAACTGAGAAGCATGAGTTTTAGAGCTAGAAATAGCAAGTTAAAATAAGGCTAGTCCGTTATCAACTTGAAAAACTGGCACCGAGTCGGTGCTTTTTTACTGCGGAACGAAGAACTTGAGAAGAATGTGGGTATTGTTTGGAGACGACGG
2929	ACCACGTCTCACACCGGAAGAAACTGAGAAGCATGAGTTTTAGAGCTAGAAATAGCAAGTTAAAATAAGGCTAGTCCGTTATCAACTTGAAAAACTGGCACCGAGTCGGTGCTTTTTTACTGCGGCACGAAGAACTTGATAAGCAAGAAGGTAATGTTTGGAGACGACGG
2931	ACCACGTCTCACACCGGAAGAAACTGAGAAGCATGAGTTTTAGAGCTAGAAATAGCAAGTTAAAATAAGGCTAGTCCGTTATCAACTTGAAAAACTGGCACCGAGTCGGTGCTTTTTTACTGCTAGACGAAGAAGCTGAAGAGCATGGAGGCCGAGTTTGGAGACGACGG
2932	ACCACGTCTCACACCGGAAGAAACTGAGAAGCATGAGTTTTAGAGCTAGAAATAGCAAGTTAAAATAAGGCTAGTCCGTTATCAACTTGAAAAACTGGCACCGAGTCGGTGCTTTTTTACTGCTATACGAAGAAGCTGAGAAGGCAGAGGGGAGGGTTTGGAGACGACGG
2933	ACCACGTCTCACACCGGAAGAAACTGAGAAGCATGAGTTTTAGAGCTAGAAATAGCAAGTTAAAATAAGGCTAGTCCGTTATCAACTTGAAAAACTGGCACCGAGTCGGTGCTTTTTTACTGCTGCACGAAGAAGCTGGGAAGCAGGTGGGGTCTGTTTGGAGACGACGG
2934	ACCACGTCTCACACCGGAAGAAACTGAGAAGCATGAGTTTTAGAGCTAGAAATAGCAAGTTAAAATAAGGCTAGTCCGTTATCAACTTGAAAAACTGGCACCGAGTCGGTGCTTTTTTACTGGAGCACGAAGAATCCGAGAAGTCTGATGGTGACGTTTGGAGACGACGG
2935	ACCACGTCTCACACCGGAAGAAACTGAGAAGCATGAGTTTTAGAGCTAGAAATAGCAAGTTAAAATAAGGCTAGTCCGTTATCAACTTGAAAAACTGGCACCGAGTCGGTGCTTTTTTACTGGATCACGAAGAATCTGAGAAGCTGTAAGGCTTTGTTTGGAGACGACGG
2936	ACCACGTCTCACACCGGAAGAAACTGAGAAGCATGAGTTTTAGAGCTAGAAATAGCAAGTTAAAATAAGGCTAGTCCGTTATCAACTTGAAAAACTGGCACCGAGTCGGTGCTTTTTTACTGGCAGACGAAGACACAGAGGAACATGAAGGTATTGTTTGGAGACGACGG
2937	ACCACGTCTCACACCGGAAGAAACTGAGAAGCATGAGTTTTAGAGCTAGAAATAGCAAGTTAAAATAAGGCTAGTCCGTTATCAACTTGAAAAACTGGCACCGAGTCGGTGCTTTTTTACTGGCATACGAAGACACAGAGGGGCATGAAGGGGGAGTTTGGAGACGACGG
2938	ACCACGTCTCACACCGGAAGAAACTGAGAAGCATGAGTTTTAGAGCTAGAAATAGCAAGTTAAAATAAGGCTAGTCCGTTATCAACTTGAAAAACTGGCACCGAGTCGGTGCTTTTTTACTGTGGAACGAAGACACTGAGCAGCAGCATGGCCTGGTTTGGAGACGACGG
2939	ACCACGTCTCACACCGGAAGAAACTGAGAAGCATGAGTTTTAGAGCTAGAAATAGCAAGTTAAAATAAGGCTAGTCCGTTATCAACTTGAAAAACTGGCACCGAGTCGGTGCTTTTTTACTGTGGTACGAAGACCCTGAGAACCATGCTGGGACTGTTTGGAGACGACGG
2940	ACCACGTCTCACACCGGAAGAAACTGAGAAGCATGAGTTTTAGAGCTAGAAATAGCAAGTTAAAATAAGGCTAGTCCGTTATCAACTTGAAAAACTGGCACCGAGTCGGTGCTTTTTTACTGTGTAACGAAGACCCTGAGAAGCAACAAGGACCTGTTTGGAGACGACGG
2941	ACCACGTCTCACACCGGAAGAAACTGAGAAGCATGAGTTTTAGAGCTAGAAATAGCAAGTTAAAATAAGGCTAGTCCGTTATCAACTTGAAAAACTGGCACCGAGTCGGTGCTTTTTTACTGTGTCACGAAGACTCTGAGAAGTTTGAGGGAGAAGTTTGGAGACGACGG
2942	ACCACGTCTCACACCGGAAGAAACTGAGAAGCATGAGTTTTAGAGCTAGAAATAGCAAGTTAAAATAAGGCTAGTCCGTTATCAACTTGAAAAACTGGCACCGAGTCGGTGCTTTTTTACTGTTACACGAAGAGAATGAGAGGCAAGAAGGAAAGGTTTGGAGACGACGG
2943	ACCACGTCTCACACCGGAAGAAACTGAGAAGCATGAGTTTTAGAGCTAGAAATAGCAAGTTAAAATAAGGCTAGTCCGTTATCAACTTGAAAAACTGGCACCGAGTCGGTGCTTTTTTACTGTTCAACGAAGAGATTCAGAAGAATGATGGTTAGGTTTGGAGACGACGG
2944	ACCACGTCTCACACCGGAAGAAACTGAGAAGCATGAGTTTTAGAGCTAGAAATAGCAAGTTAAAATAAGGCTAGTCCGTTATCAACTTGAAAAACTGGCACCGAGTCGGTGCTTTTTTACTTAAGAACGAAGATTCTGAGAAACCTGATGGAATTGTTTGGAGACGACGG
2946	ACCACGTCTCACACCGGAAGAAACTGAGAAGCATGAGTTTTAGAGCTAGAAATAGCAAGTTAAAATAAGGCTAGTCCGTTATCAACTTGAAAAACTGGCACCGAGTCGGTGCTTTTTTACTTACGAACGAAGGAATTCAGAAGCATCAAGGTGAGGTTTGGAGACGACGG
2948	ACCACGTCTCACACCGGAAGAAACTGAGAAGCATGAGTTTTAGAGCTAGAAATAGCAAGTTAAAATAAGGCTAGTCCGTTATCAACTTGAAAAACTGGCACCGAGTCGGTGCTTTTTTACTTACTGACGAAGGATCTGAGAACCAGGAGGGTAACGTTTGGAGACGACGG
2950	ACCACGTCTCACACCGGAAGAAACTGAGAAGCATGAGTTTTAGAGCTAGAAATAGCAAGTTAAAATAAGGCTAGTCCGTTATCAACTTGAAAAACTGGCACCGAGTCGGTGCTTTTTTACTTAGGAACGAAGTATCTTAGAAACATGAAGGAAATGTTTGGAGACGACGG
2951	ACCACGTCTCACACCGGAAGAAACTGAGAAGCATGAGTTTTAGAGCTAGAAATAGCAAGTTAAAATAAGGCTAGTCCGTTATCAACTTGAAAAACTGGCACCGAGTCGGTGCTTTTTTACTTAGTCACGAATAAACTCAGAAGCAAGAAGGTGTCGTTTGGAGACGACGG
2952	ACCACGTCTCACACCGGAAGAAACTGAGAAGCATGAGTTTTAGAGCTAGAAATAGCAAGTTAAAATAAGGCTAGTCCGTTATCAACTTGAAAAACTGGCACCGAGTCGGTGCTTTTTTACTTATGAACGAGAAAACTGAGACTCATGAGGGTCACGTTTGGAGACGACGG
2953	ACCACGTCTCACACCGGAAGAAACTGAGAAGCATGAGTTTTAGAGCTAGAAATAGCAAGTTAAAATAAGGCTAGTCCGTTATCAACTTGAAAAACTGGCACCGAGTCGGTGCTTTTTTACTTCACAACGAGGAAACTGAGAAGGAGGGAGGTTAGGTTTGGAGACGACGG
2954	ACCACGTCTCACACCGGAAGAAACTGAGAAGCATGAGTTTTAGAGCTAGAAATAGCAAGTTAAAATAAGGCTAGTCCGTTATCAACTTGAAAAACTGGCACCGAGTCGGTGCTTTTTTACTTCAGAACGAGGAAACTGAGACTCAGGAAGGTGTCGTTTGGAGACGACGG
2955	ACCACGTCTCACACCGGAAGAAACTGAGAAGCATGAGTTTTAGAGCTAGAAATAGCAAGTTAAAATAAGGCTAGTCCGTTATCAACTTGAAAAACTGGCACCGAGTCGGTGCTTTTTTACTTCAGCACGAGGAAACTGAGACTCAGGAGGGGAAGGTTTGGAGACGACGG
2956	ACCACGTCTCACACCGGAAGAAACTGAGAAGCATGAGTTTTAGAGCTAGAAATAGCAAGTTAAAATAAGGCTAGTCCGTTATCAACTTGAAAAACTGGCACCGAGTCGGTGCTTTTTTACTTCAGGACGAGGAAACTGAGACTCATGATGGCAAAGTTTGGAGACGACGG
2957	ACCACGTCTCACACCGGAAGAAACTGAGAAGCATGAGTTTTAGAGCTAGAAATAGCAAGTTAAAATAAGGCTAGTCCGTTATCAACTTGAAAAACTGGCACCGAGTCGGTGCTTTTTTACTTCAGTACGAGGAAACTGAGAGACATGAGGGCTAAGTTTGGAGACGACGG
2958	ACCACGTCTCACACCGGAAGAAACTGAGAAGCATGAGTTTTAGAGCTAGAAATAGCAAGTTAAAATAAGGCTAGTCCGTTATCAACTTGAAAAACTGGCACCGAGTCGGTGCTTTTTTACTTCATCACGAGGAAACTGAGATGCATAGAGGTTAAGTTTGGAGACGACGG
2959	ACCACGTCTCACACCGGAAGAAACTGAGAAGCATGAGTTTTAGAGCTAGAAATAGCAAGTTAAAATAAGGCTAGTCCGTTATCAACTTGAAAAACTGGCACCGAGTCGGTGCTTTTTTACTTCCATACGAGGAAACTGAGATTCAAGATGGCTGAGTTTGGAGACGACGG
2960	ACCACGTCTCACACCGGAAGAAACTGAGAAGCATGAGTTTTAGAGCTAGAAATAGCAAGTTAAAATAAGGCTAGTCCGTTATCAACTTGAAAAACTGGCACCGAGTCGGTGCTTTTTTACTTCCTTACGAGGAAACTGAGGTGCAAGAGGGGACGGTTTGGAGACGACGG
2961	ACCACGTCTCACACCGGAAGAAACTGAGAAGCATGAGTTTTAGAGCTAGAAATAGCAAGTTAAAATAAGGCTAGTCCGTTATCAACTTGAAAAACTGGCACCGAGTCGGTGCTTTTTTACTTCGCCACGAGGAAACTTAAAAGCATGGAGGTAAGGTTTGGAGACGACGG
2962	ACCACGTCTCACACCGGAAGAAACTGAGAAGCATGAGTTTTAGAGCTAGAAATAGCAAGTTAAAATAAGGCTAGTCCGTTATCAACTTGAAAAACTGGCACCGAGTCGGTGCTTTTTTACTTCGGAACGAGGAAACTTAGAAACAGGATGGCCAGGTTTGGAGACGACGG
2963	ACCACGTCTCACACCGGAAGAAACTGAGAAGCATGAGTTTTAGAGCTAGAAATAGCAAGTTAAAATAAGGCTAGTCCGTTATCAACTTGAAAAACTGGCACCGAGTCGGTGCTTTTTTACTTCGTCACGAGGAAATTGAGAATCAAGAAGGTTAAGTTTGGAGACGACGG
2964	ACCACGTCTCACACCGGAAGAAACTGAGAAGCATGAGTTTTAGAGCTAGAAATAGCAAGTTAAAATAAGGCTAGTCCGTTATCAACTTGAAAAACTGGCACCGAGTCGGTGCTTTTTTACTTCGTGACGAGGAAGCTGAGATGCAGGAAGGTGAAGTTTGGAGACGACGG
2965	ACCACGTCTCACACCGGAAGAAACTGAGAAGCATGAGTTTTAGAGCTAGAAATAGCAAGTTAAAATAAGGCTAGTCCGTTATCAACTTGAAAAACTGGCACCGAGTCGGTGCTTTTTTACTTCTATACGAGGACACAGAGAAGCAGGAGGGAGGGGTTTGGAGACGACGG
2966	ACCACGTCTCACACCGGAAGAAACTGAGAAGCATGAGTTTTAGAGCTAGAAATAGCAAGTTAAAATAAGGCTAGTCCGTTATCAACTTGAAAAACTGGCACCGAGTCGGTGCTTTTTTACTTCTCGACGAGGACACTGAGTAGAATGAAGGAGAGGTTTGGAGACGACGG
2968	ACCACGTCTCACACCGGAAGAAACTGAGAAGCATGAGTTTTAGAGCTAGAAATAGCAAGTTAAAATAAGGCTAGTCCGTTATCAACTTGAAAAACTGGCACCGAGTCGGTGCTTTTTTACTTCTTAACGAGGAGACTGAGGAGCAGGATGGCGGCGTTTGGAGACGACGG
2969	ACCACGTCTCACACCGGAAGAAACTGAGAAGCATGAGTTTTAGAGCTAGAAATAGCAAGTTAAAATAAGGCTAGTCCGTTATCAACTTGAAAAACTGGCACCGAGTCGGTGCTTTTTTACTTGACAACGATGAACCTCAGAAGCATGAAGGTGAAGTTTGGAGACGACGG
2970	ACCACGTCTCACACCGGAAGAAACTGAGAAGCATGAGTTTTAGAGCTAGAAATAGCAAGTTAAAATAAGGCTAGTCCGTTATCAACTTGAAAAACTGGCACCGAGTCGGTGCTTTTTTACTTGACTACGATGAAGCTGAGATGCAGGAAGGCTAAGTTTGGAGACGACGG
2971	ACCACGTCTCACACCGGAAGAAACTGAGAAGCATGAGTTTTAGAGCTAGAAATAGCAAGTTAAAATAAGGCTAGTCCGTTATCAACTTGAAAAACTGGCACCGAGTCGGTGCTTTTTTACTTGATCACGATGATACAGAAAAGCATGAAGGTTAGGTTTGGAGACGACGG
2972	ACCACGTCTCACACCGGAAGAAACTGAGAAGCATGAGTTTTAGAGCTAGAAATAGCAAGTTAAAATAAGGCTAGTCCGTTATCAACTTGAAAAACTGGCACCGAGTCGGTGCTTTTTTACTTGCAGACGATGTGACTGACAAGCATGATGGGTGGGTTTGGAGACGACGG
2973	ACCACGTCTCACACCGGAAGAAACTGAGAAGCATGAGTTTTAGAGCTAGAAATAGCAAGTTAAAATAAGGCTAGTCCGTTATCAACTTGAAAAACTGGCACCGAGTCGGTGCTTTTTTACTTGCGAACGCAGAAACAGGGAAGCCTGAAGGAAGTGTTTGGAGACGACGG
2974	ACCACGTCTCACACCGGAAGAAACTGAGAAGCATGAGTTTTAGAGCTAGAAATAGCAAGTTAAAATAAGGCTAGTCCGTTATCAACTTGAAAAACTGGCACCGAGTCGGTGCTTTTTTACTTGCGGACGCAGAAACTGACAAGCAGGTTGGGAAAGTTTGGAGACGACGG
2975	ACCACGTCTCACACCGGAAGAAACTGAGAAGCATGAGTTTTAGAGCTAGAAATAGCAAGTTAAAATAAGGCTAGTCCGTTATCAACTTGAAAAACTGGCACCGAGTCGGTGCTTTTTTACTTGCTAACGCAGAAACTGAGATGCAGAAAGGTGAAGTTTGGAGACGACGG
2976	ACCACGTCTCACACCGGAAGAAACTGAGAAGCATGAGTTTTAGAGCTAGAAATAGCAAGTTAAAATAAGGCTAGTCCGTTATCAACTTGAAAAACTGGCACCGAGTCGGTGCTTTTTTACTTGCTTACGCAGAAAGTGGGAATCATGATGGAGCAGTTTGGAGACGACGG
2978	ACCACGTCTCACACCGGAAGAAACTGAGAAGCATGAGTTTTAGAGCTAGAAATAGCAAGTTAAAATAAGGCTAGTCCGTTATCAACTTGAAAAACTGGCACCGAGTCGGTGCTTTTTTACTTGTACACGGAGAAACCGAAAAGCATTATGGTCACGTTTGGAGACGACGG
2979	ACCACGTCTCACACCGGAAGAAACTGAGAAGCATGAGTTTTAGAGCTAGAAATAGCAAGTTAAAATAAGGCTAGTCCGTTATCAACTTGAAAAACTGGCACCGAGTCGGTGCTTTTTTACTTGTAGACGGAGAAACTAAGAAGCAACATGGGATTGTTTGGAGACGACGG
2980	ACCACGTCTCACACCGGAAGAAACTGAGAAGCATGAGTTTTAGAGCTAGAAATAGCAAGTTAAAATAAGGCTAGTCCGTTATCAACTTGAAAAACTGGCACCGAGTCGGTGCTTTTTTACTTGTCCACGGAGAAACTGAGAAGCTAAAAGGAAGAGTTTGGAGACGACGG
2981	ACCACGTCTCACACCGGAAGAAACTGAGAAGCATGAGTTTTAGAGCTAGAAATAGCAAGTTAAAATAAGGCTAGTCCGTTATCAACTTGAAAAACTGGCACCGAGTCGGTGCTTTTTTACTTGTCTACGGAGAAACTGAGAATTAGGAGGGAAAAGTTTGGAGACGACGG
2983	ACCACGTCTCACACCGGAAGAAACTGAGAAGCATGAGTTTTAGAGCTAGAAATAGCAAGTTAAAATAAGGCTAGTCCGTTATCAACTTGAAAAACTGGCACCGAGTCGGTGCTTTTTTACTTGTTAACGGAGAAAGTGATAAACATGAAGGTGGGGTTTGGAGACGACGG
2984	ACCACGTCTCACACCGGAAGAAACTGAGAAGCATGAGTTTTAGAGCTAGAAATAGCAAGTTAAAATAAGGCTAGTCCGTTATCAACTTGAAAAACTGGCACCGAGTCGGTGCTTTTTTAGAACACAACGGAGAGACAGAGAAGCAGGAGGGTGAGGTTTGGAGACGACGG
2985	ACCACGTCTCACACCGGAAGAAACTGAGAAGCATGAGTTTTAGAGCTAGAAATAGCAAGTTAAAATAAGGCTAGTCCGTTATCAACTTGAAAAACTGGCACCGAGTCGGTGCTTTTTTAGAACACGACGGAGAGACAGAGAAGCATGAAGGCAAAGTTTGGAGACGACGG
2986	ACCACGTCTCACACCGGAAGAAACTGAGAAGCATGAGTTTTAGAGCTAGAAATAGCAAGTTAAAATAAGGCTAGTCCGTTATCAACTTGAAAAACTGGCACCGAGTCGGTGCTTTTTTAGAACATGACGGATAAAGTGAGAAGCACGATGGGAAGGTTTGGAGACGACGG
2987	ACCACGTCTCACACCGGAAGAAACTGAGAAGCATGAGTTTTAGAGCTAGAAATAGCAAGTTAAAATAAGGCTAGTCCGTTATCAACTTGAAAAACTGGCACCGAGTCGGTGCTTTTTTAGAACCAGACGGGGAAACTGAGATGCAGGAAGGTTTTGTTTGGAGACGACGG
2988	ACCACGTCTCACACCGGAAGAAACTGAGAAGCATGAGTTTTAGAGCTAGAAATAGCAAGTTAAAATAAGGCTAGTCCGTTATCAACTTGAAAAACTGGCACCGAGTCGGTGCTTTTTTAGAACCTGACGTAGAAACTGAGAAGTAGGTGGGGGTGGTTTGGAGACGACGG
2989	ACCACGTCTCACACCGGAAGAAACTGAGAAGCATGAGTTTTAGAGCTAGAAATAGCAAGTTAAAATAAGGCTAGTCCGTTATCAACTTGAAAAACTGGCACCGAGTCGGTGCTTTTTTAGAACGATACGTAGAAGCTGAGAAGCAGGGAGGTAAAGTTTGGAGACGACGG
2990	ACCACGTCTCACACCGGAAGAAACTGAGAAGCATGAGTTTTAGAGCTAGAAATAGCAAGTTAAAATAAGGCTAGTCCGTTATCAACTTGAAAAACTGGCACCGAGTCGGTGCTTTTTTAGAACGGAACGTAGATAATGAGAAGCATTATGGAGGAGTTTGGAGACGACGG
2991	ACCACGTCTCACACCGGAAGAAACTGAGAAGCATGAGTTTTAGAGCTAGAAATAGCAAGTTAAAATAAGGCTAGTCCGTTATCAACTTGAAAAACTGGCACCGAGTCGGTGCTTTTTTAGAACGGTACGTAGGAATTGAGAAACATGAAGGGGGCGTTTGGAGACGACGG
2992	ACCACGTCTCACACCGGAAGAAACTGAGAAGCATGAGTTTTAGAGCTAGAAATAGCAAGTTAAAATAAGGCTAGTCCGTTATCAACTTGAAAAACTGGCACCGAGTCGGTGCTTTTTTAGAACGTCACGTTGAGACTGAGAAACATGAAGGACTAGTTTGGAGACGACGG
2993	ACCACGTCTCACACCGGAAGAAACTGAGAAGCATGAGTTTTAGAGCTAGAAATAGCAAGTTAAAATAAGGCTAGTCCGTTATCAACTTGAAAAACTGGCACCGAGTCGGTGCTTTTTTAGAACGTTACTAAGAAACTCAGAAGCAATAGGGGAACGTTTGGAGACGACGG
2994	ACCACGTCTCACACCGGAAGAAACTGAGAAGCATGAGTTTTAGAGCTAGAAATAGCAAGTTAAAATAAGGCTAGTCCGTTATCAACTTGAAAAACTGGCACCGAGTCGGTGCTTTTTTAGAACTATACTAAGAACCTTAGAAGCATTAAGGTTCAGTTTGGAGACGACGG
2996	ACCACGTCTCACACCGGAAGAAACTGAGAAGCATGAGTTTTAGAGCTAGAAATAGCAAGTTAAAATAAGGCTAGTCCGTTATCAACTTGAAAAACTGGCACCGAGTCGGTGCTTTTTTAGAACTCTACTAAGAATCTGAAAAGAATGATGGTAATGTTTGGAGACGACGG
2997	ACCACGTCTCACACCGGAAGAAACTGAGAAGCATGAGTTTTAGAGCTAGAAATAGCAAGTTAAAATAAGGCTAGTCCGTTATCAACTTGAAAAACTGGCACCGAGTCGGTGCTTTTTTAGAACTGCACTAAGAATCTGAGAATAATGAAGGCACTGTTTGGAGACGACGG
2999	ACCACGTCTCACACCGGAAGAAACTGAGAAGCATGAGTTTTAGAGCTAGAAATAGCAAGTTAAAATAAGGCTAGTCCGTTATCAACTTGAAAAACTGGCACCGAGTCGGTGCTTTTTTAGAACTGTACTAAGAGACTGAGAGACATGAGGGGGCAGTTTGGAGACGACGG
3000	ACCACGTCTCACACCGGAAGAAACTGAGAAGCATGAGTTTTAGAGCTAGAAATAGCAAGTTAAAATAAGGCTAGTCCGTTATCAACTTGAAAAACTGGCACCGAGTCGGTGCTTTTTTAGAAGAACACTAGGAAACTGAGACTCATGATGGTGAAGTTTGGAGACGACGG
3002	ACCACGTCTCACACCGGAAGAAACTGAGAAGCATGAGTTTTAGAGCTAGAAATAGCAAGTTAAAATAAGGCTAGTCCGTTATCAACTTGAAAAACTGGCACCGAGTCGGTGCTTTTTTAGAAGAGAACTTAGACACTGAGAAGCAGGAGGGCTGGGTTTGGAGACGACGG
3004	ACCACGTCTCACACCGGCTTCTACCCCAATGACTTGGTTTTAGAGCTAGAAATAGCAAGTTAAAATAAGGCTAGTCCGTTATCAACTTGAAAAACTGGCACCGAGTCGGTGCTTTTTTAGAAGATCACACCTCTACCCCAATAACTTATGGAAAAGTTTGGAGACGACGG
3005	ACCACGTCTCACACCGGCTTCTACCCCAATGACTTGGTTTTAGAGCTAGAAATAGCAAGTTAAAATAAGGCTAGTCCGTTATCAACTTGAAAAACTGGCACCGAGTCGGTGCTTTTTTAGAAGCATACACCTGTACCCCAATAACTTGTGGGAAAGTTTGGAGACGACGG
3012	ACCACGTCTCACACCGGCTTCTACCCCAATGACTTGGTTTTAGAGCTAGAAATAGCAAGTTAAAATAAGGCTAGTCCGTTATCAACTTGAAAAACTGGCACCGAGTCGGTGCTTTTTTAGAAGGACACACCTGTACCCCAATGACTTATGGGGAAGTTTGGAGACGACGG
3014	ACCACGTCTCACACCGGCTTCTACCCCAATGACTTGGTTTTAGAGCTAGAAATAGCAAGTTAAAATAAGGCTAGTCCGTTATCAACTTGAAAAACTGGCACCGAGTCGGTGCTTTTTTAGAAGGTCACACTTGTACCCCAATAACTTAAGGAAAAGTTTGGAGACGACGG
3015	ACCACGTCTCACACCGGCTTCTACCCCAATGACTTGGTTTTAGAGCTAGAAATAGCAAGTTAAAATAAGGCTAGTCCGTTATCAACTTGAAAAACTGGCACCGAGTCGGTGCTTTTTTAGAAGTACACACTTGTACCCCAATAACTTACGGAAAAGTTTGGAGACGACGG
3017	ACCACGTCTCACACCGGCTTCTACCCCAATGACTTGGTTTTAGAGCTAGAAATAGCAAGTTAAAATAAGGCTAGTCCGTTATCAACTTGAAAAACTGGCACCGAGTCGGTGCTTTTTTAGAAGTCAACACTTGTACCCCAATAACTTATGGGAAAGTTTGGAGACGACGG
3020	ACCACGTCTCACACCGGCTTCTACCCCAATGACTTGGTTTTAGAGCTAGAAATAGCAAGTTAAAATAAGGCTAGTCCGTTATCAACTTGAAAAACTGGCACCGAGTCGGTGCTTTTTTAGAATACAACGATTCTGCCCCAATCACATGTGGAACTGTTTGGAGACGACGG
3021	ACCACGTCTCACACCGGCTTCTACCCCAATGACTTGGTTTTAGAGCTAGAAATAGCAAGTTAAAATAAGGCTAGTCCGTTATCAACTTGAAAAACTGGCACCGAGTCGGTGCTTTTTTAGAATCATACGCCTGTACCCCAATAACTTATGGGAAAGTTTGGAGACGACGG
3023	ACCACGTCTCACACCGGCTTCTACCCCAATGACTTGGTTTTAGAGCTAGAAATAGCAAGTTAAAATAAGGCTAGTCCGTTATCAACTTGAAAAACTGGCACCGAGTCGGTGCTTTTTTAGACAATTACACCTATACCCCAATAACTTGTGGAAAAGTTTGGAGACGACGG
3051	ACCACGTCTCACACCGGCTTCTACCCCAATGACTTGGTTTTAGAGCTAGAAATAGCAAGTTAAAATAAGGCTAGTCCGTTATCAACTTGAAAAACTGGCACCGAGTCGGTGCTTTTTTAGAAGAGCACAATACTACCTCAATGACTTGAGGGCACGTTTGGAGACGACGG
3052	ACCACGTCTCACACCGGCTTCTACCCCAATGACTTGGTTTTAGAGCTAGAAATAGCAAGTTAAAATAAGGCTAGTCCGTTATCAACTTGAAAAACTGGCACCGAGTCGGTGCTTTTTTAGAAGGTAACACTTGTACCCCAATAACCTGTGGGATAGTTTGGAGACGACGG
3053	ACCACGTCTCACACCGGCTTCTACCCCAATGACTTGGTTTTAGAGCTAGAAATAGCAAGTTAAAATAAGGCTAGTCCGTTATCAACTTGAAAAACTGGCACCGAGTCGGTGCTTTTTTAGAAGTGTACCCCTCAACCACAATGACTTGAGGAACTGTTTGGAGACGACGG
3054	ACCACGTCTCACACCGGCTTCTACCCCAATGACTTGGTTTTAGAGCTAGAAATAGCAAGTTAAAATAAGGCTAGTCCGTTATCAACTTGAAAAACTGGCACCGAGTCGGTGCTTTTTTAGAATACTACGCCTCTACCCCACTGCCTTGTGGGGCAGTTTGGAGACGACGG
3055	ACCACGTCTCACACCGGCTTCTACCCCAATGACTTGGTTTTAGAGCTAGAAATAGCAAGTTAAAATAAGGCTAGTCCGTTATCAACTTGAAAAACTGGCACCGAGTCGGTGCTTTTTTAGAATAGCACGCCTCTACCCCACTGGCTGGTGGTCCAGTTTGGAGACGACGG
3056	ACCACGTCTCACACCGGCTTCTACCCCAATGACTTGGTTTTAGAGCTAGAAATAGCAAGTTAAAATAAGGCTAGTCCGTTATCAACTTGAAAAACTGGCACCGAGTCGGTGCTTTTTTAGAATATCACGCCTGTACCCCAATAACTTAAGGGAAAGTTTGGAGACGACGG
3058	ACCACGTCTCACACCGGCTTCTACCCCAATGACTTGGTTTTAGAGCTAGAAATAGCAAGTTAAAATAAGGCTAGTCCGTTATCAACTTGAAAAACTGGCACCGAGTCGGTGCTTTTTTAGAATCGTACGCTGCTACCACAATGACTAACGGTCAGGTTTGGAGACGACGG
3059	ACCACGTCTCACACCGGCTTCTACCCCAATGACTTGGTTTTAGAGCTAGAAATAGCAAGTTAAAATAAGGCTAGTCCGTTATCAACTTGAAAAACTGGCACCGAGTCGGTGCTTTTTTAGAATCTAACGCTTCAACCCTAATGAGTAGTGGATACGTTTGGAGACGACGG
3060	ACCACGTCTCACACCGGCTTCTACCCCAATGACTTGGTTTTAGAGCTAGAAATAGCAAGTTAAAATAAGGCTAGTCCGTTATCAACTTGAAAAACTGGCACCGAGTCGGTGCTTTTTTAGAATCTCACGCTTCTAACCCCATGACTTTGGGAGGCGTTTGGAGACGACGG
3061	ACCACGTCTCACACCGGCTTCTACCCCAATGACTTGGTTTTAGAGCTAGAAATAGCAAGTTAAAATAAGGCTAGTCCGTTATCAACTTGAAAAACTGGCACCGAGTCGGTGCTTTTTTAGAATGACACGCTTCTAATCCAGTGGCTTGTGGTCCTGTTTGGAGACGACGG
3062	ACCACGTCTCACACCGGCTTCTACCCCAATGACTTGGTTTTAGAGCTAGAAATAGCAAGTTAAAATAAGGCTAGTCCGTTATCAACTTGAAAAACTGGCACCGAGTCGGTGCTTTTTTAGAATGGTACGCTTCTCCCCCATTAACTAGTGGTGTGGTTTGGAGACGACGG
3063	ACCACGTCTCACACCGGCTTCTACCCCAATGACTTGGTTTTAGAGCTAGAAATAGCAAGTTAAAATAAGGCTAGTCCGTTATCAACTTGAAAAACTGGCACCGAGTCGGTGCTTTTTTAGAATGTAACGCTTCTGTCCCAGTGAGTTGGGGTGTGGTTTGGAGACGACGG
[truncated: 6,151 more rows]

## Sheet: Data3.3 LibB  SURRO-seqOFF data
# S3.3 SURRO-seqOFF data of LibB. Results presented here are filtering low quality sites, including sites with NGS reads less than 32 in either SpCas9 or MOCK, and sites with indel reads (synthetic indels) higher than 4% in MOCK.)
SURROID	RGN spacer sequences	Protospacer sequences	Total reads (spcas9)	Indel reads (spcas9)	IF% (SpCas9)	Total reads (MOCK)	Indel reads (MOCK)	IF% (MOCK)	p.value (Fisher)	p.adjust (BH)	FC	sig (FC>2, p.adj < 0.05)
1	GGAGTCACATGGGAGTCACA	AGAATCACAGGGGAGGCACAGGG	3988	1131	28.3601	3187	11	0.345152	1.66018e-302	7.93197e-301	82.1669	Sig.		0.193991	0.302054
4	GGAGTCACATGGGAGTCACA	GGAGGCACACGGGCCTCACAGGG	6684	6	0.0897666	4630	4	0.0863931	1	1	1.03905	NS
6	GGAGTCACATGGGAGTCACA	GGAGGGACATGGAGGTCACAGGG	1457	1	0.0686342	2649	9	0.339751	0.108933	0.261759	0.202013	NS
7	GGAGTCACATGGGAGTCACA	GGATTCACTTGGGAGCCACTTGG	17364	27	0.155494	15654	34	0.217197	0.201472	0.417456	0.715913	NS
8	GGAGTCACATGGGAGTCACA	GGAGACACAGGTGAGTCACCGGG	32880	24	0.0729927	29237	34	0.116291	0.0872276	0.219682	0.627673	NS
15	GGAGTCACATGGGAGTCACA	AGAGCCACATGGGAACCACATGG	11225	1144	10.1915	9264	33	0.356218	5.29489e-258	2.39001e-256	28.6104	Sig.
17	GGAGTCACATGGGAGTCACA	GAAGTCACATGGGGGTCCCACGG	14789	119	0.804652	16571	162	0.977611	0.105539	0.256167	0.82308	NS
18	GGAGTCACATGGGAGTCACA	GCAGTCACATGGAAGCCAGAAGG	3442	13	0.377687	2547	30	1.17786	0.000493492	0.0022399	0.320657	NS
19	GGAGTCACATGGGAGTCACA	GCAGTCTCATGGGACTCAGATGG	15855	14	0.0883002	14777	18	0.121811	0.381826	0.65605	0.724896	NS
20	GGAGTCACATGGGAGTCACA	GGAGACACAGAGAAGTCACAAGG	5546	3	0.054093	4797	8	0.166771	0.12732	0.295177	0.324355	NS
21	GGAGTCACATGGGAGTCACA	GGAGACACATGGAAATCTCATGG	21411	106	0.495073	18146	28	0.154304	2.70918e-09	2.38e-08	3.20842	Sig.
22	GGAGTCACATGGGAGTCACA	GGAGACACATGGGAATCAATAGG	25536	23	0.0900689	22430	52	0.231832	0.000104833	0.000524806	0.388509	NS
23	GGAGTCACATGGGAGTCACA	GGAGACACATGGGAGTGAGCCGG	2783	5	0.179662	3413	5	0.146499	0.761062	1	1.22637	NS
24	GGAGTCACATGGGAGTCACA	GGAGACAGATGGGAGGCAGATGG	6008	3	0.0499334	5852	10	0.170882	0.0542891	0.14904	0.29221	NS
25	GGAGTCACATGGGAGTCACA	GGAGCAGCAGGGGAGTCACAAGG	2710	19	0.701107	3220	4	0.124224	0.000464115	0.00212052	5.64391	Sig.
26	GGAGTCACATGGGAGTCACA	GGAGCCACATGGCAGTTTCATGG	13308	23	0.172828	13778	30	0.217738	0.413391	0.692232	0.793743	NS
27	GGAGTCACATGGGAGTCACA	GGAGCCACATGGCTGTCCCAGGG	16233	19	0.117046	16980	26	0.153121	0.456036	0.737493	0.764397	NS
28	GGAGTCACATGGGAGTCACA	GGAGCCAGACGGGAGGCACAGGG	3992	4	0.1002	3422	34	0.993571	2.63671e-08	2.1161e-07	0.100849	NS
29	GGAGTCACATGGGAGTCACA	GGAGCTACAAGGGAGCCACAGGG	720	1	0.138889	588	1	0.170068	1	1	0.816667	NS
31	GGAGTCACATGGGAGTCACA	GGAGGTACAGGGGAGGCACAGGG	1603	1	0.062383	962	0	0	1	1	10000000000	NS
32	GGAGTCACATGGGAGTCACA	GGAGTATCCTGGGATTCACAGGG	19227	15	0.0780153	16339	25	0.153008	0.0392514	0.113597	0.509877	NS
33	GGAGTCACATGGGAGTCACA	GGAGTCACTTTGGAGTCTCTGGG	22198	65	0.292819	20868	86	0.412114	0.0411762	0.11808	0.710529	NS
34	GGAGTCACATGGGAGTCACA	GGAGTCCCATGGGAACCACTTGG	6598	2	0.0303122	5249	8	0.15241	0.0274992	0.0842087	0.198886	NS
35	GGAGTCACATGGGAGTCACA	GGAGTCTCCGGGGAGTCTCAGGG	29126	56	0.192268	27547	227	0.824046	6.58243e-28	1.41151e-26	0.233322	NS
37	GGAGTCACATGGGAGTCACA	GGAGTGGGATGGCAGTCACATGG	25524	31	0.121454	28502	43	0.150867	0.414994	0.693922	0.805044	NS
39	GGAGTCACATGGGAGTCACA	GGGGTCACTTGAAAGTCACAGGG	190	1	0.526316	197	1	0.507614	1	1	1.03684	NS
40	GGAGTCACATGGGAGTCACA	GGGGTCACTTGTGAGTAACACGG	1257	2	0.159109	1571	5	0.318269	0.472571	0.755706	0.49992	NS
41	GGAGTCACATGGGAGTCACA	GGTGTCACATGGTATTCCCACGG	5372	4	0.0744602	4233	42	0.992204	1.99375e-11	2.08833e-10	0.0750452	NS
42	GGAGTCACATGGGAGTCACA	GGTTGCACATGGGAGTCACCTGG	8706	87	0.999311	7757	12	0.154699	1.27776e-13	1.56981e-12	6.45971	Sig.
44	GGAGTCACATGGGAGTCACA	GTGGTAGCATGGGAGTCACATGG	6578	7	0.106415	7408	12	0.161987	0.49171	0.777041	0.656937	NS
45	GGAGTCACATGGGAGTCACA	TGAGTCAGATGGGAGCCAAAAGG	4977	7	0.140647	3260	6	0.184049	0.777798	1	0.764182	NS
46	GGAGTCACATGGGAGTCACA	TGAGTCTCATGGGAGGCACCTGG	5486	11	0.20051	5127	17	0.331578	0.25559	0.496121	0.604716	NS
48	GGAGTCACATGGGAGTCACA	CAAATGACATGGGAGTCACAGGG	17218	16	0.092926	14268	134	0.939165	8.17515e-30	1.86567e-28	0.0989454	NS
49	GGAGTCACATGGGAGTCACA	CAAGTCCCATGGGAGTGACATGG	9581	18	0.187872	9370	50	0.533618	7.5631e-05	0.000384988	0.352072	NS
51	GGAGTCACATGGGAGTCACA	GACGTCACATGGGAGCCAGAGGG	7892	43	0.544856	7222	21	0.290778	0.0170789	0.0560829	1.87378	NS
53	GGAGTCACATGGGAGTCACA	GCAGTCTCATGGGACTCACTGGG	49874	70	0.140354	43019	355	0.825217	5.56911e-57	1.74328e-55	0.170081	NS
54	GGAGTCACATGGGAGTCACA	GCTGTCACCTGGGAGTCACCAGG	12640	80	0.632911	12582	35	0.278175	3.17082e-05	0.00017156	2.27523	Sig.
56	GGAGTCACATGGGAGTCACA	GGAATCACAGGGGACTCAGATGG	11453	19	0.165895	9956	26	0.261149	0.136823	0.312247	0.635252	NS
58	GGAGTCACATGGGAGTCACA	GGACTCATATGGGAGGCGCAGGG	1572	1	0.0636132	3128	7	0.223785	0.281935	0.53333	0.28426	NS
59	GGAGTCACATGGGAGTCACA	GGAGACAAATGAGAGTCCCATGG	8947	33	0.368839	7223	18	0.249204	0.204864	0.421702	1.48007	NS
60	GGAGTCACATGGGAGTCACA	GGAGACACCTGGGAGCCAGAGGG	15214	22	0.144604	14777	24	0.162415	0.76851	1	0.890337	NS
61	GGAGTCACATGGGAGTCACA	GGAGCAACATGGGACTCACACGG	17258	142	0.822807	18283	51	0.278948	1.55607e-12	1.80584e-11	2.94968	Sig.
65	GGAGTCACATGGGAGTCACA	GGAGGCAGATGGGACCCACATGG	1594	2	0.125471	2030	4	0.197044	0.700641	0.963729	0.636763	NS
66	GGAGTCACATGGGAGTCACA	GGAGGCCCCTGGGAGTCACCTGG	10050	9	0.0895522	10490	14	0.13346	0.407109	0.685697	0.671002	NS
67	GGAGTCACATGGGAGTCACA	GGAGTCACAGAGAAGGCACAGGG	1477	1	0.0677048	1415	1	0.0706714	1	1	0.958023	NS
68	GGAGTCACATGGGAGTCACA	GGAGTCACAGGGTAGGCACACGG	1953	1	0.0512033	809	3	0.370828	0.0782869	0.20126	0.138078	NS
69	GGAGTCACATGGGAGTCACA	GGAGTCACATGGCCTTCACCAGG	2657	3	0.112909	2910	8	0.274914	0.23142	0.460472	0.410708	NS
72	GGAGTCACATGGGAGTCACA	GGAGTCCCCTGGGAGTCCCCTGG	18329	17	0.0927492	17691	44	0.248714	0.000293578	0.00139045	0.372915	NS
74	GGAGTCACATGGGAGTCACA	GGGGCCAAATGGGAGTCCCACGG	15559	21	0.13497	14441	22	0.152344	0.760808	1	0.885956	NS
75	GGAGTCACATGGGAGTCACA	GGGGTCAAATGGGAGTCCCTGGG	3174	29	0.913674	3379	2	0.0591891	1.26406e-07	9.45733e-07	15.4365	Sig.
79	GGAGTCACATGGGAGTCACA	TAAGTTACATGGGAGTCACCTGG	1413	79	5.59094	795	1	0.125786	8.65249e-15	1.14017e-13	44.448	Sig.
81	GGAGTCACATGGGAGTCACA	TTAGTCTCAAGGGAGTCACATGG	15425	11	0.0713128	14348	33	0.229997	0.000399476	0.00185123	0.310059	NS
82	GTCTGGGACGCAAGGCGCCG	ATCTGGGAGGCAAGGCCCGGTGG	12046	75	0.622613	12308	19	0.154371	2.25035e-09	2.00276e-08	4.03322	Sig.
83	GTCTGGGACGCAAGGCGCCG	GCCTTGGACCCAAGGCGCCCAGG	3324	6	0.180505	3279	10	0.304971	0.328583	0.59471	0.591877	NS
85	GTCTGGGACGCAAGGCGCCG	GTCAGGGGCTCAGGGCGCCGGGG	10366	12	0.115763	10259	38	0.370406	0.000182165	0.000885359	0.31253	NS
87	GTCTGGGACGCAAGGCGCCG	GTCTGGGAGGGAAGGGCCCGAGG	1018	6	0.589391	1970	8	0.406091	0.573526	0.856775	1.45138	NS
92	GTCTGGGACGCAAGGCGCCG	CTCTGGGACGCCAGACGCAGTGG	248	0	0	325	1	0.307692	1	1	0	NS
93	GTCTGGGACGCAAGGCGCCG	CTCTGGGAGGCCAGGCGCAGTGG	2074	3	0.144648	1886	4	0.212089	0.71528	0.972838	0.682015	NS
94	GTCTGGGACGCAAGGCGCCG	GACTGGGAGGCCAGGCGCGGTGG	26508	12	0.0452694	22654	27	0.119184	0.00556609	0.0205862	0.379827	NS
96	GTCTGGGACGCAAGGCGCCG	GACTGGGGTGCAAGGCACCGGGG	6513	3	0.0460617	7312	11	0.150438	0.0629802	0.168396	0.306185	NS
97	GTCTGGGACGCAAGGCGCCG	GCCCGGGACTCACGGCGCCGCGG	11773	10	0.0849401	10263	12	0.116925	0.523974	0.808635	0.72645	NS
98	GTCTGGGACGCAAGGCGCCG	GCCTGGGACGCACGCTGCCGCGG	5580	44	0.78853	5735	52	0.906713	0.538973	0.824454	0.869658	NS
99	GTCTGGGACGCAAGGCGCCG	GCCTGGGACGCGGGGAGCCGGGG	12328	47	0.381246	9324	12	0.1287	0.000316402	0.00148478	2.96228	Sig.
100	GTCTGGGACGCAAGGCGCCG	GCCTGGGCCGCTAGGGGCCGCGG	9884	9	0.0910563	7999	9	0.112514	0.813378	1	0.809288	NS
102	GTCTGGGACGCAAGGCGCCG	GGCTGGGACGCCTGGGGCCGGGG	3445	12	0.348331	3952	87	2.20142	2.39093e-13	2.88536e-12	0.15823	NS
103	GTCTGGGACGCAAGGCGCCG	GTATGGGAGGCAGGGCGCAGTGG	2216	5	0.225632	2238	6	0.268097	1	1	0.841606	NS
104	GTCTGGGACGCAAGGCGCCG	GTCCGGGGCGCACGGCACCGAGG	821	1	0.121803	473	0	0	1	1	10000000000	NS
106	GTCTGGGACGCAAGGCGCCG	GTCTAGGTCGCTAGGCGCTGCGG	3178	2	0.0629327	3662	6	0.163845	0.2986	0.555582	0.384099	NS
107	GTCTGGGACGCAAGGCGCCG	GTCTGGACCGCAAGGGGGCGGGG	3747	3	0.0800641	2428	9	0.370675	0.0158554	0.052466	0.215995	NS
108	GTCTGGGACGCAAGGCGCCG	GTCTGGCAGGCCAGGCGCGGTGG	1659	4	0.241109	1532	1	0.0652742	0.376589	0.650885	3.69379	NS
109	GTCTGGGACGCAAGGCGCCG	GTCTGGGAAGCAAGTCGAAGTGG	4417	4	0.0905592	4017	7	0.174259	0.370066	0.643971	0.51968	NS
110	GTCTGGGACGCAAGGCGCCG	GTCTGGGAAGCAGGGACCCGGGG	13065	11	0.0841944	11845	11	0.0928662	0.834312	1	0.906621	NS
111	GTCTGGGACGCAAGGCGCCG	GTCTGGGACACAGGCTGCCGTGG	316	0	0	246	4	1.62602	0.0362075	0.106194	0	NS
112	GTCTGGGACGCAAGGCGCCG	GTCTGGGACGCACAGCCCCTTGG	4846	8	0.165085	3929	3	0.0763553	0.364843	0.638436	2.16206	NS
113	GTCTGGGACGCAAGGCGCCG	GTCTGGGACGGGAGGGGCCTTGG	23950	28	0.11691	21987	63	0.286533	5.18672e-05	0.000270252	0.408017	NS
114	GTCTGGGACGCAAGGCGCCG	GTCTGGGACTCATGGCCCCAGGG	1511	2	0.132363	1495	2	0.133779	1	1	0.989411	NS
115	GTCTGGGACGCAAGGCGCCG	GTCTGGGAGGCCAGGCGTGGTGG	14317	15	0.104771	14966	19	0.126954	0.610399	0.891475	0.825261	NS
116	GTCTGGGACGCAAGGCGCCG	GTCTGGGGCCCAAGGCCCCCGGG	8567	6	0.0700362	6762	9	0.133097	0.298302	0.555155	0.526205	NS
117	GTCTGGGACGCAAGGCGCCG	GTCTGGGGCGCCGGGCCCCGCGG	14157	20	0.141273	12086	18	0.148933	0.872327	1	0.948569	NS
118	GTCTGGGACGCAAGGCGCCG	GTCTGGTAAGCAAGGGGCAGGGG	4098	1	0.0244021	4251	3	0.0705716	0.625162	0.903196	0.345778	NS
119	GTCTGGGACGCAAGGCGCCG	GTCTGGTAGGCCAGGCGCAGTGG	1792	2	0.111607	1371	2	0.145879	1	1	0.765067	NS
120	GTCTGGGACGCAAGGCGCCG	GTCTTGGAGGCCAGGCACCGTGG	383	2	0.522193	307	0	0	0.505349	0.791189	10000000000	NS
121	GTCTGGGACGCAAGGCGCCG	GTGGGGGGCGCAAGGCGGCGGGG	2121	5	0.235738	2097	6	0.286123	0.772895	1	0.823904	NS
122	GTCTGGGACGCAAGGCGCCG	GTTTGGGAGGCCAGGCGCAGTGG	9432	10	0.106022	8693	15	0.172553	0.237347	0.46975	0.614433	NS
124	GTCTGGGACGCAAGGCGCCG	TTCTGGGACGCAAGGAGGCCTGG	20273	569	2.80669	15220	79	0.519054	8.50467e-66	2.75727e-64	5.40732	Sig.
125	GTCTGGGACGCAAGGCGCCG	CTCTAGGACGCCAGGCGCAGTGG	1188	1	0.0841751	1320	1	0.0757576	1	1	1.11111	NS
126	GTCTGGGACGCAAGGCGCCG	CTCTCGGCCCCAAGGCGCCGGGG	15458	12	0.0776297	15936	7	0.0439257	0.256729	0.497415	1.7673	NS
127	GTCTGGGACGCAAGGCGCCG	CTCTGGGATGCAAGGTTCCGAGG	37987	43	0.113197	29748	78	0.262203	8.19389e-06	4.80575e-05	0.431714	NS
128	GTCTGGGACGCAAGGCGCCG	CTGCGGGACGGAAGGCGCCGGGG	3107	2	0.0643708	4365	6	0.137457	0.482101	0.765849	0.468297	NS
129	GTCTGGGACGCAAGGCGCCG	GACTGCGCCGCACGGCGCCGGGG	571	5	0.875657	1298	11	0.847458	1	1	1.03327	NS
131	GTCTGGGACGCAAGGCGCCG	GCCTGGGTCCCCAGGCGCCGCGG	1076	0	0	1041	1	0.0960615	0.491734	0.777041	0	NS
132	GTCTGGGACGCAAGGCGCCG	GGCAGGGACCCAAGGCCCCGTGG	13037	14	0.107387	13004	13	0.0999692	1	1	1.0742	NS
135	GTCTGGGACGCAAGGCGCCG	GGCGGGGCCGCTAGGCGCCGCGG	6709	4	0.0596214	5702	7	0.122764	0.364955	0.638436	0.485659	NS
136	GTCTGGGACGCAAGGCGCCG	GGCTCGGACGCAGGACGCCGCGG	3163	1	0.0316156	1640	2	0.121951	0.270106	0.515118	0.259248	NS
137	GTCTGGGACGCAAGGCGCCG	GGCTGGGACGGAAGGCGGGGAGG	4104	1	0.0243665	4093	5	0.12216	0.124384	0.289274	0.199464	NS
138	GTCTGGGACGCAAGGCGCCG	GGCTGGGAGGCCAGGCGCGGTGG	24705	31	0.125481	23440	28	0.119454	0.896751	1	1.05045	NS
139	GTCTGGGACGCAAGGCGCCG	GTCAGGGACCAAAGGAGCCGTGG	1632	1	0.0612745	1469	0	0	1	1	10000000000	NS
141	GTCTGGGACGCAAGGCGCCG	GTCTAGGAGGCCAGGCGCTGTGG	14011	10	0.0713725	13254	21	0.158443	0.0462795	0.130156	0.450462	NS
142	GTCTGGGACGCAAGGCGCCG	GTCTGGACCGCGAGGCTCCGCGG	3958	3	0.0757959	3857	6	0.155561	0.337462	0.606349	0.487241	NS
143	GTCTGGGACGCAAGGCGCCG	GTCTGGGAAGCCAGGCGCAGGGG	11124	8	0.0719166	11185	26	0.232454	0.00291764	0.0114822	0.30938	NS
144	GTCTGGGACGCAAGGCGCCG	GTCTGGGACCCAGGGCACCTGGG	2983	1	0.0335233	1704	5	0.293427	0.0264854	0.0816067	0.114247	NS
145	GTCTGGGACGCAAGGCGCCG	GTCTGGGACTCAGGGCGTCCAGG	1751	20	1.1422	997	15	1.50451	0.479572	0.763762	0.759185	NS
147	GTCTGGGACGCAAGGCGCCG	GTCTGGGAGAGAAGGGGCCGTGG	2595	3	0.115607	2877	8	0.278067	0.232929	0.462799	0.415751	NS
148	GTCTGGGACGCAAGGCGCCG	GTCTGGGAGCCAAGGAGCCAGGG	3153	15	0.475737	2774	5	0.180245	0.0704109	0.184318	2.63939	NS
149	GTCTGGGACGCAAGGCGCCG	GTCTGGGAGGCCAGGCACGGTGG	11147	13	0.116623	8392	13	0.154909	0.553168	0.839083	0.752848	NS
151	GTCTGGGACGCAAGGCGCCG	GTCTGGGAGGGGAGGCGCCTTGG	4864	11	0.226151	5542	24	0.433057	0.088663	0.22227	0.522221	NS
152	GTCTGGGACGCAAGGCGCCG	GTCTGGGCCTCAAGGGGCCCTGG	16308	12	0.0735835	12213	17	0.139196	0.0932113	0.23147	0.528633	NS
153	GTCTGGGACGCAAGGCGCCG	GTCTGTGAGGCCAGGCGCGGTGG	2921	0	0	2135	4	0.187354	0.0317437	0.0950334	0	NS
154	GTCTGGGACGCAAGGCGCCG	GTGTGGGCCACAAGGCGGCGCGG	1678	3	0.178784	1424	1	0.0702247	0.629776	0.906336	2.54589	NS
155	GTCTGGGACGCAAGGCGCCG	TTCTTGGAGGCCAGGCGCCGTGG	13451	6	0.0446063	11550	15	0.12987	0.0268552	0.0824838	0.343469	NS
156	GGCCTTCATCAGCTTTTCCA	AGCTTTCATCAGATTCTCCAAGG	12479	29	0.23239	10199	35	0.343171	0.131333	0.301834	0.677186	NS
157	GGCCTTCATCAGCTTTTCCA	GGCCTTCATCAGCTTAACAATGG	82240	151	0.183609	78405	292	0.372425	4.12109e-13	4.90091e-12	0.493009	NS
159	GGCCTTCATCAGCTTTTCCA	TGCCTTAATCTGCCTTTCCAGGG	21351	30	0.140509	20659	49	0.237185	0.0241276	0.075295	0.592402	NS
164	GGCCTTCATCAGCTTTTCCA	GGCTTTCATCAGATTCTCAAAGG	11913	18	0.151095	9950	29	0.291457	0.0279589	0.0853605	0.518414	NS
167	GGCCTTCATCAGCTTTTCCA	AGCCTGCATCATCTTGTCCATGG	10308	17	0.16492	10105	40	0.395844	0.00204248	0.00829791	0.41663	NS
168	GGCCTTCATCAGCTTTTCCA	AGGCTTCCTCAGCTTTGCCAAGG	7896	52	0.658561	6281	26	0.413947	0.0524556	0.144687	1.59093	NS
169	GGCCTTCATCAGCTTTTCCA	ATCCTTCATCAGCTTCTCAAGGG	17848	44	0.246526	15245	23	0.150869	0.0650749	0.172645	1.63404	NS
170	GGCCTTCATCAGCTTTTCCA	GACCTTCATCATCAGTTCCAAGG	3866	7	0.181066	4270	42	0.983607	1.77988e-06	1.13606e-05	0.184083	NS
171	GGCCTTCATCAGCTTTTCCA	GACTTTCATCAGCTTCTCCCTGG	18546	21	0.113232	18192	30	0.164908	0.207952	0.425848	0.686639	NS
172	GGCCTTCATCAGCTTTTCCA	GCACATCATCAGCTCTTCCAGGG	1963	12	0.611309	2402	11	0.457952	0.532532	0.81751	1.33488	NS
173	GGCCTTCATCAGCTTTTCCA	GGCATTCATCTGCTTCCCCATGG	10242	80	0.781097	10027	37	0.369004	0.000123703	0.000617006	2.11677	Sig.
174	GGCCTTCATCAGCTTTTCCA	GGCCATCATCACCTTTCACATGG	15436	14	0.0906971	14604	60	0.410846	1.34241e-08	1.11345e-07	0.220757	NS
175	GGCCTTCATCAGCTTTTCCA	GGCCCTCATCAGTTTGTCTAGGG	18440	117	0.63449	20022	40	0.19978	1.75337e-11	1.8484e-10	3.17594	Sig.
176	GGCCTTCATCAGCTTTTCCA	GGCCCTCTTCTGCATTTCCATGG	41701	56	0.134289	42229	192	0.454664	2.17774e-18	3.48865e-17	0.29536	NS
177	GGCCTTCATCAGCTTTTCCA	GGCCGTCATCAGATTCTCAAAGG	14957	14	0.0936017	12650	19	0.150198	0.220817	0.445341	0.62319	NS
178	GGCCTTCATCAGCTTTTCCA	GGCCTCCATCACCTTCTGCAGGG	9529	13	0.136426	8066	12	0.148773	0.843487	1	0.917008	NS
180	GGCCTTCATCAGCTTTTCCA	GGCCTCCATGAGCTTCTCTATGG	15048	20	0.132908	13199	26	0.196985	0.187035	0.395511	0.674713	NS
181	GGCCTTCATCAGCTTTTCCA	GGCCTGCAGCAGCTGCTCCAGGG	361	1	0.277008	350	1	0.285714	1	1	0.969529	NS
182	GGCCTTCATCAGCTTTTCCA	GGCCTGCATCAGATTCACCAGGG	1258	3	0.238474	1339	3	0.224048	1	1	1.06439	NS
183	GGCCTTCATCAGCTTTTCCA	GGCCTTCAGGAACTCTTCCATGG	19058	17	0.0892014	14408	21	0.145752	0.141551	0.32044	0.612006	NS
184	GGCCTTCATCAGCTTTTCCA	GGCCTTCATAATCATCTCCATGG	19484	25	0.12831	17676	100	0.565739	1.0189e-13	1.26704e-12	0.226801	NS
185	GGCCTTCATCAGCTTTTCCA	GGCCTTCATCATCTCTTGCCAGG	9099	13	0.142873	9033	17	0.188199	0.471231	0.754894	0.759159	NS
186	GGCCTTCATCAGCTTTTCCA	GGCCTTCATCTGCTTCACCCTGG	26012	30	0.115331	26887	112	0.416558	8.58705e-12	9.44229e-11	0.276867	NS
187	GGCCTTCATCAGCTTTTCCA	GGCCTTCATCTTCTTTAGCAAGG	16433	21	0.127792	15681	44	0.280594	0.0026516	0.0105317	0.455432	NS
188	GGCCTTCATCAGCTTTTCCA	GGCCTTCCACAGCCTTTCCAAGG	16341	31	0.189707	14410	55	0.381679	0.00160486	0.00663211	0.497032	NS
189	GGCCTTCATCAGCTTTTCCA	GGCCTTCTTCAGCATCACCAGGG	13993	20	0.142929	14551	27	0.185554	0.385588	0.659739	0.770279	NS
190	GGCCTTCATCAGCTTTTCCA	GGCCTTGAGCAACTTGTCCAAGG	10822	30	0.277213	9497	95	1.00032	2.82389e-11	2.9241e-10	0.277126	NS
191	GGCCTTCATCAGCTTTTCCA	GGCCTTGATGAGCATTTCCAGGG	21485	9	0.0418897	18248	24	0.131521	0.00249531	0.00996417	0.318501	NS
192	GGCCTTCATCAGCTTTTCCA	GGCCTTTGTCAGCATTTCCTCGG	17141	23	0.134181	17602	37	0.210203	0.0938979	0.232892	0.63834	NS
193	GGCCTTCATCAGCTTTTCCA	GGCGTTCAGCAGCCTTCCCAGGG	8963	9	0.100413	9476	10	0.10553	1	1	0.951512	NS
194	GGCCTTCATCAGCTTTTCCA	GGCTTTCAGCACCTTCTCCATGG	41357	220	0.531953	40969	106	0.258732	3.4927e-10	3.27993e-09	2.056	Sig.
195	GGCCTTCATCAGCTTTTCCA	GGCTTTGATCAGCTTGTCCAAGG	29696	53	0.178475	28179	51	0.180986	1	1	0.986128	NS
197	GGCCTTCATCAGCTTTTCCA	GGTCTCCATCAGCTTATACAGGG	1773	43	2.42527	1625	9	0.553846	4.63904e-06	2.81373e-05	4.37896	Sig.
198	GGCCTTCATCAGCTTTTCCA	TGCCTCCAACAGCTATTCCACGG	24916	175	0.70236	21067	58	0.275312	5.47702e-11	5.55866e-10	2.55114	Sig.
199	GGCCTTCATCAGCTTTTCCA	TGCCTTCATCAGCCTGGCCACGG	13186	33	0.250265	12534	13	0.103718	0.00720073	0.0258479	2.41294	Sig.
200	GGCCTTCATCAGCTTTTCCA	TGCTTTCATCAGCTCATCCACGG	1953	6	0.30722	2760	4	0.144928	0.335977	0.604345	2.11982	NS
201	GGCCTTCATCAGCTTTTCCA	TGTCTTCATCAGCATCTCCAGGG	17436	22	0.126176	14611	209	1.43043	1.59055e-47	4.65764e-46	0.0882083	NS
202	GGCCTTCATCAGCTTTTCCA	AGACTTCATCAGATTCTCCAGGG	7911	53	0.669953	6426	21	0.326797	0.00465115	0.0174712	2.05006	Sig.
203	GGCCTTCATCAGCTTTTCCA	AGCCGTCATCTGCTTTGCCAGGG	14561	55	0.377721	13301	19	0.142846	0.000153152	0.000752407	2.64425	Sig.
204	GGCCTTCATCAGCTTTTCCA	AGCCTTCAGCAGCATTTCCCTGG	11626	21	0.18063	13175	22	0.166983	0.878773	1	1.08173	NS
205	GGCCTTCATCAGCTTTTCCA	AGCCTTCATCAATTCTTCCAGGG	12181	25	0.205238	11351	32	0.281913	0.23596	0.46791	0.728016	NS
206	GGCCTTCATCAGCTTTTCCA	AGCCTTCCTCTGCTTTGCCAAGG	18146	72	0.396782	16201	57	0.35183	0.536626	0.821787	1.12776	NS
207	GGCCTTCATCAGCTTTTCCA	AGCTTTCATCAGCTCTTCAAAGG	8894	7	0.0787047	8406	17	0.202236	0.0392007	0.113531	0.389172	NS
208	GGCCTTCATCAGCTTTTCCA	CGCCTTAGTCAGCTTTGCCAGGG	30196	14	0.0463638	30175	20	0.06628	0.310204	0.571962	0.699513	NS
209	GGCCTTCATCAGCTTTTCCA	GCCCTTCATCCGCTTTCCCGCGG	6854	9	0.13131	7677	15	0.195389	0.415264	0.693947	0.672046	NS
210	GGCCTTCATCAGCTTTTCCA	GCCCTTCATTAGCTTTACCAAGG	11190	7	0.0625559	10853	11	0.101354	0.352641	0.623844	0.617199	NS
211	GGCCTTCATCAGCTTTTCCA	GCCCTTCCCCAGCTTTCCCAGGG	56571	82	0.144951	45590	130	0.28515	1.09249e-06	7.22141e-06	0.508331	NS
212	GGCCTTCATCAGCTTTTCCA	GCCTTTCATAAGCTTTACCAAGG	14526	13	0.0894947	16819	83	0.49349	9.4774e-12	1.02972e-10	0.181351	NS
213	GGCCTTCATCAGCTTTTCCA	GGACTTCAACAGCCTGTCCAAGG	6756	9	0.133215	6664	9	0.135054	1	1	0.986382	NS
214	GGCCTTCATCAGCTTTTCCA	GGCAATCATCAGCTTCTCCAAGG	2533	5	0.197394	2388	10	0.41876	0.198756	0.413401	0.471378	NS
215	GGCCTTCATCAGCTTTTCCA	GGCATTCCTCAGGGTTTCCAGGG	35303	86	0.243605	31864	155	0.486442	1.81911e-07	1.32816e-06	0.50079	NS
216	GGCCTTCATCAGCTTTTCCA	GGCCAGCATGAGCTTCTCCATGG	978	1	0.102249	797	0	0	1	1	10000000000	NS
217	GGCCTTCATCAGCTTTTCCA	GGCCATCATCAGCAGTTCCGTGG	11447	12	0.104831	12496	22	0.176056	0.170062	0.368346	0.59544	NS
218	GGCCTTCATCAGCTTTTCCA	GGCCCTCATCAGCTCTTACTTGG	40619	246	0.605628	36620	129	0.352267	4.29017e-07	2.97797e-06	1.71923	NS
219	GGCCTTCATCAGCTTTTCCA	GGCCCTCCTCAGCTCCTCCAGGG	2542	8	0.314713	2707	10	0.369413	0.815861	1	0.851928	NS
220	GGCCTTCATCAGCTTTTCCA	GGCCTCCAGCAGTTTATCCAGGG	974	15	1.54004	784	20	2.55102	0.168745	0.36637	0.603696	NS
221	GGCCTTCATCAGCTTTTCCA	GGCCTCCATCCCCTTTGCCAGGG	5469	11	0.201134	4877	33	0.676645	0.000213315	0.00102819	0.297251	NS
222	GGCCTTCATCAGCTTTTCCA	GGCCTCCCTTAGCTCTTCCATGG	64142	57	0.0888653	63368	126	0.198839	1.70214e-07	1.24834e-06	0.446922	NS
223	GGCCTTCATCAGCTTTTCCA	GGCCTTAATGAGCTTTACAACGG	977	2	0.204708	640	5	0.78125	0.120916	0.282738	0.262027	NS
224	GGCCTTCATCAGCTTTTCCA	GGCCTTCAGCACCTCCTCCAGGG	5525	14	0.253394	4503	26	0.577393	0.0157892	0.0522681	0.438858	NS
225	GGCCTTCATCAGCTTTTCCA	GGCCTTCATCATCTTCAACATGG	4912	12	0.2443	3531	3	0.0849618	0.115781	0.274502	2.87541	NS
226	GGCCTTCATCAGCTTTTCCA	GGCCTTCATCATCTTTCTCCCGG	22985	26	0.113117	23337	74	0.317093	1.73592e-06	1.11148e-05	0.356732	NS
227	GGCCTTCATCAGCTTTTCCA	GGCCTTCATCGCCTTCCCCAAGG	15017	34	0.22641	16894	35	0.207174	0.719032	0.975667	1.09285	NS
228	GGCCTTCATCAGCTTTTCCA	GGCCTTCATTAGTTCTTACAGGG	6395	11	0.172009	6657	31	0.465675	0.00307428	0.0120249	0.369376	NS
229	GGCCTTCATCAGCTTTTCCA	GGCCTTCATTTGCATTTCTATGG	16279	17	0.104429	15951	33	0.206884	0.022917	0.0719847	0.504772	NS
230	GGCCTTCATCAGCTTTTCCA	GGCCTTCATTTGCTTATCAAAGG	12701	13	0.102354	11750	27	0.229787	0.0167443	0.0550949	0.44543	NS
231	GGCCTTCATCAGCTTTTCCA	GGCCTTCCTCACCTTGTCCAGGG	3118	2	0.0641437	2382	5	0.209908	0.25103	0.489829	0.305581	NS
232	GGCCTTCATCAGCTTTTCCA	GGCCTTCCTCAGCTTTACCTTGG	8208	31	0.37768	7358	22	0.298994	0.412456	0.691376	1.26317	NS
233	GGCCTTCATCAGCTTTTCCA	GGCCTTTATCAGCCATTCCTGGG	10672	32	0.29985	11590	50	0.431406	0.120908	0.282738	0.695052	NS
234	GGCCTTCATCAGCTTTTCCA	GGCTTTCATCACCTTGTCAAAGG	29541	42	0.142175	27581	62	0.224792	0.0235774	0.0737832	0.632474	NS
235	GGCCTTCATCAGCTTTTCCA	GGCTTTCATCTGAATTTCCAGGG	17677	50	0.282853	16385	72	0.439426	0.0179974	0.0584648	0.643688	NS
236	GGCCTTCATCAGCTTTTCCA	GGCTTTGATCAGCTTTCCAATGG	7950	22	0.27673	8857	24	0.270972	1	1	1.02125	NS
237	GGCCTTCATCAGCTTTTCCA	GGGCTCTATCAGCTTTGCCAGGG	3780	17	0.449735	3121	53	1.69817	3.2916e-07	2.33238e-06	0.264835	NS
238	GGCCTTCATCAGCTTTTCCA	GGGCTTCATCAGCTTCTCAGCGG	15248	13	0.0852571	14169	21	0.148211	0.12406	0.288766	0.575242	NS
239	GGCCTTCATCAGCTTTTCCA	GGTCTACATCAGATATTCCAGGG	12641	87	0.688237	10543	32	0.303519	4.05035e-05	0.000215158	2.26752	Sig.
240	GGCCTTCATCAGCTTTTCCA	GGTCTTCATCATCTTTCCTAGGG	16496	37	0.224297	13597	78	0.573656	1.16729e-06	7.69942e-06	0.390995	NS
241	GGCCTTCATCAGCTTTTCCA	TGCCTGCCTCAGCCTTTCCAAGG	21382	32	0.149659	17828	42	0.235584	0.0609862	0.164062	0.635265	NS
242	GGCCTTCATCAGCTTTTCCA	TGCCTTAATCAGCTCTTCCATGG	17865	24	0.134341	17875	34	0.19021	0.236667	0.468857	0.706277	NS
243	GGCCTTCATCAGCTTTTCCA	TGCCTTCATCAGTTTGTCCTGGG	36564	30	0.0820479	34638	51	0.147237	0.0104242	0.0361026	0.55725	NS
244	GGCTGAGGAAGCTGAGGAGG	AACTCAGGAAGCTGAGGTGGGGG	2170	2	0.0921659	19699	43	0.218285	0.316586	0.579804	0.422227	NS
245	GGCTGAGGAAGCTGAGGAGG	AGAAGAGGAAGATGAGGAGGAGG	1234	2	0.162075	7493	10	0.133458	0.682732	0.951701	1.21442	NS
246	GGCTGAGGAAGCTGAGGAGG	AGATGAGGAAACTGAGGAGAAGG	426	57	13.3803	2740	9	0.328467	8.83704e-42	2.44741e-40	40.7355	Sig.
248	GGCTGAGGAAGCTGAGGAGG	AGATGAGGAAACTGAGGCGGGGG	250	2	0.8	5130	14	0.272904	0.16862	0.366195	2.93143	NS
249	GGCTGAGGAAGCTGAGGAGG	AGATGAGGAAGAGGAGGAGGAGG	1259	2	0.158856	6121	12	0.196046	1	1	0.810299	NS
250	GGCTGAGGAAGCTGAGGAGG	AGCTGAGGAAGAGGAGGAAGAGG	929	8	0.861141	7666	31	0.404383	0.0650851	0.172645	2.12952	NS
253	GGCTGAGGAAGCTGAGGAGG	AGCTTAGGGGGCTGAGGAGGGGG	173	3	1.7341	718	17	2.36769	0.779742	1	0.732404	NS
254	GGCTGAGGAAGCTGAGGAGG	AGTTGAGTAGGCTGAGGAGGAGG	654	2	0.30581	8341	22	0.263757	0.69244	0.95626	1.15944	NS
255	GGCTGAGGAAGCTGAGGAGG	CACTGAGCAGGCTGAGGAGGAGG	148	1	0.675676	9535	62	0.650236	0.622243	0.901689	1.03912	NS
259	GGCTGAGGAAGCTGAGGAGG	CACTGAGTAGGCTGAGGAGGAGG	15222	17	0.11168	95753	311	0.324794	7.27003e-07	4.9169e-06	0.34385	NS
268	GGCTGAGGAAGCTGAGGAGG	CATTGAGGAGGCTGAGGAGGAGG	2212	2	0.0904159	18918	197	1.04134	1.40892e-07	1.04644e-06	0.0868268	NS
274	GGCTGAGGAAGCTGAGGAGG	CGCTGAGTAGGCTGAGGAGGAGG	869	1	0.115075	3514	6	0.170746	1	1	0.673955	NS
275	GGCTGAGGAAGCTGAGGAGG	CGTTGAGTAGGCTGAGGAGGAGG	10348	58	0.560495	76408	274	0.358601	0.0028813	0.0113666	1.563	NS
289	GGCTGAGGAAGCTGAGGAGG	CGTTGAGTAGGCTGAGGAGGGGG	1182	1	0.0846024	8770	10	0.114025	1	1	0.741963	NS
292	GGCTGAGGAAGCTGAGGAGG	GACTGAGGAAGAAGAGGAAGAGG	1606	3	0.1868	10960	14	0.127737	0.470525	0.754058	1.46237	NS
293	GGCTGAGGAAGCTGAGGAGG	GACTGAGGAAGAGGAGGAAGAGG	1908	4	0.209644	12682	103	0.812175	0.00215209	0.00870426	0.258126	NS
297	GGCTGAGGAAGCTGAGGAGG	GACTGAGGAATCTGAGGAGGGGG	1245	507	40.7229	9272	11	0.118637	0	0	343.257	Sig.
299	GGCTGAGGAAGCTGAGGAGG	GACTGAGGAGGAAGAGGAGGAGG	389	2	0.514139	5166	16	0.309717	0.362541	0.635856	1.66003	NS
303	GGCTGAGGAAGCTGAGGAGG	GGAAGAGGAAGAAGAGGAGGAGG	5113	31	0.606298	63728	136	0.213407	1.98478e-06	1.25996e-05	2.84104	Sig.
318	GGCTGAGGAAGCTGAGGAGG	GGAAGAGGAAGACGAGGAGGAGG	787	1	0.127065	6350	14	0.220472	1	1	0.57633	NS
320	GGCTGAGGAAGCTGAGGAGG	GGAAGAGGAAGAGGAGGAGGAGG	11171	49	0.438636	101063	362	0.358192	0.186119	0.394754	1.22458	NS
351	GGCTGAGGAAGCTGAGGAGG	GGAAGAGGAGGATGAGGAGGAGG	2378	3	0.126156	14503	82	0.5654	0.00255855	0.0101968	0.223128	NS
368	GGCTGAGGAAGCTGAGGAGG	GGAGGAGGAAGAAGAGGAGGAGG	2433	59	2.42499	23173	64	0.276183	3.8562e-28	8.37904e-27	8.78036	Sig.
393	GGCTGAGGAAGCTGAGGAGG	GGAGGAGGAAGAGGAGGAGGAGG	9452	187	1.97842	110375	558	0.505549	2.3107e-46	6.67082e-45	3.9134	Sig.
512	GGCTGAGGAAGCTGAGGAGG	AGATGAGGAAGAAGAGGAGGAGG	1133	40	3.53045	6487	14	0.215816	1.6683e-22	3.1048e-21	16.3586	Sig.
516	GGCTGAGGAAGCTGAGGAGG	AGCAGAGGAAGAAGAGGAGGAGG	2315	2	0.0863931	12111	53	0.437619	0.00871603	0.0307602	0.197416	NS
530	GGCTGAGGAAGCTGAGGAGG	CACTGAGTAGGCTGAGGAGGGGG	250	1	0.4	6724	11	0.163593	0.354946	0.62633	2.44509	NS
557	GGCTGAGGAAGCTGAGGAGG	GACTCAGGAGGATGAGGAGGTGG	5276	5	0.0947688	32416	119	0.367103	0.000409263	0.00189229	0.258153	NS
563	GGCTGAGGAAGCTGAGGAGG	GACTCAGGAGGCTGAGGTGGGGG	4303	3	0.0697188	21270	27	0.126939	0.463227	0.745727	0.549229	NS
566	GGCTGAGGAAGCTGAGGAGG	GACTGAGAGAGCTGAGGATGAGG	1228	0	0	10713	20	0.186689	0.257084	0.497628	0	NS
574	GGCTGAGGAAGCTGAGGAGG	GACTGAGGAGGAGGAGGAGGAGG	262	1	0.381679	1115	12	1.07623	0.482086	0.765849	0.354644	NS
575	GGCTGAGGAAGCTGAGGAGG	GATTGAGTAGGCTGAGGAGGAGG	1516	21	1.38522	15066	24	0.159299	5.84266e-11	5.88588e-10	8.69575	Sig.
578	GGCTGAGGAAGCTGAGGAGG	GCCTGAGGAGGAGGAGGAGGAGG	754	2	0.265252	8076	75	0.928678	0.0635515	0.169678	0.285623	NS
626	GGCTGAGGAAGCTGAGGAGG	GGACGAGGAGGATGAGGAGGAGG	976	1	0.102459	6427	12	0.186712	1	1	0.548753	NS
630	GGCTGAGGAAGCTGAGGAGG	GGAGGAGAAAGCGGAGGAGGAGG	1253	2	0.159617	9877	99	1.00233	0.00122003	0.00514062	0.159246	NS
801	GGCTGAGGAAGCTGAGGAGG	AACAGAGGAAGCTGAGAAGGTGG	160	1	0.625	1176	4	0.340136	0.472089	0.755094	1.8375	NS
802	GGCTGAGGAAGCTGAGGAGG	AACTCAGGAAGCTGAGGTGGAGG	3762	0	0	23545	21	0.0891909	0.103187	0.252179	0	NS
803	GGCTGAGGAAGCTGAGGAGG	AACTGAGGATGCTGAGGAAGGGG	2214	3	0.135501	12765	96	0.752056	0.000283447	0.00134481	0.180174	NS
804	GGCTGAGGAAGCTGAGGAGG	AACTTAGGGAGCTGAGGAGGCGG	1376	6	0.436047	8560	86	1.00467	0.0468389	0.131458	0.434018	NS
806	GGCTGAGGAAGCTGAGGAGG	AGAAGAGGAAGGTGAGGAGGAGG	1811	0	0	8531	16	0.187551	0.0925781	0.230248	0	NS
808	GGCTGAGGAAGCTGAGGAGG	AGATGAGGAAACTGAGGTGGGGG	400	0	0	1892	3	0.158562	1	1	0	NS
809	GGCTGAGGAAGCTGAGGAGG	AGATGAGGAAGCAGAGGAAGGGG	515	61	11.8447	3157	4	0.126703	1.48759e-48	4.3718e-47	93.484	Sig.
810	GGCTGAGGAAGCTGAGGAGG	AGATGAGGAAGCTGAGAATGAGG	159	0	0	1767	4	0.226372	1	1	0	NS
812	GGCTGAGGAAGCTGAGGAGG	AGATGAGGAAGCTGAGGCAGGGG	1521	0	0	6172	12	0.194426	0.140366	0.318995	0	NS
815	GGCTGAGGAAGCTGAGGAGG	AGCAGAGGAAGAGGAGGAGGAGG	1685	1	0.0593472	7875	9	0.114286	1	1	0.519288	NS
816	GGCTGAGGAAGCTGAGGAGG	AGCCCAGGAAGCTGAGGACGCGG	619	0	0	5591	12	0.214631	0.622862	0.902063	0	NS
819	GGCTGAGGAAGCTGAGGAGG	AGCTCAGGAAGGTGAGGAGCTGG	2543	1	0.0393236	13498	10	0.074085	1	1	0.53079	NS
821	GGCTGAGGAAGCTGAGGAGG	AGCTCTGGACGCTGAGGAGGTGG	655	0	0	6284	15	0.238701	0.388324	0.662887	0	NS
823	GGCTGAGGAAGCTGAGGAGG	AGCTGAGCGAGCTGAGGATGCGG	1035	2	0.193237	5110	7	0.136986	0.653249	0.926731	1.41063	NS
825	GGCTGAGGAAGCTGAGGAGG	AGCTGAGGAAGCAGGGCAGGCGG	253	2	0.790514	2089	8	0.382958	0.29508	0.550664	2.06423	NS
827	GGCTGAGGAAGCTGAGGAGG	AGCTGAGGAAGCTGAGGCTCAGG	1022	31	3.03327	4278	13	0.30388	1.81569e-13	2.20746e-12	9.98179	Sig.
828	GGCTGAGGAAGCTGAGGAGG	AGCTGAGGAAGCTGAGGCTTAGG	315	0	0	3620	7	0.19337	1	1	0	NS
830	GGCTGAGGAAGCTGAGGAGG	AGCTGAGGAATCTGACAAGGTGG	990	3	0.30303	6966	15	0.215332	0.483226	0.767041	1.40727	NS
832	GGCTGAGGAAGCTGAGGAGG	AGCTGAGGAGGCGGCGGAGGGGG	868	1	0.115207	3616	9	0.248894	0.698061	0.960937	0.462878	NS
833	GGCTGAGGAAGCTGAGGAGG	AGCTGAGGAGTCTGAGGAGGTGG	857	79	9.2182	3769	9	0.23879	7.35736e-49	2.17002e-47	38.6038	Sig.
834	GGCTGAGGAAGCTGAGGAGG	AGCTGAGGGAGATGAGGAGGAGG	1331	44	3.30579	7513	8	0.106482	7.69219e-29	1.69852e-27	31.0455	Sig.
839	GGCTGAGGAAGCTGAGGAGG	AGTGGAGGGAGCTGAGGAGGTGG	2424	0	0	13521	21	0.155314	0.0618857	0.166045	0	NS
840	GGCTGAGGAAGCTGAGGAGG	AGTTGAGAAAGCTGTGGAGGAGG	2267	2	0.0882223	14024	20	0.142613	0.759077	1	0.618615	NS
841	GGCTGAGGAAGCTGAGGAGG	AGTTGAGGAAGCTCAGGATGAGG	1254	1	0.0797448	5679	9	0.158479	1	1	0.50319	NS
843	GGCTGAGGAAGCTGAGGAGG	AGTTGAGTAAGCTGAGGAGGAGG	1001	200	19.98	6461	132	2.04303	1.70303e-94	5.94604e-93	9.77961	Sig.
845	GGCTGAGGAAGCTGAGGAGG	AGTTTAGGAAGATGAGGAGGAGG	950	2	0.210526	4018	4	0.099552	0.32307	0.587595	2.11474	NS
846	GGCTGAGGAAGCTGAGGAGG	ATCTGAAGAAGCTGAGGAGAAGG	64	1	1.5625	224	1	0.446429	0.395664	0.672332	3.5	NS
848	GGCTGAGGAAGCTGAGGAGG	CACTCAGGAGGCTGAGGAGGTGG	1003	0	0	6447	68	1.05475	9.81691e-05	0.000492957	0	NS
850	GGCTGAGGAAGCTGAGGAGG	CACTGAGGAGGCTGAGGAGGAGG	222	45	20.2703	1364	9	0.659824	1.05616e-31	2.56811e-30	30.7207	Sig.
851	GGCTGAGGAAGCTGAGGAGG	CAGAGAGGAAGCTGAGGAGGTGG	737	259	35.1425	4420	5	0.113122	2.04131e-229	8.91846e-228	310.659	Sig.
852	GGCTGAGGAAGCTGAGGAGG	CCCTGAGGAAGCTGGGGAGGCGG	1238	1137	91.8417	8470	60	0.708383	0	0	129.65	Sig.
853	GGCTGAGGAAGCTGAGGAGG	CCCTGAGGAGGCTGAGGTGGAGG	1234	5	0.405186	6766	18	0.266036	0.385255	0.659446	1.52305	NS
854	GGCTGAGGAAGCTGAGGAGG	CCCTGAGGCAGCTGAGGAGGGGG	3115	57	1.82986	17654	29	0.164269	5.00861e-27	1.05194e-25	11.1394	Sig.
857	GGCTGAGGAAGCTGAGGAGG	CGCAGAGCAAGCTGAGCAGGGGG	868	1	0.115207	5206	11	0.211295	1	1	0.545245	NS
859	GGCTGAGGAAGCTGAGGAGG	CGCTGAGGAGGAGGAGGAGGCGG	725	2	0.275862	6479	73	1.12672	0.0313104	0.0939772	0.244837	NS
861	GGCTGAGGAAGCTGAGGAGG	CGTTGAGGAGGCTAAGGAGGAGG	936	1	0.106838	5559	29	0.521677	0.113372	0.269887	0.204797	NS
863	GGCTGAGGAAGCTGAGGAGG	CGTTGAGTAAGCTGAGGAAGAGG	945	0	0	5135	10	0.194742	0.378362	0.652568	0	NS
864	GGCTGAGGAAGCTGAGGAGG	CTCTGAGGAAGATGAGGACGAGG	485	1	0.206186	2346	9	0.383632	1	1	0.537457	NS
865	GGCTGAGGAAGCTGAGGAGG	GAAGGAGGAAGCGGAGGAGGAGG	1026	1	0.0974659	6521	15	0.230026	0.712983	0.971271	0.423717	NS
867	GGCTGAGGAAGCTGAGGAGG	GAATGAGGAAGAAGAGGAGGAGG	373	1	0.268097	1739	2	0.115009	0.441935	0.72429	2.3311	NS
873	GGCTGAGGAAGCTGAGGAGG	GACTGAGCAGGCTTAGGAGGTGG	1803	5	0.277316	8258	12	0.145314	0.209735	0.428597	1.90839	NS
874	GGCTGAGGAAGCTGAGGAGG	GACTGAGGAAGAGAAGGAGGTGG	1567	4	0.255265	8545	16	0.187244	0.537069	0.822157	1.36327	NS
876	GGCTGAGGAAGCTGAGGAGG	GACTGAGGAAGATGAGGAGGAGG	365	264	72.3288	2653	1	0.0376932	2.15971e-293	1.00828e-291	1918.88	Sig.
877	GGCTGAGGAAGCTGAGGAGG	GACTGAGGAGGCCGGGGAGGAGG	447	3	0.671141	2404	0	0	0.00383237	0.0146929	10000000000	Sig.
878	GGCTGAGGAAGCTGAGGAGG	GACTGAGGCTGCTGAAGAGGTGG	755	2	0.264901	5536	42	0.758671	0.161874	0.355801	0.349164	NS
879	GGCTGAGGAAGCTGAGGAGG	GACTGCGGTAGTTGAGGAGGTGG	1355	1	0.0738007	7580	18	0.237467	0.342157	0.61169	0.310783	NS
880	GGCTGAGGAAGCTGAGGAGG	GACTTAAGAAGCTGAGGAGCTGG	1467	3	0.204499	7986	19	0.237916	1	1	0.859541	NS
882	GGCTGAGGAAGCTGAGGAGG	GAGTGAGAAAGCGGAGGAGGAGG	546	1	0.18315	4041	26	0.643405	0.244051	0.480572	0.284658	NS
883	GGCTGAGGAAGCTGAGGAGG	GAGTGAGGCAGCTGGGGAGGTGG	572	2	0.34965	2057	9	0.43753	1	1	0.799145	NS
884	GGCTGAGGAAGCTGAGGAGG	GATTTAGGAAGCTGAGGTGGAGG	1576	2	0.126904	10857	28	0.257898	0.420577	0.700391	0.492069	NS
886	GGCTGAGGAAGCTGAGGAGG	GCAGGAGAAAGCTGAGGAGGTGG	363	2	0.550964	1947	5	0.256805	0.303395	0.563094	2.14545	NS
887	GGCTGAGGAAGCTGAGGAGG	GCCAGAGGAAGCTGTGGAAGTGG	1430	2	0.13986	10772	26	0.241367	0.766041	1	0.579451	NS
889	GGCTGAGGAAGCTGAGGAGG	GCCGGAGGAAGAGGAGGAGGAGG	106	1	0.943396	364	1	0.274725	0.400572	0.678274	3.43396	NS
892	GGCTGAGGAAGCTGAGGAGG	GCCTGAAGAAGCTGAGGTGGGGG	2203	3	0.136178	11367	16	0.140758	1	1	0.967459	NS
893	GGCTGAGGAAGCTGAGGAGG	GCCTGAGAAAGGAGAGGAGGAGG	447	0	0	664	2	0.301205	0.518642	0.804042	0	NS
895	GGCTGAGGAAGCTGAGGAGG	GCCTGAGGAAGCGGAGCCGGGGG	148	1	0.675676	452	0	0	0.246667	0.484206	10000000000	NS
898	GGCTGAGGAAGCTGAGGAGG	GCCTGAGGAAGCTGGGGTGGAGG	744	1	0.134409	4263	5	0.117288	1	1	1.14597	NS
900	GGCTGAGGAAGCTGAGGAGG	GCCTGAGGCAGCAGAGGAGTTGG	1232	0	0	9811	14	0.142697	0.390226	0.664751	0	NS
[truncated: 6,969 more rows]

## Sheet: Data 3.4 Summary of RGN OTs
#S3.4 Summary of RGN pOTs with significantly detectable indels caused by SpCas9. (NS, not significant)
[truncated: 112 more rows]

[truncated: 1 more sheets: Data 3.4 annotation of sig. OTs]
