# Supplementary material for: Massively Targeted Evaluation of Therapeutic CRISPR Off-Targets in Cells
Source: Research Square preprint supplement (doi:10.21203/rs.3.rs-1427273/v1), 2022-03-17
Supplement: Supplementary file 4 [file Supplementary Data 4.xlsx]

## Sheet: Guideline
			Guideline for supplementary Data 4
		Data 4.1 Overview of RGNs and corresponding OTs selected for targeted validation
		Data 4.2 SURRO-seq data for the selected RGNs and OTs
		Data 4.3 Deep sequencing data of the endogenous RGN ON and OTs in HEK293T cells, comparison of indel between MOCK and CRISPR edited cells included.
		Data 4.4 Deep sequencing data of the endogenous RGN ON and OTs in fibroblasts cells, comparison of indel between MOCK and CRISPR edited cells included.
		Data 4.5 Deep sequencing data of the endogenous RGN ON and OTs in PC9 cells, comparison of indel between MOCK and CRISPR edited cells included.
		Data 4.6 Deep sequencing data of the endogenous RGN ON and OTs in SKOV-3 cells, comparison of indel between MOCK and CRISPR edited cells included.
		Data 4.7 Deep sequencing data of the endogenous RGN ON and OTs in U2OS cells, comparison of indel between MOCK and CRISPR edited cells included.
		Data 4.8 Summary on-target indel frequency of the seven RGNs in five cell lines
		Data 4.9 Summary of indel frequency of the 23 OTs in the five cell lines
		Data 4.10 Comparison of OT indel detection between SURRO-seq and corresponding endogenous sites by deep sequencing

## Sheet: Data 4.1 Overview of OTs
RGN	ON	Sig. OTs	NS. OTs
RGN11179	1	2	0
RGN11237	1	2	0
RGN11189	1	4	0
RGN11184	1	3	0
RGN11208	1	0	3
VEGFA site 2	1	3	1
HEK293T site 4	1	2	3
Total	7	16	7

## Sheet: Data 4.2 SURRO-seq data
	Protospacer																				PAM			SURRO-seq		Fisher				SURRO-seq
RGN11179	A	A	G	G	T	G	A	A	C	G	T	G	G	A	T	G	A	A	G	T	T	G	G	IF%.Sp	IF%.WT			NGSlabel	SURRO-label	Total reads	indel reads	indel freq.	Fisher
ON	-	-	-	-	-	-	-	-	-	-	-	-	-	-	-	-	-	-	-	-	-	-	-	96.9	0.09	*		1	RGN11179-ON	14173	13734	96.9026	*
OT4708	G	-	-	-	-	-	-	-	A	-	-	-	-	-	A	-	-	-	-	-	G	-	-	19.4	0.97	*		2	OT4708	5868	121	2.06203	*
OT4729	-	-	-	-	-	-	-	-	G	-	-	-	-	-	G	-	-	C	-	C	-	-	-	2.06	0.1	*		3	OT4729	3774	732	19.3959	*
																												4	RGN11237-ON	18553	17775	95.8066	*
	Protospacer																				PAM			SURRO-seq				5	OT9490	851	120	14.1011	*
RGN11237	A	G	A	G	T	C	T	C	T	C	A	G	C	T	G	G	T	A	C	A	C	G	G	IF%.Sp	IF%.WT			6	OT9506	3274	834	25.4734	*
ON	-	-	-	-	-	-	-	-	-	-	-	-	-	-	-	-	-	-	-	-	-	-	-	95.81	0.33	*		7	RGN11189-ON	15098	14923	98.8409	*
OT9506	-	A	-	-	-	-	A	-	A	-	-	-	-	-	-	-	-	-	-	-	T	-	-	25.47	0.09	*		8	OT5595	1474	88	5.97015	*
OT9490	C	C	-	-	-	-	A	-	A	-	-	-	-	-	-	-	-	-	-	-	T	-	-	14.1	0.18	*		9	OT5600	3238	1460	45.0896	*
																												10	OT5675	1202	257	21.381	*
	Protospacer																				PAM			SURRO-seq				11	OT5679	2590	104	4.01544	*
RGN11189	A	G	C	C	A	G	T	G	C	C	A	G	A	A	G	A	G	C	C	A	A	G	G	IF%.Sp	IF%.WT			12	RGN11184-ON	10583	9980	94.3022	*
ON	-	-	-	-	-	-	-	-	-	-	-	-	-	-	-	-	-	-	-	-	-	-	-	98.84	0.18	*		13	OT5029	16993	1785	10.5043	*
OT5600	G	C	-	-	-	-	-	-	-	-	-	-	-	-	-	-	-	A	-	-	T	-	-	45.09	0.19	*		14	OT5032	16110	2873	17.8336	*
OT5675	C	A	-	-	-	-	-	-	-	-	-	-	G	-	-	-	-	-	-	T	C	-	-	21.38	0.22	*		15	OT5035	4545	160	3.52035	*
OT5595	C	A	-	-	-	-	-	C	-	-	-	-	-	-	-	-	-	-	-	T	G	-	-	5.97	0.23	*		16	RGN11208-ON	2455	1495	60.8961	*
OT5679	G	C	-	-	-	-	-	-	-	-	-	-	G	-	A	-	-	-	-	-	G	-	-	4.02	0	*		17	OT6791	24308	46	0.189238	ns
																												18	OT6832	24892	324	1.30162	ns
	Protospacer																				PAM			SURRO-seq				19	OT6873	2449020	2944	0.120211	ns
RGN11184	A	T	C	G	G	T	G	G	C	C	G	T	T	T	G	C	C	C	A	G	G	G	G	IF%.Sp	IF%.WT			29	VEGFA site 2-ON	8608	8350	97.0028	*
ON	-	-	-	-	-	-	-	-	-	-	-	-	-	-	-	-	-	-	-	-	-	-	-	94.3	1	*		30	OT11291	1548	1492	96.3824	*
OT5032	-	-	T	-	-	-	-	T	-	-	A	-	-	-	-	-	-	-	-	-	T	-	-	17.83	0.11	*		31	OT11290	2573	2458	95.5305	*
OT5029	-	-	-	T	-	-	-	A	-	-	A	-	-	-	-	-	-	-	-	-	A	-	-	10.5	0.07	*		32	OT11296	282	90	31.9149	*
OT5035	C	-	T	-	-	-	-	-	-	-	C	-	-	-	-	-	-	A	-	-	T	-	-	3.52	0.93	*		34	OT11510	4001	41	1.02474	ns
																												37	HEK293T site 4-ON	2261	2151	95.1349	*
	Protospacer																				PAM			SURRO-seq				38	OT11397	8880	4080	45.9459	*
RGN11208	A	T	T	C	T	T	T	C	A	A	C	T	A	G	A	A	T	A	A	A	A	G	G	IF%.Sp	IF%.WT			39	OT11398	3993	1554	38.9181	*
ON	-	-	-	-	-	-	-	-	-	-	-	-	-	-	-	-	-	-	-	-	-	-	-	60.9	1.26	*		40	OT11414	4860	20	0.411523	ns
OT6791	-	-	G	-	A	A	-	-	-	-	-	-	G	-	-	-	-	-	-	-	G	-	-	0.19	0.17	ns		42	OT11458	2215	5	0.225734	ns
OT6832	-	-	-	-	A	C	-	-	-	-	-	-	G	-	-	-	G	-	-	-	G	-	-	1.3	0.67	ns		43	OT11437	2413	4	0.165769	ns
OT6873	-	-	-	-	G	A	-	-	-	-	-	-	G	-	-	-	G	-	-	-	G	-	-	0.12	0.15	ns
	Protospacer																				PAM			SURRO-seq
VEGFA site 2	G	A	C	C	C	C	C	T	C	C	A	C	C	C	C	G	C	C	T	C	C	G	G	IF%.Sp	IF%.WT
ON	-	-	-	-	-	-	-	-	-	-	-	-	-	-	-	-	-	-	-	-	-	-	-	97	0.75	*
OT11291	A	T	T	-	-	-	-	C	-	-	-	-	-	-	-	-	-	-	-	-	A	-	-	96.38	2.21	*
OT11290	A	C	A	-	-	-	-	C	-	-	-	-	-	-	-	-	-	-	-	-	A	-	-	95.53	0.2	*
OT11296	A	G	G	-	-	-	-	C	A	-	-	-	-	-	-	-	-	-	-	-	A	-	-	31.91	0.15	*
OT11510	-	C	-	-	A	-	-	-	-	-	-	-	-	-	-	A	-	-	C	-	T	-	-	1.02	1.22	ns
	Protospacer																				PAM			SURRO-seq
HEK293T site 4	G	G	C	A	C	T	G	C	G	G	C	T	G	G	A	G	G	T	G	G	G	G	G	IF%.Sp	IF%.WT
ON	-	-	-	-	-	-	-	-	-	-	-	-	-	-	-	-	-	-	-	-	-	-	-	95.13	2.07	*
OT11397	A	-	-	-	G	-	-	-	-	-	-	-	A	-	-	-	-	-	-	-	T	-	-	45.95	0.2	*
OT11398	-	-	-	-	-	-	-	-	T	-	-	-	-	-	G	-	-	-	-	-	T	-	-	38.92	0.16	*
OT11414	-	A	G	G	-	-	-	-	-	-	-	-	-	-	G	-	-	-	-	-	A	-	-	0.41	0.54	ns
OT11458	-	-	-	C	-	-	-	-	-	-	-	-	T	-	G	-	-	-	A	-	-	-	-	0.23	0.71	ns
OT11437	-	-	-	T	-	-	-	-	A	-	-	-	-	T	-	-	-	A	-	-	A	-	-	0.17	0.16	ns

## Sheet: Data 4.3 HEK293T
	MOCK					HiFi-SpCas9					SpCas9					Odd Ratio 95% CI, HiFi-SpCas9					Odd Ratio 95% CI, SpCas10
NGS sample ID	Unmodified%	Modified%	Reads_total	Unmodified	Modified	Unmodified%	Modified%	Reads_total	Unmodified	Modified	Unmodified%	Modified%	Reads_total	Unmodified	Modified	HiFi-Spas 9 Odd.Ratio	SE(ln(OR)	95% C.I. for OR	95% C.I. for OR	Sig/NS	SpCas9 Odd.Ratio	SE(ln(OR)	95% C.I. for OR	95% C.I. for OR	Sig/NS
1	99.9722	0.0278193	143785	143745	40	39.6065	60.3935	144302	57153	87149	21.8095	78.1905	139916	30515	109401	5346.05	0.156289	3935.47	7262.2	1	12569.3	0.15633	9252.06	17075.8	1
2	99.9903	0.00972742	92522	92513	9	99.9863	0.0137356	65523	65514	9	99.9878	0.0121502	82303	82293	10	1.4121	0.447243	0.587714	3.39287	0	1.23661	0.436958	0.525153	2.91191	0
3	99.9975	0.00250583	79814	79812	2	99.9868	0.0131615	75979	75969	10	99.8743	0.125712	91479	91364	115	3.85215	0.651359	1.07462	13.8086	1	33.7777	0.584788	10.7361	106.27	1
4	99.9606	0.0394217	101467	101427	40	4.51449	95.4855	106147	4792	101355	2.48429	97.5157	95963	2384	93579	52313.8	0.156903	38464.3	71150	1	97066.3	0.157576	71275.1	132190	1
5	99.9219	0.0780669	107600	107516	84	99.923	0.076963	127334	127236	98	99.5826	0.41744	97020	96615	405	0.984192	0.147929	0.736479	1.31522	0	5.31539	0.119363	4.20661	6.71643	1
6	99.968	0.0320248	37471	37459	12	99.8633	0.136747	42414	42356	58	69.1867	30.8133	38438	26594	11844	4.01376	0.306468	2.20131	7.3185	1	1283.39	0.277618	744.811	2211.43	1
7	99.4979	0.502092	1195	1189	6	3.62173	96.3783	15904	576	15328	3.81313	96.1869	12693	484	12209	4516.34	0.381439	2138.45	9538.38	1	4279.79	0.381892	2024.65	9046.81	1
8	99.9968	0.00323746	154442	154437	5	99.9803	0.019651	162842	162810	32	99.3966	0.603388	177995	176921	1074	5.21715	0.443827	2.18595	12.4516	1	156.397	0.409401	70.1036	348.914	1
9	99.992	0.00798067	137833	137822	11	99.9115	0.0885073	120894	120787	107	93.7766	6.22341	169007	158489	10518	10.2693	0.304316	5.6559	18.6457	1	762.277	0.288863	432.741	1342.76	1
10	99.9509	0.0490842	38709	38690	19	99.7885	0.211508	34514	34441	73	98.3589	1.64105	37476	36861	615	4.15646	0.252128	2.53576	6.81301	1	32.3282	0.227324	20.7052	50.4759	1
11	99.9986	0.00144889	138037	138035	2	99.9404	0.0596049	23488	23474	14	99.8383	0.161652	59387	59291	96	29.4006	0.632495	8.51072	101.566	1	75.2743	0.586231	23.8582	237.496	1
12	99.9507	0.0493426	131732	131667	65	9.51183	90.4882	139563	13275	126288	8.53466	91.4653	134815	11506	123309	18977.3	0.12346	14898.5	24172.7	1	21378.3	0.123508	16781.9	27233.6	1
13	99.9982	0.00182266	219460	219456	4	99.9876	0.0124238	160981	160961	20	98.041	1.95896	194593	190781	3812	5.72632	0.497624	2.15918	15.1866	1	877.221	0.447518	364.9	2108.84	1
14	99.9901	0.00992608	171266	171249	17	99.857	0.14305	190843	190570	273	66.0186	33.9814	138608	91507	47101	13.6789	0.243344	8.49011	22.0389	1	4897.09	0.235783	3084.86	7773.93	1
15	99.9972	0.00280431	106978	106975	3	99.9991	0.00091332	109491	109490	1	100	0	90768	90768	0	0.488515	0.866036	0.0894732	2.66724	0	0.294638	1.11804	0.03293	2.63625	0
16	99.9185	0.081471	187797	187644	153	82.545	17.455	137336	113364	23972	20.0423	79.9577	132350	26526	105824	257.668	0.0809282	219.873	301.958	1	4860.9	0.0809072	4148.08	5696.21	1
17	99.7486	0.251407	123704	123393	311	99.7366	0.263435	115019	114716	303	99.7482	0.251761	123530	123219	311	1.04806	0.0806934	0.894742	1.22765	0	1.00141	0.0801653	0.855805	1.17179	0
18	99.9941	0.00593683	50532	50529	3	99.9925	0.0074903	66753	66748	5	99.9837	0.0162927	67515	67504	11	1.13552	0.645524	0.320416	4.02418	0	2.24561	0.57738	0.7242	6.96323	0
19	99.2433	0.756667	132555	131552	1003	99.2224	0.777557	129251	128246	1005	99.2636	0.736366	135802	134802	1000	1.02782	0.0447823	0.941452	1.12211	0	0.972975	0.0448334	0.891125	1.06234	0
29	99.7033	0.296692	40783	40662	121	4.16358	95.8364	25627	1067	24560	4.02874	95.9713	13081	527	12554	7665.04	0.0959081	6351.49	9250.24	1	7925.42	0.10097	6502.42	9659.83	1
30	99.9133	0.0867015	39215	39181	34	13.5714	86.4286	30358	4120	26238	14.1473	85.8527	3407	482	2925	7127.93	0.169934	5108.72	9945.22	1	6781.81	0.176094	4802.32	9577.23	1
31	99.8967	0.103313	144222	144073	149	10.2327	89.7673	116392	11910	104482	8.47758	91.5224	76661	6499	70162	8425.42	0.0822626	7170.81	9899.54	1	10367.9	0.0827146	8816.19	12192.6	1
32	99.9987	0.00130163	76827	76826	1	99.8243	0.175727	88774	88618	156	91.2704	8.72957	73715	67280	6435	68.0545	0.711613	16.8702	274.533	1	3674.58	0.707236	918.747	14696.7	1
34	99.9558	0.0441538	190244	190160	84	99.971	0.0290385	206622	206562	60	99.9548	0.0451838	168202	168126	76	0.660663	0.167834	0.475463	0.918001	0	1.0246	0.157362	0.752673	1.39478	0
37	99.8398	0.160173	42454	42386	68	NA	NA	630	NA	NA	4.53135	95.4687	66382	3008	63374	#VALUE!	#VALUE!	#VALUE!	#VALUE!	#VALUE!	12938.4	0.12192	10188.2	16430.8	1
38	99.9934	0.00663643	45205	45202	3	99.6864	0.313598	15944	15894	50	22.9933	77.0067	30087	6918	23169	36.2591	0.51932	13.1028	100.339	1	37843.4	0.50021	14197.2	100874	1
39	99.7347	0.265307	91592	91349	243	99.736	0.264026	6060	6044	16	98.0012	1.99877	3252	3187	65	1.05286	0.251194	0.643504	1.72263	0	7.75076	0.139909	5.89185	10.1962	1
40	99.8917	0.108282	178239	178046	193	99.9189	0.0810785	271342	271122	220	99.5362	0.463752	279244	277949	1295	0.748099	0.0984319	0.616839	0.907289	0	4.27929	0.0770419	3.67953	4.97681	1
42	99.9822	0.0178013	67411	67399	12	99.9845	0.0155117	70914	70903	11	99.9854	0.0145855	102842	102827	15	0.877459	0.400357	0.400347	1.92317	0	0.806724	0.373427	0.388023	1.67723	0
43	99.9993	0.00066161	151146	151145	1	99.9995	0.00051909	192645	192644	1	99.9995	0.00051176	195406	195405	1	0.784583	1.00001	0.110514	5.57008	0	0.773497	1.00001	0.108952	5.49137	0
																Note. Introduction of +1 read to enable calculation with 0 value

## Sheet: Data 4.4 Fibroblast
	MOCK					HiFi-SpCas9					SpCas9					Odd Ratio 95% CI, HiFi-SpCas9					Odd Ratio 95% CI, SpCas10
NGS sample ID	Unmodified%	Modified%	Reads_total	Unmodified	Modified	Unmodified%	Modified%	Reads_total	Unmodified	Modified	Unmodified%	Modified%	Reads_total	Unmodified	Modified	HiFi-Spas 9 Odd.Ratio	SE(ln(OR)	95% C.I. for OR	95% C.I. for OR	Sig/NS	SpCas9 Odd.Ratio	SE(ln(OR)	95% C.I. for OR	95% C.I. for OR	Sig/NS
1	99.2101	0.789898	110394	109522	872	65.164	34.836	109381	71277	38104	80.7652	19.2348	151278	122180	29098	67.0683	0.034567	62.6749	71.7698	1	29.879	0.0345999	27.9199	31.9755	1
2	99.9832	0.0168183	65405	65394	11	99.9873	0.0126931	55148	55141	7	99.9927	0.00729031	82301	82295	6	0.790625	0.456472	0.323157	1.93432	0	0.463535	0.475624	0.182483	1.17745	0
3	100	0	65565	65565	0	100	0	67501	67501	0	100	0	83982	83982	0	0.971319	1.41422	0.0607505	15.5301	0	0.780706	1.41422	0.0488288	12.4824	0
4	98.8958	1.10417	94822	93775	1047	2.32202	97.678	90137	2093	88044	3.0375	96.9625	96362	2927	93435	3762.34	0.0381284	3491.43	4054.28	1	2855.44	0.0362918	2659.39	3065.96	1
5	99.9231	0.0768792	120969	120876	93	NA	NA	3	NA	NA	99.7783	0.221747	127172	126890	282	#VALUE!	#VALUE!	#VALUE!	#VALUE!	#VALUE!	2.86795	0.119113	2.27081	3.62212	1
6	99.7129	0.287112	37616	37508	108	99.9741	0.0259168	46302	46290	12	96.6698	3.33023	40778	39420	1358	0.0966397	0.293506	0.0543649	0.171788	0	11.8632	0.0998107	9.75529	14.4265	1
7	82.7009	17.2991	896	741	155	4.28261	95.7174	9667	414	9253	4.12673	95.8733	13982	577	13405	106.062	0.101369	86.9508	129.374	1	110.319	0.0977889	91.0775	133.626	1
8	99.9848	0.0152195	157693	157669	24	99.9928	0.00717116	167337	167325	12	99.1587	0.841306	177581	176087	1494	0.489992	0.341958	0.250673	0.957789	0	53.5452	0.201695	36.0607	79.5073	1
9	99.8754	0.124606	95501	95382	119	99.7956	0.204422	125231	124975	256	87.8764	12.1236	153304	134718	18586	1.63454	0.110648	1.31586	2.0304	1	109.666	0.091679	91.6287	131.253	1
10	99.9445	0.0555007	32432	32414	18	99.964	0.0359732	36138	36125	13	99.7605	0.239484	38416	38324	92	0.661151	0.352305	0.331446	1.31883	0	4.13993	0.251875	2.52693	6.78256	1
11	100	0	98942	98942	0	100	0	31911	31911	0	100	0	107712	107712	0	3.1005	1.41423	0.193917	49.5731	0	0.91858	1.41422	0.0574524	14.6867	0
12	99.1318	0.868213	140864	139641	1223	17.8407	82.1593	158985	28364	130621	23.7826	76.2174	136894	32557	104337	525.374	0.029446	495.91	556.587	1	365.611	0.0294016	345.138	387.299	1
13	99.9708	0.029181	116514	116480	34	99.9994	0.00058318	171473	171472	1	99.3109	0.689079	145992	144986	1006	0.0388169	0.727039	0.00933583	0.161395	0	23.1147	0.171988	16.5002	32.3807	1
14	99.7257	0.274337	176790	176305	485	99.987	0.0130108	153718	153698	20	96.0755	3.92448	175488	168601	6887	0.0495655	0.22291	0.032021	0.0767227	0	14.8204	0.0470574	13.5147	16.2524	1
15	100	0	64331	64331	0	100	0	84005	84005	0	100	0	82677	82677	0	0.765802	1.41422	0.0478967	12.2441	0	0.778103	1.41422	0.048666	12.4408	0
16	99.2994	0.700627	142872	141871	1001	93.8125	6.18755	151821	142427	9394	55.9057	44.0943	140499	78547	61952	9.33965	0.0334442	8.74706	9.97238	1	111.675	0.0321547	104.854	118.94	1
17	99.705	0.295005	120337	119982	355	99.716	0.284008	136968	136579	389	99.6703	0.329741	111906	111537	369	0.962381	0.0734081	0.833414	1.11131	0	1.11802	0.0743572	0.966395	1.29343	0
18	99.9952	0.00483224	62083	62080	3	99.9939	0.00611079	98187	98181	6	99.9968	0.0032467	61601	61599	2	1.10653	0.626804	0.323906	3.78017	0	0.755856	0.763784	0.169158	3.37742	0
19	99.2717	0.728314	138951	137939	1012	99.2638	0.736168	143038	141985	1053	99.2672	0.732796	116267	115415	852	1.01082	0.0441614	0.927011	1.10222	0	1.00638	0.0466413	0.918463	1.10272	0
29	99.4917	0.508274	66893	66553	340	51.471	48.529	32156	16551	15605	28.6752	71.3248	35121	10071	25050	184.018	0.0554263	165.075	205.135	1	485.433	0.0555588	435.348	541.28	1
30	99.6198	0.380192	10521	10481	40	34.7734	65.2266	9398	3268	6130	24.5455	75.4545	4290	1053	3237	479.487	0.15797	351.811	653.497	1	785.41	0.160447	573.484	1075.65	1
31	99.5049	0.495079	148865	148128	737	73.3842	26.6158	139064	102051	37013	66.1201	33.8799	142294	94085	48209	72.7995	0.0373976	67.6542	78.3361	1	102.848	0.0373247	95.5926	110.654	1
32	99.9362	0.0637821	87799	87743	56	100	0	80063	80063	0	99.5374	0.462625	91651	91227	424	0.0192267	1.00875	0.00266222	0.138857	0	7.17139	0.141135	5.43834	9.45671	1
34	99.9354	0.0645692	168811	168702	109	99.9665	0.0334714	167307	167251	56	99.9694	0.0306279	176310	176256	54	0.522677	0.163238	0.379562	0.719755	0	0.478571	0.16518	0.346212	0.661531	0
37	98.7206	1.27942	61825	61034	791	30.1578	69.8422	73278	22099	51179	27.122	72.878	47880	12986	34894	178.469	0.0366579	166.096	191.763	1	207.066	0.0372111	192.501	222.732	1
38	99.7649	0.235147	76548	76368	180	99.9346	0.0654438	55009	54973	36	81.7683	18.2317	32652	26699	5953	0.283977	0.180508	0.199357	0.404515	0	94.0884	0.075785	81.1011	109.155	1
39	99.717	0.283	87279	87032	247	99.7798	0.220176	19984	19940	44	98.7988	1.20117	20813	20563	250	0.79195	0.162222	0.576251	1.08839	0	4.2835	0.089869	3.5917	5.10854	1
40	99.9121	0.0878792	260585	260356	229	99.922	0.0779563	262968	262763	205	99.7861	0.213864	220701	220229	472	0.887448	0.0959679	0.735281	1.07111	0	2.43123	0.0804386	2.07661	2.84641	1
42	99.9872	0.0127586	109730	109716	14	99.9894	0.0106467	150282	150266	16	99.985	0.0149801	106808	106792	16	0.8275	0.354268	0.413246	1.65702	0	1.16436	0.354272	0.581469	2.33158	0
43	99.9995	0.00052285	191261	191260	1	99.9987	0.00132107	227089	227086	3	99.9995	0.00049401	202427	202426	1	1.68447	0.866031	0.30852	9.19697	0	0.944839	1.00001	0.133087	6.70779	0
																Note. Introduction of +1 read to enable calculation with 0 value

## Sheet: Data 4.5 PC9
	MOCK					HiFi-SpCas9					SpCas9					Odd Ratio 95% CI, HiFi-SpCas9					Odd Ratio 95% CI, SpCas10
NGS sample ID	Unmodified%	Modified%	Reads_total	Unmodified	Modified	Unmodified%	Modified%	Reads_total	Unmodified	Modified	Unmodified%	Modified%	Reads_total	Unmodified	Modified	HiFi-Spas 9 Odd.Ratio	SE(ln(OR)	95% C.I. for OR	95% C.I. for OR	Sig/NS	SpCas9 Odd.Ratio	SE(ln(OR)	95% C.I. for OR	95% C.I. for OR	Sig/NS
1	99.343	0.657036	106539	105839	700	49.1378	50.8622	90462	44451	46011	17.7082	82.2918	107425	19023	88402	156.283	0.0384735	144.931	168.524	1	701.612	0.038728	650.326	756.943	1
2	99.9848	0.015153	79192	79180	12	99.9934	0.00657341	76064	76059	5	99.9862	0.0138343	72284	72274	10	0.480477	0.493574	0.182614	1.26419	0	0.927005	0.409706	0.415273	2.06933	0
3	100	0	84894	84894	0	100	0	66364	66364	0	99.9779	0.0220607	95192	95171	21	1.27921	1.41422	0.0800077	20.4529	0	19.6244	1.02249	2.64508	145.597	1
4	98.9745	1.0255	95271	94294	977	4.68561	95.3144	85069	3986	81083	3.72197	96.278	98335	3660	94675	1960.82	0.0360034	1827.22	2104.19	1	2493.39	0.0362879	2322.21	2677.19	1
5	99.9274	0.0726287	103265	103190	75	99.9003	0.0997133	112322	112210	112	99.7127	0.287298	127046	126681	365	1.36732	0.148412	1.02221	1.82895	1	3.92278	0.126126	3.06361	5.0229	1
6	99.9305	0.069541	43140	43110	30	99.955	0.0450477	33298	33283	15	87.2342	12.7658	38556	33634	4922	0.668515	0.307914	0.365602	1.2224	0	203.547	0.180317	142.947	289.837	1
7	NA	NA	613	NA	NA	2.95822	97.0418	13116	388	12728	3.68359	96.3164	11049	407	10642	#VALUE!	#VALUE!	#VALUE!	#VALUE!	#VALUE!	#VALUE!	#VALUE!	#VALUE!	#VALUE!	#VALUE!
8	99.9959	0.00408842	146756	146750	6	99.9952	0.00477073	146728	146721	7	99.7542	0.245807	146863	146502	361	1.14308	0.517562	0.414496	3.15236	0	51.8018	0.381619	24.5191	109.442	1
9	99.9706	0.0293682	146417	146374	43	99.7337	0.266347	150931	150529	402	93.4259	6.57409	148857	139071	9786	8.90628	0.158815	6.52395	12.1586	1	234.112	0.151141	174.089	314.831	1
10	99.9496	0.0503618	37727	37708	19	99.6982	0.301778	39433	39314	119	99.2464	0.753622	42727	42405	322	5.7549	0.24163	3.58392	9.24098	1	14.3612	0.230534	9.14019	22.5645	1
11	100	0	109448	109448	0	99.9778	0.0221849	31553	31546	7	99.8381	0.16187	45098	45025	73	27.7552	1.06068	3.47116	221.928	1	179.879	1.00675	25.0045	1294.03	1
12	99.0821	0.917921	112319	111288	1031	19.2715	80.7285	116452	22442	94010	26.0681	73.9319	138940	36219	102721	451.721	0.032143	424.14	481.095	1	305.835	0.0318641	287.319	325.545	1
13	99.9949	0.00510527	97938	97933	5	100	0	133852	133852	0	99.5554	0.444641	162828	162104	724	0.121942	1.08013	0.01468	1.01293	0	73.0002	0.409954	32.6862	163.036	1
14	99.9593	0.040727	164510	164443	67	99.9684	0.0316043	145550	145504	46	92.9002	7.0998	172343	160107	12236	0.78114	0.189725	0.538558	1.13299	0	184.829	0.121655	145.618	234.599	1
15	99.9987	0.00129036	77498	77497	1	99.9989	0.00113644	87994	87993	1	100	0	47721	47721	0	0.880719	1.00001	0.124054	6.25266	0	0.811974	1.22476	0.0736218	8.95525	0
16	99.6304	0.369557	130697	130214	483	86.8204	13.1796	120565	104675	15890	43.834	56.166	150082	65787	84295	40.8432	0.0463279	37.2979	44.7255	1	344.728	0.0458351	315.109	377.13	1
17	99.5745	0.425496	106934	106479	455	99.5789	0.421089	108528	108071	457	99.5948	0.405152	115759	115290	469	0.98959	0.066295	0.869008	1.1269	0	0.951931	0.0658689	0.836637	1.08311	0
18	99.9908	0.0091792	54471	54466	5	99.9903	0.00965922	51764	51759	5	99.9934	0.00663306	75380	75375	5	1.0523	0.577383	0.33936	3.263	0	0.722604	0.577378	0.233038	2.24065	0
19	99.2932	0.706816	107666	106905	761	99.2657	0.734295	108131	107337	794	99.5357	0.464324	6461	6431	30	1.03911	0.0508809	0.940481	1.14808	0	0.676181	0.183672	0.471757	0.969186	0
29	99.1862	0.813835	60946	60450	496	3.66454	96.3355	27425	1005	26420	4.39639	95.6036	32231	1417	30814	3194.47	0.0553218	2866.21	3560.32	1	2643.22	0.0525955	2384.31	2930.24	1
30	99.2475	0.752545	18072	17936	136	20.1028	79.8972	24315	4888	19427	25.5387	74.4613	9049	2311	6738	520.28	0.0872412	438.507	617.303	1	381.625	0.0890839	320.485	454.43	1
31	99.0791	0.920923	152130	150729	1401	11.1362	88.8638	153715	17118	136597	11.2903	88.7097	140147	15823	124324	857.862	0.0280292	812.005	906.31	1	844.683	0.0281272	799.377	892.558	1
32	99.9966	0.00338413	88649	88646	3	99.9978	0.00217313	92033	92031	2	98.9704	1.02958	85763	84880	883	0.722414	0.763777	0.161676	3.22795	0	230.805	0.501153	86.4283	616.362	1
34	99.9598	0.0402444	191331	191254	77	99.9558	0.0442273	194450	194364	86	99.9623	0.0377266	188196	188125	71	1.09754	0.155965	0.808461	1.48998	0	0.93843	0.163462	0.681177	1.29284	0
37	98.6815	1.3185	59310	58528	782	6.92913	93.0709	74194	5141	69053	5.36074	94.6393	68442	3669	64773	1003.84	0.0387709	930.387	1083.1	1	1319.3	0.0397762	1220.35	1426.27	1
38	99.8256	0.174397	62501	62392	109	99.59	0.409981	45124	44939	185	26.1299	73.8701	37459	9788	27671	2.34759	0.120439	1.85397	2.97264	1	1603.41	0.0961521	1328	1935.94	1
39	99.7608	0.239215	73992	73815	177	99.7384	0.261605	17966	17919	47	98.9877	1.01227	7903	7823	80	1.11079	0.162852	0.807257	1.52847	0	4.29325	0.134555	3.298	5.58885	1
40	99.9121	0.0878745	259461	259233	228	99.9136	0.0864461	286884	286636	248	99.7661	0.233947	277413	276764	649	0.983385	0.0915982	0.821776	1.17678	0	2.65863	0.0768944	2.28668	3.0911	1
42	99.9844	0.0155523	141458	141436	22	99.9884	0.0115539	155791	155773	18	99.9767	0.0233469	158479	158442	37	0.750056	0.310038	0.408493	1.37722	0	1.47484	0.264211	0.878709	2.47541	0
43	99.9986	0.00137745	217793	217790	3	99.9978	0.00218734	228588	228583	5	99.9992	0.00083408	239785	239783	2	1.42917	0.645504	0.403293	5.06465	0	0.68121	0.763768	0.152457	3.04378	0
																Note. Introduction of +1 read to enable calculation with 0 value

## Sheet: Data 4.6 SKOV-3
	MOCK					HiFi-SpCas9					SpCas9					Odd Ratio 95% CI, HiFi-SpCas9					Odd Ratio 95% CI, SpCas10
NGS sample ID	Unmodified%	Modified%	Reads_total	Unmodified	Modified	Unmodified%	Modified%	Reads_total	Unmodified	Modified	Unmodified%	Modified%	Reads_total	Unmodified	Modified	HiFi-Spas 9 Odd.Ratio	SE(ln(OR)	95% C.I. for OR	95% C.I. for OR	Sig/NS	SpCas9 Odd.Ratio	SE(ln(OR)	95% C.I. for OR	95% C.I. for OR	Sig/NS
1	99.3343	0.665685	107258	106544	714	47.0843	52.9157	127189	59886	67303	52.6785	47.3215	126602	66692	59910	167.469	0.0379413	155.467	180.398	1	133.861	0.037943	124.267	144.195	1
2	99.9945	0.00554854	72091	72087	4	99.9804	0.0196359	35649	35642	7	99.9876	0.0123631	56620	56613	7	3.236	0.570124	1.05854	9.89255	1	2.03732	0.570115	0.666449	6.22804	0
3	100	0	70412	70412	0	99.9987	0.00133951	74654	74653	1	99.9491	0.0508676	70772	70736	36	1.88638	1.22476	0.171039	20.8048	0	36.8305	1.01344	5.05304	268.45	1
4	99.0541	0.945913	114704	113619	1085	4.7862	95.2138	93310	4466	88844	4.75882	95.2412	97272	4629	92643	2080.86	0.0341282	1946.22	2224.81	1	2093.44	0.0340057	1958.46	2237.73	1
5	99.9207	0.0792798	131181	131077	104	99.9329	0.0670691	110334	110260	74	99.8864	0.113571	119749	119613	136	0.849141	0.151241	0.631307	1.14214	0	1.42981	0.129765	1.10872	1.8439	1
6	99.9251	0.0748783	37394	37366	28	99.9446	0.0554	34296	34277	19	96.3887	3.61126	47158	45455	1703	0.751804	0.290755	0.425215	1.32923	0	48.3024	0.187399	33.4543	69.7406	1
7	85.4806	14.5194	1467	1254	213	4.70755	95.2925	13404	631	12773	4.52962	95.4704	17794	806	16988	118.533	0.0844409	100.453	139.868	1	123.459	0.0822662	105.075	145.061	1
8	99.9929	0.00707546	155467	155456	11	99.9931	0.00685077	160566	160555	11	99.7459	0.254074	177901	177449	452	0.968242	0.408264	0.434973	2.15529	0	33.0713	0.292494	18.6413	58.6715	1
9	99.9639	0.0361051	135715	135666	49	99.831	0.169017	134898	134670	228	97.8453	2.15468	139464	136459	3005	4.61387	0.156146	3.39744	6.26585	1	59.7706	0.142644	45.1925	79.0513	1
10	99.9737	0.0262812	38050	38040	10	99.9145	0.0855281	33907	33878	29	99.7495	0.250526	34727	34640	87	3.06232	0.35256	1.53442	6.1116	1	8.7852	0.319887	4.69308	16.4454	1
11	99.9992	0.00079623	125592	125591	1	100	0	133397	133397	0	100	0	75922	75922	0	0.470742	1.22475	0.0426828	5.19173	0	0.827101	1.22475	0.0749942	9.122	0
12	98.81	1.19001	107646	106365	1281	10.5148	89.4852	115780	12174	103606	12.4294	87.5706	136427	16957	119470	706.049	0.0296854	666.141	748.348	1	584.524	0.0292707	551.934	619.04	1
13	99.9976	0.00241765	165450	165446	4	99.9989	0.00108703	183988	183986	2	99.8116	0.1884	191614	191253	361	0.539539	0.730305	0.128936	2.25772	0	62.6307	0.450304	25.9108	151.389	1
14	99.9385	0.0614861	139869	139783	86	99.9594	0.0406366	150111	150050	61	96.6116	3.38839	153052	147866	5186	0.663882	0.166244	0.479271	0.919604	0	56.3616	0.108171	45.5938	69.6723	1
15	99.9992	0.00083683	119498	119497	1	100	0	115903	115903	0	99.9991	0.000927	107875	107874	1	0.515504	1.22475	0.0467415	5.68541	0	1.10775	1.00001	0.156033	7.86438	0
16	99.7093	0.290718	143094	142678	416	91.1977	8.80235	143723	131072	12651	82.1332	17.8668	144525	118703	25822	33.0271	0.0499175	29.9488	36.4217	1	74.433	0.0495201	67.5481	82.0196	1
17	99.678	0.321983	100316	99993	323	99.6639	0.336141	105908	105552	356	99.6598	0.340249	105511	105152	359	1.04382	0.0768571	0.897851	1.21352	0	1.0566	0.0767053	0.909111	1.22801	0
18	99.9847	0.0153053	65337	65327	10	99.9936	0.0064118	62385	62381	4	99.9958	0.00417868	47862	47860	2	0.476011	0.539389	0.165379	1.37011	0	0.37226	0.651367	0.103846	1.33445	0
19	99.2648	0.73524	95207	94507	700	99.2875	0.712493	125475	124581	894	99.2073	0.792661	114677	113768	909	0.968542	0.0506207	0.877059	1.06957	0	1.07837	0.0504461	0.976849	1.19044	0
29	99.1509	0.849077	55472	55001	471	5.59447	94.4055	31835	1781	30054	4.00575	95.9942	29208	1170	28038	1965.38	0.0522615	1774.02	2177.37	1	2790.24	0.0550133	2505.04	3107.92	1
30	99.6371	0.362866	27834	27733	101	15.3608	84.6392	25142	3862	21280	21.0988	78.9012	8555	1805	6750	1497.89	0.100727	1229.53	1824.82	1	1016.4	0.102673	831.123	1242.97	1
31	99.1382	0.861847	143529	142292	1237	32.1851	67.8149	128606	41392	87214	30.1722	69.8278	143725	43365	100360	242.174	0.0291617	228.72	256.419	1	265.998	0.0291171	251.243	281.62	1
32	99.9566	0.0433851	78368	78334	34	99.9675	0.0325497	82950	82923	27	95.3589	4.64107	69359	66140	3219	0.755728	0.253595	0.459728	1.24231	0	108.961	0.170029	78.0803	152.056	1
34	99.9537	0.0462912	164178	164102	76	99.962	0.038013	155210	155151	59	99.9513	0.0487289	180591	180503	88	0.824175	0.172239	0.58804	1.15513	0	1.05082	0.155675	0.77449	1.42575	0
37	98.4987	1.50126	65345	64364	981	6.26905	93.7309	39033	2447	36586	4.76529	95.2347	68999	3288	65711	979.611	0.0383366	908.701	1056.05	1	1309.54	0.0367849	1218.45	1407.44	1
38	99.6425	0.357529	63771	63543	228	99.6944	0.305629	72310	72089	221	55.3681	44.6319	45649	25275	20374	0.85451	0.0943447	0.710247	1.02808	0	223.681	0.066867	196.205	255.004	1
39	99.6734	0.326579	100129	99802	327	99.7157	0.284283	90051	89795	256	95.8488	4.15119	38230	36643	1587	0.870855	0.0834325	0.73948	1.02557	0	13.1861	0.0609575	11.7012	14.8595	1
40	99.8997	0.100286	228346	228117	229	99.881	0.118954	233704	233426	278	99.753	0.246993	214986	214455	531	1.18545	0.0891107	0.995479	1.41168	0	2.4604	0.078972	2.10757	2.87228	1
42	99.9812	0.0187735	90553	90536	17	99.978	0.0220438	86192	86173	19	99.99	0.0100364	119565	119553	12	1.16737	0.324928	0.61748	2.20695	0	0.546931	0.364003	0.267971	1.11629	0
43	100	0	175540	175540	0	100	0	182466	182466	0	99.999	0.00104777	190881	190879	2	0.962042	1.41422	0.0601711	15.3816	0	2.75892	1.15471	0.286969	26.5243	0
																Note. Introduction of +1 read to enable calculation with 0 value

## Sheet: Data 4.7 U2OS
	MOCK					HiFi-SpCas9					SpCas9					Odd Ratio 95% CI, HiFi-SpCas9					Odd Ratio 95% CI, SpCas10
NGS sample ID	Unmodified%	Modified%	Reads_total	Unmodified	Modified	Unmodified%	Modified%	Reads_total	Unmodified	Modified	Unmodified%	Modified%	Reads_total	Unmodified	Modified	HiFi-Spas 9 Odd.Ratio	SE(ln(OR)	95% C.I. for OR	95% C.I. for OR	Sig/NS	SpCas9 Odd.Ratio	SE(ln(OR)	95% C.I. for OR	95% C.I. for OR	Sig/NS
1	99.8982	0.101843	142376	142231	145	31.9459	68.0541	142494	45521	96973	26.5806	73.4194	118677	31545	87132	2075.29	0.0829977	1763.72	2441.9	1	2690.81	0.0830634	2286.54	3166.56	1
2	99.9836	0.0164443	91217	91202	15	99.9848	0.0152116	78887	78875	12	99.9948	0.00515869	77539	77535	4	0.93948	0.373426	0.451878	1.95323	0	0.367583	0.512371	0.134653	1.00345	0
3	100	0	86777	86777	0	100	0	73824	73824	0	99.9091	0.0908933	74813	74745	68	1.17546	1.41422	0.0735183	18.7939	0	80.1071	1.00723	11.1249	576.826	1
4	99.7796	0.22041	88925	88729	196	3.10588	96.8941	91182	2832	88350	2.40275	97.5973	92519	2223	90296	14046.5	0.0738357	12154	16233.8	1	18287	0.0744858	15803	21161.5	1
5	99.9554	0.0445899	105405	105358	47	99.9517	0.0483321	128279	128217	62	99.3113	0.688747	114701	113911	790	1.0785	0.191634	0.740798	1.57016	0	15.2418	0.148714	11.3881	20.3998	1
6	99.9305	0.0695018	46042	46010	32	99.7718	0.228195	41631	41536	95	54.53	45.47	34172	18634	15538	3.22243	0.201905	2.1693	4.78684	1	1162.63	0.174479	825.89	1636.67	1
7	98.0377	1.96226	1325	1299	26	2.69239	97.3076	18088	487	17601	3.3078	96.6922	19711	652	19059	1736.69	0.199781	1173.99	2569.08	1	1405.37	0.198469	952.464	2073.62	1
8	99.9966	0.00341108	146581	146576	5	99.9928	0.00718025	139271	139261	10	99.515	0.485009	145358	144653	705	1.92963	0.507533	0.713598	5.2179	0	119.231	0.409996	53.3818	266.308	1
9	99.957	0.0430054	160445	160376	69	99.6803	0.319732	135426	134993	433	70.0538	29.9462	173107	121268	51839	7.36579	0.128855	5.72184	9.48206	1	979.398	0.119664	774.639	1238.28	1
10	99.9542	0.0458365	32725	32710	15	99.8401	0.159868	38782	38720	62	98.9086	1.09137	52503	51930	573	3.32635	0.280053	1.92124	5.75908	1	22.5974	0.253559	13.7476	37.1443	1
11	100	0	85777	85777	0	99.9888	0.0111719	8951	8950	1	99.9978	0.00221195	45209	45208	1	19.1661	1.2248	1.73767	211.398	1	3.79473	1.22476	0.344069	41.852	0
12	99.8743	0.125654	139271	139096	175	7.22611	92.7739	130499	9430	121069	58.5464	41.4536	109110	63880	45230	10145.7	0.0761794	8738.54	11779.6	1	559.59	0.0756754	482.451	649.061	1
13	99.9961	0.00385027	233750	233741	9	99.9991	0.00094459	211732	211730	2	98.811	1.18899	158790	156902	1888	0.331187	0.658287	0.091144	1.20343	0	281.409	0.31708	151.159	523.892	1
14	99.9643	0.0356852	170939	170878	61	99.8289	0.171057	171873	171579	294	75.1852	24.8148	130648	98228	32420	4.73863	0.139752	3.60324	6.23177	1	909.67	0.127185	708.96	1167.2	1
15	99.9974	0.00264128	75721	75719	2	100	0	101341	101341	0	100	0	126252	126252	0	0.249058	1.15471	0.0259054	2.39447	0	0.199916	1.15471	0.020794	1.92201	0
16	99.8856	0.114378	167865	167673	192	73.8798	26.1202	151385	111843	39542	60.4343	39.5657	124014	74947	49067	307.16	0.0722602	266.598	353.895	1	568.783	0.0722567	493.674	655.319	1
17	99.7528	0.247159	98722	98478	244	99.7537	0.246337	108388	108121	267	99.7479	0.252146	120565	120261	304	0.996319	0.0885007	0.837655	1.18504	0	1.01941	0.0858999	0.861449	1.20634	0
18	99.9945	0.00553108	54239	54236	3	99.9957	0.00428908	69945	69942	3	99.9895	0.0105269	94995	94985	10	0.775446	0.70713	0.193923	3.10079	0	1.57025	0.583899	0.49997	4.93167	0
19	99.1894	0.81062	110286	109392	894	99.1093	0.890722	123383	122284	1099	99.1456	0.854429	119378	118358	1020	1.09948	0.0452076	1.00625	1.20134	1	1.05436	0.045982	0.963497	1.1538	0
29	99.5069	0.493065	40157	39959	198	6.92297	93.077	13968	967	13001	5.26625	94.7338	18742	987	17755	2697.16	0.0784864	2312.59	3145.69	1	3608.78	0.0782216	3095.83	4206.73	1
30	99.9019	0.0980951	43835	43792	43	12.787	87.213	17729	2267	15462	20.0709	79.9291	7339	1473	5866	6785.83	0.152498	5032.61	9149.8	1	3961.6	0.15362	2931.62	5353.46	1
31	99.8119	0.188055	173885	173558	327	7.16847	92.8315	139709	10015	129694	8.69034	91.3097	127567	11086	116481	6851.76	0.0562325	6136.72	7650.12	1	5559.27	0.0561545	4979.87	6206.08	1
32	99.9919	0.00813846	73724	73718	6	99.92	0.0800433	81206	81141	65	98.0401	1.95991	87657	85939	1718	8.56603	0.397536	3.92998	18.6711	1	210.65	0.378767	100.265	442.562	1
34	99.9591	0.0408815	207918	207833	85	99.9424	0.0576102	194410	194298	112	99.9417	0.058309	180075	179970	105	1.40548	0.143134	1.06167	1.86065	1	1.42338	0.145163	1.07092	1.89185	1
37	99.6651	0.334855	50171	50003	168	8.76713	91.2329	57727	5061	52666	8.66937	91.3306	36727	3184	33543	3078.47	0.0784455	2639.73	3590.12	1	3116.19	0.0792524	2667.86	3639.86	1
38	99.9689	0.0311391	64228	64208	20	99.7081	0.291908	41794	41672	122	36.1341	63.8659	19721	7126	12595	9.02458	0.236196	5.68032	14.3378	1	5403.84	0.218756	3519.6	8296.82	1
39	99.6518	0.348189	84437	84143	294	99.7401	0.259884	18085	18038	47	96.938	3.06201	3919	3799	120	0.758979	0.155854	0.559196	1.03014	0	9.08245	0.109221	7.33216	11.2506	1
40	99.8997	0.100322	196367	196170	197	99.9023	0.0976773	241612	241376	236	99.817	0.18302	248061	247607	454	0.972797	0.0963284	0.805426	1.17495	0	1.82061	0.0851906	1.54064	2.15145	1
42	99.9781	0.0218741	105147	105124	23	99.9903	0.00972889	92508	92499	9	99.9799	0.0201199	124255	124230	25	0.473536	0.376413	0.226435	0.99029	0	0.916723	0.2831	0.52633	1.59668	0
43	99.9995	0.00048799	204922	204921	1	99.9984	0.00160594	186807	186804	3	99.9995	0.00048057	208088	208087	1	2.19397	0.866031	0.401836	11.9787	0	0.984785	1	0.138714	6.99138	0
																Note. Introduction of +1 read to enable calculation with 0 value

## Sheet: Data 4.8 Table ON Efficiency
ON	RGN11179					RGN11237					RGN11189					RGN11184					RGN11208					VEGFA site 2					HEK293T site 4
	HEK	Fib	PC9	SKOV-3	U2OS	HEK	Fib	PC9	SKOV-3	U2OS	HEK	Fib	PC9	SKOV-3	U2OS	HEK	Fib	PC9	SKOV-3	U2OS	HEK	Fib	PC9	SKOV-3	U2OS	HEK	Fib	PC9	SKOV-3	U2OS	HEK	Fib	PC9	SKOV-3	U2OS
MOCK	0.0278193	0.789898	0.657036	0.665685	0.101843	0.0394217	1.10417	1.0255	0.945913	0.22041	0.502092	NA	NA	NA	1.96226	0.0493426	0.868213	0.917921	1.19001	0.125654	0.081471	0.700627	0.369557	0.290718	0.114378	0.296692	0.508274	0.813835	0.849077	0.493065	0.160173	1.27942	1.3185	1.50126	0.334855		NA, filtered due to low aligned reads
SpCas9	78.1905	19.2348	82.2918	47.3215	73.4194	97.5157	96.9625	96.278	95.2412	97.5973	96.1869	95.8733	96.3164	95.4704	96.6922	91.4653	76.2174	73.9319	87.5706	41.4536	79.9577	44.0943	56.166	17.8668	39.5657	95.9713	71.3248	95.6036	95.9942	94.7338	95.4687	72.878	94.6393	95.2347	91.3306
HiFi-SpCas9	60.3935	34.836	50.8622	52.9157	68.0541	95.4855	97.678	95.3144	95.2138	96.8941	96.3783	95.7174	97.0418	95.2925	97.3076	90.4882	82.1593	80.7285	89.4852	92.7739	17.455	6.18755	13.1796	8.80235	26.1202	95.8364	48.529	96.3355	94.4055	93.077	NA	69.8422	93.0709	93.7309	91.2329
Ttest, paired	RGN11179	RGN11237	RGN11189	RGN11184	RGN11208	VEGFA site 2	HEK293T site 4
SpCas9 vs. MOCK	0.003824	5.01671e-09	0.00159617	0.000545795	0.00495929	2.43682e-05	1.76817e-05
HiFI vs. MOCK	0.000368347	2.73865e-09	0.000883632	2.19702e-06	0.00879376	0.000392513	0.000329713
HiFi vs. SpCas9	0.467158	0.261615	0.272353	0.250543	0.0282797	0.316562	0.0813557

## Sheet: Data 4.9 Table OT efficiency
		MOCK	HiFi-SpCas9	SpCas9
Cellline	SURRO-label	Modified%	Modified%	Modified%					OT5600					OT5675					OT5595					OT5679
HEK293T	RGN11179-ON	0.0278193	60.3935	78.1905				cell line	HEK	Fib	PC9	SKOV-3	U2OS	HEK	Fib	PC9	SKOV-3	U2OS	HEK	Fib	PC9	SKOV-3	U2OS	HEK	Fib	PC9	SKOV-3	U2OS
	OT4708	0.00972742	0.0137356	0.0121502				MOCK	0.00798067	0.124606	0.0293682	0.0361051	0.0430054	0.4	0.0555007	0.0503618	0.0262812	0.0458365	0.00323746	0.0152195	0.00408842	0.00707546	0.00341108	0.00144889	0	0	0.00079623	0
	OT4729	0.00250583	0.0131615	0.125712				HiFi-SpCas9	0.0885073	0.204422	0.266347	0.169017	0.319732	0.211508	0.0359732	0.301778	0.0855281	0.159868	0.019651	0.00717116	0.00477073	0.00685077	0.00718025	0.0596049	0	0.0221849	0	0.0111719
	RGN11237-ON	0.0394217	95.4855	97.5157				SpCas9	6.22341	12.1236	6.57409	2.15468	29.9462	1.64105	0.239484	0.753622	0.250526	1.09137	0.603388	0.841306	0.245807	0.254074	0.485009	0.161652	0	0.16187	0	0.00221195
	OT9490	0.0780669	0.076963	0.41744
	OT9506	0.0320248	0.136747	30.8133
	RGN11189-ON	0.502092	96.3783	96.1869
	OT5595	0.00323746	0.019651	0.603388
	OT5600	0.00798067	0.0885073	6.22341
	OT5675	0.0490842	0.211508	1.64105
	OT5679	0.00144889	0.0596049	0.161652
	RGN11184-ON	0.0493426	90.4882	91.4653
	OT5029	0.00182266	0.0124238	1.95896
	OT5032	0.00992608	0.14305	33.9814
	OT5035	0.00280431	0.00091332	0
	RGN11208-ON	0.081471	17.455	79.9577
	OT6791	0.251407	0.263435	0.251761
	OT6832	0.00593683	0.0074903	0.0162927
	OT6873	0.756667	0.777557	0.736366
	VEGFA site 2-ON	0.296692	95.8364	95.9713
	OT11291	0.0867015	86.4286	85.8527
	OT11290	0.103313	89.7673	91.5224
	OT11296	0.00130163	0.175727	8.72957
	OT11510	0.0441538	0.0290385	0.0451838
	HEK293T site 4-ON	0.160173	NA	95.4687
	OT11397	0.00663643	0.313598	77.0067
	OT11398	0.265307	0.264026	1.99877
	OT11414	0.108282	0.0810785	0.463752
	OT11458	0.0178013	0.0155117	0.0145855
	OT11437	0.00066161	0.00051909	0.00051176
Fibroblast	RGN11179-ON	0.789898	34.836	19.2348
	OT4708	0.0168183	0.0126931	0.00729031
	OT4729	0	0	0
	RGN11237-ON	1.10417	97.678	96.9625
	OT9490	0.0768792	NA	0.221747
	OT9506	0.287112	0.0259168	3.33023
	RGN11189-ON	17.2991	95.7174	95.8733
	OT5595	0.0152195	0.00717116	0.841306
	OT5600	0.124606	0.204422	12.1236
	OT5675	0.0555007	0.0359732	0.239484
	OT5679	0	0	0
	RGN11184-ON	0.868213	82.1593	76.2174
	OT5029	0.029181	0.00058318	0.689079
	OT5032	0.274337	0.0130108	3.92448
	OT5035	0	0	0
	RGN11208-ON	0.700627	6.18755	44.0943
	OT6791	0.295005	0.284008	0.329741
	OT6832	0.00483224	0.00611079	0.0032467
	OT6873	0.728314	0.736168	0.732796
	VEGFA site 2-ON	0.508274	48.529	71.3248
	OT11291	0.380192	65.2266	75.4545
	OT11290	0.495079	26.6158	33.8799
	OT11296	0.0637821	0	0.462625
	OT11510	0.0645692	0.0334714	0.0306279
	HEK293T site 4-ON	1.27942	69.8422	72.878
	OT11397	0.235147	0.0654438	18.2317
	OT11398	0.283	0.220176	1.20117
	OT11414	0.0878792	0.0779563	0.213864
	OT11458	0.0127586	0.0106467	0.0149801
	OT11437	0.00052285	0.00132107	0.00049401
PC9	RGN11179-ON	0.657036	50.8622	82.2918
	OT4708	0.015153	0.00657341	0.0138343
	OT4729	0	0	0.0220607
	RGN11237-ON	1.0255	95.3144	96.278
	OT9490	0.0726287	0.0997133	0.287298
	OT9506	0.069541	0.0450477	12.7658
	RGN11189-ON	NA	97.0418	96.3164
	OT5595	0.00408842	0.00477073	0.245807
	OT5600	0.0293682	0.266347	6.57409
	OT5675	0.0503618	0.301778	0.753622
	OT5679	0	0.0221849	0.16187
	RGN11184-ON	0.917921	80.7285	73.9319
	OT5029	0.00510527	0	0.444641
	OT5032	0.040727	0.0316043	7.0998
	OT5035	0.00129036	0.00113644	0
	RGN11208-ON	0.369557	13.1796	56.166
	OT6791	0.425496	0.421089	0.405152
	OT6832	0.0091792	0.00965922	0.00663306
	OT6873	0.706816	0.734295	0.464324
	VEGFA site 2-ON	0.813835	96.3355	95.6036
	OT11291	0.752545	79.8972	74.4613
	OT11290	0.920923	88.8638	88.7097
	OT11296	0.00338413	0.00217313	1.02958
	OT11510	0.0402444	0.0442273	0.0377266
	HEK293T site 4-ON	1.3185	93.0709	94.6393
	OT11397	0.174397	0.409981	73.8701
	OT11398	0.239215	0.261605	1.01227
	OT11414	0.0878745	0.0864461	0.233947
	OT11458	0.0155523	0.0115539	0.0233469
	OT11437	0.00137745	0.00218734	0.00083408
SKOV-3	RGN11179-ON	0.665685	52.9157	47.3215
	OT4708	0.00554854	0.0196359	0.0123631
	OT4729	0	0.00133951	0.0508676
	RGN11237-ON	0.945913	95.2138	95.2412
	OT9490	0.0792798	0.0670691	0.113571
	OT9506	0.0748783	0.0554	3.61126
	RGN11189-ON	14.5194	95.2925	95.4704
	OT5595	0.00707546	0.00685077	0.254074
	OT5600	0.0361051	0.169017	2.15468
	OT5675	0.0262812	0.0855281	0.250526
	OT5679	0.00079623	0	0
	RGN11184-ON	1.19001	89.4852	87.5706
	OT5029	0.00241765	0.00108703	0.1884
	OT5032	0.0614861	0.0406366	3.38839
	OT5035	0.00083683	0	0.000927
	RGN11208-ON	0.290718	8.80235	17.8668
	OT6791	0.321983	0.336141	0.340249
	OT6832	0.0153053	0.0064118	0.00417868
	OT6873	0.73524	0.712493	0.792661
	VEGFA site 2-ON	0.849077	94.4055	95.9942
	OT11291	0.362866	84.6392	78.9012
	OT11290	0.861847	67.8149	69.8278
	OT11296	0.0433851	0.0325497	4.64107
	OT11510	0.0462912	0.038013	0.0487289
	HEK293T site 4-ON	1.50126	93.7309	95.2347
	OT11397	0.357529	0.305629	44.6319
	OT11398	0.326579	0.284283	4.15119
	OT11414	0.100286	0.118954	0.246993
	OT11458	0.0187735	0.0220438	0.0100364
	OT11437	0	0	0.00104777
U2OS	RGN11179-ON	0.101843	68.0541	73.4194
	OT4708	0.0164443	0.0152116	0.00515869
	OT4729	0	0	0.0908933
	RGN11237-ON	0.22041	96.8941	97.5973
	OT9490	0.0445899	0.0483321	0.688747
	OT9506	0.0695018	0.228195	45.47
	RGN11189-ON	1.96226	97.3076	96.6922
	OT5595	0.00341108	0.00718025	0.485009
	OT5600	0.0430054	0.319732	29.9462
	OT5675	0.0458365	0.159868	1.09137
	OT5679	0	0.0111719	0.00221195
	RGN11184-ON	0.125654	92.7739	41.4536
	OT5029	0.00385027	0.00094459	1.18899
	OT5032	0.0356852	0.171057	24.8148
	OT5035	0.00264128	0	0
	RGN11208-ON	0.114378	26.1202	39.5657
	OT6791	0.247159	0.246337	0.252146
	OT6832	0.00553108	0.00428908	0.0105269
	OT6873	0.81062	0.890722	0.854429
	VEGFA site 2-ON	0.493065	93.077	94.7338
	OT11291	0.0980951	87.213	79.9291
	OT11290	0.188055	92.8315	91.3097
	OT11296	0.00813846	0.0800433	1.95991
	OT11510	0.0408815	0.0576102	0.058309
	HEK293T site 4-ON	0.334855	91.2329	91.3306
	OT11397	0.0311391	0.291908	63.8659
	OT11398	0.348189	0.259884	3.06201
	OT11414	0.100322	0.0976773	0.18302
	OT11458	0.0218741	0.00972889	0.0201199
	OT11437	0.00048799	0.00160594	0.00048057

[truncated: 1 more sheets: Data 4.10 Comparisons]
