# Supplementary material for: Massively Targeted Evaluation of Therapeutic CRISPR Off-Targets in Cells
Source: Research Square preprint supplement (doi:10.21203/rs.3.rs-1427273/v1), 2022-03-17
Supplement: Supplementary file 5 [file Supplementary Data 5.xlsx]

## Sheet: Data Guideline
		Guideline of tables included in Supplementary Data 5
	Data 5.1 LibB MM position		Distribution of mismatches according to their position for OTs with 3 MM
	Data 5.2 LibB MM types		Distribution of mismatches according to their mismatch type for OTs with 3 MM
	Data 5.3 LibC SURRO-seq		SURRO-seq results of libC
	Data 5.4 LibB-AMM		Indel frequency for A type mismatches from libC
	Data 5.5 LibB-TMM		Indel frequency for T type mismatches from libC
	Data 5.6 LibB-CMM		Indel frequency for C type mismatches from libC
	Data 5.7 LibB-GMM		Indel frequency for G type mismatches from libC

## Sheet: Data 5.1 libB MM position
OTs with 3 mismatches	mm=3																					Total
	position	1	2	3	4	5	6	7	8	9	10	11	12	13	14	15	16	17	18	19	20
Counts	Total	100	96	104	100	88	81	96	81	111	89	73	86	88	75	86	95	78	95	143	158	1923
	NSOT	58	63	80	82	75	59	77	62	83	71	56	71	70	69	72	80	67	79	110	119	1503
	LIOT	17	17	15	12	10	14	12	12	16	7	8	11	11	5	10	13	6	11	19	26	252
	Sig >=3	25	16	9	6	3	8	7	7	12	11	9	4	7	1	4	2	5	5	14	13	168
	Fraction
Frequency %	Total	5.20021	4.9922	5.40822	5.20021	4.57618	4.21217	4.9922	4.21217	5.77223	4.62819	3.79615	4.47218	4.57618	3.90016	4.47218	4.9402	4.05616	4.9402	7.4363	8.21633
	NSOT	3.85895	4.19162	5.32269	5.45576	4.99002	3.92548	5.12309	4.12508	5.52229	4.72389	3.72588	4.72389	4.65735	4.59082	4.79042	5.32269	4.45775	5.25615	7.3187	7.9175
	LIOT	6.74603	6.74603	5.95238	4.7619	3.96825	5.55556	4.7619	4.7619	6.34921	2.77778	3.1746	4.36508	4.36508	1.98413	3.96825	5.15873	2.38095	4.36508	7.53968	10.3175
	HIOT	14.881	9.52381	5.35714	3.57143	1.78571	4.7619	4.16667	4.16667	7.14286	6.54762	5.35714	2.38095	4.16667	0.595238	2.38095	1.19048	2.97619	2.97619	8.33333	7.7381
Hypogeometric P value	NS	1.68274e-06	0.00134421	0.0907062	0.0657135	0.0278257	0.0522804	0.0917451	0.0999447	0.061283	0.0996321	0.107122	0.0671932	0.101779	0.00076941	0.0493743	0.0359872	0.0271743	0.0511756	0.0767852	0.0517753
	LIOT	0.0568109	0.0462018	0.105153	0.117932	0.119421	0.0657046	0.123249	0.114245	0.101578	0.0438749	0.128039	0.130197	0.128561	0.0342778	0.124279	0.119712	0.0512245	0.116856	0.101519	0.0404346
	HIOT	3.67431e-07	0.00435691	0.141626	0.0975865	0.0289626	0.140915	0.1376	0.159153	0.0931354	0.0659362	0.0831003	0.0667281	0.153008	0.00684657	0.0667281	0.00609768	0.136411	0.0771439	0.10496	0.116154
OTs with 4 mismatches	mm=4																					Total
	position	1	2	3	4	5	6	7	8	9	10	11	12	13	14	15	16	17	18	19	20
Counts	Total	1307	1285	1286	1263	1161	1201	1251	1266	1318	1187	1240	1268	1303	1293	1285	1277	1276	1335	1393	1477	25672
	NSOT	1141	1142	1167	1171	1060	1102	1158	1163	1193	1088	1142	1167	1183	1196	1177	1168	1177	1233	1276	1336	23440
	LIOT	118	110	98	77	89	88	79	86	108	84	87	92	105	88	95	102	90	91	94	107	1888
	HIOT	48	33	21	15	12	11	14	17	17	15	11	9	15	9	13	7	9	11	23	34	344
	Fraction
Frequency %	Total	5.09115	5.00545	5.00935	4.91976	4.52244	4.67825	4.87301	4.93144	5.134	4.62371	4.83017	4.93923	5.07557	5.03662	5.00545	4.97429	4.9704	5.20022	5.42615	5.75335
	NS	4.86775	4.87201	4.97867	4.99573	4.52218	4.70137	4.94027	4.9616	5.08959	4.64164	4.87201	4.97867	5.04693	5.10239	5.02133	4.98294	5.02133	5.26024	5.44369	5.69966
	LIOT	6.25	5.82627	5.19068	4.07839	4.71398	4.66102	4.18432	4.55508	5.72034	4.44915	4.60805	4.87288	5.56144	4.66102	5.03178	5.40254	4.76695	4.81992	4.97881	5.66737
	HIOT	13.9535	9.59302	6.10465	4.36047	3.48837	3.19767	4.06977	4.94186	4.94186	4.36047	3.19767	2.61628	4.36047	2.61628	3.77907	2.03488	2.61628	3.19767	6.68605	9.88372
Hypogeometric P value	NS	1.37588e-07	0.000334472	0.0303389	0.00767978	0.0424812	0.0363147	0.0111049	0.0321468	0.0226487	0.0387588	0.0253232	0.026779	0.0313252	0.0120795	0.0382287	0.0400704	0.01987	0.0151438	0.0364621	0.0181495
	LIOT	0.00276817	0.0102994	0.0401251	0.00941514	0.0413456	0.0451701	0.015935	0.0332597	0.020537	0.0429801	0.0406133	0.0438197	0.0256729	0.0331536	0.0435416	0.0287566	0.0408	0.0326911	0.0290703	0.0406287
	HIOT	1.65186e-10	0.000153268	0.0597227	0.0933694	0.0733811	0.0467469	0.0842265	0.0994201	0.0980787	0.102514	0.0389762	0.0122122	0.0867975	0.0103085	0.0618524	0.00262519	0.0115724	0.0238525	0.0522393	0.00074652

## Sheet: Data 5.2 libB MM types
	mm=3
Mismatch	Type	GA	AG	CT	CA	GT	AT	TC	CG	GC	TG	TA	AC	Total
Counts	Total	141	167	125	157	150	168	155	125	205	170	208	152	1923
	NS	77	119	95	121	114	134	127	103	165	140	174	134	1503
	Sig <3	29	29	18	20	21	27	16	14	25	17	23	13	252
	Sig >=3	35	19	12	16	15	7	12	8	15	13	11	5	168
	Fre.%	GA	AG	CT	CA	GT	AT	TC	CG	GC	TG	TA	AC				Fre.%	GA	AG	CT	CA	GT	AT	TC	CG	GC	TG	TA	AC
Frequency %	Total	7.33229	8.68435	6.50026	8.16433	7.80031	8.73635	8.06032	6.50026	10.6604	8.84035	10.8164	7.90432				Total	7.33229	8.68435	6.50026	8.16433	7.80031	8.73635	8.06032	6.50026	10.6604	8.84035	10.8164	7.90432
	NS	5.12309	7.9175	6.32069	8.05057	7.58483	8.9155	8.44977	6.85296	10.978	9.3147	11.5768	8.9155				NS	5.12309	7.9175	6.32069	8.05057	7.58483	8.9155	8.44977	6.85296	10.978	9.3147	11.5768	8.9155
	Sig <3	11.5079	11.5079	7.14286	7.93651	8.33333	10.7143	6.34921	5.55556	9.92063	6.74603	9.12698	5.15873				Sig <3	11.5079	11.5079	7.14286	7.93651	8.33333	10.7143	6.34921	5.55556	9.92063	6.74603	9.12698	5.15873
	Sig >=3	20.8333	11.3095	7.14286	9.52381	8.92857	4.16667	7.14286	4.7619	8.92857	7.7381	6.54762	2.97619				Sig >=3	20.8333	11.3095	7.14286	9.52381	8.92857	4.16667	7.14286	4.7619	8.92857	7.7381	6.54762	2.97619
Hypogeometric P value	NS	5.15856e-11	0.0065185	0.0722262	0.0744569	0.063933	0.0693026	0.0413507	0.0458962	0.0508725	0.0304626	0.00874566	0.000422228
	Sig <3	0.00326778	0.022259	0.0953035	0.098124	0.0922632	0.0449603	0.0590061	0.0927791	0.0821891	0.0452731	0.0590292	0.02233				Fre.%	Total	NS	Sig <3	Sig >=3
	Sig >=3	1.46894e-09	0.0488406	0.117404	0.0884973	0.0966534	0.00865277	0.110956	0.0899667	0.0823786	0.103201	0.0177495	0.00376291				GA	7.33229	5.12309	11.5079	20.8333
																	AG	8.68435	7.9175	11.5079	11.3095
	mm=4																CT	6.50026	6.32069	7.14286	7.14286
	Type	GA	AG	CT	CA	GT	AT	TC	CG	GC	TG	TA	AC	Total			CA	8.16433	8.05057	7.93651	9.52381
Mismatch	Total	2413	2234	1961	2246	1949	2214	1804	2026	2078	2117	2567	2063	25672			GT	7.80031	7.58483	8.33333	8.92857
Counts	NS	2125	2019	1804	2037	1800	2056	1614	1880	1903	1983	2331	1888	23440			AT	8.73635	8.9155	10.7143	4.16667
	Sig <3	204	186	134	189	135	136	154	128	140	116	212	154	1888			TC	8.06032	8.44977	6.34921	7.14286
	Sig >=3	84	29	23	20	14	22	36	18	35	18	24	21	344			CG	6.50026	6.85296	5.55556	4.7619
	Fre.%	GA	AG	CT	CA	GT	AT	TC	CG	GC	TG	TA	AC				GC	10.6604	10.978	9.92063	8.92857
Frequency %	Total	9.39935	8.70209	7.63867	8.74883	7.59193	8.62418	7.02711	7.89187	8.09442	8.24634	9.99922	8.03599				TG	8.84035	9.3147	6.74603	7.7381
	NS	9.0657	8.61348	7.69625	8.69027	7.67918	8.77133	6.88567	8.02048	8.1186	8.4599	9.94454	8.05461				TA	10.8164	11.5768	9.12698	6.54762
	Sig <3	10.8051	9.85169	7.09746	10.0106	7.15042	7.20339	8.15678	6.77966	7.41525	6.14407	11.2288	8.15678				AC	7.90432	8.9155	5.15873	2.97619
	Sig >=3	24.4186	8.43023	6.68605	5.81395	4.06977	6.39535	10.4651	5.23256	10.1744	5.23256	6.97674	6.10465
Hypogeometric P value	NS	2.66462e-09	0.00823682	0.0180092	0.0172296	0.00773816	0.000689193	0.000641645	0.00140791	0.0294891	5.36031e-06	0.0185255	0.0308012
	Sig <3	0.00317745	0.00625659	0.0240446	0.00451543	0.0276836	0.00236513	0.00520802	0.00618713	0.0189877	6.27653e-05	0.00578043	0.0341596
	Sig >=3	1.185e-16	0.0764388	0.068357	0.0111652	0.00280518	0.0266029	0.00441497	0.0143791	0.0278317	0.00897244	0.0119641	0.0347063
																	Fre.%	GA	AG	CT	CA	GT	AT	TC	CG	GC	TG	TA	AC
																	Total	9.39935	8.70209	7.63867	8.74883	7.59193	8.62418	7.02711	7.89187	8.09442	8.24634	9.99922	8.03599
																	NS	9.0657	8.61348	7.69625	8.69027	7.67918	8.77133	6.88567	8.02048	8.1186	8.4599	9.94454	8.05461
																	Sig <3	10.8051	9.85169	7.09746	10.0106	7.15042	7.20339	8.15678	6.77966	7.41525	6.14407	11.2288	8.15678
																	Sig >=3	24.4186	8.43023	6.68605	5.81395	4.06977	6.39535	10.4651	5.23256	10.1744	5.23256	6.97674	6.10465
																	Fre.%	Total	NS	Sig <3	Sig >=3
																	GA	9.39935	9.0657	10.8051	24.4186
																	AG	8.70209	8.61348	9.85169	8.43023
																	CT	7.63867	7.69625	7.09746	6.68605
																	CA	8.74883	8.69027	10.0106	5.81395
																	GT	7.59193	7.67918	7.15042	4.06977
																	AT	8.62418	8.77133	7.20339	6.39535
																	TC	7.02711	6.88567	8.15678	10.4651
																	CG	7.89187	8.02048	6.77966	5.23256
																	GC	8.09442	8.1186	7.41525	10.1744
																	TG	8.24634	8.4599	6.14407	5.23256
																	TA	9.99922	9.94454	11.2288	6.97674
																	AC	8.03599	8.05461	8.15678	6.10465

## Sheet: Data 5.3 LibC SURRO-seq
SURROID	RGN spacer sequences	Protospacer sequences	Total reads (spcas9)	Indel reads (spcas9)	IF% (SpCas9)	Total reads (MOCK)	Indel reads (MOCK)	IF% (MOCK)	p.value (Fisher)	p.adjust (BH)	FC	sig (FC>2, p.adj < 0.05)
1722	GGAGTCACATGGGAGTCACA	AGAGTCACATGGGAGTCACAGGG	901	709	78.6903	1469	12	0.816882	0	0	96.3301	Sig.
1723	GGAGTCACATGGGAGTCACA	CGAGTCACATGGGAGTCACAGGG	1045	869	83.1579	1957	6	0.306592	0	0	271.233	Sig.
1724	GGAGTCACATGGGAGTCACA	TGAGTCACATGGGAGTCACAGGG	577	519	89.948	1409	2	0.141945	0	0	633.684	Sig.
1725	GGAGTCACATGGGAGTCACA	GAAGTCACATGGGAGTCACAGGG	1792	1198	66.8527	4476	18	0.402145	0	0	166.24	Sig.
1726	GGAGTCACATGGGAGTCACA	GCAGTCACATGGGAGTCACAGGG	1486	1132	76.1777	3458	49	1.417	0	0	53.7597	Sig.
1727	GGAGTCACATGGGAGTCACA	GTAGTCACATGGGAGTCACAGGG	1304	882	67.638	3267	29	0.887665	0	0	76.1977	Sig.
1728	GGAGTCACATGGGAGTCACA	GGGGTCACATGGGAGTCACAGGG	949	799	84.1939	1076	2	0.185874	0	0	452.963	Sig.
1729	GGAGTCACATGGGAGTCACA	GGCGTCACATGGGAGTCACAGGG	1986	761	38.3182	2412	6	0.248756	4.40752e-293	1.0258e-291	154.039	Sig.
1730	GGAGTCACATGGGAGTCACA	GGTGTCACATGGGAGTCACAGGG	1938	1378	71.1042	3534	16	0.452745	0	0	157.051	Sig.
1731	GGAGTCACATGGGAGTCACA	GGAATCACATGGGAGTCACAGGG	1294	981	75.8114	2766	22	0.795372	0	0	95.3157	Sig.
1732	GGAGTCACATGGGAGTCACA	GGACTCACATGGGAGTCACAGGG	960	568	59.1667	1875	14	0.746667	0	2.14972e-307	79.2411	Sig.
1733	GGAGTCACATGGGAGTCACA	GGATTCACATGGGAGTCACAGGG	1226	873	71.2072	1830	1	0.0546448	0	0	1303.09	Sig.
1734	GGAGTCACATGGGAGTCACA	GGAGACACATGGGAGTCACAGGG	1432	1122	78.352	2198	7	0.318471	0	0	246.025	Sig.
1735	GGAGTCACATGGGAGTCACA	GGAGGCACATGGGAGTCACAGGG	1083	907	83.7488	1898	10	0.52687	0	0	158.955	Sig.
1736	GGAGTCACATGGGAGTCACA	GGAGCCACATGGGAGTCACAGGG	516	374	72.4806	944	0	0	1.8796e-229	2.93791e-228	10000000000	Sig.
1737	GGAGTCACATGGGAGTCACA	GGAGTAACATGGGAGTCACAGGG	1715	1196	69.7376	2660	6	0.225564	0	0	309.17	Sig.
1738	GGAGTCACATGGGAGTCACA	GGAGTGACATGGGAGTCACAGGG	797	624	78.2936	1163	0	0	0	0	10000000000	Sig.
1739	GGAGTCACATGGGAGTCACA	GGAGTTACATGGGAGTCACAGGG	904	698	77.2124	1379	11	0.797679	0	0	96.7963	Sig.
1740	GGAGTCACATGGGAGTCACA	GGAGTCGCATGGGAGTCACAGGG	3399	2682	78.9056	5718	33	0.577125	0	0	136.722	Sig.
1741	GGAGTCACATGGGAGTCACA	GGAGTCCCATGGGAGTCACAGGG	1499	1192	79.5197	2416	1	0.0413907	0	0	1921.2	Sig.
1742	GGAGTCACATGGGAGTCACA	GGAGTCTCATGGGAGTCACAGGG	1187	895	75.4002	2025	31	1.53086	0	0	49.2533	Sig.
1743	GGAGTCACATGGGAGTCACA	GGAGTCAAATGGGAGTCACAGGG	2073	1546	74.5779	3385	14	0.413589	0	0	180.319	Sig.
1744	GGAGTCACATGGGAGTCACA	GGAGTCAGATGGGAGTCACAGGG	2233	1729	77.4295	4329	4	0.0924001	0	0	837.98	Sig.
1745	GGAGTCACATGGGAGTCACA	GGAGTCATATGGGAGTCACAGGG	2027	1344	66.3049	4343	22	0.506562	0	0	130.892	Sig.
1746	GGAGTCACATGGGAGTCACA	GGAGTCACGTGGGAGTCACAGGG	874	706	80.778	855	1	0.116959	0	0	690.652	Sig.
1747	GGAGTCACATGGGAGTCACA	GGAGTCACCTGGGAGTCACAGGG	1268	1003	79.1009	1583	19	1.20025	0	0	65.9036	Sig.
1748	GGAGTCACATGGGAGTCACA	GGAGTCACTTGGGAGTCACAGGG	666	460	69.0691	1387	1	0.0720981	2.37525e-293	5.54167e-292	957.988	Sig.
1749	GGAGTCACATGGGAGTCACA	GGAGTCACAAGGGAGTCACAGGG	874	682	78.032	1338	13	0.971599	0	0	80.313	Sig.
1750	GGAGTCACATGGGAGTCACA	GGAGTCACAGGGGAGTCACAGGG	1069	795	74.3686	1512	9	0.595238	0	0	124.939	Sig.
1751	GGAGTCACATGGGAGTCACA	GGAGTCACACGGGAGTCACAGGG	978	789	80.6748	1180	2	0.169492	0	0	475.982	Sig.
1752	GGAGTCACATGGGAGTCACA	GGAGTCACATAGGAGTCACAGGG	1614	1443	89.4052	2217	5	0.22553	0	0	396.423	Sig.
1753	GGAGTCACATGGGAGTCACA	GGAGTCACATCGGAGTCACAGGG	1884	1066	56.5817	2414	2	0.08285	0	0	682.942	Sig.
1754	GGAGTCACATGGGAGTCACA	GGAGTCACATTGGAGTCACAGGG	1750	906	51.7714	1610	10	0.621118	1.43376e-303	3.57276e-302	83.352	Sig.
1755	GGAGTCACATGGGAGTCACA	GGAGTCACATGAGAGTCACAGGG	1642	1320	80.3898	3058	22	0.719424	0	0	111.742	Sig.
1756	GGAGTCACATGGGAGTCACA	GGAGTCACATGCGAGTCACAGGG	1046	450	43.021	1397	3	0.214746	2.55614e-190	3.20156e-189	200.335	Sig.
1757	GGAGTCACATGGGAGTCACA	GGAGTCACATGTGAGTCACAGGG	1210	367	30.3306	1405	1	0.0711744	1.80027e-136	1.5693e-135	426.145	Sig.
1758	GGAGTCACATGGGAGTCACA	GGAGTCACATGGAAGTCACAGGG	974	744	76.386	1228	23	1.87296	0	0	40.7835	Sig.
1759	GGAGTCACATGGGAGTCACA	GGAGTCACATGGCAGTCACAGGG	935	407	43.5294	1415	3	0.212014	2.39274e-186	2.91632e-185	205.314	Sig.
1760	GGAGTCACATGGGAGTCACA	GGAGTCACATGGTAGTCACAGGG	3827	1252	32.7149	6510	10	0.15361	0	0	212.974	Sig.
1761	GGAGTCACATGGGAGTCACA	GGAGTCACATGGGGGTCACAGGG	1642	650	39.5859	1887	2	0.105988	4.19647e-249	7.42494e-248	373.493	Sig.
1762	GGAGTCACATGGGAGTCACA	GGAGTCACATGGGCGTCACAGGG	1707	358	20.9725	2486	4	0.160901	4.55276e-143	4.1711e-142	130.344	Sig.
1763	GGAGTCACATGGGAGTCACA	GGAGTCACATGGGTGTCACAGGG	1196	430	35.9532	1435	2	0.139373	1.18132e-165	1.25924e-164	257.964	Sig.
1764	GGAGTCACATGGGAGTCACA	GGAGTCACATGGGAATCACAGGG	537	378	70.3911	946	37	3.91121	5.80689e-174	6.47257e-173	17.9973	Sig.
1765	GGAGTCACATGGGAGTCACA	GGAGTCACATGGGACTCACAGGG	1257	618	49.1647	1369	2	0.146092	1.17624e-239	1.98171e-238	336.532	Sig.
1766	GGAGTCACATGGGAGTCACA	GGAGTCACATGGGATTCACAGGG	984	225	22.8659	1259	15	1.19142	6.04488e-68	3.30317e-67	19.1921	Sig.
1767	GGAGTCACATGGGAGTCACA	GGAGTCACATGGGAGACACAGGG	1608	1091	67.8483	1877	7	0.372936	0	0	181.93	Sig.
1768	GGAGTCACATGGGAGTCACA	GGAGTCACATGGGAGGCACAGGG	1171	531	45.3459	2262	14	0.618921	9.54725e-267	1.87769e-265	73.266	Sig.
1769	GGAGTCACATGGGAGTCACA	GGAGTCACATGGGAGCCACAGGG	1210	710	58.6777	1721	4	0.232423	0	0	252.461	Sig.
1770	GGAGTCACATGGGAGTCACA	GGAGTCACATGGGAGTAACAGGG	1648	1041	63.1675	2078	4	0.192493	0	0	328.155	Sig.
1771	GGAGTCACATGGGAGTCACA	GGAGTCACATGGGAGTGACAGGG	1059	274	25.8735	929	6	0.645856	1.16785e-73	6.66074e-73	40.0607	Sig.
1772	GGAGTCACATGGGAGTCACA	GGAGTCACATGGGAGTTACAGGG	801	438	54.6816	1317	3	0.22779	5.35924e-223	8.07194e-222	240.052	Sig.
1773	GGAGTCACATGGGAGTCACA	GGAGTCACATGGGAGTCGCAGGG	952	387	40.6513	1648	13	0.788835	4.25423e-174	4.75864e-173	51.5333	Sig.
1774	GGAGTCACATGGGAGTCACA	GGAGTCACATGGGAGTCCCAGGG	1813	1099	60.6178	2612	33	1.2634	0	0	47.9799	Sig.
1775	GGAGTCACATGGGAGTCACA	GGAGTCACATGGGAGTCTCAGGG	1706	1106	64.83	2018	11	0.545094	0	0	118.934	Sig.
1776	GGAGTCACATGGGAGTCACA	GGAGTCACATGGGAGTCAAAGGG	1387	510	36.77	1476	7	0.474255	3.2434e-173	3.60255e-172	77.5322	Sig.
1777	GGAGTCACATGGGAGTCACA	GGAGTCACATGGGAGTCAGAGGG	1162	322	27.7108	1425	19	1.33333	9.389e-98	6.34758e-97	20.7831	Sig.
1778	GGAGTCACATGGGAGTCACA	GGAGTCACATGGGAGTCATAGGG	2445	1345	55.0102	4617	21	0.454841	0	0	120.944	Sig.
1779	GGAGTCACATGGGAGTCACA	GGAGTCACATGGGAGTCACGGGG	2111	1019	48.271	3066	11	0.358774	0	0	134.544	Sig.
1780	GGAGTCACATGGGAGTCACA	GGAGTCACATGGGAGTCACCGGG	1987	1004	50.5284	2209	21	0.950656	0	0	53.1511	Sig.
1781	GGAGTCACATGGGAGTCACA	GGAGTCACATGGGAGTCACTGGG	896	592	66.0714	1277	13	1.01801	6.67078e-279	1.41739e-277	64.9025	Sig.
3489	GTACAAGGACCGACAAGGGT	CTACAAGGACCGACAAGGGTAGG	135	93	68.8889	197	1	0.507614	8.12165e-48	3.76754e-47	135.711	Sig.
3490	GTACAAGGACCGACAAGGGT	TTACAAGGACCGACAAGGGTAGG	867	732	84.4291	1095	6	0.547945	0	0	154.083	Sig.
3491	GTACAAGGACCGACAAGGGT	GAACAAGGACCGACAAGGGTAGG	572	437	76.3986	678	4	0.589971	3.1465e-207	4.33452e-206	129.496	Sig.
3492	GTACAAGGACCGACAAGGGT	GGACAAGGACCGACAAGGGTAGG	500	420	84	548	0	0	2.01473e-211	2.87099e-210	10000000000	Sig.
3494	GTACAAGGACCGACAAGGGT	GTGCAAGGACCGACAAGGGTAGG	847	303	35.7733	1197	0	0	2.63297e-133	2.25186e-132	10000000000	Sig.
3495	GTACAAGGACCGACAAGGGT	GTCCAAGGACCGACAAGGGTAGG	1714	252	14.7025	1625	30	1.84615	7.80119e-46	3.56332e-45	7.96383	Sig.
3496	GTACAAGGACCGACAAGGGT	GTTCAAGGACCGACAAGGGTAGG	1014	486	47.929	1094	0	0	4.36294e-190	5.45741e-189	10000000000	Sig.
3498	GTACAAGGACCGACAAGGGT	GTAGAAGGACCGACAAGGGTAGG	1190	508	42.6891	1476	3	0.203252	5.31285e-205	7.19389e-204	210.03	Sig.
3499	GTACAAGGACCGACAAGGGT	GTATAAGGACCGACAAGGGTAGG	661	561	84.8714	1180	0	0	0	0	10000000000	Sig.
3500	GTACAAGGACCGACAAGGGT	GTACGAGGACCGACAAGGGTAGG	406	230	56.6502	690	8	1.15942	6.39896e-111	4.77364e-110	48.8608	Sig.
3501	GTACAAGGACCGACAAGGGT	GTACCAGGACCGACAAGGGTAGG	696	343	49.2816	544	2	0.367647	2.22287e-104	1.57907e-103	134.046	Sig.
3503	GTACAAGGACCGACAAGGGT	GTACAGGGACCGACAAGGGTAGG	982	737	75.0509	1190	1	0.0840336	0	0	893.106	Sig.
3504	GTACAAGGACCGACAAGGGT	GTACACGGACCGACAAGGGTAGG	765	455	59.4771	1032	6	0.581395	1.81575e-205	2.4727e-204	102.301	Sig.
3505	GTACAAGGACCGACAAGGGT	GTACATGGACCGACAAGGGTAGG	736	477	64.8098	848	0	0	3.85081e-214	5.56235e-213	10000000000	Sig.
3507	GTACAAGGACCGACAAGGGT	GTACAACGACCGACAAGGGTAGG	304	236	77.6316	448	10	2.23214	7.75897e-117	5.95146e-116	34.7789	Sig.
3508	GTACAAGGACCGACAAGGGT	GTACAATGACCGACAAGGGTAGG	435	157	36.092	475	1	0.210526	7.13749e-57	3.591e-56	171.437	Sig.
3510	GTACAAGGACCGACAAGGGT	GTACAAGCACCGACAAGGGTAGG	511	300	58.7084	671	0	0	5.98854e-141	5.40844e-140	10000000000	Sig.
3512	GTACAAGGACCGACAAGGGT	GTACAAGGGCCGACAAGGGTAGG	804	467	58.0846	1393	1	0.0717875	3.52329e-254	6.43727e-253	809.118	Sig.
3513	GTACAAGGACCGACAAGGGT	GTACAAGGCCCGACAAGGGTAGG	2230	1094	49.0583	2721	52	1.91106	0	0	25.6707	Sig.
3514	GTACAAGGACCGACAAGGGT	GTACAAGGTCCGACAAGGGTAGG	1085	393	36.2212	1767	15	0.848896	5.23379e-164	5.52946e-163	42.6686	Sig.
3515	GTACAAGGACCGACAAGGGT	GTACAAGGAACGACAAGGGTAGG	413	193	46.7312	719	1	0.139082	5.0335e-99	3.42977e-98	335.998	Sig.
3516	GTACAAGGACCGACAAGGGT	GTACAAGGAGCGACAAGGGTAGG	425	240	56.4706	654	4	0.611621	7.8995e-115	5.99644e-114	92.3294	Sig.
3517	GTACAAGGACCGACAAGGGT	GTACAAGGATCGACAAGGGTAGG	376	301	80.0532	460	1	0.217391	1.03105e-153	1.02129e-152	368.245	Sig.
3518	GTACAAGGACCGACAAGGGT	GTACAAGGACAGACAAGGGTAGG	1023	730	71.3587	1288	6	0.465839	0	0	153.183	Sig.
3519	GTACAAGGACCGACAAGGGT	GTACAAGGACGGACAAGGGTAGG	698	396	56.7335	699	11	1.57368	1.23033e-135	1.06275e-134	36.0516	Sig.
3520	GTACAAGGACCGACAAGGGT	GTACAAGGACTGACAAGGGTAGG	357	281	78.7115	568	0	0	7.22866e-167	7.74883e-166	10000000000	Sig.
3521	GTACAAGGACCGACAAGGGT	GTACAAGGACCAACAAGGGTAGG	1186	1020	86.0034	1605	0	0	0	0	10000000000	Sig.
3523	GTACAAGGACCGACAAGGGT	GTACAAGGACCTACAAGGGTAGG	328	269	82.0122	381	0	0	1.01342e-137	8.94878e-137	10000000000	Sig.
3524	GTACAAGGACCGACAAGGGT	GTACAAGGACCGGCAAGGGTAGG	285	200	70.1754	295	6	2.0339	4.84291e-77	2.83516e-76	34.5029	Sig.
3525	GTACAAGGACCGACAAGGGT	GTACAAGGACCGCCAAGGGTAGG	1567	888	56.6688	2434	12	0.493016	0	0	114.943	Sig.
3526	GTACAAGGACCGACAAGGGT	GTACAAGGACCGTCAAGGGTAGG	512	326	63.6719	575	12	2.08696	4.72659e-123	3.78087e-122	30.5094	Sig.
3527	GTACAAGGACCGACAAGGGT	GTACAAGGACCGAAAAGGGTAGG	366	97	26.5027	479	0	0	1.43069e-39	6.20445e-39	10000000000	Sig.
3528	GTACAAGGACCGACAAGGGT	GTACAAGGACCGAGAAGGGTAGG	1751	152	8.68075	2095	30	1.43198	3.96099e-27	1.51364e-26	6.06206	Sig.
3529	GTACAAGGACCGACAAGGGT	GTACAAGGACCGATAAGGGTAGG	165	117	70.9091	280	1	0.357143	1.19359e-66	6.47766e-66	198.545	Sig.
3530	GTACAAGGACCGACAAGGGT	GTACAAGGACCGACGAGGGTAGG	1006	712	70.7753	1836	9	0.490196	0	0	144.382	Sig.
3531	GTACAAGGACCGACAAGGGT	GTACAAGGACCGACCAGGGTAGG	390	217	55.641	277	7	2.52708	1.07916e-55	5.3811e-55	22.0179	Sig.
3532	GTACAAGGACCGACAAGGGT	GTACAAGGACCGACTAGGGTAGG	709	369	52.0451	1024	1	0.0976562	1.01358e-174	1.13911e-173	532.942	Sig.
3533	GTACAAGGACCGACAAGGGT	GTACAAGGACCGACAGGGGTAGG	1038	664	63.9692	1059	0	0	1.60949e-274	3.35246e-273	10000000000	Sig.
3534	GTACAAGGACCGACAAGGGT	GTACAAGGACCGACACGGGTAGG	1006	82	8.15109	965	6	0.621762	3.16454e-18	1.05844e-17	13.1097	Sig.
3535	GTACAAGGACCGACAAGGGT	GTACAAGGACCGACATGGGTAGG	1215	81	6.66667	1009	10	0.99108	7.23696e-13	2.16699e-12	6.72667	Sig.
3537	GTACAAGGACCGACAAGGGT	GTACAAGGACCGACAACGGTAGG	1210	266	21.9835	1556	6	0.385604	1.02412e-93	6.69087e-93	57.0105	Sig.
3538	GTACAAGGACCGACAAGGGT	GTACAAGGACCGACAATGGTAGG	876	368	42.0091	979	8	0.81716	1.21741e-128	1.00247e-127	51.4087	Sig.
3539	GTACAAGGACCGACAAGGGT	GTACAAGGACCGACAAGAGTAGG	1343	859	63.9613	2020	7	0.346535	0	0	184.574	Sig.
3540	GTACAAGGACCGACAAGGGT	GTACAAGGACCGACAAGCGTAGG	1104	488	44.2029	1262	2	0.158479	8.87252e-190	1.10691e-188	278.92	Sig.
3541	GTACAAGGACCGACAAGGGT	GTACAAGGACCGACAAGTGTAGG	601	324	53.9101	684	1	0.146199	2.90484e-133	2.48215e-132	368.745	Sig.
3542	GTACAAGGACCGACAAGGGT	GTACAAGGACCGACAAGGATAGG	572	418	73.0769	735	3	0.408163	9.97697e-205	1.34902e-203	179.038	Sig.
3544	GTACAAGGACCGACAAGGGT	GTACAAGGACCGACAAGGTTAGG	795	557	70.0629	1153	2	0.173461	4.30777e-291	9.80996e-290	403.913	Sig.
3545	GTACAAGGACCGACAAGGGT	GTACAAGGACCGACAAGGGAAGG	709	181	25.5289	1224	15	1.22549	4.81589e-67	2.61807e-66	20.8316	Sig.
3546	GTACAAGGACCGACAAGGGT	GTACAAGGACCGACAAGGGGAGG	323	118	36.5325	480	0	0	3.87692e-54	1.89935e-53	10000000000	Sig.
3547	GTACAAGGACCGACAAGGGT	GTACAAGGACCGACAAGGGCAGG	562	247	43.9502	801	0	0	2.19597e-113	1.65769e-112	10000000000	Sig.
5257	TGACATCAATTATTATACAT	AGACATCAATTATTATACATCGG	354	149	42.0904	461	3	0.650759	4.31688e-59	2.20927e-58	64.6789	Sig.
5258	TGACATCAATTATTATACAT	GGACATCAATTATTATACATCGG	1123	265	23.5975	1270	0	0	6.18106e-96	4.11451e-95	10000000000	Sig.
5259	TGACATCAATTATTATACAT	CGACATCAATTATTATACATCGG	575	98	17.0435	656	2	0.304878	5.48506e-32	2.20305e-31	55.9026	Sig.
5260	TGACATCAATTATTATACAT	TAACATCAATTATTATACATCGG	1883	164	8.70951	2119	1	0.0471921	3.61614e-54	1.77342e-53	184.554	Sig.
5261	TGACATCAATTATTATACAT	TCACATCAATTATTATACATCGG	1009	41	4.06343	1192	0	0	8.26329e-15	2.58659e-14	10000000000	Sig.
5262	TGACATCAATTATTATACAT	TTACATCAATTATTATACATCGG	1676	178	10.6205	1550	19	1.22581	8.50475e-33	3.45084e-32	8.66411	Sig.
5263	TGACATCAATTATTATACAT	TGGCATCAATTATTATACATCGG	1548	59	3.81137	1299	14	1.07775	2.20611e-06	5.1257e-06	3.53641	Sig.
5264	TGACATCAATTATTATACAT	TGCCATCAATTATTATACATCGG	1151	1	0.086881	1042	2	0.191939	0.607137	0.720526	0.45265	NS
5266	TGACATCAATTATTATACAT	TGAAATCAATTATTATACATCGG	1258	85	6.75676	1434	28	1.95258	4.62064e-10	1.28046e-09	3.46042	Sig.
5267	TGACATCAATTATTATACAT	TGAGATCAATTATTATACATCGG	1343	10	0.744602	1330	0	0	0.00192246	0.00353144	10000000000	Sig.
5269	TGACATCAATTATTATACAT	TGACGTCAATTATTATACATCGG	1851	35	1.89087	1869	4	0.214018	1.45029e-07	3.62819e-07	8.83509	Sig.
5270	TGACATCAATTATTATACAT	TGACCTCAATTATTATACATCGG	1712	2	0.116822	2001	0	0	0.21253	0.292014	10000000000	NS
5271	TGACATCAATTATTATACAT	TGACTTCAATTATTATACATCGG	2141	3	0.140121	2429	2	0.0823384	0.670279	0.780285	1.70177	NS
5272	TGACATCAATTATTATACAT	TGACAACAATTATTATACATCGG	2067	127	6.14417	1902	4	0.210305	1.53426e-31	6.11071e-31	29.2155	Sig.
5273	TGACATCAATTATTATACAT	TGACAGCAATTATTATACATCGG	1253	72	5.74621	1703	3	0.17616	6.19922e-24	2.27313e-23	32.6193	Sig.
5274	TGACATCAATTATTATACAT	TGACACCAATTATTATACATCGG	703	182	25.889	809	32	3.9555	4.30524e-36	1.80377e-35	6.54507	Sig.
5275	TGACATCAATTATTATACAT	TGACATAAATTATTATACATCGG	894	22	2.46085	693	1	0.1443	5.13959e-05	0.000109034	17.0537	Sig.
5276	TGACATCAATTATTATACAT	TGACATGAATTATTATACATCGG	2043	1	0.0489476	2106	2	0.0949668	1	1	0.515419	NS
5277	TGACATCAATTATTATACAT	TGACATTAATTATTATACATCGG	1587	26	1.63831	1623	11	0.677757	0.0125119	0.0208839	2.41725	Sig.
5278	TGACATCAATTATTATACAT	TGACATCGATTATTATACATCGG	1426	1	0.0701262	1247	0	0	1	1	10000000000	NS
5279	TGACATCAATTATTATACAT	TGACATCCATTATTATACATCGG	2436	6	0.246305	2573	13	0.505247	0.169284	0.237882	0.487495	NS
5280	TGACATCAATTATTATACAT	TGACATCTATTATTATACATCGG	1334	1	0.0749625	1497	1	0.0668003	1	1	1.12219	NS
5281	TGACATCAATTATTATACAT	TGACATCAGTTATTATACATCGG	1279	63	4.92572	1620	2	0.123457	1.18422e-20	4.11861e-20	39.8984	Sig.
5282	TGACATCAATTATTATACAT	TGACATCACTTATTATACATCGG	1479	8	0.540906	1439	6	0.416956	0.7903	0.898253	1.29727	NS
5283	TGACATCAATTATTATACAT	TGACATCATTTATTATACATCGG	2841	11	0.387188	2685	10	0.372439	1	1	1.0396	NS
5284	TGACATCAATTATTATACAT	TGACATCAAATATTATACATCGG	4134	154	3.72521	3897	17	0.436233	8.85743e-28	3.40387e-27	8.53949	Sig.
5285	TGACATCAATTATTATACAT	TGACATCAAGTATTATACATCGG	1601	52	3.24797	1922	28	1.45682	0.000400638	0.000791218	2.2295	Sig.
5286	TGACATCAATTATTATACAT	TGACATCAACTATTATACATCGG	1443	21	1.4553	1487	25	1.68124	0.657886	0.767641	0.865613	NS
5287	TGACATCAATTATTATACAT	TGACATCAATAATTATACATCGG	2163	31	1.43319	2220	31	1.3964	1	1	1.02635	NS
5288	TGACATCAATTATTATACAT	TGACATCAATGATTATACATCGG	3752	91	2.42537	4393	7	0.159344	3.89889e-23	1.41331e-22	15.2209	Sig.
5289	TGACATCAATTATTATACAT	TGACATCAATCATTATACATCGG	1699	46	2.70747	1738	8	0.460299	5.03355e-08	1.28664e-07	5.88199	Sig.
5290	TGACATCAATTATTATACAT	TGACATCAATTGTTATACATCGG	2327	22	0.945423	2374	13	0.547599	0.127883	0.18278	1.72649	NS
5291	TGACATCAATTATTATACAT	TGACATCAATTCTTATACATCGG	669	3	0.44843	727	2	0.275103	0.675138	0.784393	1.63004	NS
5292	TGACATCAATTATTATACAT	TGACATCAATTTTTATACATCGG	1606	8	0.498132	1658	2	0.120627	0.0611703	0.0923668	4.12951	NS
5293	TGACATCAATTATTATACAT	TGACATCAATTAATATACATCGG	1291	16	1.23935	1401	18	1.2848	1	1	0.964627	NS
5294	TGACATCAATTATTATACAT	TGACATCAATTAGTATACATCGG	730	15	2.05479	854	1	0.117096	0.000123877	0.000255069	17.5479	Sig.
5295	TGACATCAATTATTATACAT	TGACATCAATTACTATACATCGG	1888	330	17.4788	2117	8	0.377893	4.68799e-102	3.26444e-101	46.2533	Sig.
5296	TGACATCAATTATTATACAT	TGACATCAATTATAATACATCGG	661	1	0.151286	947	7	0.739176	0.151283	0.213755	0.204668	NS
5297	TGACATCAATTATTATACAT	TGACATCAATTATGATACATCGG	810	2	0.246914	742	1	0.134771	1	1	1.8321	NS
5298	TGACATCAATTATTATACAT	TGACATCAATTATCATACATCGG	3206	7	0.218341	3122	10	0.320307	0.474827	0.587491	0.681659	NS
5299	TGACATCAATTATTATACAT	TGACATCAATTATTGTACATCGG	1788	2	0.111857	1692	1	0.0591017	1	1	1.89262	NS
5300	TGACATCAATTATTATACAT	TGACATCAATTATTCTACATCGG	2254	21	0.931677	2273	14	0.615926	0.239352	0.323451	1.51264	NS
5301	TGACATCAATTATTATACAT	TGACATCAATTATTTTACATCGG	1638	11	0.671551	1631	26	1.59411	0.0131546	0.0218914	0.421269	NS
5302	TGACATCAATTATTATACAT	TGACATCAATTATTAAACATCGG	1887	15	0.794913	2180	2	0.0917431	0.00080522	0.00154037	8.66455	Sig.
5303	TGACATCAATTATTATACAT	TGACATCAATTATTAGACATCGG	356	6	1.68539	500	0	0	0.00504766	0.00884874	10000000000	Sig.
5304	TGACATCAATTATTATACAT	TGACATCAATTATTACACATCGG	991	18	1.81635	915	6	0.655738	0.024337	0.0390731	2.76993	Sig.
5305	TGACATCAATTATTATACAT	TGACATCAATTATTATGCATCGG	2164	20	0.924214	2266	3	0.132392	0.00020681	0.000418144	6.9809	Sig.
5306	TGACATCAATTATTATACAT	TGACATCAATTATTATCCATCGG	1338	6	0.44843	1553	13	0.83709	0.250483	0.335682	0.535702	NS
5307	TGACATCAATTATTATACAT	TGACATCAATTATTATTCATCGG	1753	1	0.0570451	1781	2	0.112296	1	1	0.507986	NS
5308	TGACATCAATTATTATACAT	TGACATCAATTATTATAAATCGG	704	13	1.84659	762	15	1.9685	1	1	0.938068	NS
5309	TGACATCAATTATTATACAT	TGACATCAATTATTATAGATCGG	1552	8	0.515464	1468	6	0.408719	0.791179	0.89893	1.26117	NS
5310	TGACATCAATTATTATACAT	TGACATCAATTATTATATATCGG	5399	109	2.01889	4958	18	0.36305	1.01868e-15	3.25725e-15	5.56093	Sig.
5311	TGACATCAATTATTATACAT	TGACATCAATTATTATACGTCGG	2359	26	1.10216	2513	4	0.159172	2.21999e-05	4.82137e-05	6.92433	Sig.
5312	TGACATCAATTATTATACAT	TGACATCAATTATTATACCTCGG	2088	88	4.21456	1953	2	0.102407	2.57364e-23	9.37202e-23	41.1552	Sig.
5313	TGACATCAATTATTATACAT	TGACATCAATTATTATACTTCGG	2796	264	9.44206	2787	1	0.0358809	1.51342e-80	9.11788e-80	263.15	Sig.
5314	TGACATCAATTATTATACAT	TGACATCAATTATTATACAACGG	1062	25	2.35405	1035	34	3.28502	0.234559	0.317741	0.7166	NS
5315	TGACATCAATTATTATACAT	TGACATCAATTATTATACAGCGG	918	5	0.544662	966	12	1.24224	0.143868	0.203882	0.438453	NS
5316	TGACATCAATTATTATACAT	TGACATCAATTATTATACACCGG	1254	7	0.558214	1263	35	2.77118	1.29941e-05	2.87386e-05	0.201435	NS
7027	GCGTGACTTCCACATGAGCG	ACGTGACTTCCACATGAGCGTGG	1815	1153	63.5262	2840	2	0.0704225	0	0	902.072	Sig.
7028	GCGTGACTTCCACATGAGCG	CCGTGACTTCCACATGAGCGTGG	1444	361	25	1547	4	0.258565	1.60799e-118	1.24747e-117	96.6875	Sig.
7029	GCGTGACTTCCACATGAGCG	TCGTGACTTCCACATGAGCGTGG	2068	721	34.8646	2270	6	0.264317	2.68225e-254	4.91953e-253	131.904	Sig.
7030	GCGTGACTTCCACATGAGCG	GAGTGACTTCCACATGAGCGTGG	689	165	23.9478	793	1	0.126103	8.63371e-59	4.40194e-58	189.906	Sig.
7031	GCGTGACTTCCACATGAGCG	GGGTGACTTCCACATGAGCGTGG	1281	1103	86.1046	1725	6	0.347826	0	0	247.551	Sig.
7032	GCGTGACTTCCACATGAGCG	GTGTGACTTCCACATGAGCGTGG	1809	823	45.4947	1927	2	0.103788	0	3.31177e-308	438.342	Sig.
7033	GCGTGACTTCCACATGAGCG	GCATGACTTCCACATGAGCGTGG	2602	503	19.3313	2715	55	2.02578	1.45788e-105	1.04736e-104	9.54262	Sig.
7034	GCGTGACTTCCACATGAGCG	GCCTGACTTCCACATGAGCGTGG	5258	244	4.64055	5603	27	0.481885	3.12416e-49	1.46569e-48	9.63	Sig.
7035	GCGTGACTTCCACATGAGCG	GCTTGACTTCCACATGAGCGTGG	3172	253	7.97604	3280	65	1.98171	3.74875e-30	1.48068e-29	4.02483	Sig.
7036	GCGTGACTTCCACATGAGCG	GCGAGACTTCCACATGAGCGTGG	1631	171	10.4844	1496	8	0.534759	9.08836e-40	3.94852e-39	19.6058	Sig.
7037	GCGTGACTTCCACATGAGCG	GCGGGACTTCCACATGAGCGTGG	1337	397	29.6933	1662	3	0.180505	3.65282e-150	3.53365e-149	164.501	Sig.
7038	GCGTGACTTCCACATGAGCG	GCGCGACTTCCACATGAGCGTGG	2917	513	17.5866	3296	10	0.303398	2.4789e-162	2.57324e-161	57.9653	Sig.
7039	GCGTGACTTCCACATGAGCG	GCGTAACTTCCACATGAGCGTGG	1728	334	19.3287	1811	4	0.220872	6.92706e-105	4.94664e-104	87.5107	Sig.
7040	GCGTGACTTCCACATGAGCG	GCGTCACTTCCACATGAGCGTGG	8811	1930	21.9044	11280	61	0.54078	0	0	40.5053	Sig.
7041	GCGTGACTTCCACATGAGCG	GCGTTACTTCCACATGAGCGTGG	1498	120	8.01068	1747	2	0.114482	8.40216e-39	3.6141e-38	69.9733	Sig.
7042	GCGTGACTTCCACATGAGCG	GCGTGGCTTCCACATGAGCGTGG	2822	1101	39.0149	2536	5	0.197161	0	0	197.883	Sig.
7043	GCGTGACTTCCACATGAGCG	GCGTGCCTTCCACATGAGCGTGG	3946	393	9.95945	4841	3	0.0619707	5.60625e-136	4.86028e-135	160.712	Sig.
7044	GCGTGACTTCCACATGAGCG	GCGTGTCTTCCACATGAGCGTGG	6524	1042	15.9718	6157	42	0.68215	3.49082e-256	6.45226e-255	23.4139	Sig.
7045	GCGTGACTTCCACATGAGCG	GCGTGAATTCCACATGAGCGTGG	2758	380	13.7781	2911	36	1.23669	5.88482e-83	3.61637e-82	11.1411	Sig.
7046	GCGTGACTTCCACATGAGCG	GCGTGAGTTCCACATGAGCGTGG	2134	155	7.26336	2105	12	0.570071	9.75073e-34	3.99386e-33	12.7411	Sig.
7048	GCGTGACTTCCACATGAGCG	GCGTGACATCCACATGAGCGTGG	3323	543	16.3407	3352	11	0.328162	4.52729e-156	4.53157e-155	49.7944	Sig.
7049	GCGTGACTTCCACATGAGCG	GCGTGACGTCCACATGAGCGTGG	2244	362	16.1319	2035	5	0.2457	1.98857e-99	1.36083e-98	65.6569	Sig.
7050	GCGTGACTTCCACATGAGCG	GCGTGACCTCCACATGAGCGTGG	3395	2522	74.2857	3628	16	0.441014	0	0	168.443	Sig.
7051	GCGTGACTTCCACATGAGCG	GCGTGACTACCACATGAGCGTGG	761	314	41.2615	1242	31	2.49597	2.05056e-114	1.55408e-113	16.5312	Sig.
7052	GCGTGACTTCCACATGAGCG	GCGTGACTGCCACATGAGCGTGG	1449	369	25.4658	1463	0	0	2.48514e-124	2.00645e-123	10000000000	Sig.
7053	GCGTGACTTCCACATGAGCG	GCGTGACTCCCACATGAGCGTGG	1469	953	64.8741	1487	7	0.470746	0	0	137.811	Sig.
7054	GCGTGACTTCCACATGAGCG	GCGTGACTTACACATGAGCGTGG	1692	109	6.44208	2032	30	1.47638	9.84389e-16	3.14866e-15	4.36344	Sig.
7055	GCGTGACTTCCACATGAGCG	GCGTGACTTGCACATGAGCGTGG	3880	58	1.49485	3730	12	0.321716	4.27747e-08	1.0975e-07	4.64648	Sig.
7056	GCGTGACTTCCACATGAGCG	GCGTGACTTTCACATGAGCGTGG	2404	700	29.1181	2429	6	0.247015	3.11009e-226	4.77499e-225	117.88	Sig.
7057	GCGTGACTTCCACATGAGCG	GCGTGACTTCAACATGAGCGTGG	1428	85	5.95238	1678	8	0.476758	9.04081e-21	3.15121e-20	12.4851	Sig.
7058	GCGTGACTTCCACATGAGCG	GCGTGACTTCGACATGAGCGTGG	925	2	0.216216	1122	1	0.0891266	0.592484	0.705864	2.42595	NS
7059	GCGTGACTTCCACATGAGCG	GCGTGACTTCTACATGAGCGTGG	2013	270	13.4128	2126	14	0.658514	8.51005e-70	4.71795e-69	20.3683	Sig.
7060	GCGTGACTTCCACATGAGCG	GCGTGACTTCCGCATGAGCGTGG	1916	171	8.92484	1646	3	0.18226	2.4618e-43	1.09658e-42	48.9676	Sig.
7061	GCGTGACTTCCACATGAGCG	GCGTGACTTCCCCATGAGCGTGG	6940	248	3.57349	6265	25	0.399042	1.92451e-43	8.5765e-43	8.95516	Sig.
7062	GCGTGACTTCCACATGAGCG	GCGTGACTTCCTCATGAGCGTGG	2059	39	1.89412	1967	2	0.101678	9.11483e-10	2.50401e-09	18.6287	Sig.
7063	GCGTGACTTCCACATGAGCG	GCGTGACTTCCAAATGAGCGTGG	2905	68	2.34079	2726	10	0.366838	4.50234e-11	1.28355e-10	6.381	Sig.
7064	GCGTGACTTCCACATGAGCG	GCGTGACTTCCAGATGAGCGTGG	3025	145	4.79339	2558	15	0.586396	4.33077e-24	1.59168e-23	8.17433	Sig.
7065	GCGTGACTTCCACATGAGCG	GCGTGACTTCCATATGAGCGTGG	3300	665	20.1515	4592	25	0.544425	1.32731e-230	2.10228e-229	37.0143	Sig.
7066	GCGTGACTTCCACATGAGCG	GCGTGACTTCCACGTGAGCGTGG	1589	53	3.33543	1609	35	2.17526	0.0513714	0.0783284	1.53335	NS
7067	GCGTGACTTCCACATGAGCG	GCGTGACTTCCACCTGAGCGTGG	2497	121	4.84581	2799	4	0.142908	6.08905e-35	2.52007e-34	33.9086	Sig.
7068	GCGTGACTTCCACATGAGCG	GCGTGACTTCCACTTGAGCGTGG	3274	569	17.3794	3112	15	0.482005	5.2468e-152	5.12249e-151	36.0564	Sig.
7069	GCGTGACTTCCACATGAGCG	GCGTGACTTCCACAAGAGCGTGG	1780	400	22.4719	2299	2	0.0869943	1.31169e-152	1.28589e-151	258.315	Sig.
7070	GCGTGACTTCCACATGAGCG	GCGTGACTTCCACAGGAGCGTGG	2199	73	3.31969	2249	17	0.755892	6.45262e-10	1.77985e-09	4.39176	Sig.
7071	GCGTGACTTCCACATGAGCG	GCGTGACTTCCACACGAGCGTGG	1726	110	6.37312	1731	4	0.23108	5.62165e-29	2.18776e-28	27.5797	Sig.
7072	GCGTGACTTCCACATGAGCG	GCGTGACTTCCACATAAGCGTGG	823	254	30.8627	971	1	0.102987	2.47658e-95	1.64054e-94	299.677	Sig.
7073	GCGTGACTTCCACATGAGCG	GCGTGACTTCCACATCAGCGTGG	6914	22	0.318195	6070	44	0.724876	0.00121465	0.00227649	0.438964	NS
7074	GCGTGACTTCCACATGAGCG	GCGTGACTTCCACATTAGCGTGG	1385	8	0.577617	1246	4	0.321027	0.394681	0.503211	1.79928	NS
7075	GCGTGACTTCCACATGAGCG	GCGTGACTTCCACATGGGCGTGG	66	11	16.6667	68	1	1.47059	0.00202319	0.0037086	11.3333	Sig.
7076	GCGTGACTTCCACATGAGCG	GCGTGACTTCCACATGCGCGTGG	3925	142	3.61783	3771	83	2.20101	0.000243495	0.000488851	1.64372	NS
7077	GCGTGACTTCCACATGAGCG	GCGTGACTTCCACATGTGCGTGG	3369	68	2.0184	2908	10	0.343879	2.97218e-10	8.28227e-10	5.86952	Sig.
7078	GCGTGACTTCCACATGAGCG	GCGTGACTTCCACATGAACGTGG	3140	916	29.172	3859	14	0.362788	0	0	80.4105	Sig.
7079	GCGTGACTTCCACATGAGCG	GCGTGACTTCCACATGACCGTGG	2546	540	21.2097	2708	21	0.77548	5.49538e-152	5.35968e-151	27.3505	Sig.
7080	GCGTGACTTCCACATGAGCG	GCGTGACTTCCACATGATCGTGG	1998	453	22.6727	1828	2	0.109409	7.19096e-136	6.22279e-135	207.228	Sig.
7081	GCGTGACTTCCACATGAGCG	GCGTGACTTCCACATGAGAGTGG	1174	155	13.2027	1165	1	0.0858369	1.87392e-47	8.64657e-47	153.812	Sig.
7082	GCGTGACTTCCACATGAGCG	GCGTGACTTCCACATGAGGGTGG	1416	112	7.9096	1403	9	0.641483	1.4759e-24	5.4475e-24	12.3302	Sig.
7083	GCGTGACTTCCACATGAGCG	GCGTGACTTCCACATGAGTGTGG	2461	621	25.2336	2174	39	1.79393	5.04496e-137	4.42608e-136	14.0661	Sig.
7084	GCGTGACTTCCACATGAGCG	GCGTGACTTCCACATGAGCATGG	1663	616	37.0415	2700	19	0.703704	1.20203e-262	2.29761e-261	52.6379	Sig.
7085	GCGTGACTTCCACATGAGCG	GCGTGACTTCCACATGAGCCTGG	2326	347	14.9183	2616	5	0.191131	2.77817e-111	2.07904e-110	78.0526	Sig.
7086	GCGTGACTTCCACATGAGCG	GCGTGACTTCCACATGAGCTTGG	1458	568	38.9575	1290	2	0.155039	1.44909e-180	1.70505e-179	251.276	Sig.
8795	CATTGAGATAGTGTGGGGAA	AATTGAGATAGTGTGGGGAAGGG	601	320	53.2446	751	7	0.932091	1.16339e-128	9.58814e-128	57.1238	Sig.
8796	CATTGAGATAGTGTGGGGAA	GATTGAGATAGTGTGGGGAAGGG	1463	789	53.9303	1462	5	0.341997	5.03864e-291	1.1447e-289	157.692	Sig.
8797	CATTGAGATAGTGTGGGGAA	TATTGAGATAGTGTGGGGAAGGG	1638	841	51.3431	2043	4	0.195791	0	0	262.235	Sig.
8798	CATTGAGATAGTGTGGGGAA	CGTTGAGATAGTGTGGGGAAGGG	1930	466	24.1451	1904	2	0.105042	7.56641e-149	7.23866e-148	229.861	Sig.
8799	CATTGAGATAGTGTGGGGAA	CCTTGAGATAGTGTGGGGAAGGG	2240	728	32.5	2777	2	0.0720202	1.65818e-284	3.6879e-283	451.262	Sig.
8800	CATTGAGATAGTGTGGGGAA	CTTTGAGATAGTGTGGGGAAGGG	3423	826	24.1309	3811	7	0.183679	6.47685e-280	1.38858e-278	131.375	Sig.
8801	CATTGAGATAGTGTGGGGAA	CAATGAGATAGTGTGGGGAAGGG	2300	345	15	2797	19	0.679299	1.51852e-99	1.03991e-98	22.0816	Sig.
8803	CATTGAGATAGTGTGGGGAA	CACTGAGATAGTGTGGGGAAGGG	2455	229	9.3279	2364	17	0.71912	5.1179e-49	2.39397e-48	12.9713	Sig.
8804	CATTGAGATAGTGTGGGGAA	CATAGAGATAGTGTGGGGAAGGG	1775	266	14.9859	1770	1	0.0564972	5.62122e-83	3.45661e-82	265.251	Sig.
8805	CATTGAGATAGTGTGGGGAA	CATGGAGATAGTGTGGGGAAGGG	3212	1004	31.2578	4160	8	0.192308	0	0	162.54	Sig.
8806	CATTGAGATAGTGTGGGGAA	CATCGAGATAGTGTGGGGAAGGG	1778	206	11.5861	2272	5	0.22007	4.6912e-69	2.58423e-68	52.647	Sig.
8807	CATTGAGATAGTGTGGGGAA	CATTAAGATAGTGTGGGGAAGGG	1861	236	12.6814	1909	19	0.995285	2.91618e-53	1.41918e-52	12.7414	Sig.
8808	CATTGAGATAGTGTGGGGAA	CATTCAGATAGTGTGGGGAAGGG	2221	181	8.14948	2395	1	0.0417537	5.82612e-58	2.95151e-57	195.18	Sig.
8809	CATTGAGATAGTGTGGGGAA	CATTTAGATAGTGTGGGGAAGGG	1786	153	8.56663	1681	26	1.5467	1.43291e-22	5.14712e-22	5.53866	Sig.
8810	CATTGAGATAGTGTGGGGAA	CATTGGGATAGTGTGGGGAAGGG	1483	202	13.621	1453	9	0.619408	7.50409e-51	3.58232e-50	21.9904	Sig.
8811	CATTGAGATAGTGTGGGGAA	CATTGCGATAGTGTGGGGAAGGG	1194	277	23.1993	1322	9	0.680787	3.45927e-84	2.14101e-83	34.0772	Sig.
8812	CATTGAGATAGTGTGGGGAA	CATTGTGATAGTGTGGGGAAGGG	1348	145	10.7567	1317	0	0	2.15443e-45	9.80307e-45	10000000000	Sig.
8813	CATTGAGATAGTGTGGGGAA	CATTGAAATAGTGTGGGGAAGGG	1820	389	21.3736	1784	2	0.112108	9.03129e-122	7.16407e-121	190.653	Sig.
8814	CATTGAGATAGTGTGGGGAA	CATTGACATAGTGTGGGGAAGGG	1203	205	17.0407	1149	1	0.0870322	2.85724e-62	1.49934e-61	195.798	Sig.
8815	CATTGAGATAGTGTGGGGAA	CATTGATATAGTGTGGGGAAGGG	1555	203	13.0547	1799	18	1.00056	5.48439e-50	2.59602e-49	13.0474	Sig.
8816	CATTGAGATAGTGTGGGGAA	CATTGAGGTAGTGTGGGGAAGGG	6703	1031	15.3812	7253	6	0.0827244	0	0	185.933	Sig.
8817	CATTGAGATAGTGTGGGGAA	CATTGAGCTAGTGTGGGGAAGGG	918	194	21.1329	1161	10	0.861326	8.9879e-61	4.66753e-60	24.5353	Sig.
8818	CATTGAGATAGTGTGGGGAA	CATTGAGTTAGTGTGGGGAAGGG	2013	177	8.79285	1934	11	0.568769	5.35187e-40	2.33262e-39	15.4594	Sig.
8819	CATTGAGATAGTGTGGGGAA	CATTGAGAAAGTGTGGGGAAGGG	4536	847	18.6728	5550	21	0.378378	3.27859e-278	6.95076e-277	49.3496	Sig.
8820	CATTGAGATAGTGTGGGGAA	CATTGAGAGAGTGTGGGGAAGGG	3380	427	12.6331	3295	7	0.212443	2.86883e-120	2.25503e-119	59.466	Sig.
8821	CATTGAGATAGTGTGGGGAA	CATTGAGACAGTGTGGGGAAGGG	2077	663	31.921	3092	1	0.0323415	4.75837e-293	1.10475e-291	986.999	Sig.
8822	CATTGAGATAGTGTGGGGAA	CATTGAGATGGTGTGGGGAAGGG	3032	606	19.9868	3040	1	0.0328947	1.34123e-195	1.73703e-194	607.599	Sig.
8823	CATTGAGATAGTGTGGGGAA	CATTGAGATCGTGTGGGGAAGGG	1579	215	13.6162	1568	39	2.48724	6.92163e-33	2.81208e-32	5.47442	Sig.
8824	CATTGAGATAGTGTGGGGAA	CATTGAGATTGTGTGGGGAAGGG	3494	393	11.2479	3823	55	1.43866	4.04411e-75	2.33308e-74	7.81828	Sig.
8825	CATTGAGATAGTGTGGGGAA	CATTGAGATAATGTGGGGAAGGG	2334	847	36.2896	2646	7	0.26455	1.79183e-307	4.53628e-306	137.175	Sig.
8826	CATTGAGATAGTGTGGGGAA	CATTGAGATACTGTGGGGAAGGG	1927	287	14.8936	2019	0	0	3.53987e-95	2.34163e-94	10000000000	Sig.
8828	CATTGAGATAGTGTGGGGAA	CATTGAGATAGAGTGGGGAAGGG	5169	1067	20.6423	6745	13	0.192735	0	0	107.102	Sig.
8829	CATTGAGATAGTGTGGGGAA	CATTGAGATAGGGTGGGGAAGGG	2220	585	26.3514	2296	28	1.21951	5.64992e-159	5.7582e-158	21.6081	Sig.
8831	CATTGAGATAGTGTGGGGAA	CATTGAGATAGTATGGGGAAGGG	1962	565	28.7971	1956	9	0.460123	6.61936e-174	7.36955e-173	62.5858	Sig.
8832	CATTGAGATAGTGTGGGGAA	CATTGAGATAGTCTGGGGAAGGG	1452	209	14.3939	1856	3	0.161638	7.43214e-74	4.24649e-73	89.0505	Sig.
8833	CATTGAGATAGTGTGGGGAA	CATTGAGATAGTTTGGGGAAGGG	2315	186	8.03456	2781	0	0	2.68342e-66	1.44969e-65	10000000000	Sig.
8834	CATTGAGATAGTGTGGGGAA	CATTGAGATAGTGAGGGGAAGGG	1992	226	11.3454	1892	2	0.105708	2.83681e-65	1.52305e-64	107.327	Sig.
8835	CATTGAGATAGTGTGGGGAA	CATTGAGATAGTGGGGGGAAGGG	1225	12	0.979592	1132	5	0.441696	0.147317	0.208585	2.2178	NS
8836	CATTGAGATAGTGTGGGGAA	CATTGAGATAGTGCGGGGAAGGG	3456	150	4.34028	3947	5	0.126678	2.48524e-43	1.1065e-42	34.2622	Sig.
8837	CATTGAGATAGTGTGGGGAA	CATTGAGATAGTGTAGGGAAGGG	1813	514	28.3508	2150	9	0.418605	3.19788e-178	3.68977e-177	67.7269	Sig.
8838	CATTGAGATAGTGTGGGGAA	CATTGAGATAGTGTCGGGAAGGG	2632	61	2.31763	2742	2	0.0729395	6.31549e-17	2.06588e-16	31.7747	Sig.
8839	CATTGAGATAGTGTGGGGAA	CATTGAGATAGTGTTGGGAAGGG	1990	44	2.21106	2020	3	0.148515	8.20849e-11	2.3255e-10	14.8878	Sig.
8840	CATTGAGATAGTGTGGGGAA	CATTGAGATAGTGTGAGGAAGGG	1501	368	24.517	1528	1	0.065445	7.14105e-122	5.6741e-121	374.62	Sig.
8841	CATTGAGATAGTGTGGGGAA	CATTGAGATAGTGTGCGGAAGGG	2347	42	1.78952	2519	5	0.198491	3.18507e-09	8.58156e-09	9.01559	Sig.
8842	CATTGAGATAGTGTGGGGAA	CATTGAGATAGTGTGTGGAAGGG	1249	3	0.240192	1000	2	0.2	1	1	1.20096	NS
8843	CATTGAGATAGTGTGGGGAA	CATTGAGATAGTGTGGAGAAGGG	1491	599	40.1744	1763	1	0.0567215	1.20892e-236	1.99787e-235	708.274	Sig.
8844	CATTGAGATAGTGTGGGGAA	CATTGAGATAGTGTGGCGAAGGG	1384	29	2.09538	1364	1	0.0733138	5.1263e-08	1.30894e-07	28.5809	Sig.
8845	CATTGAGATAGTGTGGGGAA	CATTGAGATAGTGTGGTGAAGGG	1045	115	11.0048	1059	9	0.849858	2.67618e-26	1.0105e-25	12.949	Sig.
8846	CATTGAGATAGTGTGGGGAA	CATTGAGATAGTGTGGGAAAGGG	2522	866	34.3378	2512	0	0	8.34613e-300	2.04233e-298	10000000000	Sig.
8847	CATTGAGATAGTGTGGGGAA	CATTGAGATAGTGTGGGCAAGGG	1255	141	11.2351	1257	4	0.318218	7.28891e-39	3.13667e-38	35.3062	Sig.
8848	CATTGAGATAGTGTGGGGAA	CATTGAGATAGTGTGGGTAAGGG	2356	600	25.4669	2561	2	0.0780945	1.95565e-207	2.69795e-206	326.104	Sig.
8849	CATTGAGATAGTGTGGGGAA	CATTGAGATAGTGTGGGGGAGGG	1188	124	10.4377	1090	4	0.366972	3.15358e-31	1.25392e-30	28.4428	Sig.
8850	CATTGAGATAGTGTGGGGAA	CATTGAGATAGTGTGGGGCAGGG	1854	117	6.31068	2014	1	0.0496524	3.83341e-37	1.62179e-36	127.097	Sig.
8851	CATTGAGATAGTGTGGGGAA	CATTGAGATAGTGTGGGGTAGGG	2182	691	31.6682	2122	12	0.565504	8.03129e-210	1.12924e-208	55.9999	Sig.
8852	CATTGAGATAGTGTGGGGAA	CATTGAGATAGTGTGGGGAGGGG	1115	390	34.9776	1162	0	0	4.84212e-140	4.34832e-139	10000000000	Sig.
8853	CATTGAGATAGTGTGGGGAA	CATTGAGATAGTGTGGGGACGGG	1712	157	9.17056	2127	16	0.752233	3.43885e-39	1.48725e-38	12.1911	Sig.
8854	CATTGAGATAGTGTGGGGAA	CATTGAGATAGTGTGGGGATGGG	2908	741	25.4814	3757	7	0.186319	5.34295e-279	1.1378e-277	136.762	Sig.

## Sheet: Data 5.4 libC-AMM
gp	AG	AC	AT
GGCGGGTGGATCACGAGTTC-N10	2.08105	1.91304	4.96324
GGAGTCACATGGGAGTCACA-N3	84.1939	38.3182	71.1042
GGAGTCACATGGGAGTCACA-N7	78.9056	79.5197	75.4002
GGAGTCACATGGGAGTCACA-N9	80.778	79.1009	69.0691
GGAGTCACATGGGAGTCACA-N14	39.5859	20.9725	35.9532
GGAGTCACATGGGAGTCACA-N18	40.6513	60.6178	64.83
GGAGTCACATGGGAGTCACA-N20	48.271	50.5284	66.0714
GTACAAGGACCGACAAGGGT-N3	35.7733	14.7025	47.929
GTACAAGGACCGACAAGGGT-N6	75.0509	59.4771	64.8098
GTACAAGGACCGACAAGGGT-N9	58.0846	49.0583	36.2212
GTACAAGGACCGACAAGGGT-N13	70.1754	56.6688	63.6719
GTACAAGGACCGACAAGGGT-N15	70.7753	55.641	52.0451
GTACAAGGACCGACAAGGGT-N16	63.9692	8.15109	6.66667
TGACATCAATTATTATACAT-N5	1.89087	0.116822	0.140121
TGACATCAATTATTATACAT-N8	0.0701262	0.246305	0.0749625
TGACATCAATTATTATACAT-N9	4.92572	0.540906	0.387188
TGACATCAATTATTATACAT-N12	0.945423	0.44843	0.498132
TGACATCAATTATTATACAT-N15	0.111857	0.931677	0.671551
TGACATCAATTATTATACAT-N17	0.924214	0.44843	0.0570451
TGACATCAATTATTATACAT-N19	1.10216	4.21456	9.44206
GCGTGACTTCCACATGAGCG-N6	39.0149	9.95945	15.9718
GCGTGACTTCCACATGAGCG-N12	8.92484	3.57349	1.89412
GCGTGACTTCCACATGAGCG-N14	3.33543	4.84581	17.3794
GCGTGACTTCCACATGAGCG-N17	16.6667	3.61783	2.0184
CATTGAGATAGTGTGGGGAA-N2	24.1451	32.5	24.1309
CATTGAGATAGTGTGGGGAA-N6	13.621	23.1993	10.7567
CATTGAGATAGTGTGGGGAA-N8	15.3812	21.1329	8.79285
CATTGAGATAGTGTGGGGAA-N10	19.9868	13.6162	11.2479
CATTGAGATAGTGTGGGGAA-N19	10.4377	6.31068	31.6682
CATTGAGATAGTGTGGGGAA-N20	34.9776	9.17056	25.4814

## Sheet: Data 5.5 libC-TMM
gp	TA	TG	TC
GGCGGGTGGATCACGAGTTC-N11	3.97946	1.37931	1.21951
GGAGTCACATGGGAGTCACA-N5	78.352	83.7488	72.4806
GGAGTCACATGGGAGTCACA-N10	78.032	74.3686	80.6748
GGAGTCACATGGGAGTCACA-N16	67.8483	45.3459	58.6777
GTACAAGGACCGACAAGGGT-N20	25.5289	36.5325	43.9502
TGACATCAATTATTATACAT-N1	42.0904	23.5975	17.0435
TGACATCAATTATTATACAT-N6	6.14417	5.74621	25.889
TGACATCAATTATTATACAT-N10	3.72521	3.24797	1.4553
TGACATCAATTATTATACAT-N11	1.43319	2.42537	2.70747
TGACATCAATTATTATACAT-N13	1.23935	2.05479	17.4788
TGACATCAATTATTATACAT-N14	0.151286	0.246914	0.218341
TGACATCAATTATTATACAT-N16	0.794913	1.68539	1.81635
TGACATCAATTATTATACAT-N20	2.35405	0.544662	0.558214
GCGTGACTTCCACATGAGCG-N4	10.4844	29.6933	17.5866
GCGTGACTTCCACATGAGCG-N8	16.3407	16.1319	74.2857
GCGTGACTTCCACATGAGCG-N9	41.2615	25.4658	64.8741
GCGTGACTTCCACATGAGCG-N15	22.4719	3.31969	6.37312
CATTGAGATAGTGTGGGGAA-N4	14.9859	31.2578	11.5861
CATTGAGATAGTGTGGGGAA-N9	18.6728	12.6331	31.921
CATTGAGATAGTGTGGGGAA-N14	11.3454	0.979592	4.34028

## Sheet: Data 5.6 libC-CMM
gp	CA	CG	CT
GGCGGGTGGATCACGAGTTC-N3	12.1324	8.03815	12.2172
GGCGGGTGGATCACGAGTTC-N12	6.38051	0.683761	0
GGCGGGTGGATCACGAGTTC-N14	1.67598	0	2.77778
GGAGTCACATGGGAGTCACA-N6	69.7376	78.2936	77.2124
GGAGTCACATGGGAGTCACA-N8	74.5779	77.4295	66.3049
GGAGTCACATGGGAGTCACA-N17	63.1675	25.8735	54.6816
GGAGTCACATGGGAGTCACA-N19	36.77	27.7108	55.0102
GTACAAGGACCGACAAGGGT-N10	46.7312	56.4706	80.0532
GTACAAGGACCGACAAGGGT-N11	71.3587	56.7335	78.7115
GTACAAGGACCGACAAGGGT-N14	26.5027	8.68075	70.9091
TGACATCAATTATTATACAT-N7	2.46085	0.0489476	1.63831
TGACATCAATTATTATACAT-N18	1.84659	0.515464	2.01889
GCGTGACTTCCACATGAGCG-N2	23.9478	86.1046	45.4947
GCGTGACTTCCACATGAGCG-N10	6.44208	1.49485	29.1181
GCGTGACTTCCACATGAGCG-N11	5.95238	0.216216	13.4128
GCGTGACTTCCACATGAGCG-N13	2.34079	4.79339	20.1515
GCGTGACTTCCACATGAGCG-N19	13.2027	7.9096	25.2336
CATTGAGATAGTGTGGGGAA-N1	53.2446	53.9303	51.3431

## Sheet: Data 5.7 libC-GMM
gp	GA	GC	GT
GGCGGGTGGATCACGAGTTC-N1	14.4377	10.6788	9.3199
GGCGGGTGGATCACGAGTTC-N5	1.27273	0.34965	0.178571
GGCGGGTGGATCACGAGTTC-N8	4.35374	0.70713	3.14136
GGCGGGTGGATCACGAGTTC-N9	0.396432	0	0.822368
GGCGGGTGGATCACGAGTTC-N15	2.97398	0	0
GGCGGGTGGATCACGAGTTC-N17	3.25983	0	1.0582
GGAGTCACATGGGAGTCACA-N1	78.6903	83.1579	89.948
GGAGTCACATGGGAGTCACA-N2	66.8527	76.1777	67.638
GGAGTCACATGGGAGTCACA-N4	75.8114	59.1667	71.2072
GGAGTCACATGGGAGTCACA-N11	89.4052	56.5817	51.7714
GGAGTCACATGGGAGTCACA-N12	80.3898	43.021	30.3306
GGAGTCACATGGGAGTCACA-N13	76.386	43.5294	32.7149
GGAGTCACATGGGAGTCACA-N15	70.3911	49.1647	22.8659
GTACAAGGACCGACAAGGGT-N18	63.9613	44.2029	53.9101
TGACATCAATTATTATACAT-N2	8.70951	4.06343	10.6205
GCGTGACTTCCACATGAGCG-N1	63.5262	25	34.8646
GCGTGACTTCCACATGAGCG-N3	19.3313	4.64055	7.97604
GCGTGACTTCCACATGAGCG-N5	19.3287	21.9044	8.01068
GCGTGACTTCCACATGAGCG-N16	30.8627	0.318195	0.577617
GCGTGACTTCCACATGAGCG-N18	29.172	21.2097	22.6727
GCGTGACTTCCACATGAGCG-N20	37.0415	14.9183	38.9575
CATTGAGATAGTGTGGGGAA-N5	12.6814	8.14948	8.56663
CATTGAGATAGTGTGGGGAA-N7	21.3736	17.0407	13.0547
CATTGAGATAGTGTGGGGAA-N13	28.7971	14.3939	8.03456
CATTGAGATAGTGTGGGGAA-N15	28.3508	2.31763	2.21106
CATTGAGATAGTGTGGGGAA-N16	24.517	1.78952	0.240192
CATTGAGATAGTGTGGGGAA-N17	40.1744	2.09538	11.0048
CATTGAGATAGTGTGGGGAA-N18	34.3378	11.2351	25.4669
