# Supplementary material for: Massively Targeted Evaluation of Therapeutic CRISPR Off-Targets in Cells
Source: Research Square preprint supplement (doi:10.21203/rs.3.rs-1427273/v1), 2022-03-17
Supplement: Supplementary file 6 [file Supplementary Data 6.xlsx]

## Sheet: Sheet1
Primer Name	Sequence(5’-3’)		amplicon size
SURRO(BsmBI GGA)-F	TACAGCTaccacgtctcaCACC		184 bp
SURRO(BsmBI GGA)-R	AGCACAAccgtcgtctccAAAC
SURRO-NGS-F1	GGACTATCATATGCTTACCGTA		280 bp
SURRO-NGS-R1	ACTCCTTTCAAGACCTAGCTAG
RGN11179-ON-F	CTAATCTGTTTCTCCACTTCCG		236 bp
RGN11179-ON-R	GGAAGATTCATAGCAGAGGGC
OT4708-F	GCTGTGAAGGTTGCTGTTCCTC		287 bp
OT4708-R	CCAGAATCTGTTCCAGAGCGTG
OT4729-F	GGCACTGTTACTGACAGCCATC		210 bp
OT4729-R	GAGGTTGGAGCAGCTCATAGC
RGN11237-ON-F	CATGAAGCCGGGGCCGCCGCA		243 bp
RGN11237-ON-R	GAGGGAGCGGGGTCCCGGA
OT9490-F	GCACCTGGACTGATCATCTTAG		228 bp
OT9490-R	GGATGAATGCATGCATGCACG
OT9506-F	TGAGCCCGCCGCGATGGGAGC		192 bp
OT9506-R	GCCGTTCCAGCCGCCCAAACCC
RGN11189-ON-F	GAGGAGGCTGTGCGTGTGAGCTG		228 bp
RGN11189-ON-R	CGCAATCCCCAATCCGCTGCAG
OT5595-F	GCAGATAGATGAAGGGAACC		239 bp
OT5595-R	CTCGGATGGTACCACTAGGTTC
OT5600-F	CTCCTTCCCATCTAAGCTGC		278 bp
OT5600-R	CTAGGACCCTTCCCTCTGTCTG
OT5675-F	GACAGTCGGCAGAGAAAGAGAG		230 bp
OT5675-R	GTTGGCTCCTACCTAGGAGTG
OT5679-F	GATCAAAGCAGTTGATACTACC		196 bp
OT5679-R	CTCCTGATACGATGTTGATGG
RGN11184-ON-F	GTGTCAGGTGTGTGAGTAGTG		248 bp
RGN11184-ON-R	CTTCCCTTCTACCTATTTGGC
OT5029-F	GTGGAGAAGGATTACCTTCTGG		236 bp
OT5029-R	CAGCCACATGGAACCATAAGTC
OT5032-F	GTGGACAAAGAGAGTGTGGTAC		239 bp
OT5032-R	GATGTTGAGTCATGTGGGTCATG
OT5035-F	GACCTCATCGATGCTCCCATTC		187 bp
OT5035-R	GATCTCTGGGGATAGTCCTCTC
RGN11208-ON-F	GCACAGGATGTGACATGGAAGG		258 bp
RGN11208-ON-R	GCTTAGGAACCTCAGTCTCAGG
OT6791-F	CAGACAAGTACCACTCCGTGTG		165 bp
OT6791-R	CAGGGCTGCATTGCAGAATC
OT6832-F	CAGAGAAGTGCTTAAAGGAGC		246 bp
OT6832-R	CAGGTACACCAATCAGACGTAG
OT6873-F	GGAGCTGATAGGGCTGAAAG		223 bp
OT6873-R	GCAATCAGGCGTAGATTGGGTC
VEGFA site 2-ON-F	GAAGCGAGAACAGCCCAGAAG		282 bp
VEGFA site 2-ON-R	AGGGGCAAAGTGAGTGACCTG
OT11510-F	GTCACTTGCAACCTGCTAACC		235 bp
OT11510-R	GACTAGGGTTAGGCGTAGAAC
HEK293T site 4-ON-F	CAGAGGGTCCAAAGCAGGATG		272 bp
HEK293T site 4-ON-R	GGCCAGTGAAATCACCCTG
OT11414-F	CAGGCCTCTCCTTTCCAAGGTC		186 bp
OT11414-R	GGCCAGTTCTATGACCTCCTC
OT11458-F	GTTCTCTTGGCAATGCAGCCTG		193 bp
OT11458-R	AGCAGGTGGACAGTCTCTGC
OT11437-F	CTGACTGCCCTTCTTCTGGAG		193 bp
OT11437-R	GACAAACATCCCCTGTGGCAG

## Sheet: Sheet2
RGN11179-ON	F	RGN11179-ON-F
RGN11179-ON	R	RGN11179-ON-R
OT4708	F	OT4708-F
OT4708	R	OT4708-R
OT4729	F	OT4729-F
OT4729	R	OT4729-R
RGN11237-ON	F	RGN11237-ON-F
RGN11237-ON	R	RGN11237-ON-R
OT9490	F	OT9490-F
OT9490	R	OT9490-R
OT9506	F	OT9506-F
OT9506	R	OT9506-R
RGN11189-ON	F	RGN11189-ON-F
RGN11189-ON	R	RGN11189-ON-R
OT5595	F	OT5595-F
OT5595	R	OT5595-R
OT5600	F	OT5600-F
OT5600	R	OT5600-R
OT5675	F	OT5675-F
OT5675	R	OT5675-R
OT5679	F	OT5679-F
OT5679	R	OT5679-R
RGN11184-ON	F	RGN11184-ON-F
RGN11184-ON	R	RGN11184-ON-R
OT5029	F	OT5029-F
OT5029	R	OT5029-R
OT5032	F	OT5032-F
OT5032	R	OT5032-R
OT5035	F	OT5035-F
OT5035	R	OT5035-R
RGN11208-ON	F	RGN11208-ON-F
RGN11208-ON	R	RGN11208-ON-R
OT6791	F	OT6791-F
OT6791	R	OT6791-R
OT6832	F	OT6832-F
OT6832	R	OT6832-R
OT6873	F	OT6873-F
OT6873	R	OT6873-R
VEGFA site 2-ON	F	VEGFA site 2-ON-F
VEGFA site 2-ON	R	VEGFA site 2-ON-R
OT11291	F	OT11291-F
OT11291	R	OT11291-R
OT11290	F	OT11290-F
OT11290	R	OT11290-R
OT11296	F	OT11296-F
OT11296	R	OT11296-R
OT11510	F	OT11510-F
OT11510	R	OT11510-R
HEK293T site 4-ON	F	HEK293T site 4-ON-F
HEK293T site 4-ON	R	HEK293T site 4-ON-R
OT11397	F	OT11397-F
OT11397	R	OT11397-R
OT11398	F	OT11398-F
OT11398	R	OT11398-R
OT11414	F	OT11414-F
OT11414	R	OT11414-R
OT11458	F	OT11458-F
OT11458	R	OT11458-R
OT11437	F	OT11437-F
OT11437	R	OT11437-R
