# Supplementary material for: Massively Targeted Evaluation of Therapeutic CRISPR Off-Targets in Cells
Source: Research Square preprint supplement (doi:10.21203/rs.3.rs-1427273/v1), 2022-03-17
Supplement: Supplementary file 7 [file Supplementary Data 7.xlsx]

## Sheet: Sheet1
Project acession	sample acession	experiment accession	run accession	sample name	file name
CNP0001979	CNS0388051	CNX0396663	CNR0478252	LibA(gRNA11367)_spCas9.fq.gz	LibA_EMX1(gRNA11367)_spCas9.fq.gz
CNP0001979	CNS0388052	CNX0396664	CNR0478253	LibA(gRNA11376)_spCas9.fq.gz	LibA_FANCF(gRNA11376)_spCas9.fq.gz
CNP0001979	CNS0388053	CNX0396665	CNR0478254	LibA(gRNA11259)_spCas9.fq.gz	LibA_HBB-site1(gRNA11259)_spCas9.fq.gz
CNP0001979	CNS0388054	CNX0396666	CNR0478255	LibA(gRNA11464)_spCas9.fq.gz	LibA_HBB-site2(gRNA11464)_spCas9.fq.gz
CNP0001979	CNS0388055	CNX0396667	CNR0478256	LibA(gRNA11471)_spCas9.fq.gz	LibA_HEK293-site2(gRNA11471)_spCas9.fq.gz
CNP0001979	CNS0388056	CNX0396668	CNR0478257	LibA(gRNA11386)_spCas9.fq.gz	LibA_HEK293-site3(gRNA11386)_spCas9.fq.gz
CNP0001979	CNS0388057	CNX0396669	CNR0478258	LibA(gRNA11390)_spCas9.fq.gz	LibA_HEK293-site4(gRNA11390)_spCas9.fq.gz
CNP0001979	CNS0388058	CNX0396670	CNR0478259	LibA(gRNA11382)_spCas9.fq.gz	LibA_HEK293_sgRNA1(gRNA11382)_spCas9.fq.gz
CNP0001979	CNS0388059	CNX0396671	CNR0478260	LibA(gRNA11297)_spCas9.fq.gz	LibA_T3-ontarget(gRNA11297)_spCas9.fq.gz
CNP0001979	CNS0388060	CNX0396672	CNR0478261	LibA(gRNA11279)_spCas9.fq.gz	LibA_VEGFA-site1(gRNA11279)_spCas9.fq.gz
CNP0001979	CNS0388061	CNX0396673	CNR0478262	LibA(gRNA11284)_spCas9.fq.gz	LibA_VEGFA-site2(gRNA11284)_spCas9.fq.gz
CNP0001979	CNS0388173	CNX0396785	CNR0478374	LibA(gRNA11367)_MOCK.fq.gz	LibA_EMX1(gRNA11367)_MOCK.fq.gz
CNP0001979	CNS0388174	CNX0396786	CNR0478375	LibA(gRNA11376)_MOCK.fq.gz	LibA_FANCF(gRNA11376)_MOCK.fq.gz
CNP0001979	CNS0388175	CNX0396787	CNR0478376	LibA(gRNA11259)_MOCK.fq.gz	LibA_HBB-site1(gRNA11259)_MOCK.fq.gz
CNP0001979	CNS0388176	CNX0396788	CNR0478377	LibA(gRNA11464)_MOCK.fq.gz	LibA_HBB-site2(gRNA11464)_MOCK.fq.gz
CNP0001979	CNS0388177	CNX0396789	CNR0478378	LibA(gRNA11471)_MOCK.fq.gz	LibA_HEK293-site2(gRNA11471)_MOCK.fq.gz
CNP0001979	CNS0388178	CNX0396790	CNR0478379	LibA(gRNA11386)_MOCK.fq.gz	LibA_HEK293-site3(gRNA11386)_MOCK.fq.gz
CNP0001979	CNS0388179	CNX0396791	CNR0478380	LibA(gRNA11390)_MOCK.fq.gz	LibA_HEK293-site4(gRNA11390)_MOCK.fq.gz
CNP0001979	CNS0388180	CNX0396792	CNR0478381	LibA(gRNA11382)_MOCK.fq.gz	LibA_HEK293_sgRNA1(gRNA11382)_MOCK.fq.gz
CNP0001979	CNS0388181	CNX0396793	CNR0478382	LibA(gRNA11297)_MOCK.fq.gz	LibA_T3-ontarget(gRNA11297)_MOCK.fq.gz
CNP0001979	CNS0388182	CNX0396794	CNR0478383	LibA(gRNA11279)_MOCK.fq.gz	LibA_VEGFA-site1(gRNA11279)_MOCK.fq.gz
CNP0001979	CNS0388183	CNX0396795	CNR0478384	LibA(gRNA11284)_MOCK.fq.gz	LibA_VEGFA-site2(gRNA11284)_MOCK.fq.gz
CNP0001979	CNS0388062	CNX0396674	CNR0478263	LibB(gRNA11241)_spCas9.fq.gz	LibB_B2M(gRNA11241)_spCas9.fq.gz
CNP0001979	CNS0388063	CNX0396675	CNR0478264	LibB(gRNA11182)_spCas9.fq.gz	LibB_BCL11A(gRNA11182)_spCas9.fq.gz
CNP0001979	CNS0388064	CNX0396676	CNR0478265	LibB(gRNA11183)_spCas9.fq.gz	LibB_BCL11A(gRNA11183)_spCas9.fq.gz
CNP0001979	CNS0388065	CNX0396677	CNR0478266	LibB(gRNA11184)_spCas9.fq.gz	LibB_BCL11A(gRNA11184)_spCas9.fq.gz
CNP0001979	CNS0388066	CNX0396678	CNR0478267	LibB(gRNA11185)_spCas9.fq.gz	LibB_BCL11A(gRNA11185)_spCas9.fq.gz
CNP0001979	CNS0388067	CNX0396679	CNR0478268	LibB(gRNA11186)_spCas9.fq.gz	LibB_BCL11A(gRNA11186)_spCas9.fq.gz
CNP0001979	CNS0388068	CNX0396680	CNR0478269	LibB(gRNA11187)_spCas9.fq.gz	LibB_BCL11A(gRNA11187)_spCas9.fq.gz
CNP0001979	CNS0388069	CNX0396681	CNR0478270	LibB(gRNA11188)_spCas9.fq.gz	LibB_BCL11A(gRNA11188)_spCas9.fq.gz
CNP0001979	CNS0388070	CNX0396682	CNR0478271	LibB(gRNA11156)_spCas9.fq.gz	LibB_CCR5(gRNA11156)_spCas9.fq.gz
CNP0001979	CNS0388071	CNX0396683	CNR0478272	LibB(gRNA11157)_spCas9.fq.gz	LibB_CCR5(gRNA11157)_spCas9.fq.gz
CNP0001979	CNS0388072	CNX0396684	CNR0478273	LibB(gRNA11161)_spCas9.fq.gz	LibB_CCR5(gRNA11161)_spCas9.fq.gz
CNP0001979	CNS0388073	CNX0396685	CNR0478274	LibB(gRNA11162)_spCas9.fq.gz	LibB_CCR5(gRNA11162)_spCas9.fq.gz
CNP0001979	CNS0388074	CNX0396686	CNR0478275	LibB(gRNA11163)_spCas9.fq.gz	LibB_CCR5(gRNA11163)_spCas9.fq.gz
CNP0001979	CNS0388075	CNX0396687	CNR0478276	LibB(gRNA11164)_spCas9.fq.gz	LibB_CCR5(gRNA11164)_spCas9.fq.gz
CNP0001979	CNS0388076	CNX0396688	CNR0478277	LibB(gRNA11165)_spCas9.fq.gz	LibB_CCR5(gRNA11165)_spCas9.fq.gz
CNP0001979	CNS0388077	CNX0396689	CNR0478278	LibB(gRNA11166)_spCas9.fq.gz	LibB_CCR5(gRNA11166)_spCas9.fq.gz
CNP0001979	CNS0388078	CNX0396690	CNR0478279	LibB(gRNA11167)_spCas9.fq.gz	LibB_CCR5(gRNA11167)_spCas9.fq.gz
CNP0001979	CNS0388079	CNX0396691	CNR0478280	LibB(gRNA11168)_spCas9.fq.gz	LibB_CCR5(gRNA11168)_spCas9.fq.gz
CNP0001979	CNS0388080	CNX0396692	CNR0478281	LibB(gRNA11169)_spCas9.fq.gz	LibB_CCR5(gRNA11169)_spCas9.fq.gz
CNP0001979	CNS0388081	CNX0396693	CNR0478282	LibB(gRNA11170)_spCas9.fq.gz	LibB_CCR5(gRNA11170)_spCas9.fq.gz
CNP0001979	CNS0388082	CNX0396694	CNR0478283	LibB(gRNA11171)_spCas9.fq.gz	LibB_CCR5(gRNA11171)_spCas9.fq.gz
CNP0001979	CNS0388083	CNX0396695	CNR0478284	LibB(gRNA11173)_spCas9.fq.gz	LibB_CCR5(gRNA11173)_spCas9.fq.gz
CNP0001979	CNS0388084	CNX0396696	CNR0478285	LibB(gRNA11174)_spCas9.fq.gz	LibB_CCR5(gRNA11174)_spCas9.fq.gz
CNP0001979	CNS0388085	CNX0396697	CNR0478286	LibB(gRNA11175)_spCas9.fq.gz	LibB_CCR5(gRNA11175)_spCas9.fq.gz
CNP0001979	CNS0388086	CNX0396698	CNR0478287	LibB(gRNA11145)_spCas9.fq.gz	LibB_CEP290(gRNA11145)_spCas9.fq.gz
CNP0001979	CNS0388087	CNX0396699	CNR0478288	LibB(gRNA11158)_spCas9.fq.gz	LibB_CXCR4(gRNA11158)_spCas9.fq.gz
CNP0001979	CNS0388088	CNX0396700	CNR0478289	LibB(gRNA11159)_spCas9.fq.gz	LibB_CXCR4(gRNA11159)_spCas9.fq.gz
CNP0001979	CNS0388089	CNX0396701	CNR0478290	LibB(gRNA11160)_spCas9.fq.gz	LibB_CXCR4(gRNA11160)_spCas9.fq.gz
CNP0001979	CNS0388090	CNX0396702	CNR0478291	LibB(gRNA11172)_spCas9.fq.gz	LibB_CXCR4(gRNA11172)_spCas9.fq.gz
CNP0001979	CNS0388091	CNX0396703	CNR0478292	LibB(gRNA11195)_spCas9.fq.gz	LibB_DMD(gRNA11195)_spCas9.fq.gz
CNP0001979	CNS0388092	CNX0396704	CNR0478293	LibB(gRNA11196)_spCas9.fq.gz	LibB_DMD(gRNA11196)_spCas9.fq.gz
CNP0001979	CNS0388093	CNX0396705	CNR0478294	LibB(gRNA11197)_spCas9.fq.gz	LibB_DMD(gRNA11197)_spCas9.fq.gz
CNP0001979	CNS0388094	CNX0396706	CNR0478295	LibB(gRNA11198)_spCas9.fq.gz	LibB_DMD(gRNA11198)_spCas9.fq.gz
CNP0001979	CNS0388095	CNX0396707	CNR0478296	LibB(gRNA11199)_spCas9.fq.gz	LibB_DMD(gRNA11199)_spCas9.fq.gz
CNP0001979	CNS0388096	CNX0396708	CNR0478297	LibB(gRNA11200)_spCas9.fq.gz	LibB_DMD(gRNA11200)_spCas9.fq.gz
CNP0001979	CNS0388097	CNX0396709	CNR0478298	LibB(gRNA11201)_spCas9.fq.gz	LibB_DMD(gRNA11201)_spCas9.fq.gz
CNP0001979	CNS0388098	CNX0396710	CNR0478299	LibB(gRNA11202)_spCas9.fq.gz	LibB_DMD(gRNA11202)_spCas9.fq.gz
CNP0001979	CNS0388099	CNX0396711	CNR0478300	LibB(gRNA11203)_spCas9.fq.gz	LibB_DMD(gRNA11203)_spCas9.fq.gz
CNP0001979	CNS0388100	CNX0396712	CNR0478301	LibB(gRNA11204)_spCas9.fq.gz	LibB_DMD(gRNA11204)_spCas9.fq.gz
CNP0001979	CNS0388101	CNX0396713	CNR0478302	LibB(gRNA11205)_spCas9.fq.gz	LibB_DMD(gRNA11205)_spCas9.fq.gz
CNP0001979	CNS0388102	CNX0396714	CNR0478303	LibB(gRNA11206)_spCas9.fq.gz	LibB_DMD(gRNA11206)_spCas9.fq.gz
CNP0001979	CNS0388103	CNX0396715	CNR0478304	LibB(gRNA11207)_spCas9.fq.gz	LibB_DMD(gRNA11207)_spCas9.fq.gz
CNP0001979	CNS0388104	CNX0396716	CNR0478305	LibB(gRNA11208)_spCas9.fq.gz	LibB_DMD(gRNA11208)_spCas9.fq.gz
CNP0001979	CNS0388105	CNX0396717	CNR0478306	LibB(gRNA11209)_spCas9.fq.gz	LibB_DMD(gRNA11209)_spCas9.fq.gz
CNP0001979	CNS0388106	CNX0396718	CNR0478307	LibB(gRNA11210)_spCas9.fq.gz	LibB_DMD(gRNA11210)_spCas9.fq.gz
CNP0001979	CNS0388107	CNX0396719	CNR0478308	LibB(gRNA11211)_spCas9.fq.gz	LibB_DMD(gRNA11211)_spCas9.fq.gz
CNP0001979	CNS0388108	CNX0396720	CNR0478309	LibB(gRNA11212)_spCas9.fq.gz	LibB_DMD(gRNA11212)_spCas9.fq.gz
CNP0001979	CNS0388109	CNX0396721	CNR0478310	LibB(gRNA11213)_spCas9.fq.gz	LibB_DMD(gRNA11213)_spCas9.fq.gz
CNP0001979	CNS0388110	CNX0396722	CNR0478311	LibB(gRNA11214)_spCas9.fq.gz	LibB_DMD(gRNA11214)_spCas9.fq.gz
CNP0001979	CNS0388111	CNX0396723	CNR0478312	LibB(gRNA11215)_spCas9.fq.gz	LibB_DMD(gRNA11215)_spCas9.fq.gz
CNP0001979	CNS0388112	CNX0396724	CNR0478313	LibB(gRNA11216)_spCas9.fq.gz	LibB_DMD(gRNA11216)_spCas9.fq.gz
CNP0001979	CNS0388113	CNX0396725	CNR0478314	LibB(gRNA11217)_spCas9.fq.gz	LibB_DMD(gRNA11217)_spCas9.fq.gz
CNP0001979	CNS0388114	CNX0396726	CNR0478315	LibB(gRNA11218)_spCas9.fq.gz	LibB_DMD(gRNA11218)_spCas9.fq.gz
CNP0001979	CNS0388115	CNX0396727	CNR0478316	LibB(gRNA11219)_spCas9.fq.gz	LibB_DMD(gRNA11219)_spCas9.fq.gz
CNP0001979	CNS0388116	CNX0396728	CNR0478317	LibB(gRNA11220)_spCas9.fq.gz	LibB_DMD(gRNA11220)_spCas9.fq.gz
CNP0001979	CNS0388117	CNX0396729	CNR0478318	LibB(gRNA11221)_spCas9.fq.gz	LibB_DMD(gRNA11221)_spCas9.fq.gz
CNP0001979	CNS0388118	CNX0396730	CNR0478319	LibB(gRNA11222)_spCas9.fq.gz	LibB_DMD(gRNA11222)_spCas9.fq.gz
CNP0001979	CNS0388119	CNX0396731	CNR0478320	LibB(gRNA11223)_spCas9.fq.gz	LibB_DMD(gRNA11223)_spCas9.fq.gz
CNP0001979	CNS0388120	CNX0396732	CNR0478321	LibB(gRNA11224)_spCas9.fq.gz	LibB_DMD(gRNA11224)_spCas9.fq.gz
CNP0001979	CNS0388121	CNX0396733	CNR0478322	LibB(gRNA11225)_spCas9.fq.gz	LibB_DMD(gRNA11225)_spCas9.fq.gz
CNP0001979	CNS0388122	CNX0396734	CNR0478323	LibB(gRNA11226)_spCas9.fq.gz	LibB_DMD(gRNA11226)_spCas9.fq.gz
CNP0001979	CNS0388123	CNX0396735	CNR0478324	LibB(gRNA11227)_spCas9.fq.gz	LibB_DMD(gRNA11227)_spCas9.fq.gz
CNP0001979	CNS0388124	CNX0396736	CNR0478325	LibB(gRNA11228)_spCas9.fq.gz	LibB_DMD(gRNA11228)_spCas9.fq.gz
CNP0001979	CNS0388125	CNX0396737	CNR0478326	LibB(gRNA11229)_spCas9.fq.gz	LibB_DMD(gRNA11229)_spCas9.fq.gz
CNP0001979	CNS0388126	CNX0396738	CNR0478327	LibB(gRNA11230)_spCas9.fq.gz	LibB_DMD(gRNA11230)_spCas9.fq.gz
CNP0001979	CNS0388127	CNX0396739	CNR0478328	LibB(gRNA11231)_spCas9.fq.gz	LibB_DMD(gRNA11231)_spCas9.fq.gz
CNP0001979	CNS0388128	CNX0396740	CNR0478329	LibB(gRNA11232)_spCas9.fq.gz	LibB_DMD(gRNA11232)_spCas9.fq.gz
CNP0001979	CNS0388129	CNX0396741	CNR0478330	LibB(gRNA11233)_spCas9.fq.gz	LibB_DMD(gRNA11233)_spCas9.fq.gz
CNP0001979	CNS0388130	CNX0396742	CNR0478331	LibB(gRNA11234)_spCas9.fq.gz	LibB_DMD(gRNA11234)_spCas9.fq.gz
CNP0001979	CNS0388131	CNX0396743	CNR0478332	LibB(gRNA11244)_spCas9.fq.gz	LibB_FAS(gRNA11244)_spCas9.fq.gz
CNP0001979	CNS0388132	CNX0396744	CNR0478333	LibB(gRNA11176)_spCas9.fq.gz	LibB_HBB(gRNA11176)_spCas9.fq.gz
CNP0001979	CNS0388133	CNX0396745	CNR0478334	LibB(gRNA11177)_spCas9.fq.gz	LibB_HBB(gRNA11177)_spCas9.fq.gz
CNP0001979	CNS0388134	CNX0396746	CNR0478335	LibB(gRNA11178)_spCas9.fq.gz	LibB_HBB(gRNA11178)_spCas9.fq.gz
CNP0001979	CNS0388135	CNX0396747	CNR0478336	LibB(gRNA11179)_spCas9.fq.gz	LibB_HBB(gRNA11179)_spCas9.fq.gz
CNP0001979	CNS0388136	CNX0396748	CNR0478337	LibB(gRNA11181)_spCas9.fq.gz	LibB_HBB(gRNA11181)_spCas9.fq.gz
CNP0001979	CNS0388137	CNX0396749	CNR0478338	LibB(gRNA11189)_spCas9.fq.gz	LibB_HBB(gRNA11189)_spCas9.fq.gz
CNP0001979	CNS0388138	CNX0396750	CNR0478339	LibB(gRNA11192)_spCas9.fq.gz	LibB_HBB(gRNA11192)_spCas9.fq.gz
CNP0001979	CNS0388139	CNX0396751	CNR0478340	LibB(gRNA11146)_spCas9.fq.gz	LibB_HTT(gRNA11146)_spCas9.fq.gz
CNP0001979	CNS0388140	CNX0396752	CNR0478341	LibB(gRNA11147)_spCas9.fq.gz	LibB_HTT(gRNA11147)_spCas9.fq.gz
CNP0001979	CNS0388141	CNX0396753	CNR0478342	LibB(gRNA11148)_spCas9.fq.gz	LibB_HTT(gRNA11148)_spCas9.fq.gz
CNP0001979	CNS0388142	CNX0396754	CNR0478343	LibB(gRNA11149)_spCas9.fq.gz	LibB_HTT(gRNA11149)_spCas9.fq.gz
CNP0001979	CNS0388143	CNX0396755	CNR0478344	LibB(gRNA11150)_spCas9.fq.gz	LibB_HTT(gRNA11150)_spCas9.fq.gz
CNP0001979	CNS0388144	CNX0396756	CNR0478345	LibB(gRNA11151)_spCas9.fq.gz	LibB_HTT(gRNA11151)_spCas9.fq.gz
CNP0001979	CNS0388145	CNX0396757	CNR0478346	LibB(gRNA11152)_spCas9.fq.gz	LibB_HTT(gRNA11152)_spCas9.fq.gz
CNP0001979	CNS0388146	CNX0396758	CNR0478347	LibB(gRNA11153)_spCas9.fq.gz	LibB_HTT(gRNA11153)_spCas9.fq.gz
CNP0001979	CNS0388147	CNX0396759	CNR0478348	LibB(gRNA11154)_spCas9.fq.gz	LibB_HTT(gRNA11154)_spCas9.fq.gz
CNP0001979	CNS0388148	CNX0396760	CNR0478349	LibB(gRNA11155)_spCas9.fq.gz	LibB_HTT(gRNA11155)_spCas9.fq.gz
CNP0001979	CNS0388149	CNX0396761	CNR0478350	LibB(gRNA11190)_spCas9.fq.gz	LibB_IL2RG(gRNA11190)_spCas9.fq.gz
CNP0001979	CNS0388150	CNX0396762	CNR0478351	LibB(gRNA11193)_spCas9.fq.gz	LibB_KLF1(gRNA11193)_spCas9.fq.gz
CNP0001979	CNS0388151	CNX0396763	CNR0478352	LibB(gRNA11194)_spCas9.fq.gz	LibB_KLF1(gRNA11194)_spCas9.fq.gz
CNP0001979	CNS0388152	CNX0396764	CNR0478353	LibB(gRNA11256)_spCas9.fq.gz	LibB_KRT20(gRNA11256)_spCas9.fq.gz
CNP0001979	CNS0388153	CNX0396765	CNR0478354	LibB(gRNA11257)_spCas9.fq.gz	LibB_KRT20(gRNA11257)_spCas9.fq.gz
CNP0001979	CNS0388154	CNX0396766	CNR0478355	LibB(gRNA11254)_spCas9.fq.gz	LibB_LGR5(gRNA11254)_spCas9.fq.gz
CNP0001979	CNS0388155	CNX0396767	CNR0478356	LibB(gRNA11255)_spCas9.fq.gz	LibB_LGR5(gRNA11255)_spCas9.fq.gz
CNP0001979	CNS0388156	CNX0396768	CNR0478357	LibB(gRNA11235)_spCas9.fq.gz	LibB_LUCAT1(gRNA11235)_spCas9.fq.gz
CNP0001979	CNS0388157	CNX0396769	CNR0478358	LibB(gRNA11236)_spCas9.fq.gz	LibB_PDCD1(gRNA11236)_spCas9.fq.gz
CNP0001979	CNS0388158	CNX0396770	CNR0478359	LibB(gRNA11242)_spCas9.fq.gz	LibB_PDCD1(gRNA11242)_spCas9.fq.gz
CNP0001979	CNS0388159	CNX0396771	CNR0478360	LibB(gRNA11243)_spCas9.fq.gz	LibB_PDCD1(gRNA11243)_spCas9.fq.gz
CNP0001979	CNS0388160	CNX0396772	CNR0478361	LibB(gRNA11250)_spCas9.fq.gz	LibB_PDCD1(gRNA11250)_spCas9.fq.gz
CNP0001979	CNS0388161	CNX0396773	CNR0478362	LibB(gRNA11251)_spCas9.fq.gz	LibB_PDCD1(gRNA11251)_spCas9.fq.gz
CNP0001979	CNS0388162	CNX0396774	CNR0478363	LibB(gRNA11252)_spCas9.fq.gz	LibB_PDCD1(gRNA11252)_spCas9.fq.gz
CNP0001979	CNS0388163	CNX0396775	CNR0478364	LibB(gRNA11253)_spCas9.fq.gz	LibB_PDCD1(gRNA11253)_spCas9.fq.gz
CNP0001979	CNS0388164	CNX0396776	CNR0478365	LibB(gRNA11248)_spCas9.fq.gz	LibB_PROM1(gRNA11248)_spCas9.fq.gz
CNP0001979	CNS0388165	CNX0396777	CNR0478366	LibB(gRNA11258)_spCas9.fq.gz	LibB_SHCBP1(gRNA11258)_spCas9.fq.gz
CNP0001979	CNS0388166	CNX0396778	CNR0478367	LibB(gRNA11245)_spCas9.fq.gz	LibB_TNFRSF10A(gRNA11245)_spCas9.fq.gz
CNP0001979	CNS0388167	CNX0396779	CNR0478368	LibB(gRNA11246)_spCas9.fq.gz	LibB_TNFRSF10B(gRNA11246)_spCas9.fq.gz
CNP0001979	CNS0388168	CNX0396780	CNR0478369	LibB(gRNA11247)_spCas9.fq.gz	LibB_TNFRSF10B(gRNA11247)_spCas9.fq.gz
CNP0001979	CNS0388169	CNX0396781	CNR0478370	LibB(gRNA11237)_spCas9.fq.gz	LibB_TRAC(gRNA11237)_spCas9.fq.gz
CNP0001979	CNS0388170	CNX0396782	CNR0478371	LibB(gRNA11238)_spCas9.fq.gz	LibB_TRAC(gRNA11238)_spCas9.fq.gz
CNP0001979	CNS0388171	CNX0396783	CNR0478372	LibB(gRNA11239)_spCas9.fq.gz	LibB_TRBC2(gRNA11239)_spCas9.fq.gz
CNP0001979	CNS0388172	CNX0396784	CNR0478373	LibB(gRNA11240)_spCas9.fq.gz	LibB_TRBC2(gRNA11240)_spCas9.fq.gz
CNP0001979	CNS0388184	CNX0396796	CNR0478385	LibB(gRNA11241)_MOCK.fq.gz	LibB_B2M(gRNA11241)_MOCK.fq.gz
CNP0001979	CNS0388185	CNX0396797	CNR0478386	LibB(gRNA11182)_MOCK.fq.gz	LibB_BCL11A(gRNA11182)_MOCK.fq.gz
CNP0001979	CNS0388186	CNX0396798	CNR0478387	LibB(gRNA11183)_MOCK.fq.gz	LibB_BCL11A(gRNA11183)_MOCK.fq.gz
CNP0001979	CNS0388187	CNX0396799	CNR0478388	LibB(gRNA11184)_MOCK.fq.gz	LibB_BCL11A(gRNA11184)_MOCK.fq.gz
CNP0001979	CNS0388188	CNX0396800	CNR0478389	LibB(gRNA11185)_MOCK.fq.gz	LibB_BCL11A(gRNA11185)_MOCK.fq.gz
CNP0001979	CNS0388189	CNX0396801	CNR0478390	LibB(gRNA11186)_MOCK.fq.gz	LibB_BCL11A(gRNA11186)_MOCK.fq.gz
CNP0001979	CNS0388190	CNX0396802	CNR0478391	LibB(gRNA11187)_MOCK.fq.gz	LibB_BCL11A(gRNA11187)_MOCK.fq.gz
CNP0001979	CNS0388191	CNX0396803	CNR0478392	LibB(gRNA11188)_MOCK.fq.gz	LibB_BCL11A(gRNA11188)_MOCK.fq.gz
CNP0001979	CNS0388192	CNX0396804	CNR0478393	LibB(gRNA11156)_MOCK.fq.gz	LibB_CCR5(gRNA11156)_MOCK.fq.gz
CNP0001979	CNS0388193	CNX0396805	CNR0478394	LibB(gRNA11157)_MOCK.fq.gz	LibB_CCR5(gRNA11157)_MOCK.fq.gz
CNP0001979	CNS0388194	CNX0396806	CNR0478395	LibB(gRNA11161)_MOCK.fq.gz	LibB_CCR5(gRNA11161)_MOCK.fq.gz
CNP0001979	CNS0388195	CNX0396807	CNR0478396	LibB(gRNA11162)_MOCK.fq.gz	LibB_CCR5(gRNA11162)_MOCK.fq.gz
CNP0001979	CNS0388196	CNX0396808	CNR0478397	LibB(gRNA11163)_MOCK.fq.gz	LibB_CCR5(gRNA11163)_MOCK.fq.gz
CNP0001979	CNS0388197	CNX0396809	CNR0478398	LibB(gRNA11164)_MOCK.fq.gz	LibB_CCR5(gRNA11164)_MOCK.fq.gz
CNP0001979	CNS0388198	CNX0396810	CNR0478399	LibB(gRNA11165)_MOCK.fq.gz	LibB_CCR5(gRNA11165)_MOCK.fq.gz
CNP0001979	CNS0388199	CNX0396811	CNR0478400	LibB(gRNA11166)_MOCK.fq.gz	LibB_CCR5(gRNA11166)_MOCK.fq.gz
CNP0001979	CNS0388200	CNX0396812	CNR0478401	LibB(gRNA11167)_MOCK.fq.gz	LibB_CCR5(gRNA11167)_MOCK.fq.gz
CNP0001979	CNS0388201	CNX0396813	CNR0478402	LibB(gRNA11168)_MOCK.fq.gz	LibB_CCR5(gRNA11168)_MOCK.fq.gz
CNP0001979	CNS0388202	CNX0396814	CNR0478403	LibB(gRNA11169)_MOCK.fq.gz	LibB_CCR5(gRNA11169)_MOCK.fq.gz
CNP0001979	CNS0388203	CNX0396815	CNR0478404	LibB(gRNA11170)_MOCK.fq.gz	LibB_CCR5(gRNA11170)_MOCK.fq.gz
CNP0001979	CNS0388204	CNX0396816	CNR0478405	LibB(gRNA11171)_MOCK.fq.gz	LibB_CCR5(gRNA11171)_MOCK.fq.gz
CNP0001979	CNS0388205	CNX0396817	CNR0478406	LibB(gRNA11173)_MOCK.fq.gz	LibB_CCR5(gRNA11173)_MOCK.fq.gz
CNP0001979	CNS0388206	CNX0396818	CNR0478407	LibB(gRNA11174)_MOCK.fq.gz	LibB_CCR5(gRNA11174)_MOCK.fq.gz
CNP0001979	CNS0388207	CNX0396819	CNR0478408	LibB(gRNA11175)_MOCK.fq.gz	LibB_CCR5(gRNA11175)_MOCK.fq.gz
CNP0001979	CNS0388208	CNX0396820	CNR0478409	LibB(gRNA11145)_MOCK.fq.gz	LibB_CEP290(gRNA11145)_MOCK.fq.gz
CNP0001979	CNS0388209	CNX0396821	CNR0478410	LibB(gRNA11158)_MOCK.fq.gz	LibB_CXCR4(gRNA11158)_MOCK.fq.gz
CNP0001979	CNS0388210	CNX0396822	CNR0478411	LibB(gRNA11159)_MOCK.fq.gz	LibB_CXCR4(gRNA11159)_MOCK.fq.gz
CNP0001979	CNS0388211	CNX0396823	CNR0478412	LibB(gRNA11160)_MOCK.fq.gz	LibB_CXCR4(gRNA11160)_MOCK.fq.gz
CNP0001979	CNS0388212	CNX0396824	CNR0478413	LibB(gRNA11172)_MOCK.fq.gz	LibB_CXCR4(gRNA11172)_MOCK.fq.gz
CNP0001979	CNS0388213	CNX0396825	CNR0478414	LibB(gRNA11195)_MOCK.fq.gz	LibB_DMD(gRNA11195)_MOCK.fq.gz
CNP0001979	CNS0388214	CNX0396826	CNR0478415	LibB(gRNA11196)_MOCK.fq.gz	LibB_DMD(gRNA11196)_MOCK.fq.gz
CNP0001979	CNS0388215	CNX0396827	CNR0478416	LibB(gRNA11197)_MOCK.fq.gz	LibB_DMD(gRNA11197)_MOCK.fq.gz
CNP0001979	CNS0388216	CNX0396828	CNR0478417	LibB(gRNA11198)_MOCK.fq.gz	LibB_DMD(gRNA11198)_MOCK.fq.gz
CNP0001979	CNS0388217	CNX0396829	CNR0478418	LibB(gRNA11199)_MOCK.fq.gz	LibB_DMD(gRNA11199)_MOCK.fq.gz
CNP0001979	CNS0388218	CNX0396830	CNR0478419	LibB(gRNA11200)_MOCK.fq.gz	LibB_DMD(gRNA11200)_MOCK.fq.gz
CNP0001979	CNS0388219	CNX0396831	CNR0478420	LibB(gRNA11201)_MOCK.fq.gz	LibB_DMD(gRNA11201)_MOCK.fq.gz
CNP0001979	CNS0388220	CNX0396832	CNR0478421	LibB(gRNA11202)_MOCK.fq.gz	LibB_DMD(gRNA11202)_MOCK.fq.gz
CNP0001979	CNS0388221	CNX0396833	CNR0478422	LibB(gRNA11203)_MOCK.fq.gz	LibB_DMD(gRNA11203)_MOCK.fq.gz
CNP0001979	CNS0388222	CNX0396834	CNR0478423	LibB(gRNA11204)_MOCK.fq.gz	LibB_DMD(gRNA11204)_MOCK.fq.gz
CNP0001979	CNS0388223	CNX0396835	CNR0478424	LibB(gRNA11205)_MOCK.fq.gz	LibB_DMD(gRNA11205)_MOCK.fq.gz
CNP0001979	CNS0388224	CNX0396836	CNR0478425	LibB(gRNA11206)_MOCK.fq.gz	LibB_DMD(gRNA11206)_MOCK.fq.gz
CNP0001979	CNS0388225	CNX0396837	CNR0478426	LibB(gRNA11207)_MOCK.fq.gz	LibB_DMD(gRNA11207)_MOCK.fq.gz
CNP0001979	CNS0388226	CNX0396838	CNR0478427	LibB(gRNA11208)_MOCK.fq.gz	LibB_DMD(gRNA11208)_MOCK.fq.gz
CNP0001979	CNS0388227	CNX0396839	CNR0478428	LibB(gRNA11209)_MOCK.fq.gz	LibB_DMD(gRNA11209)_MOCK.fq.gz
CNP0001979	CNS0388228	CNX0396840	CNR0478429	LibB(gRNA11210)_MOCK.fq.gz	LibB_DMD(gRNA11210)_MOCK.fq.gz
CNP0001979	CNS0388229	CNX0396841	CNR0478430	LibB(gRNA11211)_MOCK.fq.gz	LibB_DMD(gRNA11211)_MOCK.fq.gz
CNP0001979	CNS0388230	CNX0396842	CNR0478431	LibB(gRNA11212)_MOCK.fq.gz	LibB_DMD(gRNA11212)_MOCK.fq.gz
CNP0001979	CNS0388231	CNX0396843	CNR0478432	LibB(gRNA11213)_MOCK.fq.gz	LibB_DMD(gRNA11213)_MOCK.fq.gz
CNP0001979	CNS0388232	CNX0396844	CNR0478433	LibB(gRNA11214)_MOCK.fq.gz	LibB_DMD(gRNA11214)_MOCK.fq.gz
CNP0001979	CNS0388233	CNX0396845	CNR0478434	LibB(gRNA11215)_MOCK.fq.gz	LibB_DMD(gRNA11215)_MOCK.fq.gz
CNP0001979	CNS0388234	CNX0396846	CNR0478435	LibB(gRNA11216)_MOCK.fq.gz	LibB_DMD(gRNA11216)_MOCK.fq.gz
CNP0001979	CNS0388235	CNX0396847	CNR0478436	LibB(gRNA11217)_MOCK.fq.gz	LibB_DMD(gRNA11217)_MOCK.fq.gz
CNP0001979	CNS0388236	CNX0396848	CNR0478437	LibB(gRNA11218)_MOCK.fq.gz	LibB_DMD(gRNA11218)_MOCK.fq.gz
CNP0001979	CNS0388237	CNX0396849	CNR0478438	LibB(gRNA11219)_MOCK.fq.gz	LibB_DMD(gRNA11219)_MOCK.fq.gz
CNP0001979	CNS0388238	CNX0396850	CNR0478439	LibB(gRNA11220)_MOCK.fq.gz	LibB_DMD(gRNA11220)_MOCK.fq.gz
CNP0001979	CNS0388239	CNX0396851	CNR0478440	LibB(gRNA11221)_MOCK.fq.gz	LibB_DMD(gRNA11221)_MOCK.fq.gz
CNP0001979	CNS0388240	CNX0396852	CNR0478441	LibB(gRNA11222)_MOCK.fq.gz	LibB_DMD(gRNA11222)_MOCK.fq.gz
CNP0001979	CNS0388241	CNX0396853	CNR0478442	LibB(gRNA11223)_MOCK.fq.gz	LibB_DMD(gRNA11223)_MOCK.fq.gz
CNP0001979	CNS0388242	CNX0396854	CNR0478443	LibB(gRNA11224)_MOCK.fq.gz	LibB_DMD(gRNA11224)_MOCK.fq.gz
CNP0001979	CNS0388243	CNX0396855	CNR0478444	LibB(gRNA11225)_MOCK.fq.gz	LibB_DMD(gRNA11225)_MOCK.fq.gz
CNP0001979	CNS0388244	CNX0396856	CNR0478445	LibB(gRNA11226)_MOCK.fq.gz	LibB_DMD(gRNA11226)_MOCK.fq.gz
CNP0001979	CNS0388245	CNX0396857	CNR0478446	LibB(gRNA11227)_MOCK.fq.gz	LibB_DMD(gRNA11227)_MOCK.fq.gz
CNP0001979	CNS0388246	CNX0396858	CNR0478447	LibB(gRNA11228)_MOCK.fq.gz	LibB_DMD(gRNA11228)_MOCK.fq.gz
CNP0001979	CNS0388247	CNX0396859	CNR0478448	LibB(gRNA11229)_MOCK.fq.gz	LibB_DMD(gRNA11229)_MOCK.fq.gz
CNP0001979	CNS0388248	CNX0396860	CNR0478449	LibB(gRNA11230)_MOCK.fq.gz	LibB_DMD(gRNA11230)_MOCK.fq.gz
CNP0001979	CNS0388249	CNX0396861	CNR0478450	LibB(gRNA11231)_MOCK.fq.gz	LibB_DMD(gRNA11231)_MOCK.fq.gz
CNP0001979	CNS0388250	CNX0396862	CNR0478451	LibB(gRNA11232)_MOCK.fq.gz	LibB_DMD(gRNA11232)_MOCK.fq.gz
CNP0001979	CNS0388251	CNX0396863	CNR0478452	LibB(gRNA11233)_MOCK.fq.gz	LibB_DMD(gRNA11233)_MOCK.fq.gz
CNP0001979	CNS0388252	CNX0396864	CNR0478453	LibB(gRNA11234)_MOCK.fq.gz	LibB_DMD(gRNA11234)_MOCK.fq.gz
CNP0001979	CNS0388253	CNX0396865	CNR0478454	LibB(gRNA11244)_MOCK.fq.gz	LibB_FAS(gRNA11244)_MOCK.fq.gz
CNP0001979	CNS0388254	CNX0396866	CNR0478455	LibB(gRNA11176)_MOCK.fq.gz	LibB_HBB(gRNA11176)_MOCK.fq.gz
CNP0001979	CNS0388255	CNX0396867	CNR0478456	LibB(gRNA11177)_MOCK.fq.gz	LibB_HBB(gRNA11177)_MOCK.fq.gz
CNP0001979	CNS0388256	CNX0396868	CNR0478457	LibB(gRNA11178)_MOCK.fq.gz	LibB_HBB(gRNA11178)_MOCK.fq.gz
CNP0001979	CNS0388257	CNX0396869	CNR0478458	LibB(gRNA11179)_MOCK.fq.gz	LibB_HBB(gRNA11179)_MOCK.fq.gz
CNP0001979	CNS0388258	CNX0396870	CNR0478459	LibB(gRNA11181)_MOCK.fq.gz	LibB_HBB(gRNA11181)_MOCK.fq.gz
CNP0001979	CNS0388259	CNX0396871	CNR0478460	LibB(gRNA11189)_MOCK.fq.gz	LibB_HBB(gRNA11189)_MOCK.fq.gz
CNP0001979	CNS0388260	CNX0396872	CNR0478461	LibB(gRNA11192)_MOCK.fq.gz	LibB_HBB(gRNA11192)_MOCK.fq.gz
CNP0001979	CNS0388261	CNX0396873	CNR0478462	LibB(gRNA11146)_MOCK.fq.gz	LibB_HTT(gRNA11146)_MOCK.fq.gz
CNP0001979	CNS0388262	CNX0396874	CNR0478463	LibB(gRNA11147)_MOCK.fq.gz	LibB_HTT(gRNA11147)_MOCK.fq.gz
CNP0001979	CNS0388263	CNX0396875	CNR0478464	LibB(gRNA11148)_MOCK.fq.gz	LibB_HTT(gRNA11148)_MOCK.fq.gz
CNP0001979	CNS0388264	CNX0396876	CNR0478465	LibB(gRNA11149)_MOCK.fq.gz	LibB_HTT(gRNA11149)_MOCK.fq.gz
CNP0001979	CNS0388265	CNX0396877	CNR0478466	LibB(gRNA11150)_MOCK.fq.gz	LibB_HTT(gRNA11150)_MOCK.fq.gz
CNP0001979	CNS0388266	CNX0396878	CNR0478467	LibB(gRNA11151)_MOCK.fq.gz	LibB_HTT(gRNA11151)_MOCK.fq.gz
CNP0001979	CNS0388267	CNX0396879	CNR0478468	LibB(gRNA11152)_MOCK.fq.gz	LibB_HTT(gRNA11152)_MOCK.fq.gz
CNP0001979	CNS0388268	CNX0396880	CNR0478469	LibB(gRNA11153)_MOCK.fq.gz	LibB_HTT(gRNA11153)_MOCK.fq.gz
CNP0001979	CNS0388269	CNX0396881	CNR0478470	LibB(gRNA11154)_MOCK.fq.gz	LibB_HTT(gRNA11154)_MOCK.fq.gz
CNP0001979	CNS0388270	CNX0396882	CNR0478471	LibB(gRNA11155)_MOCK.fq.gz	LibB_HTT(gRNA11155)_MOCK.fq.gz
CNP0001979	CNS0388271	CNX0396883	CNR0478472	LibB(gRNA11190)_MOCK.fq.gz	LibB_IL2RG(gRNA11190)_MOCK.fq.gz
CNP0001979	CNS0388272	CNX0396884	CNR0478473	LibB(gRNA11193)_MOCK.fq.gz	LibB_KLF1(gRNA11193)_MOCK.fq.gz
CNP0001979	CNS0388273	CNX0396885	CNR0478474	LibB(gRNA11194)_MOCK.fq.gz	LibB_KLF1(gRNA11194)_MOCK.fq.gz
CNP0001979	CNS0388274	CNX0396886	CNR0478475	LibB(gRNA11256)_MOCK.fq.gz	LibB_KRT20(gRNA11256)_MOCK.fq.gz
CNP0001979	CNS0388275	CNX0396887	CNR0478476	LibB(gRNA11257)_MOCK.fq.gz	LibB_KRT20(gRNA11257)_MOCK.fq.gz
CNP0001979	CNS0388276	CNX0396888	CNR0478477	LibB(gRNA11254)_MOCK.fq.gz	LibB_LGR5(gRNA11254)_MOCK.fq.gz
CNP0001979	CNS0388277	CNX0396889	CNR0478478	LibB(gRNA11255)_MOCK.fq.gz	LibB_LGR5(gRNA11255)_MOCK.fq.gz
CNP0001979	CNS0388278	CNX0396890	CNR0478479	LibB(gRNA11235)_MOCK.fq.gz	LibB_LUCAT1(gRNA11235)_MOCK.fq.gz
CNP0001979	CNS0388279	CNX0396891	CNR0478480	LibB(gRNA11236)_MOCK.fq.gz	LibB_PDCD1(gRNA11236)_MOCK.fq.gz
CNP0001979	CNS0388280	CNX0396892	CNR0478481	LibB(gRNA11242)_MOCK.fq.gz	LibB_PDCD1(gRNA11242)_MOCK.fq.gz
CNP0001979	CNS0388281	CNX0396893	CNR0478482	LibB(gRNA11243)_MOCK.fq.gz	LibB_PDCD1(gRNA11243)_MOCK.fq.gz
CNP0001979	CNS0388282	CNX0396894	CNR0478483	LibB(gRNA11250)_MOCK.fq.gz	LibB_PDCD1(gRNA11250)_MOCK.fq.gz
CNP0001979	CNS0388283	CNX0396895	CNR0478484	LibB(gRNA11251)_MOCK.fq.gz	LibB_PDCD1(gRNA11251)_MOCK.fq.gz
CNP0001979	CNS0388284	CNX0396896	CNR0478485	LibB(gRNA11252)_MOCK.fq.gz	LibB_PDCD1(gRNA11252)_MOCK.fq.gz
CNP0001979	CNS0388285	CNX0396897	CNR0478486	LibB(gRNA11253)_MOCK.fq.gz	LibB_PDCD1(gRNA11253)_MOCK.fq.gz
CNP0001979	CNS0388286	CNX0396898	CNR0478487	LibB(gRNA11248)_MOCK.fq.gz	LibB_PROM1(gRNA11248)_MOCK.fq.gz
CNP0001979	CNS0388287	CNX0396899	CNR0478488	LibB(gRNA11258)_MOCK.fq.gz	LibB_SHCBP1(gRNA11258)_MOCK.fq.gz
CNP0001979	CNS0388288	CNX0396900	CNR0478489	LibB(gRNA11245)_MOCK.fq.gz	LibB_TNFRSF10A(gRNA11245)_MOCK.fq.gz
CNP0001979	CNS0388289	CNX0396901	CNR0478490	LibB(gRNA11246)_MOCK.fq.gz	LibB_TNFRSF10B(gRNA11246)_MOCK.fq.gz
CNP0001979	CNS0388290	CNX0396902	CNR0478491	LibB(gRNA11247)_MOCK.fq.gz	LibB_TNFRSF10B(gRNA11247)_MOCK.fq.gz
CNP0001979	CNS0388291	CNX0396903	CNR0478492	LibB(gRNA11237)_MOCK.fq.gz	LibB_TRAC(gRNA11237)_MOCK.fq.gz
CNP0001979	CNS0388292	CNX0396904	CNR0478493	LibB(gRNA11238)_MOCK.fq.gz	LibB_TRAC(gRNA11238)_MOCK.fq.gz
CNP0001979	CNS0388293	CNX0396905	CNR0478494	LibB(gRNA11239)_MOCK.fq.gz	LibB_TRBC2(gRNA11239)_MOCK.fq.gz
CNP0001979	CNS0388294	CNX0396906	CNR0478495	LibB(gRNA11240)_MOCK.fq.gz	LibB_TRBC2(gRNA11240)_MOCK.fq.gz
CNP0002595	CNS0499742	CNX0406307	CNR0489035	LibC(gRNA10573)_MOCK.fastq.gz	LibC_MM1(gRNA10573)_MOCK.fastq.gz
CNP0002595	CNS0499743	CNX0406308	CNR0489036	LibC(gRNA10583)_MOCK.fastq.gz	LibC_MM1(gRNA10583)_MOCK.fastq.gz
CNP0002595	CNS0499744	CNX0406309	CNR0489037	LibC(gRNA10593)_MOCK.fastq.gz	LibC_MM1(gRNA10593)_MOCK.fastq.gz
CNP0002595	CNS0499745	CNX0406310	CNR0489038	LibC(gRNA10603)_MOCK.fastq.gz	LibC_MM1(gRNA10603)_MOCK.fastq.gz
CNP0002595	CNS0499746	CNX0406311	CNR0489039	LibC(gRNA10613)_MOCK.fastq.gz	LibC_MM1(gRNA10613)_MOCK.fastq.gz
CNP0002595	CNS0499747	CNX0406312	CNR0489040	LibC(gRNA10573)_spCas9.fastq.gz	LibC_MM1(gRNA10573)_spCas9.fastq.gz
CNP0002595	CNS0499748	CNX0406313	CNR0489041	LibC(gRNA10583)_spCas9.fastq.gz	LibC_MM1(gRNA10583)_spCas9.fastq.gz
CNP0002595	CNS0499749	CNX0406314	CNR0489042	LibC(gRNA10593)_spCas9.fastq.gz	LibC_MM1(gRNA10593)_spCas9.fastq.gz
CNP0002595	CNS0499750	CNX0406315	CNR0489043	LibC(gRNA10603)_spCas9.fastq.gz	LibC_MM1(gRNA10603)_spCas9.fastq.gz
CNP0002595	CNS0499751	CNX0406316	CNR0489044	LibC(gRNA10613)_spCas9.fastq.gz	LibC_MM1(gRNA10613)_spCas9.fastq.gz
CNP0002648	CNS0513003	CNX0411651	CNR0495154	HEK293T_HiFispCas9_4708	HEK293T_HiFispCas9_4708.fastq.gz
CNP0002648	CNS0513004	CNX0411652	CNR0495155	HEK293T_HiFispCas9_4729	HEK293T_HiFispCas9_4729.fastq.gz
CNP0002648	CNS0513005	CNX0411653	CNR0495156	HEK293T_HiFispCas9_5029	HEK293T_HiFispCas9_5029.fastq.gz
CNP0002648	CNS0513006	CNX0411654	CNR0495157	HEK293T_HiFispCas9_5032	HEK293T_HiFispCas9_5032.fastq.gz
CNP0002648	CNS0513007	CNX0411655	CNR0495158	HEK293T_HiFispCas9_5035	HEK293T_HiFispCas9_5035.fastq.gz
CNP0002648	CNS0513008	CNX0411656	CNR0495159	HEK293T_HiFispCas9_5595	HEK293T_HiFispCas9_5595.fastq.gz
CNP0002648	CNS0513009	CNX0411657	CNR0495160	HEK293T_HiFispCas9_5600	HEK293T_HiFispCas9_5600.fastq.gz
CNP0002648	CNS0513010	CNX0411658	CNR0495161	HEK293T_HiFispCas9_5675	HEK293T_HiFispCas9_5675.fastq.gz
CNP0002648	CNS0513011	CNX0411659	CNR0495162	HEK293T_HiFispCas9_5679	HEK293T_HiFispCas9_5679.fastq.gz
CNP0002648	CNS0513012	CNX0411660	CNR0495163	HEK293T_HiFispCas9_6791	HEK293T_HiFispCas9_6791.fastq.gz
CNP0002648	CNS0513013	CNX0411661	CNR0495164	HEK293T_HiFispCas9_6832	HEK293T_HiFispCas9_6832.fastq.gz
CNP0002648	CNS0513014	CNX0411662	CNR0495165	HEK293T_HiFispCas9_6873	HEK293T_HiFispCas9_6873.fastq.gz
CNP0002648	CNS0513015	CNX0411663	CNR0495166	HEK293T_HiFispCas9_9490	HEK293T_HiFispCas9_9490.fastq.gz
CNP0002648	CNS0513016	CNX0411664	CNR0495167	HEK293T_HiFispCas9_9506	HEK293T_HiFispCas9_9506.fastq.gz
CNP0002648	CNS0513017	CNX0411665	CNR0495168	HEK293T_HiFispCas9_11290	HEK293T_HiFispCas9_11290.fastq.gz
CNP0002648	CNS0513018	CNX0411666	CNR0495169	HEK293T_HiFispCas9_11291	HEK293T_HiFispCas9_11291.fastq.gz
CNP0002648	CNS0513019	CNX0411667	CNR0495170	HEK293T_HiFispCas9_11296	HEK293T_HiFispCas9_11296.fastq.gz
CNP0002648	CNS0513020	CNX0411668	CNR0495171	HEK293T_HiFispCas9_11397	HEK293T_HiFispCas9_11397.fastq.gz
CNP0002648	CNS0513021	CNX0411669	CNR0495172	HEK293T_HiFispCas9_11398	HEK293T_HiFispCas9_11398.fastq.gz
CNP0002648	CNS0513022	CNX0411670	CNR0495173	HEK293T_HiFispCas9_11414	HEK293T_HiFispCas9_11414.fastq.gz
CNP0002648	CNS0513023	CNX0411671	CNR0495174	HEK293T_HiFispCas9_11437	HEK293T_HiFispCas9_11437.fastq.gz
CNP0002648	CNS0513024	CNX0411672	CNR0495175	HEK293T_HiFispCas9_11458	HEK293T_HiFispCas9_11458.fastq.gz
CNP0002648	CNS0513025	CNX0411673	CNR0495176	HEK293T_HiFispCas9_11510	HEK293T_HiFispCas9_11510.fastq.gz
CNP0002648	CNS0513026	CNX0411674	CNR0495177	HEK293T_HiFispCas9_HEK293TT4	HEK293T_HiFispCas9_HEK293TT4.fastq.gz
CNP0002648	CNS0513027	CNX0411675	CNR0495178	HEK293T_HiFispCas9_RGN11179	HEK293T_HiFispCas9_RGN11179.fastq.gz
CNP0002648	CNS0513028	CNX0411676	CNR0495179	HEK293T_HiFispCas9_RGN11184	HEK293T_HiFispCas9_RGN11184.fastq.gz
CNP0002648	CNS0513029	CNX0411677	CNR0495180	HEK293T_HiFispCas9_RGN11189	HEK293T_HiFispCas9_RGN11189.fastq.gz
CNP0002648	CNS0513030	CNX0411678	CNR0495181	HEK293T_HiFispCas9_RGN11208	HEK293T_HiFispCas9_RGN11208.fastq.gz
CNP0002648	CNS0513031	CNX0411679	CNR0495182	HEK293T_HiFispCas9_RGN11237	HEK293T_HiFispCas9_RGN11237.fastq.gz
CNP0002648	CNS0513032	CNX0411680	CNR0495183	HEK293T_HiFispCas9_VEGFAT2	HEK293T_HiFispCas9_VEGFAT2.fastq.gz
CNP0002648	CNS0513033	CNX0411681	CNR0495184	HEK293T_MOCK_4708	HEK293T_MOCK_4708.fastq.gz
CNP0002648	CNS0513034	CNX0411682	CNR0495185	HEK293T_MOCK_4729	HEK293T_MOCK_4729.fastq.gz
CNP0002648	CNS0513035	CNX0411683	CNR0495186	HEK293T_MOCK_5029	HEK293T_MOCK_5029.fastq.gz
CNP0002648	CNS0513036	CNX0411684	CNR0495187	HEK293T_MOCK_5032	HEK293T_MOCK_5032.fastq.gz
CNP0002648	CNS0513037	CNX0411685	CNR0495188	HEK293T_MOCK_5035	HEK293T_MOCK_5035.fastq.gz
CNP0002648	CNS0513038	CNX0411686	CNR0495189	HEK293T_MOCK_5595	HEK293T_MOCK_5595.fastq.gz
CNP0002648	CNS0513039	CNX0411687	CNR0495190	HEK293T_MOCK_5600	HEK293T_MOCK_5600.fastq.gz
CNP0002648	CNS0513040	CNX0411688	CNR0495191	HEK293T_MOCK_5675	HEK293T_MOCK_5675.fastq.gz
CNP0002648	CNS0513041	CNX0411689	CNR0495192	HEK293T_MOCK_5679	HEK293T_MOCK_5679.fastq.gz
CNP0002648	CNS0513042	CNX0411690	CNR0495193	HEK293T_MOCK_6791	HEK293T_MOCK_6791.fastq.gz
CNP0002648	CNS0513043	CNX0411691	CNR0495194	HEK293T_MOCK_6832	HEK293T_MOCK_6832.fastq.gz
CNP0002648	CNS0513044	CNX0411692	CNR0495195	HEK293T_MOCK_6873	HEK293T_MOCK_6873.fastq.gz
CNP0002648	CNS0513045	CNX0411693	CNR0495196	HEK293T_MOCK_9490	HEK293T_MOCK_9490.fastq.gz
CNP0002648	CNS0513046	CNX0411694	CNR0495197	HEK293T_MOCK_9506	HEK293T_MOCK_9506.fastq.gz
CNP0002648	CNS0513047	CNX0411695	CNR0495198	HEK293T_MOCK_11290	HEK293T_MOCK_11290.fastq.gz
CNP0002648	CNS0513048	CNX0411696	CNR0495199	HEK293T_MOCK_11291	HEK293T_MOCK_11291.fastq.gz
CNP0002648	CNS0513049	CNX0411697	CNR0495200	HEK293T_MOCK_11296	HEK293T_MOCK_11296.fastq.gz
CNP0002648	CNS0513050	CNX0411698	CNR0495201	HEK293T_MOCK_11397	HEK293T_MOCK_11397.fastq.gz
CNP0002648	CNS0513051	CNX0411699	CNR0495202	HEK293T_MOCK_11398	HEK293T_MOCK_11398.fastq.gz
CNP0002648	CNS0513052	CNX0411700	CNR0495203	HEK293T_MOCK_11414	HEK293T_MOCK_11414.fastq.gz
CNP0002648	CNS0513053	CNX0411701	CNR0495204	HEK293T_MOCK_11437	HEK293T_MOCK_11437.fastq.gz
CNP0002648	CNS0513054	CNX0411702	CNR0495205	HEK293T_MOCK_11458	HEK293T_MOCK_11458.fastq.gz
CNP0002648	CNS0513055	CNX0411703	CNR0495206	HEK293T_MOCK_11510	HEK293T_MOCK_11510.fastq.gz
CNP0002648	CNS0513056	CNX0411704	CNR0495207	HEK293T_MOCK_HEK293TT4	HEK293T_MOCK_HEK293TT4.fastq.gz
CNP0002648	CNS0513057	CNX0411705	CNR0495208	HEK293T_MOCK_RGN11179	HEK293T_MOCK_RGN11179.fastq.gz
CNP0002648	CNS0513058	CNX0411706	CNR0495209	HEK293T_MOCK_RGN11184	HEK293T_MOCK_RGN11184.fastq.gz
CNP0002648	CNS0513059	CNX0411707	CNR0495210	HEK293T_MOCK_RGN11189	HEK293T_MOCK_RGN11189.fastq.gz
CNP0002648	CNS0513060	CNX0411708	CNR0495211	HEK293T_MOCK_RGN11208	HEK293T_MOCK_RGN11208.fastq.gz
CNP0002648	CNS0513061	CNX0411709	CNR0495212	HEK293T_MOCK_RGN11237	HEK293T_MOCK_RGN11237.fastq.gz
CNP0002648	CNS0513062	CNX0411710	CNR0495213	HEK293T_MOCK_VEGFAT2	HEK293T_MOCK_VEGFAT2.fastq.gz
CNP0002648	CNS0513063	CNX0411711	CNR0495214	HEK293T_spCas9_4708	HEK293T_spCas9_4708.fastq.gz
CNP0002648	CNS0513064	CNX0411712	CNR0495215	HEK293T_spCas9_4729	HEK293T_spCas9_4729.fastq.gz
CNP0002648	CNS0513065	CNX0411713	CNR0495216	HEK293T_spCas9_5029	HEK293T_spCas9_5029.fastq.gz
CNP0002648	CNS0513066	CNX0411714	CNR0495217	HEK293T_spCas9_5032	HEK293T_spCas9_5032.fastq.gz
CNP0002648	CNS0513067	CNX0411715	CNR0495218	HEK293T_spCas9_5035	HEK293T_spCas9_5035.fastq.gz
CNP0002648	CNS0513068	CNX0411716	CNR0495219	HEK293T_spCas9_5595	HEK293T_spCas9_5595.fastq.gz
CNP0002648	CNS0513069	CNX0411717	CNR0495220	HEK293T_spCas9_5600	HEK293T_spCas9_5600.fastq.gz
CNP0002648	CNS0513070	CNX0411718	CNR0495221	HEK293T_spCas9_5675	HEK293T_spCas9_5675.fastq.gz
CNP0002648	CNS0513071	CNX0411719	CNR0495222	HEK293T_spCas9_5679	HEK293T_spCas9_5679.fastq.gz
CNP0002648	CNS0513072	CNX0411720	CNR0495223	HEK293T_spCas9_6791	HEK293T_spCas9_6791.fastq.gz
CNP0002648	CNS0513073	CNX0411721	CNR0495224	HEK293T_spCas9_6832	HEK293T_spCas9_6832.fastq.gz
CNP0002648	CNS0513074	CNX0411722	CNR0495225	HEK293T_spCas9_6873	HEK293T_spCas9_6873.fastq.gz
CNP0002648	CNS0513075	CNX0411723	CNR0495226	HEK293T_spCas9_9490	HEK293T_spCas9_9490.fastq.gz
CNP0002648	CNS0513076	CNX0411724	CNR0495227	HEK293T_spCas9_9506	HEK293T_spCas9_9506.fastq.gz
CNP0002648	CNS0513077	CNX0411725	CNR0495228	HEK293T_spCas9_11290	HEK293T_spCas9_11290.fastq.gz
CNP0002648	CNS0513078	CNX0411726	CNR0495229	HEK293T_spCas9_11291	HEK293T_spCas9_11291.fastq.gz
CNP0002648	CNS0513079	CNX0411727	CNR0495230	HEK293T_spCas9_11296	HEK293T_spCas9_11296.fastq.gz
CNP0002648	CNS0513080	CNX0411728	CNR0495231	HEK293T_spCas9_11397	HEK293T_spCas9_11397.fastq.gz
CNP0002648	CNS0513081	CNX0411729	CNR0495232	HEK293T_spCas9_11398	HEK293T_spCas9_11398.fastq.gz
CNP0002648	CNS0513082	CNX0411730	CNR0495233	HEK293T_spCas9_11414	HEK293T_spCas9_11414.fastq.gz
CNP0002648	CNS0513083	CNX0411731	CNR0495234	HEK293T_spCas9_11437	HEK293T_spCas9_11437.fastq.gz
CNP0002648	CNS0513084	CNX0411732	CNR0495235	HEK293T_spCas9_11458	HEK293T_spCas9_11458.fastq.gz
CNP0002648	CNS0513085	CNX0411733	CNR0495236	HEK293T_spCas9_11510	HEK293T_spCas9_11510.fastq.gz
CNP0002648	CNS0513086	CNX0411734	CNR0495237	HEK293T_spCas9_HEK293TT4	HEK293T_spCas9_HEK293TT4.fastq.gz
CNP0002648	CNS0513087	CNX0411735	CNR0495238	HEK293T_spCas9_RGN11179	HEK293T_spCas9_RGN11179.fastq.gz
CNP0002648	CNS0513088	CNX0411736	CNR0495239	HEK293T_spCas9_RGN11184	HEK293T_spCas9_RGN11184.fastq.gz
CNP0002648	CNS0513089	CNX0411737	CNR0495240	HEK293T_spCas9_RGN11189	HEK293T_spCas9_RGN11189.fastq.gz
CNP0002648	CNS0513090	CNX0411738	CNR0495241	HEK293T_spCas9_RGN11208	HEK293T_spCas9_RGN11208.fastq.gz
CNP0002648	CNS0513091	CNX0411739	CNR0495242	HEK293T_spCas9_RGN11237	HEK293T_spCas9_RGN11237.fastq.gz
CNP0002648	CNS0513092	CNX0411740	CNR0495243	HEK293T_spCas9_VEGFAT2	HEK293T_spCas9_VEGFAT2.fastq.gz
CNP0002648	CNS0513093	CNX0411741	CNR0495244	KUH132_HiFispCas9_4708	KUH132_HiFispCas9_4708.fastq.gz
CNP0002648	CNS0513094	CNX0411742	CNR0495245	KUH132_HiFispCas9_4729	KUH132_HiFispCas9_4729.fastq.gz
CNP0002648	CNS0513095	CNX0411743	CNR0495246	KUH132_HiFispCas9_5029	KUH132_HiFispCas9_5029.fastq.gz
CNP0002648	CNS0513096	CNX0411744	CNR0495247	KUH132_HiFispCas9_5032	KUH132_HiFispCas9_5032.fastq.gz
CNP0002648	CNS0513097	CNX0411745	CNR0495248	KUH132_HiFispCas9_5035	KUH132_HiFispCas9_5035.fastq.gz
CNP0002648	CNS0513098	CNX0411746	CNR0495249	KUH132_HiFispCas9_5595	KUH132_HiFispCas9_5595.fastq.gz
CNP0002648	CNS0513099	CNX0411747	CNR0495250	KUH132_HiFispCas9_5600	KUH132_HiFispCas9_5600.fastq.gz
CNP0002648	CNS0513100	CNX0411748	CNR0495251	KUH132_HiFispCas9_5675	KUH132_HiFispCas9_5675.fastq.gz
CNP0002648	CNS0513101	CNX0411749	CNR0495252	KUH132_HiFispCas9_5679	KUH132_HiFispCas9_5679.fastq.gz
CNP0002648	CNS0513102	CNX0411750	CNR0495253	KUH132_HiFispCas9_6791	KUH132_HiFispCas9_6791.fastq.gz
CNP0002648	CNS0513103	CNX0411751	CNR0495254	KUH132_HiFispCas9_6832	KUH132_HiFispCas9_6832.fastq.gz
CNP0002648	CNS0513104	CNX0411752	CNR0495255	KUH132_HiFispCas9_6873	KUH132_HiFispCas9_6873.fastq.gz
CNP0002648	CNS0513105	CNX0411753	CNR0495256	KUH132_HiFispCas9_9490	KUH132_HiFispCas9_9490.fastq.gz
CNP0002648	CNS0513106	CNX0411754	CNR0495257	KUH132_HiFispCas9_9506	KUH132_HiFispCas9_9506.fastq.gz
CNP0002648	CNS0513107	CNX0411755	CNR0495258	KUH132_HiFispCas9_11290	KUH132_HiFispCas9_11290.fastq.gz
CNP0002648	CNS0513108	CNX0411756	CNR0495259	KUH132_HiFispCas9_11291	KUH132_HiFispCas9_11291.fastq.gz
CNP0002648	CNS0513109	CNX0411757	CNR0495260	KUH132_HiFispCas9_11296	KUH132_HiFispCas9_11296.fastq.gz
CNP0002648	CNS0513110	CNX0411758	CNR0495261	KUH132_HiFispCas9_11397	KUH132_HiFispCas9_11397.fastq.gz
CNP0002648	CNS0513111	CNX0411759	CNR0495262	KUH132_HiFispCas9_11398	KUH132_HiFispCas9_11398.fastq.gz
CNP0002648	CNS0513112	CNX0411760	CNR0495263	KUH132_HiFispCas9_11414	KUH132_HiFispCas9_11414.fastq.gz
CNP0002648	CNS0513113	CNX0411761	CNR0495264	KUH132_HiFispCas9_11437	KUH132_HiFispCas9_11437.fastq.gz
CNP0002648	CNS0513114	CNX0411762	CNR0495265	KUH132_HiFispCas9_11458	KUH132_HiFispCas9_11458.fastq.gz
CNP0002648	CNS0513115	CNX0411763	CNR0495266	KUH132_HiFispCas9_11510	KUH132_HiFispCas9_11510.fastq.gz
CNP0002648	CNS0513116	CNX0411764	CNR0495267	KUH132_HiFispCas9_HEK293TT4	KUH132_HiFispCas9_HEK293TT4.fastq.gz
CNP0002648	CNS0513117	CNX0411765	CNR0495268	KUH132_HiFispCas9_RGN11179	KUH132_HiFispCas9_RGN11179.fastq.gz
CNP0002648	CNS0513118	CNX0411766	CNR0495269	KUH132_HiFispCas9_RGN11184	KUH132_HiFispCas9_RGN11184.fastq.gz
CNP0002648	CNS0513119	CNX0411767	CNR0495270	KUH132_HiFispCas9_RGN11189	KUH132_HiFispCas9_RGN11189.fastq.gz
CNP0002648	CNS0513120	CNX0411768	CNR0495271	KUH132_HiFispCas9_RGN11208	KUH132_HiFispCas9_RGN11208.fastq.gz
CNP0002648	CNS0513121	CNX0411769	CNR0495272	KUH132_HiFispCas9_RGN11237	KUH132_HiFispCas9_RGN11237.fastq.gz
CNP0002648	CNS0513122	CNX0411770	CNR0495273	KUH132_HiFispCas9_VEGFAT2	KUH132_HiFispCas9_VEGFAT2.fastq.gz
CNP0002648	CNS0513123	CNX0411771	CNR0495274	KUH132_MOCK_4708	KUH132_MOCK_4708.fastq.gz
CNP0002648	CNS0513124	CNX0411772	CNR0495275	KUH132_MOCK_4729	KUH132_MOCK_4729.fastq.gz
CNP0002648	CNS0513125	CNX0411773	CNR0495276	KUH132_MOCK_5029	KUH132_MOCK_5029.fastq.gz
CNP0002648	CNS0513126	CNX0411774	CNR0495277	KUH132_MOCK_5032	KUH132_MOCK_5032.fastq.gz
CNP0002648	CNS0513127	CNX0411775	CNR0495278	KUH132_MOCK_5035	KUH132_MOCK_5035.fastq.gz
CNP0002648	CNS0513128	CNX0411776	CNR0495279	KUH132_MOCK_5595	KUH132_MOCK_5595.fastq.gz
CNP0002648	CNS0513129	CNX0411777	CNR0495280	KUH132_MOCK_5600	KUH132_MOCK_5600.fastq.gz
CNP0002648	CNS0513130	CNX0411778	CNR0495281	KUH132_MOCK_5675	KUH132_MOCK_5675.fastq.gz
CNP0002648	CNS0513131	CNX0411779	CNR0495282	KUH132_MOCK_5679	KUH132_MOCK_5679.fastq.gz
CNP0002648	CNS0513132	CNX0411780	CNR0495283	KUH132_MOCK_6791	KUH132_MOCK_6791.fastq.gz
CNP0002648	CNS0513133	CNX0411781	CNR0495284	KUH132_MOCK_6832	KUH132_MOCK_6832.fastq.gz
CNP0002648	CNS0513134	CNX0411782	CNR0495285	KUH132_MOCK_6873	KUH132_MOCK_6873.fastq.gz
CNP0002648	CNS0513135	CNX0411783	CNR0495286	KUH132_MOCK_9490	KUH132_MOCK_9490.fastq.gz
CNP0002648	CNS0513136	CNX0411784	CNR0495287	KUH132_MOCK_9506	KUH132_MOCK_9506.fastq.gz
CNP0002648	CNS0513137	CNX0411785	CNR0495288	KUH132_MOCK_11290	KUH132_MOCK_11290.fastq.gz
CNP0002648	CNS0513138	CNX0411786	CNR0495289	KUH132_MOCK_11291	KUH132_MOCK_11291.fastq.gz
CNP0002648	CNS0513139	CNX0411787	CNR0495290	KUH132_MOCK_11296	KUH132_MOCK_11296.fastq.gz
CNP0002648	CNS0513140	CNX0411788	CNR0495291	KUH132_MOCK_11397	KUH132_MOCK_11397.fastq.gz
CNP0002648	CNS0513141	CNX0411789	CNR0495292	KUH132_MOCK_11398	KUH132_MOCK_11398.fastq.gz
CNP0002648	CNS0513142	CNX0411790	CNR0495293	KUH132_MOCK_11414	KUH132_MOCK_11414.fastq.gz
CNP0002648	CNS0513143	CNX0411791	CNR0495294	KUH132_MOCK_11437	KUH132_MOCK_11437.fastq.gz
CNP0002648	CNS0513144	CNX0411792	CNR0495295	KUH132_MOCK_11458	KUH132_MOCK_11458.fastq.gz
CNP0002648	CNS0513145	CNX0411793	CNR0495296	KUH132_MOCK_11510	KUH132_MOCK_11510.fastq.gz
CNP0002648	CNS0513146	CNX0411794	CNR0495297	KUH132_MOCK_HEK293TT4	KUH132_MOCK_HEK293TT4.fastq.gz
CNP0002648	CNS0513147	CNX0411795	CNR0495298	KUH132_MOCK_RGN11179	KUH132_MOCK_RGN11179.fastq.gz
CNP0002648	CNS0513148	CNX0411796	CNR0495299	KUH132_MOCK_RGN11184	KUH132_MOCK_RGN11184.fastq.gz
CNP0002648	CNS0513149	CNX0411797	CNR0495300	KUH132_MOCK_RGN11189	KUH132_MOCK_RGN11189.fastq.gz
CNP0002648	CNS0513150	CNX0411798	CNR0495301	KUH132_MOCK_RGN11208	KUH132_MOCK_RGN11208.fastq.gz
CNP0002648	CNS0513151	CNX0411799	CNR0495302	KUH132_MOCK_RGN11237	KUH132_MOCK_RGN11237.fastq.gz
CNP0002648	CNS0513152	CNX0411800	CNR0495303	KUH132_MOCK_VEGFAT2	KUH132_MOCK_VEGFAT2.fastq.gz
CNP0002648	CNS0513153	CNX0411801	CNR0495304	KUH132_spCas9_4708	KUH132_spCas9_4708.fastq.gz
CNP0002648	CNS0513154	CNX0411802	CNR0495305	KUH132_spCas9_4729	KUH132_spCas9_4729.fastq.gz
CNP0002648	CNS0513155	CNX0411803	CNR0495306	KUH132_spCas9_5029	KUH132_spCas9_5029.fastq.gz
CNP0002648	CNS0513156	CNX0411804	CNR0495307	KUH132_spCas9_5032	KUH132_spCas9_5032.fastq.gz
CNP0002648	CNS0513157	CNX0411805	CNR0495308	KUH132_spCas9_5035	KUH132_spCas9_5035.fastq.gz
CNP0002648	CNS0513158	CNX0411806	CNR0495309	KUH132_spCas9_5595	KUH132_spCas9_5595.fastq.gz
CNP0002648	CNS0513159	CNX0411807	CNR0495310	KUH132_spCas9_5600	KUH132_spCas9_5600.fastq.gz
CNP0002648	CNS0513160	CNX0411808	CNR0495311	KUH132_spCas9_5675	KUH132_spCas9_5675.fastq.gz
CNP0002648	CNS0513161	CNX0411809	CNR0495312	KUH132_spCas9_5679	KUH132_spCas9_5679.fastq.gz
CNP0002648	CNS0513162	CNX0411810	CNR0495313	KUH132_spCas9_6791	KUH132_spCas9_6791.fastq.gz
CNP0002648	CNS0513163	CNX0411811	CNR0495314	KUH132_spCas9_6832	KUH132_spCas9_6832.fastq.gz
CNP0002648	CNS0513164	CNX0411812	CNR0495315	KUH132_spCas9_6873	KUH132_spCas9_6873.fastq.gz
CNP0002648	CNS0513165	CNX0411813	CNR0495316	KUH132_spCas9_9490	KUH132_spCas9_9490.fastq.gz
CNP0002648	CNS0513166	CNX0411814	CNR0495317	KUH132_spCas9_9506	KUH132_spCas9_9506.fastq.gz
CNP0002648	CNS0513167	CNX0411815	CNR0495318	KUH132_spCas9_11290	KUH132_spCas9_11290.fastq.gz
CNP0002648	CNS0513168	CNX0411816	CNR0495319	KUH132_spCas9_11291	KUH132_spCas9_11291.fastq.gz
CNP0002648	CNS0513169	CNX0411817	CNR0495320	KUH132_spCas9_11296	KUH132_spCas9_11296.fastq.gz
CNP0002648	CNS0513170	CNX0411818	CNR0495321	KUH132_spCas9_11397	KUH132_spCas9_11397.fastq.gz
CNP0002648	CNS0513171	CNX0411819	CNR0495322	KUH132_spCas9_11398	KUH132_spCas9_11398.fastq.gz
CNP0002648	CNS0513172	CNX0411820	CNR0495323	KUH132_spCas9_11414	KUH132_spCas9_11414.fastq.gz
CNP0002648	CNS0513173	CNX0411821	CNR0495324	KUH132_spCas9_11437	KUH132_spCas9_11437.fastq.gz
CNP0002648	CNS0513174	CNX0411822	CNR0495325	KUH132_spCas9_11458	KUH132_spCas9_11458.fastq.gz
CNP0002648	CNS0513175	CNX0411823	CNR0495326	KUH132_spCas9_11510	KUH132_spCas9_11510.fastq.gz
CNP0002648	CNS0513176	CNX0411824	CNR0495327	KUH132_spCas9_HEK293TT4	KUH132_spCas9_HEK293TT4.fastq.gz
CNP0002648	CNS0513177	CNX0411825	CNR0495328	KUH132_spCas9_RGN11179	KUH132_spCas9_RGN11179.fastq.gz
CNP0002648	CNS0513178	CNX0411826	CNR0495329	KUH132_spCas9_RGN11184	KUH132_spCas9_RGN11184.fastq.gz
CNP0002648	CNS0513179	CNX0411827	CNR0495330	KUH132_spCas9_RGN11189	KUH132_spCas9_RGN11189.fastq.gz
CNP0002648	CNS0513180	CNX0411828	CNR0495331	KUH132_spCas9_RGN11208	KUH132_spCas9_RGN11208.fastq.gz
CNP0002648	CNS0513181	CNX0411829	CNR0495332	KUH132_spCas9_RGN11237	KUH132_spCas9_RGN11237.fastq.gz
CNP0002648	CNS0513182	CNX0411830	CNR0495333	KUH132_spCas9_VEGFAT2	KUH132_spCas9_VEGFAT2.fastq.gz
CNP0002648	CNS0513183	CNX0411831	CNR0495334	PC9_HiFispCas9_4708	PC9_HiFispCas9_4708.fastq.gz
CNP0002648	CNS0513184	CNX0411832	CNR0495335	PC9_HiFispCas9_4729	PC9_HiFispCas9_4729.fastq.gz
CNP0002648	CNS0513185	CNX0411833	CNR0495336	PC9_HiFispCas9_5029	PC9_HiFispCas9_5029.fastq.gz
CNP0002648	CNS0513186	CNX0411834	CNR0495337	PC9_HiFispCas9_5032	PC9_HiFispCas9_5032.fastq.gz
CNP0002648	CNS0513187	CNX0411835	CNR0495338	PC9_HiFispCas9_5035	PC9_HiFispCas9_5035.fastq.gz
CNP0002648	CNS0513188	CNX0411836	CNR0495339	PC9_HiFispCas9_5595	PC9_HiFispCas9_5595.fastq.gz
CNP0002648	CNS0513189	CNX0411837	CNR0495340	PC9_HiFispCas9_5600	PC9_HiFispCas9_5600.fastq.gz
CNP0002648	CNS0513190	CNX0411838	CNR0495341	PC9_HiFispCas9_5675	PC9_HiFispCas9_5675.fastq.gz
CNP0002648	CNS0513191	CNX0411839	CNR0495342	PC9_HiFispCas9_5679	PC9_HiFispCas9_5679.fastq.gz
CNP0002648	CNS0513192	CNX0411840	CNR0495343	PC9_HiFispCas9_6791	PC9_HiFispCas9_6791.fastq.gz
CNP0002648	CNS0513193	CNX0411841	CNR0495344	PC9_HiFispCas9_6832	PC9_HiFispCas9_6832.fastq.gz
CNP0002648	CNS0513194	CNX0411842	CNR0495345	PC9_HiFispCas9_6873	PC9_HiFispCas9_6873.fastq.gz
CNP0002648	CNS0513195	CNX0411843	CNR0495346	PC9_HiFispCas9_9490	PC9_HiFispCas9_9490.fastq.gz
CNP0002648	CNS0513196	CNX0411844	CNR0495347	PC9_HiFispCas9_9506	PC9_HiFispCas9_9506.fastq.gz
CNP0002648	CNS0513197	CNX0411845	CNR0495348	PC9_HiFispCas9_11290	PC9_HiFispCas9_11290.fastq.gz
CNP0002648	CNS0513198	CNX0411846	CNR0495349	PC9_HiFispCas9_11291	PC9_HiFispCas9_11291.fastq.gz
CNP0002648	CNS0513199	CNX0411847	CNR0495350	PC9_HiFispCas9_11296	PC9_HiFispCas9_11296.fastq.gz
CNP0002648	CNS0513200	CNX0411848	CNR0495351	PC9_HiFispCas9_11397	PC9_HiFispCas9_11397.fastq.gz
CNP0002648	CNS0513201	CNX0411849	CNR0495352	PC9_HiFispCas9_11398	PC9_HiFispCas9_11398.fastq.gz
CNP0002648	CNS0513202	CNX0411850	CNR0495353	PC9_HiFispCas9_11414	PC9_HiFispCas9_11414.fastq.gz
CNP0002648	CNS0513203	CNX0411851	CNR0495354	PC9_HiFispCas9_11437	PC9_HiFispCas9_11437.fastq.gz
CNP0002648	CNS0513204	CNX0411852	CNR0495355	PC9_HiFispCas9_11458	PC9_HiFispCas9_11458.fastq.gz
CNP0002648	CNS0513205	CNX0411853	CNR0495356	PC9_HiFispCas9_11510	PC9_HiFispCas9_11510.fastq.gz
CNP0002648	CNS0513206	CNX0411854	CNR0495357	PC9_HiFispCas9_HEK293TT4	PC9_HiFispCas9_HEK293TT4.fastq.gz
CNP0002648	CNS0513207	CNX0411855	CNR0495358	PC9_HiFispCas9_RGN11179	PC9_HiFispCas9_RGN11179.fastq.gz
CNP0002648	CNS0513208	CNX0411856	CNR0495359	PC9_HiFispCas9_RGN11184	PC9_HiFispCas9_RGN11184.fastq.gz
CNP0002648	CNS0513209	CNX0411857	CNR0495360	PC9_HiFispCas9_RGN11189	PC9_HiFispCas9_RGN11189.fastq.gz
CNP0002648	CNS0513210	CNX0411858	CNR0495361	PC9_HiFispCas9_RGN11208	PC9_HiFispCas9_RGN11208.fastq.gz
CNP0002648	CNS0513211	CNX0411859	CNR0495362	PC9_HiFispCas9_RGN11237	PC9_HiFispCas9_RGN11237.fastq.gz
CNP0002648	CNS0513212	CNX0411860	CNR0495363	PC9_HiFispCas9_VEGFAT2	PC9_HiFispCas9_VEGFAT2.fastq.gz
CNP0002648	CNS0513213	CNX0411861	CNR0495364	PC9_MOCK_4708	PC9_MOCK_4708.fastq.gz
CNP0002648	CNS0513214	CNX0411862	CNR0495365	PC9_MOCK_4729	PC9_MOCK_4729.fastq.gz
CNP0002648	CNS0513215	CNX0411863	CNR0495366	PC9_MOCK_5029	PC9_MOCK_5029.fastq.gz
CNP0002648	CNS0513216	CNX0411864	CNR0495367	PC9_MOCK_5032	PC9_MOCK_5032.fastq.gz
CNP0002648	CNS0513217	CNX0411865	CNR0495368	PC9_MOCK_5035	PC9_MOCK_5035.fastq.gz
CNP0002648	CNS0513218	CNX0411866	CNR0495369	PC9_MOCK_5595	PC9_MOCK_5595.fastq.gz
CNP0002648	CNS0513219	CNX0411867	CNR0495370	PC9_MOCK_5600	PC9_MOCK_5600.fastq.gz
CNP0002648	CNS0513220	CNX0411868	CNR0495371	PC9_MOCK_5675	PC9_MOCK_5675.fastq.gz
CNP0002648	CNS0513221	CNX0411869	CNR0495372	PC9_MOCK_5679	PC9_MOCK_5679.fastq.gz
CNP0002648	CNS0513222	CNX0411870	CNR0495373	PC9_MOCK_6791	PC9_MOCK_6791.fastq.gz
CNP0002648	CNS0513223	CNX0411871	CNR0495374	PC9_MOCK_6832	PC9_MOCK_6832.fastq.gz
CNP0002648	CNS0513224	CNX0411872	CNR0495375	PC9_MOCK_6873	PC9_MOCK_6873.fastq.gz
CNP0002648	CNS0513225	CNX0411873	CNR0495376	PC9_MOCK_9490	PC9_MOCK_9490.fastq.gz
CNP0002648	CNS0513226	CNX0411874	CNR0495377	PC9_MOCK_9506	PC9_MOCK_9506.fastq.gz
CNP0002648	CNS0513227	CNX0411875	CNR0495378	PC9_MOCK_11290	PC9_MOCK_11290.fastq.gz
CNP0002648	CNS0513228	CNX0411876	CNR0495379	PC9_MOCK_11291	PC9_MOCK_11291.fastq.gz
CNP0002648	CNS0513229	CNX0411877	CNR0495380	PC9_MOCK_11296	PC9_MOCK_11296.fastq.gz
CNP0002648	CNS0513230	CNX0411878	CNR0495381	PC9_MOCK_11397	PC9_MOCK_11397.fastq.gz
CNP0002648	CNS0513231	CNX0411879	CNR0495382	PC9_MOCK_11398	PC9_MOCK_11398.fastq.gz
CNP0002648	CNS0513232	CNX0411880	CNR0495383	PC9_MOCK_11414	PC9_MOCK_11414.fastq.gz
CNP0002648	CNS0513233	CNX0411881	CNR0495384	PC9_MOCK_11437	PC9_MOCK_11437.fastq.gz
CNP0002648	CNS0513234	CNX0411882	CNR0495385	PC9_MOCK_11458	PC9_MOCK_11458.fastq.gz
CNP0002648	CNS0513235	CNX0411883	CNR0495386	PC9_MOCK_11510	PC9_MOCK_11510.fastq.gz
CNP0002648	CNS0513236	CNX0411884	CNR0495387	PC9_MOCK_HEK293TT4	PC9_MOCK_HEK293TT4.fastq.gz
CNP0002648	CNS0513237	CNX0411885	CNR0495388	PC9_MOCK_RGN11179	PC9_MOCK_RGN11179.fastq.gz
CNP0002648	CNS0513238	CNX0411886	CNR0495389	PC9_MOCK_RGN11184	PC9_MOCK_RGN11184.fastq.gz
CNP0002648	CNS0513239	CNX0411887	CNR0495390	PC9_MOCK_RGN11189	PC9_MOCK_RGN11189.fastq.gz
CNP0002648	CNS0513240	CNX0411888	CNR0495391	PC9_MOCK_RGN11208	PC9_MOCK_RGN11208.fastq.gz
CNP0002648	CNS0513241	CNX0411889	CNR0495392	PC9_MOCK_RGN11237	PC9_MOCK_RGN11237.fastq.gz
CNP0002648	CNS0513242	CNX0411890	CNR0495393	PC9_MOCK_VEGFAT2	PC9_MOCK_VEGFAT2.fastq.gz
CNP0002648	CNS0513243	CNX0411891	CNR0495394	PC9_spCas9_4708	PC9_spCas9_4708.fastq.gz
CNP0002648	CNS0513244	CNX0411892	CNR0495395	PC9_spCas9_4729	PC9_spCas9_4729.fastq.gz
CNP0002648	CNS0513245	CNX0411893	CNR0495396	PC9_spCas9_5029	PC9_spCas9_5029.fastq.gz
CNP0002648	CNS0513246	CNX0411894	CNR0495397	PC9_spCas9_5032	PC9_spCas9_5032.fastq.gz
CNP0002648	CNS0513247	CNX0411895	CNR0495398	PC9_spCas9_5035	PC9_spCas9_5035.fastq.gz
CNP0002648	CNS0513248	CNX0411896	CNR0495399	PC9_spCas9_5595	PC9_spCas9_5595.fastq.gz
CNP0002648	CNS0513249	CNX0411897	CNR0495400	PC9_spCas9_5600	PC9_spCas9_5600.fastq.gz
CNP0002648	CNS0513250	CNX0411898	CNR0495401	PC9_spCas9_5675	PC9_spCas9_5675.fastq.gz
CNP0002648	CNS0513251	CNX0411899	CNR0495402	PC9_spCas9_5679	PC9_spCas9_5679.fastq.gz
CNP0002648	CNS0513252	CNX0411900	CNR0495403	PC9_spCas9_6791	PC9_spCas9_6791.fastq.gz
CNP0002648	CNS0513253	CNX0411901	CNR0495404	PC9_spCas9_6832	PC9_spCas9_6832.fastq.gz
CNP0002648	CNS0513254	CNX0411902	CNR0495405	PC9_spCas9_6873	PC9_spCas9_6873.fastq.gz
CNP0002648	CNS0513255	CNX0411903	CNR0495406	PC9_spCas9_9490	PC9_spCas9_9490.fastq.gz
CNP0002648	CNS0513256	CNX0411904	CNR0495407	PC9_spCas9_9506	PC9_spCas9_9506.fastq.gz
CNP0002648	CNS0513257	CNX0411905	CNR0495408	PC9_spCas9_11290	PC9_spCas9_11290.fastq.gz
CNP0002648	CNS0513258	CNX0411906	CNR0495409	PC9_spCas9_11291	PC9_spCas9_11291.fastq.gz
CNP0002648	CNS0513259	CNX0411907	CNR0495410	PC9_spCas9_11296	PC9_spCas9_11296.fastq.gz
CNP0002648	CNS0513260	CNX0411908	CNR0495411	PC9_spCas9_11397	PC9_spCas9_11397.fastq.gz
CNP0002648	CNS0513261	CNX0411909	CNR0495412	PC9_spCas9_11398	PC9_spCas9_11398.fastq.gz
CNP0002648	CNS0513262	CNX0411910	CNR0495413	PC9_spCas9_11414	PC9_spCas9_11414.fastq.gz
CNP0002648	CNS0513263	CNX0411911	CNR0495414	PC9_spCas9_11437	PC9_spCas9_11437.fastq.gz
CNP0002648	CNS0513264	CNX0411912	CNR0495415	PC9_spCas9_11458	PC9_spCas9_11458.fastq.gz
CNP0002648	CNS0513265	CNX0411913	CNR0495416	PC9_spCas9_11510	PC9_spCas9_11510.fastq.gz
CNP0002648	CNS0513266	CNX0411914	CNR0495417	PC9_spCas9_HEK293TT4	PC9_spCas9_HEK293TT4.fastq.gz
CNP0002648	CNS0513267	CNX0411915	CNR0495418	PC9_spCas9_RGN11179	PC9_spCas9_RGN11179.fastq.gz
CNP0002648	CNS0513268	CNX0411916	CNR0495419	PC9_spCas9_RGN11184	PC9_spCas9_RGN11184.fastq.gz
CNP0002648	CNS0513269	CNX0411917	CNR0495420	PC9_spCas9_RGN11189	PC9_spCas9_RGN11189.fastq.gz
CNP0002648	CNS0513270	CNX0411918	CNR0495421	PC9_spCas9_RGN11208	PC9_spCas9_RGN11208.fastq.gz
CNP0002648	CNS0513271	CNX0411919	CNR0495422	PC9_spCas9_RGN11237	PC9_spCas9_RGN11237.fastq.gz
CNP0002648	CNS0513272	CNX0411920	CNR0495423	PC9_spCas9_VEGFAT2	PC9_spCas9_VEGFAT2.fastq.gz
CNP0002648	CNS0513273	CNX0411921	CNR0495424	SKOV3_HiFispCas9_4708	SKOV3_HiFispCas9_4708.fastq.gz
CNP0002648	CNS0513274	CNX0411922	CNR0495425	SKOV3_HiFispCas9_4729	SKOV3_HiFispCas9_4729.fastq.gz
CNP0002648	CNS0513275	CNX0411923	CNR0495426	SKOV3_HiFispCas9_5029	SKOV3_HiFispCas9_5029.fastq.gz
CNP0002648	CNS0513276	CNX0411924	CNR0495427	SKOV3_HiFispCas9_5032	SKOV3_HiFispCas9_5032.fastq.gz
CNP0002648	CNS0513277	CNX0411925	CNR0495428	SKOV3_HiFispCas9_5035	SKOV3_HiFispCas9_5035.fastq.gz
CNP0002648	CNS0513278	CNX0411926	CNR0495429	SKOV3_HiFispCas9_5595	SKOV3_HiFispCas9_5595.fastq.gz
CNP0002648	CNS0513279	CNX0411927	CNR0495430	SKOV3_HiFispCas9_5600	SKOV3_HiFispCas9_5600.fastq.gz
CNP0002648	CNS0513280	CNX0411928	CNR0495431	SKOV3_HiFispCas9_5675	SKOV3_HiFispCas9_5675.fastq.gz
CNP0002648	CNS0513281	CNX0411929	CNR0495432	SKOV3_HiFispCas9_5679	SKOV3_HiFispCas9_5679.fastq.gz
CNP0002648	CNS0513282	CNX0411930	CNR0495433	SKOV3_HiFispCas9_6791	SKOV3_HiFispCas9_6791.fastq.gz
CNP0002648	CNS0513283	CNX0411931	CNR0495434	SKOV3_HiFispCas9_6832	SKOV3_HiFispCas9_6832.fastq.gz
CNP0002648	CNS0513284	CNX0411932	CNR0495435	SKOV3_HiFispCas9_6873	SKOV3_HiFispCas9_6873.fastq.gz
CNP0002648	CNS0513285	CNX0411933	CNR0495436	SKOV3_HiFispCas9_9490	SKOV3_HiFispCas9_9490.fastq.gz
CNP0002648	CNS0513286	CNX0411934	CNR0495437	SKOV3_HiFispCas9_9506	SKOV3_HiFispCas9_9506.fastq.gz
CNP0002648	CNS0513287	CNX0411935	CNR0495438	SKOV3_HiFispCas9_11290	SKOV3_HiFispCas9_11290.fastq.gz
CNP0002648	CNS0513288	CNX0411936	CNR0495439	SKOV3_HiFispCas9_11291	SKOV3_HiFispCas9_11291.fastq.gz
CNP0002648	CNS0513289	CNX0411937	CNR0495440	SKOV3_HiFispCas9_11296	SKOV3_HiFispCas9_11296.fastq.gz
CNP0002648	CNS0513290	CNX0411938	CNR0495441	SKOV3_HiFispCas9_11397	SKOV3_HiFispCas9_11397.fastq.gz
CNP0002648	CNS0513291	CNX0411939	CNR0495442	SKOV3_HiFispCas9_11398	SKOV3_HiFispCas9_11398.fastq.gz
CNP0002648	CNS0513292	CNX0411940	CNR0495443	SKOV3_HiFispCas9_11414	SKOV3_HiFispCas9_11414.fastq.gz
CNP0002648	CNS0513293	CNX0411941	CNR0495444	SKOV3_HiFispCas9_11437	SKOV3_HiFispCas9_11437.fastq.gz
CNP0002648	CNS0513294	CNX0411942	CNR0495445	SKOV3_HiFispCas9_11458	SKOV3_HiFispCas9_11458.fastq.gz
CNP0002648	CNS0513295	CNX0411943	CNR0495446	SKOV3_HiFispCas9_11510	SKOV3_HiFispCas9_11510.fastq.gz
CNP0002648	CNS0513296	CNX0411944	CNR0495447	SKOV3_HiFispCas9_HEK293TT4	SKOV3_HiFispCas9_HEK293TT4.fastq.gz
CNP0002648	CNS0513297	CNX0411945	CNR0495448	SKOV3_HiFispCas9_RGN11179	SKOV3_HiFispCas9_RGN11179.fastq.gz
CNP0002648	CNS0513298	CNX0411946	CNR0495449	SKOV3_HiFispCas9_RGN11184	SKOV3_HiFispCas9_RGN11184.fastq.gz
CNP0002648	CNS0513299	CNX0411947	CNR0495450	SKOV3_HiFispCas9_RGN11189	SKOV3_HiFispCas9_RGN11189.fastq.gz
CNP0002648	CNS0513300	CNX0411948	CNR0495451	SKOV3_HiFispCas9_RGN11208	SKOV3_HiFispCas9_RGN11208.fastq.gz
CNP0002648	CNS0513301	CNX0411949	CNR0495452	SKOV3_HiFispCas9_RGN11237	SKOV3_HiFispCas9_RGN11237.fastq.gz
CNP0002648	CNS0513302	CNX0411950	CNR0495453	SKOV3_HiFispCas9_VEGFAT2	SKOV3_HiFispCas9_VEGFAT2.fastq.gz
CNP0002648	CNS0513303	CNX0411951	CNR0495454	SKOV3_MOCK_4708	SKOV3_MOCK_4708.fastq.gz
CNP0002648	CNS0513304	CNX0411952	CNR0495455	SKOV3_MOCK_4729	SKOV3_MOCK_4729.fastq.gz
CNP0002648	CNS0513305	CNX0411953	CNR0495456	SKOV3_MOCK_5029	SKOV3_MOCK_5029.fastq.gz
CNP0002648	CNS0513306	CNX0411954	CNR0495457	SKOV3_MOCK_5032	SKOV3_MOCK_5032.fastq.gz
CNP0002648	CNS0513307	CNX0411955	CNR0495458	SKOV3_MOCK_5035	SKOV3_MOCK_5035.fastq.gz
CNP0002648	CNS0513308	CNX0411956	CNR0495459	SKOV3_MOCK_5595	SKOV3_MOCK_5595.fastq.gz
CNP0002648	CNS0513309	CNX0411957	CNR0495460	SKOV3_MOCK_5600	SKOV3_MOCK_5600.fastq.gz
CNP0002648	CNS0513310	CNX0411958	CNR0495461	SKOV3_MOCK_5675	SKOV3_MOCK_5675.fastq.gz
CNP0002648	CNS0513311	CNX0411959	CNR0495462	SKOV3_MOCK_5679	SKOV3_MOCK_5679.fastq.gz
CNP0002648	CNS0513312	CNX0411960	CNR0495463	SKOV3_MOCK_6791	SKOV3_MOCK_6791.fastq.gz
CNP0002648	CNS0513313	CNX0411961	CNR0495464	SKOV3_MOCK_6832	SKOV3_MOCK_6832.fastq.gz
CNP0002648	CNS0513314	CNX0411962	CNR0495465	SKOV3_MOCK_6873	SKOV3_MOCK_6873.fastq.gz
CNP0002648	CNS0513315	CNX0411963	CNR0495466	SKOV3_MOCK_9490	SKOV3_MOCK_9490.fastq.gz
CNP0002648	CNS0513316	CNX0411964	CNR0495467	SKOV3_MOCK_9506	SKOV3_MOCK_9506.fastq.gz
CNP0002648	CNS0513317	CNX0411965	CNR0495468	SKOV3_MOCK_11290	SKOV3_MOCK_11290.fastq.gz
CNP0002648	CNS0513318	CNX0411966	CNR0495469	SKOV3_MOCK_11291	SKOV3_MOCK_11291.fastq.gz
CNP0002648	CNS0513319	CNX0411967	CNR0495470	SKOV3_MOCK_11296	SKOV3_MOCK_11296.fastq.gz
CNP0002648	CNS0513320	CNX0411968	CNR0495471	SKOV3_MOCK_11397	SKOV3_MOCK_11397.fastq.gz
CNP0002648	CNS0513321	CNX0411969	CNR0495472	SKOV3_MOCK_11398	SKOV3_MOCK_11398.fastq.gz
CNP0002648	CNS0513322	CNX0411970	CNR0495473	SKOV3_MOCK_11414	SKOV3_MOCK_11414.fastq.gz
CNP0002648	CNS0513323	CNX0411971	CNR0495474	SKOV3_MOCK_11437	SKOV3_MOCK_11437.fastq.gz
CNP0002648	CNS0513324	CNX0411972	CNR0495475	SKOV3_MOCK_11458	SKOV3_MOCK_11458.fastq.gz
CNP0002648	CNS0513325	CNX0411973	CNR0495476	SKOV3_MOCK_11510	SKOV3_MOCK_11510.fastq.gz
CNP0002648	CNS0513326	CNX0411974	CNR0495477	SKOV3_MOCK_HEK293TT4	SKOV3_MOCK_HEK293TT4.fastq.gz
CNP0002648	CNS0513327	CNX0411975	CNR0495478	SKOV3_MOCK_RGN11179	SKOV3_MOCK_RGN11179.fastq.gz
CNP0002648	CNS0513328	CNX0411976	CNR0495479	SKOV3_MOCK_RGN11184	SKOV3_MOCK_RGN11184.fastq.gz
CNP0002648	CNS0513329	CNX0411977	CNR0495480	SKOV3_MOCK_RGN11189	SKOV3_MOCK_RGN11189.fastq.gz
CNP0002648	CNS0513330	CNX0411978	CNR0495481	SKOV3_MOCK_RGN11208	SKOV3_MOCK_RGN11208.fastq.gz
CNP0002648	CNS0513331	CNX0411979	CNR0495482	SKOV3_MOCK_RGN11237	SKOV3_MOCK_RGN11237.fastq.gz
CNP0002648	CNS0513332	CNX0411980	CNR0495483	SKOV3_MOCK_VEGFAT2	SKOV3_MOCK_VEGFAT2.fastq.gz
CNP0002648	CNS0513333	CNX0411981	CNR0495484	SKOV3_spCas9_4708	SKOV3_spCas9_4708.fastq.gz
CNP0002648	CNS0513334	CNX0411982	CNR0495485	SKOV3_spCas9_4729	SKOV3_spCas9_4729.fastq.gz
CNP0002648	CNS0513335	CNX0411983	CNR0495486	SKOV3_spCas9_5029	SKOV3_spCas9_5029.fastq.gz
CNP0002648	CNS0513336	CNX0411984	CNR0495487	SKOV3_spCas9_5032	SKOV3_spCas9_5032.fastq.gz
CNP0002648	CNS0513337	CNX0411985	CNR0495488	SKOV3_spCas9_5035	SKOV3_spCas9_5035.fastq.gz
CNP0002648	CNS0513338	CNX0411986	CNR0495489	SKOV3_spCas9_5595	SKOV3_spCas9_5595.fastq.gz
CNP0002648	CNS0513339	CNX0411987	CNR0495490	SKOV3_spCas9_5600	SKOV3_spCas9_5600.fastq.gz
CNP0002648	CNS0513340	CNX0411988	CNR0495491	SKOV3_spCas9_5675	SKOV3_spCas9_5675.fastq.gz
CNP0002648	CNS0513341	CNX0411989	CNR0495492	SKOV3_spCas9_5679	SKOV3_spCas9_5679.fastq.gz
CNP0002648	CNS0513342	CNX0411990	CNR0495493	SKOV3_spCas9_6791	SKOV3_spCas9_6791.fastq.gz
CNP0002648	CNS0513343	CNX0411991	CNR0495494	SKOV3_spCas9_6832	SKOV3_spCas9_6832.fastq.gz
CNP0002648	CNS0513344	CNX0411992	CNR0495495	SKOV3_spCas9_6873	SKOV3_spCas9_6873.fastq.gz
CNP0002648	CNS0513345	CNX0411993	CNR0495496	SKOV3_spCas9_9490	SKOV3_spCas9_9490.fastq.gz
CNP0002648	CNS0513346	CNX0411994	CNR0495497	SKOV3_spCas9_9506	SKOV3_spCas9_9506.fastq.gz
CNP0002648	CNS0513347	CNX0411995	CNR0495498	SKOV3_spCas9_11290	SKOV3_spCas9_11290.fastq.gz
CNP0002648	CNS0513348	CNX0411996	CNR0495499	SKOV3_spCas9_11291	SKOV3_spCas9_11291.fastq.gz
CNP0002648	CNS0513349	CNX0411997	CNR0495500	SKOV3_spCas9_11296	SKOV3_spCas9_11296.fastq.gz
CNP0002648	CNS0513350	CNX0411998	CNR0495501	SKOV3_spCas9_11397	SKOV3_spCas9_11397.fastq.gz
CNP0002648	CNS0513351	CNX0411999	CNR0495502	SKOV3_spCas9_11398	SKOV3_spCas9_11398.fastq.gz
CNP0002648	CNS0513352	CNX0412000	CNR0495503	SKOV3_spCas9_11414	SKOV3_spCas9_11414.fastq.gz
CNP0002648	CNS0513353	CNX0412001	CNR0495504	SKOV3_spCas9_11437	SKOV3_spCas9_11437.fastq.gz
CNP0002648	CNS0513354	CNX0412002	CNR0495505	SKOV3_spCas9_11458	SKOV3_spCas9_11458.fastq.gz
CNP0002648	CNS0513355	CNX0412003	CNR0495506	SKOV3_spCas9_11510	SKOV3_spCas9_11510.fastq.gz
CNP0002648	CNS0513356	CNX0412004	CNR0495507	SKOV3_spCas9_HEK293TT4	SKOV3_spCas9_HEK293TT4.fastq.gz
CNP0002648	CNS0513357	CNX0412005	CNR0495508	SKOV3_spCas9_RGN11179	SKOV3_spCas9_RGN11179.fastq.gz
CNP0002648	CNS0513358	CNX0412006	CNR0495509	SKOV3_spCas9_RGN11184	SKOV3_spCas9_RGN11184.fastq.gz
CNP0002648	CNS0513359	CNX0412007	CNR0495510	SKOV3_spCas9_RGN11189	SKOV3_spCas9_RGN11189.fastq.gz
CNP0002648	CNS0513360	CNX0412008	CNR0495511	SKOV3_spCas9_RGN11208	SKOV3_spCas9_RGN11208.fastq.gz
CNP0002648	CNS0513361	CNX0412009	CNR0495512	SKOV3_spCas9_RGN11237	SKOV3_spCas9_RGN11237.fastq.gz
CNP0002648	CNS0513362	CNX0412010	CNR0495513	SKOV3_spCas9_VEGFAT2	SKOV3_spCas9_VEGFAT2.fastq.gz
CNP0002648	CNS0513363	CNX0412011	CNR0495514	U2OS_HiFispCas9_4708	U2OS_HiFispCas9_4708.fastq.gz
CNP0002648	CNS0513364	CNX0412012	CNR0495515	U2OS_HiFispCas9_4729	U2OS_HiFispCas9_4729.fastq.gz
CNP0002648	CNS0513365	CNX0412013	CNR0495516	U2OS_HiFispCas9_5029	U2OS_HiFispCas9_5029.fastq.gz
CNP0002648	CNS0513366	CNX0412014	CNR0495517	U2OS_HiFispCas9_5032	U2OS_HiFispCas9_5032.fastq.gz
CNP0002648	CNS0513367	CNX0412015	CNR0495518	U2OS_HiFispCas9_5035	U2OS_HiFispCas9_5035.fastq.gz
CNP0002648	CNS0513368	CNX0412016	CNR0495519	U2OS_HiFispCas9_5595	U2OS_HiFispCas9_5595.fastq.gz
CNP0002648	CNS0513369	CNX0412017	CNR0495520	U2OS_HiFispCas9_5600	U2OS_HiFispCas9_5600.fastq.gz
CNP0002648	CNS0513370	CNX0412018	CNR0495521	U2OS_HiFispCas9_5675	U2OS_HiFispCas9_5675.fastq.gz
CNP0002648	CNS0513371	CNX0412019	CNR0495522	U2OS_HiFispCas9_5679	U2OS_HiFispCas9_5679.fastq.gz
CNP0002648	CNS0513372	CNX0412020	CNR0495523	U2OS_HiFispCas9_6791	U2OS_HiFispCas9_6791.fastq.gz
CNP0002648	CNS0513373	CNX0412021	CNR0495524	U2OS_HiFispCas9_6832	U2OS_HiFispCas9_6832.fastq.gz
CNP0002648	CNS0513374	CNX0412022	CNR0495525	U2OS_HiFispCas9_6873	U2OS_HiFispCas9_6873.fastq.gz
CNP0002648	CNS0513375	CNX0412023	CNR0495526	U2OS_HiFispCas9_9490	U2OS_HiFispCas9_9490.fastq.gz
CNP0002648	CNS0513376	CNX0412024	CNR0495527	U2OS_HiFispCas9_9506	U2OS_HiFispCas9_9506.fastq.gz
CNP0002648	CNS0513377	CNX0412025	CNR0495528	U2OS_HiFispCas9_11290	U2OS_HiFispCas9_11290.fastq.gz
CNP0002648	CNS0513378	CNX0412026	CNR0495529	U2OS_HiFispCas9_11291	U2OS_HiFispCas9_11291.fastq.gz
CNP0002648	CNS0513379	CNX0412027	CNR0495530	U2OS_HiFispCas9_11296	U2OS_HiFispCas9_11296.fastq.gz
CNP0002648	CNS0513380	CNX0412028	CNR0495531	U2OS_HiFispCas9_11397	U2OS_HiFispCas9_11397.fastq.gz
CNP0002648	CNS0513381	CNX0412029	CNR0495532	U2OS_HiFispCas9_11398	U2OS_HiFispCas9_11398.fastq.gz
CNP0002648	CNS0513382	CNX0412030	CNR0495533	U2OS_HiFispCas9_11414	U2OS_HiFispCas9_11414.fastq.gz
CNP0002648	CNS0513383	CNX0412031	CNR0495534	U2OS_HiFispCas9_11437	U2OS_HiFispCas9_11437.fastq.gz
CNP0002648	CNS0513384	CNX0412032	CNR0495535	U2OS_HiFispCas9_11458	U2OS_HiFispCas9_11458.fastq.gz
CNP0002648	CNS0513385	CNX0412033	CNR0495536	U2OS_HiFispCas9_11510	U2OS_HiFispCas9_11510.fastq.gz
CNP0002648	CNS0513386	CNX0412034	CNR0495537	U2OS_HiFispCas9_HEK293TT4	U2OS_HiFispCas9_HEK293TT4.fastq.gz
CNP0002648	CNS0513387	CNX0412035	CNR0495538	U2OS_HiFispCas9_RGN11179	U2OS_HiFispCas9_RGN11179.fastq.gz
CNP0002648	CNS0513388	CNX0412036	CNR0495539	U2OS_HiFispCas9_RGN11184	U2OS_HiFispCas9_RGN11184.fastq.gz
CNP0002648	CNS0513389	CNX0412037	CNR0495540	U2OS_HiFispCas9_RGN11189	U2OS_HiFispCas9_RGN11189.fastq.gz
CNP0002648	CNS0513390	CNX0412038	CNR0495541	U2OS_HiFispCas9_RGN11208	U2OS_HiFispCas9_RGN11208.fastq.gz
CNP0002648	CNS0513391	CNX0412039	CNR0495542	U2OS_HiFispCas9_RGN11237	U2OS_HiFispCas9_RGN11237.fastq.gz
CNP0002648	CNS0513392	CNX0412040	CNR0495543	U2OS_HiFispCas9_VEGFAT2	U2OS_HiFispCas9_VEGFAT2.fastq.gz
CNP0002648	CNS0513393	CNX0412041	CNR0495544	U2OS_MOCK_4708	U2OS_MOCK_4708.fastq.gz
CNP0002648	CNS0513394	CNX0412042	CNR0495545	U2OS_MOCK_4729	U2OS_MOCK_4729.fastq.gz
CNP0002648	CNS0513395	CNX0412043	CNR0495546	U2OS_MOCK_5029	U2OS_MOCK_5029.fastq.gz
CNP0002648	CNS0513396	CNX0412044	CNR0495547	U2OS_MOCK_5032	U2OS_MOCK_5032.fastq.gz
CNP0002648	CNS0513397	CNX0412045	CNR0495548	U2OS_MOCK_5035	U2OS_MOCK_5035.fastq.gz
CNP0002648	CNS0513398	CNX0412046	CNR0495549	U2OS_MOCK_5595	U2OS_MOCK_5595.fastq.gz
CNP0002648	CNS0513399	CNX0412047	CNR0495550	U2OS_MOCK_5600	U2OS_MOCK_5600.fastq.gz
CNP0002648	CNS0513400	CNX0412048	CNR0495551	U2OS_MOCK_5675	U2OS_MOCK_5675.fastq.gz
CNP0002648	CNS0513401	CNX0412049	CNR0495552	U2OS_MOCK_5679	U2OS_MOCK_5679.fastq.gz
CNP0002648	CNS0513402	CNX0412050	CNR0495553	U2OS_MOCK_6791	U2OS_MOCK_6791.fastq.gz
CNP0002648	CNS0513403	CNX0412051	CNR0495554	U2OS_MOCK_6832	U2OS_MOCK_6832.fastq.gz
CNP0002648	CNS0513404	CNX0412052	CNR0495555	U2OS_MOCK_6873	U2OS_MOCK_6873.fastq.gz
CNP0002648	CNS0513405	CNX0412053	CNR0495556	U2OS_MOCK_9490	U2OS_MOCK_9490.fastq.gz
CNP0002648	CNS0513406	CNX0412054	CNR0495557	U2OS_MOCK_9506	U2OS_MOCK_9506.fastq.gz
CNP0002648	CNS0513407	CNX0412055	CNR0495558	U2OS_MOCK_11290	U2OS_MOCK_11290.fastq.gz
CNP0002648	CNS0513408	CNX0412056	CNR0495559	U2OS_MOCK_11291	U2OS_MOCK_11291.fastq.gz
CNP0002648	CNS0513409	CNX0412057	CNR0495560	U2OS_MOCK_11296	U2OS_MOCK_11296.fastq.gz
CNP0002648	CNS0513410	CNX0412058	CNR0495561	U2OS_MOCK_11397	U2OS_MOCK_11397.fastq.gz
CNP0002648	CNS0513411	CNX0412059	CNR0495562	U2OS_MOCK_11398	U2OS_MOCK_11398.fastq.gz
CNP0002648	CNS0513412	CNX0412060	CNR0495563	U2OS_MOCK_11414	U2OS_MOCK_11414.fastq.gz
CNP0002648	CNS0513413	CNX0412061	CNR0495564	U2OS_MOCK_11437	U2OS_MOCK_11437.fastq.gz
CNP0002648	CNS0513414	CNX0412062	CNR0495565	U2OS_MOCK_11458	U2OS_MOCK_11458.fastq.gz
CNP0002648	CNS0513415	CNX0412063	CNR0495566	U2OS_MOCK_11510	U2OS_MOCK_11510.fastq.gz
CNP0002648	CNS0513416	CNX0412064	CNR0495567	U2OS_MOCK_HEK293TT4	U2OS_MOCK_HEK293TT4.fastq.gz
CNP0002648	CNS0513417	CNX0412065	CNR0495568	U2OS_MOCK_RGN11179	U2OS_MOCK_RGN11179.fastq.gz
CNP0002648	CNS0513418	CNX0412066	CNR0495569	U2OS_MOCK_RGN11184	U2OS_MOCK_RGN11184.fastq.gz
CNP0002648	CNS0513419	CNX0412067	CNR0495570	U2OS_MOCK_RGN11189	U2OS_MOCK_RGN11189.fastq.gz
CNP0002648	CNS0513420	CNX0412068	CNR0495571	U2OS_MOCK_RGN11208	U2OS_MOCK_RGN11208.fastq.gz
CNP0002648	CNS0513421	CNX0412069	CNR0495572	U2OS_MOCK_RGN11237	U2OS_MOCK_RGN11237.fastq.gz
CNP0002648	CNS0513422	CNX0412070	CNR0495573	U2OS_MOCK_VEGFAT2	U2OS_MOCK_VEGFAT2.fastq.gz
CNP0002648	CNS0513423	CNX0412071	CNR0495574	U2OS_spCas9_4708	U2OS_spCas9_4708.fastq.gz
CNP0002648	CNS0513424	CNX0412072	CNR0495575	U2OS_spCas9_4729	U2OS_spCas9_4729.fastq.gz
CNP0002648	CNS0513425	CNX0412073	CNR0495576	U2OS_spCas9_5029	U2OS_spCas9_5029.fastq.gz
CNP0002648	CNS0513426	CNX0412074	CNR0495577	U2OS_spCas9_5032	U2OS_spCas9_5032.fastq.gz
CNP0002648	CNS0513427	CNX0412075	CNR0495578	U2OS_spCas9_5035	U2OS_spCas9_5035.fastq.gz
CNP0002648	CNS0513428	CNX0412076	CNR0495579	U2OS_spCas9_5595	U2OS_spCas9_5595.fastq.gz
CNP0002648	CNS0513429	CNX0412077	CNR0495580	U2OS_spCas9_5600	U2OS_spCas9_5600.fastq.gz
CNP0002648	CNS0513430	CNX0412078	CNR0495581	U2OS_spCas9_5675	U2OS_spCas9_5675.fastq.gz
CNP0002648	CNS0513431	CNX0412079	CNR0495582	U2OS_spCas9_5679	U2OS_spCas9_5679.fastq.gz
CNP0002648	CNS0513432	CNX0412080	CNR0495583	U2OS_spCas9_6791	U2OS_spCas9_6791.fastq.gz
CNP0002648	CNS0513433	CNX0412081	CNR0495584	U2OS_spCas9_6832	U2OS_spCas9_6832.fastq.gz
CNP0002648	CNS0513434	CNX0412082	CNR0495585	U2OS_spCas9_6873	U2OS_spCas9_6873.fastq.gz
CNP0002648	CNS0513435	CNX0412083	CNR0495586	U2OS_spCas9_9490	U2OS_spCas9_9490.fastq.gz
CNP0002648	CNS0513436	CNX0412084	CNR0495587	U2OS_spCas9_9506	U2OS_spCas9_9506.fastq.gz
CNP0002648	CNS0513437	CNX0412085	CNR0495588	U2OS_spCas9_11290	U2OS_spCas9_11290.fastq.gz
CNP0002648	CNS0513438	CNX0412086	CNR0495589	U2OS_spCas9_11291	U2OS_spCas9_11291.fastq.gz
CNP0002648	CNS0513439	CNX0412087	CNR0495590	U2OS_spCas9_11296	U2OS_spCas9_11296.fastq.gz
CNP0002648	CNS0513440	CNX0412088	CNR0495591	U2OS_spCas9_11397	U2OS_spCas9_11397.fastq.gz
CNP0002648	CNS0513441	CNX0412089	CNR0495592	U2OS_spCas9_11398	U2OS_spCas9_11398.fastq.gz
CNP0002648	CNS0513442	CNX0412090	CNR0495593	U2OS_spCas9_11414	U2OS_spCas9_11414.fastq.gz
CNP0002648	CNS0513443	CNX0412091	CNR0495594	U2OS_spCas9_11437	U2OS_spCas9_11437.fastq.gz
CNP0002648	CNS0513444	CNX0412092	CNR0495595	U2OS_spCas9_11458	U2OS_spCas9_11458.fastq.gz
CNP0002648	CNS0513445	CNX0412093	CNR0495596	U2OS_spCas9_11510	U2OS_spCas9_11510.fastq.gz
CNP0002648	CNS0513446	CNX0412094	CNR0495597	U2OS_spCas9_HEK293TT4	U2OS_spCas9_HEK293TT4.fastq.gz
CNP0002648	CNS0513447	CNX0412095	CNR0495598	U2OS_spCas9_RGN11179	U2OS_spCas9_RGN11179.fastq.gz
CNP0002648	CNS0513448	CNX0412096	CNR0495599	U2OS_spCas9_RGN11184	U2OS_spCas9_RGN11184.fastq.gz
CNP0002648	CNS0513449	CNX0412097	CNR0495600	U2OS_spCas9_RGN11189	U2OS_spCas9_RGN11189.fastq.gz
CNP0002648	CNS0513450	CNX0412098	CNR0495601	U2OS_spCas9_RGN11208	U2OS_spCas9_RGN11208.fastq.gz
CNP0002648	CNS0513451	CNX0412099	CNR0495602	U2OS_spCas9_RGN11237	U2OS_spCas9_RGN11237.fastq.gz
CNP0002648	CNS0513452	CNX0412100	CNR0495603	U2OS_spCas9_VEGFAT2	U2OS_spCas9_VEGFAT2.fastq.gz
